# Supplementary material for: Genome-wide identification and characterization of SPXdomain-containing genes family in eggplant
Source: PeerJ journal article supplement (doi:10.7717/peerj.17341), 2024-05-28
Supplement: 1-16_SPX_in_different_tissues.zip [file spx 6-10 different tissues.xls]

## Sheet: Sample Setup
Block Type	96alum
Chemistry	SYBR_GREEN
Experiment File Name	D:\ShuJu\LZM\spx6-10zuzhichayibiaoda.eds
Experiment Run End Time	2023-07-14 07:20:09 AM CST
Instrument Type	sds7500
Passive Reference	ROX
Well	Sample Name	Sample Color	Biogroup Name	Biogroup Color	Target Name	Target Color	Task	Reporter	Quencher	Comments
A1	root	RGB(132,193,241)			spx6	RGB(139,189,249)	UNKNOWN	SYBR	None
A2	root	RGB(132,193,241)			spx6	RGB(139,189,249)	UNKNOWN	SYBR	None
A3	root	RGB(132,193,241)			spx6	RGB(139,189,249)	UNKNOWN	SYBR	None
A4	root	RGB(132,193,241)			spx7	RGB(208,243,98)	UNKNOWN	SYBR	None
A5	root	RGB(132,193,241)			spx7	RGB(208,243,98)	UNKNOWN	SYBR	None
A6	root	RGB(132,193,241)			spx7	RGB(208,243,98)	UNKNOWN	SYBR	None
A7	root	RGB(132,193,241)			spx8	RGB(244,165,230)	UNKNOWN	SYBR	None
A8	root	RGB(132,193,241)			spx8	RGB(244,165,230)	UNKNOWN	SYBR	None
A9	root	RGB(132,193,241)			spx8	RGB(244,165,230)	UNKNOWN	SYBR	None
A10	root	RGB(132,193,241)			spx9	RGB(255,191,168)	UNKNOWN	SYBR	None
A11	root	RGB(132,193,241)			spx9	RGB(255,191,168)	UNKNOWN	SYBR	None
A12	root	RGB(132,193,241)			spx9	RGB(255,191,168)	UNKNOWN	SYBR	None
B1	strem	RGB(168,255,222)			spx6	RGB(139,189,249)	UNKNOWN	SYBR	None
B2	strem	RGB(168,255,222)			spx6	RGB(139,189,249)	UNKNOWN	SYBR	None
B3	strem	RGB(168,255,222)			spx6	RGB(139,189,249)	UNKNOWN	SYBR	None
B4	strem	RGB(168,255,222)			spx7	RGB(208,243,98)	UNKNOWN	SYBR	None
B5	strem	RGB(168,255,222)			spx7	RGB(208,243,98)	UNKNOWN	SYBR	None
B6	strem	RGB(168,255,222)			spx7	RGB(208,243,98)	UNKNOWN	SYBR	None
B7	strem	RGB(168,255,222)			spx8	RGB(244,165,230)	UNKNOWN	SYBR	None
B8	strem	RGB(168,255,222)			spx8	RGB(244,165,230)	UNKNOWN	SYBR	None
B9	strem	RGB(168,255,222)			spx8	RGB(244,165,230)	UNKNOWN	SYBR	None
B10	strem	RGB(168,255,222)			spx9	RGB(255,191,168)	UNKNOWN	SYBR	None
B11	strem	RGB(168,255,222)			spx9	RGB(255,191,168)	UNKNOWN	SYBR	None
B12	strem	RGB(168,255,222)			spx9	RGB(255,191,168)	UNKNOWN	SYBR	None
C1	leafe	RGB(223,221,142)			spx6	RGB(139,189,249)	UNKNOWN	SYBR	None
C2	leafe	RGB(223,221,142)			spx6	RGB(139,189,249)	UNKNOWN	SYBR	None
C3	leafe	RGB(223,221,142)			spx6	RGB(139,189,249)	UNKNOWN	SYBR	None
C4	leafe	RGB(223,221,142)			spx7	RGB(208,243,98)	UNKNOWN	SYBR	None
C5	leafe	RGB(223,221,142)			spx7	RGB(208,243,98)	UNKNOWN	SYBR	None
C6	leafe	RGB(223,221,142)			spx7	RGB(208,243,98)	UNKNOWN	SYBR	None
C7	leafe	RGB(223,221,142)			spx8	RGB(244,165,230)	UNKNOWN	SYBR	None
C8	leafe	RGB(223,221,142)			spx8	RGB(244,165,230)	UNKNOWN	SYBR	None
C9	leafe	RGB(223,221,142)			spx8	RGB(244,165,230)	UNKNOWN	SYBR	None
C10	leafe	RGB(223,221,142)			spx9	RGB(255,191,168)	UNKNOWN	SYBR	None
C11	leafe	RGB(223,221,142)			spx9	RGB(255,191,168)	UNKNOWN	SYBR	None
C12	leafe	RGB(223,221,142)			spx9	RGB(255,191,168)	UNKNOWN	SYBR	None
D1	flower	RGB(247,255,168)			spx6	RGB(139,189,249)	UNKNOWN	SYBR	None
D2	flower	RGB(247,255,168)			spx6	RGB(139,189,249)	UNKNOWN	SYBR	None
D3	flower	RGB(247,255,168)			spx6	RGB(139,189,249)	UNKNOWN	SYBR	None
D4	flower	RGB(247,255,168)			spx7	RGB(208,243,98)	UNKNOWN	SYBR	None
D5	flower	RGB(247,255,168)			spx7	RGB(208,243,98)	UNKNOWN	SYBR	None
D6	flower	RGB(247,255,168)			spx7	RGB(208,243,98)	UNKNOWN	SYBR	None
D7	flower	RGB(247,255,168)			spx8	RGB(244,165,230)	UNKNOWN	SYBR	None
D8	flower	RGB(247,255,168)			spx8	RGB(244,165,230)	UNKNOWN	SYBR	None
D9	flower	RGB(247,255,168)			spx8	RGB(244,165,230)	UNKNOWN	SYBR	None
D10	flower	RGB(247,255,168)			spx9	RGB(255,191,168)	UNKNOWN	SYBR	None
D11	flower	RGB(247,255,168)			spx9	RGB(255,191,168)	UNKNOWN	SYBR	None
D12	flower	RGB(247,255,168)			spx9	RGB(255,191,168)	UNKNOWN	SYBR	None
E1	fruit	RGB(180,255,0)			spx6	RGB(139,189,249)	UNKNOWN	SYBR	None
E2	fruit	RGB(180,255,0)			spx6	RGB(139,189,249)	UNKNOWN	SYBR	None
E3	fruit	RGB(180,255,0)			spx6	RGB(139,189,249)	UNKNOWN	SYBR	None
E4	fruit	RGB(180,255,0)			spx7	RGB(208,243,98)	UNKNOWN	SYBR	None
E5	fruit	RGB(180,255,0)			spx7	RGB(208,243,98)	UNKNOWN	SYBR	None
E6	fruit	RGB(180,255,0)			spx7	RGB(208,243,98)	UNKNOWN	SYBR	None
E7	fruit	RGB(180,255,0)			spx8	RGB(244,165,230)	UNKNOWN	SYBR	None
E8	fruit	RGB(180,255,0)			spx8	RGB(244,165,230)	UNKNOWN	SYBR	None
E9	fruit	RGB(180,255,0)			spx8	RGB(244,165,230)	UNKNOWN	SYBR	None
E10	fruit	RGB(180,255,0)			spx9	RGB(255,191,168)	UNKNOWN	SYBR	None
E11	fruit	RGB(180,255,0)			spx9	RGB(255,191,168)	UNKNOWN	SYBR	None
E12	fruit	RGB(180,255,0)			spx9	RGB(255,191,168)	UNKNOWN	SYBR	None
F1	seed	RGB(255,204,153)			spx6	RGB(139,189,249)	UNKNOWN	SYBR	None
F2	seed	RGB(255,204,153)			spx6	RGB(139,189,249)	UNKNOWN	SYBR	None
F3	seed	RGB(255,204,153)			spx6	RGB(139,189,249)	UNKNOWN	SYBR	None
F4	seed	RGB(255,204,153)			spx7	RGB(208,243,98)	UNKNOWN	SYBR	None
F5	seed	RGB(255,204,153)			spx7	RGB(208,243,98)	UNKNOWN	SYBR	None
F6	seed	RGB(255,204,153)			spx7	RGB(208,243,98)	UNKNOWN	SYBR	None
F7	seed	RGB(255,204,153)			spx8	RGB(244,165,230)	UNKNOWN	SYBR	None
F8	seed	RGB(255,204,153)			spx8	RGB(244,165,230)	UNKNOWN	SYBR	None
F9	seed	RGB(255,204,153)			spx8	RGB(244,165,230)	UNKNOWN	SYBR	None
F10	seed	RGB(255,204,153)			spx9	RGB(255,191,168)	UNKNOWN	SYBR	None
F11	seed	RGB(255,204,153)			spx9	RGB(255,191,168)	UNKNOWN	SYBR	None
F12	seed	RGB(255,204,153)			spx9	RGB(255,191,168)	UNKNOWN	SYBR	None
G1	root	RGB(132,193,241)			spx10	RGB(249,128,228)	UNKNOWN	SYBR	None
G2	root	RGB(132,193,241)			spx10	RGB(249,128,228)	UNKNOWN	SYBR	None
G3	root	RGB(132,193,241)			spx10	RGB(249,128,228)	UNKNOWN	SYBR	None
G4	strem	RGB(168,255,222)			spx10	RGB(249,128,228)	UNKNOWN	SYBR	None
G5	strem	RGB(168,255,222)			spx10	RGB(249,128,228)	UNKNOWN	SYBR	None
G6	strem	RGB(168,255,222)			spx10	RGB(249,128,228)	UNKNOWN	SYBR	None
G7	leafe	RGB(223,221,142)			spx10	RGB(249,128,228)	UNKNOWN	SYBR	None
G8	leafe	RGB(223,221,142)			spx10	RGB(249,128,228)	UNKNOWN	SYBR	None
G9	leafe	RGB(223,221,142)			spx10	RGB(249,128,228)	UNKNOWN	SYBR	None
G10	flower	RGB(247,255,168)			spx10	RGB(249,128,228)	UNKNOWN	SYBR	None
G11	flower	RGB(247,255,168)			spx10	RGB(249,128,228)	UNKNOWN	SYBR	None
G12	flower	RGB(247,255,168)			spx10	RGB(249,128,228)	UNKNOWN	SYBR	None
H1	fruit	RGB(180,255,0)			spx10	RGB(249,128,228)	UNKNOWN	SYBR	None
H2	fruit	RGB(180,255,0)			spx10	RGB(249,128,228)	UNKNOWN	SYBR	None
H3	fruit	RGB(180,255,0)			spx10	RGB(249,128,228)	UNKNOWN	SYBR	None
H4	seed	RGB(255,204,153)			spx10	RGB(249,128,228)	UNKNOWN	SYBR	None
H5	seed	RGB(255,204,153)			spx10	RGB(249,128,228)	UNKNOWN	SYBR	None
H6	seed	RGB(255,204,153)			spx10	RGB(249,128,228)	UNKNOWN	SYBR	None
H7
H8
H9
H10
H11
H12

## Sheet: Results
Block Type	96alum
Chemistry	SYBR_GREEN
Experiment File Name	D:\ShuJu\LZM\spx6-10zuzhichayibiaoda.eds
Experiment Run End Time	2023-07-14 07:20:09 AM CST
Instrument Type	sds7500
Passive Reference	ROX
Well	Sample Name	Target Name	Task	Reporter	Quencher	RQ	RQ Min	RQ Max	Cт	Cт Mean	Cт SD	ΔCт	ΔCт Mean	ΔCт SE	HK Control ΔCт Mean	HK Control ΔCт SE	ΔΔCт	Automatic Ct Threshold	Ct Threshold	Automatic Baseline	Baseline Start	Baseline End	Efficiency	Tm1	Tm2	Tm3	Comments	HIGHSD	NOAMP	EXPFAIL
A1	root	spx6	UNKNOWN	SYBR	None				25.8823	25.4601	0.373134							TRUE	0.151966	TRUE	3	22	1	78.3704				N	N	N
A2	root	spx6	UNKNOWN	SYBR	None				25.3236	25.4601	0.373134							TRUE	0.151966	TRUE	3	21	1	78.5598				N	N	N
A3	root	spx6	UNKNOWN	SYBR	None				25.1745	25.4601	0.373134							TRUE	0.151966	TRUE	3	20	1	78.5598				N	N	N
A4	root	spx7	UNKNOWN	SYBR	None	1	0.64364	1.55366	25.2927	25.4297	0.134271		-0.0304623	0.228953			0	TRUE	0.187454	TRUE	3	20	1	80.4536				N	N	N
A5	root	spx7	UNKNOWN	SYBR	None	1	0.64364	1.55366	25.4352	25.4297	0.134271		-0.0304623	0.228953			0	TRUE	0.187454	TRUE	3	20	1	80.4536				N	N	N
A6	root	spx7	UNKNOWN	SYBR	None	1	0.64364	1.55366	25.5611	25.4297	0.134271		-0.0304623	0.228953			0	TRUE	0.187454	TRUE	3	20	1	80.4536				N	N	N
A7	root	spx8	UNKNOWN	SYBR	None	1	0.361332	2.76754	35.3016	34.6309	0.836742		9.17079	0.528951			0	TRUE	0.311514	TRUE	3	30	1	79.8855				Y	N	N
A8	root	spx8	UNKNOWN	SYBR	None	1	0.361332	2.76754	34.8978	34.6309	0.836742		9.17079	0.528951			0	TRUE	0.311514	TRUE	3	29	1	79.8855				Y	N	N
A9	root	spx8	UNKNOWN	SYBR	None	1	0.361332	2.76754	33.6933	34.6309	0.836742		9.17079	0.528951			0	TRUE	0.311514	TRUE	3	28	1	79.8855				Y	N	N
A10	root	spx9	UNKNOWN	SYBR	None	1	0.645086	1.55018	25.6563	25.534	0.128184		0.0738989	0.227787			0	TRUE	0.23171	TRUE	3	21	1	81.0218				N	N	N
A11	root	spx9	UNKNOWN	SYBR	None	1	0.645086	1.55018	25.4006	25.534	0.128184		0.0738989	0.227787			0	TRUE	0.23171	TRUE	3	20	1	80.8324				N	N	N
A12	root	spx9	UNKNOWN	SYBR	None	1	0.645086	1.55018	25.5452	25.534	0.128184		0.0738989	0.227787			0	TRUE	0.23171	TRUE	3	21	1	80.643				N	N	N
B1	strem	spx6	UNKNOWN	SYBR	None				27.912	27.9296	0.0156832							TRUE	0.151966	TRUE	3	24	1	78.5598				N	N	N
B2	strem	spx6	UNKNOWN	SYBR	None				27.9422	27.9296	0.0156832							TRUE	0.151966	TRUE	3	23	1	78.7492				N	N	N
B3	strem	spx6	UNKNOWN	SYBR	None				27.9346	27.9296	0.0156832							TRUE	0.151966	TRUE	3	23	1	78.7492				N	N	N
B4	strem	spx7	UNKNOWN	SYBR	None	19.2641	16.7326	22.1786	23.5257	23.6313	0.125822		-4.29831	0.0732055			-4.26784	TRUE	0.187454	TRUE	3	19	1	80.8324				N	N	N
B5	strem	spx7	UNKNOWN	SYBR	None	19.2641	16.7326	22.1786	23.7705	23.6313	0.125822		-4.29831	0.0732055			-4.26784	TRUE	0.187454	TRUE	3	19	1	80.8324				N	N	N
B6	strem	spx7	UNKNOWN	SYBR	None	19.2641	16.7326	22.1786	23.5976	23.6313	0.125822		-4.29831	0.0732055			-4.26784	TRUE	0.187454	TRUE	3	19	1	80.8324				N	N	N
B7	strem	spx8	UNKNOWN	SYBR	None	1.60788	0.511291	5.05639	Undetermined	36.4152	0.734423		8.48563	0.519395			-0.685162	TRUE	0.311514	TRUE	3	39	1	61.7045				N	Y	Y
B8	strem	spx8	UNKNOWN	SYBR	None	1.60788	0.511291	5.05639	36.9345	36.4152	0.734423		8.48563	0.519395			-0.685162	TRUE	0.311514	TRUE	3	32	1	80.0749				Y	N	N
B9	strem	spx8	UNKNOWN	SYBR	None	1.60788	0.511291	5.05639	35.8959	36.4152	0.734423		8.48563	0.519395			-0.685162	TRUE	0.311514	TRUE	3	30	1	80.0749				Y	N	N
B10	strem	spx9	UNKNOWN	SYBR	None	41.3954	37.6546	45.5079	22.6198	22.6321	0.0837892		-5.2975	0.0492158			-5.3714	TRUE	0.23171	TRUE	3	17	1	81.2112				N	N	N
B11	strem	spx9	UNKNOWN	SYBR	None	41.3954	37.6546	45.5079	22.5551	22.6321	0.0837892		-5.2975	0.0492158			-5.3714	TRUE	0.23171	TRUE	3	17	1	81.0218				N	N	N
B12	strem	spx9	UNKNOWN	SYBR	None	41.3954	37.6546	45.5079	22.7214	22.6321	0.0837892		-5.2975	0.0492158			-5.3714	TRUE	0.23171	TRUE	3	18	1	80.8324				N	N	N
C1	leafe	spx6	UNKNOWN	SYBR	None				26.4901	26.6678	0.201933							TRUE	0.151966	TRUE	3	22	1	78.7492				N	N	N
C2	leafe	spx6	UNKNOWN	SYBR	None				26.8874	26.6678	0.201933							TRUE	0.151966	TRUE	3	22	1	78.7492				N	N	N
C3	leafe	spx6	UNKNOWN	SYBR	None				26.626	26.6678	0.201933							TRUE	0.151966	TRUE	3	22	1	78.9386				N	N	N
C4	leafe	spx7	UNKNOWN	SYBR	None	2.03861	1.40013	2.96825	25.5602	25.6098	0.271217		-1.05805	0.195223			-1.02759	TRUE	0.187454	TRUE	3	21	1	80.8324				N	N	N
C5	leafe	spx7	UNKNOWN	SYBR	None	2.03861	1.40013	2.96825	25.3668	25.6098	0.271217		-1.05805	0.195223			-1.02759	TRUE	0.187454	TRUE	3	21	1	81.0218				N	N	N
C6	leafe	spx7	UNKNOWN	SYBR	None	2.03861	1.40013	2.96825	25.9024	25.6098	0.271217		-1.05805	0.195223			-1.02759	TRUE	0.187454	TRUE	3	21	1	80.4536				N	N	N
C7	leafe	spx8	UNKNOWN	SYBR	None	13.4656	9.53381	19.0189	31.8249	32.0874	0.236219		5.41959	0.179421			-3.75121	TRUE	0.311514	TRUE	3	26	1	80.4536				N	N	N
C8	leafe	spx8	UNKNOWN	SYBR	None	13.4656	9.53381	19.0189	32.1545	32.0874	0.236219		5.41959	0.179421			-3.75121	TRUE	0.311514	TRUE	3	26	1	80.2643				N	N	N
C9	leafe	spx8	UNKNOWN	SYBR	None	13.4656	9.53381	19.0189	32.2828	32.0874	0.236219		5.41959	0.179421			-3.75121	TRUE	0.311514	TRUE	3	27	1	80.2643				N	N	N
C10	leafe	spx9	UNKNOWN	SYBR	None	3.17928	2.43186	4.1564	25.0276	25.073	0.131907		-1.5948	0.139256			-1.6687	TRUE	0.23171	TRUE	3	20	1	81.4006				N	N	N
C11	leafe	spx9	UNKNOWN	SYBR	None	3.17928	2.43186	4.1564	24.9698	25.073	0.131907		-1.5948	0.139256			-1.6687	TRUE	0.23171	TRUE	3	20	1	81.2112				N	N	N
C12	leafe	spx9	UNKNOWN	SYBR	None	3.17928	2.43186	4.1564	25.2216	25.073	0.131907		-1.5948	0.139256			-1.6687	TRUE	0.23171	TRUE	3	20	1	80.8324				N	N	N
D1	flower	spx6	UNKNOWN	SYBR	None				26.0088	26.3735	0.316181							TRUE	0.151966	TRUE	3	21	1	78.9386				N	N	N
D2	flower	spx6	UNKNOWN	SYBR	None				26.5405	26.3735	0.316181							TRUE	0.151966	TRUE	3	22	1	78.9386				N	N	N
D3	flower	spx6	UNKNOWN	SYBR	None				26.5711	26.3735	0.316181							TRUE	0.151966	TRUE	3	22	1	79.1279				N	N	N
D4	flower	spx7	UNKNOWN	SYBR	None	5.07764	3.56458	7.23297	24.0424	23.9989	0.0377292		-2.37462	0.183842			-2.34416	TRUE	0.187454	TRUE	3	19	1	81.0218				N	N	N
D5	flower	spx7	UNKNOWN	SYBR	None	5.07764	3.56458	7.23297	23.9782	23.9989	0.0377292		-2.37462	0.183842			-2.34416	TRUE	0.187454	TRUE	3	19	1	81.0218				N	N	N
D6	flower	spx7	UNKNOWN	SYBR	None	5.07764	3.56458	7.23297	23.976	23.9989	0.0377292		-2.37462	0.183842			-2.34416	TRUE	0.187454	TRUE	3	19	1	81.0218				N	N	N
D7	flower	spx8	UNKNOWN	SYBR	None	22.6155	15.5335	32.9264	30.985	31.045	0.119693		4.67155	0.19519			-4.49924	TRUE	0.311514	TRUE	3	25	1	80.4536				N	N	N
D8	flower	spx8	UNKNOWN	SYBR	None	22.6155	15.5335	32.9264	30.9672	31.045	0.119693		4.67155	0.19519			-4.49924	TRUE	0.311514	TRUE	3	25	1	80.4536				N	N	N
D9	flower	spx8	UNKNOWN	SYBR	None	22.6155	15.5335	32.9264	31.1829	31.045	0.119693		4.67155	0.19519			-4.49924	TRUE	0.311514	TRUE	3	26	1	80.4536				N	N	N
D10	flower	spx9	UNKNOWN	SYBR	None	6.18527	4.20508	9.09795	23.6531	23.8186	0.143674		-2.55494	0.20051			-2.62884	TRUE	0.23171	TRUE	3	19	1	81.4006				N	N	N
D11	flower	spx9	UNKNOWN	SYBR	None	6.18527	4.20508	9.09795	23.8903	23.8186	0.143674		-2.55494	0.20051			-2.62884	TRUE	0.23171	TRUE	3	18	1	81.2112				N	N	N
D12	flower	spx9	UNKNOWN	SYBR	None	6.18527	4.20508	9.09795	23.9122	23.8186	0.143674		-2.55494	0.20051			-2.62884	TRUE	0.23171	TRUE	3	18	1	81.0218				N	N	N
E1	fruit	spx6	UNKNOWN	SYBR	None				29.5067	29.5299	0.0225858							TRUE	0.151966	TRUE	3	25	1	78.9386				N	N	N
E2	fruit	spx6	UNKNOWN	SYBR	None				29.5312	29.5299	0.0225858							TRUE	0.151966	TRUE	3	25	1	78.9386				N	N	N
E3	fruit	spx6	UNKNOWN	SYBR	None				29.5518	29.5299	0.0225858							TRUE	0.151966	TRUE	3	25	1	79.1279				N	N	N
E4	fruit	spx7	UNKNOWN	SYBR	None	9.21771	7.79417	10.9012	26.1446	26.295	0.149277		-3.23487	0.0871661			-3.20441	TRUE	0.187454	TRUE	3	21	1	81.0218				N	N	N
E5	fruit	spx7	UNKNOWN	SYBR	None	9.21771	7.79417	10.9012	26.2974	26.295	0.149277		-3.23487	0.0871661			-3.20441	TRUE	0.187454	TRUE	3	21	1	81.0218				N	N	N
E6	fruit	spx7	UNKNOWN	SYBR	None	9.21771	7.79417	10.9012	26.4431	26.295	0.149277		-3.23487	0.0871661			-3.20441	TRUE	0.187454	TRUE	3	21	1	81.0218				N	N	N
E7	fruit	spx8	UNKNOWN	SYBR	None	3.59444	3.45063	3.74425	Undetermined	36.8549	0.0185797		7.32503	0.0185106			-1.84577	TRUE	0.311514	TRUE	3	39	1	62.0832				N	Y	Y
E8	fruit	spx8	UNKNOWN	SYBR	None	3.59444	3.45063	3.74425	36.8681	36.8549	0.0185797		7.32503	0.0185106			-1.84577	TRUE	0.311514	TRUE	3	31	1	80.4536				N	N	N
E9	fruit	spx8	UNKNOWN	SYBR	None	3.59444	3.45063	3.74425	36.8418	36.8549	0.0185797		7.32503	0.0185106			-1.84577	TRUE	0.311514	TRUE	3	31	1	80.4536				N	N	N
E10	fruit	spx9	UNKNOWN	SYBR	None	11.7081	10.7603	12.7393	26.041	26.0544	0.0725376		-3.47553	0.0438627			-3.54943	TRUE	0.23171	TRUE	3	21	1	81.4006				N	N	N
E11	fruit	spx9	UNKNOWN	SYBR	None	11.7081	10.7603	12.7393	26.1327	26.0544	0.0725376		-3.47553	0.0438627			-3.54943	TRUE	0.23171	TRUE	3	21	1	81.2112				N	N	N
E12	fruit	spx9	UNKNOWN	SYBR	None	11.7081	10.7603	12.7393	25.9894	26.0544	0.0725376		-3.47553	0.0438627			-3.54943	TRUE	0.23171	TRUE	3	21	1	81.0218				N	N	N
F1	seed	spx6	UNKNOWN	SYBR	None				30.0769	30.8317	0.78401							TRUE	0.151966	TRUE	3	26	1	78.7492				Y	N	N
F2	seed	spx6	UNKNOWN	SYBR	None				31.642	30.8317	0.78401							TRUE	0.151966	TRUE	3	27	1	78.9386				Y	N	N
F3	seed	spx6	UNKNOWN	SYBR	None				30.7762	30.8317	0.78401							TRUE	0.151966	TRUE	3	26	1	78.9386				Y	N	N
F4	seed	spx7	UNKNOWN	SYBR	None	102.2	42.6647	244.813	24.0728	24.126	0.0588088		-6.70572	0.45392			-6.67525	TRUE	0.187454	TRUE	3	19	1	81.0218				N	N	N
F5	seed	spx7	UNKNOWN	SYBR	None	102.2	42.6647	244.813	24.116	24.126	0.0588088		-6.70572	0.45392			-6.67525	TRUE	0.187454	TRUE	3	19	1	81.0218				N	N	N
F6	seed	spx7	UNKNOWN	SYBR	None	102.2	42.6647	244.813	24.1891	24.126	0.0588088		-6.70572	0.45392			-6.67525	TRUE	0.187454	TRUE	3	19	1	81.0218				N	N	N
F7	seed	spx8	UNKNOWN	SYBR	None	650	260.699	1620.64	30.9297	30.6582	0.24784		-0.173504	0.474727			-9.3443	TRUE	0.311514	TRUE	3	25	1	80.4536				N	N	N
F8	seed	spx8	UNKNOWN	SYBR	None	650	260.699	1620.64	30.6009	30.6582	0.24784		-0.173504	0.474727			-9.3443	TRUE	0.311514	TRUE	3	25	1	80.2643				N	N	N
F9	seed	spx8	UNKNOWN	SYBR	None	650	260.699	1620.64	30.444	30.6582	0.24784		-0.173504	0.474727			-9.3443	TRUE	0.311514	TRUE	3	25	1	80.2643				N	N	N
F10	seed	spx9	UNKNOWN	SYBR	None	97.7816	40.437	236.448	24.228	24.2941	0.129906		-6.53759	0.45882			-6.61149	TRUE	0.23171	TRUE	3	19	1	81.4006				N	N	N
F11	seed	spx9	UNKNOWN	SYBR	None	97.7816	40.437	236.448	24.2106	24.2941	0.129906		-6.53759	0.45882			-6.61149	TRUE	0.23171	TRUE	3	19	1	81.2112				N	N	N
F12	seed	spx9	UNKNOWN	SYBR	None	97.7816	40.437	236.448	24.4438	24.2941	0.129906		-6.53759	0.45882			-6.61149	TRUE	0.23171	TRUE	3	19	1	80.8324				N	N	N
G1	root	spx10	UNKNOWN	SYBR	None	1	0.655719	1.52504	27.1412	27.1831	0.0709734		1.72292	0.219292			0	TRUE	0.32276	TRUE	3	22	1	78.9386				N	N	N
G2	root	spx10	UNKNOWN	SYBR	None	1	0.655719	1.52504	27.265	27.1831	0.0709734		1.72292	0.219292			0	TRUE	0.32276	TRUE	3	21	1	79.1279				N	N	N
G3	root	spx10	UNKNOWN	SYBR	None	1	0.655719	1.52504	27.143	27.1831	0.0709734		1.72292	0.219292			0	TRUE	0.32276	TRUE	3	21	1	79.1279				N	N	N
G4	strem	spx10	UNKNOWN	SYBR	None	20.25	18.2283	22.496	25.2818	25.3127	0.093356		-2.61693	0.0546544			-4.33985	TRUE	0.32276	TRUE	3	19	1	79.1279				N	N	N
G5	strem	spx10	UNKNOWN	SYBR	None	20.25	18.2283	22.496	25.2387	25.3127	0.093356		-2.61693	0.0546544			-4.33985	TRUE	0.32276	TRUE	3	20	1	79.3173				N	N	N
G6	strem	spx10	UNKNOWN	SYBR	None	20.25	18.2283	22.496	25.4176	25.3127	0.093356		-2.61693	0.0546544			-4.33985	TRUE	0.32276	TRUE	3	20	1	79.1279				N	N	N
G7	leafe	spx10	UNKNOWN	SYBR	None	25.1462	20.011	31.5992	23.7823	23.7385	0.038576		-2.92934	0.118694			-4.65227	TRUE	0.32276	TRUE	3	18	1	79.1279				N	N	N
G8	leafe	spx10	UNKNOWN	SYBR	None	25.1462	20.011	31.5992	23.7233	23.7385	0.038576		-2.92934	0.118694			-4.65227	TRUE	0.32276	TRUE	3	18	1	79.1279				N	N	N
G9	leafe	spx10	UNKNOWN	SYBR	None	25.1462	20.011	31.5992	23.7098	23.7385	0.038576		-2.92934	0.118694			-4.65227	TRUE	0.32276	TRUE	3	18	1	79.1279				N	N	N
G10	flower	spx10	UNKNOWN	SYBR	None	21.2856	13.309	34.0428	23.7846	23.6846	0.280446		-2.68888	0.244009			-4.4118	TRUE	0.32276	TRUE	3	18	1	78.9386				N	N	N
G11	flower	spx10	UNKNOWN	SYBR	None	21.2856	13.309	34.0428	23.9014	23.6846	0.280446		-2.68888	0.244009			-4.4118	TRUE	0.32276	TRUE	3	18	1	78.7492				N	N	N
G12	flower	spx10	UNKNOWN	SYBR	None	21.2856	13.309	34.0428	23.3679	23.6846	0.280446		-2.68888	0.244009			-4.4118	TRUE	0.32276	TRUE	3	18	1	78.7492				N	N	N
H1	fruit	spx10	UNKNOWN	SYBR	None	84.903	80.5867	89.4506	24.7995	24.8451	0.0411711		-4.68482	0.027112			-6.40774	TRUE	0.32276	TRUE	3	19	1	78.7492				N	N	N
H2	fruit	spx10	UNKNOWN	SYBR	None	84.903	80.5867	89.4506	24.8561	24.8451	0.0411711		-4.68482	0.027112			-6.40774	TRUE	0.32276	TRUE	3	19	1	78.9386				N	N	N
H3	fruit	spx10	UNKNOWN	SYBR	None	84.903	80.5867	89.4506	24.8796	24.8451	0.0411711		-4.68482	0.027112			-6.40774	TRUE	0.32276	TRUE	3	19	1	78.9386				N	N	N
H4	seed	spx10	UNKNOWN	SYBR	None	121.512	47.4094	311.439	25.8961	25.6297	0.320736		-5.20203	0.489061			-6.92495	TRUE	0.32276	TRUE	3	20	1	78.9386				N	N	N
H5	seed	spx10	UNKNOWN	SYBR	None	121.512	47.4094	311.439	25.7193	25.6297	0.320736		-5.20203	0.489061			-6.92495	TRUE	0.32276	TRUE	3	20	1	78.9386				N	N	N
H6	seed	spx10	UNKNOWN	SYBR	None	121.512	47.4094	311.439	25.2737	25.6297	0.320736		-5.20203	0.489061			-6.92495	TRUE	0.32276	TRUE	3	19	1	78.9386				N	N	N
Analysis Type	Singleplex
Endogenous Control	spx6
RQ Min/Max Confidence Level	95.0
Reference Sample	root

## Sheet: Raw Data
Block Type	96alum
Chemistry	SYBR_GREEN
Experiment File Name	D:\ShuJu\LZM\spx6-10zuzhichayibiaoda.eds
Experiment Run End Time	2023-07-14 07:20:09 AM CST
Instrument Type	sds7500
Passive Reference	ROX
Well	Cycle	1	2	3	4	5
A1	1	19495.3	3965.29	14004.1	100591	3230.58
A2	1	34819.5	5337.44	19267.9	126803	3349.21
A3	1	31156.6	5404.33	20488	126857	2626.92
A4	1	38432.1	6425.34	20393.2	118952	3293.04
A5	1	39110.4	6680.04	21730.5	125011	3198.22
A6	1	47433.1	9358.78	24921.9	130883	4891.12
A7	1	44347.1	8375.12	23521.9	128769	4926.03
A8	1	200880	32896	74425.4	382690	20229.5
A9	1	43742.8	10086.7	24052.9	132655	3751.03
A10	1	41859.2	8462.21	21513.7	132257	4625.18
A11	1	43642	8225.59	20540.8	137226	3593.74
A12	1	52246.6	9509.68	19597.7	135741	4650.94
B1	1	36334.8	5714.69	19543	131114	3963.68
B2	1	42858	6810.32	22472.3	136447	4249.57
B3	1	33161.3	6764.09	23187.8	131799	3813.66
B4	1	37243.9	6260.74	22522.1	127555	4137.78
B5	1	40550.9	6920.46	26170.1	148407	4592.81
B6	1	33023.1	5652.64	23421.5	127433	2864.09
B7	1	32832.1	5855.92	24733.4	133850	3649.99
B8	1	123693	19622.5	77166.9	430028	11979
B9	1	42872	8033.06	25665.5	140178	3965.01
B10	1	54933.4	10293.1	24443.8	140687	3622.36
B11	1	58285.3	10944.1	24133.5	144893	5082.95
B12	1	87737.8	16358.8	25555.9	151483	7730.8
C1	1	37850.3	6183	20271.1	130077	3617.86
C2	1	45182.7	7608.84	28296.4	172847	5811.2
C3	1	37449.6	5627.29	23364.3	131869	3083.57
C4	1	37766.9	6783.68	23332.2	126016	3502.77
C5	1	38999	6610.01	24551.3	128310	3794.54
C6	1	42533.1	5896.69	23388.3	121513	2262.02
C7	1	34223.5	6079.34	25117.7	130182	2654.14
C8	1	39101.3	6583.53	25732.1	133484	3625.8
C9	1	50462	10017.5	26307.8	130876	4668
C10	1	48668.1	9950.19	24315.8	134721	4167.92
C11	1	44749	9061.88	22261.1	133175	2598.7
C12	1	55120.8	10098.4	21677.3	138365	3842.01
D1	1	41620.1	6664.46	21348	133159	3432.6
D2	1	34199.8	5793.16	22254	130934	3578.3
D3	1	48217.9	8528.08	25884	133667	6045.12
D4	1	38858.2	7154.07	24108.5	124098	5207.74
D5	1	41838.2	7604.05	25514.5	128755	3734.73
D6	1	44733.6	8093.28	25216.1	121866	5231.46
D7	1	29666.6	5025.31	23089.4	117313	3143.21
D8	1	31717	6728.32	25781.4	130795	3445.04
D9	1	38408.3	9999.38	25170.5	124545	4616.06
D10	1	58606.1	11267.5	25014	129544	5293.73
D11	1	59503.5	12424.1	23447	131625	3311.17
D12	1	147209	20802.6	27546.7	141074	6557.45
E1	1	52966.9	9788.45	21291.7	131204	4511.15
E2	1	41839.4	6938.28	22023.3	125170	3821.26
E3	1	72217.2	10078.2	26446.5	136029	7598.37
E4	1	41999	8403.04	26023.3	133934	3999.38
E5	1	34883.3	6255.08	24825.6	128046	3688.96
E6	1	176890	28620.4	37443.5	142938	16044.6
E7	1	48262.7	9103.71	25973.3	124133	8207.82
E8	1	38101.3	7565.4	26153.7	128920	5079.69
E9	1	40721.1	10192.6	28582.1	130823	4323.76
E10	1	51112.1	10481.6	24415.4	127742	4663.1
E11	1	48433.6	9573.67	22368.2	126291	5734.98
E12	1	61811.2	11511.5	22384.8	133436	5415.22
F1	1	46275.6	8377.54	23670.3	141678	8698.88
F2	1	42162.6	6827.56	22957.5	134911	3411.2
F3	1	33652.6	5746.36	24102	136264	3339.94
F4	1	37944.4	6547.5	25101.9	133700	3369.89
F5	1	35983.7	6168.72	25479.6	133989	2677.74
F6	1	63632.1	12011.2	30493.7	140478	7155.17
F7	1	32044.9	5947.11	26069.7	134304	4260.76
F8	1	34441.9	5923.3	24742.3	128118	3221.28
F9	1	37743.1	7174.13	24630.8	130063	4468.35
F10	1	44027	8759.38	22942.9	129908	4740.98
F11	1	42064.6	8085.95	21899.4	131295	2605.79
F12	1	65252.5	12777.6	24202.1	141190	6451.9
G1	1	39250.2	5978.98	21076.6	140087	3469.48
G2	1	48500	7837.7	24179.4	145075	3608.94
G3	1	35224.6	5933.59	23604.8	137389	3548.54
G4	1	30437.5	4930.12	23880.2	133949	2678.18
G5	1	28470.7	4620.89	24456.2	133828	2914.8
G6	1	29682.2	4957.95	25026.9	133149	2902.06
G7	1	27666.7	4696.11	23545	126211	2877.04
G8	1	33122.7	6022.15	25069.3	133453	4996.61
G9	1	37311.4	6059.79	23604.7	129319	3623.16
G10	1	48312	8882.84	23742.8	128516	3904.79
G11	1	68020.2	11462.1	24728.6	134090	8251.92
G12	1	40886.6	6071.4	22374.8	148622	3321.66
H1	1	53808.5	8893.31	23615.6	153959	8879.78
H2	1	39536.8	6248.82	23880.1	155373	4137.22
H3	1	36165.4	6809.66	24424.6	145573	5177.69
H4	1	33329.8	5942.41	25072.1	143860	3130.18
H5	1	32009.5	5448.62	24950.6	141068	3049.92
H6	1	37756.1	6154.99	23611.6	128138	3853.64
H7	1	30806	6648.09	4164.39	5859.59	3575.07
H8	1	31775.3	5107.06	3418.53	5697.37	3253.67
H9	1	34342.3	5131.34	3448.51	5632.21	2976.71
H10	1	42465.2	9620.77	6937.15	9831.65	5887.2
H11	1	39546	6243.59	3972.05	5971.92	3316.08
H12	1	43490.1	5603.65	3374.13	5687.05	3534.16
A1	2	19497.1	4038.97	14092.1	100494	3129.67
A2	2	34915.5	5418.41	19318.5	126026	3410.1
A3	2	31073.6	5267.91	20626.1	126907	3157.06
A4	2	37994.3	6370.02	20385.2	118623	2916.12
A5	2	39462.2	6630.62	22099.3	124818	3248.31
A6	2	47915.2	9683.94	24844.5	130099	4878.57
A7	2	45154.6	8523.37	23655.1	128857	4955.31
A8	2	203339	33166.4	74845.1	384090	20934.4
A9	2	44402.6	10715.2	24373.6	132676	3485.99
A10	2	42462.5	8701.91	21604.4	132263	4162.11
A11	2	43229.7	8205.23	20673.8	136880	3461.33
A12	2	52330.5	10029	19593.6	136001	4729.14
B1	2	36475.2	5934.02	19426.5	130880	3867.25
B2	2	42848.2	7299.54	22550.2	135044	4412.47
B3	2	33673.2	6935.3	23287.5	131088	3690.95
B4	2	37451.1	6409.15	22436.1	126707	4125.92
B5	2	40478.2	6689.89	25994.7	147210	4195.8
B6	2	32819	5535.19	23178.7	126026	2921.21
B7	2	32542.4	5570.95	24463.4	132205	3264.75
B8	2	121844	19147.8	76325.3	425997	12507.4
B9	2	42774.3	8298.72	25409.3	139013	3881.2
B10	2	55302.4	10199.3	24189.6	139620	4135.75
B11	2	58699.8	11071.3	23719.8	143376	5153.38
B12	2	90853.8	16744.7	25634.7	152324	7494.66
C1	2	38155.9	6174.42	20659.2	130298	3534.87
C2	2	45664.8	7581.61	28181.3	172036	5316.16
C3	2	37371.9	5525.52	23179.7	131082	3000.32
C4	2	37808.2	6257.8	23067.4	125056	3659.34
C5	2	38472.6	6482.53	24388.2	127031	4012.2
C6	2	42648.6	5973.94	23301.8	121679	2147.97
C7	2	34121.7	5844.32	24965.8	128228	2997.96
C8	2	38953.7	6548.03	25619.6	131392	3617.71
C9	2	50379.7	10080.1	26079.9	129693	4588.79
C10	2	48157	9546	24274.8	133483	4426.48
C11	2	44660.5	9244.43	22228.4	131727	2734.54
C12	2	56060.5	10023.6	21718.8	139214	3520.76
D1	2	42006.4	6693.97	21312	132928	3792.31
D2	2	34412	5362.33	21971.7	130509	3007.08
D3	2	47536	8545.99	25740.2	132842	6166.25
D4	2	38618.6	7385.21	24069.3	123217	5209.86
D5	2	41585.8	7513.34	25199	127209	3483.09
D6	2	44716	7944.68	24914.4	120486	4965.79
D7	2	29397.6	5114.25	22809.9	115662	2723.21
D8	2	31493.5	6596.55	25466.5	128813	2977
D9	2	37955.2	9834.95	24842.9	123336	4639.98
D10	2	57887.6	11151.2	24672.9	127798	4781.87
D11	2	59773.4	12852.3	23294.5	130035	3687.53
D12	2	149139	21042.4	27736.8	141704	6907.23
E1	2	53822.1	10270.9	21529.4	131332	4311.86
E2	2	41640.5	7057.44	21883.1	124817	3793.1
E3	2	71955	9887.64	26450.2	135248	7588.96
E4	2	41509.5	8219.8	25817.9	132845	3831.29
E5	2	34359.7	6201.12	24629.2	126650	3601.96
E6	2	174279	28180.8	36913.2	141134	15702.7
E7	2	47968.2	8837.61	25705.8	122547	8216.34
E8	2	37740.3	7411.08	25618.3	126724	5250.52
E9	2	40445.9	10238.4	28407.9	129353	4118.05
E10	2	50449.1	10389.2	24097.6	126191	4560.27
E11	2	48389.6	9697.02	22310.8	124507	5741.67
E12	2	62821.4	11927	22476.8	133861	5364.65
F1	2	46780.2	8484.74	23710.9	140613	9371.26
F2	2	43250.3	6689.15	22751.5	133587	2965.64
F3	2	33852.7	5807.19	24116.2	135547	3220.11
F4	2	38160.1	6594.42	25055	132295	3469.9
F5	2	35809.4	6360.63	25425.6	132877	2712.51
F6	2	62839.8	11989.3	30114.4	139451	7098.58
F7	2	31695.3	5639.23	25914.1	132854	3969.73
F8	2	34100.3	5881.05	24449.2	127017	3028.3
F9	2	37002.6	7170.11	24349.4	128686	4494.73
F10	2	43763.7	8503.55	23035.5	128548	4461.43
F11	2	41856.7	7973.26	21656	130290	2836.62
F12	2	65949.6	13115.6	24442.9	142162	6579.33
G1	2	39023.6	5781.7	21183	139532	4049.44
G2	2	48824.3	7792.75	23967.3	143162	3750.06
G3	2	35437.6	5815.44	23745.4	136160	3188.99
G4	2	30511.1	4788.92	23733.4	132720	2647.14
G5	2	28505.4	4584.5	24318.4	132521	3011.04
G6	2	29681.6	5127.2	24816.5	131926	2724.87
G7	2	27814.7	4591.3	23372.6	124980	2768.02
G8	2	33412.1	5979.56	24957	132685	4453.96
G9	2	37170.7	6116.35	23510.1	128117	3655.57
G10	2	49417.3	9325.24	23594.1	127466	4036.66
G11	2	67970.4	11265	24618.6	133039	8074.31
G12	2	41188.8	6420.84	22591.1	148562	3461.96
H1	2	54269.2	8766.95	23601.4	154575	8706.18
H2	2	39296.5	6650.29	24034.6	155087	3857.1
H3	2	35862.4	6572.36	24392.8	144867	5248.15
H4	2	33818.5	6010.86	25022.7	143623	3302.32
H5	2	32140.4	5694.4	24873.6	140725	2919.3
H6	2	38467.3	6339.42	23806.7	128339	4212.31
H7	2	31139.9	6911.56	4302.86	5795.19	3559.99
H8	2	31760.4	5147.61	3305.34	5724.13	3543.1
H9	2	34349.3	5166.39	3433.85	5818.58	3151.7
H10	2	42456	9648.97	7014.34	9696.46	5887.2
H11	2	39449.5	6394.19	4124.19	5903.23	3836.06
H12	2	44033.8	5565.16	3288.59	5798.95	3644.29
A1	3	19814.7	3829.65	14144	100992	3168.59
A2	3	34685.8	5104.25	19130.1	126412	3131.92
A3	3	30796.6	5392.96	20752	126711	2945.75
A4	3	39097.7	6257.1	20385.2	118203	2940.4
A5	3	39469	6795.33	22066.2	124450	3122.58
A6	3	48168.4	9541.16	24650	128953	5107.69
A7	3	45433.1	8754.4	23590.4	128746	5063.96
A8	3	206434	33402.6	75288	382868	21663.9
A9	3	44783.7	10390.8	24220.9	132678	3870.69
A10	3	42744.4	8846.19	21470	131726	4781.01
A11	3	43425.8	8356.1	20482.9	136322	3129.14
A12	3	53191.4	9866.8	19692.3	136999	4362.3
B1	3	35731.4	5995.84	19748.6	130920	3911.23
B2	3	43420.6	7112.18	22387.4	135170	4287.36
B3	3	33655.5	7312.22	23264.8	130605	3774.72
B4	3	37366.8	6494.13	22437.2	126330	4165.82
B5	3	40204.2	6750.22	25854.6	146456	4396.12
B6	3	32622.2	5571.33	23192.7	125507	2725.37
B7	3	32458.2	5575.32	24313.1	131600	3471.58
B8	3	121773	19209.8	76376	423607	11585
B9	3	42601.9	8062.27	25384.9	138132	4041.46
B10	3	55421.1	10272.4	24431.9	139318	3882.01
B11	3	58350.5	11057.3	23942.8	142638	5047.15
B12	3	91627.9	16986.6	25749.4	152927	7722.37
C1	3	38626.7	6357.24	20584.4	130234	3872.44
C2	3	46278.9	7241.24	28279.5	171886	4998.04
C3	3	37732.3	5732.52	22960.4	130594	3450.31
C4	3	37736.3	6554.15	23116.2	124706	3689.57
C5	3	38339.6	6575.42	24292.2	126595	3921.93
C6	3	42770.5	5704.81	23248.5	121356	2351.88
C7	3	33940.4	5872.91	24727.8	127548	3030.94
C8	3	38562.2	6519.47	25442.7	130983	3341.78
C9	3	50255.7	10169.7	26013.8	128869	4606.79
C10	3	47958.3	9821.98	24146.9	133207	3988.91
C11	3	45217.8	9153.7	22159.8	131489	2587.66
C12	3	56223.6	10706.6	21845.5	139258	3915.51
D1	3	42228.2	6722.42	21417	133134	3370.08
D2	3	34804	5606.54	22137.5	130577	3210.62
D3	3	47385.6	8492.26	25762.4	132460	6340.05
D4	3	38378.1	7209.29	23855.2	122451	5221.49
D5	3	41302.8	7234.62	25103.5	126135	3433.16
D6	3	44506.3	8161.53	24867.8	120102	4895.74
D7	3	29131.9	4994.23	22580.7	114777	3000.17
D8	3	31251.8	6542.61	25211.3	127670	3528.96
D9	3	37726.3	9952.52	24765.9	122335	4539.54
D10	3	57843.1	10944.9	24646.1	127621	4903.79
D11	3	60599.9	13082.5	23236.7	129965	3479.02
D12	3	150327	21145.8	27862.6	141985	7185.47
E1	3	54274.8	10388	21429.1	130352	4523.73
E2	3	41537.9	6851.62	22050.7	124276	4112.23
E3	3	71653.6	9743.57	26287	134897	7700
E4	3	41632.7	8399.48	25837.2	132572	4051.02
E5	3	34347.5	6044.55	24510.3	126086	3683.28
E6	3	172808	27877.8	36876.8	140614	15443.2
E7	3	47605.6	9023.34	25654	121934	8006.17
E8	3	37440.8	7502.22	25638.1	126052	5272.59
E9	3	40247.2	10161.8	28427.9	128965	3913.27
E10	3	50533.8	10407	23982.1	126490	4750.32
E11	3	48359.2	9395.4	22199.8	124872	5597.34
E12	3	62575.7	11838.4	22489.8	133543	5558.64
F1	3	46811.4	8743.46	23638.9	140428	9322.78
F2	3	44084.1	7035.19	22958.5	133447	3320.25
F3	3	34104.2	5760.67	24022.3	135053	3094.87
F4	3	38009.5	6502.26	24956.2	132082	3408.15
F5	3	35813.1	6326.62	25161.1	132505	2858.35
F6	3	62864	11971.2	30228.9	138885	6744.64
F7	3	31657.2	5633	25753.6	132275	4193.15
F8	3	33924.8	5913.13	24315.2	126293	3207.26
F9	3	37361.9	7224.02	24319.6	128445	4560.24
F10	3	43687.4	8406.66	22910.4	128390	4465.8
F11	3	41803.9	8066.83	21859.8	130214	2912.24
F12	3	66081.6	13214.3	24671.3	141660	7415.92
G1	3	39528	5935.3	21149.2	139362	3722.08
G2	3	48966.2	7713.5	24010.3	142910	3834.29
G3	3	35732.5	6148.97	23539.4	135689	3471.49
G4	3	30536.9	4852.66	23454.2	132477	2694.51
G5	3	28630.8	4536.49	24223.4	132114	2981.06
G6	3	30057.1	5234.52	24755.7	131426	2607.98
G7	3	27833.1	4965.3	23328.9	124187	2851.16
G8	3	33313.9	6182.65	24721.5	131830	4869.43
G9	3	37423.2	6164.34	23510.1	127675	3421.68
G10	3	49915.1	9238.37	23904.9	127167	3896.55
G11	3	68477.9	11467.7	24569.6	132453	7828.05
G12	3	41426.9	6570.07	22448.8	148255	3560.06
H1	3	54818.6	8800.76	23626.6	154263	8837.93
H2	3	39432.1	6697.44	23790.1	154408	3749.9
H3	3	35758.9	6516.85	24397.9	144501	4890.68
H4	3	33414.9	6113.94	24881.4	142926	3027.06
H5	3	32402.1	5668.02	24811.4	139799	3028.9
H6	3	38648.6	6428.59	23685.9	127919	4501.4
H7	3	31128.7	6906.05	4291.97	6188.57	3277.41
H8	3	31544.7	5210.54	3353.95	5955.18	3448.77
H9	3	34523.4	5151.5	3495.93	5679.46	2927.71
H10	3	42521	9582.48	7082.74	9724.5	6212.88
H11	3	39602.7	6572.38	4097.92	6232.06	3514.6
H12	3	43576	5343.09	3394.5	5563.82	3388.73
A1	4	19792.1	3715.78	14044.9	100675	3245
A2	4	35054.8	5296.96	19119.3	125946	3404.57
A3	4	31353.7	5113.01	20622	126270	3038.28
A4	4	38970.9	6593.58	20588.3	118271	2805.26
A5	4	39604.3	7001.22	21930.5	124118	3470.3
A6	4	47975.8	9503.64	24696.2	129228	5020.86
A7	4	45815.5	8812.16	23600.2	127882	5082.86
A8	4	206491	34333.2	75311.3	382263	21271.6
A9	4	45038.2	10609.4	24173	132217	4009.14
A10	4	42732.6	8913.21	21462.2	131374	4388.67
A11	4	44048.5	8222	20381.1	136221	3327.75
A12	4	52441.7	9880.19	19818.9	137172	4392.16
B1	4	35834.5	6083.57	19777.8	130812	3608.42
B2	4	43779.8	7248.98	22390.2	135126	4461.99
B3	4	33785.5	7189.56	23245.8	130915	3682.69
B4	4	37166.7	6362.7	22587.5	126196	3984.65
B5	4	39997.2	6226.58	25583.9	146859	4120.98
B6	4	32592.6	5535.19	23159	125174	2573.96
B7	4	32204.7	5573.57	24355.6	131352	3302.04
B8	4	120890	19026.4	75762.4	424473	12544.1
B9	4	42720.7	8044.92	25297	138186	3851.73
B10	4	55364.4	10162.8	24387.2	139178	4055.77
B11	4	58675.5	11006	23757.7	143263	5278.09
B12	4	92704	17123.4	25993.9	152579	8215.73
C1	4	38987.3	6456.63	20613.1	130161	3599.92
C2	4	46409.3	7714.35	28198.3	172605	5402.92
C3	4	37509.8	5672.39	23143.8	130540	3517.81
C4	4	37433.8	6147.88	23023.1	124537	3552.44
C5	4	38192.1	6552.69	24339.7	126294	3320.1
C6	4	42833.8	5838.55	23194.4	121436	2182.53
C7	4	33888.7	5933.25	24698.5	127441	2809.97
C8	4	38560.5	6493.5	25375.6	130751	3399.3
C9	4	49826.9	9945.34	25889.9	128693	4893.93
C10	4	48196.5	9813.17	24124.9	133374	3861.61
C11	4	44774	9360.3	22036.6	131317	2986.35
C12	4	56902.7	10653.1	21959.6	139170	3480.45
D1	4	42356.2	6765.62	21389	132926	3312.38
D2	4	34947.8	5636.49	22228.2	130295	3094.62
D3	4	47238.3	8557.58	25594.3	132620	6162.04
D4	4	38486.8	7143.84	23616.8	122585	5112.58
D5	4	41630.7	7528.46	25165.2	125928	3836.59
D6	4	44294.1	8100.19	24611.8	120043	5117.73
D7	4	28937.5	5028.77	22722.3	114645	2908.15
D8	4	31596.5	6520.5	25121.8	127724	3060.92
D9	4	37599.3	9900.36	24651.8	121862	3977.12
D10	4	57584.4	10937.4	24503.4	127651	4748
D11	4	60490.9	13463	23492.3	129846	3574.94
D12	4	152373	21536.8	27982.8	141934	7303.72
E1	4	55233.2	10527	21285.1	130637	4517.44
E2	4	42000.2	7069.35	21896.8	124794	4126.83
E3	4	71203.3	9712.9	26444.6	134864	7902.31
E4	4	41468.7	8347.89	25615.3	133024	3925.19
E5	4	34344.3	6180.78	24590.5	125971	3580.21
E6	4	171514	27655	36739.4	140337	15079.3
E7	4	47330.6	8617.04	25735.9	121666	8018.48
E8	4	37137.2	7359.63	25710.7	126173	4974.12
E9	4	40439.3	9953.88	28262.8	129110	4062.88
E10	4	50269.2	10323.5	24057.9	126315	4541.91
E11	4	48560.8	9523.56	22192.2	124730	5820.05
E12	4	63097.2	11746.4	22532.1	133457	5469.93
F1	4	47011.7	8692	23713.5	140738	9067.61
F2	4	44710	7240.72	22970.7	133808	3421.42
F3	4	34165.9	5817.93	24092.2	135518	3275.97
F4	4	38191.8	6665.63	24938.3	132282	3438.59
F5	4	35525.6	6081.27	25413.9	132600	2776.95
F6	4	62560.6	11779.2	30035.8	138913	6875.38
F7	4	31537.8	5664.96	25646.4	131891	4365.46
F8	4	33663.3	5921.73	24232	126248	3089.33
F9	4	37184.2	7185.4	24202.1	128473	4271.82
F10	4	43556.6	8431.31	23159.7	128257	4404.65
F11	4	41928	7749.91	21716.3	130221	3072.43
F12	4	66493.8	13378.1	24634.5	141770	7142.85
G1	4	38732.6	6226.99	21031.2	139066	4008.2
G2	4	48773.1	7804.58	23992.7	142677	3680.05
G3	4	35772.9	6072.64	23621.6	135445	3551.19
G4	4	30571.3	4608.17	23666.8	132548	2605.48
G5	4	28368.9	4539.59	24213.3	131851	3012.62
G6	4	29823.4	5147.37	24833.4	131292	2771.77
G7	4	27677.3	4658.41	23329.7	124711	2768.8
G8	4	33151.9	6167.09	24853	132121	4830.42
G9	4	37558	6078.64	23460.2	127974	3374.38
G10	4	50424.3	9264.34	23933.6	127437	4143.8
G11	4	68888	11530.8	24631.6	132612	8317.3
G12	4	41377.4	6618.61	22472.7	148091	3539.53
H1	4	54683.7	9005.43	23610.9	154653	8278.39
H2	4	39509.9	6366.08	23888.3	154418	4002.35
H3	4	35772.9	6579.98	24180.3	144229	4950.77
H4	4	33950.7	6013.33	25020.3	142736	3207.32
H5	4	32632.6	5637.86	24829.2	139786	3086.7
H6	4	38896.6	6476.61	23659.6	127795	4298.73
H7	4	31158.7	7003.58	4264.74	6033.39	3633.81
H8	4	31840.2	5158.8	3446.3	5826.27	3532.38
H9	4	34673.3	5442.41	3543.36	5868.46	3229.58
H10	4	42426.5	9639.91	7009.46	9580.3	5787.6
H11	4	39722.1	6494.2	4041	6110.44	3590.17
H12	4	43992.5	5679.16	3581.88	5487.33	3353.43
A1	5	19912.4	4025.57	13982.1	100863	3330.05
A2	5	34834.5	5484.81	19217.4	125643	3754.71
A3	5	31378.2	5334.7	20485.2	126679	3353.36
A4	5	39145	6451.84	20492.5	118457	3162.12
A5	5	39909.9	6680.04	21891.1	124213	3376.99
A6	5	48161.8	9624.53	24734.9	129570	4856.6
A7	5	45563.8	8699.53	23635.5	128437	4710.62
A8	5	206755	33960.4	75331.7	382895	21507.6
A9	5	44945	10736.5	24321.6	132105	3893.43
A10	5	42408.7	9051.81	21417.4	131129	4754.48
A11	5	43294.1	8510.55	20576.6	136183	3310.33
A12	5	52483.7	10100.4	19788.3	136851	4695.01
B1	5	36236.1	5784.48	19792.3	130375	3708.23
B2	5	43707.6	7164.22	22285.5	135347	4028.04
B3	5	33770.4	7326.27	23065.3	131068	3853.78
B4	5	37349.3	6406.89	22631.1	126533	3980.34
B5	5	40252.6	6689.89	25738.1	146508	4158.39
B6	5	32652.7	5359.93	23030.6	125624	2819.66
B7	5	32282.5	5378.63	24103.8	131429	3318.9
B8	5	121055	19824.8	75883.4	423140	11136.1
B9	5	42547.3	7850.47	25109	138152	3796.46
B10	5	55029.7	10177.6	24471.6	139623	4059.72
B11	5	58712.6	10970.9	23904.8	142555	5046
B12	5	94283.1	17314.9	26137.6	152344	7931.8
C1	5	39186.3	6513.08	20646.6	130106	3777.11
C2	5	46627.2	7038.73	28399.7	172834	5867.34
C3	5	37363.8	5642.32	23187.9	130466	3263.57
C4	5	37818.8	6344.01	23187.1	124210	3702.53
C5	5	38143.9	6604.08	24210.6	126085	3732.35
C6	5	42376.8	5901.68	23190	121644	2402.86
C7	5	33551.5	6166.67	24653.5	127374	2799.25
C8	5	38515.3	6503.88	25343.8	130507	3582.66
C9	5	49479.6	10059.3	25900.8	128579	4587.89
C10	5	48111.5	9747.6	24186.9	133196	4173.88
C11	5	44868.2	9335.16	22106.4	131359	2606.43
C12	5	57560	10852.7	22198.1	139046	3730.58
D1	5	42199.5	6983.73	21617.9	133021	3407.59
D2	5	34788.9	5486.74	22089.3	130385	3185.45
D3	5	47545.2	8534.4	25578.4	132532	6369.55
D4	5	37972	6797.13	23855.2	122675	5159.1
D5	5	40925.6	7742.94	25048.7	126012	3492.08
D6	5	44535.9	8158.94	24855.9	120081	5069.51
D7	5	28838	5179.01	22560.6	114236	3015.66
D8	5	31468.6	6354.23	25244.8	127560	3299.6
D9	5	37177	9683.77	24605.4	121869	4235.38
D10	5	57563	10787.3	24459.3	127623	5040.22
D11	5	61604.2	13323	23478.9	129926	3623.94
D12	5	153398	21911.2	28181.4	141952	7607.79
E1	5	55541.9	11110.5	21270.9	130488	4754.48
E2	5	42182.2	7213.43	21930.5	124440	3950.58
E3	5	71105.2	9585.56	26232	135215	7617.19
E4	5	40983.3	8124.63	25784	132820	3944.91
E5	5	33892	6189.62	24427.3	125904	3414.72
E6	5	170883	27691.2	36502	140207	15214.1
E7	5	47058.8	8856.36	25573.9	121755	7942.75
E8	5	37048.3	7435.44	25349.6	126078	5062.42
E9	5	40118.4	9905.43	28269.2	129212	4188.18
E10	5	50123.3	10167.1	23921.6	126303	4509.78
E11	5	48425.8	9593.91	22441.9	124939	6125.91
E12	5	63022.2	11840.9	22644.4	133308	5459.16
F1	5	47195.8	8634.82	23744.9	140384	9398.06
F2	5	45079.9	7253.3	22814.1	133477	3347.84
F3	5	34393.9	5809.88	24086	135208	2966.93
F4	5	38343.2	6560.91	24862.5	132381	3600.35
F5	5	35352.7	6233.5	25240.9	132401	2531.05
F6	5	62692.9	11849.5	30145.6	139058	6827.55
F7	5	31709.7	5515.3	25793.9	132015	3917.79
F8	5	33682.4	6002.3	24222.3	126096	3255.92
F9	5	37056.1	7182.99	24373.4	128312	4308.41
F10	5	43593.5	8489.1	22978.9	128553	4453.57
F11	5	41912.5	7999.42	21805.4	130454	2660.51
F12	5	67002.3	13517.1	24639.4	141836	7068.38
G1	5	39449	6033.94	20955.9	139289	3914.12
G2	5	49285.8	7785.65	24036.9	142922	3618.79
G3	5	36263.7	6058.09	23695.9	136073	3472.37
G4	5	30547.1	4886.55	23657.2	132585	2826.01
G5	5	28425.7	4639.47	24205.5	132032	2740.46
G6	5	29942.6	5256.12	24745.4	131367	2757.63
G7	5	27801.9	5087.45	23287.5	124513	2655.07
G8	5	33189.5	6190.02	24887.1	132068	4619.3
G9	5	37561.4	6141.2	23533.3	127754	3433.94
G10	5	50609.6	9241.06	23933.6	127429	4235.38
G11	5	69212.4	11522.9	24633.8	133162	7982.78
G12	5	41549.9	6554.3	22419.2	148254	3441.43
H1	5	54481.3	8950.26	23569.9	153932	8817.78
H2	5	38877.6	6666.86	23922.3	154673	4383.91
H3	5	35852.7	6712.78	24319.9	144086	5039.88
H4	5	33904.5	6050.44	25068.2	142542	3146.42
H5	5	32825.2	5816.54	24886.2	140084	3329.16
H6	5	39042	6581.02	23677.6	127636	4545.75
H7	5	31149.7	6798.31	4403.22	5851.83	3429.02
H8	5	31717.8	5059.51	3357.42	5836.84	3540.95
H9	5	34797.2	5197.94	3372.62	5502.72	2936.46
H10	5	42229.4	9429.36	6958.65	9551.26	6045.56
H11	5	39965.8	6434.42	4079.31	6036.11	3656.72
H12	5	43739.6	5696.93	3477.33	5399.51	3227.76
A1	6	19564.8	4012.17	14007.2	100445	3472.77
A2	6	35020.9	5335.82	19035.1	125888	3826.68
A3	6	32021.6	5252.27	20553.6	126375	2923.25
A4	6	38933.8	6433.4	20413.7	118112	3116.72
A5	6	40011.3	6762.39	22009.2	124437	3623.53
A6	6	47861.3	9598.48	24720.9	129478	4856.6
A7	6	46066.1	8953.67	23753	128186	4797.54
A8	6	206722	35204	75573.6	383768	22494.5
A9	6	45280	10892.1	24286	131836	4124.84
A10	6	42954.3	8897.31	21468.9	131027	4682.65
A11	6	43385.7	8295.03	20613.6	135505	3347.5
A12	6	53094.7	9834.06	19766	137237	4965.17
B1	6	36576.1	5882.18	19637.6	130283	3784.36
B2	6	43586.2	7412.55	22529	135520	4316.03
B3	6	33745.8	6973.63	23151.2	131143	3552.89
B4	6	36869.4	6240.34	22521	125949	3981.42
B5	6	39383.1	6402.21	25646.3	146639	4448.01
B6	6	32436.5	5491.83	23002.4	125341	2734.44
B7	6	31874.2	5688.08	24185.3	131260	3354.41
B8	6	120528	19045.3	76105.8	423417	12076.8
B9	6	42517.6	7961.85	25254.9	137993	3717.26
B10	6	55340.9	10099.6	24347.5	138762	4111.06
B11	6	58653.7	10947.6	23909.4	143027	5124.51
B12	6	95266.6	17476.2	26123.8	152577	8664.12
C1	6	39385.4	6601.42	20751.4	130475	4147.2
C2	6	46352.7	7617.35	28313.4	172805	5248.11
C3	6	37338.3	5687.42	23088	130598	3138.69
C4	6	37417.9	6294.44	23203.7	124509	3198.28
C5	6	38042.7	6322.45	24270.5	126052	3745.39
C6	6	42545.2	5823.6	23366.4	121883	2668.98
C7	6	33567.7	5929.28	24795.4	127164	2978.17
C8	6	38177.6	6664.04	25355.6	130648	3548.51
C9	6	49571.3	10104.5	25774.2	128740	4407.87
C10	6	48092.7	9645.82	24221.9	133511	4059.52
C11	6	45108.8	9301.27	22264.4	131476	3044.89
C12	6	57702.5	10568.8	21892.8	138986	3548.02
D1	6	42557.1	6889.95	21522.9	132750	3588.41
D2	6	34547.7	5498.26	22385	130340	3684.44
D3	6	47158	8404.81	25702.1	132221	6237.88
D4	6	37932.6	6840.08	23930.4	122271	4772.09
D5	6	41011.8	7577.59	25115.4	125286	3372.25
D6	6	44381.4	8070.82	24706.9	119609	5216.9
D7	6	28807.5	5069.35	22592.6	114454	3099.48
D8	6	31174.6	6486.01	25003.5	127423	2961.15
D9	6	36932.3	9755.38	24722.3	121446	4177.99
D10	6	57353.5	10753.5	24639.4	127593	4781.87
D11	6	61374.6	13517.9	23328.5	130299	3687.53
D12	6	155092	21992.2	28434	142656	7319.62
E1	6	56537.5	11486.1	21465.1	130366	4402.07
E2	6	42113.4	6853.79	22036	124482	4081.99
E3	6	71179.2	9770.53	26405.4	134826	7861.85
E4	6	40750	8173.55	25683.2	132983	4110.18
E5	6	33964.9	5925.12	24359.1	125691	3601.96
E6	6	170244	27361.4	36502.9	139981	15352.5
E7	6	47081.5	8803.67	25540	121294	8178.47
E8	6	36963.4	7295.56	25600.4	125934	5378.16
E9	6	40059.3	10116.8	28361.7	128869	4264.85
E10	6	50217.6	10367.9	24206	126543	4713.6
E11	6	48220.3	9658.47	22371.1	125333	6129.74
E12	6	63566.9	12038.2	22662.3	133209	5362.16
F1	6	47151.2	9057.92	23765.8	140570	9163.3
F2	6	45514.5	7481.9	23048.4	133609	3609.46
F3	6	34266	5881.45	24203.8	135284	3353.46
F4	6	38160.1	6763.66	24853.1	132238	3485.55
F5	6	35562.5	6211.64	25261.7	132335	2693
F6	6	62268.3	11914.5	29980.5	139020	7039.59
F7	6	31572.3	5691.46	25769	131823	4176.66
F8	6	33630.3	5804.39	24281.3	125933	3030.77
F9	6	36733	7101.72	24315.5	128314	4397.74
F10	6	43412.4	8560.5	23038	128476	4348.74
F11	6	42240.4	7784.12	21770.8	130317	2890.35
F12	6	66848.4	13450.2	24764.7	141743	7487.08
G1	6	39155.2	5998.71	21046.7	138523	3908.96
G2	6	49151.1	8312.03	24149.6	143228	3723.81
G3	6	36226.8	6238.04	23628.7	135975	3523.74
G4	6	30547.1	4780.04	23605	132534	2660.21
G5	6	28589.5	4477.65	24293.5	132285	2701.81
G6	6	30014.5	5196.34	24752	131339	2708.49
G7	6	27852.2	4639.56	23349.6	124444	3222.95
G8	6	33248.6	6069.64	24939.5	132062	4402.24
G9	6	37503.7	6155.77	23576.3	127968	3758.94
G10	6	50707.9	9344.94	24001.7	127240	4379.15
G11	6	69179.9	11851.7	24643.6	132928	8505.81
G12	6	41318.6	6747.22	22535.3	148288	3655.88
H1	6	55003.7	8920.01	23558.9	154664	8110.99
H2	6	38998.5	6554.7	23894.2	154139	4138.37
H3	6	35600.4	6612.64	24257.3	143900	4880.31
H4	6	33928.8	5863.25	25029.8	142707	3245.48
H5	6	32676.5	5714.76	24945.4	139866	3122.73
H6	6	39110.2	6340.18	23748.9	127887	4750.71
H7	6	31314.4	6828.19	4327.76	5866.57	3653.65
H8	6	31884.2	5104.96	3444.22	5908.69	3445.19
H9	6	34803.2	5188.3	3451.96	5747.71	3071.2
H10	6	42122.8	9837.36	7005.55	9859.69	5887.2
H11	6	39772.8	6152.77	4170.16	6022.6	3697.32
H12	6	44020.6	5508.9	3651.12	5695.55	3343.54
A1	7	19335.6	4084.18	14059.1	100382	3302.66
A2	7	34828.9	5573.87	19461	125984	3379.65
A3	7	31559	5205.38	20784.8	126660	3025.77
A4	7	39066.9	6520.98	20410.3	118639	3045.98
A5	7	39796	6885.92	21988.5	123862	3464.41
A6	7	47710.5	9724.58	24795.1	129491	5098.28
A7	7	46007.2	8915.17	23789.2	128359	4670.94
A8	7	208269	34671.8	75617.3	382543	22650.9
A9	7	45306.5	10917.5	24228	131839	4065.51
A10	7	42744.4	8999.55	21434.2	131124	4378.72
A11	7	43875.3	8125.01	20452.8	135598	3762.16
A12	7	53291.7	9862.33	19717.3	137028	5198.36
B1	7	36486.2	5971.91	19492	130209	3799.58
B2	7	43678.1	7064.59	22404.4	135398	4279.54
B3	7	33748.5	6914.86	23485.7	131296	3705.11
B4	7	36649.4	6349.11	22352.3	126399	3843.38
B5	7	39827.7	6794.4	25782.8	146657	4035.31
B6	7	32747.8	5377.1	23095.2	125097	2693.64
B7	7	31935.7	5498.39	24284.1	131398	3214.16
B8	7	120301	18977.8	75793.3	421631	11979
B9	7	42170.9	7908.89	25293.3	137952	4006.46
B10	7	55421.1	10142	24209.4	139662	4251.26
B11	7	58653.7	11030.5	23835.9	142342	5664.91
B12	7	95552.2	17605.8	26274.4	152242	8467.33
C1	7	39798.6	6427.18	20806.7	130544	4178.6
C2	7	46627.2	7510.13	28538.4	172757	5154.54
C3	7	37528.4	5428.38	23216.9	130766	3113.94
C4	7	37228.6	6313.83	23046.4	124471	3686.33
C5	7	38107.3	6480.56	24206.4	125860	3869.77
C6	7	42459.4	5764.62	23404.9	122292	2303.5
C7	7	33403.4	5720.47	24777.9	127172	3041.66
C8	7	38232.1	6425.97	25299.4	130472	3316.61
C9	7	49154.4	9859.24	25933.4	128630	4778.72
C10	7	47986	9590.04	24071	133470	4255.43
C11	7	45032.8	9406.21	22281.8	131304	2744.48
C12	7	57461.2	10432.2	22235	139429	3623.89
D1	7	42425.7	7114.38	21496.9	133069	3505.7
D2	7	35018.6	5680.27	22450	130478	3717.27
D3	7	46857.2	8459.6	25542.4	132679	6135.71
D4	7	38179.9	7096.79	23841.4	122675	5131.61
D5	7	41191.1	7436.81	25096.5	125649	3467.11
D6	7	44351.8	7902.35	24784.6	119542	5585.38
D7	7	28979.3	5046.9	22599	114203	2924.55
D8	7	31159.6	6561.18	25164.7	127462	3245.52
D9	7	37135	9660.79	24503.3	121482	4348.24
D10	7	57673.4	10726.4	24489	127648	4769.29
D11	7	61818	13688	23426.4	130174	3542.62
D12	7	155846	22162.8	28426.4	142657	7511.4
E1	7	56638.4	11471.2	21428	130460	4382.14
E2	7	42473.1	7229.68	22156.1	124661	4237.38
E3	7	70795.7	9645.05	26556.5	135231	7429
E4	7	40806.3	8241.15	25740	132734	3734.57
E5	7	34230	6051.62	24294.6	125940	3540.49
E6	7	169926	27499.5	36442.9	139845	15211.3
E7	7	47199.2	8802.78	25507	121611	7968.31
E8	7	37196.3	7357.83	25560.8	125911	5360.88
E9	7	39948.8	10337.1	28252.8	128988	4132.07
E10	7	50310.2	10279.1	24102.2	126545	4710.84
E11	7	48202.7	9543.8	22297.4	124866	6038.93
E12	7	63613.4	11927	22655.8	133102	5599.26
F1	7	47369.4	8826.36	23645.4	140652	9469.51
F2	7	45906.4	7470.37	23074.7	133816	3790.34
F3	7	34160.7	5999.54	24162.2	135682	3051.63
F4	7	38231.4	6906.92	24893.1	132525	3505.56
F5	7	35413.9	6260.22	25380.7	132697	2721.83
F6	7	62314.1	11727.8	30087.2	138908	6860.23
F7	7	31656.5	5610.4	25783.5	131759	4362.17
F8	7	33553.9	5837.25	24353.1	126065	2963.97
F9	7	36603.4	7169.31	24313	128379	4368.81
F10	7	43695.8	8351.41	22966.9	128377	4199.36
F11	7	41866	7770.03	21769.8	130210	3108.25
F12	7	67057.2	13349.8	24792.5	141386	7118.03
G1	7	39178.6	5976.16	21129.8	138967	3604.8
G2	7	49414.6	8073.09	24149.6	143504	3911.97
G3	7	36647.5	6223.5	23558	135856	3671.63
G4	7	30618.3	4788.11	23563.3	132398	2806.41
G5	7	28476.6	4476.1	24211	132124	2660.79
G6	7	30110.4	5241	24760.1	131238	2829.1
G7	7	27721.2	4871.8	23359.6	124226	2934.3
G8	7	33077.4	6163.82	24824.7	132050	4709.18
G9	7	37674.1	5890.11	23553.1	128151	3606.52
G10	7	51159.1	9353.89	23986.4	127342	3789.4
G11	7	69273.8	11478.9	24771	132815	8140.78
G12	7	41868.2	6447.53	22494.3	147879	3262.34
H1	7	54036	8772.29	23540	154431	8430.29
H2	7	38967.6	6513.92	23791.2	154240	4062.29
H3	7	35841.9	6574.54	24302.5	144196	4970.46
H4	7	33898.8	6207.13	25019.5	142462	3411.94
H5	7	32915.2	5891.93	24861	139972	3128.73
H6	7	39415.2	6683.91	23790.2	127723	4637.52
H7	7	31354.1	7164.02	4219.62	6096.24	3528.24
H8	7	31925.4	5032.24	3479.63	5909.4	3510.94
H9	7	34967.8	5239.12	3462.3	5914.83	3115.83
H10	7	42683.6	9477.71	7097.39	9553.26	5914.09
H11	7	39900.7	6662.05	4178.92	6524.85	3506.7
H12	7	43842.1	5785.75	3490.9	5950.51	3318.13
A1	8	19636.2	4008.82	14250.8	100357	2975.42
A2	8	35913.2	5504.24	19344.5	126277	3743.64
A3	8	31568.8	5344.64	20609.7	126375	3015.77
A4	8	38729	6391.92	20647.7	118568	3237.08
A5	8	39667.4	6575.03	21972.9	124045	3333.77
A6	8	47556.4	9848.6	24941.2	129921	5149.54
A7	8	46108.9	8661.02	23556.2	128058	5252.92
A8	8	209335	34486.9	75637.7	381950	22981.9
A9	8	45661.2	10690.8	24529.3	132281	4052.65
A10	8	42680.2	8643.98	21438.7	131080	4481.5
A11	8	43189.6	8419.55	20595.1	135707	3400.93
A12	8	53140.3	9734.37	19827.2	137061	4377.94
B1	8	36685.9	5852.27	19537.5	130142	3703.15
B2	8	43537	7376.86	22410	135493	4168.78
B3	8	33513.1	6712.98	23263.5	131330	3693.31
B4	8	36782.8	6533.78	22619.6	126268	3594.27
B5	8	39716.6	6464.7	25831.1	146407	4329.75
B6	8	32499.3	5445.76	23107.4	125286	2579.4
B7	8	31845.2	5414.47	24203.5	131194	3610.94
B8	8	119986	18878.1	75661	423726	11896.6
B9	8	42092.4	7947.24	25385.9	138292	3805.68
B10	8	54797.6	10159.8	24233.3	139604	4008.39
B11	8	58983.8	11064.3	23914	142908	5473.23
B12	8	96282.5	17444.5	26329.7	152500	8360.51
C1	8	39926.4	6440.68	20714.5	130489	3797.3
C2	8	46651.2	7726.26	28552	173112	5658.09
C3	8	37572.4	5689.73	23309.7	130466	3263.57
C4	8	37349.1	6162.97	23014.3	124281	3564.32
C5	8	38123.7	6490.44	24314.9	126061	3769.46
C6	8	42707.9	5777.08	23338.5	122677	2552.34
C7	8	33525.3	5847.5	24681	127240	2895.72
C8	8	38185.2	6596.51	25275.8	130340	3380.43
C9	8	49294.5	10028	25914.4	128799	4439.37
C10	8	48259.8	9817.09	24201.9	133362	4041.62
C11	8	44952.2	9175.57	22444.2	131572	2747.8
C12	8	57512.5	10653.1	22192.3	138619	3627.45
D1	8	42581.4	6774.04	21503.9	133208	3517.24
D2	8	34775	5562.77	22275.2	130605	3072.74
D3	8	47241.3	8450.11	25688.4	132757	6202.07
D4	8	38009.6	6928.04	23843.5	122655	5389.62
D5	8	41029.4	7278.08	24816.8	125526	3329.31
D6	8	44168.4	7764.12	24804.7	119655	5288.78
D7	8	28994.6	5068.49	22586.2	114272	2893.58
D8	8	31136.3	6335.66	25254.1	127299	3127.11
D9	8	37029.4	9331.93	24507	121743	4321.46
D10	8	57564	10977.7	24606.8	127275	4808.96
D11	8	62245.6	13852.8	23613.9	130257	3611.43
D12	8	156881	22337.4	28617.5	142426	7677.35
E1	8	56853.4	11629.7	21445.5	130411	5119.49
E2	8	42605.4	7344.5	22128.7	124714	4178.98
E3	8	70744.9	9749.15	26336.4	135140	7342.43
E4	8	40885.4	8097.94	25776.7	133202	4130.84
E5	8	33994.1	6015.35	24474.3	125547	3478.08
E6	8	169619	27519.4	36406.5	139806	15197.5
E7	8	47129.4	8705.45	25498.5	121519	8196.46
E8	8	36931	7154.77	25454.3	125652	5097.93
E9	8	39752.6	10131.8	28409.7	128942	3726.25
E10	8	49971.3	10262.2	24165.4	126579	4738.39
E11	8	48452.2	9512.96	22436.2	125309	6355.31
E12	8	63809.9	12036.5	22669.6	132832	5637.4
F1	8	46912.3	8762.04	23951.6	140601	9496.3
F2	8	46096.5	7254.35	23076.7	134197	3486.83
F3	8	34333	5963.76	24348.2	135712	3265.16
F4	8	38179.1	6880.11	24873.5	132891	3436.85
F5	8	35329.3	6297.47	25350.7	132933	2926.18
F6	8	62328.6	11693.8	29996	138897	6884.14
F7	8	31465.9	5580.78	25635.1	132063	4360.52
F8	8	33679.5	5873.23	24278.1	126082	3376.32
F9	8	36461.8	7053.44	24373.4	128657	4408.8
F10	8	43462.7	8365.86	23015.8	128463	4114.62
F11	8	42433.8	7716.71	21715.3	130310	3090.34
F12	8	67206.6	13525.7	24788.4	141578	7297.59
G1	8	39070.4	5960.66	20948.2	139227	3725.95
G2	8	49631.6	7642.52	24126.4	143054	3884.62
G3	8	36482.1	6298.02	23804.6	136162	3438.72
G4	8	30592.5	4867.18	23624.3	132406	2638.15
G5	8	28451.5	4542.69	24382.2	132344	2997.63
G6	8	30083.8	5213.63	24896.4	131542	2799.32
G7	8	27691.5	4623.72	23352.7	124325	2761.74
G8	8	33026.7	6025.42	25026	131957	4558.25
G9	8	37501.2	6121.49	23430.1	128149	3646.81
G10	8	50910.7	9535.69	24085	127332	4355.34
G11	8	69382.7	11942.9	24866.9	132902	8002.39
G12	8	41591.4	6250.97	22617.3	147775	3736.87
H1	8	54344.4	9144.25	23839.4	154063	8469.04
H2	8	39116.6	6657.94	24021.7	154113	4442.7
H3	8	35565.9	6505.96	24381.5	144081	5091.69
H4	8	34288.6	6123.01	25148.8	142722	3367.28
H5	8	32878.8	5795.43	24976.5	139895	3124.98
H6	8	39828.9	6521.57	23765.4	127664	4663.52
H7	8	31319.6	7058.63	4356.54	6044.25	3277.41
H8	8	31821.9	5094.47	3416.44	5967.16	3327.99
H9	8	34739.1	5399.48	3512.32	5714.46	3038.83
H10	8	42400.1	9619.76	7006.53	9513.21	6105.31
H11	8	40392.8	6325.21	4071.65	6262.46	3489.78
H12	8	44040.4	5821.29	3501.77	5713.96	3006.08
A1	9	19942.4	3841.37	13977.3	100082	3739.46
A2	9	34906.1	5520.43	19088.7	125778	3389.34
A3	9	32290.4	5104.48	20672.6	126431	2942
A4	9	39525.2	6472.58	20564.4	118597	3275.09
A5	9	39942.6	6724.3	21968.8	124144	3620.58
A6	9	47933.9	9928.85	24906.8	129921	4843
A7	9	45831.5	8803.5	23642.3	128092	4717.23
A8	9	208571	34301.9	75719.3	382833	22785.7
A9	9	45657.7	10803.7	24468.2	132168	3922.11
A10	9	42695.9	8888.22	21556.2	131018	4821.9
A11	9	43086.6	8160.93	20439	135363	3198.83
A12	9	53009	9970.95	19686.7	136736	4993.61
B1	9	36075.9	5473.42	19544.8	130562	4104.09
B2	9	43671.5	7179.09	22489.3	135717	4613.15
B3	9	33626.7	7008.13	23465.5	131311	3854.96
B4	9	36801.5	6088.53	22555.4	126340	4150.72
B5	9	39888.3	6403.29	25871.1	146847	4235.62
B6	9	32300.7	5369.87	23177.7	125385	2758.01
B7	9	31938.5	5330.55	24211.6	131366	3163.56
B8	9	120513	19137	75756.7	422906	11502.6
B9	9	42207.3	7855.94	25304.5	138127	3731.99
B10	9	55063.9	10219.1	24350.5	139273	4196.96
B11	9	58898.1	11125	23847.4	142705	5405.1
B12	9	96827.8	17726.7	26405.7	152630	8572.75
C1	9	39404.2	6656.64	20788.2	130938	4028.32
C2	9	46656.4	7282.09	28629.8	173317	5600.25
C3	9	37327.9	5474.63	23438.6	131138	3143.19
C4	9	37299.4	6228.7	23088.5	124939	3310.57
C5	9	37915.5	6443.99	24282.9	125820	3884.81
C6	9	42438.5	5689.86	23533.2	123256	2437.42
C7	9	33423.5	5708.56	24734.5	127096	2632.7
C8	9	38094.8	6400	25279.4	130443	3459.52
C9	9	49228.3	9989.69	25859.2	128895	4523.98
C10	9	48388.3	9783.81	24300.8	133967	4017.75
C11	9	45013.5	9500.22	22274.2	131537	2597.6
C12	9	57705.1	10649.5	22123.2	139313	3859.79
D1	9	42533.9	6819.35	21748.8	133245	3451.84
D2	9	35018.6	5346.2	22452.2	130918	3453.55
D3	9	47110.2	8680.86	25624.9	132902	6010.36
D4	9	38080.8	6899.4	23847.8	122679	5076.63
D5	9	41069.8	7400.91	25029.8	125593	3590.94
D6	9	44119.6	8035.39	24706	120111	5542.62
D7	9	28422.8	5095.25	22647.4	114363	3080.35
D8	9	30883	6459.47	25257.9	127367	3088.89
D9	9	36863.1	9628.96	24637.9	122090	4546.24
D10	9	57209.8	10901.7	24842.5	127901	4856.37
D11	9	62259.3	14100.6	23452.1	130148	3513.43
D12	9	157705	22204.8	28714	142540	7578.97
E1	9	57696.5	11652.6	21456.4	130456	4892.93
E2	9	42456.2	7369.42	22051.8	125361	4156.04
E3	9	70876.9	9400.6	26358.8	135202	7626.6
E4	9	40787.5	8233.15	25830.8	133055	3942.09
E5	9	33997.3	6033.93	24432.8	126127	3634.11
E6	9	169462	27305.2	36522	139662	15223.2
E7	9	46722.1	8569.72	25705.8	121372	7659.69
E8	9	37068.2	7061.82	25458	125986	4941.5
E9	9	39670.3	10156.5	28344.4	128952	4063.81
E10	9	49975.7	10238.2	24143.7	126645	4881.61
E11	9	48208.6	9655.58	22575.9	125042	5995.92
E12	9	63837.5	12014.8	22715.2	133174	5393.66
F1	9	47109.7	8647.69	23624.5	140981	9551.16
F2	9	46348.3	7429.47	23279.7	134195	3802.6
F3	9	34132	5771.41	24265	135799	3491.31
F4	9	38344	6512.31	25060.1	132871	3604.7
F5	9	35532.4	6081.27	25352.4	132814	2769.32
F6	9	62247.6	11862.4	30073.1	139174	6894.51
F7	9	31448.6	5616.63	25706.1	132057	4092.57
F8	9	33230	5810.65	24303.1	126034	2883.15
F9	9	36652.4	7120.22	24315.5	128333	4431.77
F10	9	43582.6	8348.86	22946.4	128498	4640.52
F11	9	41933.2	7715.7	21789.6	130757	2816.72
F12	9	67454.8	13474.2	24962	141676	7519.36
G1	9	39437.3	6135.4	21179.1	138932	3921.85
G2	9	49524.3	8038.78	24133	143325	4150.45
G3	9	36686.2	6221.68	23905.4	135912	3438.72
G4	9	30621.5	4856.69	23662.8	132750	2602.22
G5	9	28675.8	4516.36	24444.5	132343	2971.6
G6	9	30007.8	5264.76	24800.4	131511	2895.36
G7	9	27944.2	4718.73	23363.4	124208	2731.94
G8	9	33161.1	6131.88	24962	132280	4721.05
G9	9	37541	6223.48	23441.3	128155	3669.59
G10	9	50980	9436.28	23954.2	127547	4263.76
G11	9	69505.5	11823.6	24852.7	132915	8406.65
G12	9	41437.6	6585.85	22509.1	148540	3191.62
H1	9	54435	8813.22	23680.2	154128	8163.69
H2	9	39120.6	6440	23953.8	154565	3991.97
H3	9	35446.2	6484.19	24377.4	144348	4929.01
H4	9	34313.8	5975.4	25208.6	142896	3470.4
H5	9	33056.5	5931.89	24946.9	139961	2996.62
H6	9	39642.3	6711.34	23787.2	128174	4649.76
H7	9	31274	6807.75	4376.77	6058.22	3582.22
H8	9	31715.1	5348.29	3504.63	5986.18	3575.97
H9	9	34717.5	5183.04	3454.54	5782.71	2946.96
H10	9	42727.3	9612.71	6965.49	9702.47	6071.45
H11	9	40189	6317.16	4297.12	6363.82	3453.69
H12	9	43891.7	5544.44	3383.64	5518.49	3426.85
A1	10	19711.3	4062.41	13960	100093	3550.61
A2	10	35233.6	5492.9	19381.3	126156	3652.3
A3	10	31899.5	5633.12	20527.6	126803	2545.65
A4	10	38798.1	6470.28	20533.6	118544	2979.47
A5	10	40288.7	6672.83	21958.4	124010	3376
A6	10	47817.3	9809	24987.4	130716	5359.84
A7	10	46213.9	8781.36	23707	128127	5042.23
A8	10	209827	33618.9	75509.5	383327	22086.9
A9	10	45552.9	10766	24487.6	131882	3913.21
A10	10	42748.4	8743.95	21685	131094	4798.69
A11	10	43558.9	8346.52	20368.4	135279	3389.32
A12	10	53151.3	10174.8	19963.5	136717	4649.51
B1	10	36516.9	6284.96	19553.9	130648	4080.4
B2	10	44173.4	7711.43	22503.5	135711	3966.79
B3	10	33691	6891.86	23271.1	131234	3505.69
B4	10	36675.1	6226.75	22491.1	126567	3908.09
B5	10	39492	6411.91	25755.7	146717	3918.25
B6	10	32099.3	5415.04	23178.7	125064	2904.89
B7	10	32054.4	5445.07	24266.9	131166	3666.86
B8	10	119359	18619.1	75663.8	423397	11630.9
B9	10	41952.5	7897.94	25226.9	138376	4055.27
B10	10	55597.6	10174.6	24630.5	139603	3803.03
B11	10	58853.3	11098.2	23938.2	142922	5604.87
B12	10	96792.1	17384	26451.3	152757	8352.08
C1	10	39613.3	6765.84	20829.7	130909	3667.21
C2	10	46683.8	7430.15	28403	173271	5470.96
C3	10	37400.9	5686.26	23149.6	130914	3118.44
C4	10	37010.7	6394.66	23130.6	124605	3585.92
C5	10	37967.5	6409.41	24438.8	125995	3752.41
C6	10	42542.7	5851.84	23509.7	123448	2625.78
C7	10	33465.1	5857.82	24600.8	126749	2723.4
C8	10	37914	6354.12	25438.2	130535	3544.01
C9	10	49154.4	9908.81	25784.1	128480	4678.8
C10	10	48168.9	9818.07	24322.8	133935	4212.67
C11	10	45329	9236.78	22341.8	131659	2748.9
C12	10	57710.2	11156.7	22202.7	138889	3900.1
D1	10	42653.1	6938.42	21551.9	133141	3347.96
D2	10	35379.2	5554.7	22305.5	130546	3566.26
D3	10	46962.9	8598.67	25883	132775	5789.16
D4	10	37817.1	6884.06	23882.8	122942	5392.79
D5	10	40993.3	7627.67	24922.3	125478	3536.01
D6	10	44079.6	8128.7	24773.6	119902	4923.03
D7	10	28969.7	4889.75	22680.3	114109	3001.08
D8	10	30844	6403.76	25254.1	127626	3040.4
D9	10	36879	9542.33	24440.2	121693	4484.07
D10	10	57126.3	10630.7	24489	127705	4859.28
D11	10	62793.8	14216.7	23429.4	130575	3700.05
D12	10	158268	22434.9	28838.9	142820	7625.68
E1	10	57688.1	11669.9	21503.3	130645	4653.79
E2	10	42274.2	7484.24	22076	125105	4237.38
E3	10	70741.3	9379.22	26374.7	135216	7592.73
E4	10	40888.7	7996.54	25876.6	132956	4123.33
E5	10	33960.1	5943.7	24447.6	125793	3253.96
E6	10	169288	27348.4	36407.4	139683	15166.4
E7	10	46801.6	8730.45	25594.6	121322	7916.24
E8	10	36535.9	7065.43	25542.9	125854	5143.99
E9	10	39737.6	10099.2	28432.4	129044	3988.07
E10	10	50097.1	10291.5	24037.2	127057	4512.53
E11	10	48552.9	9673.89	22590.2	125302	6330.46
E12	10	64109	12235.4	22794.1	133079	5592.63
F1	10	47264	8689.14	23870.5	140711	9810.16
F2	10	46486.3	7537.48	23417.1	134074	3801.58
F3	10	34217.3	5856.4	24283.6	135826	3348.05
F4	10	38172	6845.76	25019.2	132626	3694.27
F5	10	35304.4	6230.26	25458.8	132650	2359.77
F6	10	62037.7	11740.7	30125.3	139022	6918.42
F7	10	31053.8	5477.89	25782.7	131824	4187.38
F8	10	33447.4	5689.4	24352.3	126164	3205.61
F9	10	36434.7	7192.64	24452	128621	4503.24
F10	10	43395.7	8259.62	22959.2	129035	4192.37
F11	10	42310.7	7629.18	21735.1	130911	2835.63
F12	10	67105.8	13628.6	24875.2	141803	7478.81
G1	10	39317.4	5966.3	20900.2	139254	4089.39
G2	10	49715	8077.82	24149.6	143485	3929.47
G3	10	36639.4	6213.5	23776.3	136143	3719.45
G4	10	30432.8	4776.01	23695.7	132515	2843.98
G5	10	28473.7	4742.45	24333.2	132380	3041.02
G6	10	30020.5	5218.67	24886.9	131419	3027.14
G7	10	27558.4	4742.11	23345.8	124376	2896.65
G8	10	33098.9	6184.29	24997.8	132067	4693.91
G9	10	37485.9	6039.22	23503.2	128008	3741.42
G10	10	50957.2	9337.77	23933.6	127526	4308.64
G11	10	69673.5	11740.2	24908.2	133022	8033.99
G12	10	41780	6454.81	22322.4	147837	3652.46
H1	10	54433.1	9007.21	23565.2	154129	8462.84
H2	10	39146.1	6655.39	23853.2	154005	3903.21
H3	10	35391.3	6630.05	24419.5	144612	5046.1
H4	10	34073.9	6145.28	25057	142920	3495.57
H5	10	33242.4	5784.87	24824	140178	3347.18
H6	10	39967.5	6494.9	23866.7	128016	4729.29
H7	10	31047.1	7063.35	4344.87	6002.35	3686.2
H8	10	31832.1	5142.72	3393.53	6098.18	3636
H9	10	34867.3	5238.25	3369.17	5859.71	2804.33
H10	10	42539.3	9726.54	7012.39	9636.38	5849.35
H11	10	39976.7	6451.67	4148.27	6386.34	3905.99
H12	10	44166	5757.63	3475.97	5531.24	3182.58
A1	11	19709.5	4082.5	14005.6	99974.8	3299.78
A2	11	35271.3	5570.63	19267.9	126055	4006.59
A3	11	31875	5316.22	20556.3	126794	2733.2
A4	11	39095.1	6425.34	20753.8	118243	3259.25
A5	11	40320.3	6872.54	21982.3	123995	3557.72
A6	11	47786.5	9703.74	24841.3	130687	5443.53
A7	11	45890.4	8739.96	23824.5	127937	4955.31
A8	11	208919	34000.2	76127.3	383709	22782.7
A9	11	45569.1	10716.2	24485.5	132121	4107.04
A10	11	43245.4	8703.05	21589.8	130882	4710.28
A11	11	43475.9	8268.69	20565.1	135252	3507.79
A12	11	52998.1	9868.28	19635.3	136681	4592.64
B1	11	35858.7	6374.69	19543	130488	4166.68
B2	11	44375.1	7219.24	22554.4	136090	4155.75
B3	11	33732.1	7097.57	23435.2	131413	3690.95
B4	11	36668.1	6310.59	22613.9	126191	3888.67
B5	11	39547.1	6444.23	25711	146862	4139.08
B6	11	32030.9	5485.51	23092.4	125260	2781.58
B7	11	31840.7	5576.19	24521.4	131304	3163.56
B8	11	119924	18737.8	75756.7	423899	11191
B9	11	42023.4	7863.25	25431.7	137846	3632.52
B10	11	54880	10411.6	24524.3	139549	4379.6
B11	11	59061.9	11046.8	24015.1	142822	5562.14
B12	11	97167	17637.5	26585.3	151839	8360.51
C1	11	39732.3	6664	20689.2	130543	3994.68
C2	11	46925.7	7508.43	28563.8	173259	5076.29
C3	11	37008.1	5363.62	23199.5	130621	2996.95
C4	11	37261.4	6296.59	23148.3	124418	3663.66
C5	11	37678.3	6356.04	24329.3	125997	3571.86
C6	11	42866.7	5784.56	23383	123302	2463.34
C7	11	33332.4	5938.01	24725.3	127004	2492.53
C8	11	37969.4	6348.93	25432.7	130241	3444.24
C9	11	49264.8	10068.8	25813.1	128534	4751.71
C10	11	47858.5	9772.07	24297.8	133741	4249.46
C11	11	45022.6	9339.53	22393	131462	2625.21
C12	11	57556.2	10624.6	22065.6	139302	3433.03
D1	11	42674.1	6977.4	21619.9	132977	3603.8
D2	11	34872.4	5560.46	22236	130928	3106.66
D3	11	47123.4	8665.05	25652.4	132456	6039.85
D4	11	37597.7	7154.07	23812.8	122788	5161.22
D5	11	40704.1	7351.78	25156.2	125366	3717.76
D6	11	44027.6	7984.42	24850.4	119759	4974.89
D7	11	28890.2	5057.26	22606.3	114001	2650.32
D8	11	30844	6581.52	25087.4	127416	3057.19
D9	11	37004.2	9599.79	24597	121720	4275.55
D10	11	57076.3	11058.3	24573.3	127699	4891.21
D11	11	62862.6	14253	23447	130018	3617.68
D12	11	158645	22599.7	28812.4	142942	7607.79
E1	11	58484.4	11819.2	21655.9	130800	4975.79
E2	11	42697.4	7275.17	22240.5	125090	4147.69
E3	11	70719.9	9689.66	26204.9	135423	7559.79
E4	11	40992.3	8130.86	25778.5	133218	3990.92
E5	11	33623.7	6077.28	24372	125607	3577.37
E6	11	169198	27490	36448.3	139302	15268.1
E7	11	46813.8	8625.08	25639.8	121133	8027
E8	11	36904.4	7235.09	25576.8	125869	5136.31
E9	11	39721.8	10285.1	28445.1	128817	4140.49
E10	11	50091.8	10453.2	24189.7	126942	4739.3
E11	11	48464.9	9574.64	22357.7	125153	6202.38
E12	11	64414.1	12117.6	22613.5	133026	5466.62
F1	11	46982.1	8949.29	23883.6	140711	9669.82
F2	11	46386	7350.83	23177.7	134168	3782.16
F3	11	34383.4	5880.55	24261.4	135740	3356.16
F4	11	37960.3	6684.06	24986	132628	3406.42
F5	11	35181.4	6026.2	25502.9	132780	2790.51
F6	11	61994.1	11829.9	30133.9	139108	6939.15
F7	11	31363.8	5495.82	25777	131976	4154.4
F8	11	33329.9	5701.13	24405.6	125875	3105.82
F9	11	36330	7014.01	24354.4	128572	4459
F10	11	43556.6	8493.35	22988.3	128504	4272.74
F11	11	42055.3	8007.47	21800.4	130785	2697.33
F12	11	67334.8	13408.2	24876.9	141904	7403.51
G1	11	39681.5	6153.71	21027.3	139091	4362.62
G2	11	49595.8	8009.21	24230.2	143241	3763.19
G3	11	36776	6198.05	23901	136302	3606.1
G4	11	30634	4880.9	23731	132351	2620.19
G5	11	28551.1	4575.98	24290.4	132189	2760.19
G6	11	30017.8	5416.73	24822.4	131357	2642.23
G7	11	27969.7	4932.12	23328.9	124277	2931.95
G8	11	33018.3	6201.48	24851.3	132062	4688.83
G9	11	37443.6	5955.24	23550.5	128179	3591.62
G10	11	50986.2	9444.34	23973	127339	4130.98
G11	11	69847.3	11953.1	24724.2	133266	8536.32
G12	11	41496.4	6292.23	22625.3	147820	3777.93
H1	11	54961.3	9425.45	23705.4	154485	8546.54
H2	11	38637.3	6609.51	23872	154459	3956.24
H3	11	36017.7	6695.36	24492.4	144276	5194.27
H4	11	34360	6240.11	25163.1	142749	3427.37
H5	11	33137.5	6063.83	25006.8	140222	3180.53
H6	11	39813.1	6580.26	23862.9	127999	4635.99
H7	11	31369.8	7097.17	4321.53	6083.82	3752.08
H8	11	31755	5207.05	3451.16	5957.3	3348
H9	11	34814.5	5254.9	3457.13	5806.33	3185.83
H10	11	42296.5	9495.85	6986.98	9852.68	6005.72
H11	11	39913.9	6579.28	4205.18	6003.45	3603.7
H12	11	43931.3	5745.78	3505.84	5810.28	3296.95
A1	12	19645.6	3760.99	14371.9	100094	2956.68
A2	12	35263.7	5454.04	19272.5	126085	3524.97
A3	12	31930.4	5211.06	20806.7	127332	3158.31
A4	12	38784.1	6594.73	20652.2	118337	3163.18
A5	12	40053.1	6730.48	22074.5	123690	3717.83
A6	12	47717.1	9636	25061.5	130246	5468.64
A7	12	45903.3	8762.1	23769.6	127992	4789.03
A8	12	207971	34219.3	75879.6	383327	22482.3
A9	12	45853.5	10521	24383.7	132159	4116.93
A10	12	42743.1	8753.03	21551.8	131068	4874.95
A11	12	43308.4	8303.41	20369.5	135256	3281.29
A12	12	53129.4	10164.4	19821.6	136294	5083.19
B1	12	36473	6091.55	19535.7	130673	3852.02
B2	12	44071.7	7228.16	22541.7	135971	4699.16
B3	12	33667.8	6925.08	23263.5	131420	3701.57
B4	12	36553.4	6090.79	22666.6	126867	3578.1
B5	12	39542.7	6513.19	25713.4	146531	4133.05
B6	12	32362.6	5290.37	23202.1	125027	2842.33
B7	12	31842.5	5556.96	24339.3	131327	3274.52
B8	12	118932	18047.3	75981.9	422329	10787.9
B9	12	42116.3	8043.1	25300.8	138391	3966.85
B10	12	55085.3	10051.2	24527.3	139661	3419.96
B11	12	59099	11213.8	24078.3	142857	5554.06
B12	12	97751.3	17823.2	26715.2	152843	8550.26
C1	12	39965.2	6557.25	20806.7	130504	3964.4
C2	12	46790.2	7579.91	28599.4	173161	5025.26
C3	12	37407.9	5405.25	23233.1	131033	3040.82
C4	12	37084.7	6194.22	23095.1	124655	3510.33
C5	12	37744.8	6413.36	24372.7	126185	3780.5
C6	12	42353.5	5748.01	23463.4	124358	2332.87
C7	12	33356.4	5872.91	24703.6	127001	2396.06
C8	12	38014.6	6496.09	25401	130615	3587.15
C9	12	48949	9789.67	25963.2	128917	4490.68
C10	12	47949.4	9622.33	24267.9	133875	3890.45
C11	12	45066.8	9229.13	22446.4	131442	2389.96
C12	12	57612.6	10812.3	22108.2	138756	4316.19
D1	12	42570.3	6973.19	21653.9	133662	3559.56
D2	12	34817.9	5589.26	22184.5	130973	3212.81
D3	12	47053.3	8559.69	25759.2	132691	6006.14
D4	12	37480.3	7044.63	24029	122716	4995.21
D5	12	40700.6	7264.85	24971.1	125413	3406.2
D6	12	44125.2	7810.77	24738.9	119838	5218.72
D7	12	28683.8	4704.97	22579.8	114202	3046.64
D8	12	30756.7	6261.38	25215.9	127359	3001.24
D9	12	36989.3	9645.76	24516.3	121884	4600.76
D10	12	57061.4	10771.4	24534	127701	5070.21
D11	12	62903.8	14567.2	23558.3	130199	3775.11
D12	12	159035	22656.2	28753.7	142980	8015.21
E1	12	58856.7	12145.4	21648.3	130745	4892.93
E2	12	42813.8	7292.51	22145.6	125269	4025.67
E3	12	70334.7	9734.28	26451.1	135749	7446.88
E4	12	40353.5	8161.99	25851.9	133494	3897.96
E5	12	33661	5745.55	24429.2	125932	3499.83
E6	12	168703	27453.8	36506.5	139707	14982.1
E7	12	46830.9	8556.32	25630.4	121423	7965.47
E8	12	37000	7000.45	25471.2	125807	5480.85
E9	12	39519	10197.9	28472.3	129275	3902.05
E10	12	49918.9	10359.9	23977.6	126759	4510.69
E11	12	48185.1	9387.69	22450.5	125343	6278.85
E12	12	64505.5	12285.6	22861.6	133046	5582.68
F1	12	47342.7	9117.95	23737	141038	9953.06
F2	12	46819.6	7534.33	23376.7	134244	3613.54
F3	12	33962.3	5985.23	24195.9	135755	3326.43
F4	12	38109.3	6803.03	25100.2	132516	3419.46
F5	12	35267.4	6094.22	25379	133013	2578.53
F6	12	61991.3	11565.4	30119.1	139055	7189.45
F7	12	31125.7	5335.25	25791.5	132103	3935.92
F8	12	33304.2	5701.92	24243.3	125974	3284.78
F9	12	36487.4	6987.46	24337.8	128640	4392.63
F10	12	43509.7	8259.62	23140.9	128766	4348.74
F11	12	42096.6	7839.45	21798.5	131015	3106.26
F12	12	66902.4	13389.3	24826.1	141967	7429.99
G1	12	39316	6135.4	21099.9	139281	4143.52
G2	12	49935.6	8086.1	24101	143382	3964.47
G3	12	36868.6	6280.75	23816.1	136397	3486.54
G4	12	30936.9	4839.75	23714.1	132897	2791.71
G5	12	28614.6	4630.18	24341	132163	3289.5
G6	12	30145.7	5238.12	24851.7	131647	2711.47
G7	12	27810.4	4739.09	23426.2	124581	3039.41
G8	12	33125.8	6256.35	24872.1	132576	4637.1
G9	12	37641.9	6088.07	23436.1	128359	3900.85
G10	12	51074.9	9398.67	24024.1	127194	3998.2
G11	12	69554.1	11492.5	24813.5	133241	8557.02
G12	12	41426.9	6517.9	22693.6	147772	3592
H1	12	54396.5	9153.15	23569.9	154467	8668.98
H2	12	39230.7	6331.67	23786.6	154474	3703.79
H3	12	35610.1	6594.13	24290.2	144796	5019.16
H4	12	34178.4	6186.51	25243.7	142986	3208.95
H5	12	33182.1	5907.76	25005.3	140160	3344.92
H6	12	40100.9	6758.6	23944	128093	4665.82
H7	12	31154.2	7022.45	4375.99	6184.69	3478.23
H8	12	32101.3	5101.47	3369.22	6093.25	3569.54
H9	12	34888.1	5381.08	3464.03	5696.09	3159.58
H10	12	42982.3	9660.05	6821.86	9705.47	5921.06
H11	12	40279.4	6540.19	4161.4	6404.36	3498.81
H12	12	44410.6	5862.74	3461.03	5694.13	3086.57
A1	13	19514	3926.77	14059.1	99912.7	3334.37
A2	13	34894.8	5483.19	19531.5	126184	3657.83
A3	13	31658.4	5438.43	20649.4	126584	3065.78
A4	13	38773.8	6525.59	20581.5	118584	2714.46
A5	13	40004.6	6911.66	21955.3	124338	3266.97
A6	13	47920.7	9796.49	24999.2	130816	5253.12
A7	13	45881.9	8714.93	23760.8	128295	4842.89
A8	13	208417	34108.4	76532.4	383738	22494.5
A9	13	45178.7	10841.3	24583.3	131936	3922.11
A10	13	43257.2	8465.62	21700.7	131084	4890.42
A11	13	43055.1	8278.27	20436.6	135478	3707.57
A12	13	52998.1	10093	19681.2	136763	4476.05
B1	13	36345.8	5932.03	19568.4	130697	4312.17
B2	13	44202.9	7415.52	22613.9	135685	4243.06
B3	13	33484.4	7032.41	23417.5	131386	3525.75
B4	13	36535.8	6097.59	22662	126280	3855.24
B5	13	39427.1	6529.35	25771	146761	4203.04
B6	13	32265.6	5246.1	23266.8	125379	2800.62
B7	13	31780.9	5428.46	24202.6	131068	3365.06
B8	13	119171	18233.4	75762.4	423235	10690.1
B9	13	42071.3	7778.34	25260.5	138599	3833.31
B10	13	55243.6	10145	24568	139934	3849.43
B11	13	58701.1	11383	23942.8	143097	5435.13
B12	13	97666.9	17896.6	26592.2	152532	8655.68
C1	13	39871.3	6543.75	20841.2	130747	3991.31
C2	13	46773	7249.75	28704.3	173465	5292.34
C3	13	37375.4	5590.28	23006.8	130763	2933.95
C4	13	36671.2	6284.74	23178.2	124894	3629.11
C5	13	37534.7	6219.67	24405.7	125881	4119.53
C6	13	42552.4	5748.01	23569	124595	2429.64
C7	13	33261.5	5614.08	24642.6	127119	2720.92
C8	13	37915.7	6550.63	25399.2	130509	3523.34
C9	13	48984.6	9620.96	25826.6	129161	4704.91
C10	13	48045.3	9668.33	24216.9	133748	3790.01
C11	13	45174.6	9434.63	22239.3	131991	2881.43
C12	13	57719.2	10788.5	22122	138552	3773.26
D1	13	42985.3	7162.85	21704.8	133190	3586.49
D2	13	35312	5560.46	22254	130996	3079.3
D3	13	47366.3	8523.87	25700	133151	6202.07
D4	13	37770	6770.54	23964.4	123055	4875.72
D5	13	40628.5	7376.34	25056.7	125415	3750.71
D6	13	43945.1	7844.47	24782.8	119853	5223.27
D7	13	28627.6	5071.94	22599.9	114159	2778.78
D8	13	30475.1	6163.21	25108.8	127157	3304.26
D9	13	36870.6	9652.83	24511.7	121959	4616.06
D10	13	57208.9	10874.5	24704.6	128075	4713.17
D11	13	63356.8	14290.4	23450.1	130164	3497.79
D12	13	159791	22801.5	28821.8	142708	7637.6
E1	13	58736.6	12192.5	21537.1	130404	4849.93
E2	13	42678.4	7322.84	22166.7	125053	4034.01
E3	13	70771.7	9793.76	26492.2	135577	7541.91
E4	13	40448.2	8142.42	25913.3	133267	4039.75
E5	13	33647.2	6066.66	24425.5	125786	3470.51
E6	13	168320	27226.7	36486.5	139648	15248.9
E7	13	46591.5	8683.12	25495.7	121223	8068.66
E8	13	36772.1	7164.7	25629.6	125816	5171.82
E9	13	39706	10374.1	28614.7	129165	4011.45
E10	13	50014.1	10470.1	24164.5	126749	4659.43
E11	13	48569.6	9586.2	22380.7	125656	6073.34
E12	13	64878.7	12311.5	22791.7	133383	5891.08
F1	13	47439.1	9003.6	23527.7	141001	9602.2
F2	13	46765.2	7279.52	23496.9	134368	3560.4
F3	13	34062.4	5961.97	24294.2	136209	3280.48
F4	13	37911.1	6598.61	25027.8	132762	3655.13
F5	13	35123.3	6261.03	25482.1	133098	2596.34
F6	13	62113.2	11681.7	30119.9	138923	7157.56
F7	13	31207	5403.06	25805.2	132253	4420.7
F8	13	33292.4	5703.48	24388.7	126410	3175.09
F9	13	36281.8	6968.15	24348.6	128611	4315.21
F10	13	43360.5	8302.12	23022.6	128694	4399.41
F11	13	41960.1	7704.64	21778.7	131141	2841.6
F12	13	67016	13492.2	24867.1	141960	7349.72
G1	13	39507.5	6180.49	21013	139515	3704.04
G2	13	49917.7	8049.43	24281.1	143463	3999.48
G3	13	37078.1	6267.12	23984.1	136388	3686.69
G4	13	30766.3	4891.39	23700.5	132750	2562.2
G5	13	28546	4635.6	24287.3	132584	2832.76
G6	13	30253.6	5143.77	24829	131591	2753.16
G7	13	27843	4731.55	23379.5	124469	3067.64
G8	13	33338.4	6097.48	24949.5	132053	4683.74
G9	13	37627.5	6022.94	23584	128400	3515.41
G10	13	51080.1	9433.6	23997.2	127683	4402.04
G11	13	69821.8	11484.6	24761.2	133302	8200.71
G12	13	41410.8	6483.93	22562.6	147785	3606.83
H1	13	54332.8	8651.27	24001.7	153783	8493.84
H2	13	39073.6	6508.82	23978.4	154306	3978.14
H3	13	35420.4	6342.69	24322	144501	5057.5
H4	13	34357.5	6233.51	25171.1	143240	3386.77
H5	13	33126.4	5959.03	25065.3	140147	3183.53
H6	13	39960	6536.81	23971.7	128158	4330.09
H7	13	31246.3	6998.07	4327.76	6077.62	3616.35
H8	13	31725.9	5228.02	3543.52	6030.56	3445.19
H9	13	35012	5368.81	3540.78	5923.58	3070.33
H10	13	42534.2	9795.05	6992.85	9571.29	5960.9
H11	13	40255.3	6129.77	4057.42	6536.12	3808.99
H12	13	44180.9	5631.78	3542.5	5844.27	3006.08
A1	14	19555.4	3993.75	13982.1	100239	2909.11
A2	14	35455.8	5703.42	18981.4	125860	3307.69
A3	14	32020	5471.12	20682.2	126698	3177.06
A4	14	38987.6	6466.82	20491.3	118628	3201.19
A5	14	40094.8	6565.77	22083.8	124077	3376
A6	14	47808.5	9803.79	24998.2	131076	5033.41
A7	14	45940.8	8764.03	23663.9	128165	4847.61
A8	14	208028	33820.9	76185.6	383759	21093.8
A9	14	45434.3	10650.1	24439.7	132145	3918.16
A10	14	42981.8	8946.16	21709.6	131246	4694.8
A11	14	42797.4	8370.46	20447.1	135256	3526.37
A12	14	53133	9954.59	19775.8	136373	4662.31
B1	14	36172.4	5788.47	19544.8	130756	4342.62
B2	14	43792.9	7339.68	22779.5	135834	4153.14
B3	14	33762.2	7256	23324.1	131496	3556.43
B4	14	36149.6	6309.45	22539.3	126600	3888.67
B5	14	39498.6	6342.95	25874.6	146550	4297.17
B6	14	32314.5	5487.31	23174	125326	2501.43
B7	14	31943.9	5494.89	24369.2	131312	3477.79
B8	14	119044	18392.5	75844	422508	11233.8
B9	14	41796.4	7691.61	25301.7	138463	3780.81
B10	14	54943.1	10159.8	24526.3	140001	4071.57
B11	14	59321.6	11003.6	24042.7	142708	5728.42
B12	14	98436.2	17702.3	27020.5	152748	8350.67
C1	14	39968.9	6792.84	20974.8	130962	3865.71
C2	14	47032.1	7254.86	28618	173508	5773.77
C3	14	37331.4	5637.69	23186.7	131159	3086.95
C4	14	36898.6	6043.35	23142.8	124910	3353.77
C5	14	37661.9	6527	24289.1	125828	3794.54
C6	14	42496.2	5746.35	23483.5	124816	2461.61
C7	14	33182.8	5842.74	24695.2	126733	2507.37
C8	14	37800.6	6344.6	25311.2	130088	3321.11
C9	14	49171.4	9958.38	25875.5	128738	4843.52
C10	14	47563.9	9655.61	24234.9	133419	4127.14
C11	14	44881.8	9224.75	22226.3	131480	2805.23
C12	14	57931	10956	22331.8	139049	3834.9
D1	14	43342.9	7057.48	21618.9	133713	3361.43
D2	14	35397.8	5508.62	22268.5	130779	3157
D3	14	47048.2	8518.6	25813.2	133009	5976.65
D4	14	37661.2	7055.88	24118	122644	5074.51
D5	14	40836.8	7272.41	25003	125760	3635.87
D6	14	43964.3	7661.31	24842.2	119695	5052.23
D7	14	28422	5062.44	22568.8	113885	2717.74
D8	14	30844	6234.84	25348.2	127327	3232.47
D9	14	36894.9	9487.52	24605.4	121555	4351.11
D10	14	57084.6	10844.5	24636.5	127564	5114.72
D11	14	63183.2	14356.7	23398.5	130435	3786.58
D12	14	159482	22725.4	28921.2	142865	7993.35
E1	14	59333.5	12202.8	21849	130767	4714.63
E2	14	42918.5	7145.18	22183.5	125423	4240.51
E3	14	70727.1	9592.07	26404.5	135390	7414.88
E4	14	40496.3	8035.68	25842.7	133256	3704.52
E5	14	33787.4	6054.28	24384	125693	3647.35
E6	14	168257	27236.2	36288.2	139603	15056.4
E7	14	46697	8520.61	25515.5	121760	8009.01
E8	14	36623.2	7319.02	25514.6	125722	5007.71
E9	14	39600.5	10239.3	28634.7	129015	4041.37
E10	14	50182.7	10200	24147.3	126748	4609.85
E11	14	48344.6	9621.86	22436.2	125357	6082.9
E12	14	64976	12243.8	22895.8	133193	5870.35
F1	14	47560.8	8620.53	23867.9	141097	9774.44
F2	14	46956.5	7540.63	23336.3	134349	3530.77
F3	14	34303.4	5983.44	24242.8	136127	3265.16
F4	14	37824.7	6605.31	24969	132903	3606.43
F5	14	35295.4	5952.52	25431.4	132882	2680.28
F6	14	61882.5	11639.4	30136.2	138808	6842.69
F7	14	31104.9	5384.36	25611.7	131969	4143.69
F8	14	33342.4	5820.04	24442	126011	3066.23
F9	14	36509.3	6947.23	24417.3	128794	4490.47
F10	14	43670.7	8382.86	23008.1	128614	4318.17
F11	14	41756.4	7978.29	21933.1	130718	2810.75
F12	14	67138.8	13596.9	24856.4	141596	7222.29
G1	14	39232.6	6273.49	21032.5	139422	3876.74
G2	14	50001.2	8155.89	24190.5	143760	3858.36
G3	14	36878.5	6230.77	23990.3	136084	3491.86
G4	14	30763.9	4809.09	23729.4	132388	2730.45
G5	14	28576.2	4730.84	24406.4	132239	3110.44
G6	14	30029.8	5312.3	24919.2	131615	2798.58
G7	14	27949.8	4757.94	23362.6	124213	2985.29
G8	14	33222.5	6272.73	24914.6	132184	4520.94
G9	14	37316.4	6156.63	23423.2	128167	3580.24
G10	14	51186.4	9575.09	23974.8	127335	4174.94
G11	14	69915.6	11851.7	24858.1	133157	8436.07
G12	14	41636.9	6720.52	22537.6	147862	3782.49
H1	14	54901.5	9090.86	23590.4	153986	8816.23
H2	14	38633.3	6512.64	23956.2	154503	4201.77
H3	14	35415	6696.45	24452.3	144811	5040.92
H4	14	34110.3	6148.58	25226.2	142867	3357.54
H5	14	33162.8	5991.45	24984.6	140145	3398.22
H6	14	39777.9	6853.86	23917	128095	5010.73
H7	14	31201.3	7079.08	4359.65	5997.7	3533.8
H8	14	31777.3	5235.71	3479.63	6108.04	3659.58
H9	14	34803.2	5426.64	3609.76	5787.96	2927.71
H10	14	42284.3	9574.42	6988.94	9880.71	5985.8
H11	14	40379.6	6487.31	4190.96	6199.4	3837.18
H12	14	44638.6	5782.79	3431.16	5483.08	3199.52
A1	15	19639.9	4137.76	14032.4	100077	3302.66
A2	15	35589.4	5447.56	19387.4	126147	3477.92
A3	15	32468	5270.75	20786.2	127102	2803.22
A4	15	39256.4	6464.52	20701.3	118878	3350.05
A5	15	39809.5	6722.24	22122.1	124452	3224.74
A6	15	47504.7	9761.06	25000.3	131273	4975.87
A7	15	45948.3	8869.92	23742.2	128164	4805.1
A8	15	209777	34552.3	75745.6	384111	22653.9
A9	15	45964	10864.7	24400	132189	4074.41
A10	15	42977.9	8580.36	21705.1	131076	4625.18
A11	15	43255.5	8326.16	20606.7	135536	3507.79
A12	15	53184.1	10040.9	19907.9	136625	4487.42
B1	15	36604.7	6280.97	19704.9	130824	3488.31
B2	15	44304.6	7330.76	22519	136100	4104.92
B3	15	33454.3	6792.2	23427.6	131533	3824.28
B4	15	36302.9	6276.6	22593.2	126734	3701.03
B5	15	39281.8	6421.6	25885.2	146356	4340.61
B6	15	32041.1	5351.8	23118.7	125029	2830.54
B7	15	31847.9	5299.96	24400	131070	3234.57
B8	15	118505	18103.9	75939.7	424216	10888.7
B9	15	41906.5	7689.79	25229.7	138333	3941.07
B10	15	55307.7	10027.5	24529.2	140035	3876.09
B11	15	59248.7	10741	24166.8	142673	5612.95
B12	15	98582.2	18019	26600.5	152450	8796.24
C1	15	40132.9	6860.32	20911.5	130875	3655.99
C2	15	46810.8	7865.81	28684	173788	5270.22
C3	15	37152.9	5583.34	23198.3	130969	2990.2
C4	15	37200	6214.69	23264.6	124752	3061.15
C5	15	37890.4	6299.72	24218.8	125931	3737.36
C6	15	42567.6	5811.97	23677.3	125032	2507.41
C7	15	33057	5798.28	25008.3	126983	2759.68
C8	15	38068.4	6432.9	25356.5	130688	3427.17
C9	15	48738.4	9702.71	25868.2	128874	4442.07
C10	15	47868.3	9662.46	24366.8	133982	4128.14
C11	15	45231.4	9288.16	22423.5	131701	2682.64
C12	15	58001.6	10845.5	22358.3	139036	3859.79
D1	15	43048.2	6853.07	21809.8	133380	3799.04
D2	15	35262.1	5542.03	22242.8	131352	3325.52
D3	15	46815.5	8536.51	25696.8	132755	6343.21
D4	15	37544.8	6964.86	23837.2	123032	5082.97
D5	15	40565.2	7416.03	25072.6	125353	3452.13
D6	15	44065.2	8103.65	24817.5	119766	5250.57
D7	15	28595.5	5035.68	22657.4	113784	3010.2
D8	15	30349.7	6319.74	25317.5	127639	3216.62
D9	15	36740.8	9490.17	24558.1	121653	4245.9
D10	15	57495.4	10952.4	24548.4	127678	4901.85
D11	15	63529.3	14616.9	23614.9	130303	3715.68
D12	15	160475	22720.6	28822.8	143000	7812.49
E1	15	59016.4	12595.7	21827.2	130780	4883.49
E2	15	43103.6	7231.84	22277.4	125282	4307.26
E3	15	71038.3	9388.52	26359.7	135556	7679.3
E4	15	40387.8	8051.69	25910.5	133299	3996.56
E5	15	33644.7	6005.62	24446.7	125791	3484.7
E6	15	168300	27307	36429.2	139416	15196.6
E7	15	46496.6	8547.39	25553.2	121227	7972.09
E8	15	36866.1	7229.68	25530.6	125744	4914.62
E9	15	39759.2	10625.1	28602	129234	3542.05
E10	15	49742.4	10381.2	24250.2	126914	4680.55
E11	15	48506	9589.09	22562.5	125154	6132.6
E12	15	64976.9	12152.7	22629.7	132858	5839.68
F1	15	48044.6	8890.68	23794.6	141351	9373.82
F2	15	46998.3	7537.48	23312	134303	3864.94
F3	15	34397.3	5842.98	24171.1	136252	3133.62
F4	15	37835	6539.96	25140.2	133071	3540.34
F5	15	35115.7	6303.14	25502.1	133083	2785.43
F6	15	61828.5	11787.5	30133.1	139221	6842.69
F7	15	31008.5	5672.75	25796.4	132164	4442.96
F8	15	33075.7	5935.03	24351.5	126179	3198.19
F9	15	36202.7	7130.68	24361	128784	4222.48
F10	15	43145.8	8484.85	23062.9	128755	4381.06
F11	15	42133.9	7882.72	21823.2	130967	2600.82
F12	15	67458.5	13466.5	24855.6	141975	7517.7
G1	15	39895	6117.08	21245.2	139217	4273.69
G2	15	50330.3	8136.96	24326.4	143927	3979.79
G3	15	37091.5	6229.86	23844.4	136330	3654.81
G4	15	30850.8	4821.19	23823.2	132896	2487.05
G5	15	28608	4747.87	24290.4	132249	2992.9
G6	15	29846	5210.75	24978.6	131910	2710.72
G7	15	27801.9	5029.39	23401.7	124490	2902.93
G8	15	33352.2	6057.36	24885.4	132126	4766.83
G9	15	37546.1	6093.21	23519.5	128439	3461.1
G10	15	51020.4	9593	23937.2	127716	4245.45
G11	15	70347.8	11767.2	24891.9	133518	8838.15
G12	15	42004.7	6533.67	22514.8	148363	3627.36
H1	15	54558.4	8946.7	23582.5	153901	8803.83
H2	15	39146.1	6595.49	23838	154373	3836.35
H3	15	35811.7	6662.71	24346.6	144625	4932.12
H4	15	34327.5	6350.61	25121.6	142820	3257.66
H5	15	33255.8	5825.59	24992.8	140353	3230.07
H6	15	40011.7	6728.11	24019.8	128310	5034.43
H7	15	31266.5	7024.81	4283.41	6138.14	3544.12
H8	15	31692.8	5186.07	3524.07	5918.55	3473.78
H9	15	34827.5	5348.65	3588.21	5886.83	2987.21
H10	15	42314.8	9632.85	7117.91	9534.23	5892.18
H11	15	40839.1	6232.09	4122	6264.72	3610.47
H12	15	44549.4	5769.47	3588.67	5831.52	3466.39
A1	16	19414.5	3704.06	14079.5	99710.8	3503.04
A2	16	35352.2	5339.06	19459.5	126314	3520.82
A3	16	31816.4	5506.65	20791.6	127271	3204.57
A4	16	39456	6405.75	20651.1	118641	3395.45
A5	16	39615.5	6586.36	22156.3	124134	3463.42
A6	16	47861.3	9675.6	25035.8	131270	5047.01
A7	16	46033.9	8689.9	23728.5	128334	5322.83
A8	16	208196	34708.8	76401.3	384069	22844
A9	16	45726.8	10754.8	24450.9	132398	3944.86
A10	16	43000.2	8913.21	21711.9	131202	5003.15
A11	16	43497.4	8251.93	20455.2	135142	3578.64
A12	16	53010.8	9845.96	19832.8	136523	4693.59
B1	16	36547.6	5906.11	19481.1	130747	4332.47
B2	16	43491.1	7778.34	22671.9	135788	4240.45
B3	16	33743.1	7239.39	23276.1	131398	3817.2
B4	16	36844.8	6413.69	22632.2	126527	4031.02
B5	16	39782.6	6484.09	25620.4	146798	4104.09
B6	16	32024.5	5382.52	23232.1	125265	2591.19
B7	16	31833.4	5365.52	24333	131292	3066.81
B8	16	119076	18152.5	75804.6	423951	11227.7
B9	16	41809.8	7743.65	25325.1	138410	3857.25
B10	16	55516.3	10120.3	24298.8	139902	3877.08
B11	16	59883.3	10764.3	24099	143587	5570.22
B12	16	98760.8	17973	26394.6	152226	8948.05
C1	16	39895	6633.32	21116.5	130791	3829.82
C2	16	46376.7	7663.3	28514.7	173457	5271.93
C3	16	37529.5	5474.63	23160	130934	3001.45
C4	16	36768.5	5984.08	23081.8	124950	3390.48
C5	16	37580	6224.62	24320	126067	3872.78
C6	16	42365.5	5743.85	23539.3	125831	2727.73
C7	16	32868.8	5828.45	24706.9	127051	2627.75
C8	16	37776.7	6247.64	25401.9	130433	3311.22
C9	16	48832.6	10014.9	25969.5	128911	4640.1
C10	16	48117.5	9584.16	24344.8	134002	4120.18
C11	16	44900	9090.3	22376.7	131465	2732.33
C12	16	57687.1	10681.6	22288	139037	3627.45
D1	16	43179.5	6951.06	21726.8	133550	3466.26
D2	16	35032.5	5653.77	22360.4	130843	3456.83
D3	16	46775.9	8558.64	25867.1	132963	6108.32
D4	16	37551.5	6929.06	24064	122764	5376.93
D5	16	40750.7	7495.39	24909.4	125300	3301.35
D6	16	43937.1	8047.49	24876.9	119748	4941.23
D7	16	28315.2	4987.32	22644.6	114117	2767.85
D8	16	30870.5	6164.09	25191.7	127251	3165.34
D9	16	36668.8	9440.66	24519.1	121601	4492.68
D10	16	57134.7	10834.2	24535.9	127844	5026.67
D11	16	63614	14829.5	23629.4	130483	3443.58
D12	16	160788	22852.2	28975.1	143207	8167.25
E1	16	59609.7	12386.6	21866.4	130925	4835.24
E2	16	43247.5	7188.51	22284.7	125115	4100.76
E3	16	70719	9688.73	26540.7	135597	7713.17
E4	16	40338.8	8254.5	25833.5	133430	3860.4
E5	16	33330.2	6016.24	24470.6	125574	3498.88
E6	16	168466	27236.2	36359.2	140059	14962
E7	16	46414.7	8583.11	25546.6	121320	8032.68
E8	16	36358.7	6969.77	25683.3	125797	5310.02
E9	16	39657.8	10387.3	28538.5	128935	3959.09
E10	16	49927.6	10269.3	24156.3	126697	4675.04
E11	16	48543.2	9699.91	22498.4	125227	6173.71
E12	16	65470.8	12294.8	22806.3	133423	5862.06
F1	16	47029.5	8366.1	23827.3	141335	9982.41
F2	16	46903.2	7541.67	23375.7	134380	3789.32
F3	16	34172	5520.01	24225.1	136190	3312.01
F4	16	37869.9	6572.64	25080.6	133138	3598.61
F5	16	35122.5	6174.39	25647.6	133341	2609.91
F6	16	61966.3	11550.3	30174.4	139124	6963.06
F7	16	30810.7	5449.83	25760.1	132411	4410.81
F8	16	33396.7	5836.46	24349.9	126182	3121.49
F9	16	36351.1	7067.12	24556.3	128614	4305.85
F10	16	43491.2	8393.06	23175.1	129134	4542.68
F11	16	42022.2	7894.79	21746	130981	2819.71
F12	16	67484.1	13690.4	24821.2	141805	7377.86
G1	16	39473.9	6000.12	21135	139231	3954.07
G2	16	50314.8	8174.81	24346.2	143504	3736.93
G3	16	36933.3	6144.43	23856.8	136539	3324.48
G4	16	30713	4666.27	23787.9	132825	2582.61
G5	16	28573.3	4555.85	24409.5	132409	2981.06
G6	16	30139	5316.62	24873.7	131682	2794.11
G7	16	28070.9	4747.39	23355.7	124216	2947.64
G8	16	33245.5	6197.39	24966.1	132130	4704.94
G9	16	37724.1	6237.19	23644.2	128350	3547.82
G10	16	51045	9481.06	24073.3	127460	4261.02
G11	16	70104.5	12036.4	24909.3	133311	8079.75
G12	16	41734.5	6566.43	22640.1	148018	3630.78
H1	16	54570	9016.11	23918.2	153856	8551.18
H2	16	39288.4	6443.82	23946.8	154476	3903.21
H3	16	35330.9	6668.15	24542.7	144665	5004.65
H4	16	34343.7	6324.23	25190.3	142820	3149.67
H5	16	33451.3	5918.32	25026.1	140349	3407.23
H6	16	40165.3	6865.29	23846.4	127995	4580.93
H7	16	31213.3	7053.91	4384.55	6048.13	3514.75
H8	16	31916.6	5158.1	3462.27	6115.09	3547.38
H9	16	34795.4	5295.2	3483	6290.2	3172.7
H10	16	42383.9	9887.73	7081.76	9735.51	5898.15
H11	16	40383.2	6743.67	4119.81	6247.82	3680.4
H12	16	44278.4	5790.2	3507.2	5701.21	3525.69
A1	17	19371.3	3712.43	13997.8	100051	3299.78
A2	17	35361.6	5190.08	19355.3	126315	3259.25
A3	17	32432.2	5404.33	20656.2	127232	2891.99
A4	17	39046.5	6342.37	20640.8	119009	3226.52
A5	17	39768.9	6634.74	21965.7	124128	3444.76
A6	17	47588.3	9960.11	25178.7	131885	5184.07
A7	17	45676.2	8834.3	23703	128427	4885.4
A8	17	208464	34091.3	76517.9	383232	23190.3
A9	17	45918	10776.2	24536.4	132022	4247.47
A10	17	42950.3	9080.21	21780.2	131352	4698.12
A11	17	43006.4	8265.1	20458.6	135305	3606.52
A12	17	52926.9	9841.5	19707.6	136302	4835.78
B1	17	36306.3	5832.33	19746.8	130434	4171.76
B2	17	44066.8	7433.36	22751.2	136058	4296.49
B3	17	33313.3	6942.97	23332.9	131373	3526.93
B4	17	36732.5	6000.16	22676.9	126578	3658.98
B5	17	39433.7	6527.19	25887.6	146582	3825.33
B6	17	32110.4	5424.98	23091.5	125350	2719.03
B7	17	31542.8	5299.09	24410.9	131354	3217.71
B8	17	119821	18740.5	75931.2	421994	10485.5
B9	17	41395.1	7774.69	25362.5	138398	3657.39
B10	17	55505.6	9785.49	24548.1	140136	3988.64
B11	17	59622.3	11177.6	23949.6	142834	5623.34
B12	17	99280.1	18099.7	26614.3	153052	8406.89
C1	17	40180.5	6882.41	20929.9	130889	4139.35
C2	17	47159	7295.7	28731.4	173590	4991.23
C3	17	37413.6	5438.78	23250.5	131083	2798.95
C4	17	36808.7	6259.95	23182.7	124923	3745.72
C5	17	37852.8	6087.26	24314.9	126114	3724.32
C6	17	42732.8	5797.02	23767.3	126204	2144.52
C7	17	33158.9	5775.25	24797.1	126873	2748.96
C8	17	37867.1	6279.67	25358.4	130452	3116.18
C9	17	48785.9	9894.03	25953.3	128798	4660.8
C10	17	48227.2	9645.82	24317.8	133966	4034.65
C11	17	45125.8	9198.52	22257.9	131732	2779.82
C12	17	57970.8	10359.7	22288	139092	3791.04
D1	17	43261.2	6912.08	21633.9	133491	3520.12
D2	17	35469.7	5760.9	22604.6	131355	3214.99
D3	17	47209.8	8483.83	25958.1	132968	6211.55
D4	17	37630.4	6995.54	23751.3	123041	5171.79
D5	17	40795.5	7397.13	25152.3	125392	3922.47
D6	17	44060.4	7897.17	24970.2	119932	5340.64
D7	17	28649.3	5025.31	22495.8	114125	2636.65
D8	17	30647.9	6299.4	25280.2	127346	3212.89
D9	17	36553.9	9364.64	24475.5	121670	4243.03
D10	17	57383.2	10910.2	24453.5	127787	5104.08
D11	17	63812.9	14895.8	23398.5	130598	3513.43
D12	17	160943	22994.6	28892.8	142896	7894.97
E1	17	59346.7	12607.1	21846.8	130911	4631.77
E2	17	42916.4	7437.66	22254.2	125458	3834.82
E3	17	70329.4	9773.31	26321.5	135385	7829.85
E4	17	40366.6	8070.37	25838.1	133568	3650.05
E5	17	33403.2	5859.66	24317.6	125634	3721.11
E6	17	168172	27149.8	36338.3	139578	15124.2
E7	17	46412.2	8505.42	25425.1	121607	8146.28
E8	17	36672.3	6974.28	25562.7	126103	5454.93
E9	17	39455.8	10448	28506.8	129011	4177.89
E10	17	49903.2	10244.4	24138.3	126904	4597
E11	17	48401.3	9616.07	22627.6	125682	6216.72
E12	17	65332.9	12257.2	22857.6	133358	5525.48
F1	17	47949.7	8816.35	23805.1	141035	9570.3
F2	17	46843.6	7421.08	23347.4	134677	3594.13
F3	17	34369.5	5863.56	24262.3	135933	3198.49
F4	17	38365.4	6618.71	25075.5	132833	3213.35
F5	17	35046.3	6062.64	25426.4	133305	2787.12
F6	17	61933.8	11572.9	30151.8	139176	6894.51
F7	17	30965.3	5591.69	25738.3	131921	4228.6
F8	17	33118.3	5823.17	24345.1	126255	3205.61
F9	17	36354.8	6853.08	24394.1	128574	4392.63
F10	17	43569.2	8358.21	23017.5	128821	4353.98
F11	17	42223.9	7788.14	22023.1	131146	2873.44
F12	17	67294.5	13385.8	25022.6	142097	7538.39
G1	17	39241.4	6141.03	21199.8	139099	3853.54
G2	17	50130	8030.5	24285.5	143485	4116.53
G3	17	37076.3	6236.22	23886.8	136655	3535.25
G4	17	30642.6	4885.74	23682.8	132971	2875.83
G5	17	28644.1	4564.37	24327	132151	3131.73
G6	17	30385.4	5356.95	24843.6	131428	2691.37
G7	17	28384.4	4846.16	23389.4	124074	2780.57
G8	17	33634	6323.5	24941.2	131947	4687.13
G9	17	37951.2	6113.78	23621	128340	3421.68
G10	17	51583.2	9550.91	24006.2	127396	4110.83
G11	17	70822.8	11776.3	24835.3	133344	8254.1
G12	17	42401.9	6635.59	22592.3	147803	3735.73
H1	17	54504.4	9039.25	23820.5	153961	8441.14
H2	17	38985	6547.06	24000.6	154080	3891.68
H3	17	35369.7	6402.56	24473.9	144501	5184.94
H4	17	34565.8	6174.96	25218.2	142803	3516.69
H5	17	33391.1	5813.52	25065.3	140228	3248.09
H6	17	40272.5	6795.94	23926	128239	4781.3
H7	17	31217.8	7146.72	4302.86	5885.97	3543.32
H8	17	32088.4	5232.22	3487.97	6064.37	3446.62
H9	17	35113.4	5291.7	3553.71	5781.83	2861.21
H10	17	42443.8	9636.88	6971.35	9453.12	6055.52
H11	17	40307.2	6556.28	4104.49	6263.59	3590.17
H12	17	44400.7	5621.42	3397.22	6022.75	3165.64
A1	18	19450.2	4057.39	14236.7	99440.5	3312.75
A2	18	35305.2	5489.66	19309.3	126165	3691.05
A3	18	32192.7	5542.17	20694.5	126841	2868.23
A4	18	38972.2	6635.06	20708.1	118496	3083.99
A5	18	40178.2	6485.47	22115.9	123705	3648.09
A6	18	47786.5	9892.37	25198	131792	5037.6
A7	18	46018.9	9045.12	23798	128437	4990.27
A8	18	209341	33835.1	76348.8	382552	22880.7
A9	18	45464.3	10845.3	24553.7	132292	3796.52
A10	18	42987	8848.46	21756.7	131242	4824.11
A11	18	43099.5	8477.03	20456.3	135296	3733.13
A12	18	53200.5	9701.63	19652	135631	5144.33
B1	18	36258	5628.95	19435.6	130463	3841.87
B2	18	44429.2	7433.36	22626.6	135736	4721.31
B3	18	33782.8	6958.3	23433.9	131518	3649.65
B4	18	36714.9	6162.17	22691.9	126736	3804.56
B5	18	39831	6367.73	26093.6	146147	4072.71
B6	18	32658.2	5316.57	23199.3	125446	2770.7
B7	18	31609.8	5270.24	24392.8	130917	3408.55
B8	18	118143	18602.9	75762.4	423330	11829.4
B9	18	41493.7	7577.49	25326.9	138713	3848.04
B10	18	56688.4	10254.6	24612.7	139706	4040.97
B11	18	60569	11323.5	23970.3	143158	5416.65
B12	18	100596	18397.7	26875.4	152509	8659.9
C1	18	39960.2	6832.1	20853.9	130884	3738.98
C2	18	46960	7404.62	28563.8	173230	5688.71
C3	18	37536.5	5911.77	23156.5	131224	3371.56
C4	18	36748.4	6379.57	23196	124646	3481.18
C5	18	37711.1	6327.39	24169.3	125799	3486.6
C6	18	42889.1	6026.27	23638	126562	2384.71
C7	18	33030	5809.39	24777.9	126953	2588.17
C8	18	37460.2	6334.21	25430.9	130429	3159.32
C9	18	48890.4	9728.8	26015.7	128898	4601.39
C10	18	48029.5	9558.72	24379.8	134091	3950.12
C11	18	44725.2	9070.63	22438.8	131404	2877.01
C12	18	57792.4	10547.4	22110.5	139087	3863.35
D1	18	43182.8	6998.48	21629.9	134081	3470.11
D2	18	35271.4	5475.22	22282	130982	3175.6
D3	18	47117.3	8678.75	25785.7	132708	5985.08
D4	18	37927.8	7117.25	23958	122840	5190.83
D5	18	40950.2	7551.14	24812.9	125370	3462.12
D6	18	44170.8	7943.82	24904.3	119807	4954.87
D7	18	28338.5	5042.58	22662.9	113949	2969.2
D8	18	30655.4	6324.17	25364.1	127190	3187.72
D9	18	36626.8	9389.39	24588.7	121467	4301.38
D10	18	57654.8	10985.2	24558	127916	4763.48
D11	18	64624.6	14925.9	23636.6	130489	3542.62
D12	18	161369	23066.7	28978.9	143126	8115.57
E1	18	59994.1	12573.8	21816.3	131400	5155.15
E2	18	43147	7383.5	22298.4	125326	4129.96
E3	18	70747.6	9827.22	26442.7	135573	7412.06
E4	18	39940.7	8212.69	25767.5	133104	3838.8
E5	18	33746.9	6145.39	24502	125724	3706.92
E6	18	168026	27324.2	36413.8	139689	15033.5
E7	18	46346.5	8349.16	25487.2	121218	7609.51
E8	18	36709.7	7093.41	25541	125757	5018.27
E9	18	39391	10622.5	28753.5	128989	4135.81
E10	18	49930.2	10265.7	24262	126976	4598.83
E11	18	48575.4	9450.33	22419	125582	6206.2
E12	18	65644.9	12294	22910.4	133214	5904.34
F1	18	47807.2	8773.47	23992.2	141294	9853.54
F2	18	47120.5	7554.26	23337.3	134453	3714.72
F3	18	34346	6106.01	24278.3	136180	3328.23
F4	18	38374.1	6564.26	25113	132985	3421.2
F5	18	35259.9	6120.14	25518.7	133332	2810.86
F6	18	62156.1	11755	30073.9	139020	6997.34
F7	18	30851	5410.08	25739.1	132263	4068.66
F8	18	33039.8	5572.06	24278.1	126077	3075.31
F9	18	36281.8	6865.15	24425.5	128720	4665.74
F10	18	43668.2	8347.16	23089.5	128966	4308.56
F11	18	42500	7553.72	21848.9	130577	2845.58
F12	18	67757.1	13608.9	24843.3	142032	7734.5
G1	18	39443.2	6234.04	21211.5	139086	4198.94
G2	18	50405.4	8080.19	24376.1	143462	4042.15
G3	18	37257.8	6204.41	23840	136595	3789.41
G4	18	31091.9	4755.03	23727	132698	2916.67
G5	18	29120.8	4680.51	24376.8	132498	2943.99
G6	18	30462.7	5238.84	24840.7	131510	2780.71
G7	18	28627.9	4782.07	23314.3	124370	2981.36
G8	18	33955.7	6320.22	25026	132181	4633.71
G9	18	38435.2	6221.76	23623.6	128075	3521.54
G10	18	52153.8	9465.84	24137.8	127942	4302.23
G11	18	70793.8	11771.8	24834.2	133353	8594.07
G12	18	43019.8	6737.51	22621.9	147841	3739.15
H1	18	54720.3	8734.92	23899.2	153926	8301.64
H2	18	39688.5	6604.41	23887.2	154577	4085.35
H3	18	35722.3	6638.76	24397.9	144731	4979.79
H4	18	34707.7	6377	25087.3	142933	3334.8
H5	18	33349.4	5839.91	25054.2	140087	3114.47
H6	18	40389.4	6644.28	23801.4	128168	4600.81
H7	18	31411.8	6876.17	4389.22	6161.41	3355.2
H8	18	31814.5	5179.08	3395.61	5829.09	3497.36
H9	18	34843.9	5305.72	3501.11	5780.96	3016.08
H10	18	42808.6	9691.29	7031.93	9563.27	5865.29
H11	18	40461.6	6509.15	4086.97	6331.16	3655.59
H12	18	44124.7	5673.24	3478.68	6056.74	3529.93
A1	19	19872.9	3854.77	14106.2	99743.4	3505.92
A2	19	35363.5	5405.46	19211.3	125916	3286.93
A3	19	32919.2	5522.28	20745.1	126853	3018.27
A4	19	39034.9	6606.25	20529	118654	2874.94
A5	19	39903.1	6727.39	22036.1	124211	3857.31
A6	19	47918.5	9855.9	25151.8	132083	5339.96
A7	19	45643	8778.47	23839.1	128126	5098.92
A8	19	208333	34754.4	75996.2	383759	22859.3
A9	19	45662.3	10398.9	24445.8	132112	3949.8
A10	19	43363.4	8846.19	21715.2	130860	4851.74
A11	19	43251.2	8346.52	20598.6	135189	3612.33
A12	19	53357.4	9828.11	19885.6	135869	4703.55
B1	19	35797.2	5884.18	19644.9	130607	3921.38
B2	19	44462	7425.93	22725.7	136185	4786.47
B3	19	33723.9	7406.77	23226.9	131510	3457.31
B4	19	37749.6	6346.84	22457.9	126910	4206.8
B5	19	40163.4	6766.39	25804	146662	4049.79
B6	19	33341.8	5329.22	23194.6	125555	2758.92
B7	19	31577.2	5483.53	24355.6	131400	3431.63
B8	19	118108	18813.3	75798.9	422372	11469
B9	19	41749.5	7589.36	25297	138534	3789.1
B10	19	58152.4	10257.6	24619.6	139595	4374.67
B11	19	62069.8	11168.2	24061.1	142916	5448.98
B12	19	102349	18456.8	26738.7	152869	8360.51
C1	19	40041.5	6873.82	21106.1	130883	3874.68
C2	19	47708	7719.46	28717.8	173691	5499.88
C3	19	37436.8	5760.28	23168.1	131258	2698.83
C4	19	36916.6	6067.06	23241.4	124884	3715.49
C5	19	37778.6	6155.44	24372.7	126012	3740.37
C6	19	42985.4	5814.46	23755.1	127041	2408.04
C7	19	32928.9	5677.59	24749.5	127066	2718.45
C8	19	37533.6	6324.69	25369.2	130172	3385.82
C9	19	48920.1	9784.45	25989.4	128854	4735.51
C10	19	48505	9852.32	24403.8	133658	4308.14
C11	19	45724	9169.01	22604.4	131729	2996.29
C12	19	58390.6	10540.3	22266.1	138782	3815.93
D1	19	43114.4	6811.98	21703.8	133400	3447.03
D2	19	35240.1	5861.12	22334.6	131558	3414.15
D3	19	47322.6	8803.08	25940.1	132957	5824.97
D4	19	38395.4	6677.47	23937.9	122743	5223.61
D5	19	41274.6	7394.29	24874.6	125206	3688.8
D6	19	44666.4	7945.55	24892.5	119747	5218.72
D7	19	28407.6	4871.62	22511.3	114084	2641.21
D8	19	30681.1	6258.72	25281.1	127392	3274.42
D9	19	36496.9	9455.69	24646.2	121994	4357.81
D10	19	58471.7	10806.1	24548.4	127942	4770.26
D11	19	64745.3	15286.7	23679.9	130350	3537.41
D12	19	161885	23091.1	29034.7	143247	8152.34
E1	19	60114.2	12714	21664.7	131245	5098.51
E2	19	43025.4	7280.59	22291.1	125756	3948.5
E3	19	70566.6	9829.08	26431.6	135754	7669.89
E4	19	40622.7	8206.46	25950.9	133628	4162.77
E5	19	33527.2	5892.39	24330.5	125494	3603.85
E6	19	167706	27207.7	36363.7	139515	14974.8
E7	19	46196.4	8546.5	25526.8	121219	7878.37
E8	19	36435.2	7091.6	25476.9	125792	5168.94
E9	19	39272.9	10145.9	28696.4	128695	3853.42
E10	19	50160	10215.1	24301.7	126762	4686.05
E11	19	48651.7	9649.8	22353.9	125622	6295.1
E12	19	65676.8	12548.1	22936.5	133145	5752.63
F1	19	47382.8	8892.11	24002.6	140997	9552.44
F2	19	47091.2	7534.33	23287.8	134820	3692.23
F3	19	34353.8	5893.08	24387.2	136330	3287.68
F4	19	38491.5	6597.77	25142.8	133401	3630.78
F5	19	35606.3	6189.77	25388.1	133122	2878.7
F6	19	62577.9	11700.6	30012.4	139187	7218.95
F7	19	30976.8	5475.55	25818.9	132480	3783.4
F8	19	33177.1	5691.75	24327.3	126326	3259.21
F9	19	36000.1	6794.35	24409	128681	4492.18
F10	19	44276.9	8450.85	23054.3	128841	4443.09
F11	19	42683.1	7811.28	21997.4	131176	2740.11
F12	19	68087.9	13681	25029.2	141867	7790.77
G1	19	39753.1	6101.58	20932.6	139066	3490.1
G2	19	50130	8283.64	24355.1	143865	3942.6
G3	19	37514.9	6455.24	23970.8	136531	3686.69
G4	19	31315	4957.56	23761.5	132876	2906.87
G5	19	29300.9	4792.78	24477.2	132607	3009.46
G6	19	30758.3	5349.75	24998.4	131208	2938.54
G7	19	29474.3	4973.6	23444.6	124670	3077.84
G8	19	35145.1	6445.52	24997.8	132067	4651.52
G9	19	39253	6108.64	23593.5	128378	3481.25
G10	19	52830.7	9718.38	23941.7	127687	4111.75
G11	19	71703.3	11801	24833.1	133396	8614.77
G12	19	44202.1	6827.3	22709.6	147480	3363.87
H1	19	55780.6	8989.42	23629.8	153966	8393.09
H2	19	39889.9	6720.39	23992.5	154538	3986.21
H3	19	36328.2	6620.26	24461.6	144647	5257.48
H4	19	34722.2	6380.3	25333.9	143152	3381.9
H5	19	33648.4	6208.58	25042.4	140234	3212.06
H6	19	40784.3	6856.15	23924.5	128186	4732.35
H7	19	31204.3	7075.15	4411	5916.23	3568.72
H8	19	31928.1	5240.61	3444.22	6179.89	3537.38
H9	19	34907.2	5337.26	3394.18	6086.33	2946.96
H10	19	42420.5	9748.71	6980.15	9536.24	6178.02
H11	19	40483.3	6237.84	4175.63	6567.65	3545.05
H12	19	44187.5	5594.77	3573.73	5705.46	3566.64
A1	20	19692.5	3978.68	14147.1	99571	3063.36
A2	20	35964	5241.9	19309.3	126335	3799
A3	20	32904.6	5539.33	20880.5	126891	3347.11
A4	20	39280.7	6683.46	20815.4	118560	3363.78
A5	20	40378.9	7058.87	22141.8	124302	3727.65
A6	20	48148.6	9973.66	25201.2	132281	5194.53
A7	20	45704.1	8834.3	23818.6	128434	4858.95
A8	20	208035	33912	76293.5	384212	22991.1
A9	20	45576	10458.9	24340	132236	3927.06
A10	20	43851.2	8774.62	21711.9	131318	4650.6
A11	20	43770.8	8134.59	20594	135107	3411.38
A12	20	53815.2	10008.2	19604.7	136067	4470.36
B1	20	36328.2	6107.5	19561.2	130398	3718.38
B2	20	44137.3	7538.94	22738.5	135834	4353.82
B3	20	33625.3	6962.13	23391	131752	3784.16
B4	20	38295	6635.75	22629.9	126738	3823.97
B5	20	41539.3	6519.65	25910	147074	4281.48
B6	20	34110.5	5521.64	23295.8	125618	2504.15
B7	20	31617.9	5444.19	24400	131380	3365.06
B8	20	117999	18559.8	75824.3	422681	11942.4
B9	20	41472.6	7624.05	25386.8	138230	3976.06
B10	20	60822.7	10725.7	24554.1	140179	3928.41
B11	20	65447.5	11869.8	24071.5	143064	5878.53
B12	20	105519	18790.8	26727.6	152688	8472.96
C1	20	39739.8	6666.45	20847	130901	4102.34
C2	20	47339.2	7501.62	28628.1	174035	5494.78
C3	20	37435.7	5834.29	23251.7	131212	3035.2
C4	20	37309	6519.66	22995.4	124516	3545.96
C5	20	37935.7	6228.57	24340.7	126097	3311.07
C6	20	43128.1	5959.82	23877.3	126747	2635.28
C7	20	33054.7	5857.82	24775.4	126495	2903.97
C8	20	37740.8	6191.37	25315.7	130230	3224.03
C9	20	48786.8	9893.16	25944.2	128706	4755.31
C10	20	48878.7	9959.98	24468.7	133966	4280.29
C11	20	46217.8	9217.1	22336.3	131569	2822.9
C12	20	58683.3	10736.3	22296	138958	4106.36
D1	20	43485.2	6802.49	21482	134098	3561.48
D2	20	35243.5	5639.95	22515	130752	2969.88
D3	20	47342.9	8651.36	25826.9	133015	6038.8
D4	20	38772.6	6944.4	24043.8	122634	5342.04
D5	20	42014.9	7485.94	25008.9	125223	3934.45
D6	20	45379.6	8060.45	24855.9	119887	4973.07
D7	20	28190	4774.05	22614.5	114158	2944.6
D8	20	30417	6168.52	25195.4	127283	3117.79
D9	20	36713.7	9353.14	24538.6	121659	4619.89
D10	20	59472.1	11159.6	24589.6	128146	4760.58
D11	20	66222.7	15378	23411.9	130218	3456.09
D12	20	163993	23303.7	29147.3	143316	8068.87
E1	20	60049.3	12915	21720.3	131022	4921.25
E2	20	42638.2	7189.6	22296.3	125802	4374.01
E3	20	70327.6	9601.36	26412.9	135521	7803.51
E4	20	40382.9	8094.39	25970.1	133324	4214.42
E5	20	33500.5	6010.93	24508.4	125671	3523.47
E6	20	168054	27169.7	36286.4	139581	14903.3
E7	20	46189.1	8509.89	25693.5	121359	7924.76
E8	20	36241.4	7065.43	25568.3	125479	5082.57
E9	20	39464.9	10589	28765.3	129152	3994.62
E10	20	50288.4	10358.1	24224.9	126804	4490.5
E11	20	48748.6	9789.53	22551	125568	6253.04
E12	20	65881.9	12373.4	22909.6	133184	5901.03
F1	20	47479.2	8816.35	23983	141223	9822.92
F2	20	47114.2	7293.15	23530.2	134314	3442.88
F3	20	34460.9	5749.94	24350.9	136456	3273.27
F4	20	39327.8	6684.06	25063.6	132719	3148.13
F5	20	36373.9	6258.6	25549.5	132959	2681.13
F6	20	63365.5	11678.7	30114.4	139131	7069.08
F7	20	30839.5	5640.79	25723	132370	4012.6
F8	20	33053.7	5507.13	24316	126054	3076.13
F9	20	36230.6	6985.85	24438	128596	4484.52
F10	20	45100.2	8477.2	23016.6	128766	4196.74
F11	20	43669.8	7764	21902.4	130891	2863.49
F12	20	68934.4	13820.8	24953.9	141883	7564.04
G1	20	39628.9	5962.07	21049.3	139247	3910.25
G2	20	50468.6	8226.86	24362.8	143433	3583.78
G3	20	37673.1	6415.25	23966.4	136644	3532.59
G4	20	31836.4	5181.07	23859.3	132878	2876.65
G5	20	29996	4977.06	24407.2	132257	2985.8
G6	20	31379.6	5376.4	24866.4	131475	2621.38
G7	20	31078.1	5218.66	23323.5	124422	2630.75
G8	20	36998.5	6605.2	25007.7	132206	4525.18
G9	20	41153.1	6442.01	23658.8	128253	3611.77
G10	20	54561.2	10001.4	24126.2	127544	4107.17
G11	20	73313.7	12383.3	24935.5	133179	8092.83
G12	20	46732.5	7494.62	22484.1	147772	3772.23
H1	20	57170.5	9254.6	23825.2	153790	8847.23
H2	20	41143.7	7096.36	23959.7	154467	3582.75
H3	20	37369.7	6854.28	24449.3	145098	4807.78
H4	20	35343.9	6442.98	25333.1	142908	3164.29
H5	20	34388.2	6163.34	25070.5	140374	3105.46
H6	20	41314.9	6876.73	23905	128178	4812.65
H7	20	31204.3	7090.88	4440.56	6114.08	3597.3
H8	20	31887.5	5187.47	3479.63	5957.3	3636.71
H9	20	34854.3	5443.29	3461.44	5645.34	2906.71
H10	20	42436.7	9778.93	7188.26	9695.46	6036.59
H11	20	40303.6	6372.34	4081.5	6409.99	3649.95
H12	20	44807.2	5615.5	3595.45	5913.68	3034.32
A1	21	20126.6	3918.4	13843.7	99906.5	2999.93
A2	21	35901.9	5632.17	19312.4	126632	3606.63
A3	21	33075.6	5697.07	20747.9	127268	2815.72
A4	21	40006.4	6450.69	20850.8	118896	2860.16
A5	21	40722.9	6628.56	22211.2	124123	3092.13
A6	21	48555.8	10076.8	25339.8	132274	5497.94
A7	21	45725.5	8535.88	23834.2	128116	5132.93
A8	21	208229	34856.8	76547	382675	23429.4
A9	21	45141.9	10506.7	24300.3	132519	4079.35
A10	21	44324.6	8952.97	21697.3	131232	5137.98
A11	21	44825.7	8344.12	20437.8	135175	3511.27
A12	21	54590.5	10247.7	19880.1	135639	4948.11
B1	21	36749.5	5740.61	19619.4	130819	4031.34
B2	21	44749	7568.68	22555.9	136222	4404.65
B3	21	33817	7158.9	23545	131521	3847.88
B4	21	40922.6	6831.75	22499.2	126623	3804.56
B5	21	43906.8	6864.43	25904.1	146391	4336.99
B6	21	36188.2	5747.49	23091.5	125474	2800.62
B7	21	31436.8	5415.35	24309.4	131405	3300.26
B8	21	118635	18435.7	75787.7	422747	11914.9
B9	21	41421.9	7572.93	25264.3	138315	3669.36
B10	21	66394.3	11748.9	24512.4	139843	3977.78
B11	21	71477.4	12790.9	24128.9	143019	5705.32
B12	21	111704	19598.6	26606	153085	8768.13
C1	21	40243.1	6778.11	21068.1	131104	4092.24
C2	21	47335.7	7508.43	28513.1	173148	5253.21
C3	21	37749.7	5263	23215.7	131154	3208.44
C4	21	37775.4	6321.38	23168.3	124465	3673.38
C5	21	38553.6	6203.86	24389.2	125548	3715.3
C6	21	43651.7	6198.21	23889.6	127583	2428.78
C7	21	33137.3	5506.89	24727.8	126817	2673.1
C8	21	37506.3	6210.42	25274	130132	3391.21
C9	21	48613.6	9701.84	25793.2	128770	4514.08
C10	21	50185.5	9932.57	24374.8	133845	4387.7
C11	21	47242.7	9334.07	22358.1	131637	2670.49
C12	21	59723.2	11024.9	22277.6	138922	3805.26
D1	21	43614.4	6952.11	21738.8	133956	3603.8
D2	21	35269	5517.84	22417.5	131266	3515.92
D3	21	47586.8	8478.56	25819.5	133016	6094.62
D4	21	40206.2	7235.89	23922	122825	4760.46
D5	21	43907.6	7645.62	24949.2	125374	3602.92
D6	21	47078.3	8111.42	24812.9	119894	5407.96
D7	21	28531.2	4960.55	22732.3	113676	2669.45
D8	21	30354.7	6251.65	25299.8	127267	3144.83
D9	21	36520.3	9443.32	24478.3	121755	4123.47
D10	21	62451.2	11342.5	24551.3	128054	4819.61
D11	21	68661	15905.7	23587.1	130141	3670.85
D12	21	166295	23598.2	29077.3	143300	8206.99
E1	21	60366.4	12869	21879.5	131365	4841.54
E2	21	42961.9	7240.51	22143.5	125590	3781.63
E3	21	70813.6	9716.62	26576.1	135631	7536.27
E4	21	40822.6	8177.11	25972.9	133331	4054.78
E5	21	33848.2	5721.66	24253.1	125653	3539.55
E6	21	168073	27090.2	36291	139539	14841.9
E7	21	46254.9	8559.9	25484.4	121055	7896.36
E8	21	36432.8	7026.62	25685.2	125811	4826.33
E9	21	39284.5	10563.4	28778.9	129164	4017.06
E10	21	50940	10341.3	24342.3	126788	4558.44
E11	21	49308.1	9688.35	22574	125406	6367.74
E12	21	66992	12475.4	22908.8	133281	5757.61
F1	21	47151.2	8864.95	23984.3	140928	9739.99
F2	21	47141.4	7638.15	23342.3	134734	3946.69
F3	21	34308.6	5977.18	24287.1	136096	3475.09
F4	21	40809.5	6851.63	25199.9	132786	3405.55
F5	21	38137.8	6225.4	25426.4	133209	2724.38
F6	21	65005.6	11833.6	30217.2	138983	6988.57
F7	21	30697.8	5324.34	25836.7	132011	4268.18
F8	21	33130.8	5705.04	24418.5	126068	2761.1
F9	21	36476.9	6936.77	24409.8	128544	4395.19
F10	21	47218.9	8642.94	23067.2	128957	4176.64
F11	21	45496.3	8086.95	21853.9	131158	2930.15
F12	21	70565.1	13989	24990.7	141915	7585.56
G1	21	39956.4	6080.44	21046.7	139465	3917.98
[truncated: 10,487 more rows]

## Sheet: Multicomponent Data
Block Type	96alum
Chemistry	SYBR_GREEN
Experiment File Name	D:\ShuJu\LZM\spx6-10zuzhichayibiaoda.eds
Experiment Run End Time	2023-07-14 07:20:09 AM CST
Instrument Type	sds7500
Passive Reference	ROX
Well	Cycle	SYBR	ROX
A1	1	19603.6	101022
A2	1	34757.3	127416
A3	1	31256.8	127592
A4	1	38563.1	119731
A5	1	38963.2	125774
A6	1	46217.4	131887
A7	1	44691	129746
A8	1	201017	385366
A9	1	43460.8	133619
A10	1	42221.1	133027
A11	1	43860.3	137889
A12	1	52075.9	136146
B1	1	36369	131778
B2	1	42990	137298
B3	1	32991.6	132697
B4	1	37453.1	128431
B5	1	40526.3	149382
B6	1	32866.9	128353
B7	1	33028.6	134843
B8	1	124147	432990
B9	1	43210.2	141247
B10	1	55342.8	141647
B11	1	58684.8	145790
B12	1	88188.6	152462
C1	1	37869.3	130793
C2	1	45427.8	173878
C3	1	37546.9	132784
C4	1	38050.6	126958
C5	1	39251.7	129322
C6	1	42521.3	122467
C7	1	34444.3	131236
C8	1	39254.2	134558
C9	1	50930.7	132103
C10	1	49153.4	135705
C11	1	45174	133991
C12	1	55455.8	139133
D1	1	41768.4	133911
D2	1	34354.6	131786
D3	1	47596.2	134839
D4	1	38733.2	125137
D5	1	41635.9	129858
D6	1	44824	123033
D7	1	29867.6	118284
D8	1	31742.3	131915
D9	1	38749.7	125688
D10	1	59018.7	130651
D11	1	59943	132560
D12	1	146244	141843
E1	1	52963.3	131963
E2	1	41687.6	126026
E3	1	71967.2	137155
E4	1	41443.4	135000
E5	1	34901.1	129090
E6	1	177675	145215
E7	1	48714.7	125296
E8	1	37809.9	130099
E9	1	40969	132302
E10	1	51609	128793
E11	1	48898.3	127144
E12	1	61861	134340
F1	1	46210.9	142573
F2	1	40379	135765
F3	1	33695.5	137191
F4	1	38128.7	134738
F5	1	36204.3	135045
F6	1	63853.8	142023
F7	1	32189.6	135413
F8	1	34444.9	129168
F9	1	37649.8	131092
F10	1	43924.3	130753
F11	1	42322.5	132088
F12	1	65225.2	142196
G1	1	38722.9	140754
G2	1	47375.4	145928
G3	1	35214.8	138270
G4	1	30407.7	134875
G5	1	28524.6	134790
G6	1	29739.9	134180
G7	1	27587.4	127157
G8	1	33065.4	134482
G9	1	37501.8	130276
G10	1	48086.3	129513
G11	1	65275.8	134940
G12	1	40775.2	149360
H1	1	53712.1	154787
H2	1	39651.6	156188
H3	1	35910.7	146454
H4	1	32961.7	144785
H5	1	32209.4	142041
H6	1	37975.7	129121
H7	1
H8	1
H9	1
H10	1
H11	1
H12	1
A1	2	19615.9	100933
A2	2	34863.8	126653
A3	2	31156.8	127657
A4	2	38125.7	119405
A5	2	39304.4	125626
A6	2	46741.5	131104
A7	2	45504.6	129848
A8	2	203473	386788
A9	2	44191.1	133675
A10	2	42845.7	133041
A11	2	43454.8	137559
A12	2	52244.7	136403
B1	2	36538.4	131535
B2	2	43045	135920
B3	2	33519.4	132005
B4	2	37674	127585
B5	2	40433	148182
B6	2	32656.8	126938
B7	2	32712.3	133189
B8	2	122270	428918
B9	2	43144.5	140069
B10	2	55694.6	140566
B11	2	59108.8	144246
B12	2	91291.9	153299
C1	2	38167.9	131049
C2	2	45900	173062
C3	2	37459.8	131985
C4	2	38039.9	125979
C5	2	38718.3	128044
C6	2	42642.7	122619
C7	2	34321.6	129295
C8	2	39106.5	132486
C9	2	50856	130911
C10	2	48603.1	134480
C11	2	45109	132558
C12	2	56367.7	139977
D1	2	42152	133679
D2	2	34516.2	131333
D3	2	46929.1	134010
D4	2	38521.4	124264
D5	2	41383.9	128297
D6	2	44796.2	121637
D7	2	29608.7	116625
D8	2	31513.3	129924
D9	2	38286.8	124458
D10	2	58297.4	128888
D11	2	60261.2	130973
D12	2	148168	142479
E1	2	53865.8	132113
E2	2	41506.1	125662
E3	2	71692	136386
E4	2	40948.6	133903
E5	2	34379.8	127692
E6	2	175050	143375
E7	2	48399	123703
E8	2	37449.5	127871
E9	2	40704.7	130834
E10	2	50944	127226
E11	2	48869.4	125377
E12	2	62906.1	134769
F1	2	46724.8	141526
F2	2	41450.3	134432
F3	2	33900.7	136485
F4	2	38347.9	133348
F5	2	36049.9	133945
F6	2	63068.5	140966
F7	2	31816.4	133966
F8	2	34104.6	128048
F9	2	36921	129703
F10	2	43642.2	129422
F11	2	42105.1	131069
F12	2	65951	143184
G1	2	38476.8	140217
G2	2	47707.4	144015
G3	2	35414.1	137072
G4	2	30467.7	133646
G5	2	28556.5	133487
G6	2	29756.9	132950
G7	2	27726.6	125923
G8	2	33349.4	133711
G9	2	37369	129080
G10	2	49232.3	128460
G11	2	65226.2	133889
G12	2	41120.5	149323
H1	2	54143.4	155395
H2	2	39468.3	155920
H3	2	35586.6	145753
H4	2	33453.2	144546
H5	2	32365.1	141694
H6	2	38698.3	129343
H7	2
H8	2
H9	2
H10	2
H11	2
H12	2
A1	3	19897	101432
A2	3	34592.3	127015
A3	3	30902.4	127476
A4	3	39196.5	118990
A5	3	39332.4	125259
A6	3	46988.5	129951
A7	3	45806.8	129732
A8	3	206558	385623
A9	3	44523.5	133660
A10	3	43142.2	132498
A11	3	43668.9	136988
A12	3	53050.6	137397
B1	3	35820	131605
B2	3	43582.5	136027
B3	3	33549.5	131527
B4	3	37599.9	127214
B5	3	40169.7	147422
B6	3	32467.7	126428
B7	3	32629.8	132575
B8	3	122208	426568
B9	3	42947.3	139196
B10	3	55820.7	140295
B11	3	58764.2	143539
B12	3	92084.5	153908
C1	3	38654.8	130979
C2	3	46465.6	172923
C3	3	37838.2	131480
C4	3	37997.8	125641
C5	3	38595.6	127602
C6	3	42738.2	122295
C7	3	34144.9	128596
C8	3	38716.3	132061
C9	3	50742.9	130091
C10	3	48438.4	134192
C11	3	45647.1	132315
C12	3	56620.4	140034
D1	3	42373.6	133892
D2	3	34930.5	131419
D3	3	46777.7	133637
D4	3	38268.9	123484
D5	3	41082.1	127228
D6	3	44608.5	121255
D7	3	29334.5	115726
D8	3	31271.7	128769
D9	3	38076.1	123463
D10	3	58231.7	128711
D11	3	61103.1	130897
D12	3	149347	142767
E1	3	54328.9	131133
E2	3	41383.3	125147
E3	3	71381	136022
E4	3	41090.2	133638
E5	3	34354.7	127122
E6	3	173565	142859
E7	3	48055.2	123095
E8	3	37164.1	127214
E9	3	40501.5	130453
E10	3	51029.6	127508
E11	3	48804.3	125725
E12	3	62654.2	134456
F1	3	46789.5	141336
F2	3	42316.6	134316
F3	3	34144.7	135986
F4	3	38189.8	133127
F5	3	36050.5	133545
F6	3	63092.2	140423
F7	3	31778.7	133377
F8	3	33935	127319
F9	3	37282.9	129461
F10	3	43557	129252
F11	3	42064.4	131017
F12	3	66095.9	142715
G1	3	38993	140044
G2	3	47840	143771
G3	3	35743.2	136584
G4	3	30500.2	133374
G5	3	28676.3	133074
G6	3	30139.8	132450
G7	3	27782.4	125137
G8	3	33274.5	132842
G9	3	37623.9	128643
G10	3	49715.2	128199
G11	3	65764.1	133301
G12	3	41374.9	149005
H1	3	54686.5	155087
H2	3	39607.7	155224
H3	3	35479.1	145392
H4	3	33068.6	143842
H5	3	32621.1	140773
H6	3	38886.9	128915
H7	3
H8	3
H9	3
H10	3
H11	3
H12	3
A1	4	19859	101109
A2	4	34982	126553
A3	4	31410.9	127027
A4	4	39114.9	119079
A5	4	39492.4	124917
A6	4	46790.6	130228
A7	4	46190.7	128880
A8	4	206729	385027
A9	4	44805.2	133199
A10	4	43139.8	132148
A11	4	44256.9	136877
A12	4	52325.4	137585
B1	4	35933.8	131500
B2	4	43953.4	135984
B3	4	33661.4	131830
B4	4	37388.1	127099
B5	4	39910.1	147785
B6	4	32435.5	126096
B7	4	32379.1	132336
B8	4	121315	427349
B9	4	43062.4	139239
B10	4	55751.4	140151
B11	4	59076.2	144138
B12	4	93156.9	153587
C1	4	39022.1	130908
C2	4	46649.6	173626
C3	4	37612	131448
C4	4	37658.4	125462
C5	4	38447.2	127312
C6	4	42813.6	122366
C7	4	34099.5	128487
C8	4	38712.2	131825
C9	4	50295.4	129904
C10	4	48672.5	134355
C11	4	45234.8	132132
C12	4	57279.5	139958
D1	4	42505	133683
D2	4	35076	131150
D3	4	46637.3	133775
D4	4	38369.7	123586
D5	4	41435.3	127034
D6	4	44392.8	121164
D7	4	29144.9	115614
D8	4	31611	128810
D9	4	37945.5	122982
D10	4	57975	128723
D11	4	61039.7	130808
D12	4	151410	142722
E1	4	55288.1	131400
E2	4	41862.6	125641
E3	4	70932.8	136009
E4	4	40919.3	134055
E5	4	34364.1	127018
E6	4	172262	142569
E7	4	47746.6	122843
E8	4	36849.3	127341
E9	4	40671.3	130576
E10	4	50759.2	127344
E11	4	49018	125583
E12	4	63155.6	134375
F1	4	46978.5	141649
F2	4	42953.1	134675
F3	4	34211.4	136453
F4	4	38386.3	133322
F5	4	35742.5	133670
F6	4	62773.8	140426
F7	4	31663.6	132986
F8	4	33676.7	127265
F9	4	37102.7	129474
F10	4	43431	129150
F11	4	42149.4	131008
F12	4	66522.1	142819
G1	4	38253.6	139741
G2	4	47662.9	143538
G3	4	35775.1	136352
G4	4	30508.7	133468
G5	4	28417.5	132814
G6	4	29900.1	132327
G7	4	27597.6	125653
G8	4	33111.9	133144
G9	4	37748	128932
G10	4	50219.6	128469
G11	4	66173	133467
G12	4	41333.4	148845
H1	4	54583.4	155471
H2	4	39640.8	155243
H3	4	35501.4	145100
H4	4	33587.6	143669
H5	4	32845.8	140763
H6	4	39137.3	128790
H7	4
H8	4
H9	4
H10	4
H11	4
H12	4
A1	5	20020.5	101290
A2	5	34794.9	126265
A3	5	31464.8	127417
A4	5	39267.9	119253
A5	5	39753.1	125005
A6	5	46983.9	130569
A7	5	45929	129431
A8	5	206942	385652
A9	5	44730.9	133105
A10	5	42841.5	131901
A11	5	43563.7	136860
A12	5	52404.2	137264
B1	5	36283	131069
B2	5	43871.1	136191
B3	5	33662.6	131961
B4	5	37573.2	127437
B5	5	40211.3	147458
B6	5	32474.8	126524
B7	5	32435	132381
B8	5	121566	426048
B9	5	42868.9	139184
B10	5	55423.6	140600
B11	5	59108.2	143453
B12	5	94729.2	153367
C1	5	39225.2	130858
C2	5	46785	173875
C3	5	37464.5	131379
C4	5	38059	125162
C5	5	38404.7	127090
C6	5	42366.6	122571
C7	5	33788.1	128415
C8	5	38668.8	131580
C9	5	49963.9	129792
C10	5	48581.2	134186
C11	5	45324.6	132180
C12	5	57951.6	139859
D1	5	42379.8	133801
D2	5	34902.3	131224
D3	5	46939.5	133686
D4	5	37826	123704
D5	5	40755.6	127102
D6	5	44637.8	121232
D7	5	29059.8	115192
D8	5	31469.3	128664
D9	5	37504.7	122984
D10	5	57938.2	128691
D11	5	62121.8	130885
D12	5	152466	142757
E1	5	55667.4	131251
E2	5	42059.8	125294
E3	5	70820.9	136329
E4	5	40418.4	133876
E5	5	33916.4	126932
E6	5	171640	142412
E7	5	47497.8	122909
E8	5	36768.6	127203
E9	5	40348.6	130678
E10	5	50598.5	127316
E11	5	48893.5	125818
E12	5	63094.2	134239
F1	5	47153.4	141303
F2	5	43323.3	134329
F3	5	34436	136145
F4	5	38525.9	133410
F5	5	35585.4	133453
F6	5	62911.1	140582
F7	5	31820.2	133125
F8	5	33703.5	127114
F9	5	36976.4	129337
F10	5	43472.4	129421
F11	5	42163.2	131247
F12	5	67039.6	142884
G1	5	38929.2	139953
G2	5	48163.3	143784
G3	5	36257	136980
G4	5	30513.7	133504
G5	5	28483.5	132991
G6	5	30028.6	132391
G7	5	27762.5	125453
G8	5	33151.5	133096
G9	5	37758.1	128724
G10	5	50399.9	128461
G11	5	66477.7	134007
G12	5	41493.3	149001
H1	5	54378.6	154755
H2	5	39059	155500
H3	5	35596.6	144974
H4	5	33546.8	143483
H5	5	33055.2	141064
H6	5	39292	128635
H7	5
H8	5
H9	5
H10	5
H11	5
H12	5
A1	6	19678.5	100879
A2	6	34954.8	126489
A3	6	32085.1	127122
A4	6	39058	118903
A5	6	39862.8	125239
A6	6	46685.9	130477
A7	6	46454.6	129197
A8	6	207070	386548
A9	6	45082.5	132836
A10	6	43355	131806
A11	6	43620.9	136192
A12	6	52951.3	137642
B1	6	36629.8	130963
B2	6	43784.8	136387
B3	6	33595.1	132044
B4	6	37081.2	126848
B5	6	39321.1	147577
B6	6	32276.1	126242
B7	6	32064.7	132225
B8	6	120960	426349
B9	6	42852.5	139043
B10	6	55720.5	139737
B11	6	59047.3	143920
B12	6	95714.5	153597
C1	6	39432.3	131235
C2	6	46582.4	173836
C3	6	37443.9	131498
C4	6	37657.1	125457
C5	6	38276.9	127065
C6	6	42525.7	122829
C7	6	33781.4	128227
C8	6	38350.2	131721
C9	6	50059.2	129935
C10	6	48551	134500
C11	6	45557.6	132314
C12	6	58052.8	139769
D1	6	42718.9	133523
D2	6	34665.5	131213
D3	6	46545.4	133394
D4	6	37792.5	123315
D5	6	40828.8	126396
D6	6	44477.7	120750
D7	6	29019.7	115411
D8	6	31190.2	128498
D9	6	37271.9	122582
D10	6	57727.4	128682
D11	6	61917.2	131238
D12	6	154136	143472
E1	6	56695	131149
E2	6	41950.6	125348
E3	6	70914.7	135967
E4	6	40191	134025
E5	6	33965.2	126714
E6	6	170977	142191
E7	6	47516.2	122452
E8	6	36672.7	127093
E9	6	40311.5	130352
E10	6	50712.9	127587
E11	6	48698.2	126200
E12	6	63655.4	134142
F1	6	47163.9	141488
F2	6	43778	134487
F3	6	34317.6	136235
F4	6	38364.5	133268
F5	6	35791.4	133390
F6	6	62496	140525
F7	6	31700.3	132934
F8	6	33633.6	126960
F9	6	36648.4	129332
F10	6	43301.3	129352
F11	6	42461.3	131108
F12	6	66880	142807
G1	6	38639.6	139204
G2	6	48091.8	144099
G3	6	36240.9	136877
G4	6	30502.7	133447
G5	6	28629.5	133251
G6	6	30094	132364
G7	6	27769.7	125393
G8	6	33198	133095
G9	6	37702.6	128941
G10	6	50509.7	128282
G11	6	66493.5	133780
G12	6	41293.5	149047
H1	6	54884	155477
H2	6	39163.1	154969
H3	6	35336.5	144783
H4	6	33549.6	143642
H5	6	32897.4	140855
H6	6	39334.2	128892
H7	6
H8	6
H9	6
H10	6
H11	6
H12	6
A1	7	19464.2	100820
A2	7	34802.2	126625
A3	7	31624.8	127429
A4	7	39199.8	119423
A5	7	39667.7	124670
A6	7	46552.8	130500
A7	7	46391.9	129372
A8	7	208531	385337
A9	7	45111.7	132832
A10	7	43163.3	131898
A11	7	44073.4	136269
A12	7	53147.7	137429
B1	7	36554.8	130876
B2	7	43829.2	136254
B3	7	33590.4	132233
B4	7	36875.2	127271
B5	7	39801.5	147611
B6	7	32572.3	126012
B7	7	32105.2	132373
B8	7	120729	424551
B9	7	42504.4	139008
B10	7	55804.5	140610
B11	7	59058.4	143237
B12	7	96013.1	153280
C1	7	39815	131308
C2	7	46840.5	173812
C3	7	37604.4	131678
C4	7	37471.5	125401
C5	7	38356.4	126869
C6	7	42434.3	123235
C7	7	33598.5	128232
C8	7	38380.6	131541
C9	7	49621.4	129846
C10	7	48439.3	134443
C11	7	45495.4	132145
C12	7	57797.5	140242
D1	7	42619.1	133836
D2	7	35150.7	131357
D3	7	46249.8	133826
D4	7	38060.8	123702
D5	7	40992.1	126750
D6	7	44433.5	120694
D7	7	29188	115164
D8	7	31182.4	128558
D9	7	37461.6	122591
D10	7	58040.7	128718
D11	7	62374.4	131124
D12	7	154899	143470
E1	7	56791.9	131238
E2	7	42348.3	125538
E3	7	70519.9	136383
E4	7	40254.8	133786
E5	7	34239	126950
E6	7	170674	142050
E7	7	47632.3	122759
E8	7	36909.4	127065
E9	7	40222.7	130456
E10	7	50795.1	127576
E11	7	48667.5	125730
E12	7	63687.3	134036
F1	7	47348.4	141558
F2	7	44158.9	134694
F3	7	34225.8	136623
F4	7	38449.1	133556
F5	7	35648.5	133762
F6	7	62524.7	140428
F7	7	31776.6	132873
F8	7	33560.7	127100
F9	7	36526.7	129396
F10	7	43559.3	129245
F11	7	42090.7	131003
F12	7	67073.3	142455
G1	7	38657.3	139650
G2	7	48319.9	144372
G3	7	36654.8	136751
G4	7	30574.2	133308
G5	7	28517.6	133082
G6	7	30193.5	132265
G7	7	27662.6	125179
G8	7	33037.9	133070
G9	7	37843.1	129118
G10	7	50955.3	128379
G11	7	66541.2	133680
G12	7	41790.8	148636
H1	7	53916.1	155245
H2	7	39127.3	155058
H3	7	35569	145081
H4	7	33559.2	143400
H5	7	33152.2	140950
H6	7	39671.8	128734
H7	7
H8	7
H9	7
H10	7
H11	7
H12	7
A1	8	19748	100811
A2	8	35852.1	126904
A3	8	31653.4	127128
A4	8	38851.2	119380
A5	8	39502	124849
A6	8	46410.6	130942
A7	8	46461.6	129049
A8	8	209560	384751
A9	8	45427.9	133301
A10	8	43051.2	131855
A11	8	43448	136391
A12	8	52978.9	137472
B1	8	36732.7	130814
B2	8	43731.7	136348
B3	8	33333.7	132242
B4	8	37026.9	127173
B5	8	39658	147370
B6	8	32333.4	126199
B7	8	32006.8	132163
B8	8	120406	426600
B9	8	42431.3	139355
B10	8	55192.8	140555
B11	8	59387	143804
B12	8	96703.2	153540
C1	8	39942.1	131244
C2	8	46889.6	174166
C3	8	37675.7	131394
C4	8	37576.1	125209
C5	8	38373.6	127080
C6	8	42681.2	123605
C7	8	33731.4	128287
C8	8	38351.3	131408
C9	8	49777.5	130011
C10	8	48735.4	134352
C11	8	45388.2	132429
C12	8	57877.9	139436
D1	8	42727.5	133974
D2	8	34897	131461
D3	8	46628.5	133920
D4	8	37876	123684
D5	8	40817.6	126593
D6	8	44238.9	120807
D7	8	29205.1	115231
D8	8	31138.8	128409
D9	8	37320.3	122848
D10	8	57959.6	128365
D11	8	62815.1	131226
D12	8	155942	143258
E1	8	57024.1	131192
E2	8	42491.8	125587
E3	8	70480	136266
E4	8	40316.2	134252
E5	8	34002.6	126587
E6	8	170372	142007
E7	8	47554.9	122667
E8	8	36629	126797
E9	8	40008.6	130429
E10	8	50458.2	127617
E11	8	48910.3	126183
E12	8	63895.3	133770
F1	8	46891.1	141540
F2	8	44312.9	135069
F3	8	34392.2	136674
F4	8	38394.3	133914
F5	8	35568.2	133991
F6	8	62536	140406
F7	8	31584.5	133153
F8	8	33688.6	127107
F9	8	36374	129677
F10	8	43330.1	129336
F11	8	42644.1	131095
F12	8	67242.5	142645
G1	8	38547.8	139891
G2	8	48485.5	143924
G3	8	36499.4	137080
G4	8	30556.9	133323
G5	8	28499.3	133321
G6	8	30164.1	132581
G7	8	27609.2	125275
G8	8	32974.3	133003
G9	8	37696.3	129102
G10	8	50731	128382
G11	8	66704	133775
G12	8	41492.2	148546
H1	8	54272.9	154909
H2	8	39292.8	154956
H3	8	35289.4	144976
H4	8	33933.8	143670
H5	8	33106	140888
H6	8	40063.9	128674
H7	8
H8	8
H9	8
H10	8
H11	8
H12	8
A1	9	20024.5	100517
A2	9	34869.6	126384
A3	9	32328.7	127190
A4	9	39644.4	119399
A5	9	39791.3	124946
A6	9	46791.7	130936
A7	9	46205.4	129092
A8	9	208782	385633
A9	9	45439.8	133183
A10	9	43100.6	131807
A11	9	43308.4	136034
A12	9	52892.2	137138
B1	9	36080.6	131231
B2	9	43837.9	136579
B3	9	33481.7	132247
B4	9	36997.8	127237
B5	9	39820.6	147809
B6	9	32128.7	126306
B7	9	32089.9	132332
B8	9	120955	425803
B9	9	42534.1	139182
B10	9	55462.4	140242
B11	9	59310.8	143597
B12	9	97278.1	153677
C1	9	39457.6	131697
C2	9	46842.4	174376
C3	9	37411	132071
C4	9	37533.2	125866
C5	9	38162.9	126839
C6	9	42405	124199
C7	9	33617.2	128151
C8	9	38242.1	131509
C9	9	49708	130099
C10	9	48858.4	134959
C11	9	45487.7	132375
C12	9	58066.3	140116
D1	9	42687	134036
D2	9	35113.2	131791
D3	9	46520.8	134055
D4	9	37943.6	123707
D5	9	40868.8	126687
D6	9	44213.9	121243
D7	9	28640.5	115328
D8	9	30899	128476
D9	9	37188.4	123207
D10	9	57600.8	129010
D11	9	62857.4	131101
D12	9	156734	143377
E1	9	57855.6	131237
E2	9	42345.2	126218
E3	9	70576.7	136331
E4	9	40233.3	134113
E5	9	34006.3	127152
E6	9	170198	141880
E7	9	47138	122551
E8	9	36754.9	127125
E9	9	39929.5	130432
E10	9	50460.1	127680
E11	9	48686.6	125936
E12	9	63918.6	134112
F1	9	47069.1	141883
F2	9	44582.9	135091
F3	9	34172.5	136750
F4	9	38521.6	133917
F5	9	35749.2	133873
F6	9	62470.3	140688
F7	9	31570.5	133155
F8	9	33237.2	127062
F9	9	36570.4	129351
F10	9	43446.8	129363
F11	9	42150	131544
F12	9	67479.2	142761
G1	9	38933.3	139621
G2	9	48425.7	144194
G3	9	36692.8	136845
G4	9	30583.9	133666
G5	9	28718.8	133327
G6	9	30093.9	132539
G7	9	27868.8	125162
G8	9	33117.1	133313
G9	9	37746.4	129109
G10	9	50787.1	128580
G11	9	66810.5	133788
G12	9	41387.3	149292
H1	9	54313	154957
H2	9	39268	155396
H3	9	35167.7	145239
H4	9	33941.7	143850
H5	9	33296.2	140948
H6	9	39899.2	129179
H7	9
H8	9
H9	9
H10	9
H11	9
H12	9
A1	10	19829.4	100525
A2	10	35186	126788
A3	10	32016.8	127542
A4	10	38929.1	119343
A5	10	40125.9	124811
A6	10	46653.1	131731
A7	10	46579.5	129133
A8	10	209926	386088
A9	10	45333.8	132903
A10	10	43132.2	131895
A11	10	43797.6	135944
A12	10	53065.5	137146
B1	10	36630.5	131318
B2	10	44400.8	136574
B3	10	33530.9	132147
B4	10	36887.5	127454
B5	10	39429.8	147666
B6	10	31935.5	125991
B7	10	32216.9	132142
B8	10	119758	426275
B9	10	42287.6	139418
B10	10	55982.4	140598
B11	10	59263.3	143820
B12	10	97192.5	153806
C1	10	39677.2	131670
C2	10	46886.8	174306
C3	10	37505.5	131817
C4	10	37263.7	125543
C5	10	38211.1	127030
C6	10	42523.6	124386
C7	10	33672.9	127793
C8	10	38058.6	131620
C9	10	49626.5	129680
C10	10	48645.7	134931
C11	10	45766.8	132503
C12	10	58140.3	139705
D1	10	42819.5	133912
D2	10	35492.7	131408
D3	10	46367.3	133960
D4	10	37680.1	123971
D5	10	40814.3	126561
D6	10	44182.9	121046
D7	10	29164.4	115082
D8	10	30854.4	128730
D9	10	37195.3	122791
D10	10	57489.7	128775
D11	10	63397.4	131521
D12	10	157315	143666
E1	10	57849	131428
E2	10	42179.8	125968
E3	10	70440.2	136347
E4	10	40311.5	134022
E5	10	33961.7	126825
E6	10	170029	141886
E7	10	47231.5	122487
E8	10	36228.1	127007
E9	10	39990.5	130532
E10	10	50585.3	128072
E11	10	49028.5	126194
E12	10	64214	134026
F1	10	47227.5	141641
F2	10	44734	134986
F3	10	34266	136779
F4	10	38384.2	133671
F5	10	35537.2	133724
F6	10	62251.5	140546
F7	10	31166.7	132937
F8	10	33441.1	127196
F9	10	36361.3	129652
F10	10	43250	129893
F11	10	42511.8	131691
F12	10	67156.4	142878
G1	10	38791.2	139914
G2	10	48616.6	144353
G3	10	36645.3	137059
G4	10	30389.3	133439
G5	10	28540.9	133350
G6	10	30102.1	132460
G7	10	27488.6	125325
G8	10	33061.3	133108
G9	10	37672.7	128972
G10	10	50753.6	128557
G11	10	66962.2	133897
G12	10	41705.2	148578
H1	10	54339.3	154949
H2	10	39321.4	154831
H3	10	35129.9	145505
H4	10	33723.5	143857
H5	10	33464.1	141149
H6	10	40198.2	129033
H7	10
H8	10
H9	10
H10	10
H11	10
H12	10
A1	11	19830.4	100411
A2	11	35234.5	126678
A3	11	31949.7	127536
A4	11	39215.8	119070
A5	11	40181.9	124800
A6	11	46610.4	131686
A7	11	46255.9	128960
A8	11	209085	386542
A9	11	45341.8	133139
A10	11	43613.7	131676
A11	11	43705	135937
A12	11	52863.9	137078
B1	11	35999.8	131159
B2	11	44534.2	136954
B3	11	33595.9	132343
B4	11	36889.7	127097
B5	11	39487.3	147804
B6	11	31874.8	126174
B7	11	32019.8	132309
B8	11	120329	426780
B9	11	42353.6	138919
B10	11	55305	140534
B11	11	59461.4	143730
B12	11	97596.8	152910
C1	11	39781.1	131295
C2	11	47134.6	174311
C3	11	37083.3	131533
C4	11	37502.3	125361
C5	11	37919.3	127018
C6	11	42838.2	124225
C7	11	33549.1	128060
C8	11	38113.2	131330
C9	11	49752.4	129738
C10	11	48334.2	134736
C11	11	45477.3	132314
C12	11	57916.8	140099
D1	11	42845.4	133757
D2	11	34992.7	131777
D3	11	46535.5	133619
D4	11	37489.3	123811
D5	11	40502.7	126481
D6	11	44118.6	120915
D7	11	29100.4	114966
D8	11	30871.5	128503
D9	11	37325.1	122837
D10	11	57485.5	128779
D11	11	63470.3	130972
D12	11	157706	143781
E1	11	58650.7	131598
E2	11	42573.5	125971
E3	11	70448.7	136532
E4	11	40425	134268
E5	11	33640.8	126633
E6	11	169953	141518
E7	11	47234.6	122307
E8	11	36608.8	127026
E9	11	39993.4	130311
E10	11	50597.3	127979
E11	11	48929.8	126021
E12	11	64499.3	133956
F1	11	46984.1	141643
F2	11	44610.3	135053
F3	11	34432.9	136692
F4	11	38158.6	133669
F5	11	35396.2	133859
F6	11	62216.1	140632
F7	11	31475.6	133085
F8	11	33326.3	126919
F9	11	36239.9	129591
F10	11	43436.5	129373
F11	11	42304.5	131574
F12	11	67351.6	142977
G1	11	39174.9	139765
G2	11	48493	144120
G3	11	36778.2	137229
G4	11	30599.5	133282
G5	11	28601.3	133156
G6	11	30118.7	132390
G7	11	27914.4	125227
G8	11	32983.1	133086
G9	11	37622	129145
G10	11	50795	128376
G11	11	67155.2	134119
G12	11	41404.9	148592
H1	11	54916.5	155314
H2	11	38815.4	155282
H3	11	35756.6	145180
H4	11	34017.1	143699
H5	11	33390.4	141213
H6	11	40054.5	129015
H7	11
H8	11
H9	11
H10	11
H11	11
H12	11
A1	12	19722.4	100562
A2	12	35209.6	126706
A3	12	31989.7	128096
A4	12	38931.4	119152
A5	12	39902.4	124510
A6	12	46539.6	131278
A7	12	46271.2	129008
A8	12	208178	386140
A9	12	45595.4	133164
A10	12	43128.2	131855
A11	12	43546.5	135921
A12	12	53043.2	136713
B1	12	36559.4	131341
B2	12	44237.4	136836
B3	12	33511.5	132331
B4	12	36752.6	127769
B5	12	39490.7	147478
B6	12	32182.5	125957
B7	12	32019.4	132310
B8	12	119274	425259
B9	12	42465.9	139443
B10	12	55462.8	140643
B11	12	59520	143771
B12	12	98195.4	153917
C1	12	39995.7	131268
C2	12	47009.4	174218
C3	12	37482.7	131944
C4	12	37317.3	125588
C5	12	37990.8	127209
C6	12	42324.6	125275
C7	12	33566.5	128054
C8	12	38172.3	131695
C9	12	49410.9	130133
C10	12	48406.9	134865
C11	12	45507.6	132300
C12	12	57997.7	139564
D1	12	42742.8	134439
D2	12	34942.1	131816
D3	12	46453.7	133863
D4	12	37362.7	123766
D5	12	40490.9	126502
D6	12	44199.7	120979
D7	12	28864.2	115161
D8	12	30755.4	128463
D9	12	37315.3	122989
D10	12	57440.5	128777
D11	12	63547.1	131163
D12	12	158096	143813
E1	12	59059	131542
E2	12	42689.5	126137
E3	12	70070.1	136882
E4	12	39793.2	134549
E5	12	33646.9	126959
E6	12	169457	141923
E7	12	47245.2	122590
E8	12	36683.1	126951
E9	12	39782.7	130765
E10	12	50416.3	127773
E11	12	48632.3	126219
E12	12	64610.4	134001
F1	12	47360	141952
F2	12	45059	135148
F3	12	34028.3	136699
F4	12	38318	133572
F5	12	35487.7	134072
F6	12	62189.6	140577
F7	12	31224.7	133211
F8	12	33300.7	126996
F9	12	36392.8	129656
F10	12	43364	129649
F11	12	42325.5	131801
F12	12	66924.1	143035
G1	12	38812.8	139961
G2	12	48835.9	144246
G3	12	36878.7	137313
G4	12	30893.9	133818
G5	12	28669.6	133138
G6	12	30227.7	132679
G7	12	27737.6	125538
G8	12	33093.7	133594
G9	12	37831.9	129310
G10	12	50878	128238
G11	12	66809.8	134106
G12	12	41368.4	148552
H1	12	54324.2	155285
H2	12	39361.8	155288
H3	12	35340.6	145672
H4	12	33830.6	143942
H5	12	33417.8	141152
H6	12	40357.7	129118
H7	12
H8	12
H9	12
H10	12
H11	12
H12	12
A1	13	19617	100355
A2	13	34853.4	126831
A3	13	31754	127340
A4	13	38912.2	119387
A5	13	39874.5	125135
A6	13	46752.1	131830
A7	13	46244.4	129305
A8	13	208603	386618
A9	13	44975.6	132968
A10	13	43592.6	131887
A11	13	43295.2	136148
A12	13	52901.9	137164
B1	13	36411.6	131368
B2	13	44391	136559
B3	13	33343.9	132314
B4	13	36736.2	127190
B5	13	39377.6	147712
B6	13	32080.8	126312
B7	13	31944.8	132038
B8	13	119530	426125
B9	13	42390.9	139642
B10	13	55630.2	140918
B11	13	59151.7	143994
B12	13	98123.7	153597
C1	13	39901.5	131512
C2	13	46953.6	174530
C3	13	37470.2	131651
C4	13	36916.6	125834
C5	13	37764	126915
C6	13	42521.3	125521
C7	13	33447.5	128162
C8	13	38079.8	131590
C9	13	49428.4	130357
C10	13	48506.8	134733
C11	13	45638.5	132820
C12	13	58099.1	139363
D1	13	43175.5	133977
D2	13	35426.7	131845
D3	13	46756.7	134310
D4	13	37621.9	124091
D5	13	40429.8	126516
D6	13	44024.1	120999
D7	13	28841.4	115121
D8	13	30467.7	128251
D9	13	37198.7	123062
D10	13	57596.8	129165
D11	13	63961.9	131116
D12	13	158860	143547
E1	13	58948	131193
E2	13	42560.1	125927
E3	13	70509.6	136717
E4	13	39886.9	134333
E5	13	33662.7	126816
E6	13	169058	141863
E7	13	47019.1	122377
E8	13	36471.5	126980
E9	13	39985.4	130675
E10	13	50522.1	127785
E11	13	49034.2	126519
E12	13	64979.8	134328
F1	13	47439.2	141892
F2	13	44971.3	135284
F3	13	34124	137158
F4	13	38101.5	133806
F5	13	35360.4	134169
F6	13	62321.4	140447
F7	13	31311.5	133362
F8	13	33288.3	127444
F9	13	36187.4	129629
F10	13	43221.3	129565
F11	13	42174.8	131923
F12	13	67049.5	143031
G1	13	39005.4	140182
G2	13	48813.1	144345
G3	13	37084.1	137324
G4	13	30730.7	133671
G5	13	28601.7	133545
G6	13	30325.5	132621
G7	13	27769.3	125422
G8	13	33289.8	133088
G9	13	37810.9	129368
G10	13	50885	128719
G11	13	67070	134158
G12	13	41347.8	148551
H1	13	54190.4	154647
H2	13	39230.9	155141
H3	13	35124.7	145384
H4	13	34011.9	144185
H5	13	33368.2	141146
H6	13	40195.2	129184
H7	13
H8	13
H9	13
H10	13
H11	13
H12	13
A1	14	19666.6	100669
A2	14	35433.8	126453
A3	14	32113.2	127456
A4	14	39114.9	119421
A5	14	39921.6	124892
A6	14	46638.7	132086
A7	14	46308.3	129167
A8	14	208174	386595
A9	14	45200.4	133157
A10	14	43389	132048
A11	14	43057.5	135929
A12	14	53010.7	136787
B1	14	36221.1	131425
B2	14	43978.3	136724
B3	14	33644.3	132413
B4	14	36377	127492
B5	14	39429.5	147516
B6	14	32155.1	126247
B7	14	32113	132299
B8	14	119422	425420
B9	14	42109.8	139513
B10	14	55336.1	140980
B11	14	59710.7	143620
B12	14	98847.4	153853
C1	14	40030.1	131738
C2	14	47209.6	174564
C3	14	37431.5	132063
C4	14	37118.1	125845
C5	14	37919.9	126848
C6	14	42465.1	125728
C7	14	33391.8	127790
C8	14	37945.6	131164
C9	14	49648.5	129947
C10	14	48030.2	134412
C11	14	45324.7	132313
C12	14	58329.7	139876
D1	14	43512.8	134484
D2	14	35505.7	131633
D3	14	46442.2	134183
D4	14	37543.3	123707
D5	14	40625.3	126848
D6	14	44027	120851
D7	14	28636.6	114847
D8	14	30839.6	128448
D9	14	37205.2	122676
D10	14	57471.4	128655
D11	14	63798	131379
D12	14	158546	143715
E1	14	59535.1	131583
E2	14	42775.6	126294
E3	14	70446	136522
E4	14	39924	134312
E5	14	33800.9	126720
E6	14	168996	141793
E7	14	47109.2	122907
E8	14	36338.2	126873
E9	14	39868.3	130530
E10	14	50660.6	127781
E11	14	48816.6	126230
E12	14	65067.5	134150
F1	14	47509.1	142023
F2	14	45192.9	135247
F3	14	34364.5	137071
F4	14	38016.5	133938
F5	14	35502.2	133950
F6	14	62089	140336
F7	14	31208.6	133057
F8	14	33349.6	127058
F9	14	36410	129818
F10	14	43536.9	129484
F11	14	42006.6	131522
F12	14	67185.4	142670
G1	14	38748.9	140092
G2	14	48905.4	144628
G3	14	36883.5	137025
G4	14	30720.4	133318
G5	14	28641.5	133220
G6	14	30120.2	132656
G7	14	27878.3	125167
G8	14	33192	133213
G9	14	37517.3	129118
G10	14	51007.4	128373
G11	14	67212.1	134026
G12	14	41602.2	148626
H1	14	54810.2	154810
H2	14	38798.8	155335
H3	14	35160.5	145705
H4	14	33759.9	143822
H5	14	33407.7	141136
H6	14	40048.3	129117
H7	14
H8	14
H9	14
H10	14
H11	14
H12	14
A1	15	19770.1	100516
A2	15	35527.1	126779
A3	15	32525.3	127865
A4	15	39379	119692
A5	15	39658.8	125266
A6	15	46331.7	132282
A7	15	46328.4	129175
A8	15	209995	386892
A9	15	45748.7	133196
A10	15	43334.5	131879
A11	15	43498.3	136222
A12	15	53074.6	137048
B1	15	36715.9	131506
B2	15	44479.6	136960
B3	15	33284.7	132461
B4	15	36525	127629
B5	15	39223.5	147327
B6	15	31871.3	125949
B7	15	31997.4	132064
B8	15	118858	427114
B9	15	42218.2	139376
B10	15	55678.9	141013
B11	15	59604.3	143598
B12	15	99036.7	153516
C1	15	40200.1	131644
C2	15	47063.2	174848
C3	15	37249.5	131876
C4	15	37433.5	125704
C5	15	38123.8	126940
C6	15	42541.9	125965
C7	15	33263	128076
C8	15	38219	131761
C9	15	49193.5	130078
C10	15	48331.4	134982
C11	15	45676.8	132553
C12	15	58383.9	139866
D1	15	43197	134176
D2	15	35375.2	132196
D3	15	46215.7	133920
D4	15	37417.7	124054
D5	15	40370.9	126457
D6	15	44166.8	120919
D7	15	28806.5	114761
D8	15	30356.8	128751
D9	15	37052.9	122766
D10	15	57888.6	128755
D11	15	64169.7	131271
D12	15	159521	143833
E1	15	59274.1	131595
E2	15	42968.8	126164
E3	15	70734	136680
E4	15	39818	134364
E5	15	33654.8	126823
E6	15	169045	141628
E7	15	46912.8	122389
E8	15	36570.8	126896
E9	15	40061.8	130740
E10	15	50244.2	127958
E11	15	48972.2	126045
E12	15	65057.8	133792
F1	15	48018.3	142263
F2	15	45234.3	135200
F3	15	34441.7	137186
F4	15	38020.1	134124
F5	15	35357	134157
F6	15	62047.8	140742
F7	15	31139.2	133274
F8	15	33095.8	127212
F9	15	36124.6	129800
F10	15	43028.6	129631
F11	15	42367.2	131756
F12	15	67480.5	143046
G1	15	39378.9	139911
G2	15	49225.8	144808
G3	15	37093.2	137251
G4	15	30806.8	133830
G5	15	28674.5	133215
G6	15	29928	132953
G7	15	27757.1	125445
G8	15	33299.3	133152
G9	15	37737.7	129398
G10	15	50843.9	128745
G11	15	67619.4	134386
G12	15	41936	149118
H1	15	54453.6	154725
H2	15	39313.4	155194
H3	15	35548.1	145509
H4	15	33996.8	143764
H5	15	33481.8	141341
H6	15	40266.4	129341
H7	15
H8	15
H9	15
H10	15
H11	15
H12	15
A1	16	19488.1	100157
A2	16	35279.2	126951
A3	16	31918.1	128034
A4	16	39567.9	119453
A5	16	39452.3	124958
A6	16	46672.8	132282
A7	16	46391.3	129341
A8	16	208462	386933
A9	16	45499.8	133408
A10	16	43402.5	132005
A11	16	43723.4	135818
A12	16	52873.5	136942
B1	16	36605.2	131410
B2	16	43739.5	136668
B3	16	33623.9	132310
B4	16	37075.3	127430
B5	16	39724.5	147730
B6	16	31857.4	126195
B7	16	31989.9	132274
B8	16	119427	426837
B9	16	42129	139464
B10	16	55895.5	140857
B11	16	60230.3	144494
B12	16	99204.2	153274
C1	16	39936.5	131583
C2	16	46611.5	174502
C3	16	37610.3	131837
C4	16	36983.4	125876
C5	16	37809.1	127087
C6	16	42333.9	126734
C7	16	33079.2	128104
C8	16	37912.1	131515
C9	16	49319.4	130128
C10	16	48568.4	134999
C11	16	45326.4	132315
C12	16	58053	139860
D1	16	43338.6	134334
D2	16	35161.3	131707
D3	16	46177	134145
D4	16	37422	123819
D5	16	40562.2	126383
D6	16	44034.6	120908
D7	16	28524	115086
D8	16	30859.5	128353
D9	16	36976.7	122711
D10	16	57519.4	128918
D11	16	64277.3	131450
D12	16	159844	144054
E1	16	59830	131742
E2	16	43106.2	126000
E3	16	70447.5	136743
E4	16	39788.1	134484
E5	16	33344.3	126613
E6	16	169202	142250
E7	16	46834.8	122479
E8	16	36044.1	126970
E9	16	39939.5	130439
E10	16	50415.7	127733
E11	16	49021.7	126110
E12	16	65559.9	134369
F1	16	46953.5	142256
F2	16	45140.2	135283
F3	16	34184	137131
F4	16	38057.9	134182
F5	16	35351.6	134428
F6	16	62163.2	140652
F7	16	30922.6	133512
F8	16	33404.6	127214
F9	16	36265.9	129657
F10	16	43358.7	130017
F11	16	42258.5	131761
F12	16	67536.1	142874
G1	16	38949.5	139913
G2	16	49218.9	144391
G3	16	36927	137458
G4	16	30654.5	133755
G5	16	28621.1	133388
G6	16	30228.7	132717
G7	16	27997.2	125169
G8	16	33207.6	133166
G9	16	37928.9	129325
G10	16	50856.7	128507
G11	16	67416.7	134181
G12	16	41676.3	148790
H1	16	54475.3	154712
H2	16	39433.4	155307
H3	16	35074.8	145570
H4	16	34009.7	143772
H5	16	33685	141341
H6	16	40432.6	129010
H7	16
H8	16
H9	16
H10	16
H11	16
H12	16
A1	17	19446.6	100486
A2	17	35266.1	126941
A3	17	32508.2	127980
A4	17	39156.8	119814
A5	17	39609.1	124929
A6	17	46430.7	132907
A7	17	46056.1	129430
A8	17	208653	386120
A9	17	45693.3	133046
A10	17	43376.8	132161
A11	17	43245.8	135980
A12	17	52791.5	136711
B1	17	36358.6	131125
B2	17	44259.6	136943
B3	17	33164.5	132292
B4	17	36920	127484
B5	17	39384.2	147548
B6	17	31946.6	126261
B7	17	31695.6	132345
B8	17	120229	424923
B9	17	41723.4	139456
B10	17	55843.9	141115
B11	17	60029	143734
B12	17	99730.7	154113
C1	17	40250	131662
C2	17	47339.6	174656
C3	17	37491.9	131994
C4	17	37050.4	125863
C5	17	38065.8	127132
C6	17	42702.2	127128
C7	17	33361.6	127940
C8	17	38004.7	131527
C9	17	49260.6	130014
C10	17	48683.7	134960
C11	17	45561.9	132566
C12	17	58287.7	139914
D1	17	43413.7	134267
D2	17	35604.7	132240
D3	17	46599	134161
D4	17	37505.5	124052
D5	17	40597.5	126506
D6	17	44143.1	121101
D7	17	28858.6	115074
D8	17	30651.2	128458
D9	17	36854.4	122773
D10	17	57773.2	128853
D11	17	64481.1	131539
D12	17	160017	143736
E1	17	59599.9	131726
E2	17	42806.8	126335
E3	17	70071.1	136509
E4	17	39796.5	134620
E5	17	33402.3	126654
E6	17	168904	141775
E7	17	46825.5	122746
E8	17	36354.1	127254
E9	17	39745.1	130510
E10	17	50388.8	127934
E11	17	48872.2	126573
E12	17	65419.6	134309
F1	17	47916.5	141953
F2	17	45061.9	135572
F3	17	34417	136882
F4	17	38553.2	133881
F5	17	35265.5	134366
F6	17	62132.9	140700
F7	17	31089.2	133027
F8	17	33127.4	127285
F9	17	36248.5	129598
F10	17	43433.1	129689
F11	17	42444.9	131954
F12	17	67308.4	143184
G1	17	38741.1	139789
G2	17	49019.8	144367
G3	17	37078.3	137576
G4	17	30607.5	133888
G5	17	28692.3	133123
G6	17	30476.9	132462
G7	17	28317.5	125033
G8	17	33605.2	132982
G9	17	38140.6	129312
G10	17	51396.1	128436
G11	17	68090.8	134204
G12	17	42340.3	148572
H1	17	54414.3	154806
H2	17	39148.9	154920
H3	17	35082.1	145401
H4	17	34213.1	143758
H5	17	33614.3	141226
H6	17	40531.3	129260
H7	17
H8	17
H9	17
H10	17
H11	17
H12	17
A1	18	19573.4	99903.4
A2	18	35255.4	126790
A3	18	32292.2	127598
A4	18	39121.5	119315
A5	18	39995.2	124529
A6	18	46618.7	132817
A7	18	46419.2	129450
A8	18	209484	385424
A9	18	45254.3	133315
A10	18	43380.7	132049
A11	18	43368.5	135971
A12	18	53034.8	136039
B1	18	36281.4	131122
B2	18	44615.8	136613
B3	18	33628.4	132446
B4	18	36920	127643
B5	18	39761.7	147146
B6	18	32476.2	126368
B7	18	31758.9	131913
B8	18	118555	426223
B9	18	41798	139762
B10	18	57066.3	140698
B11	18	60978.1	144056
B12	18	101062	153600
C1	18	40026.7	131648
C2	18	47156.2	174284
C3	18	37663.1	132124
C4	18	37002.5	125591
C5	18	37948.9	126803
C6	18	42878.5	127464
C7	18	33237.2	128017
C8	18	37607.4	131515
C9	18	49346.6	130120
C10	18	48478.7	135091
C11	18	45151.9	132262
C12	18	58138.1	139891
D1	18	43347.8	134850
D2	18	35377.1	131835
D3	18	46528.9	133883
D4	18	37812.5	123880
D5	18	40765	126440
D6	18	44257	120969
D7	18	28552.2	114923
D8	18	30661.3	128316
D9	18	36929.7	122587
D10	18	58049.5	128991
D11	18	65285.5	131457
D12	18	160443	143972
E1	18	60230.6	132207
E2	18	43028.8	126210
E3	18	70488.7	136707
E4	18	39392	134155
E5	18	33769	126766
E6	18	168774	141894
E7	18	46745.5	122372
E8	18	36403.4	126910
E9	18	39697.8	130520
E10	18	50417.8	128020
E11	18	49024.4	126451
E12	18	65731.6	134173
F1	18	47770.8	142230
F2	18	45354.5	135351
F3	18	34419.9	137128
F4	18	38556.4	134035
F5	18	35482.6	134404
F6	18	62370.3	140537
F7	18	30958.9	133363
F8	18	33026.2	127102
F9	18	36177.1	129746
F10	18	43529.1	129840
F11	18	42690	131373
F12	18	67792.4	143102
G1	18	38952	139778
G2	18	49297.3	144353
G3	18	37254.1	137512
G4	18	31038.7	133624
G5	18	29175.4	133471
G6	18	30541.9	132543
G7	18	28552	125316
G8	18	33922.8	133223
G9	18	38630.5	129052
G10	18	51947.2	128989
G11	18	68062.3	134214
G12	18	42960.1	148613
H1	18	54581.3	154778
H2	18	39847.5	155401
H3	18	35456.7	145619
H4	18	34374.8	143871
H5	18	33576	141086
H6	18	40631	129174
H7	18
H8	18
H9	18
H10	18
H11	18
H12	18
A1	19	19958.5	100192
A2	19	35299.9	126532
A3	19	33002.4	127616
A4	19	39179.3	119450
A5	19	39752.9	125021
A6	19	46741.2	133099
A7	19	46016.8	129148
A8	19	208603	386581
A9	19	45391.8	133125
A10	19	43749.4	131667
A11	19	43497.3	135879
A12	19	53208.4	136297
B1	19	35868.1	131285
B2	19	44647	137068
B3	19	33624.6	132415
B4	19	37962.3	127789
B5	19	40130.7	147618
B6	19	33153	126475
B7	19	31749.3	132384
B8	19	118544	425283
B9	19	42051.7	139582
B10	19	58508.3	140590
B11	19	62431.3	143825
B12	19	102784	153941
C1	19	40112.2	131672
C2	19	47930.7	174755
C3	19	37548.6	132158
C4	19	37138.3	125832
C5	19	37999	127039
C6	19	42952.8	127950
C7	19	33124.3	128124
C8	19	37679.3	131254
C9	19	49381.8	130074
C10	19	48981.3	134667
C11	19	46147.9	132601
C12	19	58724.1	139605
D1	19	43256.4	134184
D2	19	35389	132411
D3	19	46742.6	134146
D4	19	38233.7	123781
D5	19	41072.9	126287
D6	19	44748.8	120908
D7	19	28605	115036
D8	19	30680.3	128504
D9	19	36807.6	123113
D10	19	58838.1	129015
D11	19	65446.4	131324
D12	19	160953	144096
E1	19	60367.2	132038
E2	19	42895.4	126633
E3	19	70309.6	136886
E4	19	40063.5	134694
E5	19	33528.6	126516
E6	19	168447	141717
E7	19	46614.7	122378
E8	19	36131	126938
E9	19	39535.6	130222
E10	19	50639.9	127814
E11	19	49122.8	126483
E12	19	65795.5	134107
F1	19	47369.4	141936
F2	19	45317.9	135708
F3	19	34404.2	137288
F4	19	38675.6	134448
F5	19	35832.6	134181
F6	19	62783.3	140693
F7	19	31089.3	133586
F8	19	33173.1	127353
F9	19	35891.1	129706
F10	19	44142.4	129712
F11	19	42900.3	131981
F12	19	68127.6	142958
G1	19	39237.4	139728
G2	19	49046.9	144750
G3	19	37536.2	137464
G4	19	31280.2	133803
G5	19	29364.8	133591
G6	19	30845.9	132265
G7	19	29408.4	125627
G8	19	35113	133107
G9	19	39427.4	129346
G10	19	52645	128715
G11	19	68960.1	134253
G12	19	44131.8	148263
H1	19	55655.4	154791
H2	19	40060.6	155373
H3	19	36052.2	145543
H4	19	34388.6	144116
H5	19	33910.9	141230
H6	19	41043.8	129207
H7	19
H8	19
H9	19
H10	19
H11	19
H12	19
A1	20	19799.4	100023
A2	20	35863.1	126957
A3	20	32990.4	127668
A4	20	39431.1	119391
A5	20	40262	125121
A6	20	46979.3	133299
A7	20	46083.6	129449
A8	20	208204	387063
A9	20	45313.9	133236
A10	20	44217.7	132119
A11	20	43973	135796
A12	20	53681.8	136464
B1	20	36420.1	131070
B2	20	44342.9	136721
B3	20	33473	132672
B4	20	38532.4	127638
B5	20	41465.3	148037
B6	20	33933.1	126548
B7	20	31785.4	132369
B8	20	118409	425590
B9	20	41782.7	139293
B10	20	61195	141158
B11	20	65841.4	143973
B12	20	105932	153759
C1	20	39788.5	131666
C2	20	47541.3	175086
C3	20	37555.3	132123
C4	20	37571.3	125439
C5	20	38161.6	127117
C6	20	43108.7	127677
C7	20	33266.6	127567
C8	20	37871.1	131304
C9	20	49261.4	129923
C10	20	49362.3	134978
C11	20	46640	132414
C12	20	59037.9	139782
D1	20	43619.2	134852
D2	20	35368.2	131633
D3	20	46747.2	134191
D4	20	38633.5	123687
D5	20	41815.3	126321
D6	20	45466.2	121041
D7	20	28380.6	115122
D8	20	30410.2	128385
D9	20	37011.3	122770
D10	20	59864.5	129221
D11	20	66914.5	131163
D12	20	163052	144167
E1	20	60330	131822
E2	20	42503	126681
E3	20	70051.7	136654
E4	20	39817.4	134397
E5	20	33512.5	126713
E6	20	168788	141771
E7	20	46604.4	122537
E8	20	35937.9	126642
E9	20	39767.3	130681
E10	20	50781.6	127845
E11	20	49234.8	126451
E12	20	65974.9	134143
F1	20	47454.2	142159
F2	20	45317	135233
F3	20	34494.1	137408
F4	20	39512.7	133766
F5	20	36599.9	134041
F6	20	63562.4	140650
F7	20	30968.2	133466
F8	20	33034	127084
F9	20	36138.7	129625
F10	20	44959.2	129632
F11	20	43867.8	131689
F12	20	68977.3	142966
G1	20	39096.2	139920
G2	20	49377.2	144321
G3	20	37687.6	137574
G4	20	31819.2	133817
G5	20	30071.6	133238
G6	20	31463.5	132511
G7	20	31021.1	125366
G8	20	36963.4	133242
G9	20	41341.4	129231
G10	20	54385.7	128594
G11	20	70621.8	134040
G12	20	46704.6	148531
H1	20	57054.5	154636
H2	20	41341.8	155298
H3	20	37104.6	145985
H4	20	35010.2	143873
H5	20	34637.3	141370
H6	20	41570.6	129197
H7	20
H8	20
H9	20
H10	20
H11	20
H12	20
A1	21	20215.5	100327
A2	21	35859.5	127251
A3	21	33179.4	128026
A4	21	40114.8	119725
A5	21	40547.4	124949
A6	21	47393.6	133308
A7	21	46068.9	129138
A8	21	208521	385576
A9	21	44891.9	133511
A10	21	44706.6	132033
A11	21	45034.8	135848
A12	21	54476.7	136064
B1	21	36778.6	131493
B2	21	44947.6	137085
B3	21	33686.6	132463
B4	21	41150.5	127509
B5	21	43844.3	147363
B6	21	36011.3	126382
B7	21	31603.2	132382
B8	21	119023	425651
B9	21	41726.6	139362
B10	21	66806.9	140822
B11	21	71885.2	143930
B12	21	112098	154136
C1	21	40297.4	131888
C2	21	47538.8	174196
C3	21	37805.6	132061
C4	21	38013.8	125410
C5	21	38771.4	126584
C6	21	43648.9	128501
C7	21	33314.3	127876
C8	21	37640.9	131203
C9	21	49069.9	129967
C10	21	50649	134848
C11	21	47663.9	132482
C12	21	60097.5	139745
D1	21	43766	134738
D2	21	35379.5	132131
D3	21	46971.3	134191
D4	21	40080.9	123858
D5	21	43705.8	126460
D6	21	47155.6	121041
D7	21	28735.8	114663
D8	21	30356.3	128384
D9	21	36829.6	122857
D10	21	62829.2	129124
D11	21	69381.1	131105
D12	21	165353	144136
E1	21	60634.8	132178
E2	21	42828.5	126453
E3	21	70543.2	136780
E4	21	40260.7	134403
E5	21	33831	126662
E6	21	168800	141730
E7	21	46673.8	122211
E8	21	36122.2	126982
E9	21	39586.1	130694
E10	21	51424.4	127844
E11	21	49775.1	126293
E12	21	67079.4	134238
F1	21	47138.9	141868
F2	21	45381.7	135629
F3	21	34369.1	137047
F4	21	40996.4	133848
F5	21	38344.9	134270
F6	21	65203.4	140517
F7	21	30799.6	133128
F8	21	33129	127110
F9	21	36377.7	129571
F10	21	47070.2	129824
F11	21	45706.5	131946
F12	21	70600.9	143000
G1	21	39432.7	140136
[truncated: 10,487 more rows]

## Sheet: Amplification Data
Block Type	96alum
Chemistry	SYBR_GREEN
Experiment File Name	D:\ShuJu\LZM\spx6-10zuzhichayibiaoda.eds
Experiment Run End Time	2023-07-14 07:20:09 AM CST
Instrument Type	sds7500
Passive Reference	ROX
Well	Cycle	Target Name	Rn	ΔRn
A1	1	spx6	0.194052	-0.000155873
A1	2	spx6	0.194346	-0.000115574
A1	3	spx6	0.196162	0.00144612
A1	4	spx6	0.196412	0.00144253
A1	5	spx6	0.197655	0.00243219
A1	6	spx6	0.19507	-0.000406896
A1	7	spx6	0.193059	-0.00267239
A1	8	spx6	0.195891	-9.41381e-05
A1	9	spx6	0.199216	0.00297698
A1	10	spx6	0.197257	0.000764733
A1	11	spx6	0.197491	0.00074498
A1	12	spx6	0.196121	-0.000878912
A1	13	spx6	0.195476	-0.00177761
A1	14	spx6	0.195359	-0.00214945
A1	15	spx6	0.196687	-0.00107525
A1	16	spx6	0.194575	-0.00344032
A1	17	spx6	0.193526	-0.00474365
A1	18	spx6	0.195923	-0.00260021
A1	19	spx6	0.199203	0.000425758
A1	20	spx6	0.197949	-0.00108262
A1	21	spx6	0.201497	0.00221162
A1	22	spx6	0.208015	0.00847653
A1	23	spx6	0.217216	0.0174231
A1	24	spx6	0.242306	0.0422597
A1	25	spx6	0.281297	0.0809963
A1	26	spx6	0.366217	0.165663
A1	27	spx6	0.495074	0.294266
A1	28	spx6	0.693578	0.492516
A1	29	spx6	0.880382	0.679066
A1	30	spx6	1.00228	0.800707
A1	31	spx6	1.10973	0.907908
A1	32	spx6	1.22797	1.02589
A1	33	spx6	1.33008	1.12775
A1	34	spx6	1.41531	1.21273
A1	35	spx6	1.47626	1.27342
A1	36	spx6	1.53663	1.33354
A1	37	spx6	1.58094	1.37759
A1	38	spx6	1.63176	1.42816
A1	39	spx6	1.66477	1.46091
A1	40	spx6	1.69436	1.49025
A2	1	spx6	0.272786	-0.00163952
A2	2	spx6	0.275271	0.000531304
A2	3	spx6	0.272348	-0.00270634
A2	4	spx6	0.276422	0.00105307
A2	5	spx6	0.275571	-0.000112145
A2	6	spx6	0.276346	0.000349219
A2	7	spx6	0.274845	-0.0014667
A2	8	spx6	0.282514	0.00588874
A2	9	spx6	0.275902	-0.00103818
A2	10	spx6	0.277518	0.000263873
A2	11	spx6	0.278143	0.000574229
A2	12	spx6	0.277883	4.39192e-07
A2	13	spx6	0.274803	-0.00339444
A2	14	spx6	0.280213	0.00170107
A2	15	spx6	0.28023	0.00140384
A2	16	spx6	0.277896	-0.00124404
A2	17	spx6	0.277815	-0.0016394
A2	18	spx6	0.278062	-0.00170706
A2	19	spx6	0.278981	-0.0011019
A2	20	spx6	0.282482	0.00208513
A2	21	spx6	0.281802	0.00109059
A2	22	spx6	0.289521	0.0084956
A2	23	spx6	0.3125	0.0311594
A2	24	spx6	0.341956	0.0603017
A2	25	spx6	0.400931	0.118962
A2	26	spx6	0.516439	0.234156
A2	27	spx6	0.70287	0.420273
A2	28	spx6	0.970597	0.687686
A2	29	spx6	1.21387	0.93064
A2	30	spx6	1.38558	1.10204
A2	31	spx6	1.52491	1.24106
A2	32	spx6	1.68726	1.40309
A2	33	spx6	1.82361	1.53913
A2	34	spx6	1.92016	1.63537
A2	35	spx6	2.02695	1.74184
A2	36	spx6	2.08851	1.80308
A2	37	spx6	2.1556	1.86986
A2	38	spx6	2.20929	1.92323
A2	39	spx6	2.25349	1.96712
A2	40	spx6	2.29558	2.0089
A3	1	spx6	0.244975	1.02095e-06
A3	2	spx6	0.244067	-0.00149584
A3	3	spx6	0.242417	-0.00373437
A3	4	spx6	0.247279	0.000539043
A3	5	spx6	0.246944	-0.000383508
A3	6	spx6	0.252396	0.00447975
A3	7	spx6	0.248177	-0.00032801
A3	8	spx6	0.248988	-0.000105138
A3	9	spx6	0.254175	0.00449404
A3	10	spx6	0.251029	0.000759388
A3	11	spx6	0.250515	-0.000343005
A3	12	spx6	0.249733	-0.0017134
A3	13	spx6	0.249364	-0.0026705
A3	14	spx6	0.251956	-0.000667328
A3	15	spx6	0.254372	0.00116023
A3	16	spx6	0.249293	-0.00450641
A3	17	spx6	0.25401	-0.000378588
A3	18	spx6	0.253078	-0.00189875
A3	19	spx6	0.258607	0.00304256
A3	20	spx6	0.258407	0.00225399
A3	21	spx6	0.259162	0.00241992
A3	22	spx6	0.274758	0.0174278
A3	23	spx6	0.289515	0.0315963
A3	24	spx6	0.3219	0.063393
A3	25	spx6	0.388172	0.129077
A3	26	spx6	0.515058	0.255375
A3	27	spx6	0.71317	0.452898
A3	28	spx6	0.966914	0.706054
A3	29	spx6	1.17135	0.909898
A3	30	spx6	1.32775	1.06571
A3	31	spx6	1.45414	1.19151
A3	32	spx6	1.60412	1.3409
A3	33	spx6	1.74044	1.47664
A3	34	spx6	1.83079	1.5664
A3	35	spx6	1.91398	1.649
A3	36	spx6	1.98392	1.71835
A3	37	spx6	2.04954	1.78338
A3	38	spx6	2.09976	1.83302
A3	39	spx6	2.13542	1.86809
A3	40	spx6	2.1702	1.90228
A4	1	spx7	0.322082	-0.00630469
A4	2	spx7	0.319298	-0.00908549
A4	3	spx7	0.329411	0.00103109
A4	4	spx7	0.328479	0.000102266
A4	5	spx7	0.329283	0.000909073
A4	6	spx7	0.328486	0.000115644
A4	7	spx7	0.328243	-0.000123998
A4	8	spx7	0.325443	-0.00292095
A4	9	spx7	0.332032	0.00367183
A4	10	spx7	0.326195	-0.002162
A4	11	spx7	0.32935	0.00099567
A4	12	spx7	0.326738	-0.00161236
A4	13	spx7	0.325934	-0.00241306
A4	14	spx7	0.327537	-0.000806779
A4	15	spx7	0.329002	0.000661401
A4	16	spx7	0.331244	0.00290647
A4	17	spx7	0.326812	-0.00152204
A4	18	spx7	0.327885	-0.000445938
A4	19	spx7	0.327996	-0.000331529
A4	20	spx7	0.33027	0.00194522
A4	21	spx7	0.335058	0.00673701
A4	22	spx7	0.350353	0.0220348
A4	23	spx7	0.368592	0.040277
A4	24	spx7	0.407768	0.0794569
A4	25	spx7	0.483188	0.15488
A4	26	spx7	0.619939	0.291634
A4	27	spx7	0.842422	0.514121
A4	28	spx7	1.17081	0.842509
A4	29	spx7	1.54798	1.21968
A4	30	spx7	1.87613	1.54784
A4	31	spx7	2.03707	1.70878
A4	32	spx7	2.1723	1.84401
A4	33	spx7	2.31634	1.98805
A4	34	spx7	2.40423	2.07595
A4	35	spx7	2.47826	2.14998
A4	36	spx7	2.5359	2.20763
A4	37	spx7	2.59972	2.27146
A4	38	spx7	2.62296	2.29469
A4	39	spx7	2.64309	2.31483
A4	40	spx7	2.68123	2.35297
A5	1	spx7	0.309787	-0.00690427
A5	2	spx7	0.312868	-0.00398991
A5	3	spx7	0.31401	-0.00301545
A5	4	spx7	0.316149	-0.00104398
A5	5	spx7	0.318013	0.000652838
A5	6	spx7	0.318294	0.000766195
A5	7	spx7	0.318181	0.000486131
A5	8	spx7	0.316399	-0.00146313
A5	9	spx7	0.318467	0.000438037
A5	10	spx7	0.321492	0.00329541
A5	11	spx7	0.321971	0.00360731
A5	12	spx7	0.320474	0.00194326
A5	13	spx7	0.318653	-4.51645e-05
A5	14	spx7	0.319649	0.00078318
A5	15	spx7	0.316596	-0.00243721
A5	16	spx7	0.315726	-0.00347422
A5	17	spx7	0.317052	-0.00231504
A5	18	spx7	0.321173	0.00163852
A5	19	spx7	0.31797	-0.00173151
A5	20	spx7	0.321784	0.00191482
A5	21	spx7	0.324511	0.00447424
A5	22	spx7	0.336558	0.0163541
A5	23	spx7	0.353452	0.0330808
A5	24	spx7	0.391718	0.0711797
A5	25	spx7	0.462317	0.141611
A5	26	spx7	0.588925	0.268052
A5	27	spx7	0.801022	0.479982
A5	28	spx7	1.11979	0.798585
A5	29	spx7	1.49011	1.16874
A5	30	spx7	1.81285	1.49131
A5	31	spx7	1.98457	1.66286
A5	32	spx7	2.1334	1.81153
A5	33	spx7	2.26334	1.9413
A5	34	spx7	2.36841	2.0462
A5	35	spx7	2.44461	2.12224
A5	36	spx7	2.50338	2.18084
A5	37	spx7	2.54946	2.22675
A5	38	spx7	2.58136	2.25848
A5	39	spx7	2.61764	2.2946
A5	40	spx7	2.63032	2.3071
A6	1	spx7	0.350432	-0.0104261
A6	2	spx7	0.356522	-0.00374839
A6	3	spx7	0.361586	0.00190285
A6	4	spx7	0.359297	0.000200964
A6	5	spx7	0.359841	0.00133191
A6	6	spx7	0.357809	-0.000112012
A6	7	spx7	0.356726	-0.000607859
A6	8	spx7	0.354435	-0.00231165
A6	9	spx7	0.357363	0.00120306
A6	10	spx7	0.354153	-0.00141939
A6	11	spx7	0.353952	-0.00103264
A6	12	spx7	0.354513	0.000115584
A6	13	spx7	0.354638	0.000827327
A6	14	spx7	0.353092	-0.000130963
A6	15	spx7	0.350249	-0.00238634
A6	16	spx7	0.352828	0.000779984
A6	17	spx7	0.349348	-0.00211286
A6	18	spx7	0.351	0.000125801
A6	19	spx7	0.351177	0.000890324
A6	20	spx7	0.352435	0.00273593
A6	21	spx7	0.355519	0.00640746
A6	22	spx7	0.367931	0.0194066
A6	23	spx7	0.383209	0.0352717
A6	24	spx7	0.415233	0.067883
A6	25	spx7	0.478795	0.132032
A6	26	spx7	0.585329	0.239153
A6	27	spx7	0.758157	0.412569
A6	28	spx7	0.991127	0.646126
A6	29	spx7	1.19005	0.845633
A6	30	spx7	1.33145	0.987619
A6	31	spx7	1.46566	1.12242
A6	32	spx7	1.61405	1.2714
A6	33	spx7	1.74382	1.40175
A6	34	spx7	1.84102	1.49954
A6	35	spx7	1.92034	1.57945
A6	36	spx7	1.98341	1.64311
A6	37	spx7	2.04602	1.7063
A6	38	spx7	2.08248	1.74336
A6	39	spx7	2.12481	1.78627
A6	40	spx7	2.15497	1.81701
A7	1	spx8	0.34445	-0.0137807
A7	2	spx8	0.350444	-0.00771163
A7	3	spx8	0.353088	-0.00499256
A7	4	spx8	0.358399	0.000393663
A7	5	spx8	0.354853	-0.00307736
A7	6	spx8	0.359564	0.00170897
A7	7	spx8	0.358594	0.000813673
A7	8	spx8	0.36003	0.00232497
A7	9	spx8	0.357926	0.000296289
A7	10	spx8	0.360709	0.00315394
A7	11	spx8	0.358686	0.00120587
A7	12	spx8	0.35867	0.00126556
A7	13	spx8	0.357637	0.000307642
A7	14	spx8	0.358516	0.00126179
A7	15	spx8	0.35865	0.00147069
A7	16	spx8	0.358674	0.00157025
A7	17	spx8	0.355839	-0.00119014
A7	18	spx8	0.358587	0.00163303
A7	19	spx8	0.356311	-0.000568027
A7	20	spx8	0.355997	-0.00080702
A7	21	spx8	0.356743	1.41153e-05
A7	22	spx8	0.3548	-0.00185354
A7	23	spx8	0.35282	-0.00375807
A7	24	spx8	0.353395	-0.00310782
A7	25	spx8	0.353869	-0.00255896
A7	26	spx8	0.35618	-0.000172666
A7	27	spx8	0.352796	-0.0034816
A7	28	spx8	0.35457	-0.00163308
A7	29	spx8	0.359337	0.00320916
A7	30	spx8	0.362624	0.00657124
A7	31	spx8	0.370523	0.0145459
A7	32	spx8	0.387021	0.0311189
A7	33	spx8	0.423689	0.0678618
A7	34	spx8	0.485082	0.12933
A7	35	spx8	0.606579	0.250903
A7	36	spx8	0.805233	0.449632
A7	37	spx8	1.10462	0.749097
A7	38	spx8	1.44204	1.08659
A7	39	spx8	1.71631	1.36093
A7	40	spx8	1.85308	1.49778
A8	1	spx8	0.521627	-0.0173007
A8	2	spx8	0.526057	-0.0129357
A8	3	spx8	0.535647	-0.00341038
A8	4	spx8	0.536919	-0.00220251
A8	5	spx8	0.536604	-0.00258309
A8	6	spx8	0.53569	-0.0035614
A8	7	spx8	0.541165	0.00184897
A8	8	spx8	0.544665	0.00528433
A8	9	spx8	0.541401	0.00195522
A8	10	spx8	0.543727	0.00421667
A8	11	spx8	0.540913	0.00133775
A8	12	spx8	0.539126	-0.000513879
A8	13	spx8	0.539558	-0.000146487
A8	14	spx8	0.538481	-0.00128757
A8	15	spx8	0.542776	0.00294214
A8	16	spx8	0.538753	-0.00114478
A8	17	spx8	0.540385	0.000422036
A8	18	spx8	0.543516	0.00348868
A8	19	spx8	0.539609	-0.000482845
A8	20	spx8	0.537909	-0.00224805
A8	21	spx8	0.540805	0.000582923
A8	22	spx8	0.53784	-0.00244596
A8	23	spx8	0.538521	-0.00183043
A8	24	spx8	0.542106	0.00169058
A8	25	spx8	0.540319	-0.000161048
A8	26	spx8	0.538535	-0.00201035
A8	27	spx8	0.542108	0.0014988
A8	28	spx8	0.537737	-0.00293759
A8	29	spx8	0.542437	0.00169827
A8	30	spx8	0.548559	0.00775564
A8	31	spx8	0.563268	0.0224
A8	32	spx8	0.583848	0.0429149
A8	33	spx8	0.631837	0.0908389
A8	34	spx8	0.71439	0.173328
A8	35	spx8	0.868408	0.32728
A8	36	spx8	1.11404	0.572845
A8	37	spx8	1.44333	0.902069
A8	38	spx8	1.76029	1.21897
A8	39	spx8	1.95285	1.41146
A8	40	spx8	2.07893	1.53748
A9	1	spx8	0.325259	-0.0118542
A9	2	spx8	0.330586	-0.00675085
A9	3	spx8	0.33311	-0.00445071
A9	4	spx8	0.336378	-0.00140721
A9	5	spx8	0.336057	-0.00195218
A9	6	spx8	0.339385	0.0011525
A9	7	spx8	0.339614	0.00115789
A9	8	spx8	0.340791	0.0021107
A9	9	spx8	0.341184	0.00227943
A9	10	spx8	0.341104	0.00197616
A9	11	spx8	0.340559	0.00120711
A9	12	spx8	0.3424	0.00282414
A9	13	spx8	0.338245	-0.00155495
A9	14	spx8	0.339452	-0.000571124
A9	15	spx8	0.343468	0.00322083
A9	16	spx8	0.341058	0.000587431
A9	17	spx8	0.343438	0.0027435
A9	18	spx8	0.339454	-0.00146471
A9	19	spx8	0.340972	-0.000170218
A9	20	spx8	0.340104	-0.00126263
A9	21	spx8	0.33624	-0.00535047
A9	22	spx8	0.339376	-0.00243816
A9	23	spx8	0.339253	-0.00278465
A9	24	spx8	0.34183	-0.000432116
A9	25	spx8	0.341374	-0.00111164
A9	26	spx8	0.343271	0.000561067
A9	27	spx8	0.344851	0.00191725
A9	28	spx8	0.34637	0.00321275
A9	29	spx8	0.353509	0.0101274
A9	30	spx8	0.366578	0.0229735
A9	31	spx8	0.392243	0.0484138
A9	32	spx8	0.443303	0.0992499
A9	33	spx8	0.542742	0.198465
A9	34	spx8	0.713721	0.369221
A9	35	spx8	0.976764	0.63204
A9	36	spx8	1.32474	0.979794
A9	37	spx8	1.65245	1.30728
A9	38	spx8	1.82513	1.47974
A9	39	spx8	1.97037	1.62475
A9	40	spx8	2.11744	1.77159
A10	1	spx9	0.317387	-0.00669634
A10	2	spx9	0.322048	-0.00248029
A10	3	spx9	0.325607	0.000633169
A10	4	spx9	0.326452	0.00103256
A10	5	spx9	0.324799	-0.00106519
A10	6	spx9	0.328931	0.00262088
A10	7	spx9	0.327248	0.000493062
A10	8	spx9	0.326504	-0.000696641
A10	9	spx9	0.326999	-0.000647283
A10	10	spx9	0.327019	-0.00107232
A10	11	spx9	0.331221	0.00268403
A10	12	spx9	0.327087	-0.00189509
A10	13	spx9	0.330531	0.00110333
A10	14	spx9	0.328585	-0.00128783
A10	15	spx9	0.328594	-0.0017246
A10	16	spx9	0.328794	-0.00196978
A10	17	spx9	0.328213	-0.00299626
A10	18	spx9	0.32852	-0.00313403
A10	19	spx9	0.332274	0.000173948
A10	20	spx9	0.33468	0.0021351
A10	21	spx9	0.338603	0.00561294
A10	22	spx9	0.34758	0.0141443
A10	23	spx9	0.370506	0.0366247
A10	24	spx9	0.408196	0.07387
A10	25	spx9	0.482476	0.147705
A10	26	spx9	0.618079	0.282862
A10	27	spx9	0.833584	0.497921
A10	28	spx9	1.12409	0.787981
A10	29	spx9	1.4087	1.07215
A10	30	spx9	1.63032	1.29332
A10	31	spx9	1.79266	1.45522
A10	32	spx9	1.93594	1.59805
A10	33	spx9	2.06095	1.72262
A10	34	spx9	2.14754	1.80876
A10	35	spx9	2.23398	1.89475
A10	36	spx9	2.29484	1.95517
A10	37	spx9	2.35266	2.01254
A10	38	spx9	2.39399	2.05343
A10	39	spx9	2.43571	2.0947
A10	40	spx9	2.47546	2.13401
A11	1	spx9	0.318085	-0.00212578
A11	2	spx9	0.315898	-0.00430311
A11	3	spx9	0.31878	-0.00141191
A11	4	spx9	0.323334	0.00315058
A11	5	spx9	0.318309	-0.0018648
A11	6	spx9	0.320289	0.000124672
A11	7	spx9	0.323429	0.0032734
A11	8	spx9	0.318556	-0.00159029
A11	9	spx9	0.318364	-0.00177269
A11	10	spx9	0.322173	0.0020456
A11	11	spx9	0.321508	0.00138982
A11	12	spx9	0.320381	0.000271751
A11	13	spx9	0.318	-0.00210017
A11	14	spx9	0.316763	-0.0033277
A11	15	spx9	0.319319	-0.000763162
A11	16	spx9	0.321927	0.00185425
A11	17	spx9	0.318031	-0.00203249
A11	18	spx9	0.318955	-0.00109903
A11	19	spx9	0.320117	7.20122e-05
A11	20	spx9	0.323816	0.00378016
A11	21	spx9	0.331508	0.0114815
A11	22	spx9	0.343861	0.0238434
A11	23	spx9	0.364548	0.0445399
A11	24	spx9	0.413631	0.0936319
A11	25	spx9	0.494202	0.174212
A11	26	spx9	0.647398	0.327417
A11	27	spx9	0.887502	0.567531
A11	28	spx9	1.20338	0.883416
A11	29	spx9	1.49734	1.17738
A11	30	spx9	1.72839	1.40845
A11	31	spx9	1.88687	1.56693
A11	32	spx9	2.0456	1.72568
A11	33	spx9	2.16845	1.84854
A11	34	spx9	2.26957	1.94966
A11	35	spx9	2.34709	2.02719
A11	36	spx9	2.41818	2.09829
A11	37	spx9	2.47854	2.15866
A11	38	spx9	2.52724	2.20737
A11	39	spx9	2.56402	2.24416
A11	40	spx9	2.59985	2.28
A12	1	spx9	0.3825	0.00160629
A12	2	spx9	0.383016	0.00154368
A12	3	spx9	0.386111	0.00405933
A12	4	spx9	0.380315	-0.00231618
A12	5	spx9	0.381776	-0.00143417
A12	6	spx9	0.384703	0.000914592
A12	7	spx9	0.386728	0.00235989
A12	8	spx9	0.385379	0.000432379
A12	9	spx9	0.385685	0.00015916
A12	10	spx9	0.386928	0.000823136
A12	11	spx9	0.385648	-0.00103628
A12	12	spx9	0.387989	0.000725522
A12	13	spx9	0.385683	-0.00215948
A12	14	spx9	0.387542	-0.000878808
A12	15	spx9	0.38727	-0.00173043
A12	16	spx9	0.386103	-0.00347654
A12	17	spx9	0.386154	-0.0040043
A12	18	spx9	0.389849	-0.000888874
A12	19	spx9	0.390386	-0.000930886
A12	20	spx9	0.393378	0.00148246
A12	21	spx9	0.400374	0.00789947
A12	22	spx9	0.408592	0.0155385
A12	23	spx9	0.432731	0.0390986
A12	24	spx9	0.47215	0.0779379
A12	25	spx9	0.554716	0.159925
A12	26	spx9	0.695455	0.300085
A12	27	spx9	0.92006	0.524111
A12	28	spx9	1.21089	0.814365
A12	29	spx9	1.50832	1.11122
A12	30	spx9	1.74461	1.34692
A12	31	spx9	1.89925	1.50098
A12	32	spx9	2.05243	1.65359
A12	33	spx9	2.19214	1.79272
A12	34	spx9	2.29019	1.89019
A12	35	spx9	2.36731	1.96672
A12	36	spx9	2.4414	2.04024
A12	37	spx9	2.49772	2.09598
A12	38	spx9	2.54327	2.14095
A12	39	spx9	2.58848	2.18558
A12	40	spx9	2.63575	2.23227
B1	1	spx6	0.275987	0.00121804
B1	2	spx6	0.277785	0.00277045
B1	3	spx6	0.272177	-0.00308153
B1	4	spx6	0.27326	-0.00224423
B1	5	spx6	0.276824	0.0010748
B1	6	spx6	0.279695	0.00370132
B1	7	spx6	0.279308	0.00306915
B1	8	spx6	0.2808	0.00431645
B1	9	spx6	0.274939	-0.0017896
B1	10	spx6	0.278945	0.00197128
B1	11	spx6	0.274474	-0.00274433
B1	12	spx6	0.278355	0.000891856
B1	13	spx6	0.277172	-0.000536415
B1	14	spx6	0.275603	-0.00235048
B1	15	spx6	0.279197	0.000998237
B1	16	spx6	0.278558	0.000114485
B1	17	spx6	0.277283	-0.00140567
B1	18	spx6	0.276699	-0.00223366
B1	19	spx6	0.273207	-0.00597077
B1	20	spx6	0.277867	-0.0015555
B1	21	spx6	0.279699	3.14844e-05
B1	22	spx6	0.28178	0.00186713
B1	23	spx6	0.280685	0.000527049
B1	24	spx6	0.285752	0.00534892
B1	25	spx6	0.295232	0.0145844
B1	26	spx6	0.31947	0.0385777
B1	27	spx6	0.360408	0.0792703
B1	28	spx6	0.441926	0.160543
B1	29	spx6	0.585139	0.303511
B1	30	spx6	0.807482	0.52561
B1	31	spx6	1.06418	0.782058
B1	32	spx6	1.27375	0.991387
B1	33	spx6	1.41752	1.13492
B1	34	spx6	1.56121	1.27836
B1	35	spx6	1.70271	1.41962
B1	36	spx6	1.81796	1.53462
B1	37	spx6	1.92147	1.63789
B1	38	spx6	1.99855	1.71472
B1	39	spx6	2.06334	1.77927
B1	40	spx6	2.11498	1.83066
B2	1	spx6	0.313114	-0.00697998
B2	2	spx6	0.316695	-0.00370518
B2	3	spx6	0.320397	-0.000309589
B2	4	spx6	0.323224	0.00221056
B2	5	spx6	0.32213	0.000810064
B2	6	spx6	0.321032	-0.00059374
B2	7	spx6	0.321673	-0.000259531
B2	8	spx6	0.320735	-0.00150437
B2	9	spx6	0.320971	-0.00157503
B2	10	spx6	0.325105	0.00225315
B2	11	spx6	0.325177	0.00201783
B2	12	spx6	0.323287	-0.000178325
B2	13	spx6	0.325068	0.00129576
B2	14	spx6	0.321656	-0.0024218
B2	15	spx6	0.324763	0.000378636
B2	16	spx6	0.320042	-0.0046494
B2	17	spx6	0.323197	-0.00180077
B2	18	spx6	0.326585	0.00128071
B2	19	spx6	0.32573	0.000119018
B2	20	spx6	0.324332	-0.00158561
B2	21	spx6	0.327881	0.00165719
B2	22	spx6	0.327182	0.000651421
B2	23	spx6	0.329041	0.00220383
B2	24	spx6	0.330866	0.00372268
B2	25	spx6	0.342308	0.0148579
B2	26	spx6	0.366458	0.0387012
B2	27	spx6	0.407216	0.0791527
B2	28	spx6	0.487781	0.159412
B2	29	spx6	0.624898	0.296223
B2	30	spx6	0.853663	0.52468
B2	31	spx6	1.12953	0.800241
B2	32	spx6	1.35769	1.02809
B2	33	spx6	1.50666	1.17676
B2	34	spx6	1.66985	1.33964
B2	35	spx6	1.81468	1.48417
B2	36	spx6	1.94634	1.61552
B2	37	spx6	2.04656	1.71543
B2	38	spx6	2.13288	1.80145
B2	39	spx6	2.20566	1.87392
B2	40	spx6	2.26547	1.93342
B3	1	spx6	0.248624	-0.00494764
B3	2	spx6	0.253925	0.000326291
B3	3	spx6	0.255078	0.00145137
B3	4	spx6	0.25534	0.00168592
B3	5	spx6	0.255095	0.00141395
B3	6	spx6	0.254425	0.000716046
B3	7	spx6	0.254023	0.000287615
B3	8	spx6	0.252066	-0.00169679
B3	9	spx6	0.253177	-0.000614188
B3	10	spx6	0.25374	-7.83346e-05
B3	11	spx6	0.253855	9.67918e-06
B3	12	spx6	0.25324	-0.000632643
B3	13	spx6	0.252005	-0.00189548
B3	14	spx6	0.254087	0.000158892
B3	15	spx6	0.25128	-0.00267503
B3	16	spx6	0.254129	0.000146331
B3	17	spx6	0.250693	-0.00331723
B3	18	spx6	0.253903	-0.000134213
B3	19	spx6	0.253933	-0.000131494
B3	20	spx6	0.252298	-0.00179425
B3	21	spx6	0.25431	0.000190595
B3	22	spx6	0.256776	0.00262903
B3	23	spx6	0.258455	0.00428023
B3	24	spx6	0.261947	0.00774563
B3	25	spx6	0.273711	0.0194818
B3	26	spx6	0.293597	0.0393398
B3	27	spx6	0.331983	0.0776993
B3	28	spx6	0.405924	0.151613
B3	29	spx6	0.544927	0.290588
B3	30	spx6	0.758484	0.504117
B3	31	spx6	1.0172	0.762803
B3	32	spx6	1.2339	0.97948
B3	33	spx6	1.38595	1.13151
B3	34	spx6	1.53165	1.27718
B3	35	spx6	1.67883	1.42433
B3	36	spx6	1.7928	1.53827
B3	37	spx6	1.89666	1.64211
B3	38	spx6	1.97361	1.71902
B3	39	spx6	2.04588	1.79127
B3	40	spx6	2.10293	1.84829
B4	1	spx7	0.29162	-0.00155437
B4	2	spx7	0.295285	0.00235142
B4	3	spx7	0.295565	0.00287157
B4	4	spx7	0.294166	0.00171269
B4	5	spx7	0.294838	0.00262582
B4	6	spx7	0.292329	0.000357009
B4	7	spx7	0.289738	-0.00199388
B4	8	spx7	0.291153	-0.000337717
B4	9	spx7	0.290778	-0.00047241
B4	10	spx7	0.28942	-0.00159076
B4	11	spx7	0.290248	-0.000521886
B4	12	spx7	0.287649	-0.00287998
B4	13	spx7	0.28883	-0.00145887
B4	14	spx7	0.285328	-0.00472052
B4	15	spx7	0.28618	-0.00362771
B4	16	spx7	0.290946	0.00137805
B4	17	spx7	0.289605	0.000277312
B4	18	spx7	0.289244	0.000157192
B4	19	spx7	0.297071	0.0082241
B4	20	spx7	0.301887	0.0132811
B4	21	spx7	0.322727	0.034361
B4	22	spx7	0.354349	0.0662234
B4	23	spx7	0.423324	0.13544
B4	24	spx7	0.539207	0.251563
B4	25	spx7	0.747039	0.459636
B4	26	spx7	1.05846	0.771296
B4	27	spx7	1.44157	1.15465
B4	28	spx7	1.80641	1.51972
B4	29	spx7	2.03239	1.74595
B4	30	spx7	2.16937	1.88317
B4	31	spx7	2.2861	2.00014
B4	32	spx7	2.40246	2.11674
B4	33	spx7	2.49163	2.20615
B4	34	spx7	2.54551	2.26027
B4	35	spx7	2.59163	2.30663
B4	36	spx7	2.62662	2.34186
B4	37	spx7	2.6521	2.36758
B4	38	spx7	2.67893	2.39466
B4	39	spx7	2.70118	2.41715
B4	40	spx7	2.70102	2.41722
B5	1	spx7	0.271292	0.00125212
B5	2	spx7	0.272861	0.00294394
B5	3	spx7	0.272481	0.00268649
B5	4	spx7	0.270056	0.000384203
B5	5	spx7	0.272696	0.00314727
B5	6	spx7	0.266444	-0.00298124
B5	7	spx7	0.269639	0.000336241
B5	8	spx7	0.269104	-7.55614e-05
B5	9	spx7	0.269406	0.000349039
B5	10	spx7	0.26702	-0.00191367
B5	11	spx7	0.267159	-0.00165131
B5	12	spx7	0.267773	-0.000914888
B5	13	spx7	0.266583	-0.00198166
B5	14	spx7	0.26729	-0.00115234
B5	15	spx7	0.266234	-0.00208482
B5	16	spx7	0.268899	0.000703345
B5	17	spx7	0.266924	-0.00114895
B5	18	spx7	0.27022	0.00226989
B5	19	spx7	0.271855	0.00402796
B5	20	spx7	0.280102	0.0123972
B5	21	spx7	0.297525	0.0299437
B5	22	spx7	0.326382	0.0589239
B5	23	spx7	0.380483	0.113148
B5	24	spx7	0.485642	0.218429
B5	25	spx7	0.659316	0.392226
B5	26	spx7	0.935714	0.668747
B5	27	spx7	1.27282	1.00597
B5	28	spx7	1.60487	1.33815
B5	29	spx7	1.82331	1.55671
B5	30	spx7	1.95095	1.68448
B5	31	spx7	2.06162	1.79527
B5	32	spx7	2.16249	1.89626
B5	33	spx7	2.24088	1.97477
B5	34	spx7	2.29213	2.02615
B5	35	spx7	2.33682	2.07096
B5	36	spx7	2.37348	2.10774
B5	37	spx7	2.39589	2.13028
B5	38	spx7	2.41752	2.15203
B5	39	spx7	2.44043	2.17507
B5	40	spx7	2.45088	2.18564
B6	1	spx7	0.256066	3.25345e-05
B6	2	spx7	0.257266	0.00128697
B6	3	spx7	0.256807	0.000882068
B6	4	spx7	0.257229	0.00135818
B6	5	spx7	0.25667	0.000853029
B6	6	spx7	0.255668	-9.44221e-05
B6	7	spx7	0.258485	0.00277676
B6	8	spx7	0.256209	0.000554274
B6	9	spx7	0.254371	-0.00122925
B6	10	spx7	0.253474	-0.0020724
B6	11	spx7	0.252626	-0.00286577
B6	12	spx7	0.255504	6.58206e-05
B6	13	spx7	0.253981	-0.00140269
B6	14	spx7	0.2547	-0.000629777
B6	15	spx7	0.253049	-0.00222644
B6	16	spx7	0.252446	-0.00277547
B6	17	spx7	0.25302	-0.00214769
B6	18	spx7	0.256997	0.00188319
B6	19	spx7	0.26213	0.00707058
B6	20	spx7	0.268143	0.0131381
B6	21	spx7	0.28494	0.0299891
B6	22	spx7	0.319674	0.0647768
B6	23	spx7	0.382068	0.127225
B6	24	spx7	0.496438	0.241649
B6	25	spx7	0.696212	0.441478
B6	26	spx7	1.00033	0.74565
B6	27	spx7	1.38693	1.1323
B6	28	spx7	1.75155	1.49698
B6	29	spx7	1.99211	1.7376
B6	30	spx7	2.14424	1.88978
B6	31	spx7	2.2697	2.01529
B6	32	spx7	2.3848	2.13044
B6	33	spx7	2.47029	2.21599
B6	34	spx7	2.53832	2.28407
B6	35	spx7	2.58852	2.33433
B6	36	spx7	2.63149	2.37735
B6	37	spx7	2.65346	2.39937
B6	38	spx7	2.6721	2.41807
B6	39	spx7	2.69725	2.44327
B6	40	spx7	2.7162	2.46228
B7	1	spx8	0.244941	0.000659644
B7	2	spx8	0.245607	0.00152189
B7	3	spx8	0.246123	0.0022335
B7	4	spx8	0.244675	0.000980238
B7	5	spx8	0.245014	0.00151481
B7	6	spx8	0.242501	-0.000801652
B7	7	spx8	0.242537	-0.000570859
B7	8	spx8	0.242178	-0.000734083
B7	9	spx8	0.242496	-0.000220273
B7	10	spx8	0.243805	0.00128444
B7	11	spx8	0.242008	-0.000317258
B7	12	spx8	0.242003	-0.000126132
B7	13	spx8	0.241936	2.6024e-06
B7	14	spx8	0.242731	0.000993175
B7	15	spx8	0.242288	0.000745119
B7	16	spx8	0.241846	0.000499253
B7	17	spx8	0.239493	-0.00165883
B7	18	spx8	0.240757	-0.000198413
B7	19	spx8	0.239828	-0.000932291
B7	20	spx8	0.240126	-0.000438255
B7	21	spx8	0.238727	-0.0016417
B7	22	spx8	0.241555	0.00138194
B7	23	spx8	0.238129	-0.00184889
B7	24	spx8	0.238707	-0.00107506
B7	25	spx8	0.238457	-0.00112961
B7	26	spx8	0.238383	-0.00100819
B7	27	spx8	0.237845	-0.0013499
B7	28	spx8	0.239519	0.000519156
B7	29	spx8	0.238691	-0.000112709
B7	30	spx8	0.237171	-0.00143773
B7	31	spx8	0.236031	-0.00238148
B7	32	spx8	0.238086	-0.000131504
B7	33	spx8	0.239017	0.00099531
B7	34	spx8	0.238041	0.000214671
B7	35	spx8	0.24013	0.00249951
B7	36	spx8	0.237185	-0.000250238
B7	37	spx8	0.239627	0.00238775
B7	38	spx8	0.23747	0.000426028
B7	39	spx8	0.238536	0.00168756
B7	40	spx8	0.238796	0.00214327
B8	1	spx8	0.28672	0.00290921
B8	2	spx8	0.285066	0.00144306
B8	3	spx8	0.286492	0.00305626
B8	4	spx8	0.283877	0.000629821
B8	5	spx8	0.285334	0.00227449
B8	6	spx8	0.283711	0.00083859
B8	7	spx8	0.284369	0.0016845
B8	8	spx8	0.282246	-0.000251127
B8	9	spx8	0.284064	0.00175517
B8	10	spx8	0.280941	-0.00118069
B8	11	spx8	0.281947	1.28688e-05
B8	12	spx8	0.280474	-0.00127247
B8	13	spx8	0.280503	-0.00105551
B8	14	spx8	0.280717	-0.000654369
B8	15	spx8	0.278281	-0.0029025
B8	16	spx8	0.279796	-0.00119948
B8	17	spx8	0.282943	0.00213454
B8	18	spx8	0.278154	-0.00246652
B8	19	spx8	0.278742	-0.00169041
B8	20	spx8	0.278222	-0.00202315
B8	21	spx8	0.279626	-0.00043158
B8	22	spx8	0.27966	-0.000210117
B8	23	spx8	0.27918	-0.000501701
B8	24	spx8	0.278224	-0.00127006
B8	25	spx8	0.276811	-0.00249601
B8	26	spx8	0.277482	-0.00163707
B8	27	spx8	0.276688	-0.00224334
B8	28	spx8	0.277516	-0.00122758
B8	29	spx8	0.277576	-0.000979508
B8	30	spx8	0.278218	-0.000150166
B8	31	spx8	0.280718	0.00253717
B8	32	spx8	0.288913	0.0109199
B8	33	spx8	0.298006	0.020201
B8	34	spx8	0.321187	0.043569
B8	35	spx8	0.36421	0.0867802
B8	36	spx8	0.442916	0.165674
B8	37	spx8	0.588569	0.311514
B8	38	spx8	0.827749	0.550882
B8	39	spx8	1.16341	0.886726
B8	40	spx8	1.52935	1.25286
B9	1	spx8	0.305919	-0.0016904
B9	2	spx8	0.308023	0.000723138
B9	3	spx8	0.308537	0.00154586
B9	4	spx8	0.309269	0.00258671
B9	5	spx8	0.308002	0.00162827
B9	6	spx8	0.308195	0.00213088
B9	7	spx8	0.30577	1.43823e-05
B9	8	spx8	0.304484	-0.000961822
B9	9	spx8	0.305601	0.000464101
B9	10	spx8	0.303314	-0.00151409
B9	11	spx8	0.30488	0.000360539
B9	12	spx8	0.30454	0.000330112
B9	13	spx8	0.303569	-0.000332423
B9	14	spx8	0.301834	-0.00175817
B9	15	spx8	0.302909	-0.000374145
B9	16	spx8	0.302079	-0.000894761
B9	17	spx8	0.299188	-0.00347695
B9	18	spx8	0.299066	-0.00329048
B9	19	spx8	0.301268	-0.000779275
B9	20	spx8	0.299963	-0.00177533
B9	21	spx8	0.299412	-0.00201711
B9	22	spx8	0.303944	0.00282439
B9	23	spx8	0.302316	0.00150517
B9	24	spx8	0.297951	-0.00255066
B9	25	spx8	0.296656	-0.00353652
B9	26	spx8	0.302021	0.0021368
B9	27	spx8	0.298087	-0.00148788
B9	28	spx8	0.299441	0.000174823
B9	29	spx8	0.303197	0.00424031
B9	30	spx8	0.303455	0.00480727
B9	31	spx8	0.306216	0.00787724
B9	32	spx8	0.32153	0.0235003
B9	33	spx8	0.344324	0.0466029
B9	34	spx8	0.389348	0.0919361
B9	35	spx8	0.473519	0.176417
B9	36	spx8	0.624092	0.327298
B9	37	spx8	0.868943	0.572459
B9	38	spx8	1.2005	0.904327
B9	39	spx8	1.54613	1.25026
B9	40	spx8	1.7585	1.46294
B10	1	spx9	0.390709	-0.00644223
B10	2	spx9	0.396217	-0.000765028
B10	3	spx9	0.39788	0.00106824
B10	4	spx9	0.397794	0.00115131
B10	5	spx9	0.394192	-0.0022811
B10	6	spx9	0.398753	0.00244878
B10	7	spx9	0.396874	0.000739865
B10	8	spx9	0.392677	-0.00328782
B10	9	spx9	0.395475	-0.000320241
B10	10	spx9	0.398174	0.00254812
B10	11	spx9	0.393534	-0.00192296
B10	12	spx9	0.394353	-0.000934821
B10	13	spx9	0.394769	-0.000348748
B10	14	spx9	0.39251	-0.00243868
B10	15	spx9	0.394848	6.90432e-05
B10	16	spx9	0.396826	0.00221572
B10	17	spx9	0.395734	0.00129328
B10	18	spx9	0.405595	0.0113243
B10	19	spx9	0.416164	0.0220625
B10	20	spx9	0.433522	0.0395899
B10	21	spx9	0.474407	0.0806441
B10	22	spx9	0.551068	0.157475
B10	23	spx9	0.67881	0.285386
B10	24	spx9	0.903245	0.509991
B10	25	spx9	1.20799	0.814901
B10	26	spx9	1.51924	1.12632
B10	27	spx9	1.74803	1.35528
B10	28	spx9	1.92462	1.53204
B10	29	spx9	2.07609	1.68368
B10	30	spx9	2.20781	1.81557
B10	31	spx9	2.30792	1.91585
B10	32	spx9	2.38907	1.99717
B10	33	spx9	2.46305	2.07132
B10	34	spx9	2.51051	2.11895
B10	35	spx9	2.56349	2.1721
B10	36	spx9	2.60161	2.21039
B10	37	spx9	2.63573	2.24468
B10	38	spx9	2.66635	2.27546
B10	39	spx9	2.68912	2.29841
B10	40	spx9	2.71025	2.3197
B11	1	spx9	0.402531	-0.00618604
B11	2	spx9	0.409777	0.000579
B11	3	spx9	0.409395	-0.000285178
B11	4	spx9	0.409859	-0.00030285
B11	5	spx9	0.41204	0.00139669
B11	6	spx9	0.410277	-0.000846979
B11	7	spx9	0.412313	0.00070766
B11	8	spx9	0.412973	0.00088564
B11	9	spx9	0.413038	0.000469422
B11	10	spx9	0.412065	-0.00098502
B11	11	spx9	0.413702	0.000170327
B11	12	spx9	0.413991	-2.21953e-05
B11	13	spx9	0.410792	-0.00370204
B11	14	spx9	0.415755	0.000779399
B11	15	spx9	0.415077	-0.00037997
B11	16	spx9	0.416836	0.000897358
B11	17	spx9	0.417638	0.00121773
B11	18	spx9	0.423295	0.00639279
B11	19	spx9	0.434077	0.0166934
B11	20	spx9	0.457319	0.0394543
B11	21	spx9	0.499445	0.0810985
B11	22	spx9	0.578472	0.159645
B11	23	spx9	0.715775	0.296466
B11	24	spx9	0.950289	0.530498
B11	25	spx9	1.25262	0.832346
B11	26	spx9	1.5627	1.14195
B11	27	spx9	1.77223	1.35099
B11	28	spx9	1.942	1.52028
B11	29	spx9	2.09173	1.66954
B11	30	spx9	2.20871	1.78603
B11	31	spx9	2.29443	1.87127
B11	32	spx9	2.37746	1.95382
B11	33	spx9	2.44706	2.02294
B11	34	spx9	2.49948	2.07487
B11	35	spx9	2.54121	2.11612
B11	36	spx9	2.57647	2.1509
B11	37	spx9	2.61574	2.18969
B11	38	spx9	2.64022	2.21369
B11	39	spx9	2.65681	2.2298
B11	40	spx9	2.67843	2.25093
B12	1	spx9	0.578432	-0.0245032
B12	2	spx9	0.595515	-0.0105436
B12	3	spx9	0.598308	-0.0108747
B12	4	spx9	0.606541	-0.00576584
B12	5	spx9	0.617663	0.00223285
B12	6	spx9	0.623151	0.00459676
B12	7	spx9	0.626392	0.00471309
B12	8	spx9	0.629824	0.00502166
B12	9	spx9	0.633004	0.00507815
B12	10	spx9	0.631917	0.00086665
B12	11	spx9	0.638263	0.00408863
B12	12	spx9	0.637976	0.000678215
B12	13	spx9	0.638839	-0.00158284
B12	14	spx9	0.642481	-0.00106548
B12	15	spx9	0.645122	-0.00154829
B12	16	spx9	0.647233	-0.00256069
B12	17	spx9	0.647127	-0.0057908
B12	18	spx9	0.657955	0.00191261
B12	19	spx9	0.667683	0.00851715
B12	20	spx9	0.688948	0.0266586
B12	21	spx9	0.727265	0.061851
B12	22	spx9	0.808003	0.139465
B12	23	spx9	0.941953	0.270291
B12	24	spx9	1.17418	0.499392
B12	25	spx9	1.47634	0.798431
B12	26	spx9	1.77151	1.09047
B12	27	spx9	1.97124	1.28709
B12	28	spx9	2.13576	1.44848
B12	29	spx9	2.27286	1.58245
B12	30	spx9	2.39438	1.70085
B12	31	spx9	2.48253	1.78588
B12	32	spx9	2.5558	1.85602
B12	33	spx9	2.62908	1.92618
B12	34	spx9	2.6685	1.96247
B12	35	spx9	2.71555	2.0064
B12	36	spx9	2.76169	2.04941
B12	37	spx9	2.79572	2.08033
B12	38	spx9	2.80709	2.08857
B12	39	spx9	2.82612	2.10448
B12	40	spx9	2.85528	2.13051
C1	1	spx6	0.289537	-0.00807613
C1	2	spx6	0.29125	-0.00683528
C1	3	spx6	0.295123	-0.0034354
C1	4	spx6	0.298087	-0.000943687
C1	5	spx6	0.299754	0.000251208
C1	6	spx6	0.30047	0.000494933
C1	7	spx6	0.303217	0.00276951
C1	8	spx6	0.304335	0.00341446
C1	9	spx6	0.299609	-0.0017839
C1	10	spx6	0.301337	-0.000527848
C1	11	spx6	0.30299	0.000652444
C1	12	spx6	0.304687	0.00187696
C1	13	spx6	0.303405	0.000122591
C1	14	spx6	0.30386	0.000105605
C1	15	spx6	0.305369	0.0011415
C1	16	spx6	0.303508	-0.00119133
C1	17	spx6	0.305706	0.000533957
C1	18	spx6	0.304043	-0.00160138
C1	19	spx6	0.304637	-0.00148038
C1	20	spx6	0.302194	-0.00439576
C1	21	spx6	0.305542	-0.00151951
C1	22	spx6	0.31305	0.00551602
C1	23	spx6	0.31814	0.0101334
C1	24	spx6	0.333267	0.024788
C1	25	spx6	0.36019	0.0512386
C1	26	spx6	0.420073	0.110649
C1	27	spx6	0.517582	0.207686
C1	28	spx6	0.693961	0.383592
C1	29	spx6	0.942121	0.631279
C1	30	spx6	1.20106	0.889746
C1	31	spx6	1.3339	1.02212
C1	32	spx6	1.50068	1.18842
C1	33	spx6	1.65084	1.33811
C1	34	spx6	1.76847	1.45527
C1	35	spx6	1.87472	1.56105
C1	36	spx6	1.96814	1.654
C1	37	spx6	2.0444	1.72978
C1	38	spx6	2.10052	1.78543
C1	39	spx6	2.15481	1.83925
C1	40	spx6	2.20102	1.88498
C2	1	spx6	0.261263	-0.00594012
C2	2	spx6	0.265222	-0.00223585
C2	3	spx6	0.268706	0.000993611
C2	4	spx6	0.268678	0.000711316
C2	5	spx6	0.269074	0.000852036
C2	6	spx6	0.267968	-0.00050809
C2	7	spx6	0.269489	0.000758293
C2	8	spx6	0.269223	0.000237997
C2	9	spx6	0.268628	-0.000611674
C2	10	spx6	0.268991	-0.000503349
C2	11	spx6	0.270405	0.000656222
C2	12	spx6	0.26983	-0.000173571
C2	13	spx6	0.269028	-0.0012298
C2	14	spx6	0.270442	-7.02905e-05
C2	15	spx6	0.269167	-0.0016002
C2	16	spx6	0.267111	-0.00391051
C2	17	spx6	0.271045	-0.000231214
C2	18	spx6	0.270572	-0.000959233
C2	19	spx6	0.274273	0.00248755
C2	20	spx6	0.271531	-0.000509351
C2	21	spx6	0.272904	0.000609451
C2	22	spx6	0.27555	0.00300081
C2	23	spx6	0.280226	0.00742231
C2	24	spx6	0.293466	0.0204079
C2	25	spx6	0.313929	0.0406156
C2	26	spx6	0.354745	0.0811772
C2	27	spx6	0.425788	0.151966
C2	28	spx6	0.555735	0.281658
C2	29	spx6	0.739061	0.46473
C2	30	spx6	0.915678	0.641092
C2	31	spx6	1.01779	0.74295
C2	32	spx6	1.15034	0.875248
C2	33	spx6	1.26581	0.990463
C2	34	spx6	1.37461	1.09901
C2	35	spx6	1.47057	1.19471
C2	36	spx6	1.55181	1.27569
C2	37	spx6	1.6245	1.34814
C2	38	spx6	1.6811	1.40448
C2	39	spx6	1.7321	1.45523
C2	40	spx6	1.77511	1.49797
C3	1	spx6	0.282767	-0.00221791
C3	2	spx6	0.283818	-0.00116458
C3	3	spx6	0.287787	0.00280601
C3	4	spx6	0.286136	0.0011569
C3	5	spx6	0.285162	0.000184721
C3	6	spx6	0.284748	-0.000227982
C3	7	spx6	0.285579	0.000604575
C3	8	spx6	0.286739	0.00176669
C3	9	spx6	0.283263	-0.00170767
C3	10	spx6	0.284526	-0.000442769
C3	11	spx6	0.281931	-0.00303691
C3	12	spx6	0.284081	-0.00088456
C3	13	spx6	0.284618	-0.000346479
C3	14	spx6	0.283438	-0.00152489
C3	15	spx6	0.282458	-0.00250256
C3	16	spx6	0.285279	0.000319572
C3	17	spx6	0.284043	-0.000914751
C3	18	spx6	0.285059	0.000103772
C3	19	spx6	0.28412	-0.000834107
C3	20	spx6	0.284246	-0.000706434
C3	21	spx6	0.286274	0.00132304
C3	22	spx6	0.289813	0.00486383
C3	23	spx6	0.299507	0.0145599
C3	24	spx6	0.312156	0.0272102
C3	25	spx6	0.3362	0.0512562
C3	26	spx6	0.386143	0.101201
C3	27	spx6	0.478076	0.193135
C3	28	spx6	0.642544	0.357605
C3	29	spx6	0.895565	0.610628
C3	30	spx6	1.1748	0.889869
C3	31	spx6	1.35659	1.07166
C3	32	spx6	1.52838	1.24345
C3	33	spx6	1.68891	1.40398
C3	34	spx6	1.84067	1.55574
C3	35	spx6	1.95859	1.67367
C3	36	spx6	2.0593	1.77438
C3	37	spx6	2.13631	1.85139
C3	38	spx6	2.20393	1.91901
C3	39	spx6	2.26864	1.98372
C3	40	spx6	2.32118	2.03626
C4	1	spx7	0.29971	-0.00133234
C4	2	spx7	0.301954	0.00117985
C4	3	spx7	0.302431	0.00192516
C4	4	spx7	0.300156	-8.1214e-05
C4	5	spx7	0.304079	0.00410918
C4	6	spx7	0.300159	0.00045769
C4	7	spx7	0.298814	-0.000619475
C4	8	spx7	0.300107	0.000941401
C4	9	spx7	0.298199	-0.000697807
C4	10	spx7	0.29682	-0.00180933
C4	11	spx7	0.299154	0.000792924
C4	12	spx7	0.29714	-0.000952619
C4	13	spx7	0.293376	-0.00444821
C4	14	spx7	0.294951	-0.00260493
C4	15	spx7	0.297792	0.00050364
C4	16	spx7	0.293808	-0.00321234
C4	17	spx7	0.294371	-0.00238046
C4	18	spx7	0.294626	-0.00185742
C4	19	spx7	0.295142	-0.00107313
C4	20	spx7	0.299519	0.00357115
C4	21	spx7	0.303115	0.00743581
C4	22	spx7	0.309257	0.0138455
C4	23	spx7	0.328854	0.033711
C4	24	spx7	0.357778	0.062903
C4	25	spx7	0.427077	0.13247
C4	26	spx7	0.543058	0.24872
C4	27	spx7	0.743916	0.449846
C4	28	spx7	1.05585	0.762049
C4	29	spx7	1.44878	1.15524
C4	30	spx7	1.83303	1.53976
C4	31	spx7	2.06957	1.77658
C4	32	spx7	2.2161	1.92337
C4	33	spx7	2.35841	2.06595
C4	34	spx7	2.46859	2.1764
C4	35	spx7	2.55287	2.26094
C4	36	spx7	2.62157	2.32991
C4	37	spx7	2.67585	2.38447
C4	38	spx7	2.72223	2.43111
C4	39	spx7	2.75189	2.46104
C4	40	spx7	2.77675	2.48617
C5	1	spx7	0.303518	0.00200744
C5	2	spx7	0.302383	0.000963444
C5	3	spx7	0.302468	0.0011394
C5	4	spx7	0.301993	0.000755822
C5	5	spx7	0.302184	0.00103776
C5	6	spx7	0.301238	0.000182586
C5	7	spx7	0.302332	0.00136717
C5	8	spx7	0.301964	0.00109032
C5	9	spx7	0.300876	9.40895e-05
C5	10	spx7	0.300803	0.000111619
C5	11	spx7	0.298534	-0.002066
C5	12	spx7	0.298648	-0.00186069
C5	13	spx7	0.297552	-0.00286565
C5	14	spx7	0.29894	-0.00138742
C5	15	spx7	0.300329	9.29906e-05
C5	16	spx7	0.297506	-0.00263907
C5	17	spx7	0.29942	-0.000634294
C5	18	spx7	0.299274	-0.00068835
C5	19	spx7	0.299113	-0.00075832
C5	20	spx7	0.300208	0.000427013
C5	21	spx7	0.306291	0.00660102
C5	22	spx7	0.314793	0.0151943
C5	23	spx7	0.336763	0.0372558
C5	24	spx7	0.372813	0.0733965
C5	25	spx7	0.448061	0.148736
C5	26	spx7	0.580284	0.28105
C5	27	spx7	0.802068	0.502925
C5	28	spx7	1.13944	0.840392
C5	29	spx7	1.54473	1.24577
C5	30	spx7	1.9098	1.61093
C5	31	spx7	2.10451	1.80573
C5	32	spx7	2.26837	1.96968
C5	33	spx7	2.39842	2.09982
C5	34	spx7	2.50948	2.21098
C5	35	spx7	2.59385	2.29544
C5	36	spx7	2.65438	2.35606
C5	37	spx7	2.69618	2.39795
C5	38	spx7	2.73633	2.43819
C5	39	spx7	2.77524	2.47719
C5	40	spx7	2.79967	2.50172
C6	1	spx7	0.347206	-0.00211632
C6	2	spx7	0.347767	-0.000805512
C6	3	spx7	0.34947	0.00164673
C6	4	spx7	0.349882	0.00280841
C6	5	spx7	0.34565	-0.000673922
C6	6	spx7	0.346219	0.000645024
C6	7	spx7	0.344337	-0.000486944
C6	8	spx7	0.345303	0.00122828
C6	9	spx7	0.341428	-0.00189752
C6	10	spx7	0.341868	-0.000707677
C6	11	spx7	0.344843	0.0030173
C6	12	spx7	0.337854	-0.00322213
C6	13	spx7	0.338758	-0.00156818
C6	14	spx7	0.337755	-0.00182175
C6	15	spx7	0.337729	-0.00109867
C6	16	spx7	0.334038	-0.00403937
C6	17	spx7	0.335899	-0.00142927
C6	18	spx7	0.336396	-0.000182655
C6	19	spx7	0.335701	-0.000127655
C6	20	spx7	0.33764	0.00256071
C6	21	spx7	0.339679	0.0053493
C6	22	spx7	0.34915	0.01557
C6	23	spx7	0.360486	0.027656
C6	24	spx7	0.385755	0.0536743
C6	25	spx7	0.436198	0.104867
C6	26	spx7	0.518035	0.187454
C6	27	spx7	0.638928	0.309096
C6	28	spx7	0.772196	0.443114
C6	29	spx7	0.868101	0.539769
C6	30	spx7	0.962841	0.635258
C6	31	spx7	1.0618	0.734964
C6	32	spx7	1.18308	0.857
C6	33	spx7	1.28481	0.959478
C6	34	spx7	1.37312	1.04853
C6	35	spx7	1.45676	1.13292
C6	36	spx7	1.51838	1.1953
C6	37	spx7	1.58024	1.2579
C6	38	spx7	1.62684	1.30525
C6	39	spx7	1.67785	1.35701
C6	40	spx7	1.7116	1.39151
C7	1	spx8	0.262461	-0.00137114
C7	2	spx8	0.265452	0.00178646
C7	3	spx8	0.265522	0.00202377
C7	4	spx8	0.265394	0.00206322
C7	5	spx8	0.263115	-4.78634e-05
C7	6	spx8	0.263449	0.000453344
C7	7	spx8	0.262013	-0.000815974
C7	8	spx8	0.262938	0.000276392
C7	9	spx8	0.262325	-0.000169488
C7	10	spx8	0.263495	0.00116854
C7	11	spx8	0.261979	-0.000180679
C7	12	spx8	0.262128	0.000135367
C7	13	spx8	0.260978	-0.000846806
C7	14	spx8	0.261303	-0.00035451
C7	15	spx8	0.259714	-0.00177671
C7	16	spx8	0.258222	-0.0031012
C7	17	spx8	0.260759	-0.000396733
C7	18	spx8	0.259632	-0.00135667
C7	19	spx8	0.258533	-0.00228756
C7	20	spx8	0.260778	0.000123801
C7	21	spx8	0.260521	3.47736e-05
C7	22	spx8	0.257958	-0.00236066
C7	23	spx8	0.259571	-0.000580839
C7	24	spx8	0.25923	-0.000754356
C7	25	spx8	0.263379	0.00356128
C7	26	spx8	0.264839	0.00518955
C7	27	spx8	0.271409	0.0119264
C7	28	spx8	0.28198	0.0226647
C7	29	spx8	0.303796	0.0446481
C7	30	spx8	0.353045	0.0940643
C7	31	spx8	0.442036	0.183223
C7	32	spx8	0.600223	0.341577
C7	33	spx8	0.857897	0.599418
C7	34	spx8	1.20926	0.950953
C7	35	spx8	1.59008	1.33193
C7	36	spx8	1.83097	1.57299
C7	37	spx8	1.96933	1.71152
C7	38	spx8	2.13934	1.8817
C7	39	spx8	2.26563	2.00815
C7	40	spx8	2.35796	2.10065
C8	1	spx8	0.291727	-0.00137917
C8	2	spx8	0.295176	0.00233666
C8	3	spx8	0.293171	0.000598311
C8	4	spx8	0.293664	0.00135847
C8	5	spx8	0.293879	0.00184009
C8	6	spx8	0.291147	-0.000625551
C8	7	spx8	0.291778	0.000271728
C8	8	spx8	0.29185	0.00061054
C8	9	spx8	0.290794	-0.000178099
C8	10	spx8	0.289155	-0.00155077
C8	11	spx8	0.290209	-0.000230302
C8	12	spx8	0.289854	-0.00031817
C8	13	spx8	0.289383	-0.000522653
C8	14	spx8	0.289299	-0.000339737
C8	15	spx8	0.290064	0.000691921
C8	16	spx8	0.288273	-0.000832866
C8	17	spx8	0.288949	0.000109891
C8	18	spx8	0.285956	-0.00261661
C8	19	spx8	0.287071	-0.00123418
C8	20	spx8	0.288424	0.000385265
C8	21	spx8	0.286891	-0.000881553
C8	22	spx8	0.285114	-0.00239132
C8	23	spx8	0.287247	8.26525e-06
C8	24	spx8	0.287305	0.000333309
C8	25	spx8	0.287665	0.000960042
C8	26	spx8	0.290993	0.00455398
C8	27	spx8	0.294316	0.00814444
C8	28	spx8	0.305021	0.0191156
C8	29	spx8	0.322737	0.0370988
C8	30	spx8	0.36312	0.0777478
C8	31	spx8	0.431583	0.146478
C8	32	spx8	0.5587	0.273861
C8	33	spx8	0.775433	0.490861
C8	34	spx8	1.10224	0.817938
C8	35	spx8	1.48298	1.19894
C8	36	spx8	1.78185	1.49808
C8	37	spx8	1.92564	1.64213
C8	38	spx8	2.08572	1.80248
C8	39	spx8	2.22543	1.94246
C8	40	spx8	2.33171	2.049
C9	1	spx8	0.385537	0.000776929
C9	2	spx8	0.388478	0.00393332
C9	3	spx8	0.390056	0.00572754
C9	4	spx8	0.387174	0.00306083
C9	5	spx8	0.384952	0.0010542
C9	6	spx8	0.385263	0.00158015
C9	7	spx8	0.382155	-0.00131177
C9	8	spx8	0.382872	-0.000379768
C9	9	spx8	0.382079	-0.000957755
C9	10	spx8	0.382684	-0.000137269
C9	11	spx8	0.383483	0.000877856
C9	12	spx8	0.379696	-0.00269464
C9	13	spx8	0.379178	-0.00299692
C9	14	spx8	0.382069	0.000109459
C9	15	spx8	0.378184	-0.00355948
C9	16	spx8	0.379007	-0.00252194
C9	17	spx8	0.378886	-0.00242723
C9	18	spx8	0.379238	-0.00185982
C9	19	spx8	0.379643	-0.00123937
C9	20	spx8	0.379157	-0.00150983
C9	21	spx8	0.377556	-0.00289564
C9	22	spx8	0.379978	-0.000257716
C9	23	spx8	0.378741	-0.00127991
C9	24	spx8	0.381185	0.00137947
C9	25	spx8	0.381027	0.0014375
C9	26	spx8	0.383789	0.00441454
C9	27	spx8	0.385547	0.00638751
C9	28	spx8	0.394799	0.0158551
C9	29	spx8	0.411966	0.0332375
C9	30	spx8	0.447593	0.0690802
C9	31	spx8	0.510811	0.132514
C9	32	spx8	0.631326	0.253244
C9	33	spx8	0.836224	0.458358
C9	34	spx8	1.13653	0.758882
C9	35	spx8	1.49128	1.11385
C9	36	spx8	1.77514	1.39792
C9	37	spx8	1.90128	1.52428
C9	38	spx8	2.04697	1.67018
C9	39	spx8	2.18271	1.80613
C9	40	spx8	2.27518	1.89882
C10	1	spx9	0.362207	0.00140312
C10	2	spx9	0.361415	0.000615128
C10	3	spx9	0.360963	0.000167208
C10	4	spx9	0.362269	0.00147769
C10	5	spx9	0.362043	0.0012557
C10	6	spx9	0.360973	0.000190035
C10	7	spx9	0.360296	-0.00048331
C10	8	spx9	0.362744	0.00196934
C10	9	spx9	0.362023	0.00125252
C10	10	spx9	0.360522	-0.000244595
C10	11	spx9	0.358731	-0.0020315
C10	12	spx9	0.358929	-0.00182914
C10	13	spx9	0.360021	-0.000733713
C10	14	spx9	0.357337	-0.00341359
C10	15	spx9	0.358058	-0.00268783
C10	16	spx9	0.359768	-0.000974339
C10	17	spx9	0.360726	-1.1744e-05
C10	18	spx9	0.35886	-0.00187372
C10	19	spx9	0.363721	0.0029911
C10	20	spx9	0.365706	0.0049799
C10	21	spx9	0.375601	0.014879
C10	22	spx9	0.391548	0.0308301
C10	23	spx9	0.420546	0.059832
C10	24	spx9	0.4776	0.116891
C10	25	spx9	0.580951	0.220246
C10	26	spx9	0.758971	0.39827
C10	27	spx9	1.02349	0.662797
C10	28	spx9	1.3387	0.978008
C10	29	spx9	1.59722	1.23653
C10	30	spx9	1.79842	1.43773
C10	31	spx9	1.95106	1.59038
C10	32	spx9	2.09676	1.73609
C10	33	spx9	2.21065	1.84998
C10	34	spx9	2.30085	1.94018
C10	35	spx9	2.37247	2.0118
C10	36	spx9	2.43234	2.07168
C10	37	spx9	2.48714	2.12648
C10	38	spx9	2.52257	2.16192
C10	39	spx9	2.56757	2.20692
C10	40	spx9	2.59825	2.2376
C11	1	spx9	0.337142	-0.00530315
C11	2	spx9	0.340296	-0.00232336
C11	3	spx9	0.344988	0.00219424
C11	4	spx9	0.342346	-0.00062193
C11	5	spx9	0.342899	-0.000242422
C11	6	spx9	0.344313	0.000997211
C11	7	spx9	0.344283	0.000792683
C11	8	spx9	0.342736	-0.000928008
C11	9	spx9	0.343628	-0.00021078
C11	10	spx9	0.345402	0.00138988
C11	11	spx9	0.343708	-0.000478603
C11	12	spx9	0.343974	-0.000386717
C11	13	spx9	0.343612	-0.000922468
C11	14	spx9	0.342557	-0.00215249
C11	15	spx9	0.344592	-0.000290887
C11	16	spx9	0.342564	-0.00249363
C11	17	spx9	0.343693	-0.00153804
C11	18	spx9	0.341381	-0.00402442
C11	19	spx9	0.34802	0.00244061
C11	20	spx9	0.35223	0.00647579
C11	21	spx9	0.359775	0.0138476
C11	22	spx9	0.377417	0.0313148
C11	23	spx9	0.406252	0.0599762
C11	24	spx9	0.468881	0.122431
C11	25	spx9	0.580632	0.234007
C11	26	spx9	0.771992	0.425194
C11	27	spx9	1.04942	0.702449
C11	28	spx9	1.36676	1.01961
C11	29	spx9	1.62366	1.27634
C11	30	spx9	1.81994	1.47245
C11	31	spx9	1.97632	1.62865
C11	32	spx9	2.11648	1.76864
C11	33	spx9	2.23243	1.88442
C11	34	spx9	2.31705	1.96886
C11	35	spx9	2.38637	2.038
C11	36	spx9	2.44833	2.09979
C11	37	spx9	2.50209	2.15338
C11	38	spx9	2.54458	2.19569
C11	39	spx9	2.58051	2.23145
C11	40	spx9	2.61044	2.26121
C12	1	spx9	0.398581	-0.0103646
C12	2	spx9	0.402691	-0.00683922
C12	3	spx9	0.404334	-0.00578252
C12	4	spx9	0.409262	-0.00143948
C12	5	spx9	0.414357	0.00307015
C12	6	spx9	0.415347	0.00347526
C12	7	spx9	0.412126	-0.000331774
C12	8	spx9	0.415084	0.00204112
C12	9	spx9	0.414416	0.000787461
C12	10	spx9	0.416166	0.00195205
C12	11	spx9	0.413399	-0.00140068
C12	12	spx9	0.415564	0.000179596
C12	13	spx9	0.416892	0.00092147
C12	14	spx9	0.417009	0.000453786
C12	15	spx9	0.417428	0.000286898
C12	16	spx9	0.41508	-0.00264594
C12	17	spx9	0.416597	-0.00171512
C12	18	spx9	0.415594	-0.00330272
C12	19	spx9	0.420644	0.00116203
C12	20	spx9	0.422356	0.00228841
C12	21	spx9	0.430051	0.00939791
C12	22	spx9	0.44416	0.0229215
C12	23	spx9	0.473652	0.0518279
C12	24	spx9	0.528508	0.106099
C12	25	spx9	0.616023	0.193028
C12	26	spx9	0.767996	0.344416
C12	27	spx9	0.958547	0.534382
C12	28	spx9	1.16602	0.741269
C12	29	spx9	1.34302	0.917679
C12	30	spx9	1.4949	1.06898
C12	31	spx9	1.63237	1.20586
C12	32	spx9	1.7721	1.345
C12	33	spx9	1.89409	1.46641
C12	34	spx9	1.99055	1.56228
C12	35	spx9	2.08511	1.65626
C12	36	spx9	2.1638	1.73436
C12	37	spx9	2.23763	1.80762
C12	38	spx9	2.29814	1.86754
C12	39	spx9	2.34381	1.91262
C12	40	spx9	2.38889	1.95711
D1	1	spx6	0.311912	-0.00427674
D1	2	spx6	0.315323	-0.00126396
D1	3	spx6	0.316477	-0.000508338
D1	4	spx6	0.317953	0.000570487
D1	5	spx6	0.316737	-0.00104389
D1	6	spx6	0.319936	0.001757
D1	7	spx6	0.318442	-0.000134663
D1	8	spx6	0.318923	-5.18607e-05
D1	9	spx6	0.318475	-0.000897461
D1	10	spx6	0.319758	-1.24401e-05
D1	11	spx6	0.320322	0.000152884
D1	12	spx6	0.317935	-0.00263222
D1	13	spx6	0.32226	0.00129547
D1	14	spx6	0.323553	0.00219006
D1	15	spx6	0.321943	0.000182075
D1	16	spx6	0.322617	0.000457906
D1	17	spx6	0.323338	0.000781124
D1	18	spx6	0.321451	-0.00150384
D1	19	spx6	0.322367	-0.000985953
D1	20	spx6	0.32346	-0.000291071
D1	21	spx6	0.324824	0.000674743
D1	22	spx6	0.32991	0.00536269
D1	23	spx6	0.340356	0.015411
D1	24	spx6	0.359014	0.0336709
D1	25	spx6	0.399166	0.0734249
D1	26	spx6	0.475855	0.149716
D1	27	spx6	0.606037	0.2795
D1	28	spx6	0.82832	0.501385
D1	29	spx6	1.11137	0.784038
D1	30	spx6	1.3514	1.02367
D1	31	spx6	1.48558	1.15745
D1	32	spx6	1.66313	1.3346
D1	33	spx6	1.81589	1.48697
D1	34	spx6	1.94008	1.61076
D1	35	spx6	2.04902	1.7193
D1	36	spx6	2.13307	1.80295
D1	37	spx6	2.21385	1.88333
D1	38	spx6	2.27359	1.94268
D1	39	spx6	2.31677	1.98546
D1	40	spx6	2.36599	2.03428
D2	1	spx6	0.260686	-0.00431659
D2	2	spx6	0.262815	-0.00241578
D2	3	spx6	0.265794	0.000335348
D2	4	spx6	0.267449	0.00176251
D2	5	spx6	0.265975	5.95014e-05
D2	6	spx6	0.264192	-0.00195139
D2	7	spx6	0.267597	0.00122487
D2	8	spx6	0.265454	-0.00114556
D2	9	spx6	0.26643	-0.000397926
D2	10	spx6	0.270095	0.00303869
D2	11	spx6	0.265546	-0.00173858
D2	12	spx6	0.265083	-0.00243027
D2	13	spx6	0.2687	0.000958594
D2	14	spx6	0.269733	0.00176351
D2	15	spx6	0.267596	-0.000601881
D2	16	spx6	0.266965	-0.00146068
D2	17	spx6	0.269244	0.000590126
D2	18	spx6	0.268344	-0.000538649
D2	19	spx6	0.267266	-0.00184433
D2	20	spx6	0.268689	-0.000649808
D2	21	spx6	0.26776	-0.00180678
D2	22	spx6	0.274628	0.00483272
D2	23	spx6	0.279751	0.00972702
D2	24	spx6	0.295121	0.0248697
D2	25	spx6	0.323244	0.0527638
D2	26	spx6	0.375352	0.104644
D2	27	spx6	0.464502	0.193565
D2	28	spx6	0.618283	0.347119
D2	29	spx6	0.800724	0.529331
D2	30	spx6	0.952509	0.680888
D2	31	spx6	1.06357	0.791719
D2	32	spx6	1.21942	0.947344
D2	33	spx6	1.35606	1.08376
D2	34	spx6	1.48951	1.21698
D2	35	spx6	1.60667	1.33391
D2	36	spx6	1.7079	1.43491
D2	37	spx6	1.80394	1.53072
D2	38	spx6	1.8779	1.60445
D2	39	spx6	1.95191	1.67823
D2	40	spx6	2.0137	1.7398
D3	1	spx6	0.352985	0.00524348
D3	2	spx6	0.35019	0.00242676
D3	3	spx6	0.350037	0.00225098
D3	4	spx6	0.348626	0.000818193
D3	5	spx6	0.351118	0.00328778
D3	6	spx6	0.348932	0.00107975
D3	7	spx6	0.345597	-0.00227716
D3	8	spx6	0.348181	0.000284785
D3	9	spx6	0.347027	-0.000891581
D3	10	spx6	0.346129	-0.00181108
D3	11	spx6	0.34827	0.000307795
D3	12	spx6	0.347023	-0.000961405
D3	13	spx6	0.348126	0.000118682
D3	14	spx6	0.346111	-0.00191787
D3	15	spx6	0.345099	-0.00295184
D3	16	spx6	0.344232	-0.00384091
D3	17	spx6	0.347337	-0.000758496
D3	18	spx6	0.347534	-0.000583655
D3	19	spx6	0.348445	0.000305161
D3	20	spx6	0.348363	0.000201529
D3	21	spx6	0.350033	0.00184962
D3	22	spx6	0.353696	0.00548972
D3	23	spx6	0.359168	0.0109399
D3	24	spx6	0.374154	0.0259035
D3	25	spx6	0.399949	0.0516765
D3	26	spx6	0.450464	0.102169
D3	27	spx6	0.538848	0.190531
D3	28	spx6	0.690164	0.341825
D3	29	spx6	0.870727	0.522366
D3	30	spx6	1.03035	0.681966
D3	31	spx6	1.137	0.788591
D3	32	spx6	1.29072	0.942297
D3	33	spx6	1.42613	1.07768
D3	34	spx6	1.55798	1.20951
D3	35	spx6	1.67873	1.33024
D3	36	spx6	1.77648	1.42797
D3	37	spx6	1.86865	1.52011
D3	38	spx6	1.94341	1.59485
D3	39	spx6	2.02008	1.6715
D3	40	spx6	2.07429	1.72569
D4	1	spx7	0.309527	0.00115495
D4	2	spx7	0.309995	0.00193777
D4	3	spx7	0.30991	0.00216721
D4	4	spx7	0.310469	0.00304044
D4	5	spx7	0.305779	-0.00133544
D4	6	spx7	0.306472	-0.000327823
D4	7	spx7	0.30768	0.00119561
D4	8	spx7	0.306233	6.26083e-05
D4	9	spx7	0.306721	0.000865419
D4	10	spx7	0.303942	-0.00159939
D4	11	spx7	0.302794	-0.00243314
D4	12	spx7	0.301881	-0.00303119
D4	13	spx7	0.30318	-0.00141775
D4	14	spx7	0.303485	-0.000797513
D4	15	spx7	0.301623	-0.002345
D4	16	spx7	0.302232	-0.00142227
D4	17	spx7	0.302336	-0.00100301
D4	18	spx7	0.305235	0.00221045
D4	19	spx7	0.308881	0.00617079
D4	20	spx7	0.312349	0.00995347
D4	21	spx7	0.323604	0.0215227
D4	22	spx7	0.349751	0.0479845
D4	23	spx7	0.393791	0.0923387
D4	24	spx7	0.481672	0.180535
D4	25	spx7	0.637548	0.336726
D4	26	spx7	0.896384	0.595876
D4	27	spx7	1.24975	0.949557
D4	28	spx7	1.65111	1.35123
D4	29	spx7	1.96408	1.66452
D4	30	spx7	2.14445	1.8452
D4	31	spx7	2.268	1.96907
D4	32	spx7	2.40199	2.10337
D4	33	spx7	2.49242	2.19412
D4	34	spx7	2.56384	2.26585
D4	35	spx7	2.63317	2.33549
D4	36	spx7	2.67063	2.37326
D4	37	spx7	2.70135	2.4043
D4	38	spx7	2.74481	2.44808
D4	39	spx7	2.761	2.46458
D4	40	spx7	2.77645	2.48034
D5	1	spx7	0.320626	-0.00246903
D5	2	spx7	0.322563	-0.000414343
D5	3	spx7	0.3229	4.12073e-05
D5	4	spx7	0.326174	0.00343309
D5	5	spx7	0.320652	-0.00197097
D5	6	spx7	0.323022	0.000517216
D5	7	spx7	0.323408	0.0010206
D5	8	spx7	0.322432	0.000163148
D5	9	spx7	0.322597	0.000445696
D5	10	spx7	0.322489	0.000455195
D5	11	spx7	0.320228	-0.00168748
D5	12	spx7	0.320081	-0.00171628
D5	13	spx7	0.319563	-0.00211641
D5	14	spx7	0.320268	-0.00129358
D5	15	spx7	0.319246	-0.00219779
D5	16	spx7	0.320946	-0.00037908
D5	17	spx7	0.320913	-0.000294271
D5	18	spx7	0.322405	0.0013157
D5	19	spx7	0.325236	0.00426401
D5	20	spx7	0.331025	0.0101715
D5	21	spx7	0.34561	0.0248749
D5	22	spx7	0.370254	0.0496365
D5	23	spx7	0.42018	0.0996803
D5	24	spx7	0.509864	0.189482
D5	25	spx7	0.673162	0.352898
D5	26	spx7	0.936404	0.616258
D5	27	spx7	1.30608	0.986056
D5	28	spx7	1.71272	1.39281
D5	29	spx7	2.03584	1.71604
D5	30	spx7	2.21794	1.89827
D5	31	spx7	2.34859	2.02904
D5	32	spx7	2.48057	2.16114
D5	33	spx7	2.57969	2.26037
D5	34	spx7	2.66582	2.34662
D5	35	spx7	2.71604	2.39695
D5	36	spx7	2.75565	2.43669
D5	37	spx7	2.80039	2.48155
D5	38	spx7	2.82222	2.50349
D5	39	spx7	2.84794	2.52933
D5	40	spx7	2.86131	2.54282
D6	1	spx7	0.364325	-0.0029052
D6	2	spx7	0.368278	0.00116432
D6	3	spx7	0.367892	0.000893934
D6	4	spx7	0.366386	-0.000495289
D6	5	spx7	0.368202	0.00143636
D6	6	spx7	0.368346	0.00169729
D6	7	spx7	0.368149	0.00161618
D6	8	spx7	0.366195	-0.000221744
D6	9	spx7	0.364671	-0.00162897
D6	10	spx7	0.36501	-0.0011739
D6	11	spx7	0.364872	-0.00119583
D6	12	spx7	0.365352	-0.000600094
D6	13	spx7	0.363839	-0.00199629
D6	14	spx7	0.364309	-0.00140998
D6	15	spx7	0.365259	-0.000343787
D6	16	spx7	0.364199	-0.00128803
D6	17	spx7	0.364515	-0.000855915
D6	18	spx7	0.365853	0.000598302
D6	19	spx7	0.370106	0.00496775
D6	20	spx7	0.375627	0.0106048
D6	21	spx7	0.389584	0.0246784
D6	22	spx7	0.414329	0.0495391
D6	23	spx7	0.462089	0.0974156
D6	24	spx7	0.551314	0.186757
D6	25	spx7	0.715632	0.351191
D6	26	spx7	0.97611	0.611785
D6	27	spx7	1.33124	0.96703
D6	28	spx7	1.72689	1.36279
D6	29	spx7	2.01801	1.65404
D6	30	spx7	2.18919	1.82533
D6	31	spx7	2.31088	1.94714
D6	32	spx7	2.44791	2.08428
D6	33	spx7	2.53684	2.17333
D6	34	spx7	2.60429	2.2409
D6	35	spx7	2.66895	2.30567
D6	36	spx7	2.70881	2.34565
D6	37	spx7	2.74362	2.38057
D6	38	spx7	2.76118	2.39825
D6	39	spx7	2.79286	2.43004
D6	40	spx7	2.81016	2.44746
D7	1	spx8	0.252507	-0.000782037
D7	2	spx8	0.25388	0.000808747
D7	3	spx8	0.253483	0.000628676
D7	4	spx8	0.252087	-0.000549384
D7	5	spx8	0.252272	-0.000147535
D7	6	spx8	0.251447	-0.00075506
D7	7	spx8	0.253448	0.00146318
D7	8	spx8	0.253449	0.00168178
D7	9	spx8	0.248339	-0.00321053
D7	10	spx8	0.253423	0.00209072
D7	11	spx8	0.253122	0.00200712
D7	12	spx8	0.250642	-0.000254528
D7	13	spx8	0.25053	-0.000149688
D7	14	spx8	0.249345	-0.00111696
D7	15	spx8	0.251014	0.000768929
D7	16	spx8	0.24785	-0.00217739
D7	17	spx8	0.250783	0.000973095
D7	18	spx8	0.248446	-0.00114654
D7	19	spx8	0.248661	-0.000713443
D7	20	spx8	0.246526	-0.00263135
D7	21	spx8	0.250612	0.00167176
D7	22	spx8	0.247274	-0.00144858
D7	23	spx8	0.246143	-0.00236162
D7	24	spx8	0.24963	0.00134294
D7	25	spx8	0.252104	0.00403441
D7	26	spx8	0.258182	0.0103291
D7	27	spx8	0.268465	0.0208303
D7	28	spx8	0.291832	0.0444145
D7	29	spx8	0.332431	0.0852308
D7	30	spx8	0.411851	0.164869
D7	31	spx8	0.559411	0.312646
D7	32	spx8	0.799677	0.55313
D7	33	spx8	1.14161	0.895275
D7	34	spx8	1.51554	1.26943
D7	35	spx8	1.78426	1.53837
D7	36	spx8	1.91042	1.66474
D7	37	spx8	2.07757	1.83211
D7	38	spx8	2.20758	1.96233
D7	39	spx8	2.31298	2.06796
D7	40	spx8	2.39041	2.1456
D8	1	spx8	0.240627	-0.00282366
D8	2	spx8	0.242552	-0.000635736
D8	3	spx8	0.242851	-7.28327e-05
D8	4	spx8	0.245409	0.00274797
D8	5	spx8	0.244584	0.00218719
D8	6	spx8	0.242728	0.000594657
D8	7	spx8	0.242556	0.0006857
D8	8	spx8	0.242497	0.000890365
D8	9	spx8	0.240504	-0.000839156
D8	10	spx8	0.239684	-0.00139654
D8	11	spx8	0.240239	-0.000578018
D8	12	spx8	0.239411	-0.00114243
D8	13	spx8	0.237564	-0.00272573
D8	14	spx8	0.240093	6.70598e-05
D8	15	spx8	0.235778	-0.00398466
D8	16	spx8	0.240427	0.000927343
D8	17	spx8	0.238609	-0.000627402
D8	18	spx8	0.238953	-1.99439e-05
D8	19	spx8	0.23875	4.11481e-05
D8	20	spx8	0.236867	-0.00157912
D8	21	spx8	0.23645	-0.0017323
D8	22	spx8	0.238024	0.000104872
D8	23	spx8	0.23834	0.000684376
D8	24	spx8	0.237609	0.000217207
D8	25	spx8	0.242679	0.00555024
D8	26	spx8	0.246835	0.00996974
D8	27	spx8	0.258623	0.0220214
D8	28	spx8	0.28256	0.0462213
D8	29	spx8	0.321957	0.0858819
D8	30	spx8	0.403648	0.167836
D8	31	spx8	0.550637	0.315089
D8	32	spx8	0.791492	0.556207
D8	33	spx8	1.12735	0.892326
D8	34	spx8	1.47155	1.23679
D8	35	spx8	1.68147	1.44697
D8	36	spx8	1.82839	1.59416
D8	37	spx8	1.99916	1.76519
D8	38	spx8	2.12795	1.89425
D8	39	spx8	2.23514	2.0017
D8	40	spx8	2.31896	2.08579
D9	1	spx8	0.3083	0.00291845
D9	2	spx8	0.307628	0.00241333
D9	3	spx8	0.3084	0.00335306
D9	4	spx8	0.308544	0.00366486
D9	5	spx8	0.304956	0.00024385
D9	6	spx8	0.304056	-0.00048845
D9	7	spx8	0.305583	0.00120602
D9	8	spx8	0.303793	-0.000416383
D9	9	spx8	0.301836	-0.0022061
D9	10	spx8	0.302915	-0.000959495
D9	11	spx8	0.303859	0.000151657
D9	12	spx8	0.303404	-0.000136439
D9	13	spx8	0.302276	-0.00109682
D9	14	spx8	0.30328	7.51328e-05
D9	15	spx8	0.301817	-0.00122046
D9	16	spx8	0.301333	-0.00153758
D9	17	spx8	0.300184	-0.00251865
D9	18	spx8	0.301252	-0.00128322
D9	19	spx8	0.298974	-0.00339373
D9	20	spx8	0.301469	-0.000731779
D9	21	spx8	0.299777	-0.00225643
D9	22	spx8	0.299973	-0.0018929
D9	23	spx8	0.303225	0.00152641
D9	24	spx8	0.300867	-0.0006637
D9	25	spx8	0.304176	0.00281239
D9	26	spx8	0.308965	0.00776875
D9	27	spx8	0.318346	0.0173174
D9	28	spx8	0.33447	0.0336089
D9	29	spx8	0.372858	0.0721644
D9	30	spx8	0.440688	0.140162
D9	31	spx8	0.567636	0.267278
D9	32	spx8	0.785235	0.485044
D9	33	spx8	1.09824	0.798218
D9	34	spx8	1.45912	1.15926
D9	35	spx8	1.74282	1.44313
D9	36	spx8	1.85925	1.55973
D9	37	spx8	2.0263	1.72694
D9	38	spx8	2.15668	1.85749
D9	39	spx8	2.25455	1.95553
D9	40	spx8	2.3289	2.03005
D10	1	spx9	0.451729	0.00233516
D10	2	spx9	0.45231	0.00296029
D10	3	spx9	0.452423	0.0031167
D10	4	spx9	0.450385	0.0011228
D10	5	spx9	0.450211	0.000992441
D10	6	spx9	0.448604	-0.000571378
D10	7	spx9	0.450912	0.0017805
D10	8	spx9	0.45152	0.00243266
D10	9	spx9	0.446482	-0.00256218
D10	10	spx9	0.446436	-0.00256415
D10	11	spx9	0.446388	-0.00256874
D10	12	spx9	0.446047	-0.00286578
D10	13	spx9	0.445915	-0.00295373
D10	14	spx9	0.44671	-0.00211468
D10	15	spx9	0.449602	0.000820609
D10	16	spx9	0.446171	-0.00256714
D10	17	spx9	0.448367	-0.000327202
D10	18	spx9	0.450028	0.00137811
D10	19	spx9	0.456058	0.00745117
D10	20	spx9	0.463273	0.0147102
D10	21	spx9	0.486581	0.0380623
D10	22	spx9	0.524337	0.0758622
D10	23	spx9	0.599935	0.151503
D10	24	spx9	0.730538	0.28215
D10	25	spx9	0.951379	0.503035
D10	26	spx9	1.25504	0.806736
D10	27	spx9	1.56199	1.11373
D10	28	spx9	1.80325	1.35503
D10	29	spx9	1.98492	1.53675
D10	30	spx9	2.13812	1.68999
D10	31	spx9	2.25799	1.80991
D10	32	spx9	2.3698	1.92176
D10	33	spx9	2.45145	2.00346
D10	34	spx9	2.51577	2.06782
D10	35	spx9	2.57986	2.13196
D10	36	spx9	2.63471	2.18685
D10	37	spx9	2.67451	2.22669
D10	38	spx9	2.7018	2.25402
D10	39	spx9	2.72767	2.27994
D10	40	spx9	2.75714	2.30945
D11	1	spx9	0.452196	-0.0125007
D11	2	spx9	0.460102	-0.00635576
D11	3	spx9	0.466802	-0.00141803
D11	4	spx9	0.466636	-0.00334503
D11	5	spx9	0.47463	0.00288668
D11	6	spx9	0.471795	-0.00171007
D11	7	spx9	0.475691	0.000424865
D11	8	spx9	0.478678	0.00165003
D11	9	spx9	0.479459	0.000669548
D11	10	spx9	0.482035	0.00148323
D11	11	spx9	0.484611	0.00229765
D11	12	spx9	0.48449	0.000415656
D11	13	spx9	0.487827	0.0019904
D11	14	spx9	0.485604	-0.00199386
D11	15	spx9	0.488834	-0.000525836
D11	16	spx9	0.488986	-0.00213523
D11	17	spx9	0.490206	-0.00267663
D11	18	spx9	0.496631	0.00198664
D11	19	spx9	0.498358	0.00195155
D11	20	spx9	0.510162	0.0119939
D11	21	spx9	0.529204	0.0292742
D11	22	spx9	0.566816	0.0651252
D11	23	spx9	0.631764	0.128311
D11	24	spx9	0.751723	0.246509
D11	25	spx9	0.950958	0.443982
D11	26	spx9	1.24152	0.732781
D11	27	spx9	1.53802	1.02752
D11	28	spx9	1.78436	1.27209
D11	29	spx9	1.96917	1.45515
D11	30	spx9	2.12403	1.60824
D11	31	spx9	2.24331	1.72576
D11	32	spx9	2.35765	1.83835
D11	33	spx9	2.43996	1.91889
D11	34	spx9	2.5079	1.98507
D11	35	spx9	2.56459	2.04
D11	36	spx9	2.62931	2.10296
D11	37	spx9	2.66159	2.13347
D11	38	spx9	2.70471	2.17483
D11	39	spx9	2.73529	2.20365
D11	40	spx9	2.75644	2.22303
D12	1	spx9	1.03103	-0.0216584
D12	2	spx9	1.03992	-0.0168087
D12	3	spx9	1.04609	-0.0146883
D12	4	spx9	1.06088	-0.00395131
D12	5	spx9	1.06801	-0.000862044
D12	6	spx9	1.07433	0.00141064
D12	7	spx9	1.07967	0.00270033
D12	8	spx9	1.08854	0.0075316
D12	9	spx9	1.09316	0.0081009
D12	10	spx9	1.09501	0.00590145
D12	11	spx9	1.09684	0.00368996
D12	12	spx9	1.09932	0.00211529
D12	13	spx9	1.10668	0.00543368
D12	14	spx9	1.1032	-0.00209395
D12	15	spx9	1.10907	-0.000272714
D12	16	spx9	1.10961	-0.00377417
D12	17	spx9	1.11327	-0.00416462
D12	18	spx9	1.1144	-0.0070767
D12	19	spx9	1.11698	-0.00854504
D12	20	spx9	1.13099	0.00142093
D12	21	spx9	1.14721	0.0135855
D12	22	spx9	1.18565	0.0479797
D12	23	spx9	1.25316	0.111445
D12	24	spx9	1.37747	0.23171
D12	25	spx9	1.57934	0.429529
D12	26	spx9	1.85578	0.701922
D12	27	spx9	2.12108	0.963182
D12	28	spx9	2.33519	1.17324
D12	29	spx9	2.50211	1.33612
D12	30	spx9	2.64339	1.47335
D12	31	spx9	2.75377	1.57969
D12	32	spx9	2.85103	1.67289
D12	33	spx9	2.92847	1.74629
D12	34	spx9	2.99259	1.80637
D12	35	spx9	3.04228	1.85201
D12	36	spx9	3.08869	1.89437
D12	37	spx9	3.1241	1.92573
D12	38	spx9	3.15243	1.95001
D12	39	spx9	3.18026	1.9738
D12	40	spx9	3.21871	2.0082
E1	1	spx6	0.40135	-0.0184605
E1	2	spx6	0.407726	-0.0141721
E1	3	spx6	0.414305	-0.00968131
E1	4	spx6	0.420763	-0.00531058
E1	5	spx6	0.424131	-0.00403059
E1	6	spx6	0.432296	0.00204706
E1	7	spx6	0.43274	0.000403473
E1	8	spx6	0.43466	0.000235814
E1	9	spx6	0.440848	0.00433603
E1	10	spx6	0.440157	0.00155706
E1	11	spx6	0.445682	0.00499443
E1	12	spx6	0.448975	0.00620027
E1	13	spx6	0.449322	0.00445965
E1	14	spx6	0.452453	0.00550253
E1	15	spx6	0.45043	0.00139232
E1	16	spx6	0.454145	0.0030201
E1	17	spx6	0.452455	-0.00075826
E1	18	spx6	0.455579	0.000278482
E1	19	spx6	0.457194	-0.000194205
E1	20	spx6	0.457661	-0.00181494
E1	21	spx6	0.458737	-0.00282678
E1	22	spx6	0.459491	-0.00416001
E1	23	spx6	0.464943	-0.000796269
E1	24	spx6	0.464114	-0.00371209
E1	25	spx6	0.468772	-0.0011422
E1	26	spx6	0.476003	0.00400083
E1	27	spx6	0.492397	0.0183077
E1	28	spx6	0.523325	0.047148
E1	29	spx6	0.581213	0.102949
E1	30	spx6	0.693775	0.213423
E1	31	spx6	0.867889	0.385449
E1	32	spx6	1.12805	0.643527
E1	33	spx6	1.36726	0.880648
E1	34	spx6	1.51151	1.02281
E1	35	spx6	1.66005	1.16926
E1	36	spx6	1.80357	1.31069
E1	37	spx6	1.93574	1.44077
E1	38	spx6	2.04529	1.54824
E1	39	spx6	2.14036	1.64122
E1	40	spx6	2.2097	1.70847
E2	1	spx6	0.330786	-0.00202288
E2	2	spx6	0.3303	-0.00293007
E2	3	spx6	0.330678	-0.00297323
E2	4	spx6	0.333192	-0.000880674
E2	5	spx6	0.335688	0.00119412
E2	6	spx6	0.334673	-0.000242119
E2	7	spx6	0.337335	0.00199871
E2	8	spx6	0.338345	0.00258718
E2	9	spx6	0.335492	-0.000686112
E2	10	spx6	0.334845	-0.00175471
E2	11	spx6	0.337963	0.000941493
E2	12	spx6	0.338438	0.000995276
E2	13	spx6	0.337976	0.000112433
E2	14	spx6	0.338699	0.000413844
E2	15	spx6	0.340578	0.00187185
E2	16	spx6	0.342114	0.00298639
E2	17	spx6	0.338836	-0.000712384
E2	18	spx6	0.340931	0.000961573
E2	19	spx6	0.338737	-0.00165401
E2	20	spx6	0.335513	-0.0052995
E2	21	spx6	0.338691	-0.00254243
E2	22	spx6	0.338347	-0.00330753
E2	23	spx6	0.341598	-0.000477599
E2	24	spx6	0.34328	0.000782941
E2	25	spx6	0.348603	0.00568449
E2	26	spx6	0.354266	0.0109268
E2	27	spx6	0.368556	0.024795
E2	28	spx6	0.397421	0.0532387
E2	29	spx6	0.448671	0.104068
E2	30	spx6	0.550702	0.205677
E2	31	spx6	0.721617	0.376171
E2	32	spx6	0.97366	0.627793
E2	33	spx6	1.22488	0.87859
[truncated: 1,847 more rows]

## Sheet: BioGroup Analysis Result
Block Type	96alum
Chemistry	SYBR_GREEN
Experiment File Name	D:\ShuJu\LZM\spx6-10zuzhichayibiaoda.eds
Experiment Run End Time	2023-07-14 07:20:09 AM CST
Instrument Type	sds7500
Passive Reference	ROX
Biogroup Name	Target Name	Task	RQ	RQ Min	RQ Max	Cт Mean	ΔCт Mean	ΔCт SE	ΔΔCт
Analysis Type	Singleplex
Endogenous Control	spx6
RQ Min/Max Confidence Level	95.0
Reference Biogroup Name

## Sheet: Technical Analysis Result
Block Type	96alum
Chemistry	SYBR_GREEN
Experiment File Name	D:\ShuJu\LZM\spx6-10zuzhichayibiaoda.eds
Experiment Run End Time	2023-07-14 07:20:09 AM CST
Instrument Type	sds7500
Passive Reference	ROX
Sample Name	Target Name	Task	RQ	RQ Min	RQ Max	Cт Mean	ΔCт Mean	ΔCт SE	ΔΔCт
root	spx7	UNKNOWN	1	0.64364	1.55366	25.4297	-0.0304623	0.228953	0
root	spx8	UNKNOWN	1	0.361332	2.76754	34.6309	9.17079	0.528951	0
root	spx9	UNKNOWN	1	0.645086	1.55018	25.534	0.0738989	0.227787	0
strem	spx7	UNKNOWN	19.2641	16.7326	22.1786	23.6313	-4.29831	0.0732055	-4.26784
strem	spx8	UNKNOWN	1.60788	0.511291	5.05639	36.4152	8.48563	0.519395	-0.685162
strem	spx9	UNKNOWN	41.3954	37.6546	45.5079	22.6321	-5.2975	0.0492158	-5.3714
leafe	spx7	UNKNOWN	2.03861	1.40013	2.96825	25.6098	-1.05805	0.195223	-1.02759
leafe	spx8	UNKNOWN	13.4656	9.53381	19.0189	32.0874	5.41959	0.179421	-3.75121
leafe	spx9	UNKNOWN	3.17928	2.43186	4.1564	25.073	-1.5948	0.139256	-1.6687
flower	spx7	UNKNOWN	5.07764	3.56458	7.23297	23.9989	-2.37462	0.183842	-2.34416
flower	spx8	UNKNOWN	22.6155	15.5335	32.9264	31.045	4.67155	0.19519	-4.49924
flower	spx9	UNKNOWN	6.18527	4.20508	9.09795	23.8186	-2.55494	0.20051	-2.62884
fruit	spx7	UNKNOWN	9.21771	7.79417	10.9012	26.295	-3.23487	0.0871661	-3.20441
fruit	spx8	UNKNOWN	3.59444	3.45063	3.74425	36.8549	7.32503	0.0185106	-1.84577
fruit	spx9	UNKNOWN	11.7081	10.7603	12.7393	26.0544	-3.47553	0.0438627	-3.54943
seed	spx7	UNKNOWN	102.2	42.6647	244.813	24.126	-6.70572	0.45392	-6.67525
seed	spx8	UNKNOWN	650	260.699	1620.64	30.6582	-0.173504	0.474727	-9.3443
seed	spx9	UNKNOWN	97.7816	40.437	236.448	24.2941	-6.53759	0.45882	-6.61149
root	spx10	UNKNOWN	1	0.655719	1.52504	27.1831	1.72292	0.219292	0
strem	spx10	UNKNOWN	20.25	18.2283	22.496	25.3127	-2.61693	0.0546544	-4.33985
leafe	spx10	UNKNOWN	25.1462	20.011	31.5992	23.7385	-2.92934	0.118694	-4.65227
flower	spx10	UNKNOWN	21.2856	13.309	34.0428	23.6846	-2.68888	0.244009	-4.4118
fruit	spx10	UNKNOWN	84.903	80.5867	89.4506	24.8451	-4.68482	0.027112	-6.40774
seed	spx10	UNKNOWN	121.512	47.4094	311.439	25.6297	-5.20203	0.489061	-6.92495
Analysis Type	Singleplex
Endogenous Control	spx6
RQ Min/Max Confidence Level	95.0
Reference Sample	root
