# Supplementary material for: Genome-wide identification and characterization of SPXdomain-containing genes family in eggplant
Source: PeerJ journal article supplement (doi:10.7717/peerj.17341), 2024-05-28
Supplement: 1-16_SPX_in_different_tissues.zip [file spx 11-15different tissues .xls]

## Sheet: Sample Setup
Block Type	96alum
Chemistry	SYBR_GREEN
Experiment File Name	D:\ShuJu\LZM\spx 11-15zuzhi teyi.eds
Experiment Run End Time	2023-07-14 09:22:46 AM CST
Instrument Type	sds7500
Passive Reference	ROX
Well	Sample Name	Sample Color	Biogroup Name	Biogroup Color	Target Name	Target Color	Task	Reporter	Quencher	Comments
A1	root	RGB(132,193,241)			spx11	RGB(139,189,249)	UNKNOWN	SYBR	None
A2	root	RGB(132,193,241)			spx11	RGB(139,189,249)	UNKNOWN	SYBR	None
A3	root	RGB(132,193,241)			spx11	RGB(139,189,249)	UNKNOWN	SYBR	None
A4	root	RGB(132,193,241)			spx12	RGB(208,243,98)	UNKNOWN	SYBR	None
A5	root	RGB(132,193,241)			spx12	RGB(208,243,98)	UNKNOWN	SYBR	None
A6	root	RGB(132,193,241)			spx12	RGB(208,243,98)	UNKNOWN	SYBR	None
A7	root	RGB(132,193,241)			spx13	RGB(244,165,230)	UNKNOWN	SYBR	None
A8	root	RGB(132,193,241)			spx13	RGB(244,165,230)	UNKNOWN	SYBR	None
A9	root	RGB(132,193,241)			spx13	RGB(244,165,230)	UNKNOWN	SYBR	None
A10	root	RGB(132,193,241)			spx14	RGB(255,191,168)	UNKNOWN	SYBR	None
A11	root	RGB(132,193,241)			spx14	RGB(255,191,168)	UNKNOWN	SYBR	None
A12	root	RGB(132,193,241)			spx14	RGB(255,191,168)	UNKNOWN	SYBR	None
B1	strem	RGB(168,255,222)			spx11	RGB(139,189,249)	UNKNOWN	SYBR	None
B2	strem	RGB(168,255,222)			spx11	RGB(139,189,249)	UNKNOWN	SYBR	None
B3	strem	RGB(168,255,222)			spx11	RGB(139,189,249)	UNKNOWN	SYBR	None
B4	strem	RGB(168,255,222)			spx12	RGB(208,243,98)	UNKNOWN	SYBR	None
B5	strem	RGB(168,255,222)			spx12	RGB(208,243,98)	UNKNOWN	SYBR	None
B6	strem	RGB(168,255,222)			spx12	RGB(208,243,98)	UNKNOWN	SYBR	None
B7	strem	RGB(168,255,222)			spx13	RGB(244,165,230)	UNKNOWN	SYBR	None
B8	strem	RGB(168,255,222)			spx13	RGB(244,165,230)	UNKNOWN	SYBR	None
B9	strem	RGB(168,255,222)			spx13	RGB(244,165,230)	UNKNOWN	SYBR	None
B10	strem	RGB(168,255,222)			spx14	RGB(255,191,168)	UNKNOWN	SYBR	None
B11	strem	RGB(168,255,222)			spx14	RGB(255,191,168)	UNKNOWN	SYBR	None
B12	strem	RGB(168,255,222)			spx14	RGB(255,191,168)	UNKNOWN	SYBR	None
C1	leafe	RGB(223,221,142)			spx11	RGB(139,189,249)	UNKNOWN	SYBR	None
C2	leafe	RGB(223,221,142)			spx11	RGB(139,189,249)	UNKNOWN	SYBR	None
C3	leafe	RGB(223,221,142)			spx11	RGB(139,189,249)	UNKNOWN	SYBR	None
C4	leafe	RGB(223,221,142)			spx12	RGB(208,243,98)	UNKNOWN	SYBR	None
C5	leafe	RGB(223,221,142)			spx12	RGB(208,243,98)	UNKNOWN	SYBR	None
C6	leafe	RGB(223,221,142)			spx12	RGB(208,243,98)	UNKNOWN	SYBR	None
C7	leafe	RGB(223,221,142)			spx13	RGB(244,165,230)	UNKNOWN	SYBR	None
C8	leafe	RGB(223,221,142)			spx13	RGB(244,165,230)	UNKNOWN	SYBR	None
C9	leafe	RGB(223,221,142)			spx13	RGB(244,165,230)	UNKNOWN	SYBR	None
C10	leafe	RGB(223,221,142)			spx14	RGB(255,191,168)	UNKNOWN	SYBR	None
C11	leafe	RGB(223,221,142)			spx14	RGB(255,191,168)	UNKNOWN	SYBR	None
C12	leafe	RGB(223,221,142)			spx14	RGB(255,191,168)	UNKNOWN	SYBR	None
D1	flower	RGB(247,255,168)			spx11	RGB(139,189,249)	UNKNOWN	SYBR	None
D2	flower	RGB(247,255,168)			spx11	RGB(139,189,249)	UNKNOWN	SYBR	None
D3	flower	RGB(247,255,168)			spx11	RGB(139,189,249)	UNKNOWN	SYBR	None
D4	flower	RGB(247,255,168)			spx12	RGB(208,243,98)	UNKNOWN	SYBR	None
D5	flower	RGB(247,255,168)			spx12	RGB(208,243,98)	UNKNOWN	SYBR	None
D6	flower	RGB(247,255,168)			spx12	RGB(208,243,98)	UNKNOWN	SYBR	None
D7	flower	RGB(247,255,168)			spx13	RGB(244,165,230)	UNKNOWN	SYBR	None
D8	flower	RGB(247,255,168)			spx13	RGB(244,165,230)	UNKNOWN	SYBR	None
D9	flower	RGB(247,255,168)			spx13	RGB(244,165,230)	UNKNOWN	SYBR	None
D10	flower	RGB(247,255,168)			spx14	RGB(255,191,168)	UNKNOWN	SYBR	None
D11	flower	RGB(247,255,168)			spx14	RGB(255,191,168)	UNKNOWN	SYBR	None
D12	flower	RGB(247,255,168)			spx14	RGB(255,191,168)	UNKNOWN	SYBR	None
E1	fruit	RGB(180,255,0)			spx11	RGB(139,189,249)	UNKNOWN	SYBR	None
E2	fruit	RGB(180,255,0)			spx11	RGB(139,189,249)	UNKNOWN	SYBR	None
E3	fruit	RGB(180,255,0)			spx11	RGB(139,189,249)	UNKNOWN	SYBR	None
E4	fruit	RGB(180,255,0)			spx12	RGB(208,243,98)	UNKNOWN	SYBR	None
E5	fruit	RGB(180,255,0)			spx12	RGB(208,243,98)	UNKNOWN	SYBR	None
E6	fruit	RGB(180,255,0)			spx12	RGB(208,243,98)	UNKNOWN	SYBR	None
E7	fruit	RGB(180,255,0)			spx13	RGB(244,165,230)	UNKNOWN	SYBR	None
E8	fruit	RGB(180,255,0)			spx13	RGB(244,165,230)	UNKNOWN	SYBR	None
E9	fruit	RGB(180,255,0)			spx13	RGB(244,165,230)	UNKNOWN	SYBR	None
E10	fruit	RGB(180,255,0)			spx14	RGB(255,191,168)	UNKNOWN	SYBR	None
E11	fruit	RGB(180,255,0)			spx14	RGB(255,191,168)	UNKNOWN	SYBR	None
E12	fruit	RGB(180,255,0)			spx14	RGB(255,191,168)	UNKNOWN	SYBR	None
F1	seed	RGB(255,204,153)			spx11	RGB(139,189,249)	UNKNOWN	SYBR	None
F2	seed	RGB(255,204,153)			spx11	RGB(139,189,249)	UNKNOWN	SYBR	None
F3	seed	RGB(255,204,153)			spx11	RGB(139,189,249)	UNKNOWN	SYBR	None
F4	seed	RGB(255,204,153)			spx12	RGB(208,243,98)	UNKNOWN	SYBR	None
F5	seed	RGB(255,204,153)			spx12	RGB(208,243,98)	UNKNOWN	SYBR	None
F6	seed	RGB(255,204,153)			spx12	RGB(208,243,98)	UNKNOWN	SYBR	None
F7	seed	RGB(255,204,153)			spx13	RGB(244,165,230)	UNKNOWN	SYBR	None
F8	seed	RGB(255,204,153)			spx13	RGB(244,165,230)	UNKNOWN	SYBR	None
F9	seed	RGB(255,204,153)			spx13	RGB(244,165,230)	UNKNOWN	SYBR	None
F10	seed	RGB(255,204,153)			spx14	RGB(255,191,168)	UNKNOWN	SYBR	None
F11	seed	RGB(255,204,153)			spx14	RGB(255,191,168)	UNKNOWN	SYBR	None
F12	seed	RGB(255,204,153)			spx14	RGB(255,191,168)	UNKNOWN	SYBR	None
G1	root	RGB(132,193,241)			spx15	RGB(243,124,98)	UNKNOWN	SYBR	None
G2	root	RGB(132,193,241)			spx15	RGB(243,124,98)	UNKNOWN	SYBR	None
G3	root	RGB(132,193,241)			spx15	RGB(243,124,98)	UNKNOWN	SYBR	None
G4	strem	RGB(168,255,222)			spx15	RGB(243,124,98)	UNKNOWN	SYBR	None
G5	strem	RGB(168,255,222)			spx15	RGB(243,124,98)	UNKNOWN	SYBR	None
G6	strem	RGB(168,255,222)			spx15	RGB(243,124,98)	UNKNOWN	SYBR	None
G7	leafe	RGB(223,221,142)			spx15	RGB(243,124,98)	UNKNOWN	SYBR	None
G8	leafe	RGB(223,221,142)			spx15	RGB(243,124,98)	UNKNOWN	SYBR	None
G9	leafe	RGB(223,221,142)			spx15	RGB(243,124,98)	UNKNOWN	SYBR	None
G10	flower	RGB(247,255,168)			spx15	RGB(243,124,98)	UNKNOWN	SYBR	None
G11	flower	RGB(247,255,168)			spx15	RGB(243,124,98)	UNKNOWN	SYBR	None
G12	flower	RGB(247,255,168)			spx15	RGB(243,124,98)	UNKNOWN	SYBR	None
H1	fruit	RGB(180,255,0)			spx15	RGB(243,124,98)	UNKNOWN	SYBR	None
H2	fruit	RGB(180,255,0)			spx15	RGB(243,124,98)	UNKNOWN	SYBR	None
H3	fruit	RGB(180,255,0)			spx15	RGB(243,124,98)	UNKNOWN	SYBR	None
H4	seed	RGB(255,204,153)			spx15	RGB(243,124,98)	UNKNOWN	SYBR	None
H5	seed	RGB(255,204,153)			spx15	RGB(243,124,98)	UNKNOWN	SYBR	None
H6	seed	RGB(255,204,153)			spx15	RGB(243,124,98)	UNKNOWN	SYBR	None
H7
H8
H9
H10
H11
H12

## Sheet: Results
Block Type	96alum
Chemistry	SYBR_GREEN
Experiment File Name	D:\ShuJu\LZM\spx 11-15zuzhi teyi.eds
Experiment Run End Time	2023-07-14 09:22:46 AM CST
Instrument Type	sds7500
Passive Reference	ROX
Well	Sample Name	Target Name	Task	Reporter	Quencher	RQ	RQ Min	RQ Max	Cт	Cт Mean	Cт SD	ΔCт	ΔCт Mean	ΔCт SE	HK Control ΔCт Mean	HK Control ΔCт SE	ΔΔCт	Automatic Ct Threshold	Ct Threshold	Automatic Baseline	Baseline Start	Baseline End	Efficiency	Tm1	Tm2	Tm3	Comments	HIGHSD	OUTLIERRG
A1	root	spx11	UNKNOWN	SYBR	None				31.031	30.8522	0.382911							TRUE	0.101504	TRUE	3	26	1	78.9492				N	N
A2	root	spx11	UNKNOWN	SYBR	None				30.4126	30.8522	0.382911							TRUE	0.101504	TRUE	3	26	1	78.9492				N	N
A3	root	spx11	UNKNOWN	SYBR	None				31.113	30.8522	0.382911							TRUE	0.101504	TRUE	3	26	1	79.1395				N	N
A4	root	spx12	UNKNOWN	SYBR	None	1	0.651806	1.5342	22.433	22.4188	0.0420296		-8.43342	0.222402			0	TRUE	0.279113	TRUE	3	17	1	78.1876				N	N
A5	root	spx12	UNKNOWN	SYBR	None	1	0.651806	1.5342	22.3715	22.4188	0.0420296		-8.43342	0.222402			0	TRUE	0.279113	TRUE	3	16	1	78.1876				N	N
A6	root	spx12	UNKNOWN	SYBR	None	1	0.651806	1.5342	22.4518	22.4188	0.0420296		-8.43342	0.222402			0	TRUE	0.279113	TRUE	3	17	1	78.1876				N	N
A7	root	spx13	UNKNOWN	SYBR	None	1	0.648265	1.54258	28.1612	28.169	0.074615		-2.68316	0.225232			0	TRUE	0.18673	TRUE	3	23	1	78.378				N	N
A8	root	spx13	UNKNOWN	SYBR	None	1	0.648265	1.54258	28.2472	28.169	0.074615		-2.68316	0.225232			0	TRUE	0.18673	TRUE	3	23	1	78.378				N	N
A9	root	spx13	UNKNOWN	SYBR	None	1	0.648265	1.54258	28.0986	28.169	0.074615		-2.68316	0.225232			0	TRUE	0.18673	TRUE	3	23	1	78.1876				N	N
A10	root	spx14	UNKNOWN	SYBR	None	1	0.41915	2.38578	30.5478	30.0245	0.682503		-0.827726	0.451823			0	TRUE	0.0533542	TRUE	3	27	1	78.1876				Y	N
A11	root	spx14	UNKNOWN	SYBR	None	1	0.41915	2.38578	29.2525	30.0245	0.682503		-0.827726	0.451823			0	TRUE	0.0533542	TRUE	3	27	1	78.1876				Y	N
A12	root	spx14	UNKNOWN	SYBR	None	1	0.41915	2.38578	30.273	30.0245	0.682503		-0.827726	0.451823			0	TRUE	0.0533542	TRUE	3	27	1	77.9972				Y	N
B1	strem	spx11	UNKNOWN	SYBR	None				25.772	25.6438	0.113447							TRUE	0.101504	TRUE	3	22	1	78.9492				N	N
B2	strem	spx11	UNKNOWN	SYBR	None				25.6029	25.6438	0.113447							TRUE	0.101504	TRUE	3	21	1	79.1395				N	N
B3	strem	spx11	UNKNOWN	SYBR	None				25.5565	25.6438	0.113447							TRUE	0.101504	TRUE	3	21	1	79.1395				N	N
B4	strem	spx12	UNKNOWN	SYBR	None	0.00174619	0.00131277	0.00232271	26.3169	26.372	0.23035		0.728148	0.148247			9.16157	TRUE	0.279113	TRUE	3	21	1	78.378				N	N
B5	strem	spx12	UNKNOWN	SYBR	None	0.00174619	0.00131277	0.00232271	26.6249	26.372	0.23035		0.728148	0.148247			9.16157	TRUE	0.279113	TRUE	3	21	1	78.378				N	N
B6	strem	spx12	UNKNOWN	SYBR	None	0.00174619	0.00131277	0.00232271	26.1741	26.372	0.23035		0.728148	0.148247			9.16157	TRUE	0.279113	TRUE	3	21	1	78.378				N	N
B7	strem	spx13	UNKNOWN	SYBR	None	0.498402	0.425103	0.584339	23.981	23.9653	0.0873324		-1.67854	0.0826581			1.00462	TRUE	0.18673	TRUE	3	19	1	78.5684				N	N
B8	strem	spx13	UNKNOWN	SYBR	None	0.498402	0.425103	0.584339	24.0437	23.9653	0.0873324		-1.67854	0.0826581			1.00462	TRUE	0.18673	TRUE	3	19	1	78.5684				N	N
B9	strem	spx13	UNKNOWN	SYBR	None	0.498402	0.425103	0.584339	23.8712	23.9653	0.0873324		-1.67854	0.0826581			1.00462	TRUE	0.18673	TRUE	3	19	1	78.5684				N	N
B10	strem	spx14	UNKNOWN	SYBR	None	0.0155742	0.00754289	0.0321567	30.3105	30.8208	0.642575		5.17698	0.376728			6.0047	TRUE	0.0533542	TRUE	3	27	1	78.5684				Y	N
B11	strem	spx14	UNKNOWN	SYBR	None	0.0155742	0.00754289	0.0321567	31.5424	30.8208	0.642575		5.17698	0.376728			6.0047	TRUE	0.0533542	TRUE	3	29	1	78.378				Y	N
B12	strem	spx14	UNKNOWN	SYBR	None	0.0155742	0.00754289	0.0321567	30.6095	30.8208	0.642575		5.17698	0.376728			6.0047	TRUE	0.0533542	TRUE	3	27	1	78.1876				Y	N
C1	leafe	spx11	UNKNOWN	SYBR	None				27.075	26.9011	0.299252							TRUE	0.101504	TRUE	3	23	1	79.1395				N	N
C2	leafe	spx11	UNKNOWN	SYBR	None				27.0727	26.9011	0.299252							TRUE	0.101504	TRUE	3	23	1	79.3299				N	N
C3	leafe	spx11	UNKNOWN	SYBR	None				26.5556	26.9011	0.299252							TRUE	0.101504	TRUE	3	22	1	79.3299				N	Y
C4	leafe	spx12	UNKNOWN	SYBR	None	0.000112792	7.91149e-05	0.000160804	31.7093	31.5817	0.111018		4.68062	0.184279			13.114	TRUE	0.279113	TRUE	3	26	1	78.5684				N	N
C5	leafe	spx12	UNKNOWN	SYBR	None	0.000112792	7.91149e-05	0.000160804	31.5292	31.5817	0.111018		4.68062	0.184279			13.114	TRUE	0.279113	TRUE	3	25	1	78.5684				N	N
C6	leafe	spx12	UNKNOWN	SYBR	None	0.000112792	7.91149e-05	0.000160804	31.5067	31.5817	0.111018		4.68062	0.184279			13.114	TRUE	0.279113	TRUE	3	26	1	78.5684				N	N
C7	leafe	spx13	UNKNOWN	SYBR	None	0.0811806	0.0564988	0.116645	27.7145	27.8407	0.129861		0.939563	0.18834			3.62272	TRUE	0.18673	TRUE	3	23	1	78.7588				N	N
C8	leafe	spx13	UNKNOWN	SYBR	None	0.0811806	0.0564988	0.116645	27.9739	27.8407	0.129861		0.939563	0.18834			3.62272	TRUE	0.18673	TRUE	3	23	1	78.7588				N	N
C9	leafe	spx13	UNKNOWN	SYBR	None	0.0811806	0.0564988	0.116645	27.8337	27.8407	0.129861		0.939563	0.18834			3.62272	TRUE	0.18673	TRUE	3	23	1	78.7588				N	N
C10	leafe	spx14	UNKNOWN	SYBR	None	0.0313556	0.0202814	0.0484766	30.7937	31.0685	0.253394		4.1674	0.226392			4.99513	TRUE	0.0533542	TRUE	3	28	1	78.5684				N	N
C11	leafe	spx14	UNKNOWN	SYBR	None	0.0313556	0.0202814	0.0484766	31.119	31.0685	0.253394		4.1674	0.226392			4.99513	TRUE	0.0533542	TRUE	3	28	1	78.378				N	N
C12	leafe	spx14	UNKNOWN	SYBR	None	0.0313556	0.0202814	0.0484766	31.2929	31.0685	0.253394		4.1674	0.226392			4.99513	TRUE	0.0533542	TRUE	3	28	1	78.1876				N	N
D1	flower	spx11	UNKNOWN	SYBR	None				24.5944	24.7086	0.19921							TRUE	0.101504	TRUE	3	20	1	79.3299				N	N
D2	flower	spx11	UNKNOWN	SYBR	None				24.5928	24.7086	0.19921							TRUE	0.101504	TRUE	3	20	1	79.3299				N	N
D3	flower	spx11	UNKNOWN	SYBR	None				24.9387	24.7086	0.19921							TRUE	0.101504	TRUE	3	21	1	79.5203				N	N
D4	flower	spx12	UNKNOWN	SYBR	None	0.00067597	0.000523776	0.000872386	26.9354	26.806	0.11411		2.09733	0.132546			10.5308	TRUE	0.279113	TRUE	3	21	1	78.5684				N	N
D5	flower	spx12	UNKNOWN	SYBR	None	0.00067597	0.000523776	0.000872386	26.7199	26.806	0.11411		2.09733	0.132546			10.5308	TRUE	0.279113	TRUE	3	21	1	78.5684				N	N
D6	flower	spx12	UNKNOWN	SYBR	None	0.00067597	0.000523776	0.000872386	26.7625	26.806	0.11411		2.09733	0.132546			10.5308	TRUE	0.279113	TRUE	3	21	1	78.5684				N	N
D7	flower	spx13	UNKNOWN	SYBR	None	0.0731386	0.0567807	0.0942091	25.6768	25.7987	0.110586		1.09007	0.131547			3.77322	TRUE	0.18673	TRUE	3	21	1	78.9492				N	N
D8	flower	spx13	UNKNOWN	SYBR	None	0.0731386	0.0567807	0.0942091	25.8266	25.7987	0.110586		1.09007	0.131547			3.77322	TRUE	0.18673	TRUE	3	21	1	78.9492				N	N
D9	flower	spx13	UNKNOWN	SYBR	None	0.0731386	0.0567807	0.0942091	25.8927	25.7987	0.110586		1.09007	0.131547			3.77322	TRUE	0.18673	TRUE	3	21	1	78.1876				N	N
D10	flower	spx14	UNKNOWN	SYBR	None	0.00802266	0.00265158	0.0242735	29.8143	30.8426	0.976295		6.13398	0.575279			6.9617	TRUE	0.0533542	TRUE	3	27	1	78.7588				Y	N
D11	flower	spx14	UNKNOWN	SYBR	None	0.00802266	0.00265158	0.0242735	30.9567	30.8426	0.976295		6.13398	0.575279			6.9617	TRUE	0.0533542	TRUE	3	28	1	78.5684				Y	N
D12	flower	spx14	UNKNOWN	SYBR	None	0.00802266	0.00265158	0.0242735	31.7568	30.8426	0.976295		6.13398	0.575279			6.9617	TRUE	0.0533542	TRUE	3	28	1	78.1876				Y	N
E1	fruit	spx11	UNKNOWN	SYBR	None				27.3307	27.2418	0.0926566							TRUE	0.101504	TRUE	3	23	1	79.3299				N	N
E2	fruit	spx11	UNKNOWN	SYBR	None				27.1458	27.2418	0.0926566							TRUE	0.101504	TRUE	3	23	1	79.3299				N	N
E3	fruit	spx11	UNKNOWN	SYBR	None				27.2488	27.2418	0.0926566							TRUE	0.101504	TRUE	3	23	1	79.5203				N	N
E4	fruit	spx12	UNKNOWN	SYBR	None	0.00104356	0.000798514	0.00136381	28.5117	28.7126	0.222347		1.47084	0.139072			9.90427	TRUE	0.279113	TRUE	3	23	1	78.5684				N	N
E5	fruit	spx12	UNKNOWN	SYBR	None	0.00104356	0.000798514	0.00136381	28.6747	28.7126	0.222347		1.47084	0.139072			9.90427	TRUE	0.279113	TRUE	3	23	1	78.5684				N	N
E6	fruit	spx12	UNKNOWN	SYBR	None	0.00104356	0.000798514	0.00136381	28.9515	28.7126	0.222347		1.47084	0.139072			9.90427	TRUE	0.279113	TRUE	3	23	1	78.5684				N	N
E7	fruit	spx13	UNKNOWN	SYBR	None	0.118229	0.0948296	0.147401	27.4849	27.639	0.175532		0.397191	0.114596			3.08035	TRUE	0.18673	TRUE	3	22	1	78.9492				N	N
E8	fruit	spx13	UNKNOWN	SYBR	None	0.118229	0.0948296	0.147401	27.602	27.639	0.175532		0.397191	0.114596			3.08035	TRUE	0.18673	TRUE	3	23	1	78.7588				N	N
E9	fruit	spx13	UNKNOWN	SYBR	None	0.118229	0.0948296	0.147401	27.8301	27.639	0.175532		0.397191	0.114596			3.08035	TRUE	0.18673	TRUE	3	23	1	78.7588				N	N
E10	fruit	spx14	UNKNOWN	SYBR	None	0.00628684	0.00290607	0.0136006	33.2937	33.7275	0.688289		6.48572	0.400969			7.31345	TRUE	0.0533542	TRUE	3	30	1	78.7588				Y	N
E11	fruit	spx14	UNKNOWN	SYBR	None	0.00628684	0.00290607	0.0136006	33.3678	33.7275	0.688289		6.48572	0.400969			7.31345	TRUE	0.0533542	TRUE	3	30	1	78.5684				Y	N
E12	fruit	spx14	UNKNOWN	SYBR	None	0.00628684	0.00290607	0.0136006	34.5211	33.7275	0.688289		6.48572	0.400969			7.31345	TRUE	0.0533542	TRUE	3	31	1	78.378				Y	N
F1	seed	spx11	UNKNOWN	SYBR	None				24.2354	24.3052	0.292464							TRUE	0.101504	TRUE	3	20	1	79.1395				N	N
F2	seed	spx11	UNKNOWN	SYBR	None				24.6263	24.3052	0.292464							TRUE	0.101504	TRUE	3	20	1	79.3299				N	N
F3	seed	spx11	UNKNOWN	SYBR	None				24.054	24.3052	0.292464							TRUE	0.101504	TRUE	3	20	1	79.3299				N	N
F4	seed	spx12	UNKNOWN	SYBR	None	3.63097e-05	2.46459e-05	5.34935e-05	30.4265	30.6211	0.189941		6.31586	0.20134			14.7493	TRUE	0.279113	TRUE	3	25	1	78.5684				N	N
F5	seed	spx12	UNKNOWN	SYBR	None	3.63097e-05	2.46459e-05	5.34935e-05	30.806	30.6211	0.189941		6.31586	0.20134			14.7493	TRUE	0.279113	TRUE	3	25	1	78.5684				N	N
F6	seed	spx12	UNKNOWN	SYBR	None	3.63097e-05	2.46459e-05	5.34935e-05	30.6308	30.6211	0.189941		6.31586	0.20134			14.7493	TRUE	0.279113	TRUE	3	25	1	78.5684				N	N
F7	seed	spx13	UNKNOWN	SYBR	None	0.154934	0.0371269	0.646554	25.1882	24.3123	1.2521		0.00711568	0.742358			2.69027	TRUE	0.18673	TRUE	3	21	1	78.1876				Y	N
F8	seed	spx13	UNKNOWN	SYBR	None	0.154934	0.0371269	0.646554	24.8706	24.3123	1.2521		0.00711568	0.742358			2.69027	TRUE	0.18673	TRUE	3	20	1	78.7588				Y	N
F9	seed	spx13	UNKNOWN	SYBR	None	0.154934	0.0371269	0.646554	22.8782	24.3123	1.2521		0.00711568	0.742358			2.69027	TRUE	0.18673	TRUE	3	19	1	78.5684				Y	N
F10	seed	spx14	UNKNOWN	SYBR	None	0.00337083	0.000878298	0.012937	31.2674	31.6902	1.17458		7.38495	0.698851			8.21268	TRUE	0.0533542	TRUE	3	28	1	78.5684				Y	N
F11	seed	spx14	UNKNOWN	SYBR	None	0.00337083	0.000878298	0.012937	30.7855	31.6902	1.17458		7.38495	0.698851			8.21268	TRUE	0.0533542	TRUE	3	28	1	78.378				Y	N
F12	seed	spx14	UNKNOWN	SYBR	None	0.00337083	0.000878298	0.012937	33.0176	31.6902	1.17458		7.38495	0.698851			8.21268	TRUE	0.0533542	TRUE	3	29	1	78.1876				Y	N
G1	root	spx15	UNKNOWN	SYBR	None	1	0.649904	1.53869	23.9246	23.8535	0.0616422		-6.99873	0.22392			0	TRUE	0.191168	TRUE	3	19	1	81.0435				N	N
G2	root	spx15	UNKNOWN	SYBR	None	1	0.649904	1.53869	23.8182	23.8535	0.0616422		-6.99873	0.22392			0	TRUE	0.191168	TRUE	3	18	1	81.2339				N	N
G3	root	spx15	UNKNOWN	SYBR	None	1	0.649904	1.53869	23.8175	23.8535	0.0616422		-6.99873	0.22392			0	TRUE	0.191168	TRUE	3	19	1	81.2339				N	N
G4	strem	spx15	UNKNOWN	SYBR	None	0.00298702	0.00258166	0.00345603	27.082	27.0322	0.0660243		1.38835	0.0757834			8.38708	TRUE	0.191168	TRUE	3	23	1	81.4243				N	N
G5	strem	spx15	UNKNOWN	SYBR	None	0.00298702	0.00258166	0.00345603	27.0573	27.0322	0.0660243		1.38835	0.0757834			8.38708	TRUE	0.191168	TRUE	3	22	1	81.4243				N	N
G6	strem	spx15	UNKNOWN	SYBR	None	0.00298702	0.00258166	0.00345603	26.9573	27.0322	0.0660243		1.38835	0.0757834			8.38708	TRUE	0.191168	TRUE	3	22	1	81.4243				N	N
G7	leafe	spx15	UNKNOWN	SYBR	None	0.00412757	0.0029387	0.0057974	27.7965	27.8229	0.0627101		0.921759	0.176526			7.92049	TRUE	0.191168	TRUE	3	23	1	81.4243				N	N
G8	leafe	spx15	UNKNOWN	SYBR	None	0.00412757	0.0029387	0.0057974	27.8945	27.8229	0.0627101		0.921759	0.176526			7.92049	TRUE	0.191168	TRUE	3	23	1	81.4243				N	N
G9	leafe	spx15	UNKNOWN	SYBR	None	0.00412757	0.0029387	0.0057974	27.7776	27.8229	0.0627101		0.921759	0.176526			7.92049	TRUE	0.191168	TRUE	3	23	1	81.2339				N	N
G10	flower	spx15	UNKNOWN	SYBR	None	0.00118456	0.000948054	0.00148007	27.4154	27.4313	0.0222203		2.7227	0.115727			9.72143	TRUE	0.191168	TRUE	3	23	1	81.2339				N	N
G11	flower	spx15	UNKNOWN	SYBR	None	0.00118456	0.000948054	0.00148007	27.4567	27.4313	0.0222203		2.7227	0.115727			9.72143	TRUE	0.191168	TRUE	3	22	1	81.0435				N	N
G12	flower	spx15	UNKNOWN	SYBR	None	0.00118456	0.000948054	0.00148007	27.4219	27.4313	0.0222203		2.7227	0.115727			9.72143	TRUE	0.191168	TRUE	3	22	1	80.8531				N	N
H1	fruit	spx15	UNKNOWN	SYBR	None	0.00161107	0.00137683	0.00188518	29.5261	29.5208	0.106824		2.27903	0.0816425			9.27776	TRUE	0.191168	TRUE	3	24	1	80.8531				N	N
H2	fruit	spx15	UNKNOWN	SYBR	None	0.00161107	0.00137683	0.00188518	29.6249	29.5208	0.106824		2.27903	0.0816425			9.27776	TRUE	0.191168	TRUE	3	25	1	81.0435				N	N
H3	fruit	spx15	UNKNOWN	SYBR	None	0.00161107	0.00137683	0.00188518	29.4115	29.5208	0.106824		2.27903	0.0816425			9.27776	TRUE	0.191168	TRUE	3	24	1	81.0435				N	N
H4	seed	spx15	UNKNOWN	SYBR	None	0.000678662	0.000483324	0.000952947	27.8263	27.8315	0.0882693		3.52629	0.176377			10.525	TRUE	0.191168	TRUE	3	23	1	81.2339				N	N
H5	seed	spx15	UNKNOWN	SYBR	None	0.000678662	0.000483324	0.000952947	27.9223	27.8315	0.0882693		3.52629	0.176377			10.525	TRUE	0.191168	TRUE	3	23	1	81.2339				N	N
H6	seed	spx15	UNKNOWN	SYBR	None	0.000678662	0.000483324	0.000952947	27.746	27.8315	0.0882693		3.52629	0.176377			10.525	TRUE	0.191168	TRUE	3	23	1	81.2339				N	N
Analysis Type	Singleplex
Endogenous Control	spx11
RQ Min/Max Confidence Level	95.0
Reference Sample	root

## Sheet: Raw Data
Block Type	96alum
Chemistry	SYBR_GREEN
Experiment File Name	D:\ShuJu\LZM\spx 11-15zuzhi teyi.eds
Experiment Run End Time	2023-07-14 09:22:46 AM CST
Instrument Type	sds7500
Passive Reference	ROX
Well	Cycle	1	2	3	4	5
A1	1	18942.9	3491.4	13087.6	93821	3099.4
A2	1	32157.5	4550.43	18344.1	122907	3018.44
A3	1	31151.7	4554.53	20505.7	126311	2625.67
A4	1	33046	4763.69	20665.9	119955	3010.09
A5	1	32782.2	5042.2	21473.6	123448	3560.67
A6	1	45506.9	7915.36	26459.4	142407	5361.93
A7	1	34300.8	5948.26	22904.1	127181	4138.09
A8	1	183213	29352.8	79263.1	417231	19500
A9	1	40765	5649.95	22678.7	131048	3456.32
A10	1	31271.2	5605.12	21500.3	132600	4008.49
A11	1	31589.6	4882.67	20789.5	138213	3010.66
A12	1	39622.2	5990.61	19785.5	139652	3836.21
B1	1	34535.6	5411.61	18276.1	124109	3457.86
B2	1	38680.8	6230.4	21083.6	130199	3970.7
B3	1	32598.8	6194.24	22589.4	127771	3512.77
B4	1	30175.8	4740.3	22131	124286	3433.59
B5	1	33649.7	5356	26010	148445	4358.71
B6	1	27312.9	4433.03	23706.4	128152	3166
B7	1	28958.7	4755.37	23703.4	126843	3400.56
B8	1	108901	17262.4	75449.9	413955	11423.2
B9	1	36625.1	6208.98	23853	130437	3888.57
B10	1	40218.4	6393.95	23459.6	134615	3694.43
B11	1	45572.9	6993.71	23864.6	144724	4832.38
B12	1	43674.9	7746.72	22594.9	148171	5613.97
C1	1	36272.7	5809.99	20358.6	131630	3126.66
C2	1	42645.4	6957.04	29118.9	181043	5106.91
C3	1	37249.1	5017.84	23331.8	133127	3070.07
C4	1	30969.2	5001.28	22534.6	120809	2898.1
C5	1	31815.4	5012.1	24672.2	127909	3990.13
C6	1	30196.2	4933.15	25068.6	127717	2671.57
C7	1	30509.5	5190.1	24777.9	125483	2707.73
C8	1	35880.6	6030.35	25466.3	130017	3628.5
C9	1	42716.7	8192.99	25760.6	129955	4599.59
C10	1	37557.6	6810.6	24480.7	134390	4320.07
C11	1	34612.8	6072.23	22980.4	137574	2996.29
C12	1	41561.4	6532.73	22777.7	147026	3213.73
D1	1	40973.4	6494.82	21468	134553	3268.14
D2	1	36221.1	5759.75	23118.8	136262	2931.58
D3	1	44365.3	7585.08	26383.2	138394	5153.99
D4	1	34551.4	6271.44	25124.8	128292	5054.42
D5	1	36122.1	5577.37	25495.6	128536	2779.08
D6	1	38580.9	6824.17	25807.6	124297	4285.25
D7	1	27980.4	4614.31	24173.3	120229	2849.85
D8	1	28401	6247.22	24043.9	118293	2323.42
D9	1	33586.9	5636.64	23168	122660	3508.44
D10	1	47397.3	8189.65	25651.2	133141	4981.19
D11	1	47286.4	7869.39	25057.6	140037	4243.22
D12	1	123075	15811.1	27290.3	145974	6276.23
E1	1	42638.3	9071.72	22428.1	131720	5390.09
E2	1	41960	6785.54	22223.6	126030	3476.05
E3	1	68241.8	8888.46	26354.1	135728	6584
E4	1	34444.8	5991.62	25319.2	130980	3635.97
E5	1	29456.5	4939.67	24101	122420	2866.25
E6	1	145572	23498	35481.4	139763	13850
E7	1	45359.2	7991.97	25934.6	121570	7860.38
E8	1	33606.4	6403.02	26005.7	126607	3870.47
E9	1	33259.1	7229.33	26523.1	123754	3612.18
E10	1	37728.1	6431.3	23310.4	123675	4533.65
E11	1	36447.2	6377.31	22242.9	126117	5172
E12	1	48266	7956.34	22839.7	138086	4981.64
F1	1	44778.2	13796.3	25952	143422	7675.63
F2	1	41236.8	6549.68	23037.3	135104	3253.82
F3	1	33697	5312.45	25480.3	143271	2830.89
F4	1	33625.4	5548.83	25341.3	133735	3403.81
F5	1	29069.2	4686.06	24904.2	129874	2632.8
F6	1	52264.5	9772.2	28192.2	130212	6834.72
F7	1	28028.8	4602.58	25286	129765	3608.62
F8	1	31791.1	5302.96	25288.2	128277	2748.73
F9	1	33067.7	5512.56	18916.7	96759.5	4230.13
F10	1	35465.8	5851.77	24141.7	134208	4493.76
F11	1	30611.9	4764.84	20451.6	121847	2779.91
F12	1	52268.3	9377.47	22882.1	134026	5404.3
G1	1	38514.8	9210.14	22453	142873	3898.65
G2	1	51204.3	8178.36	24933	148401	3628.63
G3	1	37825	9924.15	26295.9	143024	3196.96
G4	1	38395.8	7366.14	25395.7	140821	3115.96
G5	1	30509.6	4832.27	25690.9	140237	3060.74
G6	1	30963.4	5399.44	25098.1	132728	2922.91
G7	1	29722.8	5236	25384.4	135796	3563.36
G8	1	37249.6	8728.59	28167.9	143693	4380.19
G9	1	38673.3	6273.18	24760.4	135723	3150.99
G10	1	50242.6	8876.57	25762.9	142325	4234.46
G11	1	67301.9	11171.5	25880.7	143519	6998.82
G12	1	41880.3	6578.57	23181	153502	3370.71
H1	1	55890.5	14084.8	25799.6	156777	11009.4
H2	1	41743.8	7199.59	24818.4	158823	4124.54
H3	1	36666.7	6766.12	24713.1	146227	5019.16
H4	1	34381	6224.44	25388.2	144785	2922.32
H5	1	34168.1	6116.6	26512.5	148084	3273.61
H6	1	41673	7247.88	27888.2	153599	4138.9
H7	1	30719.8	6790.44	4148.83	5309.48	3211.53
H8	1	34771.3	5897.87	3942.8	6582.12	3702.46
H9	1	34967.8	5282.94	3552.85	6037.33	3143.83
H10	1	46685.7	10485.1	8184.87	10805	6782.58
H11	1	39502.6	6436.72	4182.2	6092.42	3478.51
H12	1	43729.7	5585.89	3436.59	5671.47	3408.5
A1	2	18974.8	3514.84	13034.2	93786.9	2449.24
A2	2	32573.6	4919.65	18429.9	121816	2892.5
A3	2	31151.7	4783.32	20415.5	125616	2619.42
A4	2	33436.4	5209.64	20575.8	119707	2927.73
A5	2	33231	5290.29	21823.8	123057	3361.27
A6	2	46521.8	8313.47	26723.7	142578	5571.17
A7	2	35083.7	5638.28	23367.2	127687	4231.62
A8	2	185454	29313	80017.9	416718	20266.2
A9	2	41096.7	5913.33	22812	130951	3291.17
A10	2	31664.6	5358.61	21680.5	131866	4004.07
A11	2	31666.9	5047.9	20456.3	136942	3254.58
A12	2	40005.3	6313.5	19834.2	139738	4059.44
B1	2	33901.5	5854.27	18350.8	123471	3955.22
B2	2	38675.9	6327.06	20964.7	128809	3773.92
B3	2	32530.4	6448.5	22415.2	126428	3282.68
B4	2	30500	4894.39	22097.7	123350	3572.71
B5	2	33884.1	5273.04	25801.6	147368	4344.23
B6	2	27160.5	4377.92	23528.3	127115	2892.19
B7	2	29240.2	4841.91	23706.1	126412	3393.46
B8	2	109516	17559.1	74492.9	410669	11914.9
B9	2	36613.6	6124.08	23846.4	130155	3789.1
B10	2	40571.3	6589.5	23429.8	133300	3992.59
B11	2	46261.3	7354.43	23864.6	143667	5152.23
B12	2	44421.5	7812.95	22824.3	147583	5654.73
C1	2	36574.4	5715.51	20538.3	131383	3731.13
C2	2	43086.3	6286.52	28897.2	179172	5239.6
C3	2	37809.9	4677.84	23115.9	131542	3293.94
C4	2	31050.6	4667.22	22389.4	119550	2963.97
C5	2	31572.4	5251.25	24351	126013	4277
C6	2	30419.1	5059.41	24768.1	126412	2581.71
C7	2	30666.2	5193.28	24480.6	124427	2688.77
C8	2	35807.2	5948.98	25283.1	128944	3792.98
C9	2	43114	8434.75	25572.5	128733	4591.49
C10	2	37591.2	7103.22	24376.8	133547	4234.55
C11	2	34955.6	6403.44	22755.9	136132	3004.02
C12	2	42439.5	6811.86	22679.7	147380	3641.67
D1	2	41541.7	6334.66	21602.9	134546	2917.08
D2	2	36333.6	5576.59	23123.3	135559	2955.65
D3	2	44427.3	7370.14	26251	137183	4861.16
D4	2	34115.6	5947.23	25015.6	126950	4667.41
D5	2	36236.4	5526.35	25203	126798	3217.46
D6	2	38679.4	6533.02	25730.8	122413	4516.34
D7	2	27929.8	4874.21	23985.2	119682	2709.54
D8	2	28553.8	6135.79	23953.6	117297	2384.03
D9	2	33732.7	5725.04	23094.7	122737	3478.79
D10	2	47790.4	8464.42	25606.1	131934	5409.84
D11	2	47644.1	7956.48	25019.5	139257	4033.66
D12	2	126055	16320.1	27653.6	146452	6267.28
E1	2	42802.8	9331.31	22201.3	131629	5334.5
E2	2	41924	6619.8	22075	124978	3434.34
E3	2	68094.7	9037.18	26132.2	134199	6597.18
E4	2	34500.3	5880.44	24936	129917	3169.26
E5	2	29445.9	4884.82	23675.1	121385	2951.35
E6	2	144635	23300.3	35104.8	138472	13381.5
E7	2	45082.6	8146.46	25656.8	120006	7335.92
E8	2	33542.4	6231.55	25722.9	125863	4322.49
E9	2	33611.5	7246.95	26160.3	123022	3561.68
E10	2	37659.1	6502.38	23176.8	122512	4058.06
E11	2	36131.3	6285.76	22273.5	125462	5218.83
E12	2	48712.4	8022.38	23012.2	138481	4846.5
F1	2	45517.3	14240.8	25869.6	143117	8451.36
F2	2	42092.6	6527.66	22769.7	133689	2976.88
F3	2	33687.4	5547.74	25065.7	142118	3026.4
F4	2	34158.2	5750.74	25182.8	132616	3349.89
F5	2	29233.8	4679.58	24664.7	128548	2570.05
F6	2	52274.9	9547.76	28033.3	129154	7031.62
F7	2	28259	4579.98	25400.5	129870	3790.82
F8	2	32000.5	5233.34	24955.5	127629	2774.29
F9	2	33232.7	5499.69	18901.8	96494.8	4267.57
F10	2	35416.3	5978.41	24087.7	133103	4027.26
F11	2	31139.4	4881.55	20326.9	120612	2667.48
F12	2	53036	9549.92	23055.7	134816	5409.27
G1	2	38583.5	9541.29	22674.8	142173	3791.68
G2	2	50987.3	8264.71	24668.9	146391	3750.06
G3	2	38151.3	10367.6	26207.5	141699	2987.07
G4	2	39082.4	7720.36	25063.6	139565	2869.3
G5	2	30397.4	5027.39	25698.7	138653	2956.61
G6	2	31108.6	5300.05	24947	131690	2816.44
G7	2	29792.8	5218.66	25084.1	134280	3558.65
G8	2	37406.2	8753.98	27771	142949	4660.85
G9	2	38864.8	6397.45	24625.4	134544	3304.29
G10	2	50649.9	8933.89	25628.5	140998	3949.66
G11	2	67480.3	11253.7	25706.5	142227	7150.28
G12	2	41870.9	6658.65	23105.8	153362	3096.95
H1	2	55023	14269.9	25769.7	156447	11119.5
H2	2	41706.2	7222.53	24828.9	158233	4091.11
H3	2	36785.3	7018.65	24614.5	145809	5030.56
H4	2	34778.2	6396.79	25296.4	144080	2964.54
H5	2	34729.6	6198.78	26374.8	147534	3188.04
H6	2	42599.3	7420.89	27887.5	153332	3929.35
H7	2	30839.7	6904.48	4227.4	5579.49	3040.08
H8	2	34895.7	6028.62	3921.27	6329.23	3519.51
H9	2	35313.5	5222.47	3664.09	6289.32	3447.45
H10	2	46905.1	10805.5	8096.93	10900.1	6791.54
H11	2	39479.7	6194.15	4107.77	6444.9	3246.15
H12	2	43714.8	5600.69	3535.71	5750.79	3086.57
A1	3	18907.2	3700.71	12933.6	93831.9	2800.99
A2	3	32074.7	4529.38	18397.7	121497	3119.47
A3	3	31115.9	5122.96	20360.7	125627	2599.42
A4	3	33915.1	5164.7	20588.3	119409	3244.47
A5	3	33539.9	5329.41	21741.9	122911	3118.65
A6	3	47064.4	8209.25	26858	142263	5420.52
A7	3	35212.3	5937.67	23191.9	127339	4137.14
A8	3	186992	30462.7	79808.1	415801	20398
A9	3	41891.2	6036.38	22778.4	130136	3656.09
A10	3	31768.2	5781.21	21437.6	131720	4090.27
A11	3	31724.1	4673.14	20503.7	136280	3239.48
A12	3	40672.9	6008.46	20083.1	140219	3792.13
B1	3	34015.6	5443.51	18416.3	123543	3987.36
B2	3	38939.9	6306.24	21068.1	128494	3418.16
B3	3	32333.3	6254.29	22280.1	126080	2960.54
B4	3	30377.1	4779.96	21965.8	123374	3465.95
B5	3	34060.2	5460.52	25766.3	147028	3990.66
B6	3	26962.8	4401.41	23623.9	126603	2869.53
B7	3	29077.3	4716.9	23657.2	125962	3563
B8	3	108574	17642.7	74805.3	409286	10833.7
B9	3	36548.5	6104.9	23610.7	129541	3694.23
B10	3	41393.7	6520.37	23384.1	132985	3988.64
B11	3	46387.9	7528.37	23757.7	143411	5705.32
B12	3	44835.3	7959.82	22659.9	147759	5494.49
C1	3	36554.4	5929.01	20523.3	130724	3356.56
C2	3	43208.1	6725.59	29015.7	178850	5249.81
C3	3	37396.3	4917.23	23017.2	131905	3223.07
C4	3	31234.6	5127.36	22564.5	119208	3008.24
C5	3	31353.6	5174.17	24164.1	125750	3644.08
C6	3	30099.9	5095.96	24749.8	126232	2411.5
C7	3	30926.9	5221.07	24413.8	124053	2569.21
C8	3	35779.9	6071.91	25393.7	128655	3615.02
C9	3	43171.8	8212.99	25611.4	128734	4446.57
C10	3	37559.6	7080.71	24528.7	133247	3950.12
C11	3	34582.2	6317.08	23057.8	136151	2870.39
C12	3	42838.8	6731.09	22883.7	147298	3664.19
D1	3	41700.7	6531.7	21640.9	134336	3333.54
D2	3	36062.3	5517.84	23122.2	135185	2615.33
D3	3	44184.4	7641.98	26131.5	136585	5484.74
D4	3	34009.7	6148.71	24797.3	126765	5008.95
D5	3	36072.9	5768.23	25110.4	126692	2906.9
D6	3	38544.1	6609.91	25670.4	122402	4253.4
D7	3	28101.6	4910.47	24030.8	118747	2913.62
D8	3	28247.3	6218.04	23819.4	117606	2685.18
D9	3	33800.9	5928.37	23310.9	123324	3543.83
D10	3	47476.1	8305.94	25503.6	131857	5356.62
D11	3	47498	8081.93	25160.7	139174	3854.34
D12	3	127748	16591.2	27892.9	146819	6111.27
E1	3	42967.3	9194.62	22338.7	131631	5470.85
E2	3	41941	6776.88	22066.5	124596	3639.79
E3	3	67825.4	9015.8	26139.6	134006	6285.71
E4	3	34060.6	5859.09	25045.1	129410	3559.9
E5	3	29501.1	5027.24	23644.7	121152	2957.97
E6	3	144609	22978.2	35133	137444	13385.2
E7	3	45266.7	7975.01	25566.4	119833	7401.24
E8	3	33601.4	6210.79	25692.8	125165	4002.91
E9	3	33401.2	7416.08	26112.2	122671	3641.16
E10	3	37437.2	6513.92	23227.3	122370	4410.62
E11	3	36507.9	6499.69	22276.4	125634	5470.21
E12	3	48951.2	7969.72	23024.4	138412	5196.35
F1	3	46017.4	14212.2	26141.7	142481	8697.61
F2	3	42871	6692.29	22766.6	133280	3244.63
F3	3	34027.6	5652.42	25045.4	141468	3076.85
F4	3	33833.1	5702.15	25214.4	132283	3518.6
F5	3	29208.9	4663.38	24766.9	128421	2470.85
F6	3	52189.7	9887.81	28003.7	128846	6911.25
F7	3	27789.3	4647.01	25377.1	129888	3640.77
F8	3	32318.5	5553.28	25079.1	126919	2686.87
F9	3	33402.2	5598.66	18877	96171.5	4413.9
F10	3	35530.3	5803.32	24115.1	133041	4336.51
F11	3	31397.9	4794.02	20204.2	119902	2854.53
F12	3	53808.3	9587.67	23082.7	134511	5378.65
G1	3	38934.4	9462.38	22420.5	141659	3975.98
G2	3	51354.5	8255.25	24647.9	146344	4143.88
G3	3	38447.9	10143.2	26193.3	141378	3240.35
G4	3	39069	7671.14	25090.8	139414	2938.72
G5	3	30311.8	5015.77	25662.1	138835	2831.18
G6	3	30910.8	5374.96	25033.5	131389	2803.04
G7	3	29810.5	5254.85	25081	133694	3582.19
G8	3	37740.2	9085.63	27880.9	142355	4411.57
G9	3	39098.8	6470.29	24532.5	134535	3067.77
G10	3	50996.7	9095.98	25776.3	141067	4114.5
G11	3	68051.5	11518.4	25709.7	141602	7036.96
G12	3	41814.8	6559.15	23203.8	153511	3476.79
H1	3	55682.3	14600.9	25946.1	157334	10907.1
H2	3	41656.5	7016.07	24790.3	157727	4702.07
H3	3	36924.4	7009.94	24485.2	145151	4913.47
H4	3	34497.7	6239.29	25286	143747	3148.05
H5	3	35041.1	6366.15	26217.9	147062	3282.62
H6	3	43228.7	7605.33	28007.5	152736	3835.29
H7	3	30870.4	7091.66	4314.53	5580.27	2910.7
H8	3	35087.8	5967.79	3946.27	6502.52	3538.81
H9	3	35018.9	5394.22	3625.29	6265.7	3125.45
H10	3	47061.6	10668.5	8107.68	11252.6	6849.31
H11	3	40322.9	6551.68	4026.78	6227.55	3795.45
H12	3	43733	5611.06	3437.95	5961.84	3539.81
A1	4	19254.8	3727.5	13147.4	93718.5	2802.43
A2	4	32609.4	5029.76	18160.2	121174	3159.6
A3	4	31366.8	4860.06	20425	125735	2494.39
A4	4	34311.9	5373.27	20565.5	119280	2943.57
A5	4	33443	5358.24	21649.7	122719	3224.74
A6	4	47050.1	8279.08	26811.8	142001	5496.89
A7	4	35598.9	5874.13	23435.7	127555	4346.88
A8	4	188369	30630.6	80230.7	415532	20462.4
A9	4	42022.5	6023.16	22712.3	129985	3260.52
A10	4	31891.5	5506.29	21680.5	131633	4291.41
A11	4	31402.1	5061.07	20511.8	135955	3368.41
A12	4	40718.5	6157.26	19825.8	140126	3952.8
B1	4	34553.2	5381.7	18261.6	122560	3736.99
B2	4	39248.3	5824.46	20946.3	128248	3829.96
B3	4	32345.6	6462.56	22431.6	126217	3050.22
B4	4	30193.3	5020.15	21833.9	123219	3456.24
B5	4	33624.4	5238.56	25879.3	146411	4445.59
B6	4	27203.9	4057.21	23385.8	126184	2710.87
B7	4	29356.1	4730.01	23460.7	125573	3455.6
B8	4	109219	17836.9	74501.3	409457	10907
B9	4	36521.7	5917.75	23637.9	129452	3519.24
B10	4	41482.4	6655.67	23386.1	132621	3773.41
B11	4	47005.9	7515.53	24040.4	142628	5544.82
B12	4	45116.1	7915.19	22842.3	147237	5696.9
C1	4	36594.5	5857.84	20597	130012	3331.89
C2	4	43417.4	6747.72	29046.1	178819	5510.09
C3	4	37559.6	4918.38	23006.8	131211	3083.57
C4	4	31467.3	5044.39	22213.3	119068	3389.4
C5	4	31617.7	5004.2	24211.6	125541	3551.8
C6	4	30186.5	4919.86	24597	125439	2823.64
C7	4	30953.2	5144.05	24304.4	123621	2609.61
C8	4	35970.1	6139.43	25291.2	127784	3687.82
C9	4	42692.9	8338.22	25340.1	127961	4435.77
C10	4	37785	7065.05	24354.8	133252	4111.23
C11	4	35214.4	6266.8	22719.9	135715	3128.82
C12	4	43204.7	6810.67	22987.4	147548	3374.95
D1	4	41701.8	6656.03	21683.8	134183	2838.22
D2	4	36165.5	5516.69	23182.7	135295	3086.96
D3	4	44192.5	7378.57	26093.4	136364	5084.47
D4	4	34263.7	5885.87	24811.1	126314	4902.15
D5	4	36101	5728.55	25336.4	125982	3101.63
D6	4	38394.4	6514.88	25517.8	122008	4206.09
D7	4	27945.9	4691.16	23991.6	118752	2880.82
D8	4	28515.6	6154.37	23773.7	116628	2623.64
D9	4	33896.1	5864.72	23142	123733	3706.43
D10	4	47607.8	8299.37	25556.3	131620	5094.4
D11	4	47973.2	7890.12	25145.2	139505	4025.32
D12	4	129755	16862.2	27957.2	146925	6737.31
E1	4	43289.2	9303.74	22235.1	131023	5292.55
E2	4	41815.1	6652.3	22069.7	124364	3797.27
E3	4	67577.5	8873.59	25846.8	133742	6525.66
E4	4	34214.8	5929.36	25019.4	128878	3383.36
E5	4	29669.7	4685.78	23632.7	120453	2774.52
E6	4	144599	23201.8	34950.1	137070	13246.7
E7	4	45132.9	8000.9	25576.7	119710	7760.03
E8	4	33447.6	6029.4	25651.3	124740	4269.71
E9	4	33274	7144.77	26189.3	122685	3527.08
E10	4	37418.8	6442.85	23213.8	121938	4154.47
E11	4	36447.2	6383.09	22192.2	125570	5713.95
E12	4	49442.4	8147.77	22994.3	137721	5170.65
F1	4	45653.8	14039.3	26272.6	142592	8950.23
F2	4	43363.2	6785.62	22860.6	133239	2990.17
F3	4	33890.1	5504.8	25037.4	141203	3082.26
F4	4	33986.1	5687.91	25029.5	132172	3346.41
F5	4	29047.4	4743.55	24680.5	128363	2432.69
F6	4	52091.4	9602.17	27872	128412	6896.9
F7	4	28069.8	4749.9	25357	130188	3497.32
F8	4	32412.5	5389.01	25004	126570	2794.08
F9	4	33367.5	5463.48	18839.8	96012.3	4557.69
F10	4	35287.2	5847.52	24029.4	132973	4492.88
F11	4	31684.4	4806.09	20345.7	119949	3096.31
F12	4	54008.9	9758.4	23185.9	134348	5742.75
G1	4	39142	9718.84	22609.9	141643	4116.46
G2	4	51731.3	8185.46	24803.7	146208	3570.65
G3	4	38598	10567.6	26379	141636	3133.2
G4	4	38670.6	7463.77	25171.1	139143	2812.94
G5	4	30595.2	4819.11	25497.9	138735	2806.73
G6	4	30940.8	5266.93	24980	131178	2697.32
G7	4	29928	5327.24	25152.3	133499	3237.07
G8	4	37434.6	8850.61	27860.1	142251	4686.28
G9	4	39266.6	6564.56	24572.1	134065	3429.56
G10	4	51186.4	8949.11	25871.3	140816	4136.47
G11	4	68883.3	11849.5	25962.4	141548	7102.34
G12	4	42317.6	6864.91	23263	153250	3631.93
H1	4	55734.3	14442.5	25802.7	156320	11179.9
H2	4	41194.7	7109.1	24668.6	157901	4423.1
H3	4	36764.9	6820.54	24606.3	144839	4986
H4	4	34632.3	6387.72	25234.2	143883	2915.01
H5	4	35020.3	6241.75	26388.9	146854	3368.94
H6	4	43676.1	7585.51	27985.8	152425	4350.74
H7	4	30874.1	6848.64	4222.73	5655.53	2859.11
H8	4	34971.5	6050.3	3957.38	6475.75	3470.92
H9	4	35016.3	5475.71	3569.23	6042.58	3221.7
H10	4	46997.6	10991.9	8236.65	11072.4	6788.55
H11	4	40049	6550.54	4147.17	6286.11	3868.77
H12	4	43427.3	5531.11	3569.66	5750.79	3610.41
A1	5	18632.9	3287.1	13064.1	93653.3	3015.79
A2	5	32722.3	4794.95	18455.9	120840	2808.08
A3	5	31705.6	5169.85	20622	125315	2513.14
A4	5	33944.5	5207.33	20703.6	119386	2892.89
A5	5	34071	5281.03	21513	122597	3321.98
A6	5	47464	8392.67	26829	142070	5690.44
A7	5	35754.2	6134.05	23248.7	127188	4373.34
A8	5	190335	30502.6	79977.1	415598	21167.4
A9	5	42511.9	6370.94	22698	130121	3453.36
A10	5	32194.4	5581.27	21613.3	131390	4266
A11	5	32157.8	4931.76	20594	136658	3024.6
A12	5	46491.6	6267.37	20091.4	140055	4093.56
B1	5	34162.6	5517.29	18203.3	122598	3706.54
B2	5	39682.9	6361.26	21144.5	128472	3607.12
B3	5	32509.8	6346.29	22264.9	126368	3181.2
B4	5	30214.4	4545.44	21938.3	123095	3785.15
B5	5	33887.4	5280.58	25959.4	146749	4411.8
B6	5	27217.8	4219.83	23468.3	126365	2725.37
B7	5	29256.5	4650.47	23577.5	125522	3188.42
B8	5	109572	18017.6	74613.9	409436	11469
B9	5	36746.8	6137.77	23584.6	129330	3533.05
B10	5	41599	6690.24	23474.5	133011	3871.15
B11	5	47096.7	7663.78	23961.1	142924	5235.36
B12	5	45700.4	8265.08	22762.1	146928	5459.35
C1	5	37102.8	6186.69	20743.3	130957	3558.42
C2	5	44024.7	6717.08	29110.5	178882	5186.87
C3	5	37549.2	5183.21	23011.4	131560	3101.57
C4	5	31279.1	5087.49	22252.1	119323	2853.83
C5	5	31485.7	5025.94	24061.9	125709	3629.03
C6	5	30229	4931.49	24534.1	125458	2762.29
C7	5	30552	4849.5	24351.2	123689	2705.26
C8	5	35869.5	5800.95	25321.2	128057	3592.55
C9	5	42998.6	8094.72	25507.4	128384	4274.65
C10	5	37752.3	6993.61	24178.9	132976	4194.77
C11	5	35379	6203.4	22951	136007	3114.46
C12	5	43526.9	7010.22	22986.2	146991	3382.06
D1	5	42060.4	6783.53	21658.9	134456	3192.15
D2	5	36393.9	5421.08	23211.8	135664	2929.39
D3	5	44155.9	7525.03	26125.2	136727	4954.91
D4	5	34121.3	5927.8	24789.9	126698	4988.86
D5	5	36027.2	5562.26	24987	126207	3046.7
D6	5	38392	6650.52	25578.1	121938	4343.48
D7	5	27749.9	4719.65	23913.9	118514	2852.58
D8	5	28582.9	6039.4	23721.6	116676	2591.94
D9	5	33613.1	5776.32	23326.7	123880	3620.35
D10	5	47439	8545.07	25460.5	131809	5246.32
D11	5	47908.6	7951.3	25226.6	139868	4122.28
D12	5	131388	17119.7	28063.2	147057	6654.83
E1	5	43545	9248.61	22289.6	131118	5511.76
E2	5	41933.6	6652.3	22037	124674	3720.1
E3	5	67350.1	8867.09	25938.2	134203	5907.44
E4	5	34226.2	5602.03	24867.2	128915	3362.71
E5	5	29441.1	4783.09	23707.3	120677	2975
E6	5	143911	23212.2	34923.8	136985	13343.9
E7	5	45304.9	7976.79	25551.3	119971	7846.18
E8	5	33278.7	6294.72	25510.8	124743	3977.96
E9	5	33739.6	7382.6	26108.6	122459	3540.18
E10	5	37190.9	6494.38	23056.7	122104	4706.25
E11	5	36502	6278.06	22321.3	125536	5582.05
E12	5	49626.9	8529.79	23158.6	138058	4999.04
F1	5	45851.2	14085	26063.2	142732	8825.19
F2	5	43592	6922.99	22928.2	133752	3241.56
F3	5	33973.7	5557.58	25102.1	141221	3003.87
F4	5	34057.5	5733.99	25256.1	132067	3641.22
F5	5	29187	4777.56	24800.2	128304	2411.49
F6	5	52331	9783.53	27816.7	128393	6641.02
F7	5	28113	4637.66	25467.4	130491	3768.56
F8	5	32029.9	5298.27	25037.1	126917	2667.08
F9	5	33733.6	5698.43	18774.4	96352.9	4349.24
F10	5	35354.2	5889.17	23939.4	132849	4505.99
F11	5	31716.5	4951.98	20297.2	120029	2827.67
F12	5	54012.6	9999.49	23228.5	134375	5791.57
G1	5	39178.6	9356.69	22406.3	141245	3825.19
G2	5	52040.1	8438.59	24957.3	146416	3931.66
G3	5	38780.5	10427.6	26241	141686	3133.2
G4	5	40348.2	8128.65	25137.4	139277	3185.39
G5	5	30663.1	5045.97	25490.9	138387	2876.94
G6	5	30885.5	5302.94	24900.8	130833	2725.61
G7	5	30076.6	5252.59	25058	133708	3544.54
G8	5	37655	8771.17	27885	142365	4653.21
G9	5	39556.4	6464.29	24573.8	134291	3623.16
G10	5	51445.4	9233.89	25820.2	140700	4111.75
G11	5	69088.4	11727.8	25987.4	141780	7288.67
G12	5	42222.7	6630.74	23143.4	153042	3564.62
H1	5	55585.9	14216.5	25708.2	156444	10516.5
H2	5	41380	7074.69	24848.8	157176	3949.32
H3	5	36948.1	7025.18	24569.3	144624	4717.64
H4	5	34672.8	6391.02	25258.1	143357	3277.15
H5	5	35194.3	6271.16	26388.1	146747	3460.52
H6	5	44039.6	7710.5	27910.8	152447	4585.52
H7	5	30800	7140.42	4295.08	5694.32	2928.16
H8	5	35167.6	6063.58	3934.46	6489.84	3573.82
H9	5	35403.6	5339.89	3635.63	6098.58	3443.07
H10	5	46818.8	10918.3	8188.77	11175.5	6826.4
H11	5	39973	6781.61	4169.06	6493.32	3658.97
H12	5	43597.5	5519.27	3743.45	6052.49	3429.68
A1	6	19145.8	3277.06	13257.4	93445.2	2913.43
A2	6	33081.9	4884.02	18414.6	120855	3303.54
A3	6	31795.2	5384.43	20404.5	125255	2803.22
A4	6	34465.5	5228.08	20500.5	119217	2911.9
A5	6	34227.8	5403.53	21867.3	122568	3155.98
A6	6	47494.8	8350.99	26767.8	141874	5733.34
A7	6	35773.5	5919.38	23347.6	127270	4187.22
A8	6	191367	30829.9	80399.7	414683	21415.6
A9	6	42472.7	6532.63	22882.3	129812	3419.73
A10	6	32117	5586.95	21583.1	131187	4161
A11	6	32094.8	5094.6	20636.8	135949	3175.6
A12	6	56192	6612.58	20231.9	140509	4286.94
B1	6	34120.9	5431.55	18378.1	123442	4369.69
B2	6	39202.4	6324.08	21086.5	128330	3715.28
B3	6	32221	6120.14	22169	126687	3309.82
B4	6	30391.1	4739.17	22026.6	122864	3492.91
B5	6	33763.1	5496.07	26074.8	147174	4396.12
B6	6	27112.5	4178.27	23395.2	126584	2680.95
B7	6	29019.3	4760.61	23579.3	125432	3357.07
B8	6	109446	17925.9	74478.8	409543	11209.4
B9	6	36629	6246.41	23519.1	129172	3487
B10	6	41789.3	6814.68	23378.2	132852	3785.26
B11	6	47803	7708.14	24001.4	143176	5468.61
B12	6	46104.5	8183.01	22893.4	147581	5658.95
C1	6	37151.7	5742.5	20646.6	130448	3347.59
C2	6	43842.9	6808.98	28865.1	179276	5229.4
C3	6	37195.8	4828.18	23104.3	131669	2996.95
C4	6	31621.8	4750.19	22366.2	119455	3057.91
C5	6	31646.7	5123.77	24189.9	125723	3562.83
C6	6	30388.6	4925.68	24464.2	125327	2564.43
C7	6	30741.8	5038.46	24370.4	123377	2297.12
C8	6	35745.8	5874.53	25241.3	128225	3585.36
C9	6	42721.8	8242.56	25653.9	127909	4587.89
C10	6	37660.4	7028.84	24377.8	133071	4227.59
C11	6	35173.5	6294.13	23068.7	136179	2768.78
C12	6	43941.6	7222.83	22979.3	147414	3555.13
D1	6	42030.6	6862.55	21730.8	134352	2865.15
D2	6	36247.8	5463.7	23143.5	135689	2620.8
D3	6	44088.8	7371.2	26090.3	136677	5143.46
D4	6	34017.4	5940.07	24851.4	126367	4882.06
D5	6	35897.9	5703.98	25028.8	125856	3105.62
D6	6	38374.4	6725.68	25473	121760	4413.53
D7	6	27925.8	4846.58	23929.5	118859	2672.19
D8	6	28697.5	6189.74	23924.7	116472	2549.05
D9	6	33913	5972.57	23477.9	124359	3735.13
D10	6	47758.9	8465.36	25679.9	131582	5204.71
D11	6	47910.8	8088.16	24936	139976	4393.35
D12	6	132687	17261	28330.9	146774	6819.78
E1	6	43512.6	9516.23	22256.9	131046	5553.71
E2	6	41793.9	6732.46	21830.4	124863	3581.39
E3	6	67667.5	8793.66	25984.8	134129	6272.54
E4	6	33829.7	5608.25	25039.6	128792	3638.78
E5	6	29578.1	4661.02	23724.9	120577	2844.5
E6	6	143826	22978.2	34802.8	136682	13471.3
E7	6	45179.9	8153.6	25501.4	119308	7328.34
E8	6	33164.8	6225.23	25724.8	124967	4403.1
E9	6	33537.6	7328.87	26161.2	122531	3846.88
E10	6	37345.5	6168.33	23051.3	122082	4253.62
E11	6	36999.9	6239.51	22296.5	125350	5640.35
E12	6	49793.2	8304.92	23070.7	137791	5267.65
F1	6	46312.8	14162.2	26165.3	142756	9119.92
F2	6	43911.7	6639.86	23019.1	133500	3009.58
F3	6	33900.6	5494.96	25108.3	141309	3087.67
F4	6	34488	5870.55	25176.9	132639	3282.06
F5	6	29354.6	4778.37	24809.4	128457	2845.63
F6	6	52326.2	9714.76	27861.9	128463	6646.6
F7	6	28385.5	4614.27	25460.2	130998	3649.02
F8	6	31949.1	5266.19	24931.3	127050	2828.72
F9	6	33749.4	5431.29	19021	96214.4	4196.95
F10	6	35269.6	5789.72	23954	132626	4285.84
F11	6	31621.3	4876.52	20226.9	120206	2654.55
F12	6	54376.3	9905.11	23194.1	134012	5840.39
G1	6	39029.4	9599.06	22385.5	141104	3656.35
G2	6	51575.1	8469.35	24757.3	146097	3648.32
G3	6	38794	10372.2	26279.9	141563	3209.36
G4	6	39140.3	7691.31	25081.2	139080	3054.7
G5	6	30474.2	5007.26	25497.9	138224	3041.81
G6	6	30982	5323.82	24880.3	130994	2814.95
G7	6	30030.6	5242.78	25078.7	133598	3311.58
G8	6	37497.6	8699.93	27741.1	142020	4770.22
G9	6	39275.9	6418.01	24588.4	134041	3305.17
G10	6	51334.7	9183.74	25769.1	140401	4644.72
G11	6	69752.3	11698.6	26021.2	141330	7263.61
G12	6	42233.4	6830.94	23208.3	152897	3588.58
H1	6	55715.1	14088.3	25895.7	156112	10482.4
H2	6	41436.4	7028.81	24499	157082	4197.16
H3	6	36625.8	6869.52	24571.4	144632	5261.62
H4	6	34952.4	6386.9	25252.5	143673	3146.42
H5	6	35340.8	6290.76	26412.5	147095	3594.89
H6	6	44257.6	7773.76	27947.5	152594	3997.42
H7	6	30901.8	6929.65	4293.53	5460	2836.88
H8	6	35185.2	6102.04	3968.49	6376.43	3609.56
H9	6	35154.9	5552.82	3650.29	5986.58	3145.58
H10	6	46833	10916.3	8170.21	11270.6	6758.67
H11	6	40163.6	6265.43	4151.55	6438.14	3351.05
H12	6	43002.6	5692.48	3556.08	6242.3	3445.21
A1	7	19157.1	3328.97	13309.3	93224.6	2782.25
A2	7	32475.7	5101.02	18279.7	120958	2958.93
A3	7	31821.3	5309.12	20318.3	125558	3207.07
A4	7	34064.9	5468.91	20661.4	119124	3335.27
A5	7	34280.8	5369.56	21729.5	122331	3579.33
A6	7	47358.3	8510.44	26974.1	142007	5760.54
A7	7	35836.7	6001.2	23385.8	126999	4374.28
A8	7	191544	31566.9	80810.6	414567	20833.3
A9	7	42853.9	6599.75	22701.1	129757	3763.88
A10	7	32334.7	5592.63	21567.4	131288	4429.56
A11	7	32079.1	5070.65	20507.2	136211	3454.36
A12	7	58147.4	6600.68	20179.1	140460	4067.97
B1	7	34346.9	5519.28	18336.2	122546	4055.03
B2	7	39479.5	6269.07	21211.1	128435	3719.19
B3	7	32370.2	6431.89	22291.5	126401	3289.76
B4	7	30545.6	4884.19	21733	123067	3253.5
B5	7	33869.8	4974.59	25761.6	147080	4746.07
B6	7	27451.5	4194.53	23345.5	126329	2791.56
B7	7	29158.8	4709.04	23528.6	125148	3545.25
B8	7	109366	17820.7	74481.6	408689	11032.2
B9	7	36541.8	6068.39	23807.1	129127	3782.65
B10	7	41901.6	7000.36	23498.3	133037	3828.7
B11	7	47815.8	7521.36	24084.1	143022	5392.4
B12	7	46021.7	8311.16	22916.9	147030	6094.68
C1	7	37306.9	6049.26	20749.1	130970	3468.71
C2	7	44494.8	7093.19	29090.1	179365	5324.66
C3	7	37253.8	5102.26	23104.3	131684	3017.2
C4	7	31169.1	5221.12	22573.3	119509	3154.01
C5	7	31673.7	5012.1	24392.3	125522	3909.89
C6	7	30306.8	4944.78	24542	125380	2428.78
C7	7	30825.1	5184.55	24333.6	123372	2553.54
C8	7	35883.1	6038.15	25294	127896	3626.7
C9	7	42488.3	8185.16	25346.4	128219	4698.61
C10	7	37556.6	7115.95	24291.8	132789	4172.89
C11	7	35497	6403.44	23176.6	136133	3112.26
C12	7	44008.3	7085.05	23131.4	147469	3799.33
D1	7	42019.6	6622.32	21619.9	134461	3218.12
D2	7	36650.2	5466	23260	135693	2917.35
D3	7	43929.3	7448.11	26057.5	136602	5051.82
D4	7	34151.2	5742.69	24758.1	126386	5113.63
D5	7	35905	5774.84	25132.3	125770	3074.66
D6	7	38290.4	6674.71	25487.6	121440	4590.04
D7	7	27880	4838.81	23861	118391	2739.61
D8	7	28646	6256.07	23693.6	116666	2405.47
D9	7	33636.4	5853.23	23389.8	124894	3861.39
D10	7	47430.7	8273.11	25534.3	131841	5084.73
D11	7	48153.1	8043.57	25206	139771	4479.88
D12	7	134010	17446.3	28424.5	147014	6726.38
E1	7	43870.5	9476.03	22386.7	131190	5607.21
E2	7	41942	6473.56	22070.7	124915	3529.24
E3	7	67098.6	8911.7	26010.9	133862	6191.62
E4	7	33952.9	5937.37	25124.8	128724	3410.6
E5	7	29496.2	4984.78	23665.9	120254	3336.23
E6	7	143723	23078.3	34887.4	136824	13486
E7	7	44920.3	7889.28	25470.3	119392	8010.91
E8	7	33140.6	6415.65	25549.5	124740	4125.75
E9	7	33764.5	7402.86	26159.4	122130	3583.19
E10	7	37423.2	6513.04	22975.5	122171	4426.23
E11	7	36620.4	6437.05	22370.2	125607	5667.12
E12	7	49713.1	8299.91	23068.3	137661	5390.35
F1	7	46253.4	14308	26061.9	142944	9035.71
F2	7	44382.9	6992.2	23024.2	134096	3423.47
F3	7	34123.3	5439.49	24986	141416	2881.34
F4	7	34316.7	5651.04	25331.9	132319	3815.15
F5	7	29141.7	4763.79	24732	128394	2769.32
F6	7	52384.4	9614.26	27828.4	128473	6888.93
F7	7	28145.3	4700.01	25595.6	131572	3711.67
F8	7	32234.8	5388.23	24998.3	126732	2827.07
F9	7	33724.5	5712.11	18896	95887.8	4372.21
F10	7	35139.6	5968.21	23967.7	132972	4480.65
F11	7	31758.9	5041.52	20342.7	120280	3009.74
F12	7	54715.3	9981.47	23293.2	134057	5835.42
G1	7	38681.5	9449.69	22506.2	141290	3854.83
G2	7	52115.2	8560.43	24643.5	146484	3920.72
G3	7	39126.6	10530.3	26454.1	141346	3207.59
G4	7	40578.4	8204.5	25046.7	139021	3049.8
G5	7	30593.7	4826.07	25455.8	138207	3141.99
G6	7	31151.9	5385.76	24921.4	131155	2587.14
G7	7	30127.6	5208.85	25041.9	133595	3255.89
G8	7	37827	8948.87	27736.1	142008	4738
G9	7	39485.2	6518.28	24594.4	133975	3377
G10	7	51130.2	9023.44	25731.5	140789	4163.95
G11	7	69818.3	11813.4	25895.9	141836	7537.11
G12	7	42159.8	6767.84	23175.3	152772	3508.73
H1	7	56382.1	13808.9	25958.7	155799	10426.6
H2	7	41573.3	7088.71	24741.2	157678	4048.46
H3	7	36609.6	6797.68	24331.2	144188	4999.47
H4	7	35000.2	6292.89	25211	143501	2958.86
H5	7	35601.1	6176.92	26334.8	146683	3499.56
H6	7	44456.9	7917.04	28082.6	152300	4041.77
H7	7	30859.9	7009.08	4304.42	5679.58	2715.44
H8	7	34864.6	6134.2	3975.43	6503.93	3253.67
H9	7	35321.3	5401.23	3568.37	6221.95	3412.45
H10	7	46886.8	10891.1	8125.26	11306.7	6680.99
H11	7	40026.1	6462.01	4144.98	6171.25	3707.47
H12	7	43493.4	5542.95	3541.14	6167.22	3151.52
A1	8	19305.5	3077.79	13139.5	93428.1	2671.25
A2	8	32624.4	4950.41	18200.1	120968	3097.32
A3	8	31959.7	5165.59	20513.9	125349	2536.9
A4	8	34706.1	5266.1	20638.5	119715	2947.79
A5	8	34248.1	5404.56	21811.3	122614	3674.61
A6	8	47667.6	8369.75	26977.3	141798	5964.56
A7	8	35678.2	5775.94	23387.8	127167	4105.02
A8	8	193202	31057.5	80749.4	415091	21795.7
A9	8	42886.1	6258.06	22881.3	129764	3716.41
A10	8	32677	5531.28	21570.8	131230	4663.86
A11	8	31967.5	4764.14	20398.5	136026	3417.19
A12	8	57313.8	6797.09	20243	140122	4097.83
B1	8	34752.8	4805.44	18465.4	122337	3571.2
B2	8	39569.7	6298.8	20971.8	127764	4042.37
B3	8	32676.8	6529	22004.9	126545	3696.85
B4	8	30165.2	4861.53	22012.8	123307	3212.52
B5	8	33829.1	5347.38	25940.6	147124	4203.04
B6	8	27157.7	4245.12	23349.3	126179	2657.37
B7	8	29203.1	4690.68	23440.7	125253	3302.92
B8	8	109766	17499.8	74219.9	408776	11624.7
B9	8	36737.2	6096.69	23817.4	129459	3763.31
B10	8	42083.4	6745.55	23562.9	132814	3883
B11	8	48257.2	7662.62	23970.3	142896	5903.93
B12	8	46235.9	8060.62	22762.1	147284	6063.76
C1	8	37017.7	6201.41	20553.3	131016	3535.99
C2	8	43667.9	6705.17	29025.8	179923	5601.95
C3	8	37489	5169.33	23215.7	131645	2995.82
C4	8	31596.4	5014.21	22462.6	119404	3137.81
C5	8	31589.8	4966.65	24131.1	125879	3783.5
C6	8	30327.7	4947.27	24666.8	125257	2515.18
C7	8	30682.4	5218.69	24339.5	123415	2701.13
C8	8	35854.1	5943.79	25047.2	128310	3462.22
C9	8	42708.2	8258.21	25410.6	128243	4594.19
C10	8	37810.7	6728.39	24270.8	132855	4635.33
C11	8	35917	6256.96	23125.3	135719	3281.23
C12	8	44394.7	7092.17	23056.5	146664	4157.34
D1	8	42149.8	6716.09	21809.8	134643	3756.72
D2	8	36272.2	5431.44	23163.6	135986	2992.86
D3	8	44199.6	7577.71	26115.6	136396	5140.3
D4	8	33950.1	5850.07	24759.2	126099	4983.57
D5	8	35983.2	5547.14	24982.1	126408	3171.53
D6	8	38172.7	6638.42	25530.6	121916	4049.6
D7	8	27945.9	4837.08	23828.1	118616	2952.8
D8	8	28744.1	6363.08	23643.3	116735	2689.84
D9	8	33557	5920.42	23543.8	125079	3746.61
D10	8	47531.7	8425.97	25564	131720	5246.32
D11	8	47865.2	8051.87	25146.3	139801	3893.96
D12	8	135088	17717.4	28604.3	147312	6878.41
E1	8	43220.7	9355.43	22183.8	131141	5778.17
E2	8	41516.7	6643.63	22144.5	124700	3758.68
E3	8	67080.8	8828.98	25960.6	133960	6111.63
E4	8	34188.7	5902.68	24907.6	128902	3551.45
E5	8	29371.4	4649.52	23757.1	120982	2885.16
E6	8	142960	22948.8	34727.3	136495	13310.9
E7	8	45192.1	8019.66	25496.7	119654	7319.82
E8	8	33295.4	6218.91	25552.3	124933	4190.05
E9	8	33777.8	7363.23	26088.6	122715	3452.28
E10	8	37281.7	6414.42	23053.1	122254	4389.5
E11	8	36486.4	6406.22	22341.4	125862	5594.47
E12	8	50087.1	8475.45	23054.5	137275	5479.05
F1	8	46808.4	14100.7	26267.3	142347	9071.44
F2	8	44470.7	6895.73	23087.8	133632	3377.48
F3	8	34052	5635.42	24893.9	141591	2973.24
F4	8	34238.2	5713.88	25131.7	132510	3237.7
F5	8	29031.5	4775.94	24738.7	128393	2647.22
F6	8	52459.2	9726.86	27827.6	128573	6762.18
F7	8	28113	4771.72	25471.5	131637	3529.47
F8	8	32360.4	5412.48	24983.8	126981	2512.04
F9	8	33729.8	5646.94	18798.4	96343	4633.41
F10	8	35238.5	5873.87	24068	133042	4270.12
F11	8	31601.7	4986.18	20433.8	120170	2663.5
F12	8	54471.6	10020.1	23137.6	134075	6136.63
G1	8	38982.6	9500.42	22345.3	141041	3857.41
G2	8	52275	8283.64	24755.1	146891	3918.53
G3	8	39167	10664.8	26426.7	141977	3275.78
G4	8	39649.9	7320.14	25110.1	139222	3165.79
G5	8	30621.8	4925.18	25383.4	138856	3053.64
G6	8	31180.5	5385.76	24907.4	130916	2782.2
G7	8	30023.5	5257.11	24943.9	133408	3345.31
G8	8	37578.2	8589.38	27632.1	141725	4599.8
G9	8	39546.2	6557.7	24567.8	134444	3531.18
G10	8	51310.2	9048.52	25734.2	141123	4505.52
G11	8	70004.8	11650.1	26028.8	141540	7708.18
G12	8	42607.8	6648.94	23277.8	152591	3622.8
H1	8	56299.2	13929.9	25805.9	155656	10823.4
H2	8	41457.9	7019.89	24632.4	157292	4290.54
H3	8	36665.7	6993.61	24511.9	144361	5057.5
H4	8	35383.6	6513.07	25282	143494	3245.48
H5	8	35619.6	6419.68	26360	146713	3440.26
H6	8	44569.4	8069.46	28039.8	152309	4411.92
H7	8	30855.4	7027.17	4292.75	5370	2862.28
H8	8	35096.6	6071.27	4000.43	6396.86	3656.01
H9	8	35339.5	5430.15	3532.15	5875.46	3246.2
H10	8	47108.3	11099.6	8307.98	11082.4	6791.54
H11	8	40542.4	6386.14	4037.72	6156.61	3798.83
H12	8	43766.1	5947.13	3660.63	6263.54	3586.4
A1	9	19174	3730.85	13098.6	93108.1	2629.44
A2	9	32654.5	4864.59	18365.5	121584	3346.44
A3	9	32137.3	5331.85	20481.1	125860	2871.98
A4	9	34465.5	5404.38	20571.2	119009	2843.27
A5	9	34179.3	5441.62	21897.3	122509	3409.4
A6	9	47731.4	8420.81	26906.4	141727	5622.44
A7	9	35846.3	6146.56	23365.2	126997	3995.43
A8	9	193986	31131.5	80425.9	415270	21283.8
A9	9	43349	6357.72	22529	129828	3699.6
A10	9	32496	5772.12	21547.3	130845	4763.33
A11	9	31662.6	4935.35	20436.6	136080	3186.05
A12	9	56868.7	6715.25	20028.9	139829	4286.94
B1	9	34164.8	5250.1	18156	122940	3603.34
B2	9	39509	6402.89	21096.4	128108	3918.57
B3	9	32719.3	6512.39	22473.2	126190	2966.44
B4	9	30467.2	5005.42	21961.2	122878	3534.96
B5	9	33528.6	5389.41	25821.7	146926	4165.63
B6	9	27082	4199.05	23395.2	126341	3015.5
B7	9	29078.2	4802.57	23357.4	125049	3634.01
B8	9	109454	17386.5	74135.4	408868	11444.5
B9	9	36811.9	6296.62	23623.8	129220	3606.73
B10	9	42155.1	6806.78	23512.2	133207	3767.49
B11	9	48043.5	7773.52	23954.2	143047	5977.83
B12	9	46265.1	7939.66	23056.4	147634	6159.34
C1	9	37496	6065.21	20751.4	130913	3287.03
C2	9	44115.6	6386.93	29051.2	180405	6096.99
C3	9	37400.9	4898.72	23108.9	131928	2813.57
C4	9	31387	4930.16	22478.1	119742	3321.37
C5	9	31358.4	5200.85	24217.8	125304	3525.72
C6	9	30408.6	5051.1	24642.4	125165	2753.65
C7	9	30471	4908.25	24334.5	123264	2339.99
C8	9	35946.3	6101.34	25157.9	128105	3502.67
C9	9	42554.5	8160.81	25483	128256	4562.69
C10	9	37931.3	7145.31	24377.8	133145	4474.22
C11	9	35474.3	6273.36	22969.5	135651	2912.36
C12	9	44351.1	7145.62	22956.3	147281	3564.62
D1	9	42038.4	6587.54	21582.9	134568	3340.27
D2	9	36718.6	5411.86	23127.8	135870	3054.14
D3	9	43996.4	7539.78	26221.4	136606	5227.73
D4	9	34005.9	6200.87	24652.1	126364	4973
D5	9	35940.1	5658.63	25136.3	125947	2904.9
D6	9	38336.8	6543.39	25343.1	121784	4329.83
D7	9	28098.4	4721.38	23854.6	118201	2693.14
D8	9	28502.3	6368.38	23583.7	116395	2687.97
D9	9	33464.6	5955.78	23374	125624	3659.57
D10	9	47408.4	8427.85	25585	131811	5217.29
D11	9	48119.2	8104.74	25066.9	139580	4088.92
D12	9	135751	17601.3	28547.5	146997	7282.85
E1	9	43800.8	9482.92	22514.3	131011	5565.25
E2	9	42228.7	6798.54	21911.6	124639	3767.03
E3	9	67094.1	8832.7	26015.6	133859	6436.27
E4	9	34095.7	5801.27	24986.4	128886	3273.5
E5	9	29443.5	4942.32	23663.1	120327	3396.75
E6	9	143136	22859.9	34724.6	136233	13198.2
E7	9	45084.2	7976.79	25462.8	119312	7671.05
E8	9	33284.5	6334.43	25717.3	124398	3989.47
E9	9	33860.9	7231.09	26273.6	121991	3761.79
E10	9	37303.5	6384.21	23010.7	122511	4441.84
E11	9	37025.4	6222.17	22318.5	125710	5502.71
E12	9	50237.1	8503.88	23051.2	137497	5309.1
F1	9	46876.7	14423.8	26149.6	142525	9362.33
F2	9	44679.7	6696.49	23012.1	133794	3475.58
F3	9	33865.8	5690.89	25161.4	141565	3056.13
F4	9	34402.3	5848.77	25354.1	132138	3513.38
F5	9	29243.6	4717.64	24738.7	128316	2698.09
F6	9	52250	9870.43	27720.2	128552	6660.94
F7	9	28525.1	4697.67	25611.7	132156	3641.6
F8	9	32419.9	5202.05	24975.7	126924	2557.39
F9	9	33925.7	5522.22	19016.9	96095.6	4429.22
F10	9	35297.2	5918.06	24205.1	133011	4269.24
F11	9	32066.1	5060.63	20286.3	120083	2547.09
F12	9	54664	10020.9	23215.4	134151	5957.89
G1	9	38758.9	9459.56	22502.3	140980	3457.88
G2	9	52327.5	8443.33	25002.6	146876	3831.01
G3	9	39302.7	10474.9	26287	141673	3483.89
G4	9	40770.9	8400.57	25086.8	139145	2949.34
G5	9	30742	5019.64	25578.8	138433	3033.92
G6	9	31042	5271.97	24931.6	130811	3023.41
G7	9	30153.8	5431.29	24940.8	133589	3391.59
G8	9	37460	8911.21	27703.6	142050	4727.83
G9	9	39548.8	6665.68	24673.5	133950	3386.64
G10	9	51369.9	8985.83	25908	140727	3862.66
G11	9	70233.1	12137.8	25942.8	141464	7614.47
G12	9	42868.6	6701.11	23219.7	152619	3313.68
H1	9	55900.1	13513.5	25788.6	155156	10243.8
H2	9	41475.3	7142.24	24494.3	156828	4549.9
H3	9	36540.6	6794.42	24471.8	144069	5384.92
H4	9	34954.9	6540.28	25227	143400	3243.05
H5	9	35429.3	6478.49	26331.1	146600	3696.98
H6	9	44582.8	8054.98	28087.1	151937	4447.1
H7	9	30606.8	7206.49	4304.42	5695.1	3025
H8	9	35012.7	6023.73	3946.96	6496.18	3634.57
H9	9	35180.1	5501.12	3639.95	6096.83	3010.83
H10	9	47203.8	10838.7	8241.54	11197.5	6892.13
H11	9	40316.8	6164.26	4209.56	6411.12	3331.88
H12	9	43734.7	5713.21	3334.76	6079.4	3429.68
A1	10	19174	3760.99	13213.4	93466.9	2875.95
A2	10	33095.1	5005.47	18422.2	121625	3073.8
A3	10	32064	5194.01	20336.1	125607	3027.02
A4	10	34036.7	5132.43	20426.3	119405	3299.38
A5	10	34318	5693.83	21728.4	122760	3243.4
A6	10	47677.5	8567.76	26735.5	142308	5948.86
A7	10	35782	5940.56	23417.1	127046	4169.27
A8	10	194546	31672.2	80545.4	414430	21814.1
A9	10	43513.7	6572.29	22665.5	129777	3586.86
A10	10	32440.9	5576.72	21412.9	131285	4668.28
A11	10	32268	4988.04	20515.3	135883	3248.77
A12	10	57043.8	6608.12	20259.7	139228	4072.24
B1	10	34379.8	5116.5	18094.1	122686	3207.48
B2	10	39902.7	6636.35	21086.5	128014	3974.61
B3	10	32723.4	6356.51	22128.6	126350	3239.02
B4	10	30186.3	4623.61	21777.7	122969	3443.3
B5	10	34053.6	5399.1	25780.5	146817	3979.8
B6	10	27343.4	4349.02	23427.1	126113	2855.93
B7	10	28927	4652.22	23441.6	125578	3239.01
B8	10	109236	17394.6	74197.3	408383	11328.5
B9	10	36469	6084.82	23737.9	129364	3592.92
B10	10	42010.7	6886.78	23539.1	133193	3907.68
B11	10	48119	7760.68	24016.3	143178	6027.48
B12	10	46302.5	8122.53	22912.7	147888	5688.46
C1	10	37839.1	6390.37	20494.5	130554	3727.77
C2	10	43914.9	6727.29	29024.1	179915	5256.62
C3	10	37396.3	5037.5	22909.3	131985	3125.19
C4	10	31687.3	4944.17	22306.4	119511	2981.24
C5	10	31742.1	5020.01	24221.9	125812	3569.85
C6	10	30237.8	4802.74	24525.4	125257	2777.85
C7	10	30906.1	5047.98	24287.7	123343	2531.28
C8	10	35969.3	5755.07	25111.6	128113	3390.31
C9	10	42559.6	8144.29	25366.3	128660	4469.08
C10	10	37914.5	6932.93	24275.8	133186	4368.8
C11	10	35441.4	6439.51	22837.6	136491	3016.17
C12	10	44724.7	7258.46	23022	147258	3846.75
D1	10	42633.2	6673.95	21589.9	134444	3517.24
D2	10	36201.4	5333.53	23177.1	135719	2854.98
D3	10	44254.5	7392.27	26245.7	136807	5383.62
D4	10	34130.9	6066.89	24754.9	126515	5116.81
D5	10	35951.6	5675.64	25112.4	126046	2987.79
D6	10	38376.8	6773.2	25283.7	121686	4380.78
D7	10	28014.9	4870.76	23783.4	118337	2995.62
D8	10	28396	6386.07	23573.4	116822	2363.51
D9	10	33898	5877.98	23541	125542	3761.91
D10	10	47574.4	8409.09	25402.1	132073	5120.53
D11	10	48093.8	8046.68	25076.2	140082	4075.37
D12	10	136197	17899.7	28734.8	147393	7097.03
E1	10	44035	9138.34	22348.5	131424	5887.25
E2	10	41857.4	6712.96	22044.4	124764	3681.51
E3	10	67344.7	8736.03	25844	134688	6432.51
E4	10	33877.8	5695.42	25001.1	129369	3334.53
E5	10	29375.4	4735.32	23721.2	120224	3015.66
E6	10	143171	23117.2	34830.1	136638	13649.2
E7	10	45007.1	7986.62	25316.8	119472	7295.21
E8	10	33219.7	6309.16	25494.8	124832	3921.33
E9	10	33745.4	7261.04	26182	122495	3857.16
E10	10	37258.1	6251.84	22840.9	122273	4315.14
E11	10	36999.9	6409.11	22292.6	125560	5480.73
E12	10	50843.8	8554.87	23150.5	137709	5169
F1	10	46949.4	14273.7	26090.7	142424	9688.96
F2	10	44993.1	6856.93	22986.8	133802	3146.52
F3	10	33821.4	5477.07	25184.4	141501	3109.29
F4	10	34519.7	5823.63	25274.9	132352	3545.56
F5	10	29315.3	4693.35	24482.5	128391	2562.42
F6	10	52378.1	9679.25	27841.7	128268	7038.79
F7	10	28420.8	4742.88	25506.9	132450	3871.62
F8	10	32326.6	5460.98	24951.5	127156	2705.02
F9	10	33784.8	5838.44	19083.1	96213.5	4044.66
F10	10	35284.7	5786.32	23886.3	132852	4475.41
F11	10	32038.2	5027.43	20393.2	120254	2909.25
F12	10	54751.9	9947.15	23306.3	134234	6062.16
G1	10	38659.5	9486.33	22406.3	140971	4174.46
G2	10	52781.8	8388.91	25007	146428	3826.64
G3	10	39756.7	10406.7	26371.9	141889	3191.64
G4	10	38586.8	7365.33	25056.3	139255	2848.06
G5	10	30460.2	4951.51	25535.2	138557	3090.71
G6	10	30836.9	5357.67	25048.2	131397	2874.51
G7	10	29984.6	5245.8	24975.3	133825	3515.51
G8	10	37659.6	8707.3	27768.5	142054	4550.62
G9	10	39414	6684.54	24621.9	133997	3327.07
G10	10	51584.1	9124.64	25754.8	140838	4265.6
G11	10	70569	11910.3	26146.4	141708	7713.63
G12	10	42452.7	6901.31	23182.1	152285	3367.29
H1	10	55836.5	13130.8	25755.5	155139	10812.6
H2	10	41073.9	6710.19	24544.6	156917	4133.76
H3	10	36562.2	7019.74	24440	143948	5127.96
H4	10	35180.2	6232.69	25358.7	143344	3312.88
H5	10	35836.8	6479.99	26374.8	146728	3627.92
H6	10	44948.5	8010.02	27889	152127	4164.13
H7	10	31011.1	7155.37	4294.31	5560.87	2886.09
H8	10	35223.1	6129.31	3987.93	6427.85	3682.45
H9	10	35334.3	5473.96	3573.55	6244.7	3269.83
H10	10	46908.2	10771.2	8203.43	11256.6	6788.55
H11	10	40226.4	6481.56	4193.14	6274.85	3717.62
H12	10	43514.9	5480.77	3572.37	5953.34	3648.53
A1	11	19452	3755.97	13295.1	93154.7	2747.65
A2	11	32980.2	4769.04	18284.3	121359	3221.88
A3	11	31844.1	5347.49	20427.8	125188	2826.97
A4	11	34441.2	5268.41	20756.1	119505	3338.44
A5	11	34668.7	5451.91	21705.7	122621	3511.55
A6	11	47849.2	8398.93	26817.2	142086	5571.17
A7	11	36063.7	5848.14	23237	126992	4007.71
A8	11	193346	31373.4	80793.1	415285	22371.9
A9	11	43601.2	6437.04	22969.8	129775	3960.68
A10	11	32694	5880.04	21683.9	131375	4508.03
A11	11	31834.3	4814.42	20631	135703	3353.31
A12	11	57111.3	6721.21	20204.1	140252	4058.02
B1	11	35143.4	5616.99	18159.6	122649	3593.19
B2	11	39656.6	6437.09	21218.1	128420	3733.52
B3	11	32583.8	6374.4	22422.8	126301	3193
B4	11	30377.1	4453.67	21864.9	122913	3622.31
B5	11	33863.2	5384.02	25861.7	146945	4426.29
B6	11	27254.7	4246.93	23369	126189	2763.45
B7	11	29099.9	4859.39	23507.8	125121	3406.78
B8	11	109213	17791.1	74143.9	408510	11414
B9	11	36946.9	6103.08	23702.4	129404	3346.08
B10	11	41872.7	7018.13	23498.3	133249	3779.33
B11	11	48181.7	7773.52	24017.4	143223	5817.33
B12	11	46584.9	8157.09	22782.9	147606	6169.18
C1	11	37901.7	6084.84	20792.8	131047	3773.75
C2	11	44117.3	6754.52	28907.4	179601	5350.18
C3	11	37599	5146.2	23184.4	131669	2600.95
C4	11	31129.9	5060.55	22299.7	119908	2925.1
C5	11	31368.1	5273.98	24132.1	125470	3574.87
C6	11	30309.2	4830.15	24602.2	125267	2634.42
C7	11	30718.6	5138.5	24246.8	123315	2779.46
C8	11	35677.6	6004.38	25137	128044	3523.34
C9	11	42229.3	8197.34	25510.1	128534	4401.57
C10	11	37828.5	7051.35	24308.8	133621	4090.35
C11	11	36049.8	6376.11	22908.5	136044	3129.93
C12	11	44533.4	7123.06	23063.4	147434	3729.39
D1	11	42769	6555.94	21783.8	134691	3277.75
D2	11	36637.5	5456.79	23183.8	135872	2675.51
D3	11	43979.1	7531.35	25991.9	136790	4959.12
D4	11	33934.7	5955.42	24793.1	126457	5168.62
D5	11	36078.2	5885.39	25091.5	126258	3233.44
D6	11	38187.1	6614.23	25449.2	121479	4173.34
D7	11	28069.5	4621.22	23861	118706	2684.03
D8	11	28547.2	6157.9	23722.5	116900	2807.31
D9	11	34008.2	5888.59	23563.3	126170	3444.35
D10	11	47441.8	8469.11	25461.5	132141	4990.87
D11	11	48152	7902.57	25326.6	139860	4008.64
D12	11	137601	17804.2	28704.5	147414	7637.6
E1	11	44045.8	9492.11	22419.4	131241	5974.31
E2	11	41787.6	6792.04	22077.1	125108	3645.01
E3	11	66890.8	8845.71	26012.8	133958	6496.49
E4	11	34292.3	5811.06	24955.2	128792	3438.77
E5	11	29607.2	4951.17	23656.6	120854	3076.18
E6	11	142865	23184.5	34905.6	136465	13605.2
E7	11	44847.3	7993.76	25427.9	119354	7208.11
E8	11	33465.9	6244.18	25611.7	125013	3912.7
E9	11	33663.1	7488.31	26140.3	122687	3465.37
E10	11	37154.2	6225.19	23124.4	122057	4407.87
E11	11	36986.2	6659.65	22239.1	125846	5548.59
E12	11	50566.3	8352.57	23076.4	137419	5338.95
F1	11	46991	14319.4	26243.8	142927	9503.96
F2	11	44962.8	6993.25	23114.1	134003	3367.26
F3	11	33703.1	5780.35	24930.2	141783	3126.41
F4	11	34431.7	5705.5	25356.7	132388	3427.29
F5	11	29329.6	4669.86	24784.4	128475	2391.14
F6	11	52454.3	9677.74	27842.4	128400	6690.44
F7	11	28551.7	4675.07	25594	132849	3845.23
F8	11	32313.4	5436.73	24919.2	126935	2784.19
F9	11	33802.9	5583.37	19006.1	96303.4	4392.63
F10	11	35338.3	5799.92	23978	133008	4236.92
F11	11	32095.1	4827.22	20232.9	120468	2810.75
F12	11	55065.2	10097.3	23208	134118	5990.99
G1	11	38728.2	9517.33	22555.5	141115	3945.05
G2	11	52570.7	8604.2	24717.5	146741	3836.48
G3	11	39339.6	10635.7	26241	141793	3411.27
G4	11	39013.5	7763.13	25131.8	139095	2929.74
G5	11	30497	4855.5	25537.6	138329	3056.79
G6	11	30918.1	5243.88	24859	131106	2957.15
G7	11	30065.3	5195.28	24907.9	133628	3601.79
G8	11	37354	8748.25	27702.8	142137	4913.52
G9	11	40121.7	6551.7	24595.3	134241	3623.16
G10	11	51462.9	8982.25	25762.9	141019	4186.84
G11	11	70408	11715.4	25947.1	142083	7707.09
G12	11	42698.8	6746	23265.3	152530	3473.37
H1	11	55664.9	13727.1	25492.3	155366	10742.8
H2	11	41083.3	7250.57	24648.7	157214	4229.44
H3	11	36260.3	6862.99	24421.5	144381	4942.48
H4	11	35094.3	6425.66	25354.7	143131	3040.05
H5	11	35598.8	6503.37	26331.9	146499	3411.73
H6	11	44899.8	8081.66	27931.8	152078	4193.2
H7	11	30727.3	7126.27	4298.2	5527.5	2651.94
H8	11	35233.9	6063.58	3928.22	6377.13	3447.34
H9	11	35368.1	5296.96	3691.69	5941.96	3394.95
H10	11	46930.5	10943.5	8255.21	10997.3	6576.41
H11	11	40396.4	6391.89	4032.25	6400.98	3551.82
H12	11	43742.9	5828.69	3333.4	6041.16	2831
A1	12	19113.8	3745.92	13082.9	93212.2	2848.56
A2	12	32985.9	4955.27	18460.5	120937	3310.46
A3	12	31998.8	5088.85	20347.1	125612	3045.78
A4	12	34418.1	5432.04	20696.7	119255	3099.83
A5	12	34568.3	5375.74	21694.3	122769	3469.32
A6	12	47569.6	8562.55	26912.8	141996	5752.17
A7	12	35914.9	5907.83	23369.2	127152	4513.16
A8	12	194381	31285.2	80851.4	415288	20698.4
A9	12	43469.9	6451.28	22614.6	129935	3820.25
A10	12	32994.3	5611.94	21610	131218	4830.74
A11	12	32021.8	4961.69	20632.2	135451	3188.37
A12	12	57043.8	6356.65	20019.1	140300	3793.55
B1	12	34425.9	5130.46	18299.8	122792	3380.04
B2	12	40053.5	6520.36	21136	128847	3654.03
B3	12	33019	6207.02	22290.2	126866	3373.53
B4	12	30491.8	4766.36	21909.6	122670	3175.86
B5	12	33820.3	5422.81	26033.6	146860	4055.82
B6	12	27389.6	4351.73	23377.4	126272	2312.85
B7	12	29534.5	4686.31	23474.2	125371	3367.72
B8	12	109625	17408.1	74540.7	407907	11835.5
B9	12	36581.1	6284.75	23742.6	129336	3248.46
B10	12	42373.2	6696.17	23558.9	133340	4013.32
B11	12	48043.5	7810.87	24184.1	142766	5459.37
B12	12	46774.8	8183.01	22922.4	147155	5883.84
C1	12	38059.4	6233.31	20602.8	131210	3632.44
C2	12	44877.3	6638.8	29005.5	179865	5423.33
C3	12	37607.1	5163.55	23120.5	131415	2955.32
C4	12	31438.8	4971.11	22256.5	119327	3193.96
C5	12	31465.4	5272	24100.1	125394	3999.16
C6	12	30356.5	4900.76	24459	124774	2586.9
C7	12	30656.9	5151.2	24435.5	123111	2646.72
C8	12	35743.3	5947.25	25177.8	128165	3310.32
C9	12	42394	8075.59	25432.3	128277	4565.39
C10	12	37569.5	6988.72	24401.8	133383	4365.82
C11	12	35953.3	6384.86	22898.7	136217	3370.69
C12	12	44307.4	7372.49	23161.4	147010	3412.88
D1	12	42322	6592.81	21739.8	134814	3576.87
D2	12	36253.6	5434.9	23309.2	136135	3072.74
D3	12	43929.3	7486.04	26057.5	136654	5072.89
D4	12	34421.5	5906.32	24649	126016	5375.87
D5	12	36226.7	5644.46	25021.9	126163	3333.3
D6	12	38563.3	6538.21	25572.6	121713	4347.12
D7	12	28179.5	4710.15	23927.6	118275	2975.57
D8	12	28649.4	6225.12	23661.9	116732	2639.49
D9	12	34044.7	6031.8	23665.4	126910	3541.92
D10	12	47477	8586.33	25564.9	132197	5154.39
D11	12	47820.8	8070.53	25118.4	140516	4014.9
D12	12	137792	17919.2	28664.8	147550	7506.43
E1	12	43844.1	9133.75	22299.4	131268	5823.27
E2	12	42016.1	6755.21	22093.9	124988	3879.66
E3	12	66943.4	8785.29	25953.1	133933	6344.99
E4	12	34073.6	5722.11	24897.5	129040	3111.98
E5	12	29680.2	5030.78	23857.6	120454	3265.31
E6	12	143116	22823.6	34792.8	136826	13350.3
E7	12	44977.9	8078.59	25562.6	119362	7717.43
E8	12	33399.3	6412.04	25608.9	124302	3897.34
E9	12	33444.4	7567.59	26366.2	122514	3363.45
E10	12	37147.2	6476.61	22988.1	122209	4460.2
E11	12	36954.9	6267.46	22449.6	126145	5821
E12	12	50993.8	8428.64	23091.9	137059	5581.85
F1	12	46852.9	14378	26249	142946	9669.82
F2	12	45134.2	6856.93	22965.6	133944	3091.34
F3	12	34181.6	5397.44	24948.8	141370	2848.91
F4	12	34216.8	5938.41	25303.8	132495	3429.03
F5	12	29320.6	4660.15	24807.7	128716	2730.31
F6	12	52548.5	9464.64	27909.4	128545	7010.09
F7	12	28360.4	4959.56	25750.4	133156	3448.67
F8	12	32414.7	5412.48	24905.5	127030	2873.25
F9	12	33668.1	5840.85	18930.8	96189.6	4155.26
F10	12	35444	5874.72	24132.2	133070	4192.37
F11	12	32013.3	4917.77	20168.6	120430	2817.72
F12	12	54678.6	10406.2	23289.9	134175	6047.26
G1	12	38444.6	9511.7	22423.1	141197	4075.22
G2	12	52867.6	8277.72	24708.7	146548	4030.11
G3	12	39355.8	10494	26356	141665	3120.8
G4	12	41783.1	8556.3	25089.2	139409	3062.87
G5	12	30557.6	4974.74	25490.1	138754	2986.59
G6	12	30816.2	5312.3	25134.7	130974	2679.46
G7	12	29962	5223.18	25003.6	133528	3459.82
G8	12	37692.6	8900.56	27633.7	142007	4433.61
G9	12	39309.8	6688.82	24655.5	134053	3310.43
G10	12	51434.8	9252.7	25763.8	141002	4111.75
G11	12	70749.8	12048.8	26114.8	141824	7439.04
G12	12	42601.2	6739.94	23276.7	152534	3805.31
H1	12	55813.4	13461.9	25588.4	155613	11113.3
H2	12	41537.1	6743.33	24689.7	156962	4074.97
H3	12	36479.1	6802.04	24488.3	144137	5022.27
H4	12	35300.1	6535.34	25395.4	143649	3139.93
H5	12	35825.6	6446.07	26439.9	146462	3539.34
H6	12	44812.1	8011.54	27826.7	152088	4559.52
H7	12	31167.6	6988.63	4312.2	5583.37	3025
H8	12	34958.6	5935.63	3967.8	6548.31	3779.64
H9	12	35461.6	5472.21	3666.68	6123.95	3216.45
H10	12	47044.3	10758.1	8330.45	11471.9	6813.45
H11	12	40033.4	6433.27	4056.33	6220.8	3693.94
H12	12	44014	5892.35	3437.95	5926.43	3409.91
A1	13	18976.7	3558.38	13274.7	92955.9	2786.57
A2	13	32667.7	4660.55	18508	121254	3707.66
A3	13	32104.7	5371.64	20500.3	125655	2788.21
A4	13	34619.1	5302.98	20616.9	119238	3387.01
A5	13	34418.3	5506.47	21695.3	122825	3451.64
A6	13	48337.9	8408.31	26912.8	141605	5643.36
A7	13	36063.7	6008.9	23388.7	127104	4367.67
A8	13	193872	31427.5	81005.9	414886	21795.7
A9	13	43921.3	6545.85	22752	129824	3592.8
A10	13	33058.6	5943.66	21499.1	131333	4532.34
A11	13	32239.4	5035.93	20391.5	135843	3303.36
A12	13	56489.3	6695.91	20161	139956	4046.64
B1	13	34871.3	5194.27	18274.3	123078	3784.36
B2	13	39989.6	6588.76	21145.9	128140	4104.92
B3	13	32271.7	6458.72	22367.2	126350	3519.85
B4	13	30189.8	4852.47	21827	123012	3689.17
B5	13	33782.9	5209.47	25918.2	146630	4035.31
B6	13	27302.8	4147.56	23380.2	126080	2641.96
B7	13	29147.9	4848.02	23299.4	125388	3471.58
B8	13	109030	17553.7	74422.5	409197	11612.5
B9	13	36769.8	6045.56	23707.1	129457	3430.82
B10	13	41895.2	6680.36	23461.6	133276	3740.83
B11	13	48481.1	7852.9	23986.4	143199	5502.1
B12	13	47031.2	8469.55	23013.6	147033	6395.48
C1	13	38102	6419.82	20700.7	131171	3559.55
C2	13	43820.5	6500.95	29000.5	180251	5156.25
C3	13	37374.2	4901.04	23132.2	132009	2681.95
C4	13	31645	5088.57	22391.7	119474	3214.48
C5	13	31456.8	5151.44	24136.2	125457	3746.39
C6	13	30337.3	4782.81	24503.5	125126	2661.2
C7	13	30717.8	5154.38	24203.4	123218	2485.11
C8	13	35629	5916.08	25163.3	128003	3794.78
C9	13	42425.4	8023.41	25417.9	128226	4369.16
C10	13	37695	6833.11	24382.8	133311	4508.03
C11	13	35676.4	6112.67	23049.1	136225	2618.58
C12	13	44854.3	7013.78	22994.3	146847	3721.1
D1	13	42359.5	6640.23	21728.8	134604	3122.91
D2	13	36128.4	5444.12	23303.6	136045	2955.65
D3	13	43936.4	7676.75	26072.3	137046	4887.5
D4	13	33978.9	6216.21	24726.3	126558	5240.52
D5	13	36100.1	5768.23	25012.9	126111	2804.05
D6	13	38374.4	6490.69	25302.9	121402	4306.17
D7	13	28071.1	4761.1	23831.8	118702	2708.63
D8	13	28488.2	6076.54	23675.9	116700	2299.18
D9	13	34221.2	5573.87	23661.7	127297	3450.09
D10	13	47534.5	8353.76	25516.1	131722	4930.88
D11	13	47717.1	7996.92	25223.6	139789	4197.35
D12	13	138242	18163	28737.7	147517	7176.52
E1	13	44599.5	9308.33	22394.3	131528	5786.56
E2	13	41803.4	6742.21	22115	124813	3815
E3	13	66864.1	8901.48	26049.2	134198	6533.19
E4	13	34158.5	5723.89	24873.6	128935	3490.42
E5	13	29336.5	5021.94	23801.4	120464	2987.29
E6	13	143143	23093.9	34808.2	136525	13435.6
E7	13	44825.4	8072.34	25464.6	119156	7426.8
E8	13	33176.4	6147.62	25447.7	124747	4062.41
E9	13	33506	7420.48	26248.2	122330	3649.58
E10	13	37054.6	6274.94	23171.4	121863	4591.49
E11	13	36863	6344.55	22162.5	126183	5739.76
E12	13	51317.9	8622.58	23074	137234	5554.49
F1	13	47219.5	14413.8	26183.6	142856	9491.2
F2	13	45024.5	7056.16	22884.8	134021	3105.65
F3	13	33916.2	5716.83	25164.1	141544	3076.85
F4	13	34448.3	5754.93	25139.4	132161	3403.81
F5	13	29059.4	4756.51	24657.2	128577	2533.59
F6	13	52448.1	9738.95	27858.8	128421	6872.19
F7	13	28471.8	4848.88	25644	133815	3735.58
F8	13	32446.3	5461.76	24895.8	126999	2405.65
F9	13	33942.2	5721.77	18921.7	96557.4	4709.98
F10	13	35233.5	5812.67	24016.6	133045	4342.63
F11	13	32425	4858.41	20368.5	120194	2720.21
F12	13	55126.6	10400.2	23236.7	134192	6084.5
G1	13	38932.9	9508.88	22446.5	140691	3656.35
G2	13	53091.8	8410.21	24761.7	146533	4298.13
G3	13	39544.5	10471.3	26474.4	142026	3034.9
G4	13	41558.5	8463.51	25174.3	139191	2959.96
G5	13	30580.4	4856.27	25621.6	138485	2951.88
G6	13	31006.7	5557.89	24893.5	131123	2902.06
G7	13	29976.1	5044.47	25090.2	133602	3283.34
G8	13	37541.3	8778.54	27837.6	142175	4710.02
G9	13	39670	6427.44	24613.3	134221	3110.7
G10	13	51237.3	9207.03	25831.8	140847	4291.24
G11	13	70818.1	12006	25953.7	141825	7714.72
G12	13	43017.1	6827.3	23070.5	152633	3775.65
H1	13	55649.5	13730.6	25585.3	155120	10945.9
H2	13	41271.2	7277.34	24488.5	156739	4463.45
H3	13	36459.7	7101.37	24486.2	144258	4974.6
H4	13	35343.9	6557.6	25326.7	143497	3405.44
H5	13	35905.9	6455.87	26426.6	146674	3444.76
H6	13	45302.2	7923.9	28019.5	151856	4364.5
H7	13	31022.4	7091.66	4283.41	5733.12	2760.68
H8	13	34794.3	5990.17	4012.24	6444.76	3656.01
H9	13	35256.3	5409.99	3644.26	6336.57	3157.83
H10	13	46977.3	10910.3	8237.63	11329.7	6736.76
H11	13	40506.2	6414.88	4114.34	6193.77	3678.15
H12	13	44060.2	5765.03	3649.77	5787.61	3661.24
A1	14	19200.3	3292.13	13021.6	93277.4	2436.27
A2	14	32846.6	4837.06	18238.4	121020	3542.96
A3	14	31624.2	4862.9	20527.6	125755	2888.24
A4	14	34651.1	5453.93	20696.7	119140	3074.49
A5	14	34832.2	5414.85	21732.6	122522	3422.17
A6	14	48352.2	8484.39	26962.2	142120	5786.7
A7	14	36030.5	5941.52	23183.1	126724	4304.37
A8	14	194452	31623.9	80857.2	414817	21651.7
A9	14	43754.3	6285.52	22842.6	130006	3908.27
A10	14	32705.8	5600.58	21551.8	131220	4824.11
A11	14	31666.9	5177.21	20509.5	135816	2924.71
A12	14	56728.3	6567.94	20161	139814	4146.17
B1	14	34360.1	5016.8	18403.5	122994	3684.54
B2	14	39987.9	6248.25	21204	128196	3642.3
B3	14	32524.9	6343.73	22151.3	126376	3518.67
B4	14	30112.6	4475.19	21903.9	122981	3302.03
B5	14	33910.5	5069.4	26071.2	146786	4025.65
B6	14	27326.8	4254.16	23511.4	125975	2683.67
B7	14	28795.7	4629.49	23507.8	125415	3069.47
B8	14	110011	17410.7	74084.7	408265	11120.8
B9	14	36651	6421.7	23721.1	129266	3810.28
B10	14	42243.8	6737.65	23648.3	133191	3581.88
B11	14	48342.9	7634.6	24119.7	143382	5629.11
B12	14	47289.2	8386.04	23012.2	146972	6319.58
C1	14	37998.1	5952.32	20762.9	131179	3759.17
C2	14	43767.4	7232.73	29047.8	179911	5350.18
C3	14	37483.2	5168.18	23108.9	131948	3242.19
C4	14	31153.2	4912.92	22512.4	119638	2927.26
C5	14	31699.7	5065.47	24091.8	125709	3569.85
C6	14	30373.4	4824.34	24583.9	125244	2362.25
C7	14	30791.9	5089.27	24161.6	122981	2581.58
C8	14	35894.2	6003.52	25233.2	128295	3595.24
C9	14	42386.4	8113.85	25505.6	128396	4557.29
C10	14	37550.7	6800.81	24207.9	133166	4043.6
C11	14	35822.8	6187	22844.2	136548	3201.71
C12	14	44890.3	6837.99	23229.4	147338	3766.14
D1	14	42612.3	6700.29	21940.7	134653	3142.14
D2	14	36479.7	5303.58	23238.7	136215	2595.63
D3	14	44127.5	7537.67	26187.5	137143	5095.01
D4	14	33822.1	6065.87	24659.6	126432	5018.47
D5	14	36224.1	5697.37	25116.4	126197	2874.95
D6	14	38472.9	6653.97	25330.3	121975	4540
D7	14	28197.2	4796.5	23878.3	118632	2743.25
D8	14	28416.8	6137.56	23732.8	117086	2748.58
D9	14	34252.1	6060.98	23629.2	127930	3818.34
D10	14	47702.3	8424.1	25599.4	131826	5220.19
D11	14	48002.8	8236.42	25091.6	140016	4306.82
D12	14	138630	18100.6	28828.5	147513	7581.95
E1	14	44615.1	9260.09	22433.6	131293	5983.75
E2	14	42015	6760.63	22122.4	125040	3559.49
E3	14	66882.8	8904.26	25903.7	134349	6255.6
E4	14	34015.7	5720.33	24792.1	128928	3458.49
E5	14	29565.1	4854.75	23754.4	120815	3056.32
E6	14	142542	22985.1	34594.5	136315	13516.3
E7	14	45025	7991.08	25596.5	119376	7571.64
E8	14	33368.5	6254.11	25541.9	124718	4295.62
E9	14	33776.1	7416.08	26173.9	122671	3457.89
E10	14	37316.6	6499.71	23221	122556	4066.33
E11	14	36823.9	6466.93	22527.1	126210	5947.17
E12	14	51376.5	8554.03	23205	137138	5356.36
F1	14	47063.7	14496.7	26078.9	142756	9662.16
F2	14	45228.2	7073.99	23165.6	134456	3736.18
F3	14	34187.7	5608.58	24994.9	141740	3173.26
F4	14	34407.1	5960.19	25316.6	132512	3346.41
F5	14	29127.4	4637.47	24688.8	128720	2515.79
F6	14	52239.6	9769.93	28041.1	128303	6961.47
F7	14	28564.6	4809.13	25676.2	134189	3114.77
F8	14	32442.6	5405.44	24973.3	126874	2385.03
F9	14	33814.9	5802.23	19026.8	96451.1	4371.36
F10	14	35135.4	5929.96	24004.6	132802	4291.96
F11	14	31967.8	4906.7	20406.1	120701	2955.02
F12	14	54596.2	10212.3	23253	134080	6087.81
G1	14	39136.2	9393.33	22490.6	141133	4030.11
G2	14	52880.7	8563.98	24817	146549	3552.06
G3	14	39594	10398.5	26439.1	142041	3417.47
G4	14	41751.8	8656.36	25272.2	139566	3200.91
G5	14	30590	4985.58	25457.4	138510	2838.28
G6	14	31106.6	5449.86	24765.2	131234	2819.42
G7	14	29974	5288.78	25013.6	133439	3427.67
G8	14	37561.3	8629.5	27593.8	141963	4665.09
G9	14	39625.9	6407.73	24597.9	133986	3299.04
G10	14	51290	9195.38	25853.3	140730	4228.97
G11	14	70635.1	12006	26090.9	142192	7529.48
G12	14	42634.6	6646.51	23235.7	152357	3504.17
H1	14	55626.4	13485	25361.5	154626	10817.2
H2	14	41320.9	7202.14	24881.5	157059	4080.74
H3	14	36300.2	6803.12	24425.6	143946	5021.23
H4	14	35299.3	6447.92	25362.7	143402	3292.58
H5	14	35937.9	6391.78	26425.9	146685	3509.32
H6	14	45356.2	8141.1	28004.5	152015	4411.92
H7	14	31068.8	7261.54	4255.41	5618.28	2834.5
H8	14	34978.9	5926.54	3897.66	6594.8	3515.23
H9	14	35145.4	5448.55	3683.93	6359.32	3202.45
H10	14	47038.2	10932.4	8165.32	11585.1	6899.1
H11	14	40386.8	6596.52	4173.44	6675.76	3409.7
H12	14	43876.8	5806.48	3473.25	5990.17	3808.08
A1	15	19168.3	3757.65	13137.9	93084.8	2864.42
A2	15	32769.4	4853.25	18247.5	121669	3021.21
A3	15	32386.5	5225.27	20427.8	125981	2918.25
A4	15	35170.7	5252.27	20649.9	119159	3282.48
A5	15	35103.9	5449.86	21839.3	122329	3478.16
A6	15	48348.9	8530.24	26743.1	142054	5432.03
A7	15	36235.1	6026.23	23363.3	126818	4186.27
A8	15	194907	32144.7	80635.8	413998	21881.5
A9	15	43749.7	6624.15	22793.7	129604	3998.26
A10	15	32871.1	5956.15	21649.2	131079	4710.28
A11	15	31834.3	4974.86	20348.7	136065	2906.12
A12	15	56332.4	6596.22	20262.5	139105	4689.33
B1	15	34689.2	5616.99	18365.3	122974	3380.04
B2	15	39482.8	6367.21	21089.3	128340	4138.8
B3	15	32746.6	6540.5	22191.7	126333	2929.87
B4	15	30207.4	5048.47	21822.4	122833	3574.86
B5	15	33799.4	5306.44	25959.4	146583	4393.7
B6	15	27258.4	4265.9	23410.2	126190	2628.36
B7	15	29503.7	4728.27	23313.9	124886	3430.74
B8	15	109978	17308.3	74650.5	407601	11123.8
B9	15	36450.8	6239.11	23488.2	128830	3618.71
B10	15	42234.2	7021.1	23556.9	133481	3912.62
B11	15	48386.4	7897.26	23979.5	142937	5833.49
B12	15	47271.4	8259.32	22842.3	146979	5982.23
C1	15	38174.6	6167.05	20874.6	131283	3433.94
C2	15	44348.9	6928.11	28854.9	179918	5406.32
C3	15	37641.9	5054.84	23028.9	131576	3121.82
C4	15	31513.9	4942.01	22173.4	119559	2955.33
C5	15	31816.3	5100.05	24103.2	125599	3659.13
C6	15	30261.1	5158.26	24466	124842	2480.62
C7	15	30552.7	5136.11	24283.5	123185	2697.84
C8	15	35657.1	5886.65	25228.6	127595	3517.95
C9	15	42530.7	8086.02	25380.8	128120	4466.38
C10	15	37733.6	7067.01	24312.8	132918	4099.3
C11	15	35694.5	6305.06	22895.4	136310	3101.21
C12	15	44886.4	7210.95	23240.9	146939	3978.34
D1	15	42602.3	6975.3	21685.8	134721	3164.26
D2	15	36679.2	5533.97	23275.6	135993	2673.33
D3	15	44022.8	7349.07	26196	136247	4987.56
D4	15	34145.4	6040.3	24810	125988	4989.92
D5	15	36029.8	5900.51	25015.9	125889	2925.87
D6	15	38386.4	6565.85	25386.1	121478	4579.12
D7	15	28207.6	4650.57	23651.9	118487	2658.52
D8	15	28495.7	6025.25	23736.5	116259	2464.21
D9	15	34074.6	6001.75	23681.2	127637	3635.65
D10	15	47562.3	8546.95	25356.1	131255	5068.28
D11	15	48478	8209.46	25176.1	140268	3778.24
D12	15	139013	18253.7	28891.8	147564	7403.09
E1	15	44844.5	9218.74	22569.9	131099	5786.56
E2	15	41872.2	6812.62	22064.4	124954	3481.27
E3	15	67090.6	8906.12	25992.3	133750	6421.21
E4	15	34133.2	5731	24953.4	128496	3467.88
E5	15	29627.5	4794.59	23725.8	120448	2890.83
E6	15	143332	23074.9	34743.7	136593	13387.9
E7	15	45224.6	8113.42	25581.4	118771	7719.33
E8	15	33174.7	6322.7	25566.5	124734	4063.37
E9	15	33512.6	7415.2	26283.6	122262	3510.25
E10	15	37450.3	6383.33	23038.7	122160	4395.01
E11	15	36483.4	6352.26	22253.4	126073	5746.45
E12	15	51517	8618.4	23178.9	137056	5412.73
F1	15	47541.5	14625.3	26009.6	142920	9447.82
F2	15	45345.3	6788.77	23170.6	134264	3332.51
F3	15	34233.8	5441.28	25040	141561	2976.84
F4	15	34511.7	5625.07	25374.5	132407	3201.18
F5	15	29171.9	4786.47	24848.4	128501	2429.3
F6	15	52493.1	9647.51	27840.1	128619	6744.64
F7	15	28393.5	4862.13	25949.5	134513	3490.72
F8	15	32201	5545.46	24936.1	126927	2780.89
F9	15	33781.8	5880.28	19086.4	96393.3	4390.93
F10	15	35381.9	5760.83	24061.1	132925	4137.33
F11	15	31904.7	5005.3	20471.4	120240	3134.11
F12	15	55137.6	10244	23157.2	133821	5973.61
G1	15	39077.7	9634.29	22480.2	140939	3527.47
G2	15	52976.1	8381.82	24792.6	146724	4109.97
G3	15	39554.4	10653	26327.7	141766	3379.39
G4	15	40172.8	8029.4	25049.1	139234	2843.98
G5	15	30323.6	5039	25493.2	138285	3250.85
G6	15	31002	5289.25	24932.4	130954	2608.73
G7	15	29836.7	5206.59	24886.4	133088	3318.64
G8	15	37545.9	8860.43	27816	142017	4605.73
G9	15	39641.2	6501.14	24635.7	133922	3299.04
G10	15	51254	9061.05	25714.5	140806	4156.62
G11	15	70943.3	12213.2	26231.3	142046	7757.22
G12	15	42696.1	6908.59	23274.4	152326	3584.02
H1	15	55614.8	13323.1	25413.5	154921	10589.4
H2	15	41428.3	7404.79	24531.8	156978	4367.77
H3	15	36250.6	6939.19	24388.7	144015	5219.14
H4	15	35182.6	6477.61	25460.8	143437	3208.95
H5	15	35929	6385.75	26534.7	146506	3549.1
H6	15	45374.9	8441.38	28115.6	152023	4352.27
H7	15	30768.5	7032.68	4336.32	5570.95	2925.78
H8	15	34873.4	6067.78	3996.96	6389.81	3646.72
H9	15	35271	5412.62	3686.51	6052.2	3359.08
H10	15	47383.7	11025.1	8339.24	11427.9	6592.35
H11	15	40713.7	6591.92	4189.86	6388.59	3665.74
H12	15	44253.6	5691	3626.68	5896.68	3575.11
A1	16	19500.9	3499.77	13232.3	92730.7	2818.29
A2	16	32562.3	5020.05	18537.1	121530	3068.26
A3	16	31946.7	4887.06	20557.7	126284	2853.23
A4	16	35083.7	5391.71	21041.3	119182	3002.7
A5	16	35145.7	5488.97	21783.4	122669	3412.35
A6	16	48580.1	8595.9	26820.4	142007	6054.53
A7	16	36319.7	5883.76	23480.8	126753	4227.84
A8	16	196164	32326.8	80898.1	414179	22050.1
A9	16	43980	6465.51	22992.2	129894	3868.71
A10	16	33090.1	5831.19	21705.1	131562	4511.34
A11	16	32083.4	4898.24	20620.6	135853	3327.75
A12	16	56555	6889.35	20087.3	139447	4156.13
B1	16	34474.2	5577.11	18490.9	122429	4085.48
B2	16	40081.4	6660.14	21189.8	128438	3823.44
B3	16	32548.2	6422.95	22422.8	126480	3596.55
B4	16	30326.8	4806.02	21854.6	122694	3459.48
B5	16	33787.3	5045.7	25893.5	146961	4114.95
B6	16	27026.6	4337.27	23320.2	126015	3104.35
B7	16	29302.7	4629.49	23553.1	125168	3434.29
B8	16	110682	17934	74318.4	408833	11322.4
B9	16	36587.8	6204.42	23514.4	129234	3631.6
B10	16	42007.5	6734.68	23406	133275	3810.93
B11	16	48048.6	7831.89	24215.1	143112	5705.32
B12	16	47112.3	8266.52	22925.2	147379	5904.93
C1	16	38237.2	6212.45	20754.8	130916	3606.65
C2	16	44263.2	7309.32	29303.4	179751	5062.68
C3	16	37385.8	5164.71	23119.4	131901	3203.94
C4	16	31397.5	4995.89	22409.4	119737	3065.47
C5	16	31661.1	4964.67	24194.1	125790	3590.92
C6	16	30443.1	4850.92	24420.6	125022	2716.5
C7	16	30575.1	5240.12	24268.5	123195	2650.01
C8	16	35743.3	5969.76	25151.5	128024	3667.15
C9	16	42713.3	8243.43	25384.4	128301	4270.15
C10	16	37856.1	6989.7	24363.8	132880	4302.17
C11	16	35343.8	6326.92	23014.2	136400	2816.27
C12	16	44874.9	7107.62	23065.7	147081	3728.21
D1	16	42791	6743.49	21770.8	134721	3176.77
D2	16	36890.3	5626.12	23307	136285	2932.67
D3	16	44330.7	7303.76	26318.7	137081	4763.2
D4	16	33904.8	6007.57	24732.7	126283	5458.35
D5	16	36145.9	5873.11	24727.3	125956	3083.65
D6	16	38477.7	6820.71	25413.5	121533	4234.3
D7	16	28106.5	4751.6	23802.5	118536	3034.79
D8	16	28787.2	6154.37	23761.6	116684	2406.4
D9	16	34376.3	6116.67	23745.2	128836	3943.65
D10	16	47262.8	8672.61	25519.9	132232	5213.42
D11	16	48098.1	8104.74	25177.2	140325	4033.66
D12	16	139157	18468.2	29014.8	148137	7522.33
E1	16	44489	9237.12	22480.5	131516	5845.3
E2	16	42110.2	6862.45	21954.8	124926	3797.27
E3	16	67181.5	8582.67	25949.4	134130	6496.49
E4	16	34259.6	5832.41	24897.5	128775	3365.52
E5	16	29600.8	4903.4	23769.1	120396	2960.81
E6	16	142833	22966.1	34752.8	136807	13349.4
E7	16	45470.4	7928.57	25313	119478	7738.26
E8	16	33319.5	6287.5	25568.3	124627	4027.86
E9	16	33949.9	7438.1	26179.3	122360	3770.2
E10	16	37271.2	6254.5	23223.7	122154	4714.52
E11	16	36848.3	6636.53	22436.2	125913	5900.34
E12	16	51646.3	8539.82	23110.6	137003	5474.91
F1	16	47356	14258	26233.3	142919	9413.37
F2	16	45163.5	6918.79	23120.1	134446	3468.43
F3	16	34084.1	5562.95	25047.1	141705	3125.51
F4	16	34573.6	5690.42	25258.7	132452	3343.8
F5	16	29285.9	4630.18	24661.3	128441	2278.37
F6	16	52340.7	9740.46	27921.1	128497	6891.32
F7	16	28692.6	4844.99	25835.1	135072	3471.76
F8	16	32451.4	5311.57	24852.2	127033	2750.37
F9	16	34237.5	5811.89	19028.5	96444.5	4402.84
F10	16	35184	5904.46	24056.8	133204	4346.12
F11	16	31869.6	5019.38	20450.6	120446	2501.32
F12	16	55053.3	10327.2	23215.4	133811	6131.66
G1	16	39352.5	9487.74	22546.4	141007	3838.08
G2	16	52982.1	8498.92	24979.4	146613	3941.5
G3	16	39782.7	10437.6	26442.6	141874	3246.55
G4	16	41749.5	8624.08	25190.3	139365	3085.74
G5	16	30524.4	5012.68	25597.5	138442	2874.57
G6	16	31018.7	5524.76	24801.9	131325	2995.12
G7	16	29969.1	5267.67	25022	133143	3444.14
G8	16	37526	8749.88	27653.7	142044	4649.82
G9	16	39383.5	6591.98	24495.5	134165	3369.12
G10	16	51397.1	9147.92	25711.8	140852	4032.08
G11	16	70790.3	12211	26063.6	142043	7546.92
G12	16	42744.3	6703.54	23313.1	152214	3893.14
H1	16	55682.3	13271.4	25371	154696	10722.7
H2	16	41735.7	6993.13	24541.1	156648	4329.73
H3	16	36137.4	7052.39	24376.4	143957	4864.77
H4	16	35386.8	6416.59	25288.4	143316	3296.64
H5	16	36082.9	6486.03	26436.2	146645	3597.89
H6	16	45787.8	8434.53	28013.5	151914	4271.2
H7	16	31026.9	7127.84	4232.07	5689.67	2917.05
H8	16	35022.9	6047.5	3963.63	6637.77	3568.11
H9	16	35192.2	5443.29	3550.26	6144.07	3237.45
H10	16	47077.8	10932.4	8282.57	11266.6	6648.12
H11	16	40312	6616.06	4047.57	6525.98	3732.29
H12	16	43959.4	5637.71	3585.95	6068.07	3774.2
A1	17	18873.3	3300.5	13037.3	92909.3	2815.41
A2	17	32673.4	4845.15	18554	121787	3043.35
A3	17	32340.9	4972.32	20638.4	125987	2865.73
A4	17	36284.3	5468.91	20712.7	119488	2902.39
A5	17	35418.5	5374.71	21716	122508	3540.04
A6	17	48847.5	8596.94	26961.2	141977	5832.73
A7	17	36258.6	6044.52	23362.3	126881	4080.46
A8	17	195413	31749.1	80944.7	414060	22047
A9	17	44030.7	6442.12	22900.6	129872	3815.31
A10	17	32771.4	5814.15	21573	130769	4454.98
A11	17	31482.2	4917.39	20347.6	135666	3261.55
A12	17	56702.7	6679.54	20076.1	139502	4147.59
B1	17	34526.8	5756.56	18325.3	122969	3462.93
B2	17	39874.8	6419.25	21335.6	128663	4343.4
B3	17	32619.3	6327.12	22174.1	126851	3369.99
B4	17	30352.5	4897.79	21885.5	122720	3612.61
B5	17	34145	4954.12	25784	146774	4207.87
B6	17	27266.8	4171.95	23319.3	126031	2763.45
B7	17	29259.3	4851.52	23413.6	125389	3422.76
B8	17	108821	17373	74580.1	407809	10210.6
B9	17	36853.1	6303.01	23701.5	129079	3417
B10	17	42435.3	6883.82	23483.4	132993	3883
B11	17	48519.4	7758.34	24035.8	143362	5718.02
B12	17	47608.9	8377.4	23055	147103	6038.46
C1	17	37940.5	6227.18	20625.8	131216	3651.51
C2	17	43830.8	7207.21	29184.9	180062	5324.66
C3	17	37725.3	5022.46	23074.1	131657	2741.58
C4	17	31527.6	4762.05	22319.7	119507	3087.06
C5	17	31650.5	5067.44	23940	125443	3734.35
C6	17	30414.3	4823.51	24534.1	125091	2524.69
C7	17	30866	5267.91	24293.6	123082	2665.68
C8	17	35816.6	6031.22	25217.8	127795	3482.89
C9	17	42501	7988.62	25395.2	128404	4150.44
C10	17	37783	6790.05	24286.8	133306	4296.21
C11	17	35589	6604.57	23005.5	136362	3309.95
C12	17	45141.9	7003.09	23080.7	146890	3812.37
D1	17	43174	6789.85	21834.8	134747	3526.85
D2	17	36514.5	5394.58	23294.7	136160	3012.55
D3	17	44132.5	7416.5	26239.4	136776	5176.11
D4	17	34089.6	6028.03	24592.8	126305	5197.17
D5	17	36219.7	5724.77	24855.7	126407	2747.13
D6	17	38420.8	6571.04	25264.5	121561	4449.92
D7	17	28063.1	4810.31	23935.9	118831	2693.14
D8	17	28362	6193.28	23699.2	116829	2572.36
D9	17	34724.8	5898.31	23775.8	128829	3682.52
D10	17	47183.1	8588.21	25474.9	131888	5299.53
D11	17	48188	8117.19	25122.6	140078	3993
D12	17	138988	18320	29009.1	147631	7428.92
E1	17	44915.4	9354.28	22538.3	131325	5926.06
E2	17	41918.8	6872.2	22021.2	124903	3485.44
E3	17	67049.6	8777.86	26002.5	134332	6347.82
E4	17	34300.4	5897.34	24865.4	128666	3547.7
E5	17	29433.8	4748.59	23787.5	120719	3106.44
E6	17	143109	22978.2	34725.5	136321	13031.3
E7	17	45024.2	7958.04	25633.2	119540	7791.27
E8	17	33354.4	6344.36	25590	124978	4024.98
E9	17	33765.3	7242.55	26159.4	122689	3919.81
E10	17	36907	6388.66	23129.8	122298	4070
E11	17	37097.8	6388.87	22419	126232	5924.23
E12	17	51734.2	8759.67	23237.5	136791	5223.71
F1	17	47215.1	14186.5	26212.4	142880	9256.44
F2	17	45482.1	7179.9	23028.2	134062	3641.14
F3	17	34290.3	5683.73	25077.3	141571	3057.03
F4	17	34421.4	5635.12	25176.9	132673	3384.67
F5	17	29217.9	4771.89	24702.9	128621	2451.35
F6	17	52328.3	9679.25	27930.5	128658	6881.75
F7	17	28994	5100.64	25912.5	135546	3690.24
F8	17	32380.9	5432.03	24909.5	126867	2593.68
F9	17	34392.7	5804.64	18911.8	96501.4	4427.52
F10	17	35147.2	5814.37	24068	132988	4323.41
F11	17	32051.6	4779.93	20266.5	120469	2950.05
F12	17	55059.7	10123.9	23331.6	134092	6108.49
G1	17	39025	9537.06	22476.3	140879	3912.83
G2	17	53270.6	8614.84	24804.8	146755	4231.4
G3	17	39946.3	10409.5	26385.1	141938	3144.71
G4	17	41609.4	8665.23	25098.1	139213	3113.51
G5	17	30332.5	5031.26	25495.5	138425	3268.21
G6	17	31040	5346.87	24945.6	131246	2774.01
G7	17	30267	5232.23	24906.3	133503	3282.56
G8	17	37592	8930.04	27699.5	141685	4842.29
G9	17	39420	6553.42	24635.7	134254	3378.76
G10	17	51662.2	9303.74	25774.5	141160	4246.37
G11	17	71216.7	12147.9	26125.7	141935	7599.22
G12	17	42526.3	6739.94	23089.9	152297	3515.58
H1	17	55977.2	13118.4	25292.2	154907	9854.71
H2	17	41135.7	7152.44	24704.9	156442	4130.3
H3	17	36167.5	6815.1	24528.3	143981	5092.73
H4	17	35223.9	6485.03	25428.1	143742	3213
H5	17	36032.3	6550.86	26504.3	146713	3666.2
H6	17	45746.6	8320.97	28076.6	152106	4271.2
H7	17	30851.6	7179.75	4257.74	5503.45	2995.63
H8	17	35040.5	5984.57	4014.32	6635.66	3648.86
H9	17	35366.3	5440.66	3627.87	6094.2	3023.08
H10	17	46980.3	11015	8196.59	10963.2	6602.31
H11	17	40037	6373.49	4189.86	6408.86	3462.71
H12	17	44033.8	5455.61	3630.76	5930.68	3409.91
A1	18	18954.1	3652.15	13073.5	92827	2924.97
A2	18	32824	4942.32	18405.4	121247	3017.05
A3	18	32305.1	5222.43	20411.4	126270	2741.95
A4	18	36633.7	5858.4	20697.9	119352	2976.3
A5	18	36693.9	5896.63	21883.9	122320	3276.8
A6	18	50165	8980.46	27000.9	141739	5832.73
A7	18	36010.2	6100.36	23507.2	126814	4509.38
A8	18	195443	31493	80714.5	415109	21568.9
A9	18	43864.9	6477.72	22763.2	129730	3701.58
A10	18	32771.4	5959.56	21486.8	131095	4627.39
A11	18	31901.6	4968.88	20535	135821	3215.09
A12	18	56421.8	6801.56	20184.6	139196	4544.3
B1	18	34728.7	5670.82	18496.4	123001	3718.38
B2	18	40324.2	6469.81	21226.6	128578	3569.33
B3	18	32956	6491.94	22339.4	126438	3301.56
B4	18	30332.6	4890.99	21902.7	122753	3391.54
B5	18	33898.4	5474.52	25869.9	146583	4211.49
B6	18	27063.5	4092.45	23473	125903	2713.59
B7	18	29434.9	4734.39	23302.1	125257	3491.1
B8	18	110288	17551	74481.6	409272	11233.8
B9	18	37058.1	6269.23	23704.3	129552	3521.08
B10	18	42077	6963.81	23630.4	133309	3859.3
B11	18	48285.3	8086.37	24196.7	143268	5698.4
B12	18	46954.9	8319.8	23155.9	147159	6658.33
C1	18	38005.6	6239.45	20714.5	131476	3362.17
C2	18	44244.3	6754.52	29301.7	180075	5632.57
C3	18	37695.2	4846.68	23307.4	131319	3434.56
C4	18	31402.8	5051.93	22463.7	119661	3163.73
C5	18	31773.9	5000.25	24122.8	125433	3717.3
C6	18	30322.8	4988.81	24538.5	124862	2535.92
C7	18	30889.1	5246.47	24220.1	122815	2387.82
C8	18	35765.4	5895.31	25089.8	127720	3684.23
C9	18	42399.1	8306.92	25359.1	128212	4470.88
C10	18	37449.8	6884.98	24523.7	133222	4212.67
C11	18	35822.8	6256.96	23058.9	136175	3244.79
C12	18	44629.7	7389.12	23169.4	146868	3531.43
D1	18	43128.8	6673.95	21759.8	134984	3337.38
D2	18	37066.5	5522.45	23089.7	136565	3231.41
D3	18	44080.7	7499.74	26088.1	137010	4813.76
D4	18	34361.9	6217.24	24717.8	126101	4993.09
D5	18	36362.1	5645.4	25006.9	126114	2943.85
D6	18	38564.9	6611.64	25270.9	121334	4458.11
D7	18	28002.1	4767.14	23889.3	118679	2558.3
D8	18	28556.3	6029.67	23749.5	116508	2524.81
D9	18	34655.6	6159.11	23775.8	129154	3891.99
D10	18	47248.9	8401.59	25493.1	131840	4951.2
D11	18	47808.1	8142.07	25287.4	140325	4313.07
D12	18	139786	18262.5	28882.4	147915	7699.21
E1	18	44699.2	9202.66	22569.9	131401	5835.86
E2	18	41732.6	6743.29	22079.2	124858	3667.95
E3	18	67103.1	8800.17	25989.5	134218	6244.31
E4	18	34104.6	5910.68	24990.1	128581	3244.39
E5	18	29380.3	4908.71	23798.6	120595	2710.22
E6	18	142663	22790.8	34786.4	136143	13246.7
E7	18	45149.1	7748.2	25479.7	119172	7936.12
E8	18	33440.9	6245.09	25613.6	124810	4097.92
E9	18	33830.2	7387.01	26124.9	122635	3436.38
E10	18	37381.3	6501.49	23052.2	122347	4176.5
E11	18	36535.3	6353.22	22496.5	125777	5701.53
E12	18	51763.5	8782.24	23253.8	136641	5348.9
F1	18	47479.2	14358	26135.2	142747	9299.82
F2	18	45977.4	7114.89	22998.9	134287	3403.03
F3	18	34359.1	5584.42	24966.5	141599	3059.73
F4	18	34531.6	5632.61	25259.5	132668	3513.38
F5	18	29494.9	4753.27	24792.7	128477	2620.08
F6	18	52381.6	9794.11	27737.3	128499	6920.81
F7	18	28923.5	4919.81	26048.7	136086	3372.82
F8	18	32677.7	5349.9	24920.8	127063	2465.85
F9	18	34306.8	5906.83	18891.1	96371.1	4371.36
F10	18	35170.6	5901.06	24041.4	132737	4224.69
F11	18	31459	5028.44	20408	120623	2760.01
F12	18	54894.8	10504	23256.3	133960	5909.07
G1	18	39172.7	9714.61	22429.6	141039	4088.11
G2	18	53615.2	8489.46	24983.8	146791	4147.16
G3	18	40332.8	10456.7	26421.4	141893	3249.21
G4	18	41149	8143.17	25244.9	139278	2836.63
G5	18	30574.5	5063	25615.4	138482	3104.91
G6	18	30804.3	5277.01	24984.4	131237	2660.84
G7	18	30293.9	5272.19	25034.3	133163	3275.5
G8	18	37420	8766.26	27758.6	141928	4578.6
G9	18	39269.1	6633.12	24583.2	133747	3274.51
G10	18	51295.2	9348.52	25761.1	141019	3865.41
G11	18	71318.6	12099.5	26173.6	142086	7726.71
G12	18	42516.9	6963.19	23194.7	151890	3504.17
H1	18	55341.1	13257.2	25312.7	154463	10535.1
H2	18	41131.6	7030.09	24575	156830	4459.99
H3	18	36257	6982.73	24468.8	143725	5261.62
H4	18	35317.1	6551	25409.7	143598	3264.16
H5	18	35885.8	6440.79	26354.8	146597	3381.71
H6	18	45440.1	8303.44	28015.8	152012	4492.22
H7	18	30779.7	7105.03	4353.43	5518.97	2886.09
H8	18	35106.7	6233.49	3854.61	6296.12	3343
H9	18	35193.1	5493.24	3602	6256.95	3351.2
H10	18	46899	10808.5	8195.61	11187.5	6806.48
H11	18	40404.9	6583.87	4232.55	6544	4049.23
H12	18	43450.4	5765.03	3531.64	6070.9	3429.68
A1	19	19127	3553.35	13076.6	92713.6	3103.72
A2	19	32936.9	4637.88	18471.2	121480	3278.62
A3	19	32272.5	5212.48	20393.6	126214	2979.51
A4	19	38791.8	6091.16	20847.3	119559	3093.49
A5	19	38906.3	5730.89	21652.8	122405	3427.08
A6	19	52589.9	9120.12	26903.2	142239	6097.43
A7	19	36138.7	6157.15	23345.7	127136	4574.57
A8	19	196133	32611.4	81087.5	413759	22791.9
A9	19	43924.7	6558.05	22753	129904	4125.83
A10	19	33454.6	5801.65	21498	131389	4573.23
A11	19	32077.7	5038.32	20491	136061	3306.85
A12	19	56348.9	6343.26	20113.7	139515	4649.51
B1	19	34715.5	5884.18	18372.6	122294	3899.39
B2	19	39912.5	6524.82	21369.6	128214	3839.08
B3	19	32801.4	6329.68	22310.4	126747	3394.77
B4	19	30853.4	4722.18	21952.1	123234	3547.9
B5	19	34040.4	5246.1	25939.4	146760	4073.92
B6	19	27664	4219.83	23217.1	126049	2772.52
B7	19	29808.9	4849.77	23392.7	124883	3122.73
B8	19	111698	17774.9	74143.9	408709	10332.8
B9	19	37562.8	6341.36	23651.9	129338	3553.31
B10	19	42006.4	6914.43	23498.3	133250	3929.4
B11	19	48271.2	8022.17	24301.3	143570	5608.33
B12	19	47286	8465.23	23265.1	147073	5978.02
C1	19	38497.7	6189.14	20654.6	131064	3888.14
C2	19	44707.5	6827.7	29086.8	180949	5345.08
C3	19	37707.9	5077.97	23199.5	131428	2983.45
C4	19	31452.5	5028.22	22235.5	119275	3320.29
C5	19	31822.1	4944.91	24117.6	125656	3597.94
C6	19	30240.3	4867.53	24445.9	124821	2818.46
C7	19	31037.2	5040.84	24211.7	123086	2418.32
C8	19	35823.4	5810.47	25157.9	127939	3641.08
C9	19	42428.8	8300.83	25375.3	128504	4394.37
C10	19	37443.9	7020.04	24325.8	133214	3971.01
C11	19	35701.4	6195.75	22933.5	136245	2902.42
C12	19	44909.5	7333.29	23137.2	147017	3923.81
D1	19	43587.9	6683.43	21899.7	135048	3609.57
D2	19	37097.8	5582.35	23276.8	136433	2827.62
D3	19	44931.3	7369.09	26208.7	137235	5099.22
D4	19	34270.5	6165.08	24812.2	126264	5399.14
D5	19	36356.8	5642.57	24942.2	125940	2864.96
D6	19	38539.3	6622.87	25302	121604	4416.26
D7	19	28377.9	4765.41	23880.2	118525	2726.85
D8	19	28743.2	6137.56	23622.8	116571	2408.27
D9	19	34900.4	6270.5	23814.8	129769	3838.43
D10	19	47214.6	8274.05	25569.7	132329	4794.45
D11	19	48396.5	8122.37	25190.6	140319	4224.45
D12	19	139913	18313.2	28888.1	147742	7589.9
E1	19	44344.9	9391.04	22502.3	131317	5904.03
E2	19	41830.9	6902.53	22086.6	124744	3803.53
E3	19	67118.2	8815.97	25875.7	134132	6320.53
E4	19	34468.5	5787.04	24832.4	128734	3225.61
E5	19	29577.3	4932.59	23702.7	120824	2997.69
E6	19	142621	22890.9	34630.9	136311	13661.1
E7	19	45232.7	7830.35	25436.4	119279	7797.9
E8	19	33247.9	6117.84	25675.8	124765	4005.79
E9	19	33900.8	7432.81	26237.4	122634	3830.05
E10	19	37267.7	6233.18	23058.5	122111	4389.5
E11	19	37158.4	6428.38	22342.4	126059	5708.22
E12	19	52271.1	8839.08	23268.4	136933	5505.58
F1	19	47633.6	14340.9	26196.7	143119	9084.19
F2	19	45680.7	7319.37	23300.9	134295	3508.29
F3	19	34580.9	5862.66	25024.1	141726	3159.74
F4	19	34512.5	5919.14	25294.5	132551	3413.37
F5	19	29503.2	4720.88	24784.4	128803	2536.14
F6	19	52542.3	9710.99	27897.7	128252	6770.95
F7	19	29394.6	4863.69	25972.9	136564	3522.05
F8	19	33016.3	5655.76	24872.3	127155	2746.25
F9	19	35534.6	5910.05	19035.9	96542.6	4752.52
F10	19	35282.1	5825.42	23941.2	132693	4122.48
F11	19	32120.9	5011.33	20589.1	120569	3154.01
F12	19	55137.6	10256	23179.3	133951	6261.58
G1	19	40111.3	9845.66	22542.5	141167	4178.32
G2	19	53953.8	8718.93	24780.5	146638	3780.69
G3	19	40826.3	10732.1	26371.9	141834	3360.79
G4	19	40533.7	8196.43	25134.2	139540	2996.71
G5	19	30421.8	5098.62	25479.2	138423	3114.38
G6	19	30894.2	5423.21	24830.4	130935	2709.24
G7	19	29938.6	5388.31	25009	133420	3370.41
G8	19	37475.3	8701.57	27658.7	141554	4564.19
G9	19	39916.6	6432.58	24867.9	133914	3296.41
G10	19	51167.9	9238.37	25701.9	140747	4119.08
G11	19	71559.6	11989.1	26123.5	141903	7747.41
G12	19	42844.6	6674.42	23199.2	152390	3545.23
H1	19	55611	13138	25481.3	154467	10358.5
H2	19	41279.3	6859.31	24383.2	156768	4266.33
H3	19	36047.9	6711.69	24217.3	144281	4942.48
H4	19	35422.5	6383.6	25270.1	143388	3370.53
H5	19	36238.3	6602.13	26376.3	146558	3601.65
H6	19	45614.7	8151.77	27945.3	151726	4484.57
H7	19	30859.9	7069.64	4333.2	5761.05	2862.28
H8	19	34935.6	5726.56	4005.29	6425.03	3609.56
H9	19	35142.8	5428.39	3622.7	6178.2	3397.57
H10	19	46997.6	10967.7	8227.86	11512	6825.4
H11	19	40613.6	6332.11	4183.29	6327.78	3663.48
H12	19	44106.5	5839.05	3319.82	5930.68	3652.77
A1	20	19070.6	3660.52	13081.4	92929.5	2813.96
A2	20	32528.4	5042.72	18192.4	120920	3156.84
A3	20	32055.9	5361.7	20323.8	126008	2753.2
A4	20	42449.9	6191.42	20664.8	119708	3396.51
A5	20	42310.6	6434	21727.4	122692	3636.3
A6	20	56902.4	9693.32	26783.9	141906	5936.31
A7	20	36155.8	5980.02	23303.6	126790	4082.35
A8	20	195497	32355.3	80562.9	414725	21838.6
A9	20	44042.2	6715.67	22795.8	129855	3622.47
A10	20	32798.9	5622.16	21559.6	131272	4416.3
A11	20	31642.5	4879.08	20452.8	135546	3186.05
A12	20	55776.1	6587.29	20140.1	139112	4247.13
B1	20	34445.6	5756.56	18558.2	122713	3819.88
B2	20	40468.5	6322.6	21236.5	128281	4304.3
B3	20	32905.4	6820.31	22198	126396	3329.88
B4	20	30612.3	4872.86	21879.8	122887	3443.3
B5	20	34402.5	5306.44	25885.2	147177	4594.02
B6	20	27593.8	4296.62	23378.3	126096	2626.55
B7	20	31014	4971.28	23342.9	125387	3326.89
B8	20	114545	17863.9	74084.7	408652	11200.2
B9	20	38504.4	6284.75	23712.7	129179	3319.37
B10	20	42101.6	6811.72	23501.3	133184	3931.38
B11	20	48417.1	7870.41	24058.8	143158	5977.83
B12	20	47029.6	8482.51	23057.8	146818	6225.4
C1	20	38733.1	6271.35	20625.8	130903	3763.65
C2	20	44491.3	6519.67	29173.1	180838	4729.25
C3	20	37477.4	4911.44	23214.6	131756	3082.45
C4	20	31510.7	5211.42	22293.1	119650	3139.97
C5	20	31340.1	5028.9	24133.1	125548	3706.27
C6	20	30304.4	4796.1	24598.7	124761	2596.4
C7	20	30682.4	5123.41	24246	123079	2474.39
C8	20	35767.1	6001.79	25106.2	128001	3643.78
C9	20	42419.5	7994.71	25505.6	128054	4372.76
C10	20	37914.5	6874.21	24316.8	133181	4196.76
C11	20	35801.2	6439.51	22996.7	136413	3259.14
C12	20	44984	7062.48	23073.8	147184	3794.59
D1	20	43611	6886.79	21736.8	134839	3431.64
D2	20	37147.7	5756.29	23251	136404	3151.53
D3	20	45072.6	7561.9	26125.2	137131	5255.11
D4	20	34649.6	6269.4	24665.9	126230	4777.38
D5	20	36542.3	5795.63	25050.7	126177	2843.99
D6	20	39032.4	6664.34	25244.4	121574	4449.92
D7	20	28733.6	4905.29	24048.2	118642	2798.83
D8	20	29052.2	5990.76	23790.5	116780	2650.68
D9	20	35259.1	6489.74	23871.4	130524	3466.35
D10	20	47624.4	8475.67	25467.2	131760	5068.28
D11	20	48121.4	8329.73	25159.7	140268	3911.69
D12	20	140181	18451.6	28851.2	147993	7533.26
E1	20	45007.8	9750.55	22562.3	131370	5506.51
E2	20	41846.8	6558.06	22108.7	125351	3720.1
E3	20	67219.9	8747.19	26002.5	134602	6421.21
E4	20	34013.3	5698.09	25031.3	129013	3389
E5	20	29820.4	4848.55	23688.9	120697	2998.64
E6	20	142907	22821.9	34633.6	136385	13279.8
E7	20	45024.2	8076.81	25511.7	119272	7479.81
E8	20	33481.7	6386.77	25554.2	124838	4370.47
E9	20	33828.5	7470.69	26222.8	122760	3885.22
E10	20	37290.4	6301.59	23112.7	122270	4207.72
E11	20	36941.2	6106.53	22427.6	125998	5535.21
E12	20	51943.6	8625.08	23252.2	137028	5909.32
F1	20	48700.6	14699.6	26039.7	142459	9406.99
F2	20	46396.4	7169.42	23207	134317	3105.65
F3	20	35366.5	5590.69	25028.5	141258	2868.73
F4	20	34618.8	5930.87	25243.3	132328	3542.95
F5	20	29287.4	4499	24587.3	128688	2397.93
F6	20	52473.7	9682.27	27852.6	128572	7014.88
F7	20	29610.3	5014.12	26095.5	136754	3583.06
F8	20	33003.8	5500.87	24970.9	126947	2704.19
F9	20	36509.3	6164.32	19009.4	96650.6	4212.27
F10	20	35266.2	6145.84	24019.1	133272	4512.98
F11	20	31958.5	4928.83	20551.5	120535	2756.03
F12	20	55070.7	10132.5	23241.6	134019	5995.96
G1	20	40962.3	9768.16	22411.5	140911	3588.05
G2	20	55555.2	9077.34	24853.4	146895	3945.88
G3	20	42050.6	10707.5	26376.3	141785	3479.46
G4	20	41366.7	8536.94	25143.8	139443	3251.55
G5	20	30460.2	4860.92	25523.5	138366	3002.36
G6	20	31215.8	5375.68	24856.8	131063	2764.33
G7	20	30141.7	5297.83	24858.1	133566	3331.19
G8	20	37714.1	8643.43	27684.5	141954	4623.54
G9	20	39587.8	6481.43	24553.2	134017	3334.08
G10	20	51653.4	9146.13	25640.1	140909	4054.06
G11	20	71279.2	11981.2	26052.8	141880	7552.36
G12	20	42859.3	6625.89	23130.9	152410	3561.2
H1	20	55109.7	13205.6	25479.7	154390	10795.5
H2	20	41750.5	7005.87	24639.4	156447	4283.62
H3	20	36411.2	6702.98	24446.2	143999	5175.62
H4	20	35281.5	6677.17	25330.7	143396	3312.88
H5	20	36198.9	6569.71	26434	146752	3535.59
H6	20	45821.5	8367.46	28024	151973	4407.33
H7	20	31036.6	7079.87	4353.43	5798.29	2651.94
H8	20	35015.4	6015.34	4000.43	6501.81	3644.57
H9	20	35394.9	5385.46	3525.25	6209.7	3477.2
H10	20	46969.1	11047.3	8307	11338.7	6708.87
H11	20	40251.7	6509.15	4268.67	6157.73	3521.37
H12	20	43949.5	5994.5	3499.05	5957.59	3686.65
A1	21	18995.5	3898.31	13043.6	92420.1	2689.99
A2	21	33083.8	5266.19	18622.9	121678	2902.19
A3	21	32816.6	5020.64	20620.6	125996	2845.73
A4	21	49192.7	7165.13	20742.4	119378	3476.75
A5	21	49291.7	7448	21743	122480	3547.9
A6	21	64869.2	10733.4	26976.2	142012	5855.75
A7	21	36118.3	6292.89	23406.4	126620	4317.59
A8	21	196900	32469.1	81236.1	414781	22246.3
A9	21	44623.7	6665.84	22857.8	129552	3941.89
A10	21	32721.6	5608.53	21681.6	131111	4529.03
A11	21	31425	5043.11	20507.2	135804	3246.45
A12	21	56534.9	6718.23	20116.5	139515	4185.99
B1	21	35209.2	5624.96	18369	122753	3613.49
B2	21	41091.7	6704.75	21334.2	128379	3870.36
B3	21	33019	6701.48	22128.6	126401	3259.08
B4	21	31459.7	4962.36	21999.1	122870	3606.14
B5	21	34758.1	5581.19	25841.7	146797	3787.93
B6	21	28336.5	4538.73	23489.9	125864	2884.94
B7	21	32712.6	5179.33	23335.7	124925	3326.89
B8	21	119059	18554.4	74594.2	406961	11856.9
B9	21	40171.9	6557.73	23728.6	129228	3316.61
B10	21	41869.5	7154.43	23581.8	133285	4086.38
B11	21	48417.1	8056.02	24159.9	142847	5779.22
B12	21	47474.2	8354.36	23142.1	147217	5966.77
C1	21	38629.2	6316.75	20704.1	131317	3424.97
C2	21	44740.1	6715.38	29313.5	179362	5554.32
C3	21	38034.7	4906.82	23156.5	131797	2962.07
C4	21	31435.6	5054.08	22269.8	119376	3010.4
C5	21	31670.8	5028.9	24066	125494	3739.37
C6	21	30185.7	5001.27	24419.7	124821	2471.98
C7	21	30894.5	5132.94	24219.2	122900	2695.36
C8	21	36014.5	6043.34	25131.6	127958	4047.35
C9	21	42423.7	8095.59	25502	128751	4371.86
C10	21	37439	6759.71	24398.8	133125	4296.21
C11	21	35523.1	6343.32	22940.1	136687	3078.02
C12	21	45199.7	7159.88	23284.7	147013	3774.44
D1	21	44338.3	7080.66	21780.8	134993	3189.27
D2	21	37946.7	5584.65	23331.7	136498	2914.07
D3	21	45419.1	7821.1	26206.6	136963	4706.32
D4	21	35013.3	6013.71	24699.8	126099	5116.81
D5	21	36788.5	5618	25107.5	125739	2947.84
D6	21	39291	6710.13	25448.3	121586	4498.15
D7	21	29038.7	4742.1	23946.8	118623	2684.03
D8	21	29584.7	6285.25	23867.8	116604	2644.15
D9	21	35729	6434.04	23791.6	130767	3829.82
D10	21	47172.9	8567.58	25554.4	131604	5171.81
D11	21	47894.9	8116.15	25114.3	140044	4039.92
D12	21	139958	18413.6	28911.7	147709	7412.03
E1	21	44874.5	9470.29	22447.8	131592	5831.66
E2	21	41931.5	6958.86	22072.8	124841	3658.56
E3	21	67140.5	8771.35	25996	134294	6557.65
E4	21	34528	5992.51	24950.7	128534	3300.73
E5	21	29958.2	4980.36	23741.5	120075	2619.43
E6	21	142706	23024.8	34689.1	136322	13084.5
E7	21	45472.8	8174.14	25374.2	118973	7593.42
E8	21	33459.2	6157.55	25311	124603	4035.54
E9	21	34087.9	7304.21	26268.2	122482	3806.67
E10	21	37329.7	6400.21	23092.8	121965	4486.82
E11	21	36797.4	6388.87	22191.2	126115	5647.04
E12	21	52323.7	8669.39	23210.7	137010	5492.32
F1	21	49791.4	14418.1	26056.7	143340	9428.68
F2	21	47280.4	7274.28	23063.6	134073	3251.78
F3	21	36374	5858.19	25004.6	141784	2911.97
F4	21	34463.4	5878.09	25322.6	132838	3641.22
F5	21	29316.1	4765.41	24863.4	128639	2482.72
F6	21	52471.6	9697.38	27852.6	128522	6843.49
F7	21	30907.8	5264.32	26227.7	137190	3356.34
F8	21	34002.7	5567.37	24957.9	127159	2868.31
F9	21	39522.9	6321.22	18930.8	96437	4317.76
F10	21	35176.5	5972.46	24026	133348	4152.18
F11	21	31847.9	4896.64	20380.3	120569	2823.69
F12	21	54997.4	10215.7	23263.7	133633	5784.12
G1	21	43243.1	10141.6	22393.3	141191	4704.16
[truncated: 10,391 more rows]

## Sheet: Multicomponent Data
Block Type	96alum
Chemistry	SYBR_GREEN
Experiment File Name	D:\ShuJu\LZM\spx 11-15zuzhi teyi.eds
Experiment Run End Time	2023-07-14 09:22:46 AM CST
Instrument Type	sds7500
Passive Reference	ROX
Well	Cycle	SYBR	ROX
A1	1	18999	94225
A2	1	32040.4	123470
A3	1	31136.5	127053
A4	1	33053.7	120752
A5	1	32535.7	124215
A6	1	44000.5	143436
A7	1	34500.2	128109
A8	1	183097	420077
A9	1	39964.4	131876
A10	1	31444.3	133367
A11	1	31584.3	138891
A12	1	39220.4	140088
B1	1	34565.1	124716
B2	1	38810.2	130974
B3	1	32383.4	128653
B4	1	30305	125159
B5	1	33537.9	149399
B6	1	27090.3	129099
B7	1	29085	127816
B8	1	109284	416949
B9	1	36837.9	131428
B10	1	40374.8	135542
B11	1	45675.9	145598
B12	1	43836.1	148916
C1	1	36268.6	132337
C2	1	42848.5	182064
C3	1	37283.7	134019
C4	1	31144.6	121730
C5	1	31981.4	128947
C6	1	30197.3	128791
C7	1	30681.3	126571
C8	1	36013.9	131116
C9	1	43080.1	131132
C10	1	37831.5	135397
C11	1	34826.6	138415
C12	1	41667.1	147816
D1	1	41110.6	135302
D2	1	36344.2	137141
D3	1	43653.1	139556
D4	1	34366.4	129393
D5	1	35782.7	129640
D6	1	38601.6	125501
D7	1	28157.9	121292
D8	1	28441.4	119397
D9	1	33508.3	123583
D10	1	47607.6	134277
D11	1	47353.4	141056
D12	1	121831	146754
E1	1	42716.3	132601
E2	1	41786.2	126896
E3	1	67912.3	136848
E4	1	33748.4	132017
E5	1	29411.3	123464
E6	1	146158	141865
E7	1	45735.4	122777
E8	1	33257.9	127806
E9	1	33310.1	125091
E10	1	37950.6	124656
E11	1	36704.3	126972
E12	1	48072.7	138987
F1	1	45440.6	144530
F2	1	39430.3	135965
F3	1	33682.5	144261
F4	1	33753.7	134804
F5	1	29213.5	130925
F6	1	52402.3	131639
F7	1	28089.2	130847
F8	1	31759.3	129393
F9	1	32966.8	97595.2
F10	1	35133.1	135142
F11	1	30647.5	122600
F12	1	52050.6	134968
G1	1	38428.8	143653
G2	1	50049.6	149292
G3	1	38220.4	144137
G4	1	38522.1	141830
G5	1	30558.4	141253
G6	1	31052.2	133774
G7	1	29655.6	136822
G8	1	37395.3	144944
G9	1	38869.4	136725
G10	1	49926	143370
G11	1	64310.1	144379
G12	1	41815.3	154271
H1	1	56502.2	157792
H2	1	41944.7	159697
H3	1	36397.2	147130
H4	1	34026.8	145732
H5	1	34414.1	149143
H6	1	41962.2	154728
H7	1
H8	1
H9	1
H10	1
H11	1
H12	1
A1	2	19033.4	94183.2
A2	2	32502.4	122397
A3	2	31168	126356
A4	2	33494.7	120497
A5	2	33009.6	123868
A6	2	45046.6	143634
A7	2	35234.5	128661
A8	2	185306	419650
A9	2	40325.2	131795
A10	2	31796.2	132661
A11	2	31684.6	137600
A12	2	39646.9	140176
B1	2	34009.6	124092
B2	2	38818.2	129586
B3	2	32351.8	127307
B4	2	30642.2	124234
B5	2	33763.4	148313
B6	2	26936.8	128055
B7	2	29372.8	127392
B8	2	109926	413597
B9	2	36816.8	131149
B10	2	40746.6	134240
B11	2	46400	144554
B12	2	44576.1	148356
C1	2	36553.1	132113
C2	2	43204.6	180191
C3	2	37803.2	132431
C4	2	31192.6	120472
C5	2	31764.6	127042
C6	2	30432.2	127469
C7	2	30837.1	125495
C8	2	35934.1	130037
C9	2	43498.6	129905
C10	2	37898	134554
C11	2	35204.4	136967
C12	2	42566.6	148156
D1	2	41648.2	135308
D2	2	36435.2	136447
D3	2	43701.7	138345
D4	2	33908.1	128057
D5	2	35898.8	127894
D6	2	38677.4	123639
D7	2	28131.1	120730
D8	2	28585.1	118406
D9	2	33661.8	123650
D10	2	48026.7	133081
D11	2	47717.4	140281
D12	2	124823	147253
E1	2	42911.8	132487
E2	2	41735	125841
E3	2	67787.5	135315
E4	2	33799.8	130921
E5	2	29397.9	122392
E6	2	145213	140546
E7	2	45473.3	121204
E8	2	33183.1	127039
E9	2	33662.8	124326
E10	2	37889.9	123493
E11	2	36382.2	126329
E12	2	48518.9	139396
F1	2	46226.9	144223
F2	2	40289.6	134536
F3	2	33700.3	143076
F4	2	34301.9	133681
F5	2	29376.3	129589
F6	2	52394.9	130579
F7	2	28315.4	130965
F8	2	31961.5	128714
F9	2	33129.8	97332.6
F10	2	35102.2	134045
F11	2	31182.3	121366
F12	2	52824.4	135767
G1	2	38544.4	142981
G2	2	49865.2	147278
G3	2	38594.4	142819
G4	2	39240	140552
G5	2	30468.2	139694
G6	2	31187.5	132733
G7	2	29726.6	135291
G8	2	37554.7	144163
G9	2	39072.2	135547
G10	2	50340.7	142044
G11	2	64526.4	143083
G12	2	41817.4	154125
H1	2	55680.9	157464
H2	2	41910.9	159115
H3	2	36545.7	146706
H4	2	34441.1	145025
H5	2	34977.9	148584
H6	2	42896.3	154464
H7	2
H8	2
H9	2
H10	2
H11	2
H12	2
A1	3	18993.5	94220.4
A2	3	31957.5	122079
A3	3	31179.1	126362
A4	3	33959.9	120204
A5	3	33318.7	123713
A6	3	45572.4	143337
A7	3	35397.1	128298
A8	3	186965	418715
A9	3	41127.6	130986
A10	3	31956	132491
A11	3	31684.3	136949
A12	3	40242.6	140674
B1	3	34061.3	124169
B2	3	39074.9	129284
B3	3	32135.1	126947
B4	3	30508.4	124241
B5	3	33957.7	147974
B6	3	26745.5	127563
B7	3	29198.5	126943
B8	3	109005	412271
B9	3	36750.4	130516
B10	3	41547.9	133924
B11	3	46547.5	144291
B12	3	45002.2	148514
C1	3	36562.1	131457
C2	3	43376.4	179885
C3	3	37419.2	132778
C4	3	31420.2	120158
C5	3	31540.1	126759
C6	3	30119.7	127289
C7	3	31098.2	125118
C8	3	35919.6	129766
C9	3	43532.5	129910
C10	3	37864.2	134276
C11	3	34826.2	137018
C12	3	42947.3	148096
D1	3	41830.3	135105
D2	3	36160.9	136078
D3	3	43493.2	137744
D4	3	33823.5	127849
D5	3	35759.3	127778
D6	3	38550.1	123620
D7	3	28305	119817
D8	3	28288.1	118694
D9	3	33750.3	124255
D10	3	47699.2	132994
D11	3	47587.9	140214
D12	3	126519	147634
E1	3	43056	132503
E2	3	41771.1	125463
E3	3	67518.8	135125
E4	3	33366.3	130438
E5	3	29466	122159
E6	3	145162	139539
E7	3	45641	121022
E8	3	33243.1	126348
E9	3	33471.8	123974
E10	3	37671.9	123360
E11	3	36778.6	126499
E12	3	48747.2	139329
F1	3	46717	143622
F2	3	41082.2	134131
F3	3	34048.7	142432
F4	3	33975.5	133358
F5	3	29350.2	129477
F6	3	52342	130273
F7	3	27855.6	130980
F8	3	32308.1	128030
F9	3	33308.6	97011.5
F10	3	35196.5	133987
F11	3	31427.6	120651
F12	3	53589.1	135467
G1	3	38880.2	142447
G2	3	50226.6	147230
G3	3	38862.8	142501
G4	3	39222	140406
G5	3	30382.1	139869
G6	3	30999.2	132448
G7	3	29748.9	134715
G8	3	37919.7	143591
G9	3	39311.1	135526
G10	3	50701.1	142130
G11	3	65135.9	142464
G12	3	41748.4	154283
H1	3	56372.8	158359
H2	3	41835.1	158611
H3	3	36684.1	146042
H4	3	34148.4	144697
H5	3	35303.7	148100
H6	3	43538.2	153891
H7	3
H8	3
H9	3
H10	3
H11	3
H12	3
A1	4	19338	94127.6
A2	4	32554	121736
A3	4	31389.3	126475
A4	4	34376.8	120074
A5	4	33227.4	123513
A6	4	45570.2	143073
A7	4	35770.6	128539
A8	4	188343	418493
A9	4	41255.4	130829
A10	4	32039.1	132431
A11	4	31428.2	136629
A12	4	40311.6	140557
B1	4	34578.2	123181
B2	4	39314.5	129029
B3	4	32172.1	127100
B4	4	30352.5	124073
B5	4	33504.8	147379
B6	4	26948.2	127120
B7	4	29475.6	126536
B8	4	109663	412402
B9	4	36702.4	130431
B10	4	41652	133565
B11	4	47153	143546
B12	4	45270.3	148015
C1	4	36592.7	130760
C2	4	43585.4	179858
C3	4	37581.3	132092
C4	4	31642.4	119978
C5	4	31785.1	126558
C6	4	30190	126491
C7	4	31116.9	124679
C8	4	36115.4	128897
C9	4	43072.1	129116
C10	4	38084.9	134261
C11	4	35442.9	136551
C12	4	43317.1	148353
D1	4	41847.5	134957
D2	4	36262.6	136193
D3	4	43476.3	137520
D4	4	34051.4	127407
D5	4	35786.7	127109
D6	4	38393.9	123213
D7	4	28130.7	119816
D8	4	28550.7	117726
D9	4	33836.4	124636
D10	4	47828.8	132765
D11	4	48034.1	140539
D12	4	128528	147740
E1	4	43388.1	131890
E2	4	41633.4	125234
E3	4	67260.9	134831
E4	4	33529.5	129911
E5	4	29603.6	121469
E6	4	145172	139147
E7	4	45511.3	120903
E8	4	33076.5	125925
E9	4	33319.6	123997
E10	4	37646.4	122933
E11	4	36705.3	126427
E12	4	49255.1	138642
F1	4	46337.4	143747
F2	4	41578.6	134099
F3	4	33897.1	142170
F4	4	34125.6	133225
F5	4	29197.6	129410
F6	4	52219.6	129828
F7	4	28142.7	131272
F8	4	32386.6	127677
F9	4	33261.5	96850.4
F10	4	34961.3	133911
F11	4	31711.6	120713
F12	4	53809.5	135319
G1	4	39119.1	142450
G2	4	50590.1	147110
G3	4	39058.1	142776
G4	4	38806.7	140148
G5	4	30643.2	139750
G6	4	31018.6	132233
G7	4	29872.6	134530
G8	4	37594.2	143486
G9	4	39487.1	135068
G10	4	50872.9	141893
G11	4	65997.4	142435
G12	4	42284.3	154031
H1	4	56402.3	157340
H2	4	41393.4	158771
H3	4	36505.6	145747
H4	4	34296.8	144824
H5	4	35269.9	147915
H6	4	43978.5	153583
H7	4
H8	4
H9	4
H10	4
H11	4
H12	4
A1	5	18666.5	94056.1
A2	5	32630.2	121433
A3	5	31764.3	126080
A4	5	33994.3	120194
A5	5	33836.6	123377
A6	5	45991.1	143143
A7	5	35954.8	128155
A8	5	190267	418523
A9	5	41781.1	130961
A10	5	32346.5	132183
A11	5	32146.9	137332
A12	5	45933.6	140489
B1	5	34215.9	123212
B2	5	39812.1	129271
B3	5	32319.2	127231
B4	5	30322.6	123963
B5	5	33768.7	147722
B6	5	26978.7	127309
B7	5	29368.7	126499
B8	5	110032	412397
B9	5	36949.8	130304
B10	5	41771	133960
B11	5	47261.8	143829
B12	5	45893.3	147701
C1	5	37134.7	131710
C2	5	44180.6	179927
C3	5	37598.7	132437
C4	5	31460.1	120233
C5	5	31656.3	126705
C6	5	30233.1	126501
C7	5	30691.1	124752
C8	5	35981.9	129169
C9	5	43348.9	129552
C10	5	38044.6	133968
C11	5	35597.5	136865
C12	5	43660.4	147802
D1	5	42216.7	135224
D2	5	36477.3	136561
D3	5	43452.1	137882
D4	5	33913	127782
D5	5	35697.1	127285
D6	5	38404	123153
D7	5	27939	119573
D8	5	28606.5	117766
D9	5	33546.8	124804
D10	5	47687.8	132941
D11	5	47977	140906
D12	5	130164	147875
E1	5	43632.3	131991
E2	5	41749.2	125537
E3	5	67031.7	135294
E4	5	33508.9	129927
E5	5	29385.4	121699
E6	5	144492	139062
E7	5	45679.9	121156
E8	5	32932.9	125910
E9	5	33804.3	123765
E10	5	37426.4	123079
E11	5	36747.3	126408
E12	5	49484.1	138992
F1	5	46536.6	143863
F2	5	41813.8	134615
F3	5	33985.4	142194
F4	5	34201	133150
F5	5	29339.2	129367
F6	5	52473.6	129802
F7	5	28175.2	131584
F8	5	31998.1	128023
F9	5	33645.9	97177.4
F10	5	35032.5	133779
F11	5	31760.2	120788
F12	5	53845.1	135351
G1	5	39107.2	142035
G2	5	50923.5	147332
G3	5	39222.4	142810
G4	5	40535.1	140278
G5	5	30733.3	139407
G6	5	30967.7	131884
G7	5	30012.3	134725
G8	5	37804.2	143602
G9	5	39763.2	135291
G10	5	51161.3	141772
G11	5	66179.1	142667
G12	5	42158.6	153813
H1	5	56223.7	157452
H2	5	41571.2	158070
H3	5	36711.3	145529
H4	5	34340	144309
H5	5	35445.1	147810
H6	5	44351	153596
H7	5
H8	5
H9	5
H10	5
H11	5
H12	5
A1	6	19167.7	93866.9
A2	6	32995.2	121445
A3	6	31881.3	125999
A4	6	34509.2	120004
A5	6	34006.3	123388
A6	6	46018.9	142943
A7	6	35948	128248
A8	6	191328	417665
A9	6	41765.8	130678
A10	6	32271.4	131980
A11	6	32110.1	136635
A12	6	55404.8	140911
B1	6	34162.5	124067
B2	6	39335.2	129125
B3	6	32006.1	127535
B4	6	30518.1	123745
B5	6	33667.1	148155
B6	6	26869.5	127516
B7	6	29146.1	126411
B8	6	109897	412485
B9	6	36846	130141
B10	6	41973.7	133791
B11	6	47961.2	144083
B12	6	46276.2	148360
C1	6	37124.2	131196
C2	6	44011.9	180290
C3	6	37211.8	132554
C4	6	31766.4	120377
C5	6	31825.4	126735
C6	6	30390.7	126363
C7	6	30897.4	124446
C8	6	35866.5	129324
C9	6	43090.9	129104
C10	6	37957.8	134084
C11	6	35406	137047
C12	6	44096.2	148219
D1	6	42197.7	135128
D2	6	36337.8	136577
D3	6	43370.7	137829
D4	6	33812.4	127464
D5	6	35583.6	126946
D6	6	38393.7	122964
D7	6	28124.7	119914
D8	6	28734.7	117591
D9	6	33863.6	125295
D10	6	47996	132743
D11	6	47994.8	140983
D12	6	131464	147618
E1	6	43635.2	131916
E2	6	41619.8	125700
E3	6	67340	135228
E4	6	33117.9	129829
E5	6	29510.3	121604
E6	6	144387	138748
E7	6	45570.5	120498
E8	6	32812.7	126159
E9	6	33599	123843
E10	6	37545.1	123054
E11	6	37234	126221
E12	6	49619.9	138719
F1	6	47000.7	143898
F2	6	42095.8	134374
F3	6	33906.3	142282
F4	6	34640.2	133704
F5	6	29505.5	129519
F6	6	52462.4	129877
F7	6	28442.8	132082
F8	6	31914.7	128141
F9	6	33635.4	97070
F10	6	34939	133559
F11	6	31657.2	120954
F12	6	54191.1	134988
G1	6	38994.2	141892
G2	6	50471.8	146996
G3	6	39229.8	142693
G4	6	39295.1	140076
G5	6	30542.6	139247
G6	6	31065.2	132040
G7	6	29966	134618
G8	6	37642.2	143245
G9	6	39481	135046
G10	6	51048.1	141472
G11	6	66839.3	142223
G12	6	42197.3	153676
H1	6	56332.1	157141
H2	6	41620.3	157942
H3	6	36375.4	145540
H4	6	34614.1	144619
H5	6	35591.9	148156
H6	6	44573.3	153744
H7	6
H8	6
H9	6
H10	6
H11	6
H12	6
A1	7	19186.3	93652.5
A2	7	32434	121533
A3	7	31896.5	126291
A4	7	34146.3	119932
A5	7	34055.3	123139
A6	7	45902.1	143099
A7	7	36020.2	127985
A8	7	191591	417594
A9	7	42149.7	130603
A10	7	32485.6	132078
A11	7	32090.9	136882
A12	7	57300.1	140849
B1	7	34396.5	123175
B2	7	39600.3	129242
B3	7	32192.1	127266
B4	7	30686.1	123911
B5	7	33718.9	148025
B6	7	27207.2	127258
B7	7	29278.5	126125
B8	7	109807	411644
B9	7	36739.7	130131
B10	7	42107.1	133988
B11	7	47949	143939
B12	7	46214.4	147818
C1	7	37316.9	131724
C2	7	44688.2	180403
C3	7	37298	132570
C4	7	31364.4	120456
C5	7	31841.4	126563
C6	7	30311.5	126424
C7	7	30994.1	124438
C8	7	36019.1	129007
C9	7	42853.7	129372
C10	7	37865.3	133797
C11	7	35738	137014
C12	7	44143	148290
D1	7	42155.5	135225
D2	7	36735.4	136595
D3	7	43221	137751
D4	7	33925.8	127471
D5	7	35597.4	126874
D6	7	38306.6	122652
D7	7	28078.7	119445
D8	7	28689.2	117752
D9	7	33576.1	125811
D10	7	47650.7	132981
D11	7	48229.1	140810
D12	7	132785	147860
E1	7	43981.4	132072
E2	7	41736.2	125778
E3	7	66789.2	134968
E4	7	33272.1	129773
E5	7	29459.4	121279
E6	7	144294	138899
E7	7	45291	120577
E8	7	32807	125913
E9	7	33831.9	123447
E10	7	37658	123135
E11	7	36882.6	126483
E12	7	49540.8	138590
F1	7	46960.7	144073
F2	7	42595.6	134965
F3	7	34120	142373
F4	7	34449.4	133408
F5	7	29293.1	129448
F6	7	52511	129882
F7	7	28211.8	132664
F8	7	32210	127836
F9	7	33640	96734.1
F10	7	34828.4	133903
F11	7	31812.4	121040
F12	7	54534.1	135042
G1	7	38631.9	142090
G2	7	51011.5	147366
G3	7	39576.3	142499
G4	7	40771	140014
G5	7	30643	139225
G6	7	31239.2	132203
G7	7	30058.8	134611
G8	7	37993	143232
G9	7	39698.5	134982
G10	7	50826	141850
G11	7	66907.4	142711
G12	7	42116.5	153549
H1	7	56944.6	156836
H2	7	41762.8	158556
H3	7	36352.2	145075
H4	7	34651.5	144444
H5	7	35837	147741
H6	7	44785.5	153470
H7	7
H8	7
H9	7
H10	7
H11	7
H12	7
A1	8	19295.8	93837.6
A2	8	32557.2	121536
A3	8	32013	126102
A4	8	34750.6	120511
A5	8	34026.7	123428
A6	8	46192.8	142893
A7	8	35836.8	128150
A8	8	193165	418101
A9	8	42136.8	130629
A10	8	32812.8	132022
A11	8	31935.7	136687
A12	8	56525.4	140524
B1	8	34689.5	122978
B2	8	39692.8	128554
B3	8	32505.5	127377
B4	8	30307.8	124180
B5	8	33717.1	148090
B6	8	26922.6	127111
B7	8	29320.3	126218
B8	8	110167	411698
B9	8	36935.7	130459
B10	8	42254.9	133775
B11	8	48401.2	143803
B12	8	46386.5	148054
C1	8	37053	131750
C2	8	43827.1	180948
C3	8	37537.7	132544
C4	8	31767.2	120338
C5	8	31753.7	126882
C6	8	30332.6	126320
C7	8	30856	124481
C8	8	35980.4	129383
C9	8	43078.8	129403
C10	8	38072	133859
C11	8	36134.1	136600
C12	8	44523.1	147486
D1	8	42296.1	135427
D2	8	36358.1	136873
D3	8	43503.1	137555
D4	8	33738	127188
D5	8	35651.3	127482
D6	8	38185.3	123125
D7	8	28143.9	119662
D8	8	28796.2	117815
D9	8	33504.6	126012
D10	8	47767	132865
D11	8	47945.8	140831
D12	8	133879	148170
E1	8	43327.3	132004
E2	8	41337	125575
E3	8	66762.8	135058
E4	8	33501.1	129921
E5	8	29303.4	122006
E6	8	143525	138556
E7	8	45570.6	120837
E8	8	32941.7	126103
E9	8	33839.5	124014
E10	8	37507.7	123225
E11	8	36746.7	126732
E12	8	49932.2	138208
F1	8	47480.9	143502
F2	8	42676.3	134514
F3	8	34070.6	142536
F4	8	34377.6	133570
F5	8	29185	129447
F6	8	52595.2	129981
F7	8	28186	132712
F8	8	32336.2	128078
F9	8	33637.3	97171.3
F10	8	34915.6	133983
F11	8	31650.9	120941
F12	8	54299.7	135046
G1	8	38935.3	141827
G2	8	51131.5	147780
G3	8	39630.2	143119
G4	8	39760.1	140219
G5	8	30679.9	139855
G6	8	31267.9	131966
G7	8	29960.7	134415
G8	8	37711.6	142940
G9	8	39762.8	135442
G10	8	51005	142181
G11	8	67077.9	142432
G12	8	42539.3	153380
H1	8	56881.3	156681
H2	8	41640.3	158164
H3	8	36430.3	145265
H4	8	35054.8	144446
H5	8	35881.4	147773
H6	8	44912.6	153475
H7	8
H8	8
H9	8
H10	8
H11	8
H12	8
A1	9	19259.6	93517.3
A2	9	32573.9	122163
A3	9	32209.6	126605
A4	9	34531.9	119807
A5	9	33963.7	123334
A6	9	46262.2	142814
A7	9	36047.1	127980
A8	9	193941	418235
A9	9	42604	130653
A10	9	32668.7	131639
A11	9	31663.6	136745
A12	9	56079.8	140215
B1	9	34178.9	123546
B2	9	39646.9	128907
B3	9	32546.3	127077
B4	9	30621.7	123752
B5	9	33424.6	147880
B6	9	26842.4	127277
B7	9	29208.9	126007
B8	9	109846	411778
B9	9	37032.4	130201
B10	9	42332.9	134157
B11	9	48206.1	143951
B12	9	46397.4	148429
C1	9	37504.6	131667
C2	9	44231.2	181427
C3	9	37421.9	132811
C4	9	31551.5	120674
C5	9	31547.6	126326
C6	9	30423	126226
C7	9	30616.7	124331
C8	9	36087.6	129195
C9	9	42916.7	129424
C10	9	38238.4	134157
C11	9	35699.9	136514
C12	9	44487.5	148086
D1	9	42169.4	135328
D2	9	36796.8	136755
D3	9	43296.5	137774
D4	9	33826.1	127436
D5	9	35620.8	127048
D6	9	38339.8	122970
D7	9	28284.7	119257
D8	9	28557.9	117473
D9	9	33415.7	126527
D10	9	47645.2	132958
D11	9	48202.8	140605
D12	9	134519	147851
E1	9	43914.4	131908
E2	9	42057.3	125488
E3	9	66777.6	134967
E4	9	33399	129914
E5	9	29403.1	121351
E6	9	143693	138297
E7	9	45460.6	120497
E8	9	32943.9	125598
E9	9	33911.5	123324
E10	9	37526.1	123473
E11	9	37256.9	126578
E12	9	50082.7	138426
F1	9	47590	143668
F2	9	42854.2	134665
F3	9	33892.9	142541
F4	9	34553.7	133232
F5	9	29389.8	129371
F6	9	52400.7	129947
F7	9	28587.5	133240
F8	9	32375.6	128021
F9	9	33819.6	96953.2
F10	9	34978.6	133968
F11	9	32117.5	120839
F12	9	54488.5	135129
G1	9	38710.4	141781
G2	9	51202.7	147791
G3	9	39743.5	142802
G4	9	40981.7	140141
G5	9	30808.8	139463
G6	9	31119.8	131866
G7	9	30106	134593
G8	9	37625.8	143270
G9	9	39776.9	134967
G10	9	51058.5	141808
G11	9	67365	142347
G12	9	42802.1	153401
H1	9	56431	156183
H2	9	41673.6	157691
H3	9	36284.7	144973
H4	9	34634.8	144347
H5	9	35699.5	147659
H6	9	44924.4	153113
H7	9
H8	9
H9	9
H10	9
H11	9
H12	9
A1	10	19263.8	93884.7
A2	10	33025.2	122208
A3	10	32118.9	126340
A4	10	34075.3	120183
A5	10	34130.3	123562
A6	10	46219.9	143368
A7	10	35959.1	128034
A8	10	194565	417420
A9	10	42794.1	130617
A10	10	32587.4	132059
A11	10	32263.1	136557
A12	10	56233.4	139641
B1	10	34369.7	123287
B2	10	40064.3	128813
B3	10	32530.9	127197
B4	10	30303.2	123819
B5	10	33945.2	147767
B6	10	27117.5	127056
B7	10	29043	126537
B8	10	109632	411308
B9	10	36669.7	130356
B10	10	42200.6	134147
B11	10	48278.5	144087
B12	10	46460.8	148666
C1	10	37885.3	131287
C2	10	44073.3	180938
C3	10	37431.8	132844
C4	10	31850.3	120425
C5	10	31909.7	126826
C6	10	30229.8	126303
C7	10	31061.1	124403
C8	10	36075.8	129197
C9	10	42919.8	129808
C10	10	38197.7	134186
C11	10	35687.4	137330
C12	10	44869.4	148070
D1	10	42765.3	135206
D2	10	36277.4	136611
D3	10	43535.8	137976
D4	10	33936.6	127598
D5	10	35633.3	127143
D6	10	38400.4	122867
D7	10	28215.5	119382
D8	10	28453	117890
D9	10	33835.6	126467
D10	10	47807	133194
D11	10	48170.3	141102
D12	10	134992	148260
E1	10	44099	132299
E2	10	41680.7	125626
E3	10	67012.8	135763
E4	10	33169.5	130392
E5	10	29316.9	121256
E6	10	143750	138711
E7	10	45384	120636
E8	10	32875.1	125995
E9	10	33798.4	123810
E10	10	37467.3	123218
E11	10	37253.5	126428
E12	10	50685.2	138646
F1	10	47642.8	143564
F2	10	43182.7	134669
F3	10	33825.9	142481
F4	10	34667.3	133433
F5	10	29458.4	129413
F6	10	52511.3	129683
F7	10	28488	133517
F8	10	32307	128248
F9	10	33711	97076.9
F10	10	34952.6	133775
F11	10	32086.1	121020
F12	10	54564.8	135220
G1	10	38617	141766
G2	10	51647.8	147348
G3	10	40183.6	143025
G4	10	38713.3	140245
G5	10	30522.8	139580
G6	10	30924.3	132457
G7	10	29920.2	134830
G8	10	37803.1	143281
G9	10	39645.5	135007
G10	10	51285.3	141901
G11	10	67661.8	142609
G12	10	42422.7	153068
H1	10	56313.2	156164
H2	10	41222.5	157783
H3	10	36333.1	144850
H4	10	34823.7	144307
H5	10	36102.5	147790
H6	10	45281.3	153278
H7	10
H8	10
H9	10
H10	10
H11	10
H12	10
A1	11	19535.7	93582
A2	11	32878.3	121931
A3	11	31924.3	125935
A4	11	34490.6	120318
A5	11	34446.3	123422
A6	11	46371	143156
A7	11	36225.4	127960
A8	11	193350	418300
A9	11	42863.1	130650
A10	11	32877.8	132176
A11	11	31813.5	136391
A12	11	56315.7	140649
B1	11	35189.8	123258
B2	11	39796.4	129228
B3	11	32395.8	127182
B4	11	30473.6	123775
B5	11	33755	147903
B6	11	27018.7	127123
B7	11	29236.4	126096
B8	11	109653	411427
B9	11	37143.3	130391
B10	11	42080.8	134197
B11	11	48341.8	144131
B12	11	46741.9	148374
C1	11	37905.9	131804
C2	11	44276.1	180616
C3	11	37644	132563
C4	11	31309.7	120815
C5	11	31564.2	126480
C6	11	30303.1	126321
C7	11	30884.2	124371
C8	11	35812	129132
C9	11	42598.8	129701
C10	11	38126.2	134618
C11	11	36279.2	136896
C12	11	44663.3	148248
D1	11	42883.3	135469
D2	11	36721.7	136762
D3	11	43277.3	137928
D4	11	33731.7	127546
D5	11	35777.3	127350
D6	11	38198.4	122684
D7	11	28246.9	119753
D8	11	28581.6	117987
D9	11	33943.8	127087
D10	11	47682.1	133268
D11	11	48211.5	140910
D12	11	136360	148274
E1	11	44155.8	132126
E2	11	41619.8	125970
E3	11	66577.3	135065
E4	11	33595.5	129817
E5	11	29565.1	121867
E6	11	143452	138550
E7	11	45226	120534
E8	11	33112.4	126188
E9	11	33738	123993
E10	11	37361.9	123039
E11	11	37268.9	126704
E12	11	50387.4	138352
F1	11	47687.9	144076
F2	11	43167.4	134882
F3	11	33741.6	142730
F4	11	34568.5	133478
F5	11	29470.5	129532
F6	11	52586.3	129812
F7	11	28611.3	133920
F8	11	32292	128026
F9	11	33703.4	97156.7
F10	11	35006.4	133939
F11	11	32118.3	121214
F12	11	54892.8	135095
G1	11	38687.9	141922
G2	11	51463	147627
G3	11	39797.6	142916
G4	11	39177.1	140096
G5	11	30550.1	139355
G6	11	30994	132147
G7	11	29995.7	134628
G8	11	37504.6	143355
G9	11	40331.4	135245
G10	11	51148.7	142080
G11	11	67470.2	142958
G12	11	42642	153318
H1	11	56231.5	156364
H2	11	41302.6	158088
H3	11	36015	145275
H4	11	34760.6	144095
H5	11	35869.8	147559
H6	11	45240.6	153234
H7	11
H8	11
H9	11
H10	11
H11	11
H12	11
A1	12	19202.9	93620
A2	12	32911.8	121531
A3	12	32040.6	126346
A4	12	34488.9	120064
A5	12	34337.6	123567
A6	12	46116.7	143081
A7	12	36086	128134
A8	12	194346	418297
A9	12	42734.5	130769
A10	12	33135.1	132014
A11	12	32018.9	136141
A12	12	56187.6	140678
B1	12	34417	123413
B2	12	40197.1	129641
B3	12	32802.1	127725
B4	12	30620.5	123539
B5	12	33716.7	147840
B6	12	27162.9	127205
B7	12	29647.3	126338
B8	12	110018	410881
B9	12	36803.2	130329
B10	12	42534.1	134294
B11	12	48211.2	143697
B12	12	46931.6	147941
C1	12	38080.2	131947
C2	12	45011.9	180888
C3	12	37654	132306
C4	12	31606.9	120237
C5	12	31660.6	126401
C6	12	30357.5	125818
C7	12	30824.4	124194
C8	12	35871.2	129256
C9	12	42749	129439
C10	12	37863.5	134395
C11	12	36185.2	137067
C12	12	44475.5	147838
D1	12	42449	135588
D2	12	36340.1	137037
D3	12	43224.5	137803
D4	12	34210.9	127094
D5	12	35902.8	127247
D6	12	38564.3	122930
D7	12	28364.3	119340
D8	12	28689.5	117814
D9	12	33993.9	127828
D10	12	47729.4	133336
D11	12	47903	141535
D12	12	136562	148403
E1	12	43911.1	132141
E2	12	41841.6	125853
E3	12	66623.2	135032
E4	12	33368.2	130054
E5	12	29645.6	121500
E6	12	143669	138889
E7	12	45364.4	120560
E8	12	33065.2	125488
E9	12	33529.6	123851
E10	12	37381.2	123174
E11	12	37193	127023
E12	12	50818.6	137997
F1	12	47560.2	144097
F2	12	43319.4	134807
F3	12	34173	142324
F4	12	34378.5	133578
F5	12	29460.6	129774
F6	12	52660.1	129964
F7	12	28446.8	134242
F8	12	32390	128118
F9	12	33595.7	97035.3
F10	12	35118.6	134018
F11	12	32048.4	121169
F12	12	54554.1	135160
G1	12	38408.5	141991
G2	12	51717.8	147436
G3	12	39797.9	142802
G4	12	41998.6	140402
G5	12	30621.4	139769
G6	12	30900	132051
G7	12	29896.2	134541
G8	12	37855	143218
G9	12	39542.9	135067
G10	12	51151.6	142063
G11	12	67853.7	142718
G12	12	42545.5	153324
H1	12	56337.9	156620
H2	12	41682	157843
H3	12	36224.5	145041
H4	12	34974	144611
H5	12	36087.9	147535
H6	12	45146.6	153232
H7	12
H8	12
H9	12
H10	12
H11	12
H12	12
A1	13	19042.3	93383.3
A2	13	32557.4	121852
A3	13	32183.1	126405
A4	13	34670	120039
A5	13	34205.9	123622
A6	13	46859.8	142692
A7	13	36244.8	128088
A8	13	193872	417925
A9	13	43191	130672
A10	13	33243.9	132115
A11	13	32242.2	136505
A12	13	55708.3	140354
B1	13	34861.9	123695
B2	13	40143.5	128944
B3	13	32098.7	127225
B4	13	30331.1	123868
B5	13	33658.1	147599
B6	13	27055.8	127017
B7	13	29282.4	126334
B8	13	109446	412138
B9	13	36961.8	130443
B10	13	42061.4	134219
B11	13	48646.3	144103
B12	13	47224.7	147830
C1	13	38146.7	131918
C2	13	43953.6	181268
C3	13	37395.7	132893
C4	13	31822.6	120399
C5	13	31640.1	126467
C6	13	30326.6	126171
C7	13	30884.9	124269
C8	13	35755.2	129096
C9	13	42774.7	129386
C10	13	37969.7	134322
C11	13	35879.5	137090
C12	13	44963.4	147661
D1	13	42491.9	135377
D2	13	36217.5	136948
D3	13	43247.7	138190
D4	13	33800.3	127638
D5	13	35788.8	127194
D6	13	38373.3	122589
D7	13	28261.1	119746
D8	13	28515.9	117783
D9	13	34116.7	128208
D10	13	47762	132862
D11	13	47793.4	140828
D12	13	137036	148375
E1	13	44675.5	132406
E2	13	41630.8	125683
E3	13	66555.5	135306
E4	13	33453.6	129948
E5	13	29303.9	121503
E6	13	143720	138596
E7	13	45211.8	120344
E8	13	32818.2	125906
E9	13	33577	123655
E10	13	37268.8	122854
E11	13	37110.8	127029
E12	13	51161.5	138169
F1	13	47925	143999
F2	13	43235.8	134874
F3	13	33945.7	142521
F4	13	34589.9	133228
F5	13	29210.7	129618
F6	13	52585.7	129835
F7	13	28546.8	134877
F8	13	32426	128085
F9	13	33854.4	97397.5
F10	13	34904.1	133981
F11	13	32447.6	120957
F12	13	54993.1	135172
G1	13	38889.2	141490
G2	13	51955.1	147427
G3	13	39981.2	143172
G4	13	41767.1	140197
G5	13	30632.6	139519
G6	13	31112.1	132168
G7	13	29893	134623
G8	13	37692.9	143409
G9	13	39871.6	135226
G10	13	50952.3	141919
G11	13	67916.2	142703
G12	13	42965.1	153402
H1	13	56217.4	156130
H2	13	41490.8	157603
H3	13	36240.6	145161
H4	13	35020.7	144454
H5	13	36168.3	147742
H6	13	45622.1	153026
H7	13
H8	13
H9	13
H10	13
H11	13
H12	13
A1	14	19223	93676.6
A2	14	32758	121592
A3	14	31642.3	126507
A4	14	34720.8	119951
A5	14	34603	123327
A6	14	46876.8	143206
A7	14	36204	127689
A8	14	194465	417837
A9	14	42992.1	130863
A10	14	32850.6	132010
A11	14	31704.3	136490
A12	14	55918.9	140213
B1	14	34336	123623
B2	14	40097	129004
B3	14	32333.9	127226
B4	14	30214.4	123846
B5	14	33769.6	147771
B6	14	27091.4	126929
B7	14	28910.9	126385
B8	14	110399	411177
B9	14	36888.1	130258
B10	14	42411.8	134156
B11	14	48481.6	144299
B12	14	47464.7	147769
C1	14	37982.9	131932
C2	14	43987.3	180938
C3	14	37531.6	132831
C4	14	31318.4	120574
C5	14	31872.1	126708
C6	14	30366.1	126296
C7	14	30952.1	124031
C8	14	36026.2	129392
C9	14	42745.5	129566
C10	14	37823.6	134158
C11	14	36032.6	137387
C12	14	44974.8	148170
D1	14	42748.3	135448
D2	14	36548.7	137107
D3	14	43422.2	138300
D4	14	33630.8	127505
D5	14	35904.8	127292
D6	14	38484.4	123157
D7	14	28389.4	119684
D8	14	28450	118171
D9	14	34199.7	128829
D10	14	47935.4	132974
D11	14	48102.6	141039
D12	14	137410	148380
E1	14	44685.3	132179
E2	14	41840.8	125907
E3	14	66573	135436
E4	14	33311.8	129932
E5	14	29514.6	121841
E6	14	143115	138363
E7	14	45403	120578
E8	14	33018.6	125891
E9	14	33843.1	123981
E10	14	37550.9	123542
E11	14	37087	127097
E12	14	51210.6	138086
F1	14	47783.2	143892
F2	14	43432.2	135336
F3	14	34201.7	142694
F4	14	34569.1	133595
F5	14	29266.8	129763
F6	14	52382.2	129743
F7	14	28634.5	135247
F8	14	32417.3	127972
F9	14	33736.6	97304.8
F10	14	34820.7	133739
F11	14	32002.2	121463
F12	14	54447.7	135063
G1	14	39071.3	141933
G2	14	51765.1	147447
G3	14	40021.9	143182
G4	14	41977.9	140578
G5	14	30654.8	139524
G6	14	31200.4	132262
G7	14	29914.6	134454
G8	14	37698.3	143170
G9	14	39826.1	134993
G10	14	51003.5	141806
G11	14	67727.1	143080
G12	14	42565.4	153144
H1	14	56159.6	155619
H2	14	41529.9	157959
H3	14	36048.9	144846
H4	14	34964.8	144364
H5	14	36193	147753
H6	14	45698.2	153181
H7	14
H8	14
H9	14
H10	14
H11	14
H12	14
A1	15	19258	93498.9
A2	15	32684.1	122234
A3	15	32439.5	126720
A4	15	35206.1	119964
A5	15	34875.6	123148
A6	15	46879.4	143114
A7	15	36415.8	127803
A8	15	194982	417003
A9	15	43034.5	130462
A10	15	33061.9	131880
A11	15	31837.3	136720
A12	15	55541.7	139523
B1	15	34745.6	123599
B2	15	39616.4	129136
B3	15	32576	127187
B4	15	30369.5	123691
B5	15	33684.6	147559
B6	15	27024.3	127129
B7	15	29621.5	125841
B8	15	110356	410591
B9	15	36669.5	129800
B10	15	42437.1	134434
B11	15	48559.3	143844
B12	15	47428.3	147758
C1	15	38184.4	132045
C2	15	44524.8	180924
C3	15	37676.8	132455
C4	15	31678.3	120455
C5	15	31991.1	126602
C6	15	30287.5	125887
C7	15	30719.7	124248
C8	15	35780.5	128702
C9	15	42885.3	129277
C10	15	38034.4	133925
C11	15	35920.6	137158
C12	15	45021.7	147776
D1	15	42774.2	135489
D2	15	36771.5	136893
D3	15	43306.1	137417
D4	15	33950.3	127086
D5	15	35732.2	126976
D6	15	38391.9	122676
D7	15	28386.5	119511
D8	15	28519.8	117357
D9	15	34018.5	128546
D10	15	47810.4	132382
D11	15	48567.7	141295
D12	15	137805	148435
E1	15	44906.1	132000
E2	15	41706.1	125816
E3	15	66781.8	134857
E4	15	33432.4	129526
E5	15	29571.7	121477
E6	15	143906	138654
E7	15	45612.2	119981
E8	15	32832.4	125909
E9	15	33583.2	123593
E10	15	37671.2	123130
E11	15	36737.5	126931
E12	15	51357.3	138002
F1	15	48268.7	144045
F2	15	43513.7	135145
F3	15	34229.2	142523
F4	15	34639.8	133498
F5	15	29325.1	129566
F6	15	52621.5	130027
F7	15	28469.5	135602
F8	15	32190.9	128021
F9	15	33711.8	97255.4
F10	15	35045.6	133866
F11	15	31952.1	121015
F12	15	54984.5	134796
G1	15	39047	141738
G2	15	51835.8	147618
G3	15	40011.7	142899
G4	15	40351.3	140224
G5	15	30396.6	139307
G6	15	31081.7	132006
G7	15	29771.4	134093
G8	15	37706	143250
G9	15	39851	134934
G10	15	50952.3	141865
G11	15	68060.2	142951
G12	15	42662.4	153118
H1	15	56124.3	155916
H2	15	41661.8	157843
H3	15	36016.1	144911
H4	15	34852.5	144410
H5	15	36183.6	147590
H6	15	45748.2	153202
H7	15
H8	15
H9	15
H10	15
H11	15
H12	15
A1	16	19547.5	93155.9
A2	16	32506.6	122125
A3	16	31961.8	127032
A4	16	35138.5	120029
A5	16	34920.3	123477
A6	16	47116.6	143079
A7	16	36482.1	127752
A8	16	196242	417208
A9	16	43238.2	130769
A10	16	33259.3	132364
A11	16	32069.4	136539
A12	16	55805.8	139844
B1	16	34529.6	123074
B2	16	40243	129243
B3	16	32366.2	127359
B4	16	30461.6	123557
B5	16	33644.9	147922
B6	16	26803.4	126947
B7	16	29412.3	126147
B8	16	111120	411766
B9	16	36800.6	130202
B10	16	42178.6	134212
B11	16	48219	144042
B12	16	47273.9	148163
C1	16	38252.4	131670
C2	16	44485.2	180807
C3	16	37435	132786
C4	16	31568.4	120659
C5	16	31824.1	126801
C6	16	30438.1	126058
C7	16	30751.9	124255
C8	16	35873.6	129115
C9	16	43082.2	129456
C10	16	38146.6	133895
C11	16	35577.7	137259
C12	16	44996.3	147899
D1	16	42929.4	135497
D2	16	36990	137185
D3	16	43600.2	138252
D4	16	33707.9	127368
D5	16	35844.5	127005
D6	16	38505.1	122733
D7	16	28295.5	119580
D8	16	28819.7	117779
D9	16	34326.6	129735
D10	16	47526.8	133366
D11	16	48180.8	141353
D12	16	137970	149015
E1	16	44557.8	132404
E2	16	41946.8	125777
E3	16	66838.5	135226
E4	16	33565.3	129794
E5	16	29555.3	121431
E6	16	143401	138866
E7	16	45839.4	120640
E8	16	32973.2	125804
E9	16	34018.4	123676
E10	16	37480.9	123148
E11	16	37130.7	126793
E12	16	51474.6	137944
F1	16	48038.5	144066
F2	16	43348.9	135320
F3	16	34094.5	142666
F4	16	34707.4	133529
F5	16	29423.3	129484
F6	16	52479.2	129918
F7	16	28764	136137
F8	16	32416.9	128113
F9	16	34155.9	97298.2
F10	16	34864.4	134141
F11	16	31918.6	121215
F12	16	54912.9	134793
G1	16	39296.9	141813
G2	16	51856.8	147528
G3	16	40212.9	143018
G4	16	41972.5	140370
G5	16	30592.6	139474
G6	16	31120.6	132357
G7	16	29908.4	134164
G8	16	37675.1	143258
G9	16	39605.5	135158
G10	16	51103.1	141910
G11	16	67909	142929
G12	16	42681	153011
H1	16	56183.1	155689
H2	16	41909.9	157517
H3	16	35918	144851
H4	16	35048.2	144271
H5	16	36346.4	147715
H6	16	46155.8	153082
H7	16
H8	16
H9	16
H10	16
H11	16
H12	16
A1	17	18904.4	93315.1
A2	17	32589.3	122381
A3	17	32360.4	126747
A4	17	36328.6	120294
A5	17	35175.4	123310
A6	17	47380.3	143064
A7	17	36441.2	127865
A8	17	195432	417098
A9	17	43284.9	130738
A10	17	32944.5	131566
A11	17	31484.7	136326
A12	17	55913.4	139896
B1	17	34607.1	123591
B2	17	40008.5	129482
B3	17	32423	127697
B4	17	30496.9	123587
B5	17	33989.6	147724
B6	17	27023	126962
B7	17	29392.9	126348
B8	17	109220	410786
B9	17	37073.8	130071
B10	17	42618.3	133943
B11	17	48671.4	144270
B12	17	47776	147903
C1	17	37962.6	131955
C2	17	44046.9	181101
C3	17	37755.8	132539
C4	17	31674.3	120422
C5	17	31823.7	126428
C6	17	30406.8	126139
C7	17	31042.7	124148
C8	17	35952.6	128898
C9	17	42845.7	129558
C10	17	38051.7	134306
C11	17	35852.8	137222
C12	17	45244.1	147712
D1	17	43312	135530
D2	17	36593.2	137060
D3	17	43417.7	137944
D4	17	33892.7	127371
D5	17	35902	127464
D6	17	38426.2	122741
D7	17	28257.6	119887
D8	17	28401.4	117914
D9	17	34646.3	129730
D10	17	47439.4	133021
D11	17	48271.4	141103
D12	17	137789	148515
E1	17	44992.6	132221
E2	17	41759	125761
E3	17	66725.9	135432
E4	17	33613	129683
E5	17	29375	121752
E6	17	143677	138383
E7	17	45399.8	120743
E8	17	33011.2	126151
E9	17	33815.9	123998
E10	17	37134.2	123277
E11	17	37348	127106
E12	17	51589.6	137745
F1	17	47890.5	144025
F2	17	43701.2	134932
F3	17	34311.5	142537
F4	17	34551.1	133737
F5	17	29369.2	129667
F6	17	52460.9	130078
F7	17	29085.6	136614
F8	17	32358.7	127957
F9	17	34308.6	97340
F10	17	34819.2	133930
F11	17	32070	121219
F12	17	54891.1	135082
G1	17	38982.8	141679
G2	17	52154	147651
G3	17	40371.1	143074
G4	17	41838.4	140209
G5	17	30404.5	139446
G6	17	31124.6	132295
G7	17	30199.3	134504
G8	17	37759.4	142910
G9	17	39637.6	135262
G10	17	51381.1	142221
G11	17	68323.4	142828
G12	17	42472.2	153070
H1	17	56448.8	155887
H2	17	41341.4	157330
H3	17	35919.6	144892
H4	17	34892.9	144707
H5	17	36303.4	147790
H6	17	46103.1	153279
H7	17
H8	17
H9	17
H10	17
H11	17
H12	17
A1	18	19033.4	93237.6
A2	18	32751.1	121832
A3	18	32359	127003
A4	18	36722.1	120159
A5	18	36495.9	123141
A6	18	48727.7	142831
A7	18	36203.2	127816
A8	18	195423	418104
A9	18	43127.4	130582
A10	18	32964.5	131879
A11	18	31902.3	136498
A12	18	55662.7	139605
B1	18	34792.2	123640
B2	18	40456.4	129384
B3	18	32776.3	127308
B4	18	30476.5	123621
B5	18	33800	147548
B6	18	26814	126854
B7	18	29554	126205
B8	18	110687	412217
B9	18	37272	130537
B10	18	42275.4	134271
B11	18	48485.3	144194
B12	18	47128.1	147970
C1	18	38027.8	132220
C2	18	44401.4	181128
C3	18	37707.8	132234
C4	18	31579.2	120592
C5	18	31939.4	126441
C6	18	30332.4	125915
C7	18	31063.6	123876
C8	18	35888.4	128809
C9	18	42778.2	129366
C10	18	37733.7	134251
C11	18	36041.2	137043
C12	18	44793.9	147699
D1	18	43252.2	135757
D2	18	37152.3	137438
D3	18	43373	138156
D4	18	34181.4	127185
D5	18	36037.2	127196
D6	18	38573.3	122518
D7	18	28193.1	119730
D8	18	28579.7	117604
D9	18	34606.3	130051
D10	18	47484.6	132975
D11	18	47899.2	141366
D12	18	138563	148780
E1	18	44760.3	132299
E2	18	41560.8	125723
E3	18	66781.3	135317
E4	18	33420.7	129614
E5	18	29336.6	121630
E6	18	143218	138217
E7	18	45505.4	120361
E8	18	33088.9	125989
E9	18	33893.9	123939
E10	18	37615.1	123317
E11	18	36789.1	126665
E12	18	51621.8	137598
F1	18	48172.8	143885
F2	18	44176.7	135149
F3	18	34368.5	142552
F4	18	34660	133742
F5	18	29642.2	129536
F6	18	52524.5	129897
F7	18	28998.7	137161
F8	18	32644.6	128151
F9	18	34234.2	97209.2
F10	18	34852.7	133680
F11	18	31514.8	121386
F12	18	54780.2	134945
G1	18	39151.1	141835
G2	18	52477.8	147705
G3	18	40758.1	143033
G4	18	41328.6	140290
G5	18	30647.3	139516
G6	18	30884.3	132291
G7	18	30230.6	134185
G8	18	37572.1	143156
G9	18	39496.9	134756
G10	18	51024.5	142080
G11	18	68414.5	142982
G12	18	42494.7	152678
H1	18	55847.5	155452
H2	18	41321.2	157701
H3	18	36028.9	144633
H4	18	34992.9	144563
H5	18	36146.8	147658
H6	18	45798.2	153180
H7	18
H8	18
H9	18
H10	18
H11	18
H12	18
A1	19	19188.9	93126.1
A2	19	32816.7	122069
A3	19	32325.7	126946
A4	19	38874.1	120380
A5	19	38653.1	123194
A6	19	51127.6	143307
A7	19	36336.6	128116
A8	19	196255	416818
A9	19	43196	130754
A10	19	33612.5	132170
A11	19	32084.7	136732
A12	19	55513.4	139915
B1	19	34810.5	122928
B2	19	40059.4	129040
B3	19	32603.1	127610
B4	19	30973.1	124101
B5	19	33916.4	147730
B6	19	27420.7	126966
B7	19	29936.1	125847
B8	19	112105	411620
B9	19	37778.3	130320
B10	19	42199.7	134198
B11	19	48462.9	144504
B12	19	47473.4	147894
C1	19	38505.1	131808
C2	19	44866.5	181968
C3	19	37744.7	132328
C4	19	31626.1	120184
C5	19	31981.6	126660
C6	19	30239.1	125864
C7	19	31190.4	124141
C8	19	35937.2	129032
C9	19	42806.9	129656
C10	19	37743.2	134219
C11	19	35914.1	137097
C12	19	45061	147843
D1	19	43704.8	135834
D2	19	37190	137327
D3	19	44200.3	138392
D4	19	34085.3	127359
D5	19	36032.4	127016
D6	19	38548.3	122788
D7	19	28565.8	119578
D8	19	28774.7	117650
D9	19	34858.8	130661
D10	19	47436.7	133466
D11	19	48477.4	141348
D12	19	138696	148608
E1	19	44436.6	132210
E2	19	41676.6	125612
E3	19	66798.4	135219
E4	19	33768	129744
E5	19	29533.7	121844
E6	19	143185	138363
E7	19	45595.2	120461
E8	19	32886.2	125952
E9	19	33968.6	123953
E10	19	37475	123084
E11	19	37412.2	126926
E12	19	52127.4	137890
F1	19	48320.9	144258
F2	19	43910.7	135191
F3	19	34618	142684
F4	19	34669.4	133631
F5	19	29647.2	129856
F6	19	52677	129674
F7	19	29460.4	137621
F8	19	33008.8	128236
F9	19	35449.7	97395.6
F10	19	34954.9	133623
F11	19	32165.7	121353
F12	19	54985.6	134929
G1	19	40089.6	141971
G2	19	52840.3	147530
G3	19	41276.2	142970
G4	19	40725.2	140536
G5	19	30499.5	139441
G6	19	30987.8	131975
G7	19	29889.1	134435
G8	19	37621.3	142775
G9	19	40116.3	134954
G10	19	50887.8	141805
G11	19	68642.2	142795
G12	19	42775	153173
H1	19	56094.3	155471
H2	19	41443.8	157620
H3	19	35787.9	145154
H4	19	35079.6	144340
H5	19	36512.5	147623
H6	19	45955	152890
H7	19
H8	19
H9	19
H10	19
H11	19
H12	19
A1	20	19148.6	93339.4
A2	20	32477	121488
A3	20	32133.5	126735
A4	20	42484.1	120506
A5	20	42090.9	123480
A6	20	55449.5	142954
A7	20	36332.1	127768
A8	20	195586	417710
A9	20	43331.8	130709
A10	20	32944.8	132061
A11	20	31635.7	136218
A12	20	54999.7	139520
B1	20	34527.9	123361
B2	20	40579	129094
B3	20	32766.4	127251
B4	20	30751	123751
B5	20	34280	148136
B6	20	27359.4	127033
B7	20	31140.1	126337
B8	20	114927	411557
B9	20	38700.7	130170
B10	20	42280.8	134134
B11	20	48585.9	144071
B12	20	47225.2	147621
C1	20	38747.3	131645
C2	20	44617.2	181866
C3	20	37499	132654
C4	20	31701.6	120560
C5	20	31512.6	126556
C6	20	30295.9	125823
C7	20	30846.9	124138
C8	20	35900.4	129087
C9	20	42765.9	129228
C10	20	38191	134186
C11	20	36041.9	137271
C12	20	45097.2	148002
D1	20	43754	135611
D2	20	37258.7	137297
D3	20	44360.3	138280
D4	20	34470.9	127306
D5	20	36229.4	127264
D6	20	39041.2	122751
D7	20	28931.3	119714
D8	20	29067	117877
D9	20	35235.2	131410
D10	20	47863.8	132893
D11	20	48229.8	141294
D12	20	138975	148852
E1	20	45134.5	132267
E2	20	41650.6	126213
E3	20	66890.6	135698
E4	20	33306.6	130045
E5	20	29767.5	121716
E6	20	143462	138435
E7	20	45409.5	120464
E8	20	33142.3	126009
E9	20	33900.3	124076
E10	20	37504.5	123247
E11	20	37160.7	126876
E12	20	51777.8	137983
F1	20	49418.6	143589
F2	20	44595.2	135200
F3	20	35364.9	142222
F4	20	34775.9	133405
F5	20	29412.4	129717
F6	20	52605.6	129984
F7	20	29687.8	137824
F8	20	32982.3	128044
F9	20	36439.2	97496.8
F10	20	34971.3	134205
F11	20	31995.8	121315
F12	20	54903.3	135000
G1	20	40914.5	141701
G2	20	54459	147790
G3	20	42482.3	142922
G4	20	41584.7	140442
G5	20	30514.1	139390
G6	20	31301.7	132104
G7	20	30081.3	134560
G8	20	37851	143172
G9	20	39796	135019
G10	20	51355.7	141957
G11	20	68365.3	142765
G12	20	42782.6	153185
H1	20	55614	155396
H2	20	41926.2	157328
H3	20	36146.4	144901
H4	20	34972.6	144355
H5	20	36470	147820
H6	20	46182.1	153142
H7	20
H8	20
H9	20
H10	20
H11	20
H12	20
A1	21	19109	92830.6
A2	21	33052.6	122280
A3	21	32833.6	126754
A4	21	49239.7	120187
A5	21	49089.5	123260
A6	21	63422.8	143061
A7	21	36332.9	127614
A8	21	196986	417838
A9	21	43899.1	130416
A10	21	32867.3	131915
A11	21	31447.9	136478
A12	21	55757.3	139914
B1	21	35255.5	123381
B2	21	41241.5	129200
B3	21	32863.8	127247
B4	21	31598.2	123749
B5	21	34660.9	147754
B6	21	28120.2	126818
B7	21	32841.4	125881
B8	21	119463	409952
B9	21	40377.3	130220
B10	21	42094.5	134243
B11	21	48610.7	143774
B12	21	47640.9	148024
C1	21	38650.6	132062
C2	21	44885.7	180424
C3	21	38049.5	132687
C4	21	31611.9	120287
C5	21	31840	126494
C6	21	30197.8	125860
C7	21	31058	123959
C8	21	36149.6	129048
C9	21	42780.4	129914
C10	21	37708.7	134141
C11	21	35756.3	137535
C12	21	45322.1	147854
D1	21	44493.9	135766
D2	21	38028.4	137397
D3	21	44730.3	138123
D4	21	34807	127180
D5	21	36459	126840
D6	21	39301.8	122789
D7	21	29219.1	119682
D8	21	29622.7	117714
D9	21	35692.8	131640
D10	21	47427.4	132751
D11	21	47982.1	141068
D12	21	138754	148578
E1	21	44966.6	132475
E2	21	41781.8	125706
E3	21	66816	135394
E4	21	33848.4	129562
E5	21	29917.3	121111
E6	21	143281	138380
E7	21	45863.3	120152
E8	21	33100.3	125747
E9	21	34142	123807
E10	21	37553.9	122946
E11	21	37051.3	126965
E12	21	52157.3	137961
F1	21	50451.4	144461
F2	21	45481.5	134943
F3	21	36388.7	142737
F4	21	34616.6	133918
F5	21	29465.9	129704
F6	21	52605	129933
F7	21	30996.7	138268
F8	21	33978.1	128251
F9	21	39439.1	97274.5
F10	21	34863.6	134280
F11	21	31882.8	121330
F12	21	54844	134620
G1	21	43202.9	141978
[truncated: 10,391 more rows]

## Sheet: Amplification Data
Block Type	96alum
Chemistry	SYBR_GREEN
Experiment File Name	D:\ShuJu\LZM\spx 11-15zuzhi teyi.eds
Experiment Run End Time	2023-07-14 09:22:46 AM CST
Instrument Type	sds7500
Passive Reference	ROX
Well	Cycle	Target Name	Rn	ΔRn
A1	1	spx11	0.201635	-0.000684302
A1	2	spx11	0.202089	-0.00048712
A1	3	spx11	0.201586	-0.00124771
A1	4	spx11	0.205445	0.00235373
A1	5	spx11	0.198461	-0.00488681
A1	6	spx11	0.204201	0.000596055
A1	7	spx11	0.204867	0.00100419
A1	8	spx11	0.20563	0.0015098
A1	9	spx11	0.205948	0.0015705
A1	10	spx11	0.205186	0.000551987
A1	11	spx11	0.208755	0.00386372
A1	12	spx11	0.205115	-3.36381e-05
A1	13	spx11	0.203915	-0.00149101
A1	14	spx11	0.205206	-0.00045693
A1	15	spx11	0.205971	5.03299e-05
A1	16	spx11	0.209837	0.00365924
A1	17	spx11	0.202586	-0.00384858
A1	18	spx11	0.204139	-0.00255328
A1	19	spx11	0.206053	-0.000896808
A1	20	spx11	0.20515	-0.00205621
A1	21	spx11	0.205848	-0.00161637
A1	22	spx11	0.203567	-0.00415425
A1	23	spx11	0.211232	0.00325404
A1	24	spx11	0.208695	0.00045886
A1	25	spx11	0.212256	0.00376343
A1	26	spx11	0.209356	0.000605701
A1	27	spx11	0.214214	0.00520625
A1	28	spx11	0.227096	0.0178315
A1	29	spx11	0.244202	0.0346802
A1	30	spx11	0.266118	0.0563388
A1	31	spx11	0.311541	0.101504
A1	32	spx11	0.35998	0.149687
A1	33	spx11	0.428812	0.218261
A1	34	spx11	0.495294	0.284486
A1	35	spx11	0.561179	0.350113
A1	36	spx11	0.627682	0.416359
A1	37	spx11	0.691203	0.479623
A1	38	spx11	0.797079	0.585242
A1	39	spx11	0.882526	0.670432
A1	40	spx11	0.986051	0.7737
A2	1	spx11	0.2595	-0.0059859
A2	2	spx11	0.265549	-0.000204975
A2	3	spx11	0.261777	-0.00424448
A2	4	spx11	0.267415	0.00112563
A2	5	spx11	0.26871	0.00215279
A2	6	spx11	0.271688	0.00486375
A2	7	spx11	0.266873	-0.000219159
A2	8	spx11	0.267881	0.000521125
A2	9	spx11	0.266643	-0.000985001
A2	10	spx11	0.270239	0.00234296
A2	11	spx11	0.269647	0.00148375
A2	12	spx11	0.270811	0.00237949
A2	13	spx11	0.267189	-0.00151026
A2	14	spx11	0.26941	0.000443129
A2	15	spx11	0.26739	-0.00184456
A2	16	spx11	0.266174	-0.00332804
A2	17	spx11	0.266292	-0.00347735
A2	18	spx11	0.268823	-0.00121495
A2	19	spx11	0.268837	-0.00146848
A2	20	spx11	0.267327	-0.00324557
A2	21	spx11	0.270303	-0.000537318
A2	22	spx11	0.268794	-0.00231476
A2	23	spx11	0.270823	-0.00055375
A2	24	spx11	0.27232	0.00067565
A2	25	spx11	0.27167	-0.000241612
A2	26	spx11	0.281377	0.00919702
A2	27	spx11	0.284672	0.0122243
A2	28	spx11	0.299535	0.0268202
A2	29	spx11	0.318421	0.0454383
A2	30	spx11	0.351267	0.0780165
A2	31	spx11	0.410887	0.137369
A2	32	spx11	0.484095	0.210309
A2	33	spx11	0.580831	0.306777
A2	34	spx11	0.691866	0.417544
A2	35	spx11	0.801162	0.526573
A2	36	spx11	0.884165	0.609308
A2	37	spx11	0.986302	0.711177
A2	38	spx11	1.12904	0.853652
A2	39	spx11	1.2506	0.974937
A2	40	spx11	1.40323	1.1273
A3	1	spx11	0.245068	-0.0045068
A3	2	spx11	0.246667	-0.00324013
A3	3	spx11	0.246744	-0.00349541
A3	4	spx11	0.248187	-0.00238602
A3	5	spx11	0.251937	0.00103196
A3	6	spx11	0.253028	0.00178985
A3	7	spx11	0.252564	0.000993591
A3	8	spx11	0.253865	0.00196186
A3	9	spx11	0.25441	0.00217417
A3	10	spx11	0.254226	0.00165745
A3	11	spx11	0.253498	0.000597024
A3	12	spx11	0.253594	0.000359853
A3	13	spx11	0.254603	0.00103681
A3	14	spx11	0.250124	-0.00377529
A3	15	spx11	0.255994	0.00176246
A3	16	spx11	0.251604	-0.00296044
A3	17	spx11	0.255315	0.000418244
A3	18	spx11	0.254789	-0.00044117
A3	19	spx11	0.254642	-0.000920813
A3	20	spx11	0.253549	-0.00234623
A3	21	spx11	0.259034	0.00280626
A3	22	spx11	0.255464	-0.00109624
A3	23	spx11	0.258438	0.00154466
A3	24	spx11	0.252764	-0.00446147
A3	25	spx11	0.258285	0.000726782
A3	26	spx11	0.260913	0.00302212
A3	27	spx11	0.264454	0.00623022
A3	28	spx11	0.276071	0.017515
A3	29	spx11	0.290438	0.0315493
A3	30	spx11	0.313806	0.0545841
A3	31	spx11	0.355473	0.0959189
A3	32	spx11	0.415933	0.156046
A3	33	spx11	0.491588	0.231368
A3	34	spx11	0.598038	0.337485
A3	35	spx11	0.704656	0.443771
A3	36	spx11	0.790887	0.52967
A3	37	spx11	0.883781	0.622231
A3	38	spx11	1.0135	0.751616
A3	39	spx11	1.12113	0.858911
A3	40	spx11	1.27559	1.01304
A4	1	spx12	0.273733	-0.0067088
A4	2	spx12	0.277972	-0.00334273
A4	3	spx12	0.282518	0.000330879
A4	4	spx12	0.286297	0.0032363
A4	5	spx12	0.282829	-0.00110391
A4	6	spx12	0.287567	0.00276136
A4	7	spx12	0.284714	-0.000965101
A4	8	spx12	0.28836	0.0018088
A4	9	spx12	0.28823	0.000805621
A4	10	spx12	0.283528	-0.00476921
A4	11	spx12	0.286663	-0.00250752
A4	12	spx12	0.287253	-0.00278969
A4	13	spx12	0.288822	-0.0020936
A4	14	spx12	0.28946	-0.00232911
A4	15	spx12	0.293471	0.000809724
A4	16	spx12	0.292749	-0.000785153
A4	17	spx12	0.301998	0.0075906
A4	18	spx12	0.305611	0.0103315
A4	19	spx12	0.322929	0.0267763
A4	20	spx12	0.352548	0.0555228
A4	21	spx12	0.409692	0.111793
A4	22	spx12	0.510175	0.211404
A4	23	spx12	0.668236	0.368592
A4	24	spx12	0.895538	0.595021
A4	25	spx12	1.14613	0.844736
A4	26	spx12	1.3395	1.03724
A4	27	spx12	1.50394	1.2008
A4	28	spx12	1.66836	1.36435
A4	29	spx12	1.81313	1.50825
A4	30	spx12	1.9273	1.62155
A4	31	spx12	2.04086	1.73423
A4	32	spx12	2.1301	1.8226
A4	33	spx12	2.20596	1.89758
A4	34	spx12	2.26331	1.95407
A4	35	spx12	2.32747	2.01735
A4	36	spx12	2.3643	2.05331
A4	37	spx12	2.41353	2.10166
A4	38	spx12	2.45001	2.13727
A4	39	spx12	2.47012	2.15651
A4	40	spx12	2.4974	2.18291
A5	1	spx12	0.261931	-0.00693564
A5	2	spx12	0.26649	-0.00328585
A5	3	spx12	0.269322	-0.00136234
A5	4	spx12	0.269019	-0.00257453
A5	5	spx12	0.274254	0.00175148
A5	6	spx12	0.275604	0.00219197
A5	7	spx12	0.27656	0.00223875
A5	8	spx12	0.27568	0.000450478
A5	9	spx12	0.27538	-0.000758525
A5	10	spx12	0.276221	-0.000826993
A5	11	spx12	0.279095	0.00113744
A5	12	spx12	0.277887	-0.00097886
A5	13	spx12	0.276698	-0.00307752
A5	14	spx12	0.28058	-0.000104634
A5	15	spx12	0.283201	0.00160786
A5	16	spx12	0.282808	0.000305422
A5	17	spx12	0.285261	0.00184911
A5	18	spx12	0.296374	0.0120537
A5	19	spx12	0.313759	0.0285291
A5	20	spx12	0.340871	0.0547323
A5	21	spx12	0.398261	0.111213
A5	22	spx12	0.505832	0.217875
A5	23	spx12	0.669676	0.38081
A5	24	spx12	0.903675	0.613899
A5	25	spx12	1.14849	0.857804
A5	26	spx12	1.35524	1.06365
A5	27	spx12	1.5144	1.2219
A5	28	spx12	1.68027	1.38685
A5	29	spx12	1.83293	1.53861
A5	30	spx12	1.94041	1.64518
A5	31	spx12	2.05416	1.75802
A5	32	spx12	2.1439	1.84685
A5	33	spx12	2.21145	1.9135
A5	34	spx12	2.28658	1.98771
A5	35	spx12	2.34101	2.04123
A5	36	spx12	2.38737	2.08669
A5	37	spx12	2.42298	2.12139
A5	38	spx12	2.46051	2.15801
A5	39	spx12	2.48156	2.17815
A5	40	spx12	2.50988	2.20556
A6	1	spx12	0.306761	-0.00980674
A6	2	spx12	0.31362	-0.00377385
A6	3	spx12	0.31794	-0.000280505
A6	4	spx12	0.31851	-0.000536473
A6	5	spx12	0.321294	0.00142122
A6	6	spx12	0.32194	0.00124095
A6	7	spx12	0.320772	-0.000753599
A6	8	spx12	0.323269	0.000917601
A6	9	spx12	0.323935	0.000756345
A6	10	spx12	0.322386	-0.00161827
A6	11	spx12	0.323918	-0.000912666
A6	12	spx12	0.322313	-0.00334423
A6	13	spx12	0.328399	0.00191523
A6	14	spx12	0.327338	2.82069e-05
A6	15	spx12	0.327566	-0.000569862
A6	16	spx12	0.329305	0.000342273
A6	17	spx12	0.331183	0.00139379
A6	18	spx12	0.341155	0.0105398
A6	19	spx12	0.356768	0.0253267
A6	20	spx12	0.387884	0.0556159
A6	21	spx12	0.443327	0.110233
A6	22	spx12	0.544445	0.210524
A6	23	spx12	0.695154	0.360407
A6	24	spx12	0.912099	0.576525
A6	25	spx12	1.13493	0.798534
A6	26	spx12	1.31844	0.981217
A6	27	spx12	1.478	1.13995
A6	28	spx12	1.61995	1.28108
A6	29	spx12	1.75821	1.4185
A6	30	spx12	1.86162	1.52109
A6	31	spx12	1.96182	1.62046
A6	32	spx12	2.0439	1.70171
A6	33	spx12	2.11212	1.76911
A6	34	spx12	2.17335	1.82951
A6	35	spx12	2.22288	1.87822
A6	36	spx12	2.26955	1.92406
A6	37	spx12	2.30279	1.95648
A6	38	spx12	2.33988	1.99274
A6	39	spx12	2.35357	2.0056
A6	40	spx12	2.38215	2.03336
A7	1	spx13	0.269303	-0.00775054
A7	2	spx13	0.273856	-0.00368836
A7	3	spx13	0.275897	-0.00213673
A7	4	spx13	0.278285	-0.000239359
A7	5	spx13	0.280557	0.00154235
A7	6	spx13	0.280302	0.000797112
A7	7	spx13	0.281442	0.00144725
A7	8	spx13	0.279647	-0.000837302
A7	9	spx13	0.281663	0.000688163
A7	10	spx13	0.280856	-0.000608712
A7	11	spx13	0.2831	0.00114483
A7	12	spx13	0.281628	-0.000816965
A7	13	spx13	0.282967	3.21056e-05
A7	14	spx13	0.283532	0.000106406
A7	15	spx13	0.284937	0.00102179
A7	16	spx13	0.28557	0.00116442
A7	17	spx13	0.284997	0.000101765
A7	18	spx13	0.283244	-0.00214166
A7	19	spx13	0.283623	-0.00225297
A7	20	spx13	0.28436	-0.00200585
A7	21	spx13	0.28471	-0.00214541
A7	22	spx13	0.28806	0.000714365
A7	23	spx13	0.29226	0.0044244
A7	24	spx13	0.29445	0.0061243
A7	25	spx13	0.307342	0.0185254
A7	26	spx13	0.33131	0.0420034
A7	27	spx13	0.375581	0.085785
A7	28	spx13	0.457008	0.166721
A7	29	spx13	0.608859	0.318082
A7	30	spx13	0.847074	0.555807
A7	31	spx13	1.20337	0.911616
A7	32	spx13	1.57562	1.28338
A7	33	spx13	1.86006	1.56732
A7	34	spx13	2.05824	1.76501
A7	35	spx13	2.19886	1.90514
A7	36	spx13	2.30075	2.00654
A7	37	spx13	2.38382	2.08912
A7	38	spx13	2.44548	2.15029
A7	39	spx13	2.49803	2.20235
A7	40	spx13	2.54197	2.2458
A8	1	spx13	0.435866	-0.01521
A8	2	spx13	0.441572	-0.0105995
A8	3	spx13	0.446522	-0.00674602
A8	4	spx13	0.450051	-0.00431241
A8	5	spx13	0.454615	-0.000844652
A8	6	spx13	0.458089	0.00153413
A8	7	spx13	0.458798	0.00114686
A8	8	spx13	0.462005	0.00325825
A8	9	spx13	0.463713	0.00386972
A8	10	spx13	0.466114	0.00517505
A8	11	spx13	0.462228	0.000193279
A8	12	spx13	0.464612	0.00148108
A8	13	spx13	0.463891	-0.000335651
A8	14	spx13	0.465409	8.65447e-05
A8	15	spx13	0.467579	0.00116123
A8	16	spx13	0.47037	0.00285646
A8	17	spx13	0.468552	-5.79788e-05
A8	18	spx13	0.467402	-0.00230333
A8	19	spx13	0.47084	3.84335e-05
A8	20	spx13	0.468234	-0.00366318
A8	21	spx13	0.47144	-0.00155337
A8	22	spx13	0.471882	-0.00220724
A8	23	spx13	0.476408	0.00122278
A8	24	spx13	0.481613	0.00533182
A8	25	spx13	0.495661	0.018284
A8	26	spx13	0.513959	0.0354859
A8	27	spx13	0.555203	0.0756346
A8	28	spx13	0.638419	0.157754
A8	29	spx13	0.782854	0.301093
A8	30	spx13	1.02323	0.54037
A8	31	spx13	1.36099	0.877035
A8	32	spx13	1.72517	1.24012
A8	33	spx13	2.00881	1.52266
A8	34	spx13	2.19842	1.71118
A8	35	spx13	2.33772	1.84938
A8	36	spx13	2.44107	1.95164
A8	37	spx13	2.50632	2.0158
A8	38	spx13	2.57852	2.0869
A8	39	spx13	2.62242	2.1297
A8	40	spx13	2.65188	2.15807
A9	1	spx13	0.303044	-0.0121799
A9	2	spx13	0.305968	-0.0102766
A9	3	spx13	0.313984	-0.00328214
A9	4	spx13	0.315339	-0.00294879
A9	5	spx13	0.319034	-0.000274672
A9	6	spx13	0.319609	-0.000720593
A9	7	spx13	0.322732	0.00138075
A9	8	spx13	0.322567	0.000195525
A9	9	spx13	0.326086	0.00269267
A9	10	spx13	0.32763	0.00321539
A9	11	spx13	0.328075	0.00263992
A9	12	spx13	0.326794	0.000337372
A9	13	spx13	0.330529	0.00305077
A9	14	spx13	0.328527	2.84348e-05
A9	15	spx13	0.329862	0.000342295
A9	16	spx13	0.330645	0.000104007
A9	17	spx13	0.331083	-0.000479719
A9	18	spx13	0.330271	-0.00231243
A9	19	spx13	0.330362	-0.00324276
A9	20	spx13	0.331515	-0.00311117
A9	21	spx13	0.336607	0.000960168
A9	22	spx13	0.336214	-0.00045388
A9	23	spx13	0.339568	0.00187885
A9	24	spx13	0.345409	0.00669873
A9	25	spx13	0.358867	0.0191348
A9	26	spx13	0.383793	0.0430404
A9	27	spx13	0.429825	0.0880512
A9	28	spx13	0.516289	0.173493
A9	29	spx13	0.671124	0.327308
A9	30	spx13	0.922177	0.577339
A9	31	spx13	1.27522	0.92936
A9	32	spx13	1.65062	1.30374
A9	33	spx13	1.93009	1.58218
A9	34	spx13	2.10839	1.75946
A9	35	spx13	2.25098	1.90103
A9	36	spx13	2.35993	2.00896
A9	37	spx13	2.43662	2.08464
A9	38	spx13	2.49249	2.13949
A9	39	spx13	2.54967	2.19564
A9	40	spx13	2.58291	2.22786
A10	1	spx14	0.235772	-0.00725383
A10	2	spx14	0.239679	-0.00381557
A10	3	spx14	0.241195	-0.00276909
A10	4	spx14	0.241931	-0.00250116
A10	5	spx14	0.244709	-0.000192082
A10	6	spx14	0.244517	-0.000853091
A10	7	spx14	0.245958	0.000118426
A10	8	spx14	0.24854	0.00223244
A10	9	spx14	0.248169	0.00139244
A10	10	spx14	0.246765	-0.000481119
A10	11	spx14	0.248742	0.00102721
A10	12	spx14	0.250997	0.002814
A10	13	spx14	0.251627	0.00297506
A10	14	spx14	0.24885	-0.0002716
A10	15	spx14	0.250696	0.00110629
A10	16	spx14	0.251272	0.00121298
A10	17	spx14	0.250403	-0.000124955
A10	18	spx14	0.249961	-0.00103595
A10	19	spx14	0.254313	0.00284721
A10	20	spx14	0.249466	-0.00246843
A10	21	spx14	0.249155	-0.0032482
A10	22	spx14	0.25071	-0.00216248
A10	23	spx14	0.25285	-0.00049104
A10	24	spx14	0.254713	0.000903446
A10	25	spx14	0.251592	-0.00268719
A10	26	spx14	0.255824	0.00107589
A10	27	spx14	0.256798	0.00158096
A10	28	spx14	0.263476	0.00779007
A10	29	spx14	0.275404	0.0192501
A10	30	spx14	0.290996	0.0343732
A10	31	spx14	0.333133	0.0760405
A10	32	spx14	0.410263	0.152702
A10	33	spx14	0.540182	0.282152
A10	34	spx14	0.755072	0.496573
A10	35	spx14	1.04598	0.787009
A10	36	spx14	1.30293	1.0435
A10	37	spx14	1.47714	1.21723
A10	38	spx14	1.64758	1.3872
A10	39	spx14	1.77596	1.51512
A10	40	spx14	1.90399	1.64268
A11	1	spx14	0.227403	-0.00316498
A11	2	spx14	0.230265	-0.00060445
A11	3	spx14	0.231359	0.000187384
A11	4	spx14	0.230026	-0.00144729
A11	5	spx14	0.234082	0.00230781
A11	6	spx14	0.235006	0.00293011
A11	7	spx14	0.234442	0.00206414
A11	8	spx14	0.23364	0.000960938
A11	9	spx14	0.231553	-0.00142799
A11	10	spx14	0.236261	0.00297817
A11	11	spx14	0.233251	-0.000332794
A11	12	spx14	0.235189	0.00130318
A11	13	spx14	0.236198	0.00201055
A11	14	spx14	0.232284	-0.00220506
A11	15	spx14	0.232865	-0.00192546
A11	16	spx14	0.234874	-0.000218542
A11	17	spx14	0.230953	-0.00444098
A11	18	spx14	0.233719	-0.00197597
A11	19	spx14	0.234654	-0.00134247
A11	20	spx14	0.232244	-0.00405474
A11	21	spx14	0.230424	-0.00617638
A11	22	spx14	0.235082	-0.00181985
A11	23	spx14	0.23435	-0.00285309
A11	24	spx14	0.236306	-0.00119854
A11	25	spx14	0.239376	0.00156961
A11	26	spx14	0.241276	0.00316786
A11	27	spx14	0.250349	0.0119394
A11	28	spx14	0.259468	0.0207567
A11	29	spx14	0.28793	0.048917
A11	30	spx14	0.333153	0.0938388
A11	31	spx14	0.422509	0.182893
A11	32	spx14	0.580601	0.340684
A11	33	spx14	0.830996	0.590777
A11	34	spx14	1.14411	0.903592
A11	35	spx14	1.40508	1.16426
A11	36	spx14	1.58001	1.33889
A11	37	spx14	1.73247	1.49105
A11	38	spx14	1.88582	1.64409
A11	39	spx14	1.99578	1.75375
A11	40	spx14	2.09358	1.85125
A12	1	spx14	0.279969	-0.0711398
A12	2	spx14	0.282836	-0.0709057
A12	3	spx14	0.286071	-0.0703032
A12	4	spx14	0.286799	-0.072208
A12	5	spx14	0.326956	-0.0346836
A12	6	spx14	0.39319	0.0289185
A12	7	spx14	0.406821	0.0399167
A12	8	spx14	0.402249	0.0327117
A12	9	spx14	0.399957	0.0277876
A12	10	spx14	0.402701	0.0278993
A12	11	spx14	0.400398	0.0229632
A12	12	spx14	0.399405	0.0193381
A12	13	spx14	0.396912	0.014212
A12	14	spx14	0.398813	0.0134808
A12	15	spx14	0.398082	0.0101177
A12	16	spx14	0.399058	0.00846077
A12	17	spx14	0.399678	0.00644811
A12	18	spx14	0.398715	0.00285269
A12	19	spx14	0.396766	-0.00172875
A12	20	spx14	0.394206	-0.00692105
A12	21	spx14	0.398511	-0.00524856
A12	22	spx14	0.400503	-0.00588921
A12	23	spx14	0.400533	-0.00849192
A12	24	spx14	0.402621	-0.00903616
A12	25	spx14	0.400713	-0.0135768
A12	26	spx14	0.401519	-0.0154034
A12	27	spx14	0.407939	-0.0116165
A12	28	spx14	0.417881	-0.00430689
A12	29	spx14	0.432116	0.00729567
A12	30	spx14	0.471112	0.0436595
A12	31	spx14	0.534365	0.104279
A12	32	spx14	0.657934	0.225216
A12	33	spx14	0.852111	0.41676
A12	34	spx14	1.13958	0.701594
A12	35	spx14	1.42214	0.98152
A12	36	spx14	1.60692	1.16367
A12	37	spx14	1.76499	1.31911
A12	38	spx14	1.93293	1.48442
A12	39	spx14	2.05219	1.60105
A12	40	spx14	2.16537	1.71159
B1	1	spx11	0.277151	0.00167906
B1	2	spx11	0.274068	-0.00185918
B1	3	spx11	0.274313	-0.00206835
B1	4	spx11	0.280711	0.0038752
B1	5	spx11	0.277698	0.000407655
B1	6	spx11	0.275355	-0.00238928
B1	7	spx11	0.27925	0.00105105
B1	8	spx11	0.282078	0.0034247
B1	9	spx11	0.276649	-0.00245913
B1	10	spx11	0.278777	-0.000785629
B1	11	spx11	0.285497	0.00548032
B1	12	spx11	0.278877	-0.00159507
B1	13	spx11	0.281838	0.00091162
B1	14	spx11	0.277747	-0.00363346
B1	15	spx11	0.281114	-0.000720718
B1	16	spx11	0.28056	-0.00172922
B1	17	spx11	0.280014	-0.00273006
B1	18	spx11	0.281399	-0.0017992
B1	19	spx11	0.283177	-0.000475932
B1	20	spx11	0.279893	-0.00421441
B1	21	spx11	0.285744	0.00118217
B1	22	spx11	0.293284	0.00826772
B1	23	spx11	0.300116	0.0146449
B1	24	spx11	0.3187	0.0327744
B1	25	spx11	0.351067	0.0646871
B1	26	spx11	0.402317	0.115483
B1	27	spx11	0.479171	0.191883
B1	28	spx11	0.590614	0.302871
B1	29	spx11	0.710266	0.422068
B1	30	spx11	0.802206	0.513554
B1	31	spx11	0.924825	0.635719
B1	32	spx11	1.01654	0.726982
B1	33	spx11	1.14211	0.852098
B1	34	spx11	1.28753	0.997057
B1	35	spx11	1.4392	1.14827
B1	36	spx11	1.54819	1.25682
B1	37	spx11	1.66223	1.3704
B1	38	spx11	1.77948	1.4872
B1	39	spx11	1.87105	1.57831
B1	40	spx11	1.97303	1.67983
B2	1	spx11	0.29632	-0.00684614
B2	2	spx11	0.299556	-0.00417061
B2	3	spx11	0.30224	-0.00204683
B2	4	spx11	0.304695	-0.000152114
B2	5	spx11	0.307975	0.0025672
B2	6	spx11	0.304628	-0.00133994
B2	7	spx11	0.306404	-0.000124088
B2	8	spx11	0.308765	0.00167589
B2	9	spx11	0.307562	-8.65293e-05
B2	10	spx11	0.311026	0.00281685
B2	11	spx11	0.307956	-0.000813877
B2	12	spx11	0.310065	0.000735132
B2	13	spx11	0.311324	0.00143367
B2	14	spx11	0.310819	0.000368214
B2	15	spx11	0.30678	-0.00423123
B2	16	spx11	0.311375	-0.000196503
B2	17	spx11	0.308989	-0.00314344
B2	18	spx11	0.312684	-8.50182e-06
B2	19	spx11	0.310441	-0.00281144
B2	20	spx11	0.314337	0.000524193
B2	21	spx11	0.319207	0.00483334
B2	22	spx11	0.322665	0.00773168
B2	23	spx11	0.333713	0.0182187
B2	24	spx11	0.353645	0.03759
B2	25	spx11	0.38747	0.0708549
B2	26	spx11	0.445842	0.128667
B2	27	spx11	0.525348	0.207612
B2	28	spx11	0.647671	0.329375
B2	29	spx11	0.776868	0.458011
B2	30	spx11	0.879624	0.560208
B2	31	spx11	0.996092	0.676115
B2	32	spx11	1.10876	0.788221
B2	33	spx11	1.23649	0.915395
B2	34	spx11	1.39686	1.0752
B2	35	spx11	1.54709	1.22487
B2	36	spx11	1.67501	1.35224
B2	37	spx11	1.78638	1.46304
B2	38	spx11	1.91817	1.59427
B2	39	spx11	2.00655	1.68209
B2	40	spx11	2.10974	1.78472
B3	1	spx11	0.251712	-0.000717849
B3	2	spx11	0.254124	0.00147456
B3	3	spx11	0.253139	0.000269656
B3	4	spx11	0.253125	3.57108e-05
B3	5	spx11	0.254021	0.000712048
B3	6	spx11	0.250959	-0.00256942
B3	7	spx11	0.252951	-0.00079812
B3	8	spx11	0.255191	0.00122236
B3	9	spx11	0.256116	0.00192722
B3	10	spx11	0.255752	0.0013442
B3	11	spx11	0.254721	9.28315e-05
B3	12	spx11	0.256819	0.00197148
B3	13	spx11	0.252298	-0.00276944
B3	14	spx11	0.254145	-0.00114256
B3	15	spx11	0.256127	0.000619152
B3	16	spx11	0.254133	-0.00159426
B3	17	spx11	0.253905	-0.00204198
B3	18	spx11	0.257457	0.00128971
B3	19	spx11	0.25549	-0.000896524
B3	20	spx11	0.257495	0.000887863
B3	21	spx11	0.258267	0.00144007
B3	22	spx11	0.265698	0.00865131
B3	23	spx11	0.278388	0.0211219
B3	24	spx11	0.298794	0.0413077
B3	25	spx11	0.330319	0.0726127
B3	26	spx11	0.388267	0.130341
B3	27	spx11	0.471579	0.213434
B3	28	spx11	0.594236	0.335871
B3	29	spx11	0.728631	0.470046
B3	30	spx11	0.840194	0.581389
B3	31	spx11	0.969747	0.710722
B3	32	spx11	1.07517	0.81592
B3	33	spx11	1.2076	0.948138
B3	34	spx11	1.3709	1.11122
B3	35	spx11	1.52586	1.26596
B3	36	spx11	1.6506	1.39048
B3	37	spx11	1.76664	1.5063
B3	38	spx11	1.89937	1.63881
B3	39	spx11	1.99025	1.72947
B3	40	spx11	2.09726	1.83626
B4	1	spx12	0.242131	-0.00165697
B4	2	spx12	0.24665	0.00259816
B4	3	spx12	0.245558	0.00124327
B4	4	spx12	0.244634	5.59218e-05
B4	5	spx12	0.24461	-0.000230638
B4	6	spx12	0.246621	0.00151712
B4	7	spx12	0.247647	0.00227958
B4	8	spx12	0.244063	-0.00156785
B4	9	spx12	0.247444	0.00155047
B4	10	spx12	0.244737	-0.00141983
B4	11	spx12	0.246202	-0.000218481
B4	12	spx12	0.247861	0.0011772
B4	13	spx12	0.244866	-0.00208091
B4	14	spx12	0.243968	-0.00324129
B4	15	spx12	0.245526	-0.00194665
B4	16	spx12	0.246539	-0.00119754
B4	17	spx12	0.246764	-0.00123488
B4	18	spx12	0.246532	-0.0017305
B4	19	spx12	0.249579	0.00105371
B4	20	spx12	0.248491	-0.000298175
B4	21	spx12	0.255342	0.00628947
B4	22	spx12	0.26358	0.0142643
B4	23	spx12	0.282371	0.0327924
B4	24	spx12	0.312866	0.0630243
B4	25	spx12	0.370953	0.120848
B4	26	spx12	0.474598	0.22423
B4	27	spx12	0.642085	0.391454
B4	28	spx12	0.882117	0.631222
B4	29	spx12	1.13958	0.888426
B4	30	spx12	1.3255	1.07408
B4	31	spx12	1.51078	1.2591
B4	32	spx12	1.66596	1.41401
B4	33	spx12	1.8143	1.56209
B4	34	spx12	1.95185	1.69938
B4	35	spx12	2.06838	1.81565
B4	36	spx12	2.16068	1.90768
B4	37	spx12	2.21589	1.96262
B4	38	spx12	2.29259	2.03906
B4	39	spx12	2.34322	2.08943
B4	40	spx12	2.38924	2.13519
B5	1	spx12	0.224485	-0.00217024
B5	2	spx12	0.22765	0.00079938
B5	3	spx12	0.229485	0.00243939
B5	4	spx12	0.227337	9.70592e-05
B5	5	spx12	0.228596	0.0011604
B5	6	spx12	0.227242	-0.000387764
B5	7	spx12	0.227793	-3.26471e-05
B5	8	spx12	0.227681	-0.000339529
B5	9	spx12	0.226025	-0.00218977
B5	10	spx12	0.229722	0.00131145
B5	11	spx12	0.228223	-0.00038187
B5	12	spx12	0.228063	-0.000737672
B5	13	spx12	0.228038	-0.000957397
B5	14	spx12	0.228527	-0.000663687
B5	15	spx12	0.228279	-0.0011059
B5	16	spx12	0.22745	-0.00213008
B5	17	spx12	0.230088	0.000312854
B5	18	spx12	0.229078	-0.000892091
B5	19	spx12	0.229584	-0.000581468
B5	20	spx12	0.23141	0.00104955
B5	21	spx12	0.234584	0.00402917
B5	22	spx12	0.243012	0.0122621
B5	23	spx12	0.255187	0.0242413
B5	24	spx12	0.280827	0.0496863
B5	25	spx12	0.331987	0.100651
B5	26	spx12	0.420232	0.188701
B5	27	spx12	0.564637	0.332911
B5	28	spx12	0.776794	0.544874
B5	29	spx12	1.01024	0.778126
B5	30	spx12	1.18822	0.955914
B5	31	spx12	1.3647	1.13219
B5	32	spx12	1.50136	1.26865
B5	33	spx12	1.63275	1.39985
B5	34	spx12	1.76258	1.52949
B5	35	spx12	1.86553	1.63224
B5	36	spx12	1.94661	1.71313
B5	37	spx12	2.00318	1.7695
B5	38	spx12	2.08286	1.84899
B5	39	spx12	2.12254	1.88847
B5	40	spx12	2.16798	1.93372
B6	1	spx12	0.209842	8.69904e-06
B6	2	spx12	0.210353	0.000227935
B6	3	spx12	0.209665	-0.000750958
B6	4	spx12	0.211991	0.00128278
B6	5	spx12	0.211916	0.000916934
B6	6	spx12	0.210716	-0.000575199
B6	7	spx12	0.213796	0.00221343
B6	8	spx12	0.211804	-6.92699e-05
B6	9	spx12	0.210898	-0.00126676
B6	10	spx12	0.21343	0.000973593
B6	11	spx12	0.212539	-0.000208999
B6	12	spx12	0.213536	0.000496894
B6	13	spx12	0.213009	-0.000321617
B6	14	spx12	0.213437	-0.000185485
B6	15	spx12	0.212574	-0.00133969
B6	16	spx12	0.211138	-0.00306736
B6	17	spx12	0.212844	-0.00165276
B6	18	spx12	0.211377	-0.00341098
B6	19	spx12	0.215968	0.000888699
B6	20	spx12	0.215373	1.98557e-06
B6	21	spx12	0.221737	0.00607477
B6	22	spx12	0.231136	0.0151818
B6	23	spx12	0.25052	0.0342752
B6	24	spx12	0.285569	0.0690321
B6	25	spx12	0.348197	0.131369
B6	26	spx12	0.457818	0.240698
B6	27	spx12	0.641584	0.424173
B6	28	spx12	0.892994	0.675292
B6	29	spx12	1.16014	0.942151
B6	30	spx12	1.35356	1.13528
B6	31	spx12	1.55262	1.33404
B6	32	spx12	1.70258	1.48372
B6	33	spx12	1.84922	1.63006
B6	34	spx12	1.99608	1.77663
B6	35	spx12	2.11402	1.89428
B6	36	spx12	2.19604	1.97601
B6	37	spx12	2.26335	2.04302
B6	38	spx12	2.33855	2.11793
B6	39	spx12	2.38244	2.16154
B6	40	spx12	2.4327	2.2115
B7	1	spx13	0.227553	-0.0025791
B7	2	spx13	0.230571	0.00020612
B7	3	spx13	0.230012	-0.000584653
B7	4	spx13	0.232943	0.00211387
B7	5	spx13	0.232166	0.00110407
B7	6	spx13	0.230566	-0.000728056
B7	7	spx13	0.232138	0.000611813
B7	8	spx13	0.232299	0.000540468
B7	9	spx13	0.231803	-0.000188361
B7	10	spx13	0.229522	-0.00270183
B7	11	spx13	0.231858	-0.000597528
B7	12	spx13	0.234667	0.00197914
B7	13	spx13	0.231786	-0.00113419
B7	14	spx13	0.228753	-0.00439952
B7	15	spx13	0.235388	0.00200318
B7	16	spx13	0.233158	-0.000459385
B7	17	spx13	0.232634	-0.00121581
B7	18	spx13	0.234175	9.33031e-05
B7	19	spx13	0.237878	0.00356349
B7	20	spx13	0.246483	0.0119369
B7	21	spx13	0.260893	0.0261137
B7	22	spx13	0.283507	0.0484962
B7	23	spx13	0.331757	0.0965133
B7	24	spx13	0.425268	0.189792
B7	25	spx13	0.591026	0.355318
B7	26	spx13	0.86321	0.627269
B7	27	spx13	1.23248	0.99631
B7	28	spx13	1.6307	1.39429
B7	29	spx13	1.93446	1.69783
B7	30	spx13	2.11302	1.87615
B7	31	spx13	2.25778	2.02067
B7	32	spx13	2.36588	2.12855
B7	33	spx13	2.43955	2.20199
B7	34	spx13	2.5112	2.2734
B7	35	spx13	2.55943	2.3214
B7	36	spx13	2.59759	2.35932
B7	37	spx13	2.62534	2.38685
B7	38	spx13	2.6527	2.41397
B7	39	spx13	2.66454	2.42558
B7	40	spx13	2.68082	2.44163
B8	1	spx13	0.262104	-0.00271968
B8	2	spx13	0.26578	0.000704034
B8	3	spx13	0.264402	-0.000926582
B8	4	spx13	0.265913	0.000332347
B8	5	spx13	0.266812	0.000978062
B8	6	spx13	0.266426	0.000340371
B8	7	spx13	0.266753	0.000414835
B8	8	spx13	0.267592	0.00100154
B8	9	spx13	0.266761	-8.2409e-05
B8	10	spx13	0.266546	-0.000550168
B8	11	spx13	0.266518	-0.000830529
B8	12	spx13	0.267762	0.000160953
B8	13	spx13	0.265557	-0.00229629
B8	14	spx13	0.268495	0.000389157
B8	15	spx13	0.268774	0.000416087
B8	16	spx13	0.269861	0.00125012
B8	17	spx13	0.265881	-0.00298188
B8	18	spx13	0.268517	-0.000598418
B8	19	spx13	0.272351	0.0029828
B8	20	spx13	0.27925	0.00962927
B8	21	spx13	0.291406	0.0215332
B8	22	spx13	0.316942	0.046817
B8	23	spx13	0.362414	0.0920357
B8	24	spx13	0.449396	0.178766
B8	25	spx13	0.60913	0.338247
B8	26	spx13	0.871859	0.600724
B8	27	spx13	1.23363	0.962243
B8	28	spx13	1.64492	1.37328
B8	29	spx13	1.96413	1.69224
B8	30	spx13	2.14396	1.87182
B8	31	spx13	2.29812	2.02572
B8	32	spx13	2.39752	2.12487
B8	33	spx13	2.48683	2.21393
B8	34	spx13	2.55123	2.27807
B8	35	spx13	2.60974	2.33633
B8	36	spx13	2.6408	2.36714
B8	37	spx13	2.66631	2.39239
B8	38	spx13	2.68717	2.413
B8	39	spx13	2.70307	2.42866
B8	40	spx13	2.71734	2.44267
B9	1	spx13	0.28029	-0.000761006
B9	2	spx13	0.280724	-0.000576159
B9	3	spx13	0.281578	2.84244e-05
B9	4	spx13	0.281393	-0.000405603
B9	5	spx13	0.283566	0.00151749
B9	6	spx13	0.283124	0.000827077
B9	7	spx13	0.28233	-0.000216737
B9	8	spx13	0.283122	0.000326126
B9	9	spx13	0.284424	0.00137953
B9	10	spx13	0.281304	-0.00198982
B9	11	spx13	0.28486	0.00131766
B9	12	spx13	0.282388	-0.00140382
B9	13	spx13	0.283355	-0.000685687
B9	14	spx13	0.283192	-0.00109826
B9	15	spx13	0.282507	-0.00203255
B9	16	spx13	0.282642	-0.00214697
B9	17	spx13	0.285028	-1.00451e-05
B9	18	spx13	0.285528	0.000240874
B9	19	spx13	0.289888	0.0043523
B9	20	spx13	0.297309	0.0115236
B9	21	spx13	0.31007	0.0240359
B9	22	spx13	0.340028	0.0537451
B9	23	spx13	0.389838	0.103306
B9	24	spx13	0.489988	0.203206
B9	25	spx13	0.66746	0.38043
B9	26	spx13	0.950987	0.663707
B9	27	spx13	1.32345	1.03592
B9	28	spx13	1.703	1.41522
B9	29	spx13	1.98502	1.697
B9	30	spx13	2.13329	1.84501
B9	31	spx13	2.27353	1.98501
B9	32	spx13	2.374	2.08523
B9	33	spx13	2.44494	2.15591
B9	34	spx13	2.49821	2.20894
B9	35	spx13	2.5603	2.27078
B9	36	spx13	2.58747	2.2977
B9	37	spx13	2.61108	2.32106
B9	38	spx13	2.63202	2.34175
B9	39	spx13	2.65228	2.36176
B9	40	spx13	2.66579	2.37502
B10	1	spx14	0.297878	-0.0143327
B10	2	spx14	0.303535	-0.00887067
B10	3	spx14	0.310234	-0.00236742
B10	4	spx14	0.311849	-0.000948039
B10	5	spx14	0.311817	-0.00117577
B10	6	spx14	0.313725	0.000536396
B10	7	spx14	0.31426	0.000875388
B10	8	spx14	0.315866	0.00228652
B10	9	spx14	0.315547	0.00177155
B10	10	spx14	0.314585	0.000614231
B10	11	spx14	0.313575	-0.000592116
B10	12	spx14	0.316724	0.00236203
B10	13	spx14	0.313378	-0.00117981
B10	14	spx14	0.316138	0.00138449
B10	15	spx14	0.315673	0.000724274
B10	16	spx14	0.314268	-0.000876955
B10	17	spx14	0.318181	0.00284096
B10	18	spx14	0.314851	-0.000685494
B10	19	spx14	0.314458	-0.00127395
B10	20	spx14	0.315214	-0.000712931
B10	21	spx14	0.31357	-0.00255305
B10	22	spx14	0.313017	-0.00330161
B10	23	spx14	0.314352	-0.00216243
B10	24	spx14	0.315358	-0.00135238
B10	25	spx14	0.316378	-0.000527965
B10	26	spx14	0.319094	0.00199271
B10	27	spx14	0.321618	0.00432136
B10	28	spx14	0.329598	0.0121052
B10	29	spx14	0.339893	0.0222049
B10	30	spx14	0.362922	0.0450387
B10	31	spx14	0.406529	0.0884494
B10	32	spx14	0.496233	0.177958
B10	33	spx14	0.644951	0.32648
B10	34	spx14	0.887997	0.569331
B10	35	spx14	1.20607	0.887205
B10	36	spx14	1.46867	1.14961
B10	37	spx14	1.63903	1.31978
B10	38	spx14	1.8204	1.50095
B10	39	spx14	1.95072	1.63107
B10	40	spx14	2.07731	1.75747
B11	1	spx14	0.313712	-0.0146801
B11	2	spx14	0.320988	-0.00793972
B11	3	spx14	0.322595	-0.00686671
B11	4	spx14	0.328488	-0.00150923
B11	5	spx14	0.328597	-0.00193471
B11	6	spx14	0.332872	0.00180563
B11	7	spx14	0.33312	0.0015193
B11	8	spx14	0.33658	0.00444396
B11	9	spx14	0.334879	0.00220849
B11	10	spx14	0.335066	0.00186038
B11	11	spx14	0.335401	0.00166053
B11	12	spx14	0.335507	0.0012323
B11	13	spx14	0.33758	0.00277005
B11	14	spx14	0.335981	0.00063642
B11	15	spx14	0.337582	0.00170302
B11	16	spx14	0.334756	-0.00165808
B11	17	spx14	0.337362	0.000413606
B11	18	spx14	0.33625	-0.0012335
B11	19	spx14	0.335374	-0.00264449
B11	20	spx14	0.337235	-0.00131819
B11	21	spx14	0.338104	-0.000983711
B11	22	spx14	0.340632	0.00100924
B11	23	spx14	0.338298	-0.00185887
B11	24	spx14	0.337247	-0.00344539
B11	25	spx14	0.339841	-0.00138545
B11	26	spx14	0.338442	-0.00331953
B11	27	spx14	0.341614	-0.000682194
B11	28	spx14	0.343706	0.000874775
B11	29	spx14	0.350068	0.00670236
B11	30	spx14	0.357275	0.0133738
B11	31	spx14	0.382115	0.0376791
B11	32	spx14	0.424282	0.0793114
B11	33	spx14	0.501905	0.1564
B11	34	spx14	0.647082	0.301042
B11	35	spx14	0.872945	0.526371
B11	36	spx14	1.16916	0.822046
B11	37	spx14	1.41873	1.07109
B11	38	spx14	1.62187	1.27369
B11	39	spx14	1.77629	1.42758
B11	40	spx14	1.93022	1.58097
B12	1	spx14	0.294368	-0.0125114
B12	2	spx14	0.300467	-0.00719305
B12	3	spx14	0.303017	-0.00542372
B12	4	spx14	0.30585	-0.00337151
B12	5	spx14	0.310717	0.000715427
B12	6	spx14	0.311918	0.00113539
B12	7	spx14	0.312644	0.00108088
B12	8	spx14	0.313309	0.000965538
B12	9	spx14	0.312589	-0.000535045
B12	10	spx14	0.312518	-0.00138665
B12	11	spx14	0.315028	0.000342859
B12	12	spx14	0.317231	0.00176573
B12	13	spx14	0.319453	0.00320652
B12	14	spx14	0.32121	0.00418272
B12	15	spx14	0.320986	0.00317852
B12	16	spx14	0.319067	0.000479381
B12	17	spx14	0.323023	0.00365425
B12	18	spx14	0.318499	-0.00165028
B12	19	spx14	0.320996	6.66584e-05
B12	20	spx14	0.319908	-0.00180252
B12	21	spx14	0.321847	-0.000643872
B12	22	spx14	0.322778	-0.000493078
B12	23	spx14	0.322058	-0.00199384
B12	24	spx14	0.324466	-0.000366134
B12	25	spx14	0.322277	-0.00333621
B12	26	spx14	0.325581	-0.000812317
B12	27	spx14	0.328215	0.00104129
B12	28	spx14	0.333767	0.00581246
B12	29	spx14	0.344499	0.0157643
B12	30	spx14	0.36594	0.0364242
B12	31	spx14	0.402797	0.0725003
B12	32	spx14	0.478895	0.147818
B12	33	spx14	0.613661	0.281803
B12	34	spx14	0.833616	0.500978
B12	35	spx14	1.12977	0.796354
B12	36	spx14	1.39524	1.06104
B12	37	spx14	1.56846	1.23348
B12	38	spx14	1.74586	1.4101
B12	39	spx14	1.88008	1.54353
B12	40	spx14	2.00701	1.66969
C1	1	spx11	0.274063	-0.00389543
C1	2	spx11	0.276681	-0.00209874
C1	3	spx11	0.278129	-0.00147233
C1	4	spx11	0.279846	-0.000576621
C1	5	spx11	0.281943	0.000699214
C1	6	spx11	0.282967	0.000901928
C1	7	spx11	0.283297	0.000409889
C1	8	spx11	0.281238	-0.00247075
C1	9	spx11	0.284845	0.000315442
C1	10	spx11	0.288569	0.00321741
C1	11	spx11	0.287592	0.00141899
C1	12	spx11	0.288604	0.00160951
C1	13	spx11	0.289171	0.00135556
C1	14	spx11	0.287896	-0.000740524
C1	15	spx11	0.289177	-0.000281303
C1	16	spx11	0.290517	0.000236749
C1	17	spx11	0.287695	-0.00340677
C1	18	spx11	0.28761	-0.00431264
C1	19	spx11	0.292131	-0.000613607
C1	20	spx11	0.294331	0.000765226
C1	21	spx11	0.292671	-0.00171645
C1	22	spx11	0.296518	0.00130935
C1	23	spx11	0.299382	0.0033517
C1	24	spx11	0.305561	0.00870926
C1	25	spx11	0.325829	0.0281566
C1	26	spx11	0.348126	0.0496312
C1	27	spx11	0.390003	0.090687
C1	28	spx11	0.4621	0.161963
C1	29	spx11	0.557477	0.256518
C1	30	spx11	0.651775	0.349995
C1	31	spx11	0.767957	0.465355
C1	32	spx11	0.856165	0.552742
C1	33	spx11	0.955944	0.651699
C1	34	spx11	1.08333	0.778267
C1	35	spx11	1.22377	0.917884
C1	36	spx11	1.35019	1.04348
C1	37	spx11	1.46998	1.16245
C1	38	spx11	1.6076	1.29925
C1	39	spx11	1.70842	1.39925
C1	40	spx11	1.83344	1.52345
C2	1	spx11	0.235349	-0.00607748
C2	2	spx11	0.239772	-0.00200398
C2	3	spx11	0.241134	-0.000990835
C2	4	spx11	0.242331	-0.000142825
C2	5	spx11	0.245547	0.00272362
C2	6	spx11	0.244117	0.000943902
C2	7	spx11	0.247713	0.004191
C2	8	spx11	0.242209	-0.00166309
C2	9	spx11	0.243796	-0.000425486
C2	10	spx11	0.243582	-0.000988646
C2	11	spx11	0.24514	0.000220181
C2	12	spx11	0.248839	0.00356948
C2	13	spx11	0.242479	-0.00313967
C2	14	spx11	0.243107	-0.00286148
C2	15	spx11	0.246097	-0.000220537
C2	16	spx11	0.246038	-0.000629067
C2	17	spx11	0.243217	-0.00379948
C2	18	spx11	0.245138	-0.00222719
C2	19	spx11	0.246563	-0.00115202
C2	20	spx11	0.24533	-0.00273387
C2	21	spx11	0.24878	0.000365956
C2	22	spx11	0.250343	0.00158037
C2	23	spx11	0.256492	0.00737969
C2	24	spx11	0.262438	0.012976
C2	25	spx11	0.276151	0.0263395
C2	26	spx11	0.30297	0.0528093
C2	27	spx11	0.344158	0.0936486
C2	28	spx11	0.410286	0.159427
C2	29	spx11	0.504497	0.253288
C2	30	spx11	0.599699	0.348141
C2	31	spx11	0.722075	0.470167
C2	32	spx11	0.815555	0.563298
C2	33	spx11	0.913673	0.661067
C2	34	spx11	1.04559	0.792637
C2	35	spx11	1.18547	0.932167
C2	36	spx11	1.31388	1.06023
C2	37	spx11	1.43765	1.18365
C2	38	spx11	1.57134	1.31698
C2	39	spx11	1.67467	1.41997
C2	40	spx11	1.7973	1.54225
C3	1	spx11	0.278196	-0.00285931
C3	2	spx11	0.285456	0.00417637
C3	3	spx11	0.281818	0.000313968
C3	4	spx11	0.284509	0.00278125
C3	5	spx11	0.283898	0.00194599
C3	6	spx11	0.280728	-0.00144739
C3	7	spx11	0.281346	-0.00105366
C3	8	spx11	0.283209	0.000585208
C3	9	spx11	0.281769	-0.0010793
C3	10	spx11	0.281773	-0.00129909
C3	11	spx11	0.28397	0.000674191
C3	12	spx11	0.284597	0.00107707
C3	13	spx11	0.281398	-0.00234617
C3	14	spx11	0.282551	-0.00141701
C3	15	spx11	0.284449	0.000257497
C3	16	spx11	0.28192	-0.00249551
C3	17	spx11	0.284865	0.000225356
C3	18	spx11	0.285159	0.000294982
C3	19	spx11	0.285236	0.000147617
C3	20	spx11	0.282682	-0.00262965
C3	21	spx11	0.286762	0.00122567
C3	22	spx11	0.289999	0.00423899
C3	23	spx11	0.2946	0.00861562
C3	24	spx11	0.307941	0.0217327
C3	25	spx11	0.323223	0.0367909
C3	26	spx11	0.360297	0.0736409
C3	27	spx11	0.415256	0.128376
C3	28	spx11	0.504313	0.217208
C3	29	spx11	0.622278	0.33495
C3	30	spx11	0.742949	0.455397
C3	31	spx11	0.880489	0.592712
C3	32	spx11	0.980827	0.692827
C3	33	spx11	1.09696	0.808736
C3	34	spx11	1.25214	0.963694
C3	35	spx11	1.4119	1.12323
C3	36	spx11	1.5495	1.26061
C3	37	spx11	1.6802	1.39108
C3	38	spx11	1.83053	1.54118
C3	39	spx11	1.93326	1.64369
C3	40	spx11	2.04955	1.75976
C4	1	spx12	0.25585	-0.00505666
C4	2	spx12	0.258919	-0.00215014
C4	3	spx12	0.26149	0.000258523
C4	4	spx12	0.263735	0.0023405
C4	5	spx12	0.26166	0.000102743
C4	6	spx12	0.263891	0.00217128
C4	7	spx12	0.26038	-0.00150241
C4	8	spx12	0.263983	0.00193726
C4	9	spx12	0.261461	-0.000746929
C4	10	spx12	0.264484	0.00211268
C4	11	spx12	0.259155	-0.0033786
C4	12	spx12	0.262871	0.000174837
C4	13	spx12	0.26431	0.00145108
C4	14	spx12	0.259743	-0.00327866
C4	15	spx12	0.262989	-0.000195209
C4	16	spx12	0.261632	-0.00171479
C4	17	spx12	0.263028	-0.000482208
C4	18	spx12	0.261869	-0.0018039
C4	19	spx12	0.263147	-0.000687848
C4	20	spx12	0.262953	-0.00104472
C4	21	spx12	0.262803	-0.00135742
C4	22	spx12	0.264402	7.82305e-05
C4	23	spx12	0.26232	-0.0021659
C4	24	spx12	0.263775	-0.00087357
C4	25	spx12	0.266941	0.00212965
C4	26	spx12	0.27145	0.00647538
C4	27	spx12	0.277193	0.0120565
C4	28	spx12	0.292916	0.0276168
C4	29	spx12	0.31636	0.0508972
C4	30	spx12	0.362393	0.0967685
C4	31	spx12	0.448392	0.182605
C4	32	spx12	0.589727	0.323777
C4	33	spx12	0.798327	0.532213
C4	34	spx12	1.06522	0.79894
C4	35	spx12	1.31031	1.04387
C4	36	spx12	1.4805	1.21389
C4	37	spx12	1.63774	1.37097
C4	38	spx12	1.81507	1.54814
C4	39	spx12	1.94554	1.67845
C4	40	spx12	2.083	1.81575
C5	1	spx12	0.24802	-0.000986301
C5	2	spx12	0.250032	0.000830058
C5	3	spx12	0.248819	-0.000578106
C5	4	spx12	0.251149	0.00155708
C5	5	spx12	0.249843	5.53194e-05
C5	6	spx12	0.251118	0.00113483
C5	7	spx12	0.251586	0.0014082
C5	8	spx12	0.250262	-0.000111392
C5	9	spx12	0.249731	-0.000837932
C5	10	spx12	0.251602	0.000837953
C5	11	spx12	0.24956	-0.00139979
C5	12	spx12	0.250477	-0.000677414
C5	13	spx12	0.250184	-0.00116579
C5	14	spx12	0.251539	-6.15418e-06
C5	15	spx12	0.25269	0.000948917
C5	16	spx12	0.250976	-0.000960284
C5	17	spx12	0.251713	-0.000418124
C5	18	spx12	0.252603	0.000276654
C5	19	spx12	0.252499	-2.25655e-05
C5	20	spx12	0.249001	-0.00371658
C5	21	spx12	0.251711	-0.00120149
C5	22	spx12	0.254102	0.000994218
C5	23	spx12	0.252144	-0.00115936
C5	24	spx12	0.254116	0.000617896
C5	25	spx12	0.258118	0.00442392
C5	26	spx12	0.256878	0.0029886
C5	27	spx12	0.268435	0.0143504
C5	28	spx12	0.282081	0.0278017
C5	29	spx12	0.314254	0.0597789
C5	30	spx12	0.363635	0.108965
C5	31	spx12	0.457563	0.202697
C5	32	spx12	0.608668	0.353607
C5	33	spx12	0.831753	0.576497
C5	34	spx12	1.10528	0.849824
C5	35	spx12	1.3481	1.09246
C5	36	spx12	1.52446	1.26862
C5	37	spx12	1.67552	1.41948
C5	38	spx12	1.85576	1.59952
C5	39	spx12	1.98109	1.72466
C5	40	spx12	2.11418	1.85756
C6	1	spx12	0.234468	-0.00291228
C6	2	spx12	0.238742	0.00108561
C6	3	spx12	0.236624	-0.0013074
C6	4	spx12	0.238673	0.000465766
C6	5	spx12	0.238995	0.000512919
C6	6	spx12	0.240504	0.00174626
C6	7	spx12	0.239759	0.000726165
C6	8	spx12	0.240125	0.000815934
C6	9	spx12	0.241019	0.00143498
C6	10	spx12	0.239344	-0.00051534
C6	11	spx12	0.239889	-0.00024634
C6	12	spx12	0.241281	0.000869852
C6	13	spx12	0.240361	-0.000324814
C6	14	spx12	0.240437	-0.000525185
C6	15	spx12	0.240593	-0.000644001
C6	16	spx12	0.241461	-5.1556e-05
C6	17	spx12	0.241057	-0.000731372
C6	18	spx12	0.240896	-0.00116818
C6	19	spx12	0.240252	-0.00208673
C6	20	spx12	0.240782	-0.00183284
C6	21	spx12	0.239931	-0.00295887
C6	22	spx12	0.243855	0.000689062
C6	23	spx12	0.241387	-0.00205367
C6	24	spx12	0.241359	-0.00235754
C6	25	spx12	0.247573	0.0035813
C6	26	spx12	0.250229	0.00596159
C6	27	spx12	0.259087	0.0145435
C6	28	spx12	0.273689	0.0288706
C6	29	spx12	0.302866	0.0577724
C6	30	spx12	0.351049	0.105679
C6	31	spx12	0.452309	0.206664
C6	32	spx12	0.60538	0.35946
C6	33	spx12	0.828353	0.582157
C6	34	spx12	1.10566	0.859187
C6	35	spx12	1.3599	1.11315
C6	36	spx12	1.53581	1.28878
C6	37	spx12	1.69813	1.45083
C6	38	spx12	1.88048	1.6329
C6	39	spx12	2.01366	1.76581
C6	40	spx12	2.15032	1.90219
C7	1	spx13	0.242404	-0.00397258
C7	2	spx13	0.245724	-0.000899006
C7	3	spx13	0.248551	0.00168179
C7	4	spx13	0.249576	0.00246076
C7	5	spx13	0.246018	-0.00134386
C7	6	spx13	0.248279	0.000670911
C7	7	spx13	0.249073	0.00121905
C7	8	spx13	0.247877	-0.000223529
C7	9	spx13	0.246251	-0.00209556
C7	10	spx13	0.249682	0.00108895
C7	11	spx13	0.248323	-0.000515484
C7	12	spx13	0.248195	-0.000889935
C7	13	spx13	0.248532	-0.000799364
C7	14	spx13	0.249551	-2.66932e-05
C7	15	spx13	0.247244	-0.0025794
C7	16	spx13	0.247489	-0.00258081
C7	17	spx13	0.250046	-0.000269638
C7	18	spx13	0.250764	0.000202163
C7	19	spx13	0.251251	0.000442401
C7	20	spx13	0.248489	-0.00256622
C7	21	spx13	0.250551	-0.000750077
C7	22	spx13	0.253917	0.00236945
C7	23	spx13	0.256298	0.00450509
C7	24	spx13	0.264532	0.012493
C7	25	spx13	0.280995	0.0287092
C7	26	spx13	0.310536	0.0580037
C7	27	spx13	0.367952	0.115173
C7	28	spx13	0.478199	0.225174
C7	29	spx13	0.670851	0.417581
C7	30	spx13	0.970277	0.71676
C7	31	spx13	1.37041	1.11664
C7	32	spx13	1.76764	1.51363
C7	33	spx13	2.03386	1.7796
C7	34	spx13	2.22561	1.97111
C7	35	spx13	2.364	2.10925
C7	36	spx13	2.47306	2.21807
C7	37	spx13	2.54344	2.2882
C7	38	spx13	2.61627	2.36078
C7	39	spx13	2.65385	2.39812
C7	40	spx13	2.69716	2.44118
C8	1	spx13	0.274672	-0.00239044
C8	2	spx13	0.276338	-0.000876641
C8	3	spx13	0.276802	-0.000564411
C8	4	spx13	0.280188	0.00266916
C8	5	spx13	0.278565	0.000894187
C8	6	spx13	0.277339	-0.000484685
C8	7	spx13	0.279202	0.00122635
C8	8	spx13	0.278092	-3.51639e-05
C8	9	spx13	0.279325	0.00104561
C8	10	spx13	0.279232	0.00079988
C8	11	spx13	0.277327	-0.00125685
C8	12	spx13	0.27752	-0.0012162
C8	13	spx13	0.276965	-0.00192333
C8	14	spx13	0.278426	-0.00061484
C8	15	spx13	0.27801	-0.00118318
C8	16	spx13	0.277842	-0.00150282
C8	17	spx13	0.278922	-0.000575169
C8	18	spx13	0.278618	-0.00103136
C8	19	spx13	0.278514	-0.00128743
C8	20	spx13	0.27811	-0.00184382
C8	21	spx13	0.280125	1.83696e-05
C8	22	spx13	0.281311	0.00105205
C8	23	spx13	0.286224	0.00581365
C8	24	spx13	0.291249	0.0106857
C8	25	spx13	0.302777	0.0220621
C8	26	spx13	0.329411	0.0485439
C8	27	spx13	0.378653	0.0976337
C8	28	spx13	0.470606	0.189434
C8	29	spx13	0.634968	0.353644
C8	30	spx13	0.898366	0.61689
C8	31	spx13	1.28033	0.998698
C8	32	spx13	1.68434	1.40256
C8	33	spx13	1.9949	1.71297
C8	34	spx13	2.1974	1.91532
C8	35	spx13	2.34779	2.06555
C8	36	spx13	2.4562	2.17381
C8	37	spx13	2.53111	2.24857
C8	38	spx13	2.60529	2.32259
C8	39	spx13	2.65213	2.36928
C8	40	spx13	2.68869	2.40569
C9	1	spx13	0.328524	-0.00407781
C9	2	spx13	0.334849	0.00230284
C9	3	spx13	0.335098	0.00260739
C9	4	spx13	0.333592	0.0011579
C9	5	spx13	0.334605	0.00222744
C9	6	spx13	0.333769	0.00144675
C9	7	spx13	0.331244	-0.00102196
C9	8	spx13	0.332904	0.000694661
C9	9	spx13	0.331597	-0.000556766
C9	10	spx13	0.330642	-0.0014562
C9	11	spx13	0.328438	-0.00360324
C9	12	spx13	0.330265	-0.0017209
C9	13	spx13	0.330597	-0.0013326
C9	14	spx13	0.329914	-0.00195955
C9	15	spx13	0.331731	-8.63188e-05
C9	16	spx13	0.332795	0.00103363
C9	17	spx13	0.330705	-0.000999814
C9	18	spx13	0.330676	-0.000973615
C9	19	spx13	0.330158	-0.00143558
C9	20	spx13	0.330935	-0.000602391
C9	21	spx13	0.329298	-0.00218313
C9	22	spx13	0.334614	0.00318871
C9	23	spx13	0.336944	0.00557558
C9	24	spx13	0.342275	0.010962
C9	25	spx13	0.358716	0.0274594
C9	26	spx13	0.384303	0.0531019
C9	27	spx13	0.439156	0.108011
C9	28	spx13	0.538785	0.207696
C9	29	spx13	0.713894	0.382862
C9	30	spx13	0.987808	0.656832
C9	31	spx13	1.36272	1.0318
C9	32	spx13	1.72797	1.39711
C9	33	spx13	1.98907	1.65826
C9	34	spx13	2.16403	1.83328
C9	35	spx13	2.29536	1.96466
C9	36	spx13	2.39787	2.06723
C9	37	spx13	2.45888	2.12829
C9	38	spx13	2.52714	2.19662
C9	39	spx13	2.56004	2.22957
C9	40	spx13	2.60131	2.27089
C10	1	spx14	0.279411	-0.0026631
C10	2	spx14	0.281657	-0.000545568
C10	3	spx14	0.281988	-0.000342152
C10	4	spx14	0.283664	0.00120481
C10	5	spx14	0.283983	0.00139598
C10	6	spx14	0.283089	0.00037327
C10	7	spx14	0.283006	0.000161778
C10	8	spx14	0.284418	0.00144502
C10	9	spx14	0.285026	0.00192521
C10	10	spx14	0.284662	0.00143251
C10	11	spx14	0.283217	-0.000140713
C10	12	spx14	0.281734	-0.00175291
C10	13	spx14	0.282677	-0.000937983
C10	14	spx14	0.281934	-0.00180924
C10	15	spx14	0.283997	0.000124918
C10	16	spx14	0.2849	0.000899317
C10	17	spx14	0.283322	-0.00080691
C10	18	spx14	0.281069	-0.00318804
C10	19	spx14	0.281205	-0.0031801
C10	20	spx14	0.284613	9.94847e-05
C10	21	spx14	0.281114	-0.00352884
C10	22	spx14	0.285518	0.000747627
C10	23	spx14	0.282368	-0.00253085
C10	24	spx14	0.285543	0.000514991
C10	25	spx14	0.28415	-0.00100646
C10	26	spx14	0.286746	0.00146181
C10	27	spx14	0.286979	0.00156655
C10	28	spx14	0.291412	0.00587092
C10	29	spx14	0.299275	0.0136054
C10	30	spx14	0.316858	0.0310601
C10	31	spx14	0.349398	0.0634717
C10	32	spx14	0.41276	0.126704
C10	33	spx14	0.529488	0.243305
C10	34	spx14	0.727572	0.44126
C10	35	spx14	1.01664	0.730195
C10	36	spx14	1.31784	1.03128
C10	37	spx14	1.52278	1.23608
C10	38	spx14	1.71246	1.42564
C10	39	spx14	1.84894	1.56199
C10	40	spx14	1.98642	1.69934
C11	1	spx14	0.251609	-0.00722346
C11	2	spx14	0.257029	-0.00201283
C11	3	spx14	0.254172	-0.00507946
C11	4	spx14	0.259559	9.82124e-05
C11	5	spx14	0.260092	0.000422607
C11	6	spx14	0.25835	-0.00152861
C11	7	spx14	0.260834	0.000745747
C11	8	spx14	0.264525	0.00422725
C11	9	spx14	0.26151	0.00100332
C11	10	spx14	0.259866	-0.0008497
C11	11	spx14	0.265013	0.00408738
C11	12	spx14	0.263996	0.00286161
C11	13	spx14	0.261722	0.000378742
C11	14	spx14	0.26227	0.000717114
C11	15	spx14	0.261892	0.000129558
C11	16	spx14	0.259201	-0.00277072
C11	17	spx14	0.261275	-0.000905245
C11	18	spx14	0.262992	0.000601975
C11	19	spx14	0.261961	-0.00063861
C11	20	spx14	0.26256	-0.000248382
C11	21	spx14	0.25998	-0.00303729
C11	22	spx14	0.262706	-0.000520573
C11	23	spx14	0.262562	-0.00087427
C11	24	spx14	0.259886	-0.00375935
C11	25	spx14	0.263875	2.01208e-05
C11	26	spx14	0.263905	-0.000158458
C11	27	spx14	0.265133	0.000859407
C11	28	spx14	0.2687	0.00421762
C11	29	spx14	0.276932	0.0122401
C11	30	spx14	0.290854	0.0259531
C11	31	spx14	0.316762	0.0516521
C11	32	spx14	0.368785	0.103466
C11	33	spx14	0.464399	0.198871
C11	34	spx14	0.633874	0.368136
C11	35	spx14	0.898798	0.632851
C11	36	spx14	1.20047	0.934311
C11	37	spx14	1.43096	1.1646
C11	38	spx14	1.62378	1.3572
C11	39	spx14	1.77414	1.50736
C11	40	spx14	1.92018	1.65319
C12	1	spx14	0.281885	-0.0127752
C12	2	spx14	0.287308	-0.00790582
C12	3	spx14	0.289997	-0.00577095
C12	4	spx14	0.291987	-0.00433409
C12	5	spx14	0.295399	-0.00147601
C12	6	spx14	0.297506	7.75274e-05
C12	7	spx14	0.297679	-0.000302746
C12	8	spx14	0.301879	0.00334369
C12	9	spx14	0.300418	0.0013284
C12	10	spx14	0.303028	0.00338513
C12	11	spx14	0.301274	0.0010776
C12	12	spx14	0.300839	8.9116e-05
C12	13	spx14	0.304505	0.00320126
C12	14	spx14	0.303536	0.00167818
C12	15	spx14	0.304661	0.00225015
C12	16	spx14	0.304236	0.00127139
C12	17	spx14	0.3063	0.00278184
C12	18	spx14	0.303278	-0.000793633
C12	19	spx14	0.304789	0.000163323
C12	20	spx14	0.304706	-0.000473012
C12	21	spx14	0.306532	0.000799105
C12	22	spx14	0.307324	0.00103756
C12	23	spx14	0.305702	-0.00113753
C12	24	spx14	0.303627	-0.00376684
C12	25	spx14	0.30456	-0.00338742
C12	26	spx14	0.307343	-0.00115775
C12	27	spx14	0.308198	-0.000856568
C12	28	spx14	0.31058	0.000972286
C12	29	spx14	0.319732	0.00957032
C12	30	spx14	0.330325	0.01961
C12	31	spx14	0.355889	0.0446208
C12	32	spx14	0.405985	0.0941632
C12	33	spx14	0.499484	0.187108
C12	34	spx14	0.662518	0.349589
C12	35	spx14	0.918786	0.605303
C12	36	spx14	1.21337	0.899338
C12	37	spx14	1.4441	1.12951
C12	38	spx14	1.63966	1.32452
C12	39	spx14	1.78606	1.47036
C12	40	spx14	1.94123	1.62498
D1	1	spx11	0.303843	-0.0042546
D1	2	spx11	0.307803	-0.000953308
D1	3	spx11	0.309613	0.000197326
D1	4	spx11	0.310081	5.54438e-06
D1	5	spx11	0.312198	0.00146338
D1	6	spx11	0.312278	0.000884675
D1	7	spx11	0.311743	-0.000310193
D1	8	spx11	0.312317	-0.000394806
D1	9	spx11	0.311609	-0.00176259
D1	10	spx11	0.316298	0.00226722
D1	11	spx11	0.316553	0.00186351
D1	12	spx11	0.313073	-0.00227571
D1	13	spx11	0.313877	-0.0021309
D1	14	spx11	0.315607	-0.00106049
D1	15	spx11	0.315703	-0.001624
D1	16	spx11	0.316829	-0.00115736
D1	17	spx11	0.319575	0.000929932
D1	18	spx11	0.318601	-0.000703746
D1	19	spx11	0.321751	0.00178746
D1	20	spx11	0.322644	0.00202074
D1	21	spx11	0.327724	0.00644159
D1	22	spx11	0.341483	0.0195413
D1	23	spx11	0.358183	0.0355821
D1	24	spx11	0.394723	0.0714628
D1	25	spx11	0.449855	0.125936
D1	26	spx11	0.541477	0.216899
D1	27	spx11	0.663578	0.33834
D1	28	spx11	0.794387	0.468491
D1	29	spx11	0.918916	0.59236
D1	30	spx11	1.02083	0.693617
D1	31	spx11	1.15211	0.824233
D1	32	spx11	1.28349	0.954953
D1	33	spx11	1.42191	1.09271
D1	34	spx11	1.59002	1.26016
D1	35	spx11	1.73249	1.40198
D1	36	spx11	1.84759	1.51642
D1	37	spx11	1.95749	1.62566
D1	38	spx11	2.07605	1.74356
D1	39	spx11	2.16305	1.8299
D1	40	spx11	2.24703	1.91322
D2	1	spx11	0.265013	-0.00016077
D2	2	spx11	0.267028	0.00162291
D2	3	spx11	0.265737	0.000101045
D2	4	spx11	0.266258	0.000390769
D2	5	spx11	0.267113	0.00101458
D2	6	spx11	0.266061	-0.000269113
D2	7	spx11	0.268937	0.00237562
D2	8	spx11	0.265633	-0.0011596
D2	9	spx11	0.269071	0.00204696
D2	10	spx11	0.265554	-0.00170129
D2	11	spx11	0.268507	0.00102066
D2	12	spx11	0.265185	-0.00253248
D2	13	spx11	0.264463	-0.00348613
D2	14	spx11	0.26657	-0.00160997
D2	15	spx11	0.268616	0.000204288
D2	16	spx11	0.269637	0.000994244
D2	17	spx11	0.266987	-0.001887
D2	18	spx11	0.27032	0.00121469
D2	19	spx11	0.270813	0.00147724
D2	20	spx11	0.271373	0.0018055
D2	21	spx11	0.276777	0.00697782
D2	22	spx11	0.289636	0.0196062
D2	23	spx11	0.310234	0.0399727
D2	24	spx11	0.339598	0.0691054
D2	25	spx11	0.398154	0.12743
D2	26	spx11	0.481943	0.210988
D2	27	spx11	0.598172	0.326986
D2	28	spx11	0.73195	0.460532
D2	29	spx11	0.858531	0.586882
D2	30	spx11	0.956958	0.685078
D2	31	spx11	1.09602	0.823912
D2	32	spx11	1.21976	0.947422
D2	33	spx11	1.3743	1.10173
D2	34	spx11	1.53114	1.25833
D2	35	spx11	1.67987	1.40683
D2	36	spx11	1.80095	1.52769
D2	37	spx11	1.9116	1.6381
D2	38	spx11	2.02964	1.75591
D2	39	spx11	2.12447	1.8505
D2	40	spx11	2.21878	1.94459
D3	1	spx11	0.3128	-0.000328194
D3	2	spx11	0.315889	0.0025231
D3	3	spx11	0.315754	0.00215
D3	4	spx11	0.316146	0.00230421
D3	5	spx11	0.31514	0.00106049
D3	6	spx11	0.314671	0.000353537
D3	7	spx11	0.313762	-0.000792732
D3	8	spx11	0.31626	0.00146764
D3	9	spx11	0.314257	-0.000772847
D3	10	spx11	0.315533	0.000265246
D3	11	spx11	0.313767	-0.00173808
D3	12	spx11	0.31367	-0.00207369
D3	13	spx11	0.312958	-0.00302312
D3	14	spx11	0.313971	-0.00224731
D3	15	spx11	0.315145	-0.00131168
D3	16	spx11	0.315367	-0.00132671
D3	17	spx11	0.314748	-0.00218384
D3	18	spx11	0.313944	-0.00322604
D3	19	spx11	0.319385	0.00197747
D3	20	spx11	0.3208	0.00315527
D3	21	spx11	0.323845	0.00596219
D3	22	spx11	0.33379	0.0156698
D3	23	spx11	0.347757	0.0293993
D3	24	spx11	0.376094	0.0574983
D3	25	spx11	0.425121	0.106287
D3	26	spx11	0.49789	0.178819
D3	27	spx11	0.6086	0.289291
D3	28	spx11	0.740764	0.421218
D3	29	spx11	0.868645	0.548861
D3	30	spx11	0.96997	0.649948
D3	31	spx11	1.10565	0.785387
D3	32	spx11	1.22729	0.906793
D3	33	spx11	1.36941	1.04868
D3	34	spx11	1.5386	1.21763
D3	35	spx11	1.69265	1.37143
D3	36	spx11	1.81341	1.49196
D3	37	spx11	1.92493	1.60324
D3	38	spx11	2.04933	1.7274
D3	39	spx11	2.14131	1.81915
D3	40	spx11	2.24182	1.91942
D4	1	spx12	0.265596	0.001752
D4	2	spx12	0.264789	0.000689973
D4	3	spx12	0.264558	0.000204501
D4	4	spx12	0.267265	0.00265724
D4	5	spx12	0.265396	0.000533592
D4	6	spx12	0.265271	0.000153857
D4	7	spx12	0.266146	0.000774021
D4	8	spx12	0.26526	-0.000365911
D4	9	spx12	0.265436	-0.000445208
D4	10	spx12	0.265965	-0.000170781
D4	11	spx12	0.264466	-0.00192372
D4	12	spx12	0.269177	0.00253251
D4	13	spx12	0.264814	-0.00208475
D4	14	spx12	0.263761	-0.00339197
D4	15	spx12	0.267144	-0.000263849
D4	16	spx12	0.26465	-0.0030123
D4	17	spx12	0.266093	-0.00182354
D4	18	spx12	0.268752	0.0005808
D4	19	spx12	0.267633	-0.000793408
D4	20	spx12	0.270772	0.00209179
D4	21	spx12	0.273682	0.00474713
D4	22	spx12	0.27924	0.0100504
D4	23	spx12	0.290981	0.0215368
D4	24	spx12	0.312595	0.0428959
D4	25	spx12	0.355265	0.0853117
D4	26	spx12	0.42616	0.155952
D4	27	spx12	0.555609	0.285146
D4	28	spx12	0.759925	0.489208
D4	29	spx12	1.01865	0.747683
D4	30	spx12	1.24794	0.976712
D4	31	spx12	1.46413	1.19265
D4	32	spx12	1.61674	1.34501
D4	33	spx12	1.78222	1.51023
D4	34	spx12	1.93628	1.66403
D4	35	spx12	2.06831	1.79581
D4	36	spx12	2.17429	1.90154
D4	37	spx12	2.25624	1.98324
D4	38	spx12	2.335	2.06174
D4	39	spx12	2.39662	2.1231
D4	40	spx12	2.44427	2.1705
D5	1	spx12	0.276016	-0.00274273
D5	2	spx12	0.280693	0.0016588
D5	3	spx12	0.279856	0.000546841
D5	4	spx12	0.281544	0.00195932
D5	5	spx12	0.28045	0.000589773
D5	6	spx12	0.280305	0.000169763
D5	7	spx12	0.280572	0.000161114
D5	8	spx12	0.279657	-0.00102923
D5	9	spx12	0.280372	-0.000590125
D5	10	spx12	0.280262	-0.000975386
D5	11	spx12	0.280937	-0.000575952
D5	12	spx12	0.282152	0.000363739
D5	13	spx12	0.281372	-0.000691568
D5	14	spx12	0.282067	-0.000271719
D5	15	spx12	0.281409	-0.00120495
D5	16	spx12	0.282228	-0.000661486
D5	17	spx12	0.281663	-0.00150156
D5	18	spx12	0.28332	-0.000119931
D5	19	spx12	0.283684	-3.22583e-05
D5	20	spx12	0.28468	0.000688922
D5	21	spx12	0.287441	0.0031747
D5	22	spx12	0.295872	0.0113297
D5	23	spx12	0.307712	0.0228947
D5	24	spx12	0.332198	0.0471053
D5	25	spx12	0.381377	0.0960085
D5	26	spx12	0.463644	0.178001
D5	27	spx12	0.606436	0.320517
D5	28	spx12	0.82991	0.543715
D5	29	spx12	1.1082	0.821732
D5	30	spx12	1.34297	1.05623
D5	31	spx12	1.56	1.27298
D5	32	spx12	1.72542	1.43812
D5	33	spx12	1.8809	1.59332
D5	34	spx12	2.04802	1.76017
D5	35	spx12	2.1809	1.89278
D5	36	spx12	2.28556	1.99716
D5	37	spx12	2.37096	2.08228
D5	38	spx12	2.45489	2.16594
D5	39	spx12	2.50996	2.22073
D5	40	spx12	2.56792	2.27842
D6	1	spx12	0.30758	-0.00219999
D6	2	spx12	0.312825	0.00273057
D6	3	spx12	0.311843	0.00143375
D6	4	spx12	0.311606	0.000882549
D6	5	spx12	0.31184	0.000802705
D6	6	spx12	0.312234	0.000882156
D6	7	spx12	0.31232	0.00065348
D6	8	spx12	0.310135	-0.00184563
D6	9	spx12	0.311781	-0.000513823
D6	10	spx12	0.312538	-7.1768e-05
D6	11	spx12	0.311356	-0.00156794
D6	12	spx12	0.313709	0.00047051
D6	13	spx12	0.313023	-0.000529212
D6	14	spx12	0.312481	-0.00138532
D6	15	spx12	0.312954	-0.00122653
D6	16	spx12	0.31373	-0.000765433
D6	17	spx12	0.313068	-0.00174161
D6	18	spx12	0.314837	-0.000287261
D6	19	spx12	0.313941	-0.00149748
D6	20	spx12	0.318051	0.00229862
D6	21	spx12	0.320075	0.00400823
D6	22	spx12	0.32756	0.011179
D6	23	spx12	0.340015	0.0233197
D6	24	spx12	0.363693	0.046683
D6	25	spx12	0.409344	0.0920193
D6	26	spx12	0.488715	0.171077
D6	27	spx12	0.632229	0.314276
D6	28	spx12	0.850486	0.532219
D6	29	spx12	1.12026	0.801682
D6	30	spx12	1.3461	1.0272
D6	31	spx12	1.56539	1.24618
D6	32	spx12	1.72604	1.40652
D6	33	spx12	1.87694	1.5571
D6	34	spx12	2.03711	1.71696
D6	35	spx12	2.17293	1.85246
D6	36	spx12	2.27545	1.95467
D6	37	spx12	2.35143	2.03033
D6	38	spx12	2.42943	2.10802
D6	39	spx12	2.49267	2.17094
D6	40	spx12	2.54024	2.2182
D7	1	spx13	0.23215	-0.00120395
D7	2	spx13	0.233008	-0.000661676
D7	3	spx13	0.236236	0.00224935
D7	4	spx13	0.234782	0.000480088
D7	5	spx13	0.233657	-0.000961498
D7	6	spx13	0.234541	-0.000393589
D7	7	spx13	0.235077	-0.00017392
D7	8	spx13	0.235195	-0.000372154
D7	9	spx13	0.237175	0.00129205
D7	10	spx13	0.236346	0.000147472
D7	11	spx13	0.235876	-0.000639269
D7	12	spx13	0.237677	0.000846165
D7	13	spx13	0.236008	-0.00113887
D7	14	spx13	0.237203	-0.000260045
D7	15	spx13	0.237522	-0.000257814
D7	16	spx13	0.236625	-0.0014708
D7	17	spx13	0.235702	-0.0027093
D7	18	spx13	0.235472	-0.00325595
D7	19	spx13	0.238888	-0.000155533
D7	20	spx13	0.241669	0.00230956
D7	21	spx13	0.24414	0.00446406
D7	22	spx13	0.253998	0.0140056
D7	23	spx13	0.267586	0.0272782
D7	24	spx13	0.299093	0.0584689
D7	25	spx13	0.360472	0.119532
D7	26	spx13	0.475402	0.234146
D7	27	spx13	0.666426	0.424853
D7	28	spx13	0.981824	0.739935
D7	29	spx13	1.38847	1.14626
D7	30	spx13	1.77785	1.53533
D7	31	spx13	2.069	1.82617
D7	32	spx13	2.2428	1.99965
D7	33	spx13	2.3787	2.13523
D7	34	spx13	2.48283	2.23905
D7	35	spx13	2.57448	2.33038
D7	36	spx13	2.63374	2.38933
D7	37	spx13	2.67709	2.43236
D7	38	spx13	2.71996	2.47491
D7	39	spx13	2.74565	2.50028
D7	40	spx13	2.76716	2.52148
D8	1	spx13	0.238209	-0.00240676
D8	2	spx13	0.241416	0.000550864
D8	3	spx13	0.238329	-0.00278419
D8	4	spx13	0.242518	0.00115648
D8	5	spx13	0.24291	0.00129943
D8	6	spx13	0.244362	0.00250316
D8	7	spx13	0.24364	0.00153252
D8	8	spx13	0.24442	0.00206355
D8	9	spx13	0.243103	0.000497872
D8	10	spx13	0.241351	-0.0015025
D8	11	spx13	0.242244	-0.000857952
D8	12	spx13	0.243515	0.000164836
D8	13	spx13	0.242105	-0.00149393
D8	14	spx13	0.240752	-0.00309565
D8	15	spx13	0.243017	-0.00107902
D8	16	spx13	0.244693	0.000348618
D8	17	spx13	0.240865	-0.00372783
D8	18	spx13	0.243015	-0.00182649
D8	19	spx13	0.24458	-0.000510712
D8	20	spx13	0.246588	0.00124895
D8	21	spx13	0.25165	0.00606286
D8	22	spx13	0.258865	0.0130291
D8	23	spx13	0.271536	0.0254519
D8	24	spx13	0.301223	0.0548894
D8	25	spx13	0.357101	0.110519
D8	26	spx13	0.456476	0.209646
D8	27	spx13	0.634888	0.387809
D8	28	spx13	0.928695	0.681367
D8	29	spx13	1.31763	1.07005
D8	30	spx13	1.70895	1.46113
D8	31	spx13	2.02331	1.77523
D8	32	spx13	2.20108	1.95276
D8	33	spx13	2.32397	2.0754
D8	34	spx13	2.44604	2.19722
D8	35	spx13	2.53535	2.28628
D8	36	spx13	2.59136	2.34204
D8	37	spx13	2.63358	2.38401
D8	38	spx13	2.67969	2.42988
D8	39	spx13	2.70455	2.45448
D8	40	spx13	2.71998	2.46967
D9	1	spx13	0.27114	0.00228639
D9	2	spx13	0.272234	0.00351701
D9	3	spx13	0.271622	0.00304169
D9	4	spx13	0.271481	0.00303778
D9	5	spx13	0.268796	0.000489437
D9	6	spx13	0.270271	0.00210153
D9	7	spx13	0.266877	-0.00115554
D9	8	spx13	0.265885	-0.00201093
D9	9	spx13	0.264099	-0.00366029
D9	10	spx13	0.267544	-7.82929e-05
D9	11	spx13	0.267092	-0.000393964
D9	12	spx13	0.265934	-0.00141431
D9	13	spx13	0.266104	-0.00110741
D9	14	spx13	0.265467	-0.00160795
D9	15	spx13	0.264641	-0.00229758
D9	16	spx13	0.26459	-0.00221086
D9	17	spx13	0.267064	0.000399611
D9	18	spx13	0.266098	-0.000429704
D9	19	spx13	0.266788	0.000397306
D9	20	spx13	0.268131	0.00187702
D9	21	spx13	0.27114	0.00502247
D9	22	spx13	0.279721	0.013741
D9	23	spx13	0.294358	0.0285147
D9	24	spx13	0.320218	0.0545111
D9	25	spx13	0.365661	0.100092
D9	26	spx13	0.452163	0.18673
D9	27	spx13	0.596259	0.330963
D9	28	spx13	0.796487	0.531328
D9	29	spx13	0.967194	0.702172
D9	30	spx13	1.0978	0.832917
D9	31	spx13	1.25575	0.991
D9	32	spx13	1.38961	1.125
D9	33	spx13	1.5154	1.25093
D9	34	spx13	1.62809	1.36375
D9	35	spx13	1.72086	1.45666
D9	36	spx13	1.79358	1.52952
D9	37	spx13	1.85454	1.59061
D9	38	spx13	1.91656	1.65277
D9	39	spx13	1.95817	1.69451
D9	40	spx13	2.006	1.74249
D10	1	spx14	0.354549	-0.00413346
D10	2	spx14	0.360882	0.0021774
D10	3	spx14	0.358658	-6.95152e-05
D10	4	spx14	0.360251	0.00150089
D10	5	spx14	0.358714	-5.84496e-05
D10	6	spx14	0.36157	0.00277489
D10	7	spx14	0.358329	-0.000488995
D10	8	spx14	0.359515	0.000674939
D10	9	spx14	0.358349	-0.000513603
D10	10	spx14	0.358927	4.15891e-05
D10	11	spx14	0.357791	-0.00111694
D10	12	spx14	0.357965	-0.000965899
D10	13	spx14	0.359487	0.000533847
D10	14	spx14	0.360486	0.00151092
D10	15	spx14	0.361154	0.00215629
D10	16	spx14	0.356364	-0.00265624
D10	17	spx14	0.356631	-0.00241186
D10	18	spx14	0.357095	-0.00197045
D10	19	spx14	0.355421	-0.00366685
D10	20	spx14	0.360168	0.00105703
D10	21	spx14	0.357267	-0.00186666
D10	22	spx14	0.360249	0.00109307
D10	23	spx14	0.356886	-0.0022928
D10	24	spx14	0.359326	0.000125127
D10	25	spx14	0.3602	0.000976703
D10	26	spx14	0.359853	0.00060701
D10	27	spx14	0.364295	0.00502595
D10	28	spx14	0.373139	0.0138478
D10	29	spx14	0.390781	0.0314676
D10	30	spx14	0.422001	0.0626648
D10	31	spx14	0.480713	0.121354
D10	32	spx14	0.592712	0.23333
D10	33	spx14	0.774397	0.414993
D10	34	spx14	1.03733	0.677901
D10	35	spx14	1.30852	0.949074
D10	36	spx14	1.49642	1.13695
D10	37	spx14	1.6394	1.27991
D10	38	spx14	1.80617	1.44665
D10	39	spx14	1.92321	1.56367
D10	40	spx14	2.03688	1.67732
D11	1	spx14	0.335707	-0.00427706
D11	2	spx14	0.340156	6.32325e-05
D11	3	spx14	0.339395	-0.000807203
D11	4	spx14	0.341784	0.00147342
D11	5	spx14	0.340488	6.92248e-05
D11	6	spx14	0.34043	-9.76676e-05
D11	7	spx14	0.342513	0.00187665
D11	8	spx14	0.340448	-0.000297223
D11	9	spx14	0.342825	0.00197151
D11	10	spx14	0.341387	0.000424531
D11	11	spx14	0.342144	0.00107318
D11	12	spx14	0.338454	-0.00272605
D11	13	spx14	0.339373	-0.00191504
D11	14	spx14	0.34106	-0.000336856
D11	15	spx14	0.343732	0.00222594
D11	16	spx14	0.340855	-0.000759034
D11	17	spx14	0.342101	0.000378134
D11	18	spx14	0.338832	-0.00299978
D11	19	spx14	0.342964	0.00102365
D11	20	spx14	0.341343	-0.000705894
D11	21	spx14	0.340134	-0.00202339
D11	22	spx14	0.341233	-0.00103372
D11	23	spx14	0.341112	-0.0012626
D11	24	spx14	0.341202	-0.00128197
D11	25	spx14	0.343061	0.000468709
D11	26	spx14	0.341142	-0.00155934
D11	27	spx14	0.344396	0.00158671
D11	28	spx14	0.348152	0.0052341
D11	29	spx14	0.35404	0.0110128
D11	30	spx14	0.36913	0.0259946
D11	31	spx14	0.400579	0.0573347
D11	32	spx14	0.455209	0.111857
D11	33	spx14	0.561857	0.218395
D11	34	spx14	0.746658	0.403087
D11	35	spx14	1.02475	0.681072
D11	36	spx14	1.33	0.98621
D11	37	spx14	1.55266	1.20876
D11	38	spx14	1.74179	1.39779
D11	39	spx14	1.88676	1.54264
D11	40	spx14	2.03811	1.69389
D12	1	spx14	0.830171	-0.0499598
D12	2	spx14	0.847678	-0.0351103
D12	3	spx14	0.856979	-0.0284674
D12	4	spx14	0.869958	-0.0181471
D12	5	spx14	0.880233	-0.0105299
D12	6	spx14	0.890565	-0.00285664
D12	7	spx14	0.89805	0.00197071
D12	8	spx14	0.903547	0.00480959
D12	9	spx14	0.909824	0.00842827
D12	10	spx14	0.910505	0.0064502
D12	11	spx14	0.919648	0.0129355
D12	12	spx14	0.920207	0.0108364
D12	13	spx14	0.923578	0.0115495
D12	14	spx14	0.926064	0.0113768
D12	15	spx14	0.928386	0.0110408
D12	16	spx14	0.92588	0.0058768
D12	17	spx14	0.927783	0.00512164
D12	18	spx14	0.93133	0.00601002
D12	19	spx14	0.933302	0.00532382
D12	20	spx14	0.933645	0.00300875
D12	21	spx14	0.933883	0.000588469
D12	22	spx14	0.936034	8.06071e-05
D12	23	spx14	0.934467	-0.00414396
D12	24	spx14	0.936704	-0.00456587
D12	25	spx14	0.934196	-0.00973196
D12	26	spx14	0.936251	-0.0103351
D12	27	spx14	0.943646	-0.00559754
D12	28	spx14	0.94087	-0.0110323
D12	29	spx14	0.949486	-0.00507481
D12	30	spx14	0.96268	0.00546123
D12	31	spx14	0.985003	0.0251262
D12	32	spx14	1.03129	0.0687514
D12	33	spx14	1.11535	0.150161
D12	34	spx14	1.26701	0.299159
D12	35	spx14	1.50233	0.53182
D12	36	spx14	1.77872	0.805548
D12	37	spx14	1.99105	1.01522
D12	38	spx14	2.17417	1.19569
D12	39	spx14	2.31011	1.32896
D12	40	spx14	2.45245	1.46865
E1	1	spx11	0.322143	-0.00390632
E1	2	spx11	0.323895	-0.0029447
E1	3	spx11	0.324943	-0.0026873
E1	4	spx11	0.328971	0.000551103
E1	5	spx11	0.33057	0.00136008
E1	6	spx11	0.330781	0.000780063
E1	7	spx11	0.333012	0.00222082
E1	8	spx11	0.328228	-0.00335314
E1	9	spx11	0.332918	0.000546575
E1	10	spx11	0.333327	0.000165517
E1	11	spx11	0.334194	0.000241806
E1	12	spx11	0.332305	-0.00243674
E1	13	spx11	0.337412	0.00187946
E1	14	spx11	0.338067	0.0017443
E1	15	spx11	0.340198	0.00308466
E1	16	spx11	0.336529	-0.00137363
E1	17	spx11	0.340285	0.00159119
E1	18	spx11	0.338327	-0.00115659
E1	19	spx11	0.336107	-0.00416731
E1	20	spx11	0.341238	0.000173599
E1	21	spx11	0.339434	-0.00242016
E1	22	spx11	0.344709	0.00206463
E1	23	spx11	0.344626	0.00119106
E1	24	spx11	0.35155	0.00732503
E1	25	spx11	0.366361	0.0213452
E1	26	spx11	0.387454	0.0416481
E1	27	spx11	0.429085	0.0824895
E1	28	spx11	0.490567	0.143181
E1	29	spx11	0.581386	0.23321
E1	30	spx11	0.688708	0.339741
E1	31	spx11	0.82136	0.471603
E1	32	spx11	0.920351	0.569804
E1	33	spx11	1.02614	0.674806
E1	34	spx11	1.15829	0.80616
E1	35	spx11	1.30255	0.949634
E1	36	spx11	1.44357	1.08986
E1	37	spx11	1.5719	1.2174
E1	38	spx11	1.72217	1.36689
E1	39	spx11	1.83382	1.47774
E1	40	spx11	1.96343	1.60656
E2	1	spx11	0.329295	-0.00149628
E2	2	spx11	0.331649	0.000713909
E2	3	spx11	0.332936	0.00185673
E2	4	spx11	0.332445	0.00122142
E2	5	spx11	0.332566	0.00119787
E2	6	spx11	0.331104	-0.000408457
E2	7	spx11	0.331825	0.000169043
E2	8	spx11	0.329182	-0.00261844
E2	9	spx11	0.33515	0.00320546
E2	10	spx11	0.331784	-0.000304994
E2	11	spx11	0.330396	-0.00183717
E2	12	spx11	0.332463	8.56648e-05
E2	13	spx11	0.331237	-0.00128406
E2	14	spx11	0.332315	-0.000350483
E2	15	spx11	0.331484	-0.00132589
E2	16	spx11	0.333501	0.000547382
E2	17	spx11	0.33205	-0.00104813
E2	18	spx11	0.330575	-0.00266771
E2	19	spx11	0.331789	-0.00159779
E2	20	spx11	0.330003	-0.00352726
E2	21	spx11	0.332378	-0.00129666
E2	22	spx11	0.337588	0.00376859
E2	23	spx11	0.340178	0.00621488
E2	24	spx11	0.349094	0.0149869
E2	25	spx11	0.361861	0.0276093
E2	26	spx11	0.382391	0.0479947
E2	27	spx11	0.422681	0.0881409
E2	28	spx11	0.494338	0.159654
E2	29	spx11	0.587572	0.252744
E2	30	spx11	0.693605	0.358632
E2	31	spx11	0.82493	0.489814
E2	32	spx11	0.921461	0.5862
E2	33	spx11	1.0232	0.687791
[truncated: 1,847 more rows]

## Sheet: BioGroup Analysis Result
Block Type	96alum
Chemistry	SYBR_GREEN
Experiment File Name	D:\ShuJu\LZM\spx 11-15zuzhi teyi.eds
Experiment Run End Time	2023-07-14 09:22:46 AM CST
Instrument Type	sds7500
Passive Reference	ROX
Biogroup Name	Target Name	Task	RQ	RQ Min	RQ Max	Cт Mean	ΔCт Mean	ΔCт SE	ΔΔCт
Analysis Type	Singleplex
Endogenous Control	spx11
RQ Min/Max Confidence Level	95.0
Reference Biogroup Name

## Sheet: Technical Analysis Result
Block Type	96alum
Chemistry	SYBR_GREEN
Experiment File Name	D:\ShuJu\LZM\spx 11-15zuzhi teyi.eds
Experiment Run End Time	2023-07-14 09:22:46 AM CST
Instrument Type	sds7500
Passive Reference	ROX
Sample Name	Target Name	Task	RQ	RQ Min	RQ Max	Cт Mean	ΔCт Mean	ΔCт SE	ΔΔCт
root	spx12	UNKNOWN	1	0.651806	1.5342	22.4188	-8.43342	0.222402	0
root	spx13	UNKNOWN	1	0.648265	1.54258	28.169	-2.68316	0.225232	0
root	spx14	UNKNOWN	1	0.41915	2.38578	30.0245	-0.827726	0.451823	0
strem	spx12	UNKNOWN	0.00174619	0.00131277	0.00232271	26.372	0.728148	0.148247	9.16157
strem	spx13	UNKNOWN	0.498402	0.425103	0.584339	23.9653	-1.67854	0.0826581	1.00462
strem	spx14	UNKNOWN	0.0155742	0.00754289	0.0321567	30.8208	5.17698	0.376728	6.0047
leafe	spx12	UNKNOWN	0.000112792	7.91149e-05	0.000160804	31.5817	4.68062	0.184279	13.114
leafe	spx13	UNKNOWN	0.0811806	0.0564988	0.116645	27.8407	0.939563	0.18834	3.62272
leafe	spx14	UNKNOWN	0.0313556	0.0202814	0.0484766	31.0685	4.1674	0.226392	4.99513
flower	spx12	UNKNOWN	0.00067597	0.000523776	0.000872386	26.806	2.09733	0.132546	10.5308
flower	spx13	UNKNOWN	0.0731386	0.0567807	0.0942091	25.7987	1.09007	0.131547	3.77322
flower	spx14	UNKNOWN	0.00802266	0.00265158	0.0242735	30.8426	6.13398	0.575279	6.9617
fruit	spx12	UNKNOWN	0.00104356	0.000798514	0.00136381	28.7126	1.47084	0.139072	9.90427
fruit	spx13	UNKNOWN	0.118229	0.0948296	0.147401	27.639	0.397191	0.114596	3.08035
fruit	spx14	UNKNOWN	0.00628684	0.00290607	0.0136006	33.7275	6.48572	0.400969	7.31345
seed	spx12	UNKNOWN	3.63097e-05	2.46459e-05	5.34935e-05	30.6211	6.31586	0.20134	14.7493
seed	spx13	UNKNOWN	0.154934	0.0371269	0.646554	24.3123	0.00711568	0.742358	2.69027
seed	spx14	UNKNOWN	0.00337083	0.000878298	0.012937	31.6902	7.38495	0.698851	8.21268
root	spx15	UNKNOWN	1	0.649904	1.53869	23.8535	-6.99873	0.22392	0
strem	spx15	UNKNOWN	0.00298702	0.00258166	0.00345603	27.0322	1.38835	0.0757834	8.38708
leafe	spx15	UNKNOWN	0.00412757	0.0029387	0.0057974	27.8229	0.921759	0.176526	7.92049
flower	spx15	UNKNOWN	0.00118456	0.000948054	0.00148007	27.4313	2.7227	0.115727	9.72143
fruit	spx15	UNKNOWN	0.00161107	0.00137683	0.00188518	29.5208	2.27903	0.0816425	9.27776
seed	spx15	UNKNOWN	0.000678662	0.000483324	0.000952947	27.8315	3.52629	0.176377	10.525
Analysis Type	Singleplex
Endogenous Control	spx11
RQ Min/Max Confidence Level	95.0
Reference Sample	root
