# Supplementary material for: Genome-wide identification and characterization of SPXdomain-containing genes family in eggplant
Source: PeerJ journal article supplement (doi:10.7717/peerj.17341), 2024-05-28
Supplement: 1-16_SPX_in_different_tissues.zip [file spx1-5 different tissues.xls]

## Sheet: Sample Setup
Block Type	96alum
Chemistry	SYBR_GREEN
Experiment File Name	D:\ShuJu\LZM\spx1-5 zuzhi chyi biaoda.eds
Experiment Run End Time	2023-07-13 07:21:08 AM CST
Instrument Type	sds7500
Passive Reference	ROX
Well	Sample Name	Sample Color	Biogroup Name	Biogroup Color	Target Name	Target Color	Task	Reporter	Quencher	Comments
A1	root	RGB(132,193,241)			SPX1	RGB(139,189,249)	UNKNOWN	SYBR	None
A2	root	RGB(132,193,241)			SPX1	RGB(139,189,249)	UNKNOWN	SYBR	None
A3	root	RGB(132,193,241)			SPX1	RGB(139,189,249)	UNKNOWN	SYBR	None
A4	strem	RGB(168,255,222)			SPX1	RGB(139,189,249)	UNKNOWN	SYBR	None
A5	strem	RGB(168,255,222)			SPX1	RGB(139,189,249)	UNKNOWN	SYBR	None
A6	strem	RGB(168,255,222)			SPX1	RGB(139,189,249)	UNKNOWN	SYBR	None
A7	leafe	RGB(223,221,142)			SPX1	RGB(139,189,249)	UNKNOWN	SYBR	None
A8	leafe	RGB(223,221,142)			SPX1	RGB(139,189,249)	UNKNOWN	SYBR	None
A9	leafe	RGB(223,221,142)			SPX1	RGB(139,189,249)	UNKNOWN	SYBR	None
A10	flower	RGB(247,255,168)			SPX1	RGB(139,189,249)	UNKNOWN	SYBR	None
A11	flower	RGB(247,255,168)			SPX1	RGB(139,189,249)	UNKNOWN	SYBR	None
A12	flower	RGB(247,255,168)			SPX1	RGB(139,189,249)	UNKNOWN	SYBR	None
B1	fruit	RGB(180,255,0)			SPX1	RGB(139,189,249)	UNKNOWN	SYBR	None
B2	fruit	RGB(180,255,0)			SPX1	RGB(139,189,249)	UNKNOWN	SYBR	None
B3	fruit	RGB(180,255,0)			SPX1	RGB(139,189,249)	UNKNOWN	SYBR	None
B4	seed	RGB(255,204,153)			SPX1	RGB(139,189,249)	UNKNOWN	SYBR	None
B5	seed	RGB(255,204,153)			SPX1	RGB(139,189,249)	UNKNOWN	SYBR	None
B6	seed	RGB(255,204,153)			SPX1	RGB(139,189,249)	UNKNOWN	SYBR	None
B7	root	RGB(132,193,241)			SPX2	RGB(208,243,98)	UNKNOWN	SYBR	None
B8	root	RGB(132,193,241)			SPX2	RGB(208,243,98)	UNKNOWN	SYBR	None
B9	root	RGB(132,193,241)			SPX2	RGB(208,243,98)	UNKNOWN	SYBR	None
B10	strem	RGB(168,255,222)			SPX2	RGB(208,243,98)	UNKNOWN	SYBR	None
B11	strem	RGB(168,255,222)			SPX2	RGB(208,243,98)	UNKNOWN	SYBR	None
B12	strem	RGB(168,255,222)			SPX2	RGB(208,243,98)	UNKNOWN	SYBR	None
C1	leafe	RGB(223,221,142)			SPX2	RGB(208,243,98)	UNKNOWN	SYBR	None
C2	leafe	RGB(223,221,142)			SPX2	RGB(208,243,98)	UNKNOWN	SYBR	None
C3	leafe	RGB(223,221,142)			SPX2	RGB(208,243,98)	UNKNOWN	SYBR	None
C4	flower	RGB(247,255,168)			SPX2	RGB(208,243,98)	UNKNOWN	SYBR	None
C5	flower	RGB(247,255,168)			SPX2	RGB(208,243,98)	UNKNOWN	SYBR	None
C6	flower	RGB(247,255,168)			SPX2	RGB(208,243,98)	UNKNOWN	SYBR	None
C7	fruit	RGB(180,255,0)			SPX2	RGB(208,243,98)	UNKNOWN	SYBR	None
C8	fruit	RGB(180,255,0)			SPX2	RGB(208,243,98)	UNKNOWN	SYBR	None
C9	fruit	RGB(180,255,0)			SPX2	RGB(208,243,98)	UNKNOWN	SYBR	None
C10	seed	RGB(255,204,153)			SPX2	RGB(208,243,98)	UNKNOWN	SYBR	None
C11	seed	RGB(255,204,153)			SPX2	RGB(208,243,98)	UNKNOWN	SYBR	None
C12	seed	RGB(255,204,153)			SPX2	RGB(208,243,98)	UNKNOWN	SYBR	None
D1	root	RGB(132,193,241)			SPX3	RGB(244,165,230)	UNKNOWN	SYBR	None
D2	root	RGB(132,193,241)			SPX3	RGB(244,165,230)	UNKNOWN	SYBR	None
D3	root	RGB(132,193,241)			SPX3	RGB(244,165,230)	UNKNOWN	SYBR	None
D4	strem	RGB(168,255,222)			SPX3	RGB(244,165,230)	UNKNOWN	SYBR	None
D5	strem	RGB(168,255,222)			SPX3	RGB(244,165,230)	UNKNOWN	SYBR	None
D6	strem	RGB(168,255,222)			SPX3	RGB(244,165,230)	UNKNOWN	SYBR	None
D7	leafe	RGB(223,221,142)			SPX3	RGB(244,165,230)	UNKNOWN	SYBR	None
D8	leafe	RGB(223,221,142)			SPX3	RGB(244,165,230)	UNKNOWN	SYBR	None
D9	leafe	RGB(223,221,142)			SPX3	RGB(244,165,230)	UNKNOWN	SYBR	None
D10	flower	RGB(247,255,168)			SPX3	RGB(244,165,230)	UNKNOWN	SYBR	None
D11	flower	RGB(247,255,168)			SPX3	RGB(244,165,230)	UNKNOWN	SYBR	None
D12	flower	RGB(247,255,168)			SPX3	RGB(244,165,230)	UNKNOWN	SYBR	None
E1	fruit	RGB(180,255,0)			SPX3	RGB(244,165,230)	UNKNOWN	SYBR	None
E2	fruit	RGB(180,255,0)			SPX3	RGB(244,165,230)	UNKNOWN	SYBR	None
E3	fruit	RGB(180,255,0)			SPX3	RGB(244,165,230)	UNKNOWN	SYBR	None
E4	seed	RGB(255,204,153)			SPX3	RGB(244,165,230)	UNKNOWN	SYBR	None
E5	seed	RGB(255,204,153)			SPX3	RGB(244,165,230)	UNKNOWN	SYBR	None
E6	seed	RGB(255,204,153)			SPX3	RGB(244,165,230)	UNKNOWN	SYBR	None
E7	root	RGB(132,193,241)			SPX4	RGB(255,191,168)	UNKNOWN	SYBR	None
E8	root	RGB(132,193,241)			SPX4	RGB(255,191,168)	UNKNOWN	SYBR	None
E9	root	RGB(132,193,241)			SPX4	RGB(255,191,168)	UNKNOWN	SYBR	None
E10	strem	RGB(168,255,222)			SPX4	RGB(255,191,168)	UNKNOWN	SYBR	None
E11	strem	RGB(168,255,222)			SPX4	RGB(255,191,168)	UNKNOWN	SYBR	None
E12	strem	RGB(168,255,222)			SPX4	RGB(255,191,168)	UNKNOWN	SYBR	None
F1	leafe	RGB(223,221,142)			SPX4	RGB(255,191,168)	UNKNOWN	SYBR	None
F2	leafe	RGB(223,221,142)			SPX4	RGB(255,191,168)	UNKNOWN	SYBR	None
F3	leafe	RGB(223,221,142)			SPX4	RGB(255,191,168)	UNKNOWN	SYBR	None
F4	flower	RGB(247,255,168)			SPX4	RGB(255,191,168)	UNKNOWN	SYBR	None
F5	flower	RGB(247,255,168)			SPX4	RGB(255,191,168)	UNKNOWN	SYBR	None
F6	flower	RGB(247,255,168)			SPX4	RGB(255,191,168)	UNKNOWN	SYBR	None
F7	fruit	RGB(180,255,0)			SPX4	RGB(255,191,168)	UNKNOWN	SYBR	None
F8	fruit	RGB(180,255,0)			SPX4	RGB(255,191,168)	UNKNOWN	SYBR	None
F9	fruit	RGB(180,255,0)			SPX4	RGB(255,191,168)	UNKNOWN	SYBR	None
F10	seed	RGB(255,204,153)			SPX4	RGB(255,191,168)	UNKNOWN	SYBR	None
F11	seed	RGB(255,204,153)			SPX4	RGB(255,191,168)	UNKNOWN	SYBR	None
F12	seed	RGB(255,204,153)			SPX4	RGB(255,191,168)	UNKNOWN	SYBR	None
G1	root	RGB(132,193,241)			SPX5	RGB(243,124,98)	UNKNOWN	SYBR	None
G2	root	RGB(132,193,241)			SPX5	RGB(243,124,98)	UNKNOWN	SYBR	None
G3	root	RGB(132,193,241)			SPX5	RGB(243,124,98)	UNKNOWN	SYBR	None
G4	strem	RGB(168,255,222)			SPX5	RGB(243,124,98)	UNKNOWN	SYBR	None
G5	strem	RGB(168,255,222)			SPX5	RGB(243,124,98)	UNKNOWN	SYBR	None
G6	strem	RGB(168,255,222)			SPX5	RGB(243,124,98)	UNKNOWN	SYBR	None
G7	leafe	RGB(223,221,142)			SPX5	RGB(243,124,98)	UNKNOWN	SYBR	None
G8	leafe	RGB(223,221,142)			SPX5	RGB(243,124,98)	UNKNOWN	SYBR	None
G9	leafe	RGB(223,221,142)			SPX5	RGB(243,124,98)	UNKNOWN	SYBR	None
G10	flower	RGB(247,255,168)			SPX5	RGB(243,124,98)	UNKNOWN	SYBR	None
G11	flower	RGB(247,255,168)			SPX5	RGB(243,124,98)	UNKNOWN	SYBR	None
G12	flower	RGB(247,255,168)			SPX5	RGB(243,124,98)	UNKNOWN	SYBR	None
H1	fruit	RGB(180,255,0)			SPX5	RGB(243,124,98)	UNKNOWN	SYBR	None
H2	fruit	RGB(180,255,0)			SPX5	RGB(243,124,98)	UNKNOWN	SYBR	None
H3	fruit	RGB(180,255,0)			SPX5	RGB(243,124,98)	UNKNOWN	SYBR	None
H4	seed	RGB(255,204,153)			SPX5	RGB(243,124,98)	UNKNOWN	SYBR	None
H5	seed	RGB(255,204,153)			SPX5	RGB(243,124,98)	UNKNOWN	SYBR	None
H6	seed	RGB(255,204,153)			SPX5	RGB(243,124,98)	UNKNOWN	SYBR	None
H7
H8
H9
H10
H11
H12

## Sheet: Results
Block Type	96alum
Chemistry	SYBR_GREEN
Experiment File Name	D:\ShuJu\LZM\spx1-5 zuzhi chyi biaoda.eds
Experiment Run End Time	2023-07-13 07:21:08 AM CST
Instrument Type	sds7500
Passive Reference	ROX
Well	Sample Name	Target Name	Task	Reporter	Quencher	RQ	RQ Min	RQ Max	Cт	Cт Mean	Cт SD	ΔCт	ΔCт Mean	ΔCт SE	HK Control ΔCт Mean	HK Control ΔCт SE	ΔΔCт	Automatic Ct Threshold	Ct Threshold	Automatic Baseline	Baseline Start	Baseline End	Efficiency	Tm1	Tm2	Tm3	Comments	NOAMP	OUTLIERRG	EXPFAIL
A1	root	SPX1	UNKNOWN	SYBR	None				20.4887	20.26	0.200068							TRUE	0.166041	TRUE	3	16	1	78.3704				N	N	N
A2	root	SPX1	UNKNOWN	SYBR	None				20.1173	20.26	0.200068							TRUE	0.166041	TRUE	3	15	1	78.3704				N	N	N
A3	root	SPX1	UNKNOWN	SYBR	None				20.174	20.26	0.200068							TRUE	0.166041	TRUE	3	15	1	78.5598				N	N	N
A4	strem	SPX1	UNKNOWN	SYBR	None				27.4958	27.4726	0.124087							TRUE	0.166041	TRUE	3	23	1	78.3704				N	N	N
A5	strem	SPX1	UNKNOWN	SYBR	None				27.5835	27.4726	0.124087							TRUE	0.166041	TRUE	3	23	1	78.5598				N	N	N
A6	strem	SPX1	UNKNOWN	SYBR	None				27.3386	27.4726	0.124087							TRUE	0.166041	TRUE	3	23	1	78.5598				N	N	N
A7	leafe	SPX1	UNKNOWN	SYBR	None				30.0411	29.9912	0.0498934							TRUE	0.166041	TRUE	3	25	1	78.5598				N	N	N
A8	leafe	SPX1	UNKNOWN	SYBR	None				29.9413	29.9912	0.0498934							TRUE	0.166041	TRUE	3	25	1	78.5598				N	N	N
A9	leafe	SPX1	UNKNOWN	SYBR	None				29.9912	29.9912	0.0498934							TRUE	0.166041	TRUE	3	26	1	78.3704				N	N	N
A10	flower	SPX1	UNKNOWN	SYBR	None				30.2592	30.4726	0.35439							TRUE	0.166041	TRUE	3	25	1	78.3704				N	N	N
A11	flower	SPX1	UNKNOWN	SYBR	None				30.2768	30.4726	0.35439							TRUE	0.166041	TRUE	3	26	1	78.181				N	N	N
A12	flower	SPX1	UNKNOWN	SYBR	None				30.8817	30.4726	0.35439							TRUE	0.166041	TRUE	3	26	1	78.181				N	Y	N
B1	fruit	SPX1	UNKNOWN	SYBR	None				31.2867	30.9331	0.431008							TRUE	0.166041	TRUE	3	28	1	78.3704				N	N	N
B2	fruit	SPX1	UNKNOWN	SYBR	None				31.0595	30.9331	0.431008							TRUE	0.166041	TRUE	3	26	1	78.5598				N	N	N
B3	fruit	SPX1	UNKNOWN	SYBR	None				30.453	30.9331	0.431008							TRUE	0.166041	TRUE	3	26	1	78.7492				N	N	N
B4	seed	SPX1	UNKNOWN	SYBR	None				25.6685	25.736	0.0882811							TRUE	0.166041	TRUE	3	20	1	78.7492				N	N	N
B5	seed	SPX1	UNKNOWN	SYBR	None				25.8359	25.736	0.0882811							TRUE	0.166041	TRUE	3	21	1	78.7492				N	N	N
B6	seed	SPX1	UNKNOWN	SYBR	None				25.7036	25.736	0.0882811							TRUE	0.166041	TRUE	3	21	1	78.7492				N	N	N
B7	root	SPX2	UNKNOWN	SYBR	None	1	0.790849	1.26446	24.3595	24.3039	0.0676135		4.0439	0.121928			0	TRUE	0.39471	TRUE	3	18	1	81.7793				N	N	N
B8	root	SPX2	UNKNOWN	SYBR	None	1	0.790849	1.26446	24.2286	24.3039	0.0676135		4.0439	0.121928			0	TRUE	0.39471	TRUE	3	18	1	81.7793				N	N	N
B9	root	SPX2	UNKNOWN	SYBR	None	1	0.790849	1.26446	24.3235	24.3039	0.0676135		4.0439	0.121928			0	TRUE	0.39471	TRUE	3	18	1	81.7793				N	N	N
B10	strem	SPX2	UNKNOWN	SYBR	None	245.566	210.14	286.964	23.5149	23.5765	0.0652835		-3.89607	0.0809518			-7.93997	TRUE	0.39471	TRUE	3	17	1	81.59				N	N	N
B11	strem	SPX2	UNKNOWN	SYBR	None	245.566	210.14	286.964	23.6449	23.5765	0.0652835		-3.89607	0.0809518			-7.93997	TRUE	0.39471	TRUE	3	18	1	81.59				N	N	N
B12	strem	SPX2	UNKNOWN	SYBR	None	245.566	210.14	286.964	23.5699	23.5765	0.0652835		-3.89607	0.0809518			-7.93997	TRUE	0.39471	TRUE	3	17	1	81.2112				N	N	N
C1	leafe	SPX2	UNKNOWN	SYBR	None	647.362	536.3	781.423	24.6377	24.6967	0.161877		-5.29453	0.0977984			-9.33843	TRUE	0.39471	TRUE	3	18	1	81.7793				N	N	N
C2	leafe	SPX2	UNKNOWN	SYBR	None	647.362	536.3	781.423	24.8798	24.6967	0.161877		-5.29453	0.0977984			-9.33843	TRUE	0.39471	TRUE	3	19	1	81.7793				N	N	N
C3	leafe	SPX2	UNKNOWN	SYBR	None	647.362	536.3	781.423	24.5726	24.6967	0.161877		-5.29453	0.0977984			-9.33843	TRUE	0.39471	TRUE	3	18	1	81.9687				N	N	N
C4	flower	SPX2	UNKNOWN	SYBR	None	1734.58	1144.28	2629.41	23.6232	23.7561	0.120748		-6.71648	0.216158			-10.7604	TRUE	0.39471	TRUE	3	17	1	81.9687				N	N	N
C5	flower	SPX2	UNKNOWN	SYBR	None	1734.58	1144.28	2629.41	23.8591	23.7561	0.120748		-6.71648	0.216158			-10.7604	TRUE	0.39471	TRUE	3	18	1	81.9687				N	N	N
C6	flower	SPX2	UNKNOWN	SYBR	None	1734.58	1144.28	2629.41	23.786	23.7561	0.120748		-6.71648	0.216158			-10.7604	TRUE	0.39471	TRUE	3	18	1	81.9687				N	N	N
C7	fruit	SPX2	UNKNOWN	SYBR	None	714.778	439.789	1161.71	25.4997	25.4956	0.0727946		-5.43746	0.252367			-9.48135	TRUE	0.39471	TRUE	3	19	1	81.9687				N	N	N
C8	fruit	SPX2	UNKNOWN	SYBR	None	714.778	439.789	1161.71	25.4209	25.4956	0.0727946		-5.43746	0.252367			-9.48135	TRUE	0.39471	TRUE	3	20	1	81.9687				N	N	N
C9	fruit	SPX2	UNKNOWN	SYBR	None	714.778	439.789	1161.71	25.5663	25.4956	0.0727946		-5.43746	0.252367			-9.48135	TRUE	0.39471	TRUE	3	20	1	81.9687				N	N	N
C10	seed	SPX2	UNKNOWN	SYBR	None	57.3439	51.9164	63.3389	23.9472	23.9383	0.01466		-1.79767	0.0516671			-5.84157	TRUE	0.39471	TRUE	3	18	1	81.7793				N	N	N
C11	seed	SPX2	UNKNOWN	SYBR	None	57.3439	51.9164	63.3389	23.9463	23.9383	0.01466		-1.79767	0.0516671			-5.84157	TRUE	0.39471	TRUE	3	17	1	81.59				N	N	N
C12	seed	SPX2	UNKNOWN	SYBR	None	57.3439	51.9164	63.3389	23.9214	23.9383	0.01466		-1.79767	0.0516671			-5.84157	TRUE	0.39471	TRUE	3	18	1	81.4006				N	N	N
D1	root	SPX3	UNKNOWN	SYBR	None	1	0.775106	1.29015	26.6884	26.6783	0.111995		6.4183	0.132376			0	TRUE	0.169391	TRUE	3	22	1	80.0749				N	N	N
D2	root	SPX3	UNKNOWN	SYBR	None	1	0.775106	1.29015	26.5615	26.6783	0.111995		6.4183	0.132376			0	TRUE	0.169391	TRUE	3	22	1	80.2643				N	N	N
D3	root	SPX3	UNKNOWN	SYBR	None	1	0.775106	1.29015	26.7848	26.6783	0.111995		6.4183	0.132376			0	TRUE	0.169391	TRUE	3	22	1	80.2643				N	N	N
D4	strem	SPX3	UNKNOWN	SYBR	None	906.232	710.283	1156.24	24.2665	24.0672	0.180781		-3.40543	0.126596			-9.82374	TRUE	0.169391	TRUE	3	19	1	80.4536				N	N	N
D5	strem	SPX3	UNKNOWN	SYBR	None	906.232	710.283	1156.24	24.0212	24.0672	0.180781		-3.40543	0.126596			-9.82374	TRUE	0.169391	TRUE	3	19	1	80.4536				N	N	N
D6	strem	SPX3	UNKNOWN	SYBR	None	906.232	710.283	1156.24	23.9138	24.0672	0.180781		-3.40543	0.126596			-9.82374	TRUE	0.169391	TRUE	3	19	1	80.4536				N	N	N
D7	leafe	SPX3	UNKNOWN	SYBR	None	625.723	543.267	720.694	26.9899	27.1201	0.116982		-2.87108	0.0734258			-9.28938	TRUE	0.169391	TRUE	3	22	1	80.4536				N	N	N
D8	leafe	SPX3	UNKNOWN	SYBR	None	625.723	543.267	720.694	27.1544	27.1201	0.116982		-2.87108	0.0734258			-9.28938	TRUE	0.169391	TRUE	3	22	1	80.2643				N	N	N
D9	leafe	SPX3	UNKNOWN	SYBR	None	625.723	543.267	720.694	27.2162	27.1201	0.116982		-2.87108	0.0734258			-9.28938	TRUE	0.169391	TRUE	3	23	1	80.2643				N	N	N
D10	flower	SPX3	UNKNOWN	SYBR	None	11047.1	6889.92	17712.7	23.6544	23.4595	0.234414		-7.01308	0.245318			-13.4314	TRUE	0.169391	TRUE	3	19	1	80.2643				N	N	N
D11	flower	SPX3	UNKNOWN	SYBR	None	11047.1	6889.92	17712.7	23.1994	23.4595	0.234414		-7.01308	0.245318			-13.4314	TRUE	0.169391	TRUE	3	18	1	80.0749				N	N	N
D12	flower	SPX3	UNKNOWN	SYBR	None	11047.1	6889.92	17712.7	23.5248	23.4595	0.234414		-7.01308	0.245318			-13.4314	TRUE	0.169391	TRUE	3	18	1	79.6961				N	N	N
E1	fruit	SPX3	UNKNOWN	SYBR	None	4778.61	2823.98	8086.15	25.1677	25.129	0.195818		-5.80407	0.273321			-12.2224	TRUE	0.169391	TRUE	3	21	1	80.2643				N	N	N
E2	fruit	SPX3	UNKNOWN	SYBR	None	4778.61	2823.98	8086.15	25.3026	25.129	0.195818		-5.80407	0.273321			-12.2224	TRUE	0.169391	TRUE	3	21	1	80.2643				N	N	N
E3	fruit	SPX3	UNKNOWN	SYBR	None	4778.61	2823.98	8086.15	24.9167	25.129	0.195818		-5.80407	0.273321			-12.2224	TRUE	0.169391	TRUE	3	20	1	80.4536				N	N	N
E4	seed	SPX3	UNKNOWN	SYBR	None	91.6989	69.1412	121.616	25.4238	25.6354	0.238299		-0.100531	0.14672			-6.51883	TRUE	0.169391	TRUE	3	20	1	80.4536				N	N	N
E5	seed	SPX3	UNKNOWN	SYBR	None	91.6989	69.1412	121.616	25.5889	25.6354	0.238299		-0.100531	0.14672			-6.51883	TRUE	0.169391	TRUE	3	21	1	80.2643				N	N	N
E6	seed	SPX3	UNKNOWN	SYBR	None	91.6989	69.1412	121.616	25.8936	25.6354	0.238299		-0.100531	0.14672			-6.51883	TRUE	0.169391	TRUE	3	21	1	80.2643				N	N	N
E7	root	SPX4	UNKNOWN	SYBR	None	1	0.724833	1.37963	20.3655	20.1449	0.209431		-0.115023	0.167221			0	TRUE	0.220844	TRUE	3	15	1	81.0218				N	N	N
E8	root	SPX4	UNKNOWN	SYBR	None	1	0.724833	1.37963	20.1205	20.1449	0.209431		-0.115023	0.167221			0	TRUE	0.220844	TRUE	3	15	1	81.0218				N	N	N
E9	root	SPX4	UNKNOWN	SYBR	None	1	0.724833	1.37963	19.9488	20.1449	0.209431		-0.115023	0.167221			0	TRUE	0.220844	TRUE	3	15	1	80.8324				N	N	N
E10	strem	SPX4	UNKNOWN	SYBR	None	26.35	20.2986	34.2055	22.8655	22.6379	0.199364		-4.83475	0.135577			-4.71973	TRUE	0.220844	TRUE	3	17	1	80.8324				N	N	N
E11	strem	SPX4	UNKNOWN	SYBR	None	26.35	20.2986	34.2055	22.4942	22.6379	0.199364		-4.83475	0.135577			-4.71973	TRUE	0.220844	TRUE	3	18	1	80.643				N	N	N
E12	strem	SPX4	UNKNOWN	SYBR	None	26.35	20.2986	34.2055	22.5539	22.6379	0.199364		-4.83475	0.135577			-4.71973	TRUE	0.220844	TRUE	3	17	1	80.2643				N	N	N
F1	leafe	SPX4	UNKNOWN	SYBR	None	43.4575	26.9458	70.0872	24.8267	24.4347	0.42726		-5.55656	0.248355			-5.44153	TRUE	0.220844	TRUE	3	20	1	80.643				N	N	N
F2	leafe	SPX4	UNKNOWN	SYBR	None	43.4575	26.9458	70.0872	24.498	24.4347	0.42726		-5.55656	0.248355			-5.44153	TRUE	0.220844	TRUE	3	20	1	80.643				N	N	N
F3	leafe	SPX4	UNKNOWN	SYBR	None	43.4575	26.9458	70.0872	23.9793	24.4347	0.42726		-5.55656	0.248355			-5.44153	TRUE	0.220844	TRUE	3	19	1	80.8324				N	N	N
F4	flower	SPX4	UNKNOWN	SYBR	None	87.6347	53.4936	143.565	23.9448	23.9041	0.267901		-6.56845	0.256491			-6.45343	TRUE	0.220844	TRUE	3	19	1	80.8324				N	N	N
F5	flower	SPX4	UNKNOWN	SYBR	None	87.6347	53.4936	143.565	23.6182	23.9041	0.267901		-6.56845	0.256491			-6.45343	TRUE	0.220844	TRUE	3	18	1	80.8324				N	N	N
F6	flower	SPX4	UNKNOWN	SYBR	None	87.6347	53.4936	143.565	24.1494	23.9041	0.267901		-6.56845	0.256491			-6.45343	TRUE	0.220844	TRUE	3	19	1	80.8324				N	N	N
F7	fruit	SPX4	UNKNOWN	SYBR	None	51.4763	31.1779	84.9902	25.031	25.1322	0.133722		-5.80086	0.260544			-5.68584	TRUE	0.220844	TRUE	3	20	1	80.8324				N	N	N
F8	fruit	SPX4	UNKNOWN	SYBR	None	51.4763	31.1779	84.9902	25.2838	25.1322	0.133722		-5.80086	0.260544			-5.68584	TRUE	0.220844	TRUE	3	20	1	80.8324				N	N	N
F9	fruit	SPX4	UNKNOWN	SYBR	None	51.4763	31.1779	84.9902	25.0819	25.1322	0.133722		-5.80086	0.260544			-5.68584	TRUE	0.220844	TRUE	3	20	1	80.643				N	N	N
F10	seed	SPX4	UNKNOWN	SYBR	None	6.61089	5.97888	7.30971	22.8783	22.8961	0.0196291		-2.83987	0.0522138			-2.72485	TRUE	0.220844	TRUE	3	17	1	80.643				N	N	N
F11	seed	SPX4	UNKNOWN	SYBR	None	6.61089	5.97888	7.30971	22.9172	22.8961	0.0196291		-2.83987	0.0522138			-2.72485	TRUE	0.220844	TRUE	3	18	1	80.4536				N	N	N
F12	seed	SPX4	UNKNOWN	SYBR	None	6.61089	5.97888	7.30971	22.8928	22.8961	0.0196291		-2.83987	0.0522138			-2.72485	TRUE	0.220844	TRUE	3	18	1	80.0749				N	N	N
G1	root	SPX5	UNKNOWN	SYBR	None	1	0.78022	1.28169	24.0202	23.906	0.0993164		3.64598	0.128959			0	TRUE	0.377776	TRUE	3	19	1	78.7492				N	N	N
G2	root	SPX5	UNKNOWN	SYBR	None	1	0.78022	1.28169	23.8572	23.906	0.0993164		3.64598	0.128959			0	TRUE	0.377776	TRUE	3	18	1	78.7492				N	N	N
G3	root	SPX5	UNKNOWN	SYBR	None	1	0.78022	1.28169	23.8404	23.906	0.0993164		3.64598	0.128959			0	TRUE	0.377776	TRUE	3	18	1	78.9386				N	N	N
G4	strem	SPX5	UNKNOWN	SYBR	None	1.00833	0.714235	1.42352	30.8178	31.1066	0.284472		3.63401	0.179185			-0.011968	TRUE	0.377776	TRUE	3	25	1	78.9386				N	N	N
G5	strem	SPX5	UNKNOWN	SYBR	None	1.00833	0.714235	1.42352	31.1155	31.1066	0.284472		3.63401	0.179185			-0.011968	TRUE	0.377776	TRUE	3	25	1	78.9386				N	N	N
G6	strem	SPX5	UNKNOWN	SYBR	None	1.00833	0.714235	1.42352	31.3865	31.1066	0.284472		3.63401	0.179185			-0.011968	TRUE	0.377776	TRUE	3	25	1	78.9386				N	N	N
G7	leafe	SPX5	UNKNOWN	SYBR	None	1.02578	0.555247	1.89507	Undetermined	33.6005	0.391395		3.60925	0.278253			-0.0367279	TRUE	0.377776	TRUE	3	39	1	65.3028				Y	N	Y
G8	leafe	SPX5	UNKNOWN	SYBR	None	1.02578	0.555247	1.89507	33.8772	33.6005	0.391395		3.60925	0.278253			-0.0367279	TRUE	0.377776	TRUE	3	28	1	78.7492				N	N	N
G9	leafe	SPX5	UNKNOWN	SYBR	None	1.02578	0.555247	1.89507	33.3237	33.6005	0.391395		3.60925	0.278253			-0.0367279	TRUE	0.377776	TRUE	3	27	1	78.7492				N	N	N
G10	flower	SPX5	UNKNOWN	SYBR	None	2.2202	1.47705	3.33724	33.0769	32.9679	0.094584		2.49529	0.211769			-1.15069	TRUE	0.377776	TRUE	3	27	1	78.5598				N	N	N
G11	flower	SPX5	UNKNOWN	SYBR	None	2.2202	1.47705	3.33724	32.9072	32.9679	0.094584		2.49529	0.211769			-1.15069	TRUE	0.377776	TRUE	3	27	1	78.5598				N	N	N
G12	flower	SPX5	UNKNOWN	SYBR	None	2.2202	1.47705	3.33724	32.9196	32.9679	0.094584		2.49529	0.211769			-1.15069	TRUE	0.377776	TRUE	3	27	1	78.181				N	N	N
H1	fruit	SPX5	UNKNOWN	SYBR	None	0.232428	0.11838	0.456351	Undetermined	36.6842	0.251489		5.75113	0.305853			2.10515	TRUE	0.377776	TRUE	3	39	1	61.7045				Y	N	Y
H2	fruit	SPX5	UNKNOWN	SYBR	None	0.232428	0.11838	0.456351	36.862	36.6842	0.251489		5.75113	0.305853			2.10515	TRUE	0.377776	TRUE	3	31	1	78.5598				N	N	N
H3	fruit	SPX5	UNKNOWN	SYBR	None	0.232428	0.11838	0.456351	36.5064	36.6842	0.251489		5.75113	0.305853			2.10515	TRUE	0.377776	TRUE	3	31	1	78.5598				N	N	N
H4	seed	SPX5	UNKNOWN	SYBR	None	0.0521431	0.0346841	0.0783905	33.5167	33.6433	0.356164		7.90736	0.211854			4.26138	TRUE	0.377776	TRUE	3	27	1	78.5598				N	N	N
H5	seed	SPX5	UNKNOWN	SYBR	None	0.0521431	0.0346841	0.0783905	33.3678	33.6433	0.356164		7.90736	0.211854			4.26138	TRUE	0.377776	TRUE	3	27	1	78.5598				N	N	N
H6	seed	SPX5	UNKNOWN	SYBR	None	0.0521431	0.0346841	0.0783905	34.0455	33.6433	0.356164		7.90736	0.211854			4.26138	TRUE	0.377776	TRUE	3	28	1	78.5598				N	N	N
Analysis Type	Singleplex
Endogenous Control	SPX1
RQ Min/Max Confidence Level	95.0
Reference Sample	root

## Sheet: Raw Data
Block Type	96alum
Chemistry	SYBR_GREEN
Experiment File Name	D:\ShuJu\LZM\spx1-5 zuzhi chyi biaoda.eds
Experiment Run End Time	2023-07-13 07:21:08 AM CST
Instrument Type	sds7500
Passive Reference	ROX
Well	Cycle	1	2	3	4	5
A1	1	15654.8	3066.06	9632.6	68036.4	2382.93
A2	1	29145.5	3892.97	14143	93412.2	2059.35
A3	1	27012.4	3636.52	15277.7	93774.5	2213.07
A4	1	29108.9	4111.48	15177.4	88013.3	2827.43
A5	1	29914.6	4627.33	16438.5	92114.7	2626.54
A6	1	40348	6246.83	17592	93487.7	3761.2
A7	1	31128.4	4860.46	16268.4	88780.5	2798.41
A8	1	150604	20869.1	54989.9	291441	12625
A9	1	33779	4811	16741	97701.2	2477.28
A10	1	28299.6	4183.96	15144.1	92189	2789.47
A11	1	28330.3	4060.11	14846.5	98649.9	2147.65
A12	1	30826.6	4722.85	13406.3	93363.5	3065.55
B1	1	28580.7	4245.14	13860.4	94002	2258.43
B2	1	32210.8	4621.5	15925.3	99170.9	2187.99
B3	1	28339.3	3882.9	16759.6	97323.5	2588.85
B4	1	28079.5	4009.55	16536	94349.4	2259.23
B5	1	31934.8	4565.16	19295.3	108972	2717.56
B6	1	25081	3387.79	17497.2	94238	1304.66
B7	1	26738.5	3480.86	17567.2	93838.2	1544.5
B8	1	93664.1	12059.4	53596	296852	6261.36
B9	1	34430.8	5304.25	17635.3	95191.2	2418.61
B10	1	33553.8	4846.33	16615.7	94397.6	2192.76
B11	1	39694	5688.59	17008.7	101012	3623.42
B12	1	50338.7	8302.52	17358.3	103841	5129.03
C1	1	31891.5	4585.41	16060	98966.5	2660.13
C2	1	38176.4	5581.97	22190.4	135404	4217.2
C3	1	26452.9	4171.32	17619	98902.9	2740.45
C4	1	28427.5	4126.25	16815.9	91699.3	2466.19
C5	1	29363.9	4224.52	18616.9	96456.7	2298.99
C6	1	27073.8	4339.25	18681.8	95154.8	2035.65
C7	1	27523.9	4389.79	18952.7	96463.7	1895.58
C8	1	29349.6	4151.82	18000.5	92307.9	2161.64
C9	1	39721.1	7106.8	19094.4	93423	3338.53
C10	1	30498.2	4773.98	16893.8	94521.7	2059.59
C11	1	30767.2	5288.47	16490.7	95423.4	1805.73
C12	1	35403.1	5158.49	16188	102790	3032.36
D1	1	38369.9	5663.48	16570.5	101648	2890.15
D2	1	30850.7	4736.82	17880.5	105215	2595.63
D3	1	51686.5	8968.5	22327.4	109932	6162.04
D4	1	34468.7	5638.37	19024.8	97621.3	4030.85
D5	1	34427.2	4990.63	19802.5	101881	2348.69
D6	1	40378.9	6666.93	20612.2	99211.8	3695.68
D7	1	27106	3901.96	18484.3	94173.9	1940.59
D8	1	29084.6	5481.36	18982.3	95536.5	2250.7
D9	1	34985.4	4902	17907.5	96388.4	2675.33
D10	1	37742.4	6331.9	18462.5	97745.3	3184.36
D11	1	39986.1	6426.15	18578.9	105733	2662.7
D12	1	99310.4	12191.6	19905.1	108097	4105.98
E1	1	41743.5	5802.78	16858.2	102676	3557.73
E2	1	34305.8	5524.63	17126.8	98201.7	2785.64
E3	1	48760.1	6500.67	20138	105922	4659.71
E4	1	32337.6	5196.42	19792.8	102351	2626.5
E5	1	31166.8	4899.86	19312.9	97869.9	2486.1
E6	1	119955	19160.6	28246.1	108569	9448.74
E7	1	33535.1	5630.1	19868.9	95427.1	4191.95
E8	1	32107.6	5625.09	19419.2	93247.4	3873.35
E9	1	31481.7	5234.15	18891.2	95283	2412.48
E10	1	31623.1	5084.45	17933.3	97345.4	2803
E11	1	36249.6	5853.09	18112	101727	4374.83
E12	1	43185.2	6894.72	17533.9	105454	3847.52
F1	1	38715.9	6652.29	17654.6	107031	6866.73
F2	1	33132.8	5298.68	17472.2	102998	2750.01
F3	1	31296.7	5191.67	19511.7	109768	2953.42
F4	1	30558.2	4670.8	20022.9	105859	2796.79
F5	1	33403.1	5113.61	20674.7	108174	2422.52
F6	1	45490.5	7954.83	22835.8	106781	4395.46
F7	1	27848.3	5060.89	20330.2	101542	4044.75
F8	1	30336.1	4801.53	19429.2	97776.7	3403.54
F9	1	29854.4	4867.24	18260.4	96879.1	3915.34
F10	1	29646.2	4836.95	18417.9	102240	3482.14
F11	1	30003.7	5495.26	18780.1	106306	3199.78
F12	1	45423.1	7681.29	17908.2	104437	3938.83
G1	1	38027.9	6011.39	17253.6	112750	3349.62
G2	1	46417	7414.23	19286.7	113070	2834.42
G3	1	33593.2	5664.58	18944.2	108929	2973.79
G4	1	31007.4	4771.97	18992.6	107707	2365.35
G5	1	29647	4322.02	19633.3	106014	2315.27
G6	1	31007.4	5027.81	20082.3	105265	2438.24
G7	1	28722.7	4693.1	18075.7	95524.8	2592.32
G8	1	32607.5	5823.16	19864.7	105807	3497.54
G9	1	44841.4	5772.7	19078.1	106145	3594.25
G10	1	36480.9	6610.86	18621.4	104092	2497.27
G11	1	58104.1	9945.12	21079.4	113785	7399.81
G12	1	41742.5	6644.09	18481.3	121591	2897.33
H1	1	50323	8149.38	18341.6	116060	6853.97
H2	1	38837.4	6176.18	18095.2	114501	3580.44
H3	1	32765.9	5927.97	19573.6	112848	4366.38
H4	1	30692.5	5356.09	18519.6	106520	2840.31
H5	1	31405.7	5387.56	19223.3	107061	3005.63
H6	1	37584.5	6411.82	26804.8	148729	4561.81
H7	1	28344.6	6235.98	4063.25	5231.89	2862.28
H8	1	26074.1	4267.3	2725.52	4745.69	2491.89
H9	1	30535.8	4790.48	3099.26	6695.31	4290.94
H10	1	36768.4	8310.13	5802.78	7271.09	3954.01
H11	1	38982.7	6676.99	4579.51	6536.12	3757.1
H12	1	40355.1	5344.57	3133.8	5434.92	2825.35
A1	2	14882.6	2826.61	9632.6	68104.7	2681.34
A2	2	28919.6	4181.21	14135.3	93277.5	2063.5
A3	2	27111.8	3926.42	15236.7	92761.9	1889.23
A4	2	29076.9	4392.64	15048.4	87557.4	2508.58
A5	2	29816.5	4659.25	16286.2	91798.7	2980.16
A6	2	40563.7	6189.51	17849.8	93419.4	3508.01
A7	2	31738.9	4989.45	16509.3	89013.1	2992.08
A8	2	150614	20470.7	54602.3	290770	12637.3
A9	2	34184.3	4816.09	16672.8	97357.6	2483.21
A10	2	28421.5	4332.78	15071.3	91522.5	2725.37
A11	2	27849.3	3903.26	14765.5	96982.1	2674.98
A12	2	30908.7	4749.63	13346.5	92959	3011.52
B1	2	29061.3	4498.37	13980.6	92773.4	2608.62
B2	2	32446.9	4273.55	15626.6	97886.6	1999.03
B3	2	28803.3	4077.11	16673.8	96381.9	2439
B4	2	28422.5	3876.99	16482.1	93167.3	2212.86
B5	2	31932.6	4486.5	19310.6	108377	2768.24
B6	2	25158.6	3425.73	17606.9	94113.4	1572.12
B7	2	26626.2	3733.49	17571.7	93356.5	1864.05
B8	2	94565	12987.3	53694.6	296477	7104.35
B9	2	34610.8	5312.46	17425.8	94479.5	2409.4
B10	2	33980.5	4959.9	16593.8	93569.2	2273.72
B11	2	40363.1	5714.28	16966.2	100415	3281.63
B12	2	51758.8	8427.79	17117.9	103342	5030.64
C1	2	32466.2	5306.9	16258.1	99102.2	2323.69
C2	2	38150.6	5762.36	22100.7	133617	4428.15
C3	2	26375.3	4261.52	17574.9	98334.3	2064.34
C4	2	29069.6	3984	16718.4	91037.5	2611.96
C5	2	29524	4425.12	18613.8	96230.8	2382.24
C6	2	27214.9	4115.81	18601.4	94441.3	1931.96
C7	2	27520	4132.55	18817.4	95830.4	1960.71
C8	2	29430.7	4196.84	17926.1	91811.3	2032.21
C9	2	39494.4	7115.49	18797.7	92683.7	2896.57
C10	2	30613.9	4828.78	16755.8	93531.2	2084.46
C11	2	31044.2	5346.4	16432.9	95002.8	1802.41
C12	2	36407	5312.9	16050.8	102400	2477.57
D1	2	39187.7	5920.57	16561.5	101548	2756.47
D2	2	30529.5	4665.4	17795.3	103846	2041.93
D3	2	51855.2	9215.05	22232.2	109031	6105.16
D4	2	34510.1	5574.96	19019.5	96984.7	3823.59
D5	2	34543.2	4961.34	19931.9	101623	2305.75
D6	2	40625.4	6866.5	20496.1	98502.7	3721.16
D7	2	27301.9	4244.75	18403	93267.2	1646.31
D8	2	29038.1	5303.6	18870.5	95199.3	2214.34
D9	2	34557.6	4990.41	17821.2	95630.4	2825.5
D10	2	37905.6	6339.41	18353.3	97404.5	3085.67
D11	2	40084.6	6452.07	18681.9	104328	2574.08
D12	2	102227	12485.1	20170.9	108032	3997.67
E1	2	41663	5915.34	16770.9	102614	3832.53
E2	2	34101.6	5715.28	17003.4	97403.4	2740.79
E3	2	48666.4	6572.24	20124	105151	4458.34
E4	2	32545.7	5358.31	19823	101268	2620.86
E5	2	31076	4728.25	19234.5	97024.8	2313.05
E6	2	118422	19009.4	27855.9	108034	9619.25
E7	2	33655.2	5599.74	20038.5	94893.2	4306.5
E8	2	32242.3	5747.82	19444.7	92752.6	4077.77
E9	2	31723.6	5362.76	18970.1	94517.5	2102.04
E10	2	31853.7	5009.82	17695	96744	2711.19
E11	2	36119.5	5953.31	17992.4	101017	4359.54
E12	2	43543.8	6781.03	17513.6	105541	3750.53
F1	2	39411.9	6666.58	17768.4	106755	6607.73
F2	2	33722.1	5236.81	17585.3	101933	2731.62
F3	2	31405.4	5220.3	19412.5	108498	2820.97
F4	2	30653.3	4861.82	19749.4	104812	2886.36
F5	2	33739	5263.41	20548.3	107258	2241.06
F6	2	45672	7755.34	22725.2	105938	4440.9
F7	2	27598	4978.27	20307.7	100418	4258.28
F8	2	30731.3	5282.62	19369.5	96869.5	3180.87
F9	2	30362.1	4905.06	18199.2	96239.1	4214.82
F10	2	29823.1	4894.75	18230.3	101103	3834.2
F11	2	30420.5	5278.95	18559.4	104648	2734.14
F12	2	45778.5	7872.61	17984.3	103995	4218.52
G1	2	37868.6	5832.43	17299	111965	3152.43
G2	2	46163	7519.5	19177.3	111425	3418.59
G3	2	33879.9	5416.48	18935.3	107541	2790.48
G4	2	30927.5	4642.87	18853.8	106523	2214.25
G5	2	29720	4627.09	19497.9	105255	2376.81
G6	2	31111.9	4832.64	20078.6	104331	2312.42
G7	2	28833.1	4589.04	18021.3	94420.4	2573.49
G8	2	32455.5	5983.66	19714.1	105053	3493.3
G9	2	45430.5	5889.25	19069.5	105390	3406.79
G10	2	37021.7	6593.85	18574.8	102785	3032.99
G11	2	59109.7	9949.62	21059.8	112229	7902.14
G12	2	41555.3	6680.48	18574.6	121156	3061.58
H1	2	50342.3	8170.74	18162	115522	6689.67
H2	2	38716.5	6694.9	17903.4	113942	3634.62
H3	2	32185.8	5969.33	19440.1	112590	4319.75
H4	2	30503.6	5642.24	18476.5	105915	2411.58
H5	2	31578.9	5507.43	19162.6	106463	3016.89
H6	2	37469.1	6448.41	26678.8	147528	4236.79
H7	2	28310.1	6173.06	3942.67	5203.95	2768.62
H8	2	26107.2	4326.74	2637.33	4842.2	2432.57
H9	2	30748	4588.07	3229.47	6651.56	3997.82
H10	2	36638.3	8103.61	5958.14	7444.33	3997.84
H11	2	39330.1	6825.29	4475.53	7004.59	4169.92
H12	2	39930.4	4793.83	3089	5121.88	3278.59
A1	3	15538.3	2776.37	9538.29	67958.7	2371.4
A2	3	29075.8	4051.66	14086.3	92794.7	2361.05
A3	3	27489.7	3943.47	15201.1	93041.8	1986.76
A4	3	29400.7	4366.14	15274.4	87376.8	2605.71
A5	3	30195.4	4540.86	16256.2	91438.4	2656.01
A6	3	40184	6322.91	17798.3	93165.7	3931.73
A7	3	32067.7	4972.12	16667.9	88752.3	3064.83
A8	3	150788	21111	54905.4	289206	12928.5
A9	3	34182	4738.8	16582.2	96925.5	2343.77
A10	3	28514.6	4561.12	14990.7	90789.3	2591.65
A11	3	28128.4	4212.17	14656.8	96404.5	2626.2
A12	3	31463.2	5203.47	13502.3	92882.5	3096.83
B1	3	29177.5	4021.82	13791.3	92868.7	2767.64
B2	3	32118.9	4652.73	15722.8	97273.9	1703.22
B3	3	28602.1	4323.7	16815.2	96056.8	2316.28
B4	3	28465.8	4086.59	16310.1	93160.5	2255.99
B5	3	31823.7	4458.49	19218.8	107451	2903.39
B6	3	25158.6	3415.79	17433.4	93848.4	1320.07
B7	3	26735.8	3715.13	17515.6	93171.3	1713.15
B8	3	94526.8	13025	53365.2	294656	6633.98
B9	3	34473.9	5235.77	17525	94546.8	2552.16
B10	3	34209.4	5143.6	16569	93472.4	2146.36
B11	3	40428.4	5815.84	16853.6	99967.3	3282.78
B12	3	51729.6	8383.16	17486.8	102962	5174.01
C1	3	32562.6	5333.9	16222.4	98837.6	2564.8
C2	3	38643	5779.38	21809.6	133407	4457.07
C3	3	26490	4104.24	17466.9	97960.6	2732.58
C4	3	29033.6	3867.61	16821.4	91051.8	2268.6
C5	3	29435.3	4184.99	18567.4	95651.5	2352.15
C6	3	27464.3	4273.63	18555.2	94254.9	2011.45
C7	3	27424.3	4293.73	18809.1	95675.6	1883.21
C8	3	29407.6	4239.25	17848.1	91488.1	2100.52
C9	3	38860.1	7010.26	18702.8	92321.8	3118.9
C10	3	30602	4826.83	16706.9	93473.7	2178.93
C11	3	31463	5523.48	16349	94390.8	2031.03
C12	3	36695.9	5499.38	15993.2	102063	2811.86
D1	3	38970.3	6009.08	16582.5	101072	2752.62
D2	3	30938.8	4758.71	17641.9	103809	2308.93
D3	3	51593	8908.44	22226.9	108515	6012.46
D4	3	34646.7	5457.34	19024.8	96897.4	3995.95
D5	3	34540.6	4959.45	19793.6	101190	2391.63
D6	3	40496.5	6708.4	20423.9	98233.9	3833.07
D7	3	27255.3	4021.11	18377.4	92938.1	2001.63
D8	3	28953.4	5427.41	18952.5	95486.8	2322.49
D9	3	34612.7	4917.03	17730.2	95125	2763.33
D10	3	38078	6158.41	18430.9	96442.5	3207.59
D11	3	39678.2	6483.17	18603.6	104747	2515.7
D12	3	103961	12651.8	20345	107924	4160.63
E1	3	41348.4	5988.85	16817.8	101774	3470.68
E2	3	34101.6	5772.69	16999.2	96710.3	2742.88
E3	3	48701.2	6669.83	20130.5	104754	4579.73
E4	3	32451	5407.23	19695.6	101191	2746.7
E5	3	31285.1	4601.75	19140.5	97049.4	2476.64
E6	3	117531	19049.2	27863.2	107365	9419.4
E7	3	33487.2	5831.91	19832.2	94722.3	4037.64
E8	3	32093.5	5994.2	19568.2	92878.1	3847.44
E9	3	31586.4	5129.33	18952.8	94297.1	2343.29
E10	3	32187.4	5148.42	17742.8	96139.9	2782.8
E11	3	36839.5	6298.29	17921.6	100411	4632.91
E12	3	43644.6	6949.89	17576.2	105030	3927.11
F1	3	39465.3	6720.9	17840.4	106388	7172.94
F2	3	33791.1	5590.19	17415.6	101437	2793.96
F3	3	31440.2	5108.47	19338.1	108103	3039.01
F4	3	31461.9	4958.17	19763.9	104289	2764.61
F5	3	33439.4	5364.63	20604.1	106902	2286
F6	3	45667.1	7748.54	22814.8	105475	4404.23
F7	3	27994.3	5004.77	20255.3	100294	3733.11
F8	3	30532.2	5031.52	19321.8	96520.8	3122.31
F9	3	30520.3	5280.02	18017.1	95858.9	4025.94
F10	3	29703.2	4854.8	18170.3	100597	3791.39
F11	3	30602.6	5415.78	18415.9	104476	3246.54
F12	3	45883	7852.02	18144	103946	4427.87
G1	3	38260.4	6259.4	17140.7	111792	3251.67
G2	3	46024.7	7640.16	19129.8	111323	3349.68
G3	3	34191.8	5699.12	18755.9	107268	3060.58
G4	3	31158.5	4928.51	19045.6	105901	2413.54
G5	3	29838.1	4516.36	19476.1	104473	2509.33
G6	3	31332.3	4937.79	19999.4	103983	2532.04
G7	3	28777.2	4545.31	17924	94073.4	2500.55
G8	3	32536.1	5892.76	19857.3	104723	3665.42
G9	3	45072	5914.96	19075.5	105056	3334.95
G10	3	37670.5	6553.55	18547.9	102471	2660.27
G11	3	59316	9921.47	20943.3	112120	8163.66
G12	3	41372.1	6556.73	18406.1	120642	3203.03
H1	3	50592.9	7816.57	18412.5	115816	7486.36
H2	3	38927.3	6478.23	17968.9	113484	3836.35
H3	3	32723.8	6130.43	19461.7	111850	4235.82
H4	3	30767.9	5547.41	18415.8	105627	2750.18
H5	3	31506.8	5511.2	19133	106179	2926.81
H6	3	38055.9	6563.49	26723	147669	4632.93
H7	3	27995.6	6440.46	4049.25	5361.46	2744.8
H8	3	26269.5	4101.59	2850.51	4773.16	2696.27
H9	3	30507.2	4714.25	3305.36	6887.8	4273.44
H10	3	36935	8526.72	5944.46	7324.17	3910.19
H11	3	39850	7065.56	4766.68	6795.13	3912.75
H12	3	40145.2	5473.37	3273.66	5341.43	3130.34
A1	4	15555.2	2813.21	9607.45	67718	2904.78
A2	4	29237.7	4061.38	14133.8	93088.3	2624.01
A3	4	27545.1	4200.68	15064.4	93055.3	2053.03
A4	4	29734.8	4344.25	14897.8	86820.4	2817.93
A5	4	30053.3	4600.57	16343.2	90938.2	2478.22
A6	4	40788.3	6457.35	17811.2	92955.4	3896.16
A7	4	32035.6	4871.04	16458.4	88657	3067.67
A8	4	151301	20465	54721.8	289274	12766
A9	4	34655.2	4674.73	16639.2	96040	2396.19
A10	4	28929	4439.57	14961.6	90696.7	2898.89
A11	4	27993.9	3888.9	14718.1	96000.5	2506.56
A12	4	31362.9	5136.51	13293.7	92337.9	3196.36
B1	4	28876.9	4402.66	13740.3	92357.8	2373.47
B2	4	32584.7	4578.38	15749.7	97815.3	2128.04
B3	4	28511.8	4097.55	16714.2	96827	2633.69
B4	4	28423.7	3830.54	16553.2	93187.7	2488.92
B5	4	32074.6	4425.09	19263.5	107598	3050.61
B6	4	25168.7	3650.68	17357.5	93878.2	1251.17
B7	4	26952.2	3832.26	17385.1	92960.1	1714.04
B8	4	94226.4	13173.4	53570.7	295651	7351.75
B9	4	34760.2	5339.85	17583	94371.2	2355.98
B10	4	33767.7	5435.94	16659.4	93526.3	2372.45
B11	4	40679.2	6104.18	16945.5	99594.5	3592.24
B12	4	51963.3	8609.22	17184.2	102695	5324.41
C1	4	32649	5132.67	16329.5	98487.5	2644.43
C2	4	38672.2	5534.32	22034.7	133760	4400.93
C3	4	26938.4	4252.27	17484.3	98141.7	2542.45
C4	4	28015	3777.09	16850.2	90752.7	2359.3
C5	4	29468.1	4207.72	18539.5	95964.1	2404.31
C6	4	27015.3	4142.39	18527.2	94052	2053.79
C7	4	27495.3	4436.64	18857.5	95704.6	1804.05
C8	4	29289.1	4216.75	17911.6	91603.6	2244.33
C9	4	38920.4	6959.82	18709.1	92459.8	2794.86
C10	4	30770.1	4782.78	16931.7	93129.8	2146.11
C11	4	31774	5522.39	16477.6	94045.5	1934.94
C12	4	37172.1	5596.77	16049.7	101815	2618.64
D1	4	39480.2	6095.48	16762.4	101017	3233.51
D2	4	30749.8	4777.14	17644.1	104022	2133.85
D3	4	51454.8	8776.74	22201.6	108882	6552.83
D4	4	34279.1	5354.04	18769.4	96713.2	4120.73
D5	4	34559	5155.98	19904	101203	2458.53
D6	4	40317.2	6618.55	20504.3	98175.8	3789.4
D7	4	27022.4	3908.87	18308	93132.5	1709.18
D8	4	29208.4	5374.35	18811.8	94910.8	1846.06
D9	4	34476.3	5053.17	17715.4	95346.4	2972.8
D10	4	38151.3	6211.87	18297.8	96479	3420.46
D11	4	40397.8	6199.09	18780.9	104653	2689.8
D12	4	105019	12845.8	20287.3	107699	4063.25
E1	4	41885.2	5949.8	16804.7	101742	3648.98
E2	4	34288.9	5638.37	17039.3	97132.4	3135.02
E3	4	48679.8	6772.07	19957	104898	4685.11
E4	4	32598.7	5162.62	19783.6	101317	2834.03
E5	4	31288.4	4751.25	19313.8	97123	2415.17
E6	4	117029	18804.8	27753.1	107303	9433.15
E7	4	33483.2	5650.64	19696.6	94808.2	4046.16
E8	4	32078.5	5790.24	19301.4	92590.7	3974.12
E9	4	31747.7	5236.8	18873	94420.3	2366.66
E10	4	32030.1	4925.42	17709.4	96200.4	3222.58
E11	4	36361.1	6125.8	18074.7	100671	4540.19
E12	4	43705.8	6959.08	17496.5	105060	3860.79
F1	4	39401.5	6863.83	18007.9	105958	7398.77
F2	4	34293.7	5474.84	17521.7	101425	3074.99
F3	4	31606.4	5118.31	19435.5	108420	2837.19
F4	4	31500.8	4767.99	19746	104288	2682.87
F5	4	33641.7	5273.94	20505.1	107080	2260.56
F6	4	45773.8	7621.59	22669.2	105349	4466.4
F7	4	27492.3	4982.17	20329.4	100836	4111.53
F8	4	30580	5164.5	19317.8	96811.2	3190.76
F9	4	30462.3	5070.01	18200	95862.2	4128.89
F10	4	29966.5	4912.6	18201.1	100854	3858.66
F11	4	31183.8	5533.5	18443.6	104505	3332.11
F12	4	46725.8	8121.42	17999.1	103680	4517.24
G1	4	37897.8	6367.9	17409.2	111212	3585.47
G2	4	46524.3	7668.55	19140.9	111123	3336.55
G3	4	34145.1	5653.68	18943.3	107342	3000.36
G4	4	31315	4673.53	18836.2	106175	2458.47
G5	4	29849.1	4445.9	19617.8	104517	2580.33
G6	4	30996	5063.1	19971.6	104028	2280.4
G7	4	28692.3	4727.78	17923.2	94121.3	2582.12
G8	4	32817.1	5616.79	19665	104630	3503.48
G9	4	45388.1	5943.24	19121.9	104831	3364.74
G10	4	37752.2	6875.04	18452.1	102543	2951.48
G11	4	59284.7	9991.29	20898.6	111872	8260.64
G12	4	41635.5	6713.24	18661.2	119860	2699.99
H1	4	50342.3	8014.12	18310.1	116143	7390.26
H2	4	38440	6570	17977.1	113297	3576.98
H3	4	32709.8	6093.42	19380.6	111460	4654.43
H4	4	30735.4	5643.07	18483.7	104991	2396.15
H5	4	31756.7	5340.81	19195.2	105898	3215.81
H6	4	37995.9	6577.21	26824.3	147448	4382.86
H7	4	28465.9	6479.78	4103.71	5116.28	3093.26
H8	4	26330.4	4196.68	2766.49	4955.61	2538.34
H9	4	30968.1	4716.88	3190.67	6841.43	4049.44
H10	4	37038.6	8543.84	6111.54	7415.29	4214.96
H11	4	39759.5	6422.93	4777.62	6835.67	3862
H12	4	40675.7	5063.28	3078.13	5461.83	3287.07
A1	5	15602.2	2811.54	9618.46	67960.3	2367.07
A2	5	29540.8	4312.38	14072.5	93064.1	2442.71
A3	5	27618.4	4200.68	15224.4	92702.5	2274.33
A4	5	29789.8	4131.07	14985.7	86611.7	2550.81
A5	5	30463.8	4791.01	16344.3	91392.1	2673.69
A6	5	40523	6258.29	17708	93321.8	3938.01
A7	5	31817.1	5114.6	16485.8	88662.8	3011.92
A8	5	150219	21441.2	54622.7	287966	13418.9
A9	5	34651.8	4754.05	16637.2	96441.6	2405.09
A10	5	29483.8	4457.74	14998.6	90685.4	2894.47
A11	5	28006.8	4113.99	14663.7	95758.3	2712.15
A12	5	31767.8	4946.05	13325.7	92352.3	3681.22
B1	5	28973.5	4304.96	13683.9	92206.7	2989.25
B2	5	32184.5	4227.46	15979.1	97591.5	1969.06
B3	5	28973.1	4202.32	16752	96278.1	2457.88
B4	5	28625	4026.54	16585.3	92858.2	2435
B5	5	31778.5	4638.42	19486	107523	2868.4
B6	5	25239.9	3437.48	17442.8	93509.1	1231.22
B7	5	26821.8	3972.13	17431.3	92868.4	1984.77
B8	5	94102.8	12731	53438.4	295017	6579.01
B9	5	34300.5	5287.81	17577.4	94345.9	2080.6
B10	5	34078.9	5239.4	16704.1	93927.5	2162.16
B11	5	41166.6	5845.02	17007.6	99509.2	3318.58
B12	5	51633.8	8492.59	17076.4	102249	4861.97
C1	5	32913.2	5151.07	16178.6	98830.8	2669.1
C2	5	38962.1	5401.58	22002.5	134247	4133.84
C3	5	26663.8	4616.55	17545.8	98415.1	2335.46
C4	5	28376.8	4244.78	16783.8	91132	2608.72
C5	5	29250.2	4435	18460	95628	2331.09
C6	5	27088.3	4268.64	18569.1	94467.3	2070.21
C7	5	27429	4293.73	18917.6	95710.4	1741.39
C8	5	29172.2	4226.27	17938.8	91640.7	2137.37
C9	5	38429.6	7065.05	18824	92461.6	3249.42
C10	5	30657.4	5061.71	16817.8	93332.5	2283.35
C11	5	31685.5	5426.2	16495.1	94344.3	2054.22
C12	5	37404.5	5343.78	16062.4	101769	2732.44
D1	5	39354.3	6219.81	16753.4	101421	2649.71
D2	5	30899.4	4754.1	17799.8	103958	2405.23
D3	5	51213.9	8696.66	22117	108774	5994.56
D4	5	34376.3	5451.2	18911.4	97081.5	3689.3
D5	5	34418.4	5025.59	20014.5	101390	2214.88
D6	5	40157.1	6589.18	20464.1	98281.1	3590.15
D7	5	27012.8	4186.9	18270.6	92892.9	1950.61
D8	5	29173.5	5548.57	18900.3	94913.6	1978.45
D9	5	34597.7	4945.32	17758.1	95269.8	2590.2
D10	5	37979.8	6509.15	18494.2	96800.6	3439.81
D11	5	39954.4	6431.33	18660.3	104682	2585.55
D12	5	106054	12861.4	20311.9	107636	4307.7
E1	5	42081	5972.77	16825.5	101862	3827.29
E2	5	33813.9	5547.38	17129.9	97111.5	3122.5
E3	5	48201	6641.02	20149.2	104724	4523.27
E4	5	32230	5396.55	19613.1	101052	2733.55
E5	5	31093.8	4660.13	19319.3	96921.2	2585.39
E6	5	116458	18804.8	27782.2	106921	9204.89
E7	5	33167.6	5651.53	19873.6	94705.5	4267.69
E8	5	32313	5893.12	19324	92965.6	3896.38
E9	5	31499.1	5315.19	18918.4	94133.4	2333
E10	5	31872.9	4951.19	17900.8	96421.6	2644.17
E11	5	36419.8	6168.2	17978	100930	4313.66
E12	5	43768.7	6868.8	17479.4	104749	3796.12
F1	5	39566.3	6888.13	17781.5	106051	7060.66
F2	5	34538.2	5416.12	17471.2	101373	3099.51
F3	5	31643.8	5227.46	19407.2	108399	3023.7
F4	5	31147.2	5018.49	19705.1	104457	2742
F5	5	33516.4	5386.5	20552.5	106801	2369.1
F6	5	45400.5	7715.29	22618.5	105834	4380.31
F7	5	27837.5	4890.97	20270.6	100457	3918.61
F8	5	30757	5126.95	19335.6	96440.2	3053.04
F9	5	30543.6	5150.48	18185.1	95811.1	4257.36
F10	5	29787.9	4745.16	18173.7	100804	3685.68
F11	5	30967.7	5323.22	18319.9	104275	2979.9
F12	5	46911.8	8111.13	18097.3	103775	4277.27
G1	5	38114.2	6281.95	17107	111324	3112.48
G2	5	46651.9	7895.66	19073.5	111145	3573.93
G3	5	34540.6	5797.27	18877.9	107214	3085.37
G4	5	31332.3	4973.69	19064.8	106108	2654.49
G5	5	29903	4326.67	19562.5	104363	2280.57
G6	5	31052	4882.33	19940.8	104256	2377.19
G7	5	28682.4	4737.58	18006.7	94201.2	2630.75
G8	5	32786.4	5873.93	19767.4	104645	3523.83
G9	5	45228.7	5874.68	19023	105502	3454.09
G10	5	37797.8	6732.65	18633.9	102372	2881.89
G11	5	59665.8	10225.5	21067.4	111943	8348.9
G12	5	41652.9	6607.69	18387.9	120107	3047.9
H1	5	50251.7	7982.09	18336.9	115868	7512.7
H2	5	38190.3	6363.53	17925.6	113167	3851.34
H3	5	32517.9	6072.74	19427.8	111301	4759.08
H4	5	30581.4	5673.58	18420.6	104920	2617.82
H5	5	31973.8	5395.85	19297.3	105503	3083.69
H6	5	38381.1	6603.12	26729	147249	4434.86
H7	5	28413.5	6663.03	4074.92	5179.9	2666.22
H8	5	26496.8	4258.21	2793.57	4881.64	2367.54
H9	5	30816.5	4669.56	3332.95	6972.68	4359.19
H10	5	37244.9	8517.65	5969.86	7422.3	3932.1
H11	5	40160	6898.87	4640.81	6992.2	3830.42
H12	5	40695.5	5340.13	3241.07	5366.93	3148.69
A1	6	15850.2	2903.64	9671.9	67775.4	2233.01
A2	6	29866.5	3975.55	14103.2	92735.7	2394.27
A3	6	27538.6	4170.84	15210.7	92826.8	2044.27
A4	6	29537.6	4126.46	14932	86889.3	2504.36
A5	6	29911.2	4754.98	16165	91146.1	2318.12
A6	6	40509.8	6267.67	17832.6	92668	3901.39
A7	6	32051.6	4965.38	16520.1	88502.3	2855.09
A8	6	151458	21031.3	54322.6	289012	12802.8
A9	6	34500.9	4753.04	16713.6	96090.9	2658.25
A10	6	29334.3	4388.44	15132.9	90581.5	2725.37
A11	6	28171.4	4160.69	14846.5	95947.3	2274.26
A12	6	31109.3	5059.13	13432.8	92322	3726.72
B1	6	28545.6	4105.56	13723.9	92595.3	2681.36
B2	6	32386.3	4620.02	15677.5	97685.2	1855.69
B3	6	28815.7	4024.72	16707.9	96386.9	2549.92
B4	6	28671.8	3954.03	16807.8	93221.6	2365.99
B5	6	32046	4588.86	19315.3	107774	2928.73
B6	6	25214.9	3529.62	17611.6	93661.6	1521.35
B7	6	26643.4	3866.36	17582.6	93076.9	1611.96
B8	6	94927.2	12566.5	53373.7	295155	7217.36
B9	6	34448	5286.9	17613.8	94543.9	2426.9
B10	6	33798.7	5262.12	16564	93546.2	2296.43
B11	6	40974.7	5961.76	16888.1	99947.5	3197.34
B12	6	51715	8293.88	17108.2	102395	5743.28
C1	6	32970.8	5106.9	16299.5	98909.4	3051.52
C2	6	38967.2	5850.86	22132.8	134496	4713.94
C3	6	26742.6	4155.12	17616.7	98460	2330.96
C4	6	28692	3908.56	16892.3	90934.1	2167.1
C5	6	29565.4	4444.88	18534.3	95852.8	2340.12
C6	6	27146	4046.86	18552.5	94419.6	1856.79
C7	6	27626.5	4351.68	18840	95741	1547.63
C8	6	29500.6	4118.06	17964.2	91705.7	2169.73
C9	6	38320.1	6867.64	18609.6	92518.3	3000.09
C10	6	30733.5	4828.78	16782.8	93693.6	2196.83
C11	6	32127	5615.31	16467.8	94291.2	1927.21
C12	6	37600.9	5444.74	16131.5	101821	2848.61
D1	6	39426.1	6183.99	16760.4	101280	2690.1
D2	6	31136	4837.04	17945.4	103924	2574.84
D3	6	51064.5	8790.43	22174.1	108785	5838.66
D4	6	34397.5	5649.62	18799.1	96751.1	3865.89
D5	6	34418.4	5019.92	19980.7	101164	2252.82
D6	6	40135.5	6745.55	20619.5	98188.5	3828.52
D7	6	27064.2	4118.69	18451.4	93066.5	1943.33
D8	6	29258.2	5632.58	18961.8	94987.3	2231.12
D9	6	34372.6	4824.21	17912.1	95416.5	2683.94
D10	6	37968.6	6271.89	18467.3	96702.7	3105.99
D11	6	40206.3	6348.39	18940.6	104803	2544.89
D12	6	107056	12866.3	20552.2	107518	4322.61
E1	6	41818	5983.11	16907.3	102056	3736.04
E2	6	34686.7	5593.96	17007.7	96911.4	2777.3
E3	6	48289.2	6506.25	19997.1	104969	4415.05
E4	6	32330.3	5338.74	19762.5	101326	2984.27
E5	6	31227.6	4763.63	19041.8	96767.7	2494.61
E6	6	115883	18714.1	27699.4	107080	9366.23
E7	6	33398	5813.16	19672.1	94186.5	3997.88
E8	6	32306.4	5488.82	19474.8	92722.8	3698.68
E9	6	31716.9	5508.1	18810.4	94226	2215.18
E10	6	31886.9	5011.6	17742.8	96253.6	2810.35
E11	6	36623.3	6034.26	18016.3	100691	4527.77
E12	6	43598.9	6987.51	17567.3	104548	3912.19
F1	6	39238.3	6982.47	17946.4	105838	7287.77
F2	6	35025.1	5680.37	17557	101707	2772.5
F3	6	31601.2	5214.04	19419.6	108290	3105.69
F4	6	31256.6	5013.47	19962.4	104375	2615.03
F5	6	33726.2	5405.93	20486.8	106990	2490.35
F6	6	45514.8	7914.03	22790.7	105563	4603.51
F7	6	27824.6	5134.16	20149.7	100182	4143.69
F8	6	30419.1	5019.78	19434.9	96647.7	3116.54
F9	6	30399	5090.93	18278.6	95814.4	4088.9
F10	6	29801.3	4975.49	18283.4	100470	3982.71
F11	6	31059.7	5424.84	18455.5	104270	3258.48
F12	6	46520.6	8226.95	18256.2	103269	4517.24
G1	6	37760.4	6545.46	17430	111477	3524.9
G2	6	46561.3	7534.88	19136.5	111242	3517.05
G3	6	34163.9	5659.13	19048.5	107476	2729.37
G4	6	31392.5	4821.19	18933.3	105787	2343.3
G5	6	29817.4	4592.24	19606.1	104137	2527.48
G6	6	31100.6	4954.35	20000.1	103920	2321.35
G7	6	28713.5	4544.55	17996.8	94257.6	2584.48
G8	6	32597.5	5819.06	19759.1	104622	3469.56
G9	6	45045.7	5848.11	19079.8	105307	3464.6
G10	6	38064.7	6688.77	18594.5	102672	3106.25
G11	6	59494.4	10487.9	21188.3	112237	8406.65
G12	6	41612.8	6691.4	18592.9	120282	3223.56
H1	6	50064.7	7912.68	18169.9	116037	7066.31
H2	6	38410.5	6442.55	17825	112938	3630.01
H3	6	32664.5	6031.38	19426.8	111342	4258.62
H4	6	31010.2	5554.83	18484.5	104784	2652.74
H5	6	32119.5	5600.16	19214.4	105565	2837.48
H6	6	38367.6	6651.13	26759.1	146963	4204.67
H7	6	28587.9	6385.41	4146.49	5150.42	2793.22
H8	6	26144.4	4277.09	2889.39	4905.59	2631.95
H9	6	30897	4481.16	3366.58	6964.8	4593.68
H10	6	37087.4	8138.87	6046.07	7547.48	4236.87
H11	6	40274.6	6620.66	4726.18	7065.4	4313.17
H12	6	40726.9	5283.87	3061.84	5155.88	2826.76
A1	7	15619.1	2622.31	9462.84	66793.8	2429.06
A2	7	29256.6	4250.85	14025	92723.6	2424.72
A3	7	27729.2	4374.05	15198.4	93160.7	1820.47
A4	7	29489	4119.54	15050.7	86827.2	2745.08
A5	7	30448	4478.06	16256.2	91041.1	2610.83
A6	7	40524.1	6407.32	17720.9	92971.6	4031.12
A7	7	31778.5	5092.46	16685.5	88285.3	2799.35
A8	7	150641	20789.4	54730.6	288786	13504.7
A9	7	34694.4	4681.85	16685.1	95899.7	2651.33
A10	7	29049.7	4271.44	15140.8	90449.3	2334.14
A11	7	28251.5	4046.94	14753.9	95439.4	2082.61
A12	7	31047.3	4972.83	13542.6	91950.8	3096.83
B1	7	28822.1	3786.53	13682.1	92221.1	3327.59
B2	7	32658.5	4654.22	15681.8	98043.3	1884.35
B3	7	28758.2	4465.53	16854.3	96294.4	2109.79
B4	7	28758.4	4012.94	16648.4	93375.6	2319.62
B5	7	31842.4	4687.99	19330.6	107884	2903.39
B6	7	25172.4	3477.23	17537.5	93580.7	1463.32
B7	7	26484.1	3847.13	17492	92844.1	1992.76
B8	7	94562.1	12930.6	53750.8	295677	7870.98
B9	7	34223.9	5338.02	17698.9	94304.8	2437.03
B10	7	34031.8	5292.74	16589.9	93793.8	2150.31
B11	7	40929.9	6020.13	16867.4	99801.4	3805.86
B12	7	51630.6	8675.46	17094.4	102144	5099.52
C1	7	33437.9	5245.55	16376.7	98779.4	2840.68
C2	7	38716.8	5508.79	22202.2	134068	4375.41
C3	7	26528.2	4255.74	17487.8	98431.2	2725.83
C4	7	28574.6	4145.64	16895.7	91445.3	2065.6
C5	7	29301.3	4206.73	18678.9	95924.3	2501.61
C6	7	27257.4	4058.49	18687	94521	2066.75
C7	7	27596.4	4654.18	18956	95808.1	1649.87
C8	7	29354.7	4282.54	17927.9	91600	2084.34
C9	7	38325.2	6943.3	18737.1	92229.5	3154.91
C10	7	30723.6	5014.73	16841.8	93878.2	2001.91
C11	7	31685.5	5698.38	16369.7	94248	2152.51
C12	7	37648.4	5521.94	16138.4	101718	3050.14
D1	7	39606	6227.19	16777.4	101150	2736.27
D2	7	31268.2	4807.09	17926.4	103855	2392.1
D3	7	51281	9014.86	22091.6	108680	5970.33
D4	7	34448.5	5587.23	18893.4	96867.9	4042.48
D5	7	34416.6	5185.27	19861.2	101274	2331.71
D6	7	40198.8	6747.28	20513.5	98315.6	3621.08
D7	7	27042.5	4068.6	18563.7	93304.2	1831.26
D8	7	29186	5625.51	19003.7	95225.1	1993.37
D9	7	34417.4	5098.26	17868.5	95275.5	2878.11
D10	7	38026.1	6415.37	18390.7	96903.4	3240.49
D11	7	39639	6610.7	18862.3	104943	2589.72
D12	7	108326	13256.3	20553.1	107932	4412.04
E1	7	42083.4	6078.44	16821.1	102070	3926.93
E2	7	34671.9	5632.95	17173.2	97180.3	3051.58
E3	7	48173.3	6541.57	20216.3	105005	4609.84
E4	7	32539.1	5182.19	19854.2	101314	2580.48
E5	7	31140.9	4716.75	19043.7	96817.7	2326.28
E6	7	116175	18619.1	27473.8	107486	9605.5
E7	7	33519.7	5831.02	19806.8	94704.6	4212.78
E8	7	32502.7	5591.7	19423.9	92791.6	3820.57
E9	7	31882.4	5426.18	18850.3	94259.3	2274.09
E10	7	31835.3	5024.93	17757.3	96770.1	2926.95
E11	7	36565.6	6201.93	17999.1	101016	4789.66
E12	7	43761.8	6816.14	17582.7	104425	3654.36
F1	7	40105	6702.32	17714.8	105893	7660.32
F2	7	35125.4	5644.72	17638.8	101706	2914.54
F3	7	31527.2	5269.51	19559.5	108276	3175.96
F4	7	31298.6	4908.74	19882.3	104496	2963.76
F5	7	33723.9	5396.21	20592.4	107118	2622.63
F6	7	45307	7464.41	22832.7	105832	4405.02
F7	7	27867	4898.77	20314.9	100302	3762.79
F8	7	30585.1	5177.8	19327.5	96822.4	3141.28
F9	7	30576	5115.88	18224.8	95877.1	3895.77
F10	7	30145.9	4972.94	18168.6	101036	3971.35
F11	7	31468.3	5493.25	18557.4	104837	3503.24
F12	7	46655.2	8218.37	18198.9	103520	4436.15
G1	7	38336.4	6208.67	17249.7	111308	2979.73
G2	7	46648.3	7502.94	19176.2	111325	3102.44
G3	7	34560.3	5795.45	18976.9	107381	2847.15
G4	7	31651.7	4943.03	18865.9	105952	2411.09
G5	7	30294.1	4582.95	19504.1	104970	2268.73
G6	7	31060.6	5071.75	19997.2	104216	2557.36
G7	7	28785	4767.74	18064.9	94337.5	2345.25
G8	7	32983.7	5932.07	19650.1	104464	3547.57
G9	7	44990.6	5861.83	19196.7	105122	3306.92
G10	7	37934.8	7001.32	18552.4	102271	2771.08
G11	7	60308.8	10587	21194.8	112362	8388.13
G12	7	41341.3	6597.98	18598.6	119751	3034.21
H1	7	50691.2	8314.9	18503.9	115654	7084.91
H2	7	38316.5	6352.06	17947.8	113085	4034.62
H3	7	32749.7	6085.8	19382.6	111032	4095.94
H4	7	30600.1	5604.31	18475.7	104913	2504.96
H5	7	31780.5	5561.71	19258.8	105426	2885.52
H6	7	38377.3	6790.6	26785.3	146938	4349.97
H7	7	28450.1	6527.76	4177.61	5264.47	2781.32
H8	7	26427.8	4334.43	2860.92	4784.43	2792.74
H9	7	30680.4	4700.23	3344.16	6944.68	4698.68
H10	7	37007.1	8344.38	5937.62	7673.65	4134.28
H11	7	40155.2	6851.74	4714.14	7174.64	3660.1
H12	7	39907.2	5449.68	3228.85	5712.54	2736.4
A1	8	15728.1	2900.29	9803.94	67666.7	2744.77
A2	8	29378.9	4194.17	14074.1	92735.7	2178.37
A3	8	27613.5	4111.16	15328.4	93222.9	2148.05
A4	8	29873	4051.56	15239	86899.4	2924.57
A5	8	30233.7	4366.88	16382.6	90894	2584.31
A6	8	40421.7	6188.46	17900.3	92553.1	4021.71
A7	8	31804.2	5205.09	16598.4	88574.3	3005.31
A8	8	151445	20450.8	54657.7	288324	13170.6
A9	8	34286.8	4860.83	16516.1	95537.8	2499.04
A10	8	29232	4361.18	15121.7	90396.2	2820.42
A11	8	27925.2	4112.79	14664.9	95656.8	2580.9
A12	8	31625.6	4986.22	13507.9	91820.7	3371.25
B1	8	28484.2	4261.09	13811.3	91913.5	3023.09
B2	8	32317.4	4587.3	15875.7	98246.2	1811.38
B3	8	28863.6	4317.31	16888.4	96839.5	2451.98
B4	8	28753.7	3745.57	16671.4	93424.3	2526.67
B5	8	32057	4713.84	19495.4	107976	2734.45
B6	8	25408	3299.25	17468.1	93775.9	1420.71
B7	8	26771.1	3813.91	17532.8	93301.6	1689.19
B8	8	95153.9	13157.2	53815.6	294985	8011.48
B9	8	34447	5170.04	17638.1	94210.5	2483.08
B10	8	33892.8	5351.99	16555.1	94026.3	2210.54
B11	8	41060.4	5885.88	16907.6	99579.3	3156.92
B12	8	51718.2	8488.27	17330.7	102002	5242.89
C1	8	33048.5	5482.37	16350.2	98445.3	2771.15
C2	8	38948.4	5692.59	22200.5	134254	4164.46
C3	8	26622.1	4499.75	17697.9	98705.7	2270.21
C4	8	28592.5	3893.48	16872.4	91417.8	2185.45
C5	8	29784.2	4498.25	18660.3	95760.8	2330.08
C6	8	27279.1	4051.02	18620.7	94519.3	1980.35
C7	8	27377.3	4415.2	18946	96086.2	1723.25
C8	8	29255	4261.76	18095.7	92076.8	2105.91
C9	8	38275.1	6728.5	18696.4	92785.1	2982.08
C10	8	30960.9	4986.35	16945.7	93732.9	1907.44
C11	8	31700.2	5464.46	16509.2	94721.7	2374.5
C12	8	37509.8	5773.75	16170.7	101410	2618.64
D1	8	39481.3	5983.79	16827.3	101796	3219.08
D2	8	31014.2	4388.93	17737.1	104452	2510.28
D3	8	51132.6	8887.37	22142.3	108914	6078.82
D4	8	34385	5547.34	18839.4	96817.4	4148.22
D5	8	34681.2	4914.1	19976.7	101298	2156.96
D6	8	40535	6702.35	20568.3	98409.1	4334.38
D7	8	27185.5	3945.99	18358.2	93456.1	1677.29
D8	8	28873.6	5463.67	19055	95512.6	2102.46
D9	8	34402.5	4751.71	17824.9	95610.5	2748.02
D10	8	38067.8	6314.09	18481.7	97066.6	3112.76
D11	8	40202	6255.08	18820	105191	2338.46
D12	8	108910	13253.4	20506.8	107827	4368.32
E1	8	42638.3	6165.74	16830.9	102142	3774.85
E2	8	34961.7	5733.7	16976	97373.1	2864.9
E3	8	48150.1	6672.62	20115.6	105255	4470.57
E4	8	32300.1	5183.08	19930.3	101587	2622.74
E5	8	31328.1	4759.21	19183.8	97276.6	2572.15
E6	8	115624	18710.7	27645.7	107489	9238.8
E7	8	33430.4	5647.07	19798.3	94901.6	3903.21
E8	8	32064.3	5917.49	19494.6	93062.3	3817.69
E9	8	31573.1	5237.68	18910.2	94611	2457.36
E10	8	31943.6	5080.01	17886.4	96706	2939.8
E11	8	36665.4	6072.8	18141.7	100943	4632.91
E12	8	43790.2	7055.22	17404.6	104088	4144.32
F1	8	40168.8	7279.78	18034	106631	7408.98
F2	8	34809.8	5701.35	17538.8	101624	3125.06
F3	8	31553.3	5392.97	19383.3	108334	3078.66
F4	8	31779.1	4701.8	19928.3	104745	2776.79
F5	8	33467.3	5373.54	20598.2	107249	2268.19
F6	8	45108.9	7758.36	22730.7	105643	4338.06
F7	8	27966.2	5010.23	20305.3	100506	4293.74
F8	8	30446.3	4975.97	19375.9	96997.2	3246.84
F9	8	30395.3	5040.24	18228.9	96131.1	4206.31
F10	8	29863.3	4831	18239.7	100997	3972.22
F11	8	31363.8	5741.76	18702.9	104947	3237.59
F12	8	46755.1	8180.62	18252.9	102984	4300.44
G1	8	37868.6	6159.35	17409.2	111094	3469.48
G2	8	46662.6	7746.62	19438.1	111276	3280.76
G3	8	34621.5	5831.8	19102.4	107896	3065.89
G4	8	31270.4	4884.94	19105.8	106301	2856.23
G5	8	30096.4	4619.34	19610.7	104770	2658.42
G6	8	31123.9	4862.16	20092.5	104361	2243.92
G7	8	28533	4773.78	18081.8	94176.9	2657.42
G8	8	32775.6	5829.71	19898.9	104822	3657.79
G9	8	45246.5	5724.71	19205.3	105406	3202.68
G10	8	38115.6	6610.86	18516.6	102684	2706.06
G11	8	60394.6	10304.4	21095.7	112229	8547.21
G12	8	41669	6804.24	18533.6	119566	3118.62
H1	8	50016.5	7971.41	18248.6	115821	7145.36
H2	8	37890.9	6527.94	17874.1	113017	3691.11
H3	8	32765.9	6255.61	19494.5	110958	4325.97
H4	8	30544.2	5691.72	18405.4	104946	2867.91
H5	8	32074.2	5583.58	19363.2	105605	3116.72
H6	8	38448.5	6830.24	26779.3	147213	4656.64
H7	8	28391	6725.95	4133.27	5277.67	2854.34
H8	8	26179.6	4227.45	2816.48	5021.12	2491.17
H9	8	30899.6	4853.57	3320.88	7005.92	4228.81
H10	8	37287.6	8381.65	6067.57	7438.32	4048.63
H11	8	40035.8	6851.74	4535.73	6658.87	3882.3
H12	8	40740.1	5236.49	3344.26	5476	3152.93
A1	9	15782.6	2739.53	9583.87	67388.7	2325.27
A2	9	29576.6	3653.3	14051.1	92290.8	2323.69
A3	9	27846.5	4447.95	14934.4	93235.1	2144.3
A4	9	29899.9	4462.94	15234.4	86988.6	2332.26
A5	9	30216.8	4533.65	16286.2	91079.2	2580.38
A6	9	40858.7	6367.72	17848.8	92813.3	3747.6
A7	9	31891	4792.11	16629.7	88700.8	2927.84
A8	9	150363	20948.8	55170.6	287749	12297.1
A9	9	34506.7	4978.79	16600.6	95962.8	2431.79
A10	9	29827.3	4883.75	15234.8	90468.5	2819.31
A11	9	28148.5	4128.36	14732	95679.2	2417.12
A12	9	31476	5032.35	13564.9	91838.1	3291.63
B1	9	28958.1	3778.55	13927.8	92057.4	2319.33
B2	9	32574.9	4533.77	15749.7	98209.8	1971.67
B3	9	28604.9	4139.72	16916.2	96479.4	2451.98
B4	9	28502.1	3862.26	16704.6	93547.8	2415.59
B5	9	32158.3	4701.99	19325.9	107651	2898.57
B6	9	25240.8	3675.98	17649	93888.4	1266.58
B7	9	26780.2	3781.56	17511.9	93326.8	1771.74
B8	9	94847.7	13073.6	53497.5	295014	7736.59
B9	9	34485.4	5437.54	17665.3	94610.3	2176.38
B10	9	34236.1	4964.84	16772.6	94047.3	2352.7
B11	9	41265.1	5814.67	16875.4	99546.6	3301.26
B12	9	51984.4	8604.9	17265.7	101692	5501.52
C1	9	33526.8	4984.2	16555.3	98990.4	2706.11
C2	9	38970.7	5973.39	22258.1	134670	4395.82
C3	9	26846.8	4367.91	17769.9	98294	2661.7
C4	9	28474.1	3910.72	16830.3	91365.1	2691.87
C5	9	29490.2	4343.1	18692.3	96025.4	2547.75
C6	9	27420.2	4104.18	18660.8	94848.7	1921.6
C7	9	27714.4	4295.31	19052.1	95821.3	1840.33
C8	9	29220	4240.99	18110.3	92008.1	1998.96
C9	9	38384.6	6872.86	18700.1	92474.4	2902.87
C10	9	30610.9	5094.98	16961.7	93776.3	1866.66
C11	9	32099.8	5679.8	16553.9	94660.8	1714.06
C12	9	38004	5398.41	16159.2	102118	2834.39
D1	9	39760.5	6042.8	16805.4	101863	2940.17
D2	9	31316.9	4839.34	17882.7	104453	2315.5
D3	9	51301.3	8955.85	22205.8	108920	5954.53
D4	9	34175.2	5407.23	18989.8	97164.6	3660.75
D5	9	34507.2	5028.42	20143.9	101591	2047.11
D6	9	40304.4	6571.9	20547.3	98447.3	3787.58
D7	9	26836.2	4191.22	18442.3	93325.9	1834
D8	9	28582.1	5430.06	19014	95521.8	2003.63
D9	9	34692.1	4999.25	17913.1	95567.9	2736.54
D10	9	38139.2	6291.58	18487.5	97199.1	3350.79
D11	9	40004.1	6391.93	18903.5	105091	2489.63
D12	9	109382	13378.2	20723.4	107743	4464.71
E1	9	42088.2	5981.96	16941.1	102112	3865.05
E2	9	34664.5	5726.11	17131	97332.5	2782.51
E3	9	48119.8	6880.82	20058.7	105140	4343.54
E4	9	32570.1	5078.12	19868.8	101244	2730.73
E5	9	31138.4	4695.52	19231.7	96913.1	2622.27
E6	9	115154	18590.6	27653.9	107501	9611.91
E7	9	33637.3	5797.98	19909.4	94938	4256.33
E8	9	32470.2	5895.83	19457.9	93293	3945.33
E9	9	31495.8	5208.61	18927.4	94348.4	2601.36
E10	9	31905.2	5044.47	17914.3	96753.9	3082.11
E11	9	36685.9	6239.51	18030.7	101071	4562.18
E12	9	43677.3	6941.53	17503	104423	3883.17
F1	9	39726.5	7135.42	17880.9	106385	7734.32
F2	9	35250.8	5551.39	17710.5	101963	2971.77
F3	9	31966.6	5231.04	19470.1	108406	3165.15
F4	9	31364.4	5067.09	20025.4	104613	2815.92
F5	9	34091.5	5519.3	20531.7	107387	2393.69
F6	9	45477.4	7799.17	22647.3	105796	4318.93
F7	9	27757.7	5078.82	20288.3	100720	4057.12
F8	9	30842.2	5238.03	19503.5	96948.5	3213.86
F9	9	30575.3	4935.64	18386.2	95998.3	3942.57
F10	9	29858.3	5032.44	18445.3	101092	3955.62
F11	9	31296.6	5698.49	18766.3	104919	3491.3
F12	9	46994.2	8414.84	18292.2	103324	4571.03
G1	9	37957.7	6234.04	17199.1	111222	3246.51
G2	9	46978.6	7628.33	19482.3	111806	3483.14
G3	9	34713.2	5605.51	19098	107683	2806.42
G4	9	31506.8	4846.21	19013.5	106527	2549.13
G5	9	30010	4416.48	19624	104584	2371.28
G6	9	31064	4839.84	20151.9	104319	2585.65
G7	9	28710.7	4838.62	18096.4	94283.4	2521.73
G8	9	32645.9	5802.68	19753.2	105020	3792.61
G9	9	45191.5	5836.12	19330.9	105441	3406.79
G10	9	37739.9	6578.62	18807.7	102788	2815.95
G11	9	60651.8	10285.2	21231.8	112115	8684.51
G12	9	41418.9	6795.75	18641.8	119602	3313.68
H1	9	49916.3	8069.3	18456.6	116124	6988.81
H2	9	38121.8	6460.39	17772.4	112367	3555.08
H3	9	32516.8	6108.66	19518.1	111304	4635.78
H4	9	30980.2	5611.73	18555.5	104745	2703.89
H5	9	31955.2	5718.53	19294.4	105801	3120.48
H6	9	38668.1	6905.69	26847.6	147092	4658.94
H7	9	28608.9	6546.63	4140.27	5247.4	2882.92
H8	9	26507.6	4319.74	2810.93	4911.93	2494.03
H9	9	30618.9	4712.49	3320.02	7071.55	4466.81
H10	9	37345.5	8458.21	6038.26	7600.55	4150.22
H11	9	40424.2	6851.74	4807.18	7072.16	3781.92
H12	9	40807.9	4961.12	3237	5235.2	2672.86
A1	10	15577.8	2829.96	9632.6	67809.6	2557.36
A2	10	29753.5	4109.96	14087.8	92775.1	2477.31
A3	10	27854.6	4243.31	15373.5	93031	2316.84
A4	10	29810.3	4422.6	15284.6	86977.3	2583.54
A5	10	30476.2	4488.36	16164	91367.4	2537.16
A6	10	40574.7	6196.8	17689.7	93118	3850.13
A7	10	31889.9	4868.16	16627.8	88408.9	3253.78
A8	10	150929	21005.7	54957.9	288541	14464.1
A9	10	34503.2	5016.42	16591.4	95501.2	2616.72
A10	10	28993.3	4554.3	15066.9	90525	2813.79
A11	10	28260.1	4104.41	14787.5	95996.9	2649.43
A12	10	31519.8	5081.45	13562.1	91855.4	3499.22
B1	10	28903.3	4592.09	13745.8	92469.4	3090.75
B2	10	32524	4788.04	16069.7	97916	2172.35
B3	10	28849.9	4447.64	16791.2	96768.3	2200.64
B4	10	28836.8	3869.06	16657.6	93571.5	2645.29
B5	10	32036.1	4686.91	19510.7	108022	2932.35
B6	10	25377.5	3678.69	17668.7	93767.6	1483.27
B7	10	26629	4040.31	17609.8	93142.5	1992.76
B8	10	95351.2	13092.5	53967.6	294999	6701.18
B9	10	34479.6	5348.98	17552.1	94416.9	1979.28
B10	10	34435	5135.7	16697.1	94165	2279.65
B11	10	41008	5985.11	16880	100076	3733.11
B12	10	51745.8	8649.54	17213.2	101842	5113.57
C1	10	33364	5321.63	16648.6	98845.6	2925.92
C2	10	39636.3	6118.04	22273.3	134831	4599.96
C3	10	27452.8	4536.75	17648	98253.6	2622.33
C4	10	28793.5	4271.73	16959.9	91030.9	2311.79
C5	10	29428.5	4365.83	18736.7	96014.2	2318.05
C6	10	27585.4	4320.97	18835.5	94281.8	1681.4
C7	10	27583.3	4178.6	18971.9	95694.6	1580.61
C8	10	29280.5	4232.33	18021.4	91762.6	2164.34
C9	10	38389.7	6885.03	18757.9	92637.1	3313.33
C10	10	31116.1	4794.53	16922.7	93932.6	2130.2
C11	10	32115.7	5485.23	16648.7	94667.5	2275.1
C12	10	37765.2	5765.44	16252.5	101630	2673.17
D1	10	39772.6	5941.65	16783.4	101414	2912.28
D2	10	30918	4961.45	18021.6	104752	2693.02
D3	10	51326.7	9220.32	22266.1	108991	6234.72
D4	10	34511	5499.27	18869	96998.4	3667.1
D5	10	34476.4	5049.21	19835.4	101677	2603.33
D6	10	40612.6	6600.41	20780.4	98357.4	4069.62
D7	10	27346	4163.58	18407.6	93126.1	1780.24
D8	10	28621.1	5392.92	19031.7	95662.8	2067.96
D9	10	34660.3	4862.22	17902.8	95630.4	2683.94
D10	10	38005.7	6225.93	18466.4	96979.2	3114.7
D11	10	39849.6	6586.85	18902.5	105370	2354.1
D12	10	110184	13350.9	20762.2	107944	4470.67
E1	10	42438.9	5891.22	17022.9	102110	3827.29
E2	10	35217.8	5479.13	17137.3	97296	3079.74
E3	10	48417.6	6594.55	19985.9	105395	4707.7
E4	10	32654.2	5522.86	19807.4	101336	2794.59
E5	10	31295.7	4935.24	19229	96817.7	2579.72
E6	10	115042	18469.7	27690.3	107307	9163.63
E7	10	33447.5	5895.31	19921.7	94797.9	3933.51
E8	10	32244	5774	19572.9	93054.9	4115.19
E9	10	31670.4	5452.61	19119.7	94226	2223.6
E10	10	32144.6	4888.11	17942.3	96763.8	2960.92
E11	10	36957.9	6302.15	18046	101041	4693.12
E12	10	43727.3	6949.05	17575.4	104327	3843.38
F1	10	39788.9	6666.58	17892.7	106313	7331.15
F2	10	35432.6	5668.84	17666.1	101885	2826.66
F3	10	32170.1	5389.39	19461.2	108787	3093.07
F4	10	31574.5	5010.95	20065.5	104714	2795.05
F5	10	33681.7	5294.18	20650.6	107384	2586.17
F6	10	45331.2	7768.18	22804.7	105604	4251.97
F7	10	27653.4	5045.3	20168.2	100712	4172.54
F8	10	30762.1	4956.42	19446.2	96877.5	3396.11
F9	10	30726.7	5065.99	18281.9	95973.6	4063.38
F10	10	29858.3	4918.54	18304	101092	4086.66
F11	10	31575.8	5861.48	18608.9	104726	3129.14
F12	10	46926.4	8134.29	18329.1	103246	4580.96
G1	10	37839.3	5990.25	17532.5	111348	3540.36
G2	10	46563.7	7616.5	19407.2	111623	3304.82
G3	10	34812	5853.61	19117.4	107507	2749.74
G4	10	31383.2	5039.05	18925.2	106297	2496.04
G5	10	29874.2	4531.07	19563.3	104673	2247.43
G6	10	30882.2	5022.77	20151.9	104471	2506.73
G7	10	28778.6	4754.93	17986.8	94261.4	2729.58
G8	10	32694.2	6014.78	19838.1	104748	3511.11
G9	10	45429.6	5853.26	19230.3	105274	3318.31
G10	10	38221.9	6858.93	18729.8	102608	2932.25
G11	10	60686.5	10414.7	21145.8	112442	8891.54
G12	10	41274.4	6663.5	18543.9	119444	2977.17
H1	10	49956.8	8049.72	18445.6	115319	7331.36
H2	10	38121.8	6262.84	17818	112993	3742.98
H3	10	32703.4	5969.33	19495.6	111257	4554.96
H4	10	30775.2	5453.4	18576.2	104834	2549.62
H5	10	32072	5572.27	19398	105466	2831.47
H6	10	38815.7	6725.06	26865.6	146986	4536.57
H7	10	28596.2	6595.4	4102.93	5274.56	2751.95
H8	10	26246.5	4338.62	2797.73	4917.57	2500.46
H9	10	31052.1	4661.67	3370.89	7250.04	4374.94
H10	10	37287.6	8351.43	6203.38	7269.09	4054.61
H11	10	39974.2	7032.23	4767.77	7174.64	4099.99
H12	10	40348.5	5443.76	3226.13	5344.27	2929.84
A1	11	15746.9	2697.67	9599.59	67076.5	2049.93
A2	11	30195.9	4296.19	14127.7	92914.3	2528.51
A3	11	27942.6	4102.63	15363.9	92871.4	2198.06
A4	11	29794.9	4320.05	15352	87095.8	2395.61
A5	11	30240.5	4628.36	16212.7	91161.6	2598.06
A6	11	40756.3	6236.4	17868.1	93020.4	3844.9
A7	11	31800	4851.79	16677.7	88523.7	3154.58
A8	11	149535	21048.4	54858.8	287129	12940.7
A9	11	34520.5	4800.83	16597.5	95701.5	2806.59
A10	11	29607	4578.16	15136.3	90486.6	2945.3
A11	11	28035.4	4058.91	14743.5	95452.4	2953.75
A12	11	31806.1	4947.53	13405	91718.2	3204.9
B1	11	29249.9	4005.87	13987.9	92415.4	2837
B2	11	33107.9	4590.28	15766.7	98320.3	2158.02
B3	11	28648.7	4198.49	16768.5	96753.3	2232.5
B4	11	28444.7	3978.96	16868.6	93742.5	2449.02
B5	11	31747.7	4420.78	19293	108061	2761
B6	11	25081	3593.77	17415.6	93875.4	1594.79
B7	11	27077.2	3820.9	17582.6	93376.2	1774.4
B8	11	94915.4	12507.1	53976	295902	6563.73
B9	11	34135.7	5545.26	17678.4	94560.8	2208.62
B10	11	34514.1	5193.97	16874.9	94064.2	2133.53
B11	11	41162.8	5901.06	16971.9	99933.4	3219.28
B12	11	52474.5	8557.39	17037.7	102139	5362.36
C1	11	33196.2	5327.76	16658.9	98956.2	3145.72
C2	11	40046.3	5646.64	22405.3	134319	4365.2
C3	11	26999.8	4313.56	17608.5	98744.9	2307.33
C4	11	28747	4397.81	17023.1	91541	2398.17
C5	11	29565.4	4256.14	18822.4	96348.3	2779.45
C6	11	27413	4074.27	18771.7	94637.2	1852.47
C7	11	27712.1	4381.06	18868.4	95936.4	1710.06
C8	11	29294.2	4146.63	18187.4	91982	2133.78
C9	11	38128.2	6838.94	18910.8	92604.2	2816.46
C10	11	30924.3	4922.74	17077.6	94358.3	2386.78
C11	11	32207.6	5587.98	16537.6	94441.7	2088.46
C12	11	37520	5755.93	16130.3	101217	2781.04
D1	11	39981.2	5958.5	16881.3	101383	3078.66
D2	11	31074.5	4719.54	17937.6	104585	2693.02
D3	11	51365.3	8766.2	22335.9	109303	5916.61
D4	11	34267.6	5259.95	18966.5	96984.7	3885.98
D5	11	34613.6	4859.3	19901	101504	2334.71
D6	11	40177.1	6509.7	20594.8	98624.3	3760.28
D7	11	26943.8	4130.77	18486.1	93423.6	1695.51
D8	11	28976.6	5391.15	18920.8	95568.8	2161.19
D9	11	34476.3	4926.75	17901	95618	2990.97
D10	11	38323.8	6470.7	18551.7	96734.4	3376.92
D11	11	39785.1	6296.55	18882.9	104729	2945.23
D12	11	110657	13619.1	20871	107904	4650.53
E1	11	42488.1	6202.49	16960.7	102221	4020.28
E2	11	34759.7	5762.94	17141.5	97574.3	2925.39
E3	11	48122.5	6580.6	20152	105092	4495.98
E4	11	32568.5	5233.78	19566.3	101339	2761.72
E5	11	31278.7	4694.63	19169.1	96997.6	2553.24
E6	11	115310	18491.3	27700.3	107200	9128.8
E7	11	33627.6	5600.63	19768.2	95270.3	4271.47
E8	11	32493.5	5665.7	19647.4	93096.8	3964.52
E9	11	31502.5	5235.03	18916.5	94544.5	2183.39
E10	11	31976	5117.32	17886.4	96639.2	2992.13
E11	11	36902.1	6349.36	18201.9	101048	4895.76
E12	11	44130.7	6973.29	17596.6	104218	3990.95
F1	11	40145	7191.16	17871.8	106871	7398.77
F2	11	35484.8	5808.31	17625.7	101979	3058.64
F3	11	31902.2	5456.49	19553.3	108696	3121
F4	11	31451.6	4927.17	19991.4	104659	2692.43
F5	11	33788.8	5334.67	20755.4	107472	2380.97
F6	11	45273	7866.42	22716.7	105772	4149.14
F7	11	27696.5	4965.02	20446.3	100704	4133.79
F8	11	30747.5	5231.77	19491.4	96771.3	3211.38
F9	11	30626.5	5109.44	18331.6	96449.4	4368.81
F10	11	30052	4854.8	18315.1	101189	4011.53
F11	11	31691.7	5721.63	18660.4	104697	3421.66
F12	11	46825.6	8033.05	18392.1	103234	4477.52
G1	11	38131.7	6133.99	17488.4	111076	3540.36
G2	11	46854.6	7603.49	19247	111477	3722.71
G3	11	34750.9	5686.39	19144	107822	2916.23
G4	11	31617.2	4902.69	19072.9	106554	2620.19
G5	11	30120	4594.57	19570.3	104881	2337.36
G6	11	30760.3	5080.39	20142.4	104381	2419.62
G7	11	28795.6	4733.81	18052.7	94476.8	2635.46
G8	11	32794.8	5955	19946.3	104715	3788.37
G9	11	45233	5799.27	19260.4	105593	3292.03
G10	11	37684.6	6830.27	18748.6	102881	3000.02
G11	11	60955.3	10400.1	21305.9	112565	8553.75
G12	11	41612.8	6650.15	18547.3	119155	3511.01
H1	11	50473.4	7688.43	18358.9	115486	7256.96
H2	11	37876.2	6410.68	17979.4	112774	3911.28
H3	11	32522.2	6152.2	19473	111144	4034.81
H4	11	31030.5	5660.38	18549.1	104699	2834.62
H5	11	31938.8	5465.21	19369.1	105488	3113.72
H6	11	38888.4	6770.79	26866.3	146893	4578.64
H7	11	28515.3	6607.19	4100.6	5268.35	2738.45
H8	11	26368.3	4182	2817.18	4847.83	2691.98
H9	11	31037.4	4721.26	3299.32	7102.17	4216.56
H10	11	37544.6	8416.91	6199.47	7487.39	4097.43
H11	11	40506.2	6835.64	4681.3	6812.02	4132.7
H12	11	40715.4	5445.24	3198.98	5637.47	3265.89
A1	12	15457.5	2798.14	9536.72	67325	2299.32
A2	12	30133.8	3909.16	14095.5	92837.1	2453.78
A3	12	27721	4327.16	15353	93199.9	2245.57
A4	12	30346.6	4600.06	15063.3	86705.3	2582.49
A5	12	30074.8	4686.01	16286.2	91418.9	2782.72
A6	12	40524.1	6287.47	17811.2	93252.4	3930.69
A7	12	31807.4	5019.29	16679.7	88666.7	2909.89
A8	12	149391	20849.2	55191	287790	13826.5
A9	12	34254.5	4732.7	16715.6	95777.7	2686.93
A10	12	29225.4	4387.31	15186.7	90569	2992.83
A11	12	28029.7	4007.43	14683.4	95694.5	2417.12
A12	12	31716.8	5042.76	13424.4	91994.1	2832.36
B1	12	28997.6	4340.85	13827.7	92404.6	2639.07
B2	12	32386.3	4628.94	15864.4	98334.3	2085.04
B3	12	28789.7	4221.49	16854.3	96807	2324.54
B4	12	28610.9	3957.43	16651.9	93496.8	2474.91
B5	12	31921.6	4422.93	19444.8	108391	2940.8
B6	12	25306.4	3690.43	17535.6	93796.4	1385.35
B7	12	26741.2	3865.48	17725.7	93471.5	1891.57
B8	12	94435.5	12782.3	53534.1	295484	7709.1
B9	12	34286.1	5229.38	17827.1	94844.7	2528.21
B10	12	34191.2	5106.07	16766.6	94166	2289.52
B11	12	41127	5836.85	16977.7	99724.2	3332.44
B12	12	52433.9	8426.35	17238.1	102014	5407.34
C1	12	33752.1	5624.71	16632.4	99089.6	2327.05
C2	12	39466.5	5978.49	22229.3	134513	3970.53
C3	12	26771.5	4153.97	17657.3	98904.1	2465.96
C4	12	28632.7	4107.93	16962.1	91469.5	2549.34
C5	12	29577	4116.8	18841	96365.7	2510.63
C6	12	27287.1	4248.71	18662.6	94668.4	1758.3
C7	12	27546.2	4185.75	18961.9	95845.3	1856.82
C8	12	29504	4335.35	18049.5	92028.9	2510.38
C9	12	38101.9	6824.16	18927.1	92743.1	3133.3
C10	12	30760.2	4903.16	16940.7	94292.7	2448.44
C11	12	32211	5469.92	16706.5	94832.4	2046.49
C12	12	38226.1	5603.9	16120	100926	3009.83
D1	12	39700.9	6122.88	16917.3	101780	2895.93
D2	12	31313.4	4755.25	18014.9	104771	2610.95
D3	12	51460.9	9166.58	22225.9	109386	5952.42
D4	12	34202.1	5323.36	19067.2	97102.5	3739
D5	12	34408.7	5167.31	19920	101771	2249.83
D6	12	40502.1	7018.55	20704.6	98751.4	3924.96
D7	12	27004.8	3873.46	18588.4	93483.2	2164.72
D8	12	29334.7	5745.78	19049.4	95558.7	2207.81
D9	12	34480	5191.08	17831.4	95693.8	2314.73
D10	12	37974.2	6534.46	18413.7	97356.5	3452.39
D11	12	39925.8	6549.53	18915.9	105172	2452.1
D12	12	110796	13556.7	20943.8	107881	4828.4
E1	12	42760.8	6197.9	17020.7	102092	4081.11
E2	12	34984	5762.94	17053	97556.6	3059.93
E3	12	48043.1	6553.65	20188.3	105319	4466.81
E4	12	32543.2	5142.16	19915.6	101617	2500.67
E5	12	31266.5	4859.17	19323.9	97255.6	2611.87
E6	12	115004	18741.8	27754	107296	9055.46
E7	12	33447.5	5690.82	19935.8	94851.1	4069.83
E8	12	32331.3	5532.13	19530.5	93026	3817.69
E9	12	31815.9	5248.25	19093.4	94486.9	2313.36
E10	12	31841.4	5202.61	17889.1	96962.5	2944.39
E11	12	36773	6299.26	18130.2	101012	4604.23
E12	12	44003.1	7051.04	17634.8	104494	3942.86
F1	12	39944.7	6882.42	17869.2	106433	7204.84
F2	12	35435.7	5799.92	17737.8	102138	2822.57
F3	12	31914.4	5297.24	19605.6	109149	2735.38
F4	12	31659.3	4724.42	19917.2	105189	2471.54
F5	12	33760.9	5276.37	20896.8	107310	2221.56
F6	12	45545.9	7610.25	22700.3	105811	4416.18
F7	12	27726.8	5065.57	20490.7	100850	3949.12
F8	12	30602.8	5095.66	19549.5	97269.2	3248.49
F9	12	30589.6	4880.92	18200	96250.7	3754.54
F10	12	30086.4	4869.25	18450.5	101161	3856.04
F11	12	31486.9	5413.77	18798.9	105211	3556.97
F12	12	46991.5	8142.01	18264.4	103143	4412.15
G1	12	37970.9	6370.72	17516.9	111585	3906.38
G2	12	46778.3	7906.3	19374	111537	3564.09
G3	12	34618.8	5585.52	19252.7	107903	3076.52
G4	12	31526.4	4905.92	19031.1	106394	2554.84
G5	12	29974.6	4387.83	19587.4	105023	2626.08
G6	12	30910.8	4759.17	20214.2	104263	2250.62
G7	12	28637.1	4675	17973	94587.1	2637.81
G8	12	32832.4	5879.66	19779.9	104969	3425.47
G9	12	45140.6	5770.13	19342.1	105525	3239.47
G10	12	38138.5	6936.84	18747.7	102550	2852.58
G11	12	60697	10235.7	21328.8	112812	8603.88
G12	12	41447	6460.88	18512	119452	3069.57
H1	12	50190	8104.89	18362.1	115187	7030.66
H2	12	38080.2	6673.23	18013.3	112816	3694.56
H3	12	32491	6365.55	19460.7	111567	4421.29
H4	12	31058	5797.28	18597	104915	2424.57
H5	12	32327.7	5527.03	19389.9	105726	2837.48
H6	12	38868.2	6847.77	26886.6	146902	4461.63
H7	12	28344.6	6541.13	4068.7	5235.77	2847.2
H8	12	26406.8	4239.33	2807.46	4858.4	2757.73
H9	12	31020	4645.02	3314.84	6914.93	4431.81
H10	12	37197.1	8359.49	6067.57	7600.55	4261.77
H11	12	40063.5	6893.12	4782	6878.46	3894.71
H12	12	40517	5344.57	3386.35	5425	2842.3
A1	13	15515.8	2982.34	9813.37	67345.2	2416.09
A2	13	30226.1	4417.64	14271.7	93106.5	2204.66
A3	13	27984.9	4061.42	15305.1	93393.2	1960.5
A4	13	30226.3	4424.91	15072.4	87198.5	2791.54
A5	13	30077	4586.16	16427.1	91267.6	2453.67
A6	13	40351.3	6301.02	17806.9	92740.7	3859.54
A7	13	31831	4804.62	16544.5	88477.9	2855.09
A8	13	149458	20991.5	55024.9	288309	13694.7
A9	13	34591.9	4862.86	16634.2	95888.5	2480.25
A10	13	29491.6	4595.2	15322.1	90291.1	2920.99
A11	13	28214.3	4125.96	14867.3	95274	2713.31
A12	13	31704	5245.13	13583	91495.7	3712.5
B1	13	28574.2	4003.87	14013.3	92705	3002.79
B2	13	33103	4370.2	16004.5	98419.6	2197.11
B3	13	28533.7	4153.77	17029.8	96774.5	2095.63
B4	13	28719.8	3831.67	16628.9	94230.5	2658.23
B5	13	31883.1	4539.3	19563.7	108422	2641.53
B6	13	25505.9	3597.38	17620.9	94067.9	1346.37
B7	13	26749.4	3957.27	17507.4	93342.1	1817.89
B8	13	95142.1	12269.8	54046.4	295605	7550.28
B9	13	34335	5290.55	17840.2	94759.7	2438.87
B10	13	34427.5	5223.6	16730.9	94169	2511.66
B11	13	41260	6065.65	17193.7	99336.2	3578.38
B12	13	51830.2	8782.01	17177.3	102276	5566.18
C1	13	34060.2	5435.74	16605.9	99202.5	2777.88
C2	13	39123.3	5704.5	22254.7	135051	4290.35
C3	13	26947.7	4450.02	17670	98538.5	2147.59
C4	13	28611.6	4090.68	17125	91570.7	2739.38
C5	13	29535.5	4099.02	18834.8	96191	2598.9
C6	13	27179.7	4291.9	18818.9	94277.4	2153.16
C7	13	27557	4391.38	19038.7	95919.8	1767.78
C8	13	29417	4176.06	18095.7	92048.8	2234.44
C9	13	38196.1	6906.78	18922.5	92918.5	3145.91
C10	13	30928.3	5026.47	17032.7	94264.5	2368.88
C11	13	32271.2	5609.84	16636.7	94821.3	2099.5
C12	13	37751.1	5569.45	16173	101142	2777.49
D1	13	39759.4	6000.65	16911.3	101960	2878.61
D2	13	30907.5	4864.69	18040.7	104929	2587.97
D3	13	51205.8	8946.37	22389.8	109468	6165.2
D4	13	34590.9	5434.84	19154.1	96938.4	3901.84
D5	13	34472	5154.09	20066.3	101682	2196.9
D6	13	40277.2	6742.09	20814.3	98641.6	3645.64
D7	13	27318.7	4035.79	18544.5	93442.6	1653.6
D8	13	29232.5	5635.24	19163	95374.4	1949.55
D9	13	34708	5117.71	18074.5	95673.9	2871.41
D10	13	38096.6	6638.56	18653.2	97300.8	3187.27
D11	13	39958.6	6531.9	18908.6	105296	2396.85
D12	13	111758	13616.2	20932.4	108078	4380.24
E1	13	42904.9	6174.93	16996.7	102462	4019.23
E2	13	34911	5912.43	17278.6	97644.1	2919.13
E3	13	48201.8	6371.48	20110.9	105393	4569.37
E4	13	32463.3	5226.66	20074.2	101609	2544.8
E5	13	31331.3	4730.02	19383.8	97163	2540
E6	13	115007	18674.4	27765.8	107303	9143.46
E7	13	33797.9	5730.11	19906.6	94897.8	4102.02
E8	13	32738.1	5836.27	19625.7	93199.1	4019.22
E9	13	31829.2	5330.17	19025.4	94476.1	2582.66
E10	13	31988.2	4867.67	18009.1	96823.4	3042.63
E11	13	36625.3	6257.82	18183.8	101499	5022.89
E12	13	44050.5	7052.71	17568.1	104285	3824.31
F1	13	40106.5	7248.34	18034	106489	7704.98
F2	13	35771.1	5519.94	17825.7	102389	2952.36
F3	13	31684.7	5182.73	19702.2	108696	2689.43
F4	13	31585.6	5454.99	20034	104836	2873.32
F5	13	33877.1	5433.46	20811.1	107512	2341.12
F6	13	45289.7	7802.95	22701.1	105944	4406.62
F7	13	27809.5	4794.32	20348.8	100803	4059.59
F8	13	30818.7	4983.8	19563.3	97026.7	3246.84
F9	13	30607.7	4967.82	18452.4	96205.3	3902.58
F10	13	30158.5	4864.15	18274.8	101181	3799.25
F11	13	31475.5	5574.75	18737.6	104805	3176.9
F12	13	47259.9	8195.21	18278.3	103108	4242.52
G1	13	38051.3	6108.62	17450.7	111527	3206.56
G2	13	46905.9	7714.68	19381.8	111781	3500.64
G3	13	35202.1	5770	19189	107937	2852.47
G4	13	31189.8	4920.44	19174	106705	2454.38
G5	13	30272	4560.5	19698.7	104609	2573.23
G6	13	30932.8	4932.03	20241.4	104466	2557.36
G7	13	28588.9	4724.76	18137.7	94428	2538.98
G8	13	32727.3	5764.19	20057.8	105198	3640.84
G9	13	45429.6	5825.83	19238	105594	3289.4
G10	13	38073.5	6809.67	18768.3	102885	2565.95
G11	13	60928.7	10426	21399.5	112555	8875.2
G12	13	41372.1	6758.14	18496.1	119329	3163.11
H1	13	50278.7	8062.18	18445.6	115773	7353.06
H2	13	37853.3	6459.12	17943.2	112699	3645
H3	13	32578.3	5959.54	19513	111347	4051.39
H4	13	30850.5	5554	18706.3	104916	2561.8
H5	13	32040	5475.01	19418.7	105787	2882.52
H6	13	38900.4	6831.76	27030.7	147056	4668.88
H7	13	28564	6762.92	4241.41	5327.32	2692.42
H8	13	26505.5	4314.15	2728.29	4917.57	2449.01
H9	13	30941.2	4826.41	3259.65	6977.05	4583.18
H10	13	37633	8697.98	5964.98	7392.26	4036.68
H11	13	40661.8	6973.6	4768.87	6957.29	3840.57
H12	13	40583.1	5106.21	3273.66	5524.16	2987.73
A1	14	15914.1	3045.97	9624.74	67208.5	2130.66
A2	14	30231.7	4307.52	14046.5	92808.4	2276.63
A3	14	27804.1	4479.21	15240.8	93406.8	1820.47
A4	14	29573.5	4412.23	15225.3	87559.6	2335.43
A5	14	30020.6	4497.62	16391.9	91521.8	2455.63
A6	14	40683.7	6220.77	17877.8	93024.8	3699.47
A7	14	31732.5	5035.66	16737.4	88609.3	2996.81
A8	14	149676	20795.1	54911.2	288303	12965.2
A9	14	34649.5	4860.83	16785.8	95670	2720.56
A10	14	29262.1	4644.05	15177.7	90378.1	2652.43
A11	14	28514.9	4287.6	14742.4	95146.5	2453.13
A12	14	31621.9	4450.55	13546.8	91361.4	2846.58
B1	14	29155.6	4133.48	14018.8	92192.4	3288.68
B2	14	32875	4581.35	15962.1	98366.5	1927.36
B3	14	29140.1	4232.99	16989.4	97159.7	2206.54
B4	14	28613.3	3840.73	16778	93854.6	2236.58
B5	14	32183.6	4308.72	19408.3	108099	2944.42
B6	14	25467.1	3664.23	17654.7	94152.5	1589.35
B7	14	26720.4	3946.78	17633.3	93423	1594.21
B8	14	95380.6	12660.9	54547.4	295698	7125.73
B9	14	34527.5	5294.2	17886	94659.8	2500.58
B10	14	34398.6	5116.94	16841.1	94479.4	2352.7
B11	14	41704	6105.34	17076.5	99876.2	3581.85
B12	14	52739.1	8774.81	17345.9	101747	5689.87
C1	14	33777.2	5639.43	16711.9	99107.9	2699.38
C2	14	39553.9	6080.6	22266.5	134710	3907.59
C3	14	26735.6	4225.67	17714.1	99004.4	2652.7
C4	14	28782.9	4092.84	17038.6	91503.6	2518.02
C5	14	29713.9	4188.94	18796.6	96174.6	2639.02
C6	14	27236.6	4274.46	18715.8	94503.7	1998.49
C7	14	27445.9	4311.19	19025.3	95946.3	1699.34
C8	14	29713.8	4340.54	18071.3	92050.6	2256.02
C9	14	38388	6872.86	18863.7	92644.4	3091.9
C10	14	30696	4941.33	17059.6	94035.5	2043.68
C11	14	32301.8	5632.8	16757.7	94939.7	2061.95
C12	14	37978.4	5719.11	16146.5	101517	2820.16
D1	14	39779.2	6169.24	16974.3	101766	2797.82
D2	14	31239.2	4947.63	18122.4	104660	2186.37
D3	14	51630.6	8991.68	22289.3	109391	6169.41
D4	14	34309	5561.66	19135	97302.5	4008.64
D5	14	34578.4	4973.62	20046.4	101875	2227.86
D6	14	40243.6	6595.23	20812.4	98650.7	3816.69
D7	14	27358.1	4080.69	18518.1	93456.1	1970.66
D8	14	29400.3	5653.81	19094.1	95608.4	2130.43
D9	14	34617.3	5031.07	17946.5	95940.8	2846.54
D10	14	38440.6	6505.39	18678.1	97048.3	3492.06
D11	14	39901.5	6516.35	18959.1	105231	2972.34
D12	14	111968	13797.5	21010	108426	4703.2
E1	14	42806.4	6117.5	17171.2	102252	4155.58
E2	14	34847.5	5962.26	17081.4	97578.5	2994.22
E3	14	48182.2	6857.59	20203.3	105230	4189.22
E4	14	32517.9	5135.04	19956.9	101800	2516.63
E5	14	31235.7	4858.28	19336.8	97120.3	2199.57
E6	14	114949	18620.9	27832.2	107220	9162.72
E7	14	34224.7	5552.41	19933	94921.2	3924.04
E8	14	32456.9	5698.19	19513.5	93194.4	3932.85
E9	14	31926.4	5245.6	18959.2	94450.9	2268.48
E10	14	32050.2	4955.63	18049.8	97207.2	2765.36
E11	14	36790.6	6503.55	18317.7	101804	4424.54
E12	14	44351.3	6968.28	17669.8	104145	3646.07
F1	14	39918	6942.45	18174	106469	7467.67
F2	14	35590.4	5875.42	17742.8	102337	3061.7
F3	14	32119.7	5456.49	19651.7	108560	2976.84
F4	14	31737.8	5077.14	20091.1	104934	2724.61
F5	14	33946.6	5290.95	20881	107397	2307.2
F6	14	45291.7	7836.95	22855.3	105672	4333.28
F7	14	27846.1	4939.3	20513.3	100600	4021.67
F8	14	30653.4	5186.4	19652.9	97188.7	3258.39
F9	14	30645.3	5127.95	18385.4	95971.1	4363.71
F10	14	29945.5	4993.34	18402.5	101015	3736.35
F11	14	31480.7	5548.59	18846.4	104894	3396.78
F12	14	47383.6	8202.93	18304.5	103166	4595.85
G1	14	37782.3	6263.63	17545.4	111783	3424.37
G2	14	46982.2	7939.42	19445.8	111786	2947.1
G3	14	35194	5614.6	19304.8	107799	3274.89
G4	14	31626.6	4853.47	19100.9	106530	2300.01
G5	14	30158.3	4442.81	19638.8	104689	2402.05
G6	14	30816.2	4856.4	20122.6	104741	2211.91
G7	14	28621.5	4762.47	18042.7	94383.1	2795.47
G8	14	32919.2	5938.62	19923.8	105214	3550.11
G9	14	45361.8	5932.96	19398.8	105889	3571.48
G10	14	37887.4	6846.39	18865.9	102810	2988.11
G11	14	60764.2	10543.1	21446.4	112773	8571.19
G12	14	41353.3	6482.72	18595.1	119340	3044.47
H1	14	49827.6	8446.6	18215.6	115718	6889.62
H2	14	37951.3	6530.49	18136.2	112779	3966.61
H3	14	32548.1	6062.95	19552	111327	4540.45
H4	14	30920.2	5836.03	18641.7	104792	2673.85
H5	14	32385.8	5625.8	19372.1	106014	3103.21
H6	14	39062.3	6975.04	27000.7	146956	4666.58
H7	14	28615.6	6530.91	4124.71	5244.3	2794.81
H8	14	26602.9	4212.76	2840.09	4973.92	2680.55
H9	14	31234.9	4857.95	3338.99	7082.92	4377.56
H10	14	37452.2	8448.14	6114.47	7676.66	3972.94
H11	14	40623.2	7011.53	4821.4	6968.55	4086.45
H12	14	40930.2	5270.54	3322.54	5728.12	3103.51
A1	15	15947.9	3050.99	9615.31	67380.9	2209.94
A2	15	31478	4260.56	14049.5	92425.5	2484.23
A3	15	28235.8	4159.47	15342	93428.4	2083.03
A4	15	30405.5	4330.42	15087.2	86818.2	2551.87
A5	15	30274.3	4617.04	16373.3	91052.5	2523.41
A6	15	40724.4	6384.39	17914.3	92947.8	3925.45
A7	15	32226.2	4961.53	16538.7	88568.4	3083.73
A8	15	150085	20100.7	54861.7	288938	12824.3
A9	15	34389.2	4764.22	16680	95210.5	2650.34
A10	15	29243.8	4516.82	15214.7	90287.8	2851.36
A11	15	28029.7	4068.49	14799.1	95186.6	2404.35
A12	15	32074.3	4935.63	13619.1	91518.8	3253.24
B1	15	28356.9	4271.06	13652.9	92303.9	3075.53
B2	15	32693	4304.78	15929.5	98675.6	2221.87
B3	15	29034.7	4307.09	16961.6	97113.4	2708.03
B4	15	28692.8	3624.34	16854.9	93858	2438.24
B5	15	32027.3	4338.89	19453.1	108588	3158.01
B6	15	25346.1	3737.41	17756.8	94492.7	1295.59
B7	15	27059	3896.08	17743.8	93540.7	1883.58
B8	15	95931.2	13019.6	54111.1	296725	6728.67
B9	15	34371.4	5357.2	17799.9	94867.1	2247.3
B10	15	34698.1	5275.95	16736.8	94320.7	2296.43
B11	15	41545.3	5979.27	16994.9	99996.5	3300.1
B12	15	52390.1	8695.62	17245	101668	5571.8
C1	15	33749.6	5524.09	16635.9	99342.8	2623.12
C2	15	39279.5	5682.38	22374.8	135319	4320.97
C3	15	27236.2	4244.17	17742	98932.9	2397.33
C4	15	28672.9	4149.95	16912.3	91661.9	2222.17
C5	15	29861.4	4393.5	18732.6	96436.2	2558.78
C6	15	27528.5	4235.42	18878.3	94803.7	1772.12
C7	15	27736	4268.32	19148.1	96000.1	1804.88
C8	15	29488.7	4274.75	18194.6	92125.5	2100.52
C9	15	38342.2	6756.33	18866.5	93009.9	3107.2
C10	15	30882.8	4880.65	17071.6	94410.7	2004.9
C11	15	32452.8	5597.82	16612.8	94536.9	2017.78
C12	15	38298	5593.21	16149.9	101218	2983.75
D1	15	39803.5	5931.11	16953.3	102193	2955.56
D2	15	31052.5	4750.64	17961.1	105294	2214.82
D3	15	51365.3	9060.16	22259.7	109404	5909.24
D4	15	34524.5	5641.43	19047.1	97571.8	3745.35
D5	15	34572.2	5169.2	20152.9	102024	1799.46
D6	15	40425.3	6701.49	20869.1	98664.3	3561.03
D7	15	27289.8	3930.45	18586.5	93721.9	1956.99
D8	15	28945.1	5409.72	19126.7	95404.8	1948.62
D9	15	34401.5	4897.58	18026.3	95759.1	2862.8
D10	15	38333.9	6496.02	18659	97295.1	3282.09
D11	15	39772.3	6565.08	19124	105754	2236.29
D12	15	111837	13811.2	21045	108097	4460.73
E1	15	43063.4	6171.48	17019.6	102253	3929.03
E2	15	35076	5530.04	17374.5	97772.3	3073.49
E3	15	48066.3	6595.48	20275.1	105401	4562.79
E4	15	32555.5	5209.76	20006.4	102113	2877.22
E5	15	31133.6	4780.44	19404.1	97237.5	2563.64
E6	15	114752	18411	27756.7	107597	9086.63
E7	15	34121.6	5572.06	20043.2	94882	4475.01
E8	15	33010.1	5946.37	19723.7	93357.2	4016.34
E9	15	32285.6	5342.5	19087.1	94785.5	2305.88
E10	15	32307	5000.94	18020.9	96893	3099.55
E11	15	37391.2	6306.96	18337.8	101507	4580.34
E12	15	44311.7	7181.44	17576.2	104616	3863.28
F1	15	40110.9	7388.41	18044.5	106605	7397.49
F2	15	35897.6	5787.33	17802.4	102063	2776.58
F3	15	32063.1	5195.25	19548	108548	2665.1
F4	15	31427.9	4957.33	20159.2	105100	2806.36
F5	15	34121.7	5210.78	20879.3	107535	2430.15
F6	15	45495.4	7710.75	22772.7	105927	4270.31
F7	15	27846.1	4876.16	20432.6	100836	3735.58
F8	15	30859.1	5105.05	19635.1	97350.6	3230.35
F9	15	30754.5	5255.88	18422.6	96525.3	4240.34
F10	15	29974.9	4809.75	18459.1	101246	3853.41
F11	15	31856.1	5826.27	18752.4	104761	3409.72
F12	15	47205.8	8305.02	18260.3	103010	4561.1
G1	15	38042.5	6191.76	17445.6	111425	3960.51
G2	15	47112.1	7517.14	19333.1	111901	3975.41
G3	15	34754.5	5777.27	19271.3	108132	3037.55
G4	15	31151.4	4769.55	19201.2	106627	2420.89
G5	15	30135.5	4683.61	19758.7	104929	2539.31
G6	15	30753	4960.83	20344.8	104787	2412.92
G7	15	28639.9	4606.38	18116.3	94731.7	2529.57
G8	15	33016.7	5979.56	19943.8	105117	3573.85
G9	15	45336.4	5702.42	19271.6	105877	3420.8
G10	15	37735.5	7022.81	18857	102749	2884.63
G11	15	60575.3	10346	21432.2	112218	8788.03
G12	15	41517.8	6547.02	18472.2	119230	2811.78
H1	15	49966.4	7800.56	18254.9	115691	7477.06
H2	15	37669.4	6338.04	17880	112817	3529.72
H3	15	32364.8	6072.74	19519.2	111326	4351.87
H4	15	30855.4	5534.21	18651.3	105008	2534.19
H5	15	32312.1	5516.48	19386.9	105823	3042.41
H6	15	39154.4	6889.68	27014.2	146635	4659.7
H7	15	28790.9	6762.13	4189.28	5367.67	2647.97
H8	15	26479.8	4334.43	2825.51	4759.78	2538.34
H9	15	30981.9	4596.83	3338.99	6997.18	4547.31
H10	15	37823	8530.75	6089.06	7703.69	4014.77
H11	15	40608.7	7162.13	4722.9	6962.92	3974.79
H12	15	40812.9	5280.91	3432.52	5653.05	3114.81
A1	16	16295.5	2890.24	9646.75	67088.9	2233.01
A2	16	31165.4	4440.31	14196.6	92926.4	2568.65
A3	16	28797.8	4519	15373.5	93374.3	2295.59
A4	16	30327.4	4351.16	15276.6	87333.9	2177.06
A5	16	30229.2	4535.71	16291.4	91214.1	2725.75
A6	16	41124	6301.02	17867	92998.7	3860.59
A7	16	31846	4956.72	16630.7	88514.9	3096.01
A8	16	150815	20914.7	54966.6	288065	12609.7
A9	16	34436.5	4671.68	16625	95396.5	2401.13
A10	16	29576.9	4687.22	15293	90259.5	2755.21
A11	16	27961	4199	14778.2	95196.1	2748.16
A12	16	31840.8	4928.19	13509.3	91468.3	3563.21
B1	16	28721.2	4113.54	14231.8	91924.3	2862.37
B2	16	32755.3	4673.55	16044.2	98698	2593.27
B3	16	28922.4	4236.82	17070.2	97103.4	2193.56
B4	16	28989	3856.6	16849.1	94125.2	2578.43
B5	16	32137.4	4417.54	19407.2	108360	2946.83
B6	16	25237.1	3477.23	17650	94155.2	1385.35
B7	16	26989.3	3903.07	17686.8	93398.7	1983.88
B8	16	96016.6	13203	54387	295014	6746.99
B9	16	34427.9	5231.21	17666.2	94957.7	2361.51
B10	16	34608.2	5353.97	16830.2	94344.7	2264.84
B11	16	41494.1	6327.15	17185.7	99734.7	3525.27
B12	16	52406.4	8856.89	17253.3	101850	5501.52
C1	16	33654.5	5483.6	16992.9	99478.5	2840.68
C2	16	39823.3	5588.78	22425.6	134950	4506.4
C3	16	27406.5	4306.62	17767.5	98853.3	2092.46
C4	16	28852.7	4185.52	16984.3	91502.5	2613.04
C5	16	29642.5	4214.63	18858.6	96342.2	2188.66
C6	16	27659.2	4049.36	18846.8	94723	1645.11
C7	16	27635.7	4284.99	19018.7	95818	1512.17
C8	16	29461.4	4240.12	18097.6	92095.7	2145.46
C9	16	38353.2	6865.03	19034.7	92751.3	3233.22
C10	16	31259.4	4892.4	17198.6	94304.8	2193.85
C11	16	32145.2	5698.38	16729.4	94748.3	2269.58
C12	16	38396.9	5482.75	16107.3	101298	2929.22
D1	16	39793.6	6348.36	16962.3	102160	2718
D2	16	31158	4855.47	18046.3	104820	2433.68
D3	16	51818.6	9098.09	22462.8	109268	6085.15
D4	16	34700.6	5569.84	18896.6	97238.3	3924.05
D5	16	34491.4	4934.88	20239.4	101758	2231.85
D6	16	40509.4	6837.99	20651.5	98798.7	3950.43
D7	16	27313.9	4139.41	18798.4	93447.1	1805.75
D8	16	29198.4	5325.71	19148.1	95608.4	2163.99
D9	16	34637.9	4993.06	18019.8	95912.4	2986.19
D10	16	38194.9	6346.91	18675.2	97356.5	3356.6
D11	16	39954.4	6625.22	19012.7	105248	2742.98
D12	16	112203	13893.1	20976.9	107930	4765.8
E1	16	42956.5	6296.68	17203.9	102665	4055.94
E2	16	35211.4	5702.28	17308.1	97740	2977.54
E3	16	48497.9	6648.46	20273.2	105716	4682.29
E4	16	32761.8	5261.35	19817.5	101810	2704.44
E5	16	31407.5	4688.44	19357.1	97451.9	2693.19
E6	16	114448	18438.7	27728.5	107261	9289.22
E7	16	34813.6	5686.36	19990.4	94807.3	4135.15
E8	16	33668.8	6076.32	19757.7	93142.3	4015.38
E9	16	32966.4	5512.51	19014.5	94460.8	2450.82
E10	16	32241.5	4852.57	18037.1	97074.5	2884.71
E11	16	37134.9	6429.35	18277.5	101108	4427.4
E12	16	44680.6	6959.92	17547.8	104465	3987.63
F1	16	40033.7	7042.51	18164.9	106974	7550.6
F2	16	35658.3	5842.91	17883.2	102285	3052.5
F3	16	32084.9	5166.62	19626.9	108967	2930.89
F4	16	31982	5071.28	20149	105057	2979.42
F5	16	33807.7	5435.89	20967.5	107462	2649.76
F6	16	45566.7	7811.26	22770.4	106063	4310.96
F7	16	28098.6	5062.45	20615.6	100943	3885.63
F8	16	30752.6	5113.65	19589.1	97235.7	2959.02
F9	16	30487.9	4921.96	18345.6	96328.2	3913.64
F10	16	30311.1	4899	18391.4	101318	3828.95
F11	16	31939.9	5835.32	18785.1	104755	3547.02
F12	16	47592.4	8428.57	18345.5	103084	4338.5
G1	16	37877.3	6345.36	17588.3	111885	3250.38
G2	16	47050.1	7895.66	19578.4	112137	3547.68
G3	16	35236.3	5651.86	19352.6	108223	2781.62
G4	16	31516.2	4852.66	19150.7	106531	2416.81
G5	16	30441.7	4486.94	19722.1	104973	2734.94
G6	16	30757	5029.97	20110.9	104858	2236.48
G7	16	28547.2	4710.44	18082.6	94343.6	2607.22
G8	16	32706.5	5932.07	19950.4	105272	3660.34
G9	16	45137.2	5916.67	19262.1	105860	3332.33
G10	16	38108.6	6611.76	18800.6	102802	3152.04
G11	16	60942.6	10384.3	21591.2	112678	8704.12
G12	16	40985.5	6811.52	18832	119560	3068.43
H1	16	49808.3	7483.76	18281.7	115421	6911.32
H2	16	38093.6	6666.86	17997	113136	3428.28
H3	16	32455.4	6007.43	19502.7	111505	4609.88
H4	16	30793.8	5594.41	18780.6	105145	2542.31
H5	16	32277.9	5752.46	19459.5	105719	2996.62
H6	16	39024.8	6839.38	27080.2	146894	4546.52
H7	16	28525.8	6643.37	4241.41	5195.42	2836.88
H8	16	26457.5	4145.64	2863.01	4926.02	2405.42
H9	16	31121.4	4785.22	3489.04	7019.92	4592.81
H10	16	37473.5	8491.46	6108.6	7448.34	3921.15
H11	16	40558.1	6865.53	4798.42	7132.97	3653.33
H12	16	41128.5	5306.08	3404	5417.92	2838.06
A1	17	16851.7	3010.8	9654.61	67266	2284.9
A2	17	32155.7	4542.33	14161.4	92837.1	2228.19
A3	17	29977.2	4077.05	15273.6	93628.5	2060.53
A4	17	30291.5	4408.78	15269.8	86707.6	2896.06
A5	17	30157.1	4630.42	16329.7	91513.6	2520.46
A6	17	40855.4	6240.57	17947.6	93203.7	3775.84
A7	17	31840.7	5167.54	16672.8	88419.6	2959.02
A8	17	150383	20211.7	54902.5	288282	13740.7
A9	17	34707.1	5059.13	16698.3	95672	2635.51
A10	17	29567.7	4448.65	15306.5	90671.8	3108.87
A11	17	28003.9	4179.84	14732	95337.8	2663.37
A12	17	31514.3	5075.5	13442.5	91357	2828.1
B1	17	29019.6	4145.44	13829.5	92706.8	2539.26
B2	17	32629	4532.28	16185.7	98586.1	2350.88
B3	17	28541.9	4317.31	17062.6	97203.4	2279.7
B4	17	28836.8	3849.8	16850.3	94307.5	2213.93
B5	17	32064.7	4749.4	19541.4	108443	3120.6
B6	17	25572.5	3489.87	17702.5	94215.7	1510.47
B7	17	27089.8	3949.4	17788.2	93411.3	1744.22
B8	17	95831.1	12660.9	54212.5	296179	6719.5
B9	17	34714.3	5273.21	17710.2	94888.6	2447.16
B10	17	34905.5	5244.34	16830.2	94194	2304.33
B11	17	41682.2	6454.39	17178.8	99712.5	3845.12
B12	17	52450.2	8974.96	17268.5	101814	5165.58
C1	17	34087.7	5527.77	16786.8	99257.3	3040.31
C2	17	39972.5	5559.85	22395.1	134914	4269.94
C3	17	27536.2	4616.55	17750.1	99177.4	2405.21
C4	17	29483.1	4083.14	17132.7	91369.5	2493.19
C5	17	29984.8	4349.03	18917.4	95998.9	2321.06
C6	17	28066.5	4320.97	18858.2	94722.2	1788.54
C7	17	27911.1	4412.02	19196.5	96332.1	1929.38
C8	17	29573.1	4318.9	18123	92273.6	1989.97
C9	17	38408.4	6905.04	18946.9	93243.9	2915.48
C10	17	31426.5	5021.58	17050.7	94478.3	1896.5
C11	17	32421	5429.48	16659.6	94862.2	2214.36
C12	17	38105.5	5732.18	16280.1	101106	3076.22
D1	17	39775.9	6332.56	16930.3	101922	2652.59
D2	17	31098.9	4870.44	17906.2	104896	2582.5
D3	17	51545.2	8993.79	22473.4	109364	5968.22
D4	17	34481.2	5541.21	19113.8	97439.2	3706.22
D5	17	34800.8	5114.4	20225.5	101713	2117.02
D6	17	40665.4	6708.4	20643.3	98710.6	3769.38
D7	17	27203.1	3960.67	18605.7	93491.4	1953.35
D8	17	29152.7	5603.4	19213.3	95678.5	2033.46
D9	17	34523.9	4895.81	18034.6	96053.4	2647.59
D10	17	38288.5	6414.43	18543	97265.3	3225
D11	17	40178.7	6558.86	19104.4	105338	2470.87
D12	17	112869	13838.5	21030.8	107786	4723.07
E1	17	42902.5	6239.25	17117.8	102703	4130.41
E2	17	35186	5858.27	17144.7	97422.1	2990.05
E3	17	48133.2	6857.59	20161.3	105430	4255.09
E4	17	32475.5	5358.31	19902.8	101972	2649.03
E5	17	31445.6	4768.05	19347	97267.5	2518.25
E6	17	114965	18645	27723.1	107524	9389.15
E7	17	35814.7	6124.8	20023.4	94904.4	3971.37
E8	17	34873.2	5999.61	19534.2	93402.8	3947.25
E9	17	34669	5688.68	19117	94423.9	2363.86
E10	17	32892.3	5056.91	17954.1	97060.9	3102.31
E11	17	37501.8	6324.31	18419.2	101670	4945.46
E12	17	44594.4	7073.61	17490.8	104007	3995.92
F1	17	40612.5	7072.52	18106	106450	7807.05
F2	17	35749.2	5976.09	17849.9	102175	3108.71
F3	17	32139.7	5244.46	19600.3	108730	2904.77
F4	17	31967.7	5220.41	20205.2	105182	2875.06
F5	17	34314.2	5480.43	20996.6	107551	2252.08
F6	17	45613.8	7609.5	22775.9	106168	4220.88
F7	17	27913	5042.96	20390.7	100760	4033.21
F8	17	30842.2	5155.9	19669.8	97294.8	3049.74
F9	17	30600.9	5086.91	18411	96258.1	4081.24
F10	17	30622.1	4944.89	18579.9	101351	3723.25
F11	17	32007.1	5722.64	18764.3	104817	3092.33
F12	17	47411	8292.15	18251.3	103027	4425.39
G1	17	37947.5	6352.4	17515.6	111501	3318.69
G2	17	47358.9	7708.76	19589.5	112045	3652.7
G3	17	35631.8	6005.38	19220.9	108169	3163.31
G4	17	31540.5	4842.98	19145.1	106583	2654.49
G5	17	30149.5	4717.68	19792.1	104794	2581.91
G6	17	30884.2	4785.1	20274.4	104533	2333.26
G7	17	28678.8	4813.74	18084.1	94547.5	2349.95
G8	17	32896.2	5932.07	19955.4	104961	3471.26
G9	17	45268.6	5736.7	19336	105955	3169.39
G10	17	37935.7	6950.27	18873.1	103018	3148.37
G11	17	60808.2	10628.7	21341.8	112626	8808.73
G12	17	41207.6	6612.54	18529.1	119253	3223.56
H1	17	49607.8	7820.13	18318	115183	6922.17
H2	17	37834.6	6531.76	18014.5	112862	3691.11
H3	17	32561	6239.28	19525.3	111336	4425.44
H4	17	31057.2	5479.79	18791.7	104744	2602.4
H5	17	32089.8	5435.81	19413.6	105821	3079.19
H6	17	39122.2	7029.92	27104.2	147107	4727.76
H7	17	28739.2	6698.42	4151.16	5354.48	2713.05
H8	17	26563.7	4174.31	2731.77	4923.21	2827.76
H9	17	31139.6	4778.21	3415.74	7192.29	4431.81
H10	17	37605.6	8594.21	6196.54	7624.58	4245.83
H11	17	40839.1	6946	4701.01	7236.58	4074.05
H12	17	40986.4	5163.95	3232.92	5225.28	2979.26
A1	18	18131.2	3339.01	9646.75	66610.5	2459.34
A2	18	34284.8	4741.52	14195.1	93012.7	2527.13
A3	18	31896.2	4803.22	15489.8	93840.7	1921.74
A4	18	30239.1	4144.9	15504.9	87245.9	2807.37
A5	18	30255.2	4699.39	16382.6	91475.5	2573.5
A6	18	40866.4	6208.27	17850.9	92987.9	3750.73
A7	18	31857.8	5052.99	16658.1	88806.8	2999.64
A8	18	150580	21065.5	55045.3	287677	12977.5
A9	18	34392.7	4876.08	16772.6	95787.9	2794.73
A10	18	29527	4801.96	15237	90653.8	2958.57
A11	18	28572.2	4081.66	14858.1	95354.4	2370.66
A12	18	31700.3	5063.6	13418.9	91140.4	3567.47
B1	18	29423.3	3938.07	14009.7	92165.4	2840.38
B2	18	32930.8	4620.02	16052.7	98433.6	2324.82
B3	18	28651.4	4106.5	17071.4	97104.6	2225.42
B4	18	29136.4	4300.72	16836.5	94275.8	2358.44
B5	18	32068	4614.72	19648.5	108559	2827.37
B6	18	25431.1	3435.67	17692.2	94170.1	1460.6
B7	18	27133.3	3973	17673.2	93256.7	2126.79
B8	18	97527	13176.1	53976	297313	6966.9
B9	18	35153.9	5192.87	17809.3	95013.8	2339.4
B10	18	35363.2	5529.77	16792.5	94176	2127.6
B11	18	42635.4	6131.03	16996.1	99612	3626.88
B12	18	53049	8949.04	17185.6	101252	5255.54
C1	18	34344.4	5525.32	16677.3	99331.4	2870.96
C2	18	40109.8	5713.01	22427.3	134797	4224
C3	18	27546.7	4484.71	17819.8	99347	2265.71
C4	18	29576.2	4130.56	17149.4	91957.6	2126.07
C5	18	30824.4	4298.63	18880.2	96409.7	2350.15
C6	18	28254.9	4209.67	18817.2	94816.7	1987.26
C7	18	28001.4	4519.21	19217.4	96137.5	1779.32
C8	18	29827.3	4275.61	18237.3	91784.2	2330.62
C9	18	38591	7108.54	19069	92985.2	2885.77
C10	18	31932.7	4941.33	16966.7	94380.5	2350.98
C11	18	32785.4	5638.26	16614.9	94707.3	1833.34
C12	18	39014.4	5969.73	16397.7	101221	2590.19
D1	18	39888.5	6345.2	17001.3	102001	3216.2
D2	18	31257.7	4643.51	18295	105333	2086.79
D3	18	51463.9	9130.76	22454.3	109505	6129.39
D4	18	34921.9	5333.59	19072.5	97526.6	3641.72
D5	18	34648.7	4981.18	20230.5	101837	2292.77
D6	18	40925.6	6792.2	20764	98764.2	3807.59
D7	18	27142.9	4169.63	18695.2	93637.8	1813.04
D8	18	29132.8	5587.48	19277.6	96025.9	1860.98
D9	18	34377.3	5025.77	17860.2	96061	2374.03
D10	18	38734.5	6482.89	18632.1	97394.9	3705.9
D11	18	40622.2	6522.57	19082.8	105486	2483.38
D12	18	113212	13817	20946.6	108039	4654.5
E1	18	42830.4	6521.81	17018.5	102481	3948.96
E2	18	35383.9	5639.45	17348.1	97676.4	3172.56
E3	18	48424.8	6580.6	20292.8	105596	4630.54
E4	18	32958.4	5355.64	20033.9	101941	2690.35
E5	18	31632.1	4748.59	19367.3	97313.8	2503.12
E6	18	114774	18242.6	27722.2	107351	9411.15
E7	18	37953.2	6234.63	20133.6	94869.8	4226.98
E8	18	37568.9	6374.14	19561.6	93341.4	4278.34
E9	18	37284.4	5868.38	19135.1	94838.6	2332.06
E10	18	32914.1	5040.03	18047.1	97181	2814.02
E11	18	38409.6	6712.65	18340.7	101709	4918.7
E12	18	45410.6	7235.78	17745.5	104325	4340.8
F1	18	40533.9	7032.5	18151.8	106459	7656.5
F2	18	36208.9	6261.31	17969.1	102464	3209.88
F3	18	32295.4	5534.32	19690.6	109201	2738.08
F4	18	32006.6	5050.33	20195	105485	2636.78
F5	18	34499.8	5296.61	20992.4	107576	2456.43
F6	18	45874.2	7749.29	22768.9	106040	4357.19
F7	18	28143.9	4875.38	20443.9	100815	3812.26
F8	18	31003.1	5144.16	19677.9	97208.6	3307.87
F9	18	30820.1	4868.85	18425.1	96113.8	3919.59
F10	18	30822.5	5099.58	18485.6	101285	4222.07
F11	18	32688.7	5638.13	18698	105196	3395.79
F12	18	48422.4	8352.21	18278.3	102885	4614.88
G1	18	38313	5993.07	17385.9	111468	3553.25
G2	18	47909.8	7877.91	19368.5	111699	3257.78
G3	18	35797.2	6021.74	19368.5	108218	2844.5
G4	18	31457.5	4908.34	19174.8	106744	2580.16
G5	18	30105.9	4701.42	19666.8	105005	2881.67
G6	18	30884.2	4830.48	20273.6	104745	2200
G7	18	28554.3	4754.17	18185.2	94764.5	2305.24
G8	18	32881.6	5891.12	20033.7	105252	3813.8
G9	18	45463.5	5766.7	19434.9	105890	3423.43
G10	18	38098.1	6745.19	18874	102704	2931.34
G11	18	61222.9	10833.7	21455.1	112632	9040.83
G12	18	41348	6727.8	18518.8	119483	3313.68
H1	18	49524.9	8247.27	18240.8	115110	7250.76
H2	18	37909.7	6264.12	17946.7	112970	4028.86
H3	18	32398.2	6285	19499.7	111123	4481.39
H4	18	30803.5	5575.45	18613	104972	2854.11
H5	18	32176.8	5747.18	19485.4	105803	3049.92
H6	18	39025.5	6856.91	27229.5	146975	4762.18
H7	18	28608.9	6677.19	4163.61	5172.14	2632.09
H8	18	26457.5	4383.37	2787.32	4822.47	2626.24
H9	18	31192.4	4863.21	3382.97	7236.04	4375.81
H10	18	37630	8476.35	6103.72	7725.72	4103.41
H11	18	40850	6906.92	4761.21	6861.57	4093.22
H12	18	41221.1	5380.1	3116.15	5287.61	3082.33
A1	19	19854.1	3697.36	9932.84	67228.7	2433.39
A2	19	38208	5504.24	14241.1	92932.5	2469
A3	19	35528.9	5019.22	15451.5	93259.4	2075.53
A4	19	30090.6	4347.7	15245.8	87287.6	2388.22
A5	19	30569.8	4688.07	16599.1	91411.7	2806.3
A6	19	41049.1	6566.78	17959.4	93049.7	3686.91
A7	19	31999.2	4998.12	16592.5	88729.9	3203.71
A8	19	151398	20758.1	55368.8	288130	13835.7
A9	19	34471	4671.68	16634.2	95357.9	2504.97
A10	19	29550.6	4699.71	15187.8	90797.2	2968.51
A11	19	28034	4292.39	14854.6	95249.2	2433.38
A12	19	31647.4	5187.1	13571.8	91461.1	3179.3
B1	19	29120.5	4167.38	13893.2	92210.3	2649.22
B2	19	33168.6	4627.45	15911.1	98626.7	2137.17
B3	19	28997.7	4121.83	17114.4	97269.7	2424.84
B4	19	28859	3704.78	16768.8	94402.7	2388.63
B5	19	32361.9	4649.2	19506	108172	3185.77
B6	19	25630.7	3676.88	17765.3	94271.5	1379.91
B7	19	27959.1	3745.72	17652.3	93525.4	1948.38
B8	19	99034.5	13087.1	54237.8	297195	7388.4
B9	19	35665.4	5262.25	17734.5	95043.6	2360.59
B10	19	36631.6	5521.87	16768.6	94165	2103.91
B11	19	43426.1	6438.05	17120.2	100018	3395.94
B12	19	54775.8	8653.86	17392.8	101850	5126.22
C1	19	34320.6	5357.21	16968.8	99283.5	2805.92
C2	19	40938.4	5968.28	22686.2	135285	4441.75
C3	19	28289.4	4438.46	17879	99132.4	2382.71
C4	19	30646.6	4548.68	17291.2	91502.5	2249.16
C5	19	31548.3	4292.7	18969	96320.8	2129.48
C6	19	29257.2	4232.1	18817.2	95312.5	2110.82
C7	19	28206.6	4311.99	19224.1	96260.9	1517.95
C8	19	30131.8	4381.23	18188.3	92143.6	2129.28
C9	19	38876.2	6846.77	18967.8	93348.9	3187.31
C10	19	32620.7	5141.96	17143.6	94216.1	2308.22
C11	19	33685.5	5806.6	16502.7	94478.2	1818.98
C12	19	39408.5	5752.37	16227.1	101173	2630.49
D1	19	39702	6177.67	16989.3	101971	3075.78
D2	19	31053.6	4799.02	18358.8	104915	2241.09
D3	19	51667.2	9270.89	22346.5	109266	5867.1
D4	19	35037.3	5268.13	19234.6	97080.4	4250.79
D5	19	35290.5	5136.13	20273.3	101695	2049.11
D6	19	41041.7	6763.69	20769.5	98690.6	3881.29
D7	19	27440.8	4072.92	18592.9	93614.3	1716.47
D8	19	29392.8	5576.87	19391.3	95645.3	1934.63
D9	19	34534.2	5058.48	18162.7	96109.2	2691.59
D10	19	38844.8	6633.87	18614.9	96918.7	3229.84
D11	19	41117.5	6571.3	18892.2	105502	2969.21
D12	19	113961	14202.2	21160.4	108049	4839.33
E1	19	43515	6201.35	17210.5	102624	3975.18
E2	19	35097.2	5715.28	17371.3	97945.3	2812.76
E3	19	48629.9	6694.93	20300.3	105886	4437.64
E4	19	32774.9	5320.06	20125.5	102079	2942.02
E5	19	31578.6	4807.86	19494.5	97376.5	2815.18
E6	19	114861	18332.4	27703.1	107772	9404.73
E7	19	42343	6612.35	19990.4	95179.8	4076.46
E8	19	42404.8	6892.16	19699.2	93230.7	3601.75
E9	19	42897.5	6540.49	19205.9	94651.5	2390.04
E10	19	33889	5165.3	18104.8	97152.1	2876.45
E11	19	39235.2	6719.4	18211.5	101621	4771.5
E12	19	46732.7	7207.35	17675.5	104355	3893.12
F1	19	40605.1	6676.59	18153.1	106843	7013.46
F2	19	36286.2	5935.19	17947.9	102570	3021.85
F3	19	32569.5	5497.64	19746.5	108898	3214.7
F4	19	32587.7	5072.11	20276.8	105175	2595.9
F5	19	35095.3	5534.68	21091.4	107683	2485.26
F6	19	46301.6	7938.21	22927.7	106159	4232.04
F7	19	28067.7	4936.18	20517.3	100618	3761.14
F8	19	31159.5	5206.74	19650.5	97569.3	2929.33
F9	19	31125.1	5020.93	18566.6	96272.1	4036.15
F10	19	31899.1	5119.98	18382.8	101199	3831.57
F11	19	33380.7	5950.02	18770.2	105358	3170.93
F12	19	48831.9	8445.73	18342.2	103059	4186.25
G1	19	39813.1	6541.23	17446.8	111828	3365.08
G2	19	48817.2	7955.98	19589.5	112091	3631.91
G3	19	36730.2	5766.37	19322.5	108270	2825.9
G4	19	31499.8	4781.65	19349.7	106713	2391.49
G5	19	30007.8	4521.01	19866.1	104923	2499.87
G6	19	30931.4	4971.64	20297.1	104712	2224.57
G7	19	28676	4648.61	18187.5	94480.6	2891.95
G8	19	32599.8	5750.27	20126	105086	3872.31
G9	19	45208.4	5959.52	19397.1	105970	3384.01
G10	19	38091.9	6696.83	18811.3	102788	2973.46
G11	19	61333	10478.9	21579.2	112902	8523.24
G12	19	41059.1	6786.04	18660	119348	2730.79
H1	19	50313.4	7748.94	18229.7	115265	7046.16
H2	19	37406.3	6253.92	17942	112893	3785.63
H3	19	32345.4	6029.2	19578.7	111190	4370.52
H4	19	31040.2	5615.03	18761.4	105056	2576.41
H5	19	32218.4	5548.14	19381.7	105777	2995.87
H6	19	39209.9	6979.61	27188.2	146644	4593.93
H7	19	28775.1	6682.7	4144.94	5311.8	2713.05
H8	19	26475.8	4292.47	2859.54	4928.84	2694.12
H9	19	31193.3	4934.19	3426.08	7246.54	4087.06
H10	19	37652.3	8305.09	6138.89	7835.88	4110.38
H11	19	40876.5	6829.89	4731.65	7274.86	4077.43
H12	19	41080.6	5396.39	3294.02	5997.25	3078.09
A1	20	23952	4266.7	9552.44	67245.8	2597.73
A2	20	45034.1	6174.66	14170.6	92579.8	2189.44
A3	20	41614.9	6055.18	15380.3	93771.8	1906.74
A4	20	30070.1	4350.01	15263	87180.4	2677.51
A5	20	30483	4597.48	16504.8	91279.9	2525.37
A6	20	40841.1	6358.34	18090.5	93462.8	3792.58
A7	20	32042	5042.4	16856.9	88041.1	2728.49
A8	20	151632	20866.3	54896.7	287457	12192.8
A9	20	34605.7	4962.52	16840.8	95617.1	2596.94
A10	20	29443.1	4440.7	15251.6	90518.2	2884.52
A11	20	28487.7	4348.67	14869.6	95359.1	2161.59
A12	20	32037.8	5164.78	13670.6	90860.1	3322.91
B1	20	28850.6	4344.84	14033.4	92197.8	2816.7
B2	20	33042.3	4701.8	15987.6	98474.2	2253.15
B3	20	28769.1	4204.88	17070.2	97263.4	2371.74
B4	20	29633.9	4356.23	17046.4	94127.5	2204.23
B5	20	32610.7	4755.86	19610.8	108328	3295.58
B6	20	25835.7	3440.19	17725	94115.3	1212.18
B7	20	29136.1	4192.41	17725.7	93465.2	1546.28
B8	20	103421	13478.2	54201.2	297010	7021.88
B9	20	36686.4	5678.56	17875.7	95077.3	2166.25
B10	20	38261.4	5868.53	16823.3	94472.5	2302.35
B11	20	45485.9	6656.34	17062.7	99966.2	3214.66
B12	20	56077.4	9405.49	17341.7	101598	5585.85
C1	20	35934.6	5902.01	17063.2	99443.1	2761.06
C2	20	41907.7	6363.1	22593.1	135164	4337.98
C3	20	29845.4	4564.51	17874.3	99179.7	2432.21
C4	20	32402.3	4598.25	16962.1	91582.8	2767.45
C5	20	32840.1	4572.36	18973.2	96069.4	2104.4
C6	20	30824	4530.29	18857.3	95066.3	1812.73
C7	20	28605.5	4237.35	19147.3	95845.3	1679.55
C8	20	30536.1	4586.39	18291.7	91915.1	1965.7
C9	20	39299.9	7183.33	19069.9	93091.2	2941.58
C10	20	33966.1	5356.29	17262.5	94512.6	2295.29
C11	20	35473.2	6122.51	16599.7	94780.4	2248.6
C12	20	41041.5	5932.91	16375.8	101240	3160.38
D1	20	40313.4	6265.12	17044.2	102086	2551.61
D2	20	31148.7	4986.79	18101.2	105062	2388.81
D3	20	52131.6	9165.53	22434.2	109733	6018.78
D4	20	35301.9	5794.84	19201.8	97595	3641.72
D5	20	35932.2	5123.85	20077.2	102059	2255.82
D6	20	41796.6	6842.31	20740.2	98856.8	3833.07
D7	20	27413.5	4214.53	18602.1	93506.7	1993.43
D8	20	29247.4	5496.39	19210.5	95586.3	1789.19
D9	20	34761.2	4926.75	17991.9	95989	2438.12
D10	20	39881.4	6643.25	18612	97525.5	3437.88
D11	20	42192.7	6805.62	18972.5	105448	2823.25
D12	20	115250	14286	21268.3	107683	4426.95
E1	20	43493.4	6303.57	17254.1	102538	4350.67
E2	20	35459	5740.19	17302.8	97789	2826.31
E3	20	48544.3	6823.2	20308.6	105567	4545.85
E4	20	33201.6	5438.36	19959.6	101985	2885.67
E5	20	31817.7	5140.47	19433.6	97295.6	2521.09
E6	20	114816	18601	27716.7	107234	8942.7
E7	20	50417.4	7599.07	20112.9	95402.9	4272.42
E8	20	51282.2	7532.01	19685.1	93495.8	4130.55
E9	20	52815.3	7580.8	18961	94695.6	2229.21
E10	20	35607.2	5418.5	17969.4	96883.9	2900.32
E11	20	41630.9	6861.05	18422	101292	4963.62
E12	20	48880.5	7604.42	17621	104248	3860.79
F1	20	41016.2	7404.14	18086.4	106450	7329.87
F2	20	36990.5	6054.73	17832.7	102497	3070.9
F3	20	33620.4	5484.22	19712.8	109239	3025.5
F4	20	33294	5139.14	20263.2	104952	2814.18
F5	20	36257.7	5688.54	21009.9	107426	2500.52
F6	20	47029.6	7879.27	22859.2	106045	4439.3
F7	20	28638	5035.95	20622.1	100767	4038.16
F8	20	31467.2	5181.71	19831.3	97126.4	3119.84
F9	20	31567.3	5257.49	18510.3	96622.6	4043.81
F10	20	33694.1	5396.21	18582.4	101175	3987.07
F11	20	35292	5920.84	18675.2	104929	3626.62
F12	20	50906	8697.11	18372.5	103202	4422.91
G1	20	40425.7	6349.58	17607.7	111970	3247.8
G2	20	50369.6	8212.67	19601.6	111813	3617.69
G3	20	38170.2	6114.44	19273	108165	3051.72
G4	20	31497.4	4895.43	19247.8	106919	2524.62
G5	20	30131	4599.99	19767.2	105141	2652.9
G6	20	31145.9	4993.96	20275.1	104841	2345.18
G7	20	28687.3	4738.34	18272.6	94562.8	2801.74
G8	20	32969.9	5829.71	20034.5	104963	3414.45
G9	20	45160.1	5669.86	19324.9	106272	3158.88
G10	20	37946.2	6964.6	18744.1	102918	2939.58
G11	20	61146.5	10546.5	21561.8	113038	8805.46
G12	20	41027	6494.85	18603.1	119238	2955.5
H1	20	50533.2	8076.41	18485	115660	7170.16
H2	20	38072.2	6479.51	17982.9	112753	3527.42
H3	20	32361.6	6229.49	19445.3	111077	4245.15
H4	20	31007.8	5521.02	18563.5	104970	2571.54
H5	20	32446	5589.61	19513.5	105807	2820.97
H6	20	39320.8	6930.08	27110.9	146898	4699.47
H7	20	28676.3	6599.33	4100.6	5239.65	2782.91
H8	20	26657	4357.5	2799.82	4889.39	2801.32
H9	20	31224.5	4744.04	3301.05	7231.67	4668.93
H10	20	37580.2	8368.56	6158.43	7658.63	3945.05
H11	20	40823.5	7008.08	4746.98	6920.13	4177.82
H12	20	40771.5	5208.36	3212.55	5405.17	2797.11
A1	21	30753.5	6096.96	9552.44	66862.2	2312.29
A2	21	58185.5	8211.83	14236.5	92640.4	2493.91
A3	21	54238.2	7631.15	15280.5	93128.3	1871.73
A4	21	30772.8	4273.96	15269.8	87376.8	2869.66
A5	21	30202.2	4436.89	16334.9	91633	2510.64
A6	21	40692.5	6376.06	17932.6	93285	3737.13
A7	21	31869.6	5069.35	16712	88589.8	3073.33
A8	21	149391	21133.8	54812.2	287087	13492.4
A9	21	34439.9	4865.91	16720.7	95335.5	2477.28
A10	21	29663.4	4713.35	15323.3	90409.8	3123.24
A11	21	28170	4206.19	14833.8	95704	2587.87
A12	21	31908.3	4786.83	13367.4	91273.3	3457.99
B1	21	29357.5	4404.66	13864.1	92676.2	2111.25
B2	21	32602.8	4834.14	16045.6	98534.3	1931.27
B3	21	28684.3	4137.16	17226.7	97298.5	2211.26
B4	21	29491.1	4012.94	16958.1	94212.4	2326.09
B5	21	32749.3	4403.54	19391.8	108369	3121.81
B6	21	26244.1	3689.53	17894.6	94191.5	1417.99
B7	21	31326.4	4396.09	17723	93615.3	1847.19
B8	21	109599	14044.6	54398.2	297544	6679.8
B9	21	38888.4	5810.93	17908.4	95134.2	2539.27
B10	21	41622.5	6201.36	16831.2	94209	2302.35
B11	21	48564.2	7150.14	17111	99487	3520.65
B12	21	59513.2	10132.6	17329.3	101898	5574.61
C1	21	37481	6241.9	16851.3	99320	2629.85
C2	21	44095	6366.51	22554.2	135131	3824.23
C3	21	31296	4872.12	17905.7	99237.4	2462.58
C4	21	35409.3	5059.47	17151.6	91840	2172.5
C5	21	36287.3	5177.13	18969	96665.1	2634.01
C6	21	33732.2	4848.43	18979.6	95063.7	1965.66
C7	21	29767.4	4299.28	19132.2	96434.8	1649.87
C8	21	31509.3	4528.39	18188.3	92059.6	2206.58
C9	21	40171.1	6956.35	19006.6	92956.9	2904.67
C10	21	36278.4	5632.27	17113.6	94538.8	1973.07
C11	21	38091.8	6414.37	16708.7	94826.8	2349.1
C12	21	44609.1	6290.43	16302	101361	2771.56
D1	21	40092.7	6198.74	17124.2	102185	2978.64
D2	21	31717	4763.31	18328.6	105242	2521.22
D3	21	52069.6	8965.34	22455.4	109703	6016.68
D4	21	36736.6	5613.82	19105.4	97723.3	3952.6
D5	21	37142.8	5158.81	20362.9	102025	2181.92
D6	21	43269.5	7004.73	20910.2	98939.4	3664.75
D7	21	27754	4113.5	18590.2	93813.2	1976.12
D8	21	29596.3	5720.14	19125.8	96018.5	1960.74
D9	21	34810.7	4850.73	18216.5	96115.8	2592.11
D10	21	41454	6629.18	18891.8	97541.8	3425.3
D11	21	44274.4	7012.98	18909.7	105598	2544.89
D12	21	117579	14566.9	20993	108230	4877.09
E1	21	44337.7	6427.62	17155.9	102318	3980.42
E2	21	36407.9	5978.51	17369.2	97749.4	3221.58
E3	21	49667.9	6798.1	20228.4	105682	4820.61
E4	21	33523.8	5403.67	20118.2	101918	2465.92
E5	21	32055.2	5151.97	19296.3	97103.9	2614.71
E6	21	115315	18587.2	27779.5	107727	9289.22
E7	21	65198.6	9076.92	20247.6	95008	3901.32
E8	21	67867.5	9418.17	19671.9	93208.4	4168.94
E9	21	71190.2	9398.93	19140.6	94717.2	2393.78
E10	21	38392.8	5829.84	18169.8	97313.8	3060.07
E11	21	45575.2	7187.72	18386.6	101217	4837.46
E12	21	52788.2	8364.28	17802.4	104136	3987.63
F1	21	41857.6	7701.45	18056.3	106524	7680.74
F2	21	38082.4	5976.09	18071.1	102695	3160.83
F3	21	35431.8	5780.35	19799.6	108993	3314.71
F4	21	35070.6	5521.18	20120.9	105242	3062.9
F5	21	38222.4	5751.7	21118	107995	2495.44
F6	21	48394.1	8125.61	22948	106253	4392.27
F7	21	29483	5230.03	20480.2	101262	3859.25
F8	21	32165.7	5277.15	19663.4	97622.7	3070.36
F9	21	32023.7	5181.86	18440.8	96458.5	3868.55
F10	21	36387.2	5578.94	18416.2	101346	3850.79
F11	21	38451.8	6484.25	18771.2	104938	3342.06
F12	21	53941.1	9277.95	18407.7	103184	4381.53
G1	21	43977	7024.56	17660.9	111440	3218.16
[truncated: 10,487 more rows]

## Sheet: Multicomponent Data
Block Type	96alum
Chemistry	SYBR_GREEN
Experiment File Name	D:\ShuJu\LZM\spx1-5 zuzhi chyi biaoda.eds
Experiment Run End Time	2023-07-13 07:21:08 AM CST
Instrument Type	sds7500
Passive Reference	ROX
Well	Cycle	SYBR	ROX
A1	1	15732.1	68342.4
A2	1	29016	93852.6
A3	1	26962.4	94330.8
A4	1	29112.7	88599.5
A5	1	29753.3	92724.2
A6	1	39331.6	94163.2
A7	1	31247.4	89457.6
A8	1	150202	293281
A9	1	33201.2	98295.4
A10	1	28331.8	92741
A11	1	28279.1	99133.1
A12	1	30552.1	93655.3
B1	1	28571.6	94461.5
B2	1	32244.3	99744.2
B3	1	28021.3	97939
B4	1	28161.6	94980.2
B5	1	31840	109695
B6	1	24873	94936.7
B7	1	26766.1	94557.7
B8	1	93711.5	298926
B9	1	34571.6	95939.7
B10	1	33626	95064
B11	1	39731.5	101656
B12	1	50436.4	104502
C1	1	31834.8	99572.1
C2	1	38284.9	136212
C3	1	26539.1	99601.1
C4	1	28545.1	92363.2
C5	1	29480.3	97235.1
C6	1	27095.9	95953.1
C7	1	27656.2	97286.9
C8	1	29392.5	93073.2
C9	1	40010.4	94335.4
C10	1	30635.6	95190.6
C11	1	30945.7	96067.1
C12	1	35437.9	103369
D1	1	38444.2	102245
D2	1	30941.7	105898
D3	1	51248.7	111020
D4	1	34334.6	98441.8
D5	1	34161	102700
D6	1	40426.9	100169
D7	1	27228	94942.1
D8	1	29104.2	96369.5
D9	1	34869.3	97064.1
D10	1	37897	98532.8
D11	1	40034.6	106461
D12	1	98311.4	108609
E1	1	41495.8	103289
E2	1	34176	98854.2
E3	1	48502.8	106750
E4	1	31791.8	103150
E5	1	31153.7	98706.5
E6	1	120436	110280
E7	1	33784.9	96315.2
E8	1	31873.2	94158.3
E9	1	31433.2	96115.6
E10	1	31778.7	98064.3
E11	1	36446.2	102428
E12	1	43037.4	106152
F1	1	38644.6	107680
F2	1	31766.7	103644
F3	1	31342.2	110523
F4	1	30648.7	106698
F5	1	33555.3	109038
F6	1	45575.8	107911
F7	1	27979.6	102459
F8	1	30329.1	98646.1
F9	1	29720.5	97634.6
F10	1	29402.9	102952
F11	1	30146.8	107066
F12	1	45218.7	105176
G1	1	37646.2	113309
G2	1	45570.2	113769
G3	1	33621.1	109651
G4	1	30995.7	108426
G5	1	29685	106806
G6	1	31089	106115
G7	1	28699.9	96268.4
G8	1	32602.7	106616
G9	1	44923.8	106891
G10	1	36266	104830
G11	1	55797.4	114518
G12	1	41720.7	122212
H1	1	50250.1	116728
H2	1	38958.6	115153
H3	1	32578.3	113595
H4	1	30452	107193
H5	1	31609.2	107834
H6	1	37831.6	149800
H7	1
H8	1
H9	1
H10	1
H11	1
H12	1
A1	2	14941.8	68411.7
A2	2	28837.7	93719.1
A3	2	27099.8	93325
A4	2	29117.2	88134.5
A5	2	29661.9	92396.3
A6	2	39537.8	94124.5
A7	2	31864.6	89714.9
A8	2	150163	292574
A9	2	33602.3	97947.8
A10	2	28471.9	92074.2
A11	2	27785.9	97475.5
A12	2	30636.9	93248.4
B1	2	29079	93257.1
B2	2	32430.5	98442.1
B3	2	28505.4	96999
B4	2	28486.7	93807.8
B5	2	31830.9	109112
B6	2	24954.2	94828.1
B7	2	26682.5	94084.9
B8	2	94704	298571
B9	2	34750.2	95213.3
B10	2	34060.3	94243.8
B11	2	40392	101060
B12	2	51843.1	103983
C1	2	32494.5	99724.6
C2	2	38280.9	134437
C3	2	26472.2	99033.9
C4	2	29167	91699.6
C5	2	29658.6	97012.9
C6	2	27215.4	95240.6
C7	2	27627.8	96646.4
C8	2	29477.6	92574.9
C9	2	39787.1	93570.5
C10	2	30756.1	94197.8
C11	2	31225.6	95645.4
C12	2	36443.9	102969
D1	2	39281.3	102143
D2	2	30617.2	104535
D3	2	51447	110120
D4	2	34371.8	97813.9
D5	2	34274.5	102463
D6	2	40691.1	99456.8
D7	2	27453.2	94039.7
D8	2	29042.3	96023.2
D9	2	34458.5	96308.3
D10	2	38059.4	98183.6
D11	2	40136.8	105084
D12	2	101217	108560
E1	2	41431.4	103220
E2	2	33998.9	98052.4
E3	2	48419.9	105988
E4	2	32021.5	102088
E5	2	31049.8	97864.8
E6	2	118903	109705
E7	2	33901.8	95812
E8	2	32020.5	93675.4
E9	2	31687.3	95371
E10	2	31999	97442.5
E11	2	36329.4	101714
E12	2	43375.3	106235
F1	2	39330.7	107415
F2	2	32353.8	102603
F3	2	31454.4	109259
F4	2	30762.4	105634
F5	2	33902.5	108121
F6	2	45739.7	107067
F7	2	27725.2	101352
F8	2	30767.7	97745.9
F9	2	30229.2	96997.2
F10	2	29588.8	101809
F11	2	30533.5	105403
F12	2	45595	104748
G1	2	37468.9	112535
G2	2	45348.8	112133
G3	2	33878.9	108279
G4	2	30905.1	107241
G5	2	29788.2	106042
G6	2	31174.7	105194
G7	2	28801.8	95174.1
G8	2	32470	105855
G9	2	45518.7	106145
G10	2	36804.3	103536
G11	2	56825.1	112976
G12	2	41542.9	121792
H1	2	50272.7	116177
H2	2	38907.9	114581
H3	2	32012.4	113326
H4	2	30299.1	106590
H5	2	31793.3	107237
H6	2	37721.4	148600
H7	2
H8	2
H9	2
H10	2
H11	2
H12	2
A1	3	15576.9	68256.4
A2	3	28971.9	93237
A3	3	27472.8	93598
A4	3	29432.6	87981.2
A5	3	30021	92035.5
A6	3	39183.6	93871
A7	3	32186.6	89475.8
A8	3	150421	291066
A9	3	33592.6	97510.5
A10	3	28594.8	91340.5
A11	3	28105.1	96892.9
A12	3	31252.6	93185.9
B1	3	29123	93333.5
B2	3	32158.2	97845.7
B3	3	28338.3	96694
B4	3	28551.9	93781.4
B5	3	31722.1	108188
B6	3	24953.8	94545.4
B7	3	26788.9	93895.3
B8	3	94671.1	296736
B9	3	34606.3	95291.4
B10	3	34308.2	94145.3
B11	3	40469.6	100606
B12	3	51808.4	103643
C1	3	32593.1	99459.8
C2	3	38768.3	134198
C3	3	26569.2	98653.9
C4	3	29119.9	91725.5
C5	3	29547.3	96436.6
C6	3	27477.8	95051.6
C7	3	27548.7	96493.3
C8	3	29459.3	92247.3
C9	3	39148.9	93203.2
C10	3	30744.1	94135.5
C11	3	31659.6	95032.1
C12	3	36752.6	102630
D1	3	39079.3	101675
D2	3	31031.8	104483
D3	3	51160.5	109611
D4	3	34496.1	97728.8
D5	3	34273.5	102019
D6	3	40549.6	99183.4
D7	3	27387.1	93713.5
D8	3	28969.2	96316.9
D9	3	34505.9	95799.2
D10	3	38211.7	97244.3
D11	3	39738.8	105490
D12	3	102945	108465
E1	3	41133.9	102392
E2	3	34007.8	97367.5
E3	3	48465.8	105598
E4	3	31933.1	101997
E5	3	31245.7	97877
E6	3	118024	109050
E7	3	33754.9	95617.7
E8	3	31894.3	93814.7
E9	3	31529.7	95152.2
E10	3	32343.8	96853
E11	3	37079.8	101107
E12	3	43497.5	105736
F1	3	39392.4	107062
F2	3	32473.8	102095
F3	3	31477.2	108860
F4	3	31572.9	105120
F5	3	33615.2	107777
F6	3	45735.5	106623
F7	3	28120.4	101221
F8	3	30547.5	97396.4
F9	3	30424.2	96600.5
F10	3	29468.1	101303
F11	3	30729.4	105219
F12	3	45695.2	104717
G1	3	37912	112348
G2	3	45228.1	112028
G3	3	34218.9	107990
G4	3	31164.5	106652
G5	3	29894.9	105270
G6	3	31403.6	104842
G7	3	28742.9	94820.3
G8	3	32541.8	105547
G9	3	45167	105817
G10	3	37441.4	103222
G11	3	57027.7	112855
G12	3	41346.4	121266
H1	3	50466.4	116494
H2	3	39086.7	114134
H3	3	32564.7	112596
H4	3	30551.3	106300
H5	3	31722.5	106953
H6	3	38313.7	148745
H7	3
H8	3
H9	3
H10	3
H11	3
H12	3
A1	4	15599.1	68026.5
A2	4	29131.7	93533
A3	4	27562.1	93597.3
A4	4	29758.4	87390.5
A5	4	29890	91551.8
A6	4	39797.8	93663.5
A7	4	32142.7	89357.6
A8	4	150844	291109
A9	4	34055.1	96641.8
A10	4	28984.3	91246.3
A11	4	27925.2	96498.7
A12	4	31144.5	92626.7
B1	4	28884.6	92821.6
B2	4	32606	98385
B3	4	28219.1	97444
B4	4	28482.9	93836.9
B5	4	31966.6	108339
B6	4	24988.9	94565.5
B7	4	27015.3	93671.4
B8	4	94390.5	297743
B9	4	34900.8	95124.7
B10	4	33909.3	94209.5
B11	4	40754.3	100247
B12	4	52070.1	103349
C1	4	32651.7	99124.1
C2	4	38768.3	134571
C3	4	27028.1	98834.3
C4	4	28102.5	91434.9
C5	4	29581.9	96740.9
C6	4	27020.7	94848.7
C7	4	27632.7	96528
C8	4	29339.6	92369.4
C9	4	39203.2	93339.1
C10	4	30905	93822.5
C11	4	31966	94705.1
C12	4	37233.2	102390
D1	4	39592	101640
D2	4	30847.1	104693
D3	4	51008	109971
D4	4	34122.8	97516.3
D5	4	34309.9	102047
D6	4	40363.8	99136.6
D7	4	27145.8	93895.1
D8	4	29218.3	95731.3
D9	4	34385.9	96016.3
D10	4	38289.8	97265
D11	4	40416.2	105416
D12	4	104012	108231
E1	4	41656.8	102360
E2	4	34176	97789.5
E3	4	48454.4	105720
E4	4	32054.9	102131
E5	4	31262.4	97971.5
E6	4	117505	108975
E7	4	33734.7	95684.6
E8	4	31862.7	93498
E9	4	31699.4	95263.6
E10	4	32165.2	96909.3
E11	4	36588	101381
E12	4	43558.8	105758
F1	4	39349.9	106655
F2	4	32953.7	102095
F3	4	31642	109184
F4	4	31592.7	105116
F5	4	33807	107940
F6	4	45830	106481
F7	4	27620.2	101766
F8	4	30606.8	97682
F9	4	30346	96626
F10	4	29733.4	101560
F11	4	31316.3	105250
F12	4	46559.6	104440
G1	4	37574	111802
G2	4	45725.5	111831
G3	4	34167.6	108084
G4	4	31292.1	106897
G5	4	29898.9	105330
G6	4	31082.6	104883
G7	4	28676.2	94867.9
G8	4	32792.6	105432
G9	4	45482.7	105601
G10	4	37558.2	103283
G11	4	57011.6	112607
G12	4	41627.6	120516
H1	4	50249.3	116808
H2	4	38619.9	113949
H3	4	32548.2	112203
H4	4	30532	105678
H5	4	31951.3	106684
H6	4	38255.9	148539
H7	4
H8	4
H9	4
H10	4
H11	4
H12	4
A1	5	15644.5	68265.3
A2	5	29464.9	93502.1
A3	5	27634.3	93266
A4	5	29785.4	87193.1
A5	5	30316.4	91999.8
A6	5	39507.8	94013.4
A7	5	31956.7	89366.8
A8	5	149909	289816
A9	5	34059.5	97038.2
A10	5	29530.7	91238.8
A11	5	27971.6	96254.2
A12	5	31505.5	92643
B1	5	28964.7	92668.3
B2	5	32166.9	98186.9
B3	5	28688.2	96905.3
B4	5	28703	93515.9
B5	5	31695.9	108292
B6	5	25037.5	94212.1
B7	5	26901.5	93587.6
B8	5	94219.8	297100
B9	5	34441.2	95098.6
B10	5	34191.5	94609.9
B11	5	41198.6	100169
B12	5	51730.7	102897
C1	5	32913.3	99449
C2	5	39038.5	135048
C3	5	26794.8	99111.1
C4	5	28506.6	91801.1
C5	5	29388.5	96400.5
C6	5	27104.5	95262.6
C7	5	27553.3	96541
C8	5	29224.8	92409.1
C9	5	38728.9	93356.2
C10	5	30825.5	94009.5
C11	5	31867.1	95002.4
C12	5	37426.8	102345
D1	5	39484.3	102037
D2	5	30992.3	104648
D3	5	50762.2	109853
D4	5	34226.9	97895.4
D5	5	34157.6	102245
D6	5	40202.1	99234.6
D7	5	27161.5	93655.6
D8	5	29200	95745.8
D9	5	34493.8	95944.9
D10	5	38151.4	97605.6
D11	5	40005.4	105431
D12	5	105032	108169
E1	5	41851.9	102481
E2	5	33697	97779.3
E3	5	47967.7	105571
E4	5	31714.1	101850
E5	5	31061.7	97774.1
E6	5	116939	108604
E7	5	33422.4	95607.1
E8	5	32102.6	93869.2
E9	5	31461.5	94987.1
E10	5	32012.1	97148.9
E11	5	36650.5	101626
E12	5	43610.1	105448
F1	5	39514	106722
F2	5	33187.5	102038
F3	5	31690.9	109160
F4	5	31267.1	105279
F5	5	33693.6	107672
F6	5	45467	106951
F7	5	27954.5	101385
F8	5	30779.4	97318.6
F9	5	30434.9	96574.2
F10	5	29539.1	101507
F11	5	31078.5	105009
F12	5	46740.6	104543
G1	5	37773.5	111881
G2	5	45878.8	111846
G3	5	34574.4	107950
G4	5	31340.7	106859
G5	5	29940.6	105171
G6	5	31120.2	105103
G7	5	28667.2	94957
G8	5	32787.8	105460
G9	5	45317.7	106250
G10	5	37587.9	103135
G11	5	57414.5	112694
G12	5	41629.4	120735
H1	5	50156.5	116539
H2	5	38347.6	113816
H3	5	32357.3	112052
H4	5	30383.9	105603
H5	5	32171.9	106305
H6	5	38639.5	148332
H7	5
H8	5
H9	5
H10	5
H11	5
H12	5
A1	6	15900.6	68086.4
A2	6	29733.9	93179.1
A3	6	27551.8	93386.9
A4	6	29536.6	87461.3
A5	6	29768.3	91736.5
A6	6	39504.2	93383.2
A7	6	32169.9	89211.7
A8	6	151069	290805
A9	6	33913.7	96701.5
A10	6	29374.7	91150
A11	6	28139.6	96458.6
A12	6	30886.1	92626.3
B1	6	28517.1	93056
B2	6	32416.5	98248.1
B3	6	28511.2	97008
B4	6	28741.5	93900
B5	6	31954.9	108519
B6	6	25022.4	94383.7
B7	6	26713.9	93810.6
B8	6	95015.9	297229
B9	6	34586.7	95298.8
B10	6	33918.4	94218.2
B11	6	41025.5	100589
B12	6	51780.6	103046
C1	6	32964.2	99540.1
C2	6	39096.4	135310
C3	6	26824.1	99163.1
C4	6	28785.7	91618.4
C5	6	29701.6	96630.8
C6	6	27140.4	95212.8
C7	6	27754.4	96561
C8	6	29539.1	92475.9
C9	6	38599.8	93385.2
C10	6	30874.1	94361.2
C11	6	32325	94946.7
C12	6	37633.2	102404
D1	6	39550.2	101899
D2	6	31235.2	104630
D3	6	50623.6	109870
D4	6	34268.3	97557
D5	6	34158	102018
D6	6	40195.1	99164.6
D7	6	27206.3	93849.5
D8	6	29291.7	95826.7
D9	6	34257.8	96108.8
D10	6	38115.3	97505
D11	6	40244.2	105582
D12	6	106020	108073
E1	6	41594.1	102681
E2	6	34563.8	97566.3
E3	6	48040.5	105794
E4	6	31806.2	102139
E5	6	31203.9	97587.7
E6	6	116360	108750
E7	6	33664.6	95070.4
E8	6	32060.5	93648.4
E9	6	31695.5	95064.8
E10	6	32032.3	96965.1
E11	6	36835.9	101394
E12	6	43458.8	105258
F1	6	39205.1	106529
F2	6	33695	102376
F3	6	31647.5	109055
F4	6	31375	105228
F5	6	33903.3	107849
F6	6	45599.2	106707
F7	6	27964.1	101100
F8	6	30434.1	97535.4
F9	6	30285.7	96588.4
F10	6	29578.7	101192
F11	6	31181.4	105020
F12	6	46374	104060
G1	6	37462	112066
G2	6	45744.8	111948
G3	6	34186.6	108227
G4	6	31384.9	106526
G5	6	29882.4	104954
G6	6	31175.7	104781
G7	6	28679.4	95010.8
G8	6	32595.4	105436
G9	6	45133.9	106065
G10	6	37845.1	103426
G11	6	57271.8	112999
G12	6	41601.7	120928
H1	6	49962.9	116689
H2	6	38574.2	113579
H3	6	32496.4	112090
H4	6	30794.9	105474
H5	6	32337.8	106357
H6	6	38631.2	148053
H7	6
H8	6
H9	6
H10	6
H11	6
H12	6
A1	7	15634.9	67094.6
A2	7	29178	93160.5
A3	7	27766.3	93715.4
A4	7	29488.1	87413.8
A5	7	30263.1	91642.8
A6	7	39531.5	93670.1
A7	7	31916.2	89016.8
A8	7	150241	290634
A9	7	34095.7	96509.1
A10	7	29079.4	91019.6
A11	7	28200.8	95946
A12	7	30812.1	92268.5
B1	7	28740.9	92683.1
B2	7	32688.4	98602.8
B3	7	28508.2	96932.3
B4	7	28833.3	94033.2
B5	7	31763.5	108628
B6	7	24975	94294.8
B7	7	26554.4	93571.1
B8	7	94695.5	297791
B9	7	34371.5	95073
B10	7	34151.7	94465.2
B11	7	40989.3	100444
B12	7	51754.6	102795
C1	7	33441.3	99418.1
C2	7	38809.3	134893
C3	7	26622.7	99120.6
C4	7	28692.7	92122.2
C5	7	29416.8	96719.5
C6	7	27251.9	95330.1
C7	7	27753.8	96642.4
C8	7	29411.1	92367.6
C9	7	38612.9	93116.7
C10	7	30885.5	94550
C11	7	31900	94893.7
C12	7	37690.3	102303
D1	7	39732.6	101772
D2	7	31362.4	104559
D3	7	50861.2	109757
D4	7	34312.4	97683.9
D5	7	34171.1	102111
D6	7	40257.5	99275.2
D7	7	27180.3	94097.4
D8	7	29218.7	96065.4
D9	7	34332.9	95965.3
D10	7	38187.1	97694.2
D11	7	39714.6	105712
D12	7	107315	108478
E1	7	41867.3	102687
E2	7	34553.1	97850.9
E3	7	47929.5	105856
E4	7	31997.6	102137
E5	7	31113.4	97636.7
E6	7	116640	109119
E7	7	33787.4	95596.9
E8	7	32264.3	93709.9
E9	7	31851.4	95102.3
E10	7	31982.6	97476.3
E11	7	36798.5	101714
E12	7	43597.5	105138
F1	7	40020.6	106561
F2	7	33789.2	102385
F3	7	31580.6	109058
F4	7	31406.3	105339
F5	7	33900.2	107989
F6	7	45351.6	106976
F7	7	27984.6	101237
F8	7	30613.1	97694.1
F9	7	30463	96642.9
F10	7	29916.5	101736
F11	7	31591.9	105591
F12	7	46504.1	104302
G1	7	37981.7	111879
G2	7	45825.5	112033
G3	7	34593.4	108125
G4	7	31653.6	106681
G5	7	30352.5	105762
G6	7	31147.2	105072
G7	7	28771.4	95097.7
G8	7	32989.4	105267
G9	7	45081	105896
G10	7	37753.9	103025
G11	7	58082.9	113120
G12	7	41323.2	120403
H1	7	50635.3	116341
H2	7	38470.1	113738
H3	7	32587.9	111779
H4	7	30394.5	105601
H5	7	31998.5	106225
H6	7	38655.5	148031
H7	7
H8	7
H9	7
H10	7
H11	7
H12	7
A1	8	15780.9	67993.2
A2	8	29289.2	93176.3
A3	8	27617.1	93791.1
A4	8	29857.1	87506.1
A5	8	30039	91512.2
A6	8	39409.5	93278.3
A7	8	31955	89292.4
A8	8	150989	290165
A9	8	33720.6	96133.4
A10	8	29270.7	90965.9
A11	8	27891.7	96153.5
A12	8	31375.8	92134.3
B1	8	28479.9	92390.2
B2	8	32344.5	98823.5
B3	8	28592.2	97475.1
B4	8	28800	94084.1
B5	8	31978.3	108739
B6	8	25188.2	94478.1
B7	8	26834.3	94025.9
B8	8	95305.4	297117
B9	8	34572.3	94972.8
B10	8	34022	94691.1
B11	8	41099.7	100227
B12	8	51812.8	102678
C1	8	33090.4	99084.6
C2	8	39059.2	135076
C3	8	26741.1	99415.2
C4	8	28685.7	92092.2
C5	8	29923.6	96555.9
C6	8	27272.6	95319.7
C7	8	27513.6	96914.5
C8	8	29309.9	92857.9
C9	8	38540.8	93658.4
C10	8	31116.4	94418.8
C11	8	31886.2	95377.2
C12	8	37588.5	102001
D1	8	39578.4	102417
D2	8	31064.6	105128
D3	8	50699.9	109994
D4	8	34245.9	97627.8
D5	8	34408.3	102149
D6	8	40587	99375.4
D7	8	27310.8	94219.5
D8	8	28893.4	96355
D9	8	34278.9	96288.9
D10	8	38217.5	97865.5
D11	8	40228.6	105951
D12	8	107889	108367
E1	8	42423.8	102758
E2	8	34849.8	98018.9
E3	8	47918.1	106091
E4	8	31759	102416
E5	8	31302.2	98106.3
E6	8	116101	109145
E7	8	33681.9	95789.6
E8	8	31857.6	93986.3
E9	8	31526.1	95456.4
E10	8	32095.6	97428.6
E11	8	36882.1	101658
E12	8	43657	104787
F1	8	40156.4	107322
F2	8	33487.3	102294
F3	8	31619.7	109094
F4	8	31861.5	105589
F5	8	33643.5	108119
F6	8	45182.2	106778
F7	8	28093.2	101438
F8	8	30456.2	97872.1
F9	8	30275.9	96894.6
F10	8	29622.2	101706
F11	8	31518	105715
F12	8	46599.3	103776
G1	8	37517.5	111684
G2	8	45869.9	112013
G3	8	34657	108649
G4	8	31270	107055
G5	8	30160.6	105578
G6	8	31189.4	105226
G7	8	28522.8	94942.5
G8	8	32772.5	105650
G9	8	45319.7	106177
G10	8	37886.2	103428
G11	8	58135.4	112978
G12	8	41673.3	120213
H1	8	49924.7	116483
H2	8	38075	113662
H3	8	32624.6	111719
H4	8	30349.4	105627
H5	8	32291.2	106414
H6	8	38730	148303
H7	8
H8	8
H9	8
H10	8
H11	8
H12	8
A1	9	15811.3	67695.1
A2	9	29403.2	92733.4
A3	9	27891.3	93761.8
A4	9	29936	87592.6
A5	9	30042.3	91684.2
A6	9	39858	93527
A7	9	31990.8	89420.2
A8	9	149982	289657
A9	9	33949.4	96562
A10	9	29926.8	91049.1
A11	9	28112.3	96182
A12	9	31238.6	92157.5
B1	9	28873.1	92541.4
B2	9	32590.4	98774.7
B3	9	28317.2	97122.8
B4	9	28563.8	94209.6
B5	9	32077.9	108399
B6	9	25062.9	94611.3
B7	9	26839.8	94048.2
B8	9	94993.5	297107
B9	9	34640.9	95369.9
B10	9	34312.6	94735.9
B11	9	41291.2	100191
B12	9	52090.3	102365
C1	9	33493.7	99644.2
C2	9	39114.2	135495
C3	9	26949.7	99018.1
C4	9	28570.1	92036
C5	9	29617.3	96820.9
C6	9	27417	95648.7
C7	9	27836.2	96667.3
C8	9	29273.3	92792
C9	9	38664.2	93352.8
C10	9	30783.4	94463.4
C11	9	32305.9	95321
C12	9	38022.5	102701
D1	9	39860.4	102480
D2	9	31413.8	105145
D3	9	50873.6	110008
D4	9	34023.2	97987
D5	9	34245	102458
D6	9	40346.3	99408.9
D7	9	26986.6	94103.4
D8	9	28601.2	96358.8
D9	9	34592.4	96257.8
D10	9	38285.6	97997.2
D11	9	40049.3	105862
D12	9	108371	108305
E1	9	41859.5	102740
E2	9	34555.8	97996
E3	9	47908.8	105970
E4	9	32018.9	102070
E5	9	31109.1	97755
E6	9	115625	109159
E7	9	33901.4	95839.4
E8	9	32257.1	94208.2
E9	9	31447.5	95200.2
E10	9	32053.9	97479.4
E11	9	36921.5	101771
E12	9	43530.4	105128
F1	9	39704.1	107067
F2	9	33896.9	102646
F3	9	32010.2	109175
F4	9	31486.9	105471
F5	9	34275.8	108246
F6	9	45550.9	106918
F7	9	27892.2	101646
F8	9	30873.3	97840.3
F9	9	30444	96781.8
F10	9	29638.6	101824
F11	9	31446.8	105695
F12	9	46863.9	104119
G1	9	37614.2	111790
G2	9	46162	112541
G3	9	34722.6	108436
G4	9	31499.4	107266
G5	9	30055.2	105397
G6	9	31128	105192
G7	9	28704.7	95048.8
G8	9	32640.8	105827
G9	9	45276.9	106226
G10	9	37511.3	103564
G11	9	58389.2	112880
G12	9	41427	120261
H1	9	49840.5	116802
H2	9	38293	113008
H3	9	32360.5	112064
H4	9	30771.8	105445
H5	9	32188	106599
H6	9	38955.1	148191
H7	9
H8	9
H9	9
H10	9
H11	9
H12	9
A1	10	15623.4	68118.2
A2	10	29643.3	93217.1
A3	10	27871.8	93606.6
A4	10	29842.8	87587.6
A5	10	30291	91953.9
A6	10	39553.8	93809.7
A7	10	31999	89132.7
A8	10	150560	290422
A9	10	33954.1	96105.9
A10	10	29063.3	91087.5
A11	10	28217.7	96502.6
A12	10	31289.4	92174.6
B1	10	28938	92934.9
B2	10	32574.2	98518.3
B3	10	28594.5	97393.3
B4	10	28895.3	94228.1
B5	10	31954.7	108786
B6	10	25198.7	94495.1
B7	10	26718.2	93879.6
B8	10	95493	297147
B9	10	34624.9	95165.6
B10	10	34529.4	94843.8
B11	10	41061.3	100716
B12	10	51863.6	102507
C1	10	33378.7	99510.8
C2	10	39787.5	135656
C3	10	27566.7	98964.1
C4	10	28921.9	91722.7
C5	10	29558.3	96815
C6	10	27602.3	95113.2
C7	10	27695	96532
C8	10	29332.6	92539.4
C9	10	38670.6	93520.9
C10	10	31247.8	94613.2
C11	10	32298.1	95338.9
C12	10	37838.1	102227
D1	10	39859.1	102033
D2	10	31033.4	105457
D3	10	50924.8	110086
D4	10	34365.3	97808.2
D5	10	34216.2	102505
D6	10	40654.9	99351.3
D7	10	27489.8	93901.8
D8	10	28636.1	96499.8
D9	10	34545.7	96317.8
D10	10	38146.8	97777.5
D11	10	39918.9	106137
D12	10	109154	108505
E1	10	42192.5	102746
E2	10	35073.6	97960.5
E3	10	48175.3	106214
E4	10	32144.5	102153
E5	10	31287	97661
E6	10	115503	108972
E7	10	33721	95703.7
E8	10	32023	93989.2
E9	10	31644.2	95102.9
E10	10	32274.2	97491.5
E11	10	37197.1	101743
E12	10	43580.8	105040
F1	10	39703.7	106993
F2	10	34091.8	102564
F3	10	32228.1	109550
F4	10	31689.4	105576
F5	10	33848.6	108258
F6	10	45403.7	106749
F7	10	27785.7	101623
F8	10	30767.7	97763.2
F9	10	30607	96745.1
F10	10	29626.3	101807
F11	10	31741.2	105487
F12	10	46760.4	104044
G1	10	37464.9	111949
G2	10	45753.3	112352
G3	10	34848.3	108265
G4	10	31397.5	107028
G5	10	29932	105477
G6	10	30965.5	105342
G7	10	28764.1	95013.9
G8	10	32710.4	105569
G9	10	45514.2	106050
G10	10	38019.7	103378
G11	10	58432.3	113194
G12	10	41267.1	120093
H1	10	49878.7	116005
H2	10	38267	113632
H3	10	32527.8	112014
H4	10	30551.2	105534
H5	10	32287.8	106281
H6	10	39082.2	148088
H7	10
H8	10
H9	10
H10	10
H11	10
H12	10
A1	11	15770.6	67385.8
A2	11	30103.3	93358.6
A3	11	27939	93447.4
A4	11	29814.5	87711.6
A5	11	30077	91757.2
A6	11	39738.8	93733.9
A7	11	31908.4	89251.6
A8	11	149186	289016
A9	11	33941.8	96304.6
A10	11	29668.4	91056.9
A11	11	27991.4	95960
A12	11	31544.3	92021.7
B1	11	29191.7	92903.5
B2	11	33121.5	98886.2
B3	11	28366.2	97376
B4	11	28519.6	94421.1
B5	11	31641.9	108798
B6	11	24896.1	94570.6
B7	11	27137.5	94105.4
B8	11	94997.6	298037
B9	11	34308.4	95322.8
B10	11	34614.6	94763.8
B11	11	41202.2	100584
B12	11	52562.1	102783
C1	11	33214.8	99622.1
C2	11	40136.4	135163
C3	11	27094.9	99443.2
C4	11	28888.2	92233
C5	11	29683.3	97155.2
C6	11	27407.4	95454.6
C7	11	27842	96757
C8	11	29337.5	92775.9
C9	11	38407.2	93506.2
C10	11	31073	95051.5
C11	11	32401.1	95103.3
C12	11	37596.2	101806
D1	11	40066.5	102013
D2	11	31161.1	105283
D3	11	50915.1	110400
D4	11	34101.2	97807.3
D5	11	34335.3	102342
D6	11	40214.1	99589.1
D7	11	27087.8	94204.6
D8	11	28988.6	96393.1
D9	11	34371.4	96306.5
D10	11	38487.5	97546.7
D11	11	39823	105504
D12	11	109655	108475
E1	11	42280.8	102850
E2	11	34653.3	98236.3
E3	11	47882.4	105934
E4	11	32031.6	102126
E5	11	31247.8	97830
E6	11	115772	108868
E7	11	33874.1	96147.9
E8	11	32260.3	94038.9
E9	11	31455.9	95391.1
E10	11	32131.5	97362.9
E11	11	37147.9	101768
E12	11	43980.9	104935
F1	11	40120.7	107544
F2	11	34159.6	102653
F3	11	31970.9	109471
F4	11	31559.5	105512
F5	11	33958.6	108357
F6	11	45354.5	106902
F7	11	27821.4	101650
F8	11	30779.2	97664.5
F9	11	30510.8	97220.9
F10	11	29810.5	101904
F11	11	31839.2	105464
F12	11	46648.1	104038
G1	11	37772.5	111674
G2	11	46040	112192
G3	11	34768.7	108579
G4	11	31614.4	107299
G5	11	30181.4	105682
G6	11	30850.4	105252
G7	11	28778.4	95233.8
G8	11	32804.3	105551
G9	11	45314	106368
G10	11	37484.9	103650
G11	11	58691.5	113331
G12	11	41597.2	119808
H1	11	50331.2	116161
H2	11	38045.2	113433
H3	11	32371.2	111899
H4	11	30827.2	105399
H5	11	32144.8	106299
H6	11	39158.8	147997
H7	11
H8	11
H9	11
H10	11
H11	11
H12	11
A1	12	15501.3	67627.8
A2	12	29985.5	93278.5
A3	12	27752.1	93771.5
A4	12	30392.9	87294.5
A5	12	29920.4	92020.5
A6	12	39513.3	93957.1
A7	12	31935.9	89392.6
A8	12	149025	289712
A9	12	33671	96393
A10	12	29267.9	91143.9
A11	12	27978	96192.3
A12	12	31473	92296.7
B1	12	28993.7	92877.1
B2	12	32417.7	98910.2
B3	12	28507.8	97438.8
B4	12	28681.5	94153.4
B5	12	31813.4	109141
B6	12	25129.5	94507
B7	12	26810.3	94217.2
B8	12	94554	297574
B9	12	34420.4	95620.4
B10	12	34285.7	94852.6
B11	12	41158.5	100378
B12	12	52503.3	102680
C1	12	33799.5	99748.6
C2	12	39603.6	135336
C3	12	26852.3	99606
C4	12	28746.6	92155.1
C5	12	29681	97173.8
C6	12	27299.2	95471.6
C7	12	27659	96679.4
C8	12	29564	92805.8
C9	12	38379.6	93645.6
C10	12	30908.9	94970.9
C11	12	32390.2	95507.7
C12	12	38268.3	101517
D1	12	39812.4	102410
D2	12	31400.8	105474
D3	12	51049.2	110470
D4	12	34042	97935.6
D5	12	34159.4	102607
D6	12	40582.1	99729.2
D7	12	27125.4	94277.1
D8	12	29376.5	96399.9
D9	12	34403.5	96371.2
D10	12	38148	98144.2
D11	12	39990.1	105943
D12	12	109783	108460
E1	12	42548.6	102729
E2	12	34874.6	98209.1
E3	12	47800.2	106162
E4	12	31995.5	102443
E5	12	31250.3	98103.8
E6	12	115489	108969
E7	12	33703.2	95757.8
E8	12	32087.7	93954.1
E9	12	31767.9	95356.2
E10	12	32007.2	97682.1
E11	12	37014.4	101724
E12	12	43864.6	105212
F1	12	39884.4	107109
F2	12	34107.9	102821
F3	12	31964.8	109923
F4	12	31744.8	106024
F5	12	33925.6	108215
F6	12	45601.8	106939
F7	12	27860.2	101799
F8	12	30622	98161.7
F9	12	30451.6	97007.2
F10	12	29846.1	101891
F11	12	31600.7	105987
F12	12	46825.7	103935
G1	12	37644.8	112183
G2	12	46001	112265
G3	12	34626.9	108672
G4	12	31525.2	107136
G5	12	30016.8	105825
G6	12	30968.6	105144
G7	12	28615.4	95332.7
G8	12	32833.1	105780
G9	12	45219.7	106310
G10	12	37946.4	103323
G11	12	58411.1	113578
G12	12	41407.8	120098
H1	12	50115	115865
H2	12	38280.1	113478
H3	12	32364.4	112317
H4	12	30868	105616
H5	12	32535.8	106536
H6	12	39146.9	148009
H7	12
H8	12
H9	12
H10	12
H11	12
H12	12
A1	13	15584.6	67674.1
A2	13	30150.4	93562.1
A3	13	27974.6	93956.5
A4	13	30251.9	87782.9
A5	13	29910.6	91886.2
A6	13	39351.1	93452.2
A7	13	31933.2	89190.4
A8	13	149106	290204
A9	13	34018.5	96492.3
A10	13	29557.9	90883.3
A11	13	28176.5	95795.4
A12	13	31496.9	91820
B1	13	28530.3	93193.5
B2	13	33087.8	99009.2
B3	13	28247.5	97425.9
B4	13	28775.4	94874.6
B5	13	31787.3	109186
B6	13	25316	94784.5
B7	13	26828.2	94063
B8	13	95195.7	297754
B9	13	34475.7	95538
B10	13	34532.8	94852.1
B11	13	41319.9	100018
B12	13	51965.6	102935
C1	13	34077.2	99859.2
C2	13	39233	135870
C3	13	27057.9	99246.6
C4	13	28723.9	92275
C5	13	29638.3	97001.3
C6	13	27197.7	95107.9
C7	13	27689.5	96762.6
C8	13	29461.9	92830.3
C9	13	38481.4	93817.9
C10	13	31088.7	94953.8
C11	13	32466.3	95489.2
C12	13	37797.6	101736
D1	13	39853.8	102587
D2	13	31012.2	105633
D3	13	50774	110571
D4	13	34438.5	97785
D5	13	34221.4	102538
D6	13	40334.2	99634.6
D7	13	27451.1	94230.1
D8	13	29265.4	96232.4
D9	13	34621.1	96382.6
D10	13	38280.1	98116.9
D11	13	40020.3	106065
D12	13	110734	108649
E1	13	42686.3	103092
E2	13	34819.6	98320.3
E3	13	47939.3	106226
E4	13	31924.6	102455
E5	13	31303	98019.9
E6	13	115487	108978
E7	13	34054.4	95799.3
E8	13	32517.8	94136.9
E9	13	31789.1	95337.9
E10	13	32117.5	97558.5
E11	13	36864.2	102212
E12	13	43912	104998
F1	13	40091.9	107183
F2	13	34398.5	103079
F3	13	31726	109487
F4	13	31743.9	105692
F5	13	34055.4	108403
F6	13	45364.8	107071
F7	13	27917.7	101735
F8	13	30826	97924.4
F9	13	30478.6	96993.6
F10	13	29916.6	101890
F11	13	31608.6	105579
F12	13	47096.5	103901
G1	13	37687.8	112116
G2	13	46101	112507
G3	13	35223.4	108698
G4	13	31193.3	107460
G5	13	30328.9	105430
G6	13	31006.9	105347
G7	13	28572.9	95196.3
G8	13	32717.2	106039
G9	13	45511.3	106366
G10	13	37866.2	103655
G11	13	58669.4	113333
G12	13	41376.1	119976
H1	13	50194.7	116455
H2	13	38029.1	113355
H3	13	32402.7	112104
H4	13	30636.3	105631
H5	13	32245.8	106600
H6	13	39177.1	148178
H7	13
H8	13
H9	13
H10	13
H11	13
H12	13
A1	14	15983.7	67519.7
A2	14	30139.7	93244.7
A3	14	27854.1	93963.2
A4	14	29608.2	88155.6
A5	14	29843.3	92133
A6	14	39665	93739
A7	14	31864	89342.8
A8	14	149290	290180
A9	14	34076.6	96294
A10	14	29339.4	90953.6
A11	14	28494.3	95655.9
A12	14	31282.3	91681.8
B1	14	29118.1	92687
B2	14	32891.6	98951.6
B3	14	28852.9	97801.3
B4	14	28671.3	94520.2
B5	14	32061.3	108849
B6	14	25284.6	94872.6
B7	14	26798.4	94157.7
B8	14	95474.5	297905
B9	14	34666.1	95444.9
B10	14	34491.3	95170.4
B11	14	41760.9	100539
B12	14	52853.3	102427
C1	14	33826.2	99775.8
C2	14	39701.9	135534
C3	14	26824.3	99712.1
C4	14	28893.8	92197.9
C5	14	29823.7	96980.5
C6	14	27252	95316.9
C7	14	27571.7	96786.8
C8	14	29772.1	92829.1
C9	14	38667.7	93540.5
C10	14	30849.8	94730.6
C11	14	32499.3	95619.5
C12	14	38040.9	102105
D1	14	39895.5	102401
D2	14	31349.1	105376
D3	14	51199.7	110483
D4	14	34170.2	98141.7
D5	14	34309.4	102725
D6	14	40287.7	99643.4
D7	14	27494.4	94240.8
D8	14	29432.9	96454.1
D9	14	34521.3	96629.4
D10	14	38606.5	97871.3
D11	14	39962.4	106007
D12	14	110962	109001
E1	14	42582.7	102902
E2	14	34762.8	98234.1
E3	14	47967.6	106075
E4	14	31968.4	102628
E5	14	31219.8	97971.5
E6	14	115425	108905
E7	14	34461.7	95824.9
E8	14	32226.5	94118
E9	14	31877.2	95304
E10	14	32187.8	97941
E11	14	37055.5	102527
E12	14	44197.5	104869
F1	14	39866.5	107177
F2	14	34266.8	103019
F3	14	32185.9	109347
F4	14	31857.4	105795
F5	14	34110.9	108299
F6	14	45370.7	106822
F7	14	27967.5	101556
F8	14	30681	98095.4
F9	14	30532.9	96756.3
F10	14	29720.7	101742
F11	14	31610.7	105679
F12	14	47218.7	103963
G1	14	37444	112380
G2	14	46203	112516
G3	14	35198.4	108575
G4	14	31618.6	107278
G5	14	30204.6	105502
G6	14	30883.7	105603
G7	14	28608.9	95140.9
G8	14	32924.4	106039
G9	14	45455.4	106676
G10	14	37687.2	103593
G11	14	58516.4	113552
G12	14	41319.3	119995
H1	14	49809	116377
H2	14	38134.9	113454
H3	14	32385.7	112090
H4	14	30737	105500
H5	14	32603.6	106818
H6	14	39352.2	148075
H7	14
H8	14
H9	14
H10	14
H11	14
H12	14
A1	15	16017.4	67690
A2	15	31351.8	92864.9
A3	15	28234.1	93995.5
A4	15	30416.3	87408.2
A5	15	30109.3	91667.7
A6	15	39726.2	93668.3
A7	15	32341.5	89279.5
A8	15	149603	290798
A9	15	33811.1	95828.6
A10	15	29303.9	90868.5
A11	15	27987.4	95701.2
A12	15	31803.6	91843.9
B1	15	28356.6	92761.9
B2	15	32676.4	99254.6
B3	15	28758.6	97754.2
B4	15	28726.8	94532.8
B5	15	31908.9	109337
B6	15	25171.7	95219.7
B7	15	27127.7	94287.5
B8	15	96057	298864
B9	15	34519.2	95638.9
B10	15	34805.6	95002.1
B11	15	41588.3	100649
B12	15	52500.4	102339
C1	15	33783.7	100001
C2	15	39384.4	136148
C3	15	27321.2	99644.2
C4	15	28790.4	92337.8
C5	15	29989.7	97229.9
C6	15	27537	95632
C7	15	27855	96855.3
C8	15	29542.6	92918.1
C9	15	38610.1	93900.7
C10	15	31027.3	95102
C11	15	32643.8	95205.5
C12	15	38337.4	101809
D1	15	39888.2	102822
D2	15	31142.4	105984
D3	15	50943.9	110491
D4	15	34390.3	98395.2
D5	15	34320.5	102885
D6	15	40477.4	99663.7
D7	15	27413.1	94510.8
D8	15	28959.5	96257.6
D9	15	34293.9	96460.6
D10	15	38499.7	98111.9
D11	15	39839.6	106541
D12	15	110837	108680
E1	15	42842.3	102887
E2	15	34938.3	98457.3
E3	15	47827.2	106254
E4	15	32010.9	102943
E5	15	31111.3	98096
E6	15	115210	109266
E7	15	34362.5	95800.8
E8	15	32796.6	94304.7
E9	15	32241.5	95649
E10	15	32446.8	97628.6
E11	15	37625.4	102235
E12	15	44184.3	105327
F1	15	40113.7	107298
F2	15	34561.6	102754
F3	15	32101.4	109323
F4	15	31538.6	105967
F5	15	34277	108435
F6	15	45560.5	107063
F7	15	27961.3	101778
F8	15	30876.8	98252.3
F9	15	30651.8	97306.4
F10	15	29729.2	101976
F11	15	32013.6	105537
F12	15	47058.4	103804
G1	15	37691.5	112018
G2	15	46279.5	112621
G3	15	34782	108900
G4	15	31139.8	107386
G5	15	30205.6	105753
G6	15	30831.2	105676
G7	15	28611.4	95492.4
G8	15	33025.3	105946
G9	15	45406.1	106649
G10	15	37557.5	103531
G11	15	58319.4	113004
G12	15	41489.5	119873
H1	15	49851.1	116355
H2	15	37832.5	113465
H3	15	32206.1	112085
H4	15	30638.5	105715
H5	15	32519.2	106631
H6	15	39434.4	147761
H7	15
H8	15
H9	15
H10	15
H11	15
H12	15
A1	16	16335.3	67403.2
A2	16	31072.6	93376.3
A3	16	28834.5	93946.1
A4	16	30341.9	87937.6
A5	16	30054.5	91818.3
A6	16	40109.1	93711.6
A7	16	31966.4	89237.5
A8	16	150424	289945
A9	16	33843.9	96005.2
A10	16	29654.1	90848.6
A11	16	27939.9	95709.4
A12	16	31575.7	91784.6
B1	16	28690.4	92440.7
B2	16	32786.3	99290
B3	16	28639.3	97755
B4	16	29044.3	94796.3
B5	16	32026.3	109106
B6	16	25037.2	94874.2
B7	16	27059.6	94140.9
B8	16	96162.6	297211
B9	16	34560.4	95712.8
B10	16	34726.8	95036.2
B11	16	41584.5	100411
B12	16	52540.1	102520
C1	16	33684.8	100171
C2	16	39909.6	135789
C3	16	27496.3	99568.1
C4	16	28972	92190.5
C5	16	29755.4	97152.3
C6	16	27648.7	95548.1
C7	16	27757.2	96659.3
C8	16	29512.1	92876.6
C9	16	38632.5	93666.9
C10	16	31400.3	95012.6
C11	16	32352.9	95427.7
C12	16	38419.4	101885
D1	16	39932.9	102790
D2	16	31258.6	105526
D3	16	51397.2	110382
D4	16	34559.1	98048.4
D5	16	34220	102635
D6	16	40572.8	99768.4
D7	16	27455.9	94267.8
D8	16	29202.4	96460.8
D9	16	34537.6	96610.8
D10	16	38346.4	98174.6
D11	16	40027.1	106030
D12	16	111209	108506
E1	16	42752.2	103314
E2	16	35091.7	98417.9
E3	16	48258.8	106564
E4	16	32222.3	102620
E5	16	31374.2	98300.9
E6	16	114911	108933
E7	16	35058.4	95719.4
E8	16	33462.8	94097
E9	16	32933.3	95320.1
E10	16	32366.3	97808.5
E11	16	37386.6	101835
E12	16	44519.3	105174
F1	16	39992.1	107676
F2	16	34330.1	102983
F3	16	32119.3	109746
F4	16	32098.6	105924
F5	16	33987	108374
F6	16	45640	107196
F7	16	28228.6	101906
F8	16	30772.3	98133.1
F9	16	30355	97101.8
F10	16	30070.7	102039
F11	16	32097.4	105535
F12	16	47454.2	103885
G1	16	37547.8	112485
G2	16	46261.9	112880
G3	16	35243.4	108998
G4	16	31509.4	107285
G5	16	30489.3	105792
G6	16	30841.7	105717
G7	16	28530.3	95106.4
G8	16	32713.1	106099
G9	16	45231.5	106632
G10	16	37879.1	103578
G11	16	58674.7	113474
G12	16	41004.7	120238
H1	16	49650.7	116089
H2	16	38292.4	113792
H3	16	32287.1	112261
H4	16	30583.7	105865
H5	16	32510.7	106538
H6	16	39300.9	148024
H7	16
H8	16
H9	16
H10	16
H11	16
H12	16
A1	17	16897.1	67579.4
A2	17	32055.6	93281.9
A3	17	29931.2	94185.5
A4	17	30314.5	87320.2
A5	17	29994.1	92117.9
A6	17	39834.5	93923.4
A7	17	31986.5	89148.2
A8	17	149919	290159
A9	17	34158.9	96286.2
A10	17	29612.1	91258.3
A11	17	27978.9	95844.8
A12	17	31283.5	91668.4
B1	17	28986.5	93176.2
B2	17	32643.7	99193.3
B3	17	28273.9	97853.8
B4	17	28893.1	94975.2
B5	17	31988.6	109205
B6	17	25369.8	94940.2
B7	17	27163.9	94165.2
B8	17	95918.9	298338
B9	17	34847.8	95649.9
B10	17	35006.1	94887.3
B11	17	41786.1	100389
B12	17	52600.4	102485
C1	17	34116.5	99932.1
C2	17	40053.4	135750
C3	17	27657	99886.8
C4	17	29586.3	92077.3
C5	17	30107.6	96822
C6	17	28078.3	95549
C7	17	28042.2	97188.4
C8	17	29630.4	93054.5
C9	17	38691.1	94140.8
C10	17	31579.9	95166.1
C11	17	32592.2	95532.3
C12	17	38167.3	101712
D1	17	39913.4	102551
D2	17	31201.8	105585
D3	17	51115.4	110477
D4	17	34338.2	98272.8
D5	17	34543.5	102588
D6	17	40716.1	99680.1
D7	17	27329.9	94286.8
D8	17	29182.7	96538.1
D9	17	34413.7	96750.7
D10	17	38446.1	98068.8
D11	17	40240.5	106128
D12	17	111859	108367
E1	17	42691.6	103343
E2	17	35085.4	98086.1
E3	17	47918.4	106268
E4	17	31946.9	102791
E5	17	31419.6	98117.9
E6	17	115442	109191
E7	17	36090	95817.3
E8	17	34649.1	94322.8
E9	17	34637	95294.6
E10	17	33031.3	97785.6
E11	17	37736.7	102406
E12	17	44450.4	104715
F1	17	40566.6	107152
F2	17	34438.1	102871
F3	17	32182.3	109509
F4	17	32099.1	106053
F5	17	34493	108465
F6	17	45668.1	107299
F7	17	28043	101698
F8	17	30864.9	98201.5
F9	17	30483.7	97041.3
F10	17	30382.9	102093
F11	17	32150.2	105593
F12	17	47258.1	103819
G1	17	37619.3	112098
G2	17	46544.3	112790
G3	17	35673.6	108931
G4	17	31532.3	107336
G5	17	30223	105624
G6	17	30944.4	105418
G7	17	28670.1	95307
G8	17	32901.6	105793
G9	17	45342.6	106733
G10	17	37745.7	103799
G11	17	58574.3	113397
G12	17	41194.6	119903
H1	17	49503.9	115856
H2	17	38020.2	113523
H3	17	32419.4	112096
H4	17	30833	105470
H5	17	32290.8	106632
H6	17	39417.2	148236
H7	17
H8	17
H9	17
H10	17
H11	17
H12	17
A1	18	18197.3	66929.3
A2	18	34167	93457.1
A3	18	31912.9	94418.2
A4	18	30229	87877.4
A5	18	30099.4	92086.4
A6	18	39844.1	93699.1
A7	18	31989.5	89528.5
A8	18	150216	289574
A9	18	33825.6	96409.7
A10	18	29621.1	91232.9
A11	18	28519.3	95873
A12	18	31462.8	91451.8
B1	18	29351.4	92657.8
B2	18	32951.6	99028.6
B3	18	28356.5	97756.7
B4	18	29237.5	94943.3
B5	18	31977.7	109332
B6	18	25224.5	94894
B7	18	27209.5	93999.7
B8	18	97650.1	299428
B9	18	35272.3	95784.6
B10	18	35491.9	94865.2
B11	18	42678.9	100269
B12	18	53182	101920
C1	18	34368.1	99994.1
C2	18	40206.8	135637
C3	18	27653.4	100062
C4	18	29683	92657.8
C5	18	30934.1	97220.8
C6	18	28254.2	95636.8
C7	18	28142	96999.6
C8	18	29878.4	92587.8
C9	18	38893	93901
C10	18	32070.3	95060.3
C11	18	32976.3	95373.7
C12	18	39091.4	101837
D1	18	40026	102637
D2	18	31333.2	106058
D3	18	51047.7	110614
D4	18	34754.4	98352.7
D5	18	34380	102712
D6	18	40981.6	99748.4
D7	18	27288.9	94442.3
D8	18	29160.5	96887.6
D9	18	34282.9	96736.3
D10	18	38894.4	98207.8
D11	18	40673.6	106272
D12	18	112191	108606
E1	18	42657.8	103113
E2	18	35254.9	98359.7
E3	18	48180	106447
E4	18	32425.3	102776
E5	18	31602.6	98165.9
E6	18	115217	109019
E7	18	38222	95793.9
E8	18	37357	94263.7
E9	18	37244.1	95702.2
E10	18	33051	97914.3
E11	18	38677	102435
E12	18	45272.8	105056
F1	18	40483.8	107165
F2	18	34922.4	103170
F3	18	32367.1	109983
F4	18	32120.5	106350
F5	18	34659.9	108488
F6	18	45939.4	107172
F7	18	28256.6	101758
F8	18	31023.5	98118
F9	18	30679.3	96899.9
F10	18	30598.1	102018
F11	18	32812	105960
F12	18	48259.9	103682
G1	18	37929.4	112052
G2	18	47110.3	112422
G3	18	35838.6	108995
G4	18	31456.8	107498
G5	18	30178	105817
G6	18	30948.5	105626
G7	18	28540.5	95533
G8	18	32882.5	106091
G9	18	45538.6	106682
G10	18	37884.2	103489
G11	18	59008.6	113414
G12	18	41348.1	120130
H1	18	49485	115778
H2	18	38058.9	113624
H3	18	32265.2	111883
H4	18	30592.5	105675
H5	18	32410.2	106623
H6	18	39303.6	148121
H7	18
H8	18
H9	18
H10	18
H11	18
H12	18
A1	19	19935.5	67567.8
A2	19	38115.5	93377
A3	19	35506.5	93839.2
A4	19	30108.6	87889.2
A5	19	30408.3	92048.3
A6	19	40066.5	93772.7
A7	19	32122.2	89445.5
A8	19	150988	290058
A9	19	33878.2	95968.3
A10	19	29630	91369.5
A11	19	28025.3	95769
A12	19	31431.9	91784
B1	19	29088.6	92690.8
B2	19	33186	99204.2
B3	19	28699	97924.7
B4	19	28899.5	95059.7
B5	19	32272.8	108934
B6	19	25447.2	95002.8
B7	19	28001.1	94260.8
B8	19	99129.5	299343
B9	19	35784.8	95805.3
B10	19	36739.7	94851.3
B11	19	43496.2	100682
B12	19	54826.6	102531
C1	19	34322.4	99975.3
C2	19	41053.8	136148
C3	19	28383	99857
C4	19	30784.2	92227.7
C5	19	31650.4	97143.2
C6	19	29248.6	96123.9
C7	19	28325.3	97120.9
C8	19	30189.9	92934.7
C9	19	39147.7	94247
C10	19	32772.1	94918.8
C11	19	33883.4	95135
C12	19	39448.6	101772
D1	19	39820.7	102606
D2	19	31149.3	105654
D3	19	51264.7	110365
D4	19	34864.3	97935
D5	19	35031.1	102576
D6	19	41094.4	99676.9
D7	19	27575.6	94405.3
D8	19	29418.3	96527.7
D9	19	34441.8	96821.8
D10	19	39019.8	97735.3
D11	19	41167.9	106267
D12	19	112978	108637
E1	19	43289	103273
E2	19	34979.7	98627.4
E3	19	48392.7	106733
E4	19	32239.3	102924
E5	19	31555	98244.5
E6	19	115311	109431
E7	19	42610	96072.4
E8	19	42199.9	94164.9
E9	19	42870	95521.4
E10	19	34028.2	97892.1
E11	19	39491.9	102332
E12	19	46569.4	105078
F1	19	40505.3	107540
F2	19	34955.4	103271
F3	19	32634.4	109692
F4	19	32698.3	106055
F5	19	35272.4	108606
F6	19	46380.1	107309
F7	19	28186.7	101573
F8	19	31183.6	98468.8
F9	19	30996.1	97073.2
F10	19	31664.4	101919
F11	19	33530.7	106127
F12	19	48673.8	103859
G1	19	39474	112412
G2	19	48010.3	112833
G3	19	36731.1	109040
G4	19	31485.5	107487
G5	19	30063.2	105760
G6	19	31009.1	105596
G7	19	28651.9	95254.6
G8	19	32590	105938
G9	19	45306.5	106756
G10	19	37872.3	103565
G11	19	59065.2	113692
G12	19	41073.4	120010
H1	19	50183.7	115930
H2	19	37563	113547
H3	19	32182.4	111957
H4	19	30829.8	105775
H5	19	32430	106585
H6	19	39498.7	147790
H7	19
H8	19
H9	19
H10	19
H11	19
H12	19
A1	20	24029.8	67548.2
A2	20	44888.9	93010.7
A3	20	41618.2	94337.5
A4	20	30088.9	87785.9
A5	20	30311.7	91906.7
A6	20	39831.4	94196
A7	20	32169.9	88795.2
A8	20	151221	289331
A9	20	34047.1	96247.8
A10	20	29488.8	91100.3
A11	20	28477	95878.5
A12	20	31808.6	91196.9
B1	20	28850.6	92692.5
B2	20	33071.9	99061.8
B3	20	28483.9	97913.8
B4	20	29735.2	94821.1
B5	20	32529.5	109101
B6	20	25625	94843.2
B7	20	29212.4	94209.8
B8	20	103506	299154
B9	20	36840.1	95854.8
B10	20	38387.1	95161.4
B11	20	45548	100624
B12	20	56210.2	102276
C1	20	35979.6	100142
C2	20	42055.9	136018
C3	20	29934.8	99903.1
C4	20	32527.6	92267
C5	20	32957.1	96895.6
C6	20	30829.8	95885.7
C7	20	28713.4	96702.4
C8	20	30610.8	92722.5
C9	20	39601.9	94005.3
C10	20	34124.3	95225.2
C11	20	35682.9	95444.9
C12	20	41075.4	101854
D1	20	40432.8	102724
D2	20	31264	105771
D3	20	51710.4	110836
D4	20	35175.2	98436.4
D5	20	35664.7	102909
D6	20	41849.7	99835.7
D7	20	27561.4	94301.5
D8	20	29266.8	96446.4
D9	20	34651.4	96681.2
D10	20	40045.1	98333
D11	20	42255.8	106221
D12	20	114258	108280
E1	20	43281.3	103194
E2	20	35340	98465
E3	20	48322.2	106421
E4	20	32673.9	102810
E5	20	31822.3	98156.9
E6	20	115291	108904
E7	20	50708.6	96293.5
E8	20	51061	94414.1
E9	20	52794.9	95524.2
E10	20	35754	97610.4
E11	20	41871.9	102028
E12	20	48732.6	104966
F1	20	41005.7	107147
F2	20	35664.3	103186
F3	20	33670.7	110024
F4	20	33404.6	105833
F5	20	36438.9	108343
F6	20	47097	107188
F7	20	28761.4	101733
F8	20	31487.2	98055.7
F9	20	31456.1	97411.6
F10	20	33468.5	101917
F11	20	35412.3	105693
F12	20	50743.4	104004
G1	20	40048.5	112567
G2	20	49573.3	112557
G3	20	38192	108931
G4	20	31494.7	107680
G5	20	30192.7	105963
G6	20	31223.5	105721
G7	20	28671.5	95346
G8	20	32964.4	105805
G9	20	45228.2	107045
G10	20	37758.1	103685
G11	20	58887.5	113826
G12	20	41001.3	119895
H1	20	50445.9	116346
H2	20	38246.8	113412
H3	20	32222.4	111831
H4	20	30787.8	105667
H5	20	32659.4	106630
H6	20	39603.2	148031
H7	20
H8	20
H9	20
H10	20
H11	20
H12	20
A1	21	30951.4	67164.2
A2	21	58048.7	93060.9
A3	21	54217.5	93689.4
A4	21	30770.2	87980.7
A5	21	30014.2	92235.9
A6	21	39689.2	94002.4
A7	21	32003.2	89320.8
A8	21	149059	288973
A9	21	33873.2	95956.1
A10	21	29742.7	91001
A11	21	28145.1	96217.3
A12	21	31617.2	91577.1
B1	21	29355	93148
B2	21	32657.4	99126.6
B3	21	28391.9	97965.4
B4	21	29557.3	94894.4
B5	21	32630.2	109113
B6	21	26055.2	94939.6
B7	21	31399	94357.3
B8	21	109669	299701
B9	21	39027.8	95915.3
B10	21	41737.6	94901.8
B11	21	48636.6	100154
B12	21	59676.6	102569
C1	21	37543.4	99997.8
C2	21	44213	135981
C3	21	31401.5	99963.8
C4	21	35550.6	92542.6
C5	21	36430.2	97480.3
C6	21	33741.7	95897.4
C7	21	29870.1	97279.8
C8	21	31568.4	92851.2
C9	21	40439.8	93864.4
C10	21	36437.7	95233.2
C11	21	38298	95502.9
C12	21	44624.5	101966
D1	21	40207.5	102832
D2	21	31800.1	105974
D3	21	51629.2	110809
D4	21	36578.4	98550
D5	21	36868.2	102912
D6	21	43325	99937.7
D7	21	27889.9	94600.7
D8	21	29632.3	96861.1
D9	21	34691.8	96834.1
D10	21	41598.4	98381.1
D11	21	44332.9	106361
D12	21	116579	108785
E1	21	44127.9	102964
E2	21	36304.1	98433.4
E3	21	49432.4	106524
E4	21	32989.9	102762
E5	21	32059.3	97950.9
E6	21	115783	109396
E7	21	65503.2	95897
E8	21	67681.8	94110.3
E9	21	71173.3	95549.3
E10	21	38551.9	98056.3
E11	21	45800.2	101945
E12	21	52673	104873
F1	21	41871.8	107217
F2	21	36725.3	103407
F3	21	35493	109790
F4	21	35201.2	106101
F5	21	38392	108916
F6	21	48472	107403
F7	21	29616.4	102202
F8	21	32187.4	98522.8
F9	21	31900.9	97240.5
F10	21	36148.9	102062
F11	21	38594	105711
F12	21	53801.2	103990
G1	21	43627.2	112042
[truncated: 10,487 more rows]

## Sheet: Amplification Data
Block Type	96alum
Chemistry	SYBR_GREEN
Experiment File Name	D:\ShuJu\LZM\spx1-5 zuzhi chyi biaoda.eds
Experiment Run End Time	2023-07-13 07:21:08 AM CST
Instrument Type	sds7500
Passive Reference	ROX
Well	Cycle	Target Name	Rn	ΔRn
A1	1	SPX1	0.230195	0.00297267
A1	2	SPX1	0.21841	-0.00945435
A1	3	SPX1	0.228212	-0.000294739
A1	4	SPX1	0.229309	0.000159957
A1	5	SPX1	0.229172	-0.000618285
A1	6	SPX1	0.233536	0.00310327
A1	7	SPX1	0.233028	0.0019534
A1	8	SPX1	0.232095	0.000377742
A1	9	SPX1	0.233567	0.00120787
A1	10	SPX1	0.229357	-0.00364403
A1	11	SPX1	0.234034	0.00039074
A1	12	SPX1	0.229214	-0.00507095
A1	13	SPX1	0.23029	-0.00463779
A1	14	SPX1	0.236726	0.00115665
A1	15	SPX1	0.236629	0.00041727
A1	16	SPX1	0.242352	0.00549889
A1	17	SPX1	0.250033	0.012537
A1	18	SPX1	0.271889	0.0337514
A1	19	SPX1	0.295045	0.0562654
A1	20	SPX1	0.355743	0.116321
A1	21	SPX1	0.460832	0.220768
A1	22	SPX1	0.623289	0.382583
A1	23	SPX1	0.81683	0.575482
A1	24	SPX1	0.922662	0.680672
A1	25	SPX1	0.966369	0.723736
A1	26	SPX1	1.05452	0.811249
A1	27	SPX1	1.15298	0.909064
A1	28	SPX1	1.24819	1.00363
A1	29	SPX1	1.33136	1.08616
A1	30	SPX1	1.41835	1.17251
A1	31	SPX1	1.47867	1.23218
A1	32	SPX1	1.53314	1.28601
A1	33	SPX1	1.59393	1.34616
A1	34	SPX1	1.64029	1.39187
A1	35	SPX1	1.68839	1.43934
A1	36	SPX1	1.71305	1.46336
A1	37	SPX1	1.76311	1.51277
A1	38	SPX1	1.77595	1.52497
A1	39	SPX1	1.81552	1.5639
A1	40	SPX1	1.8302	1.57794
A2	1	SPX1	0.309166	0.00245194
A2	2	SPX1	0.307704	-0.000536702
A2	3	SPX1	0.310734	0.00096742
A2	4	SPX1	0.311459	0.000165199
A2	5	SPX1	0.315125	0.002305
A2	6	SPX1	0.319105	0.00475833
A2	7	SPX1	0.313202	-0.00267157
A2	8	SPX1	0.314342	-0.00305814
A2	9	SPX1	0.317073	-0.00185374
A2	10	SPX1	0.318003	-0.00245005
A2	11	SPX1	0.322448	0.000468517
A2	12	SPX1	0.321462	-0.00204403
A2	13	SPX1	0.32225	-0.00278241
A2	14	SPX1	0.323233	-0.00332622
A2	15	SPX1	0.337607	0.00952168
A2	16	SPX1	0.332767	0.0031554
A2	17	SPX1	0.343643	0.0125042
A2	18	SPX1	0.36559	0.0329247
A2	19	SPX1	0.40819	0.0739979
A2	20	SPX1	0.48262	0.146902
A2	21	SPX1	0.623771	0.286526
A2	22	SPX1	0.837167	0.498395
A2	23	SPX1	1.11201	0.77171
A2	24	SPX1	1.25839	0.916569
A2	25	SPX1	1.31955	0.9762
A2	26	SPX1	1.44108	1.09621
A2	27	SPX1	1.57094	1.22453
A2	28	SPX1	1.71884	1.37091
A2	29	SPX1	1.8204	1.47094
A2	30	SPX1	1.92388	1.5729
A2	31	SPX1	2.01488	1.66237
A2	32	SPX1	2.1017	1.74767
A2	33	SPX1	2.18472	1.82915
A2	34	SPX1	2.26652	1.90943
A2	35	SPX1	2.31173	1.95311
A2	36	SPX1	2.34805	1.9879
A2	37	SPX1	2.39141	2.02974
A2	38	SPX1	2.44516	2.08196
A2	39	SPX1	2.48756	2.12284
A2	40	SPX1	2.49959	2.13334
A3	1	SPX1	0.285828	-0.0076944
A3	2	SPX1	0.290382	-0.00351575
A3	3	SPX1	0.293519	-0.000753102
A3	4	SPX1	0.294475	-0.000171803
A3	5	SPX1	0.296296	0.00127397
A3	6	SPX1	0.295029	-0.000367475
A3	7	SPX1	0.296284	0.000512533
A3	8	SPX1	0.294453	-0.00169248
A3	9	SPX1	0.297469	0.000948819
A3	10	SPX1	0.297754	0.000859059
A3	11	SPX1	0.298981	0.00171067
A3	12	SPX1	0.295954	-0.00169067
A3	13	SPX1	0.29774	-0.000279464
A3	14	SPX1	0.296436	-0.00195825
A3	15	SPX1	0.300377	0.00160819
A3	16	SPX1	0.306926	0.00778238
A3	17	SPX1	0.31779	0.0182713
A3	18	SPX1	0.337995	0.0381013
A3	19	SPX1	0.378376	0.078108
A3	20	SPX1	0.441163	0.14052
A3	21	SPX1	0.578695	0.277677
A3	22	SPX1	0.77731	0.475917
A3	23	SPX1	1.05779	0.756021
A3	24	SPX1	1.24392	0.94178
A3	25	SPX1	1.29841	0.995895
A3	26	SPX1	1.42423	1.12134
A3	27	SPX1	1.5443	1.24104
A3	28	SPX1	1.68796	1.38432
A3	29	SPX1	1.79342	1.4894
A3	30	SPX1	1.9055	1.60111
A3	31	SPX1	2.01614	1.71137
A3	32	SPX1	2.08139	1.77625
A3	33	SPX1	2.17203	1.86651
A3	34	SPX1	2.23376	1.92787
A3	35	SPX1	2.30092	1.99466
A3	36	SPX1	2.35234	2.0457
A3	37	SPX1	2.38219	2.07518
A3	38	SPX1	2.42109	2.1137
A3	39	SPX1	2.46094	2.15318
A3	40	SPX1	2.48372	2.17558
A4	1	SPX1	0.328587	-0.00748339
A4	2	SPX1	0.330373	-0.00628856
A4	3	SPX1	0.334532	-0.00271974
A4	4	SPX1	0.340522	0.00267916
A4	5	SPX1	0.341603	0.00316901
A4	6	SPX1	0.337711	-0.00131362
A4	7	SPX1	0.337339	-0.00227615
A4	8	SPX1	0.3412	0.000994352
A4	9	SPX1	0.341764	0.000966779
A4	10	SPX1	0.340719	-0.000668509
A4	11	SPX1	0.339916	-0.00206282
A4	12	SPX1	0.348165	0.00559548
A4	13	SPX1	0.344622	0.00146183
A4	14	SPX1	0.335863	-0.00788814
A4	15	SPX1	0.347979	0.00363772
A4	16	SPX1	0.345039	0.000106408
A4	17	SPX1	0.347165	0.00164149
A4	18	SPX1	0.343991	-0.00212314
A4	19	SPX1	0.342575	-0.00412974
A4	20	SPX1	0.342753	-0.0045423
A4	21	SPX1	0.349738	0.00185116
A4	22	SPX1	0.350858	0.00238095
A4	23	SPX1	0.352308	0.00323982
A4	24	SPX1	0.360132	0.0104725
A4	25	SPX1	0.378542	0.0282922
A4	26	SPX1	0.406155	0.0553144
A4	27	SPX1	0.468045	0.116614
A4	28	SPX1	0.57566	0.223637
A4	29	SPX1	0.743113	0.3905
A4	30	SPX1	0.961258	0.608054
A4	31	SPX1	1.10137	0.747575
A4	32	SPX1	1.15758	0.803194
A4	33	SPX1	1.2754	0.92042
A4	34	SPX1	1.37984	1.02428
A4	35	SPX1	1.50791	1.15175
A4	36	SPX1	1.59813	1.24138
A4	37	SPX1	1.70064	1.3433
A4	38	SPX1	1.78899	1.43106
A4	39	SPX1	1.88891	1.53039
A4	40	SPX1	1.94965	1.59054
A5	1	SPX1	0.32088	-0.00512779
A5	2	SPX1	0.321029	-0.00513361
A5	3	SPX1	0.32619	-0.000128043
A5	4	SPX1	0.326482	9.1615e-06
A5	5	SPX1	0.329527	0.00289933
A5	6	SPX1	0.324497	-0.0022853
A5	7	SPX1	0.330229	0.00329148
A5	8	SPX1	0.328251	0.00115829
A5	9	SPX1	0.327671	0.000423594
A5	10	SPX1	0.329415	0.00201226
A5	11	SPX1	0.327789	0.000231448
A5	12	SPX1	0.325149	-0.00256327
A5	13	SPX1	0.325517	-0.00235052
A5	14	SPX1	0.323915	-0.00410764
A5	15	SPX1	0.328462	0.000284056
A5	16	SPX1	0.327326	-0.00100705
A5	17	SPX1	0.325605	-0.0028826
A5	18	SPX1	0.32686	-0.00178251
A5	19	SPX1	0.330352	0.00155388
A5	20	SPX1	0.329809	0.000856441
A5	21	SPX1	0.325406	-0.00370129
A5	22	SPX1	0.331679	0.00241661
A5	23	SPX1	0.335089	0.00567167
A5	24	SPX1	0.342284	0.0127115
A5	25	SPX1	0.360364	0.0306365
A5	26	SPX1	0.386063	0.0561807
A5	27	SPX1	0.442629	0.112592
A5	28	SPX1	0.543019	0.212826
A5	29	SPX1	0.71264	0.382293
A5	30	SPX1	0.950573	0.62007
A5	31	SPX1	1.1769	0.846242
A5	32	SPX1	1.25493	0.92412
A5	33	SPX1	1.37063	1.03966
A5	34	SPX1	1.49279	1.16167
A5	35	SPX1	1.63572	1.30444
A5	36	SPX1	1.73606	1.40462
A5	37	SPX1	1.85437	1.52278
A5	38	SPX1	1.95784	1.62609
A5	39	SPX1	2.05207	1.72018
A5	40	SPX1	2.12667	1.79462
A6	1	SPX1	0.417696	-0.00211112
A6	2	SPX1	0.420058	-9.06077e-05
A6	3	SPX1	0.41742	-0.00307137
A6	4	SPX1	0.424901	0.00406862
A6	5	SPX1	0.420236	-0.000938939
A6	6	SPX1	0.423033	0.0015163
A6	7	SPX1	0.422028	0.000169722
A6	8	SPX1	0.422494	0.00029323
A6	9	SPX1	0.426165	0.00362248
A6	10	SPX1	0.421639	-0.00124587
A6	11	SPX1	0.423953	0.000726577
A6	12	SPX1	0.420546	-0.00302201
A6	13	SPX1	0.421082	-0.00282796
A6	14	SPX1	0.423144	-0.00110869
A6	15	SPX1	0.424116	-0.000478003
A6	16	SPX1	0.428006	0.0030694
A6	17	SPX1	0.424117	-0.00116154
A6	18	SPX1	0.425234	-0.000385803
A6	19	SPX1	0.427273	0.001311
A6	20	SPX1	0.422856	-0.00344753
A6	21	SPX1	0.422215	-0.00443061
A6	22	SPX1	0.42858	0.00159209
A6	23	SPX1	0.433079	0.00574889
A6	24	SPX1	0.440446	0.0127738
A6	25	SPX1	0.460401	0.0323869
A6	26	SPX1	0.494214	0.0658582
A6	27	SPX1	0.557092	0.128395
A6	28	SPX1	0.674649	0.245609
A6	29	SPX1	0.858536	0.429154
A6	30	SPX1	1.09736	0.667639
A6	31	SPX1	1.26407	0.834008
A6	32	SPX1	1.32617	0.895758
A6	33	SPX1	1.44236	1.01162
A6	34	SPX1	1.5639	1.13281
A6	35	SPX1	1.69884	1.2674
A6	36	SPX1	1.78302	1.35124
A6	37	SPX1	1.886	1.45389
A6	38	SPX1	1.97031	1.53785
A6	39	SPX1	2.05951	1.62671
A6	40	SPX1	2.11933	1.68618
A7	1	SPX1	0.349299	-0.00829344
A7	2	SPX1	0.355176	-0.00254404
A7	3	SPX1	0.359724	0.00187638
A7	4	SPX1	0.359709	0.00173282
A7	5	SPX1	0.357591	-0.000512935
A7	6	SPX1	0.360602	0.00237035
A7	7	SPX1	0.358542	0.000182197
A7	8	SPX1	0.357869	-0.000617939
A7	9	SPX1	0.357758	-0.000857017
A7	10	SPX1	0.359004	0.000260865
A7	11	SPX1	0.357511	-0.00136042
A7	12	SPX1	0.357254	-0.00174493
A7	13	SPX1	0.358034	-0.00109312
A7	14	SPX1	0.356649	-0.00260589
A7	15	SPX1	0.36225	0.00286715
A7	16	SPX1	0.358217	-0.00129406
A7	17	SPX1	0.358801	-0.000837584
A7	18	SPX1	0.35731	-0.00245603
A7	19	SPX1	0.359126	-0.00076836
A7	20	SPX1	0.362294	0.00227156
A7	21	SPX1	0.358294	-0.00185582
A7	22	SPX1	0.357797	-0.00248108
A7	23	SPX1	0.361756	0.00135033
A7	24	SPX1	0.36091	0.000375525
A7	25	SPX1	0.36586	0.00519801
A7	26	SPX1	0.371199	0.0104094
A7	27	SPX1	0.382378	0.0214604
A7	28	SPX1	0.402679	0.0416334
A7	29	SPX1	0.445207	0.084033
A7	30	SPX1	0.5182	0.156898
A7	31	SPX1	0.647806	0.286376
A7	32	SPX1	0.862182	0.500625
A7	33	SPX1	1.11617	0.754488
A7	34	SPX1	1.27812	0.916309
A7	35	SPX1	1.35478	0.992834
A7	36	SPX1	1.44474	1.08267
A7	37	SPX1	1.58552	1.22332
A7	38	SPX1	1.71349	1.35117
A7	39	SPX1	1.84558	1.48313
A7	40	SPX1	1.9366	1.57402
A8	1	SPX1	0.512143	-0.00374522
A8	2	SPX1	0.513248	-0.00281521
A8	3	SPX1	0.516795	0.000557106
A8	4	SPX1	0.518168	0.00175636
A8	5	SPX1	0.517255	0.000668515
A8	6	SPX1	0.519487	0.00272601
A8	7	SPX1	0.516942	6.85147e-06
A8	8	SPX1	0.520356	0.00324589
A8	9	SPX1	0.517793	0.000509326
A8	10	SPX1	0.518416	0.00095714
A8	11	SPX1	0.516186	-0.00144677
A8	12	SPX1	0.51439	-0.00341724
A8	13	SPX1	0.513797	-0.00418482
A8	14	SPX1	0.514474	-0.00368259
A8	15	SPX1	0.514457	-0.00387416
A8	16	SPX1	0.518803	0.000297577
A8	17	SPX1	0.516678	-0.00200149
A8	18	SPX1	0.518748	-0.000106296
A8	19	SPX1	0.520543	0.001514
A8	20	SPX1	0.522657	0.00345419
A8	21	SPX1	0.515824	-0.00355406
A8	22	SPX1	0.520521	0.000968629
A8	23	SPX1	0.518192	-0.001535
A8	24	SPX1	0.524037	0.00413585
A8	25	SPX1	0.52308	0.00300497
A8	26	SPX1	0.529436	0.00918634
A8	27	SPX1	0.54163	0.0212056
A8	28	SPX1	0.564847	0.0442485
A8	29	SPX1	0.607906	0.0871327
A8	30	SPX1	0.690391	0.169443
A8	31	SPX1	0.839987	0.318865
A8	32	SPX1	1.05502	0.533725
A8	33	SPX1	1.3072	0.785729
A8	34	SPX1	1.42604	0.904395
A8	35	SPX1	1.51024	0.988416
A8	36	SPX1	1.61916	1.09716
A8	37	SPX1	1.75078	1.22861
A8	38	SPX1	1.88019	1.35785
A8	39	SPX1	2.00524	1.48272
A8	40	SPX1	2.11005	1.58736
A9	1	SPX1	0.33777	-0.0100105
A9	2	SPX1	0.343064	-0.00512023
A9	3	SPX1	0.344502	-0.00408548
A9	4	SPX1	0.352385	0.00339357
A9	5	SPX1	0.35099	0.00159537
A9	6	SPX1	0.350705	0.000906647
A9	7	SPX1	0.35329	0.00308804
A9	8	SPX1	0.350769	0.000163191
A9	9	SPX1	0.351581	0.000571643
A9	10	SPX1	0.353299	0.00188555
A9	11	SPX1	0.352442	0.000625459
A9	12	SPX1	0.349309	-0.0029109
A9	13	SPX1	0.352552	-7.231e-05
A9	14	SPX1	0.353881	0.000853153
A9	15	SPX1	0.352829	-0.000602202
A9	16	SPX1	0.352522	-0.00131319
A9	17	SPX1	0.354764	0.000525838
A9	18	SPX1	0.350852	-0.00378965
A9	19	SPX1	0.353015	-0.00203115
A9	20	SPX1	0.353745	-0.00170468
A9	21	SPX1	0.353007	-0.00284568
A9	22	SPX1	0.352268	-0.00398835
A9	23	SPX1	0.351973	-0.004687
A9	24	SPX1	0.356217	-0.000846807
A9	25	SPX1	0.361439	0.00397132
A9	26	SPX1	0.369169	0.0112976
A9	27	SPX1	0.373353	0.0150786
A9	28	SPX1	0.403008	0.0443299
A9	29	SPX1	0.441326	0.0822444
A9	30	SPX1	0.517387	0.157901
A9	31	SPX1	0.66141	0.301521
A9	32	SPX1	0.877031	0.516738
A9	33	SPX1	1.13765	0.776955
A9	34	SPX1	1.27321	0.912107
A9	35	SPX1	1.3506	0.989097
A9	36	SPX1	1.45483	1.09292
A9	37	SPX1	1.59275	1.23044
A9	38	SPX1	1.71586	1.35314
A9	39	SPX1	1.84411	1.48099
A9	40	SPX1	1.93711	1.57359
A10	1	SPX1	0.305493	-0.0124091
A10	2	SPX1	0.309228	-0.00913318
A10	3	SPX1	0.313057	-0.00576314
A10	4	SPX1	0.317649	-0.00162963
A10	5	SPX1	0.323664	0.00392668
A10	6	SPX1	0.322268	0.00207118
A10	7	SPX1	0.319486	-0.00116965
A10	8	SPX1	0.321776	0.000662232
A10	9	SPX1	0.328689	0.0071161
A10	10	SPX1	0.31907	-0.00296127
A10	11	SPX1	0.325823	0.00333291
A10	12	SPX1	0.321118	-0.00183148
A10	13	SPX1	0.325229	0.00182091
A10	14	SPX1	0.322576	-0.00129115
A10	15	SPX1	0.322487	-0.00183892
A10	16	SPX1	0.326412	0.00162815
A10	17	SPX1	0.324487	-0.000756188
A10	18	SPX1	0.324675	-0.00102641
A10	19	SPX1	0.324288	-0.00187299
A10	20	SPX1	0.323696	-0.00292335
A10	21	SPX1	0.326839	-0.000239148
A10	22	SPX1	0.326768	-0.00076913
A10	23	SPX1	0.326663	-0.00133276
A10	24	SPX1	0.330191	0.00173684
A10	25	SPX1	0.332024	0.00311019
A10	26	SPX1	0.336731	0.0073593
A10	27	SPX1	0.34699	0.0171589
A10	28	SPX1	0.365062	0.0347722
A10	29	SPX1	0.402442	0.0716934
A10	30	SPX1	0.470046	0.138839
A10	31	SPX1	0.585379	0.253713
A10	32	SPX1	0.788681	0.456556
A10	33	SPX1	1.0437	0.71112
A10	34	SPX1	1.20023	0.867192
A10	35	SPX1	1.26409	0.930592
A10	36	SPX1	1.36585	1.03189
A10	37	SPX1	1.49846	1.16404
A10	38	SPX1	1.6122	1.27732
A10	39	SPX1	1.75211	1.41677
A10	40	SPX1	1.84162	1.50582
A11	1	SPX1	0.285264	-0.0036376
A11	2	SPX1	0.285056	-0.0042055
A11	3	SPX1	0.290063	0.000442336
A11	4	SPX1	0.289384	-0.000597217
A11	5	SPX1	0.290601	0.000260416
A11	6	SPX1	0.291727	0.00102614
A11	7	SPX1	0.293923	0.00286275
A11	8	SPX1	0.290075	-0.00134536
A11	9	SPX1	0.292282	0.000501622
A11	10	SPX1	0.292404	0.000263454
A11	11	SPX1	0.291699	-0.000801252
A11	12	SPX1	0.290855	-0.00200534
A11	13	SPX1	0.294132	0.000911808
A11	14	SPX1	0.297883	0.00430362
A11	15	SPX1	0.292445	-0.00149426
A11	16	SPX1	0.291924	-0.00237553
A11	17	SPX1	0.291918	-0.00274108
A11	18	SPX1	0.29747	0.00245071
A11	19	SPX1	0.292634	-0.00274487
A11	20	SPX1	0.297011	0.00127229
A11	21	SPX1	0.292516	-0.00358339
A11	22	SPX1	0.292341	-0.00411815
A11	23	SPX1	0.298652	0.00183329
A11	24	SPX1	0.293278	-0.00390105
A11	25	SPX1	0.301718	0.00417989
A11	26	SPX1	0.303298	0.00539917
A11	27	SPX1	0.31312	0.0148621
A11	28	SPX1	0.335007	0.036389
A11	29	SPX1	0.36785	0.0688719
A11	30	SPX1	0.430891	0.131553
A11	31	SPX1	0.555969	0.256271
A11	32	SPX1	0.760237	0.46018
A11	33	SPX1	1.01856	0.718144
A11	34	SPX1	1.19262	0.89184
A11	35	SPX1	1.25977	0.958629
A11	36	SPX1	1.35443	1.05293
A11	37	SPX1	1.49423	1.19238
A11	38	SPX1	1.62154	1.31933
A11	39	SPX1	1.75664	1.45406
A11	40	SPX1	1.85706	1.55412
A12	1	SPX1	0.326218	-0.00887558
A12	2	SPX1	0.328552	-0.00705153
A12	3	SPX1	0.335379	-0.000733324
A12	4	SPX1	0.336237	-0.000385028
A12	5	SPX1	0.340075	0.00294329
A12	6	SPX1	0.333449	-0.00419213
A12	7	SPX1	0.33394	-0.00421064
A12	8	SPX1	0.340544	0.00188464
A12	9	SPX1	0.338969	-0.000199885
A12	10	SPX1	0.339458	-0.000220185
A12	11	SPX1	0.342792	0.00260442
A12	12	SPX1	0.340998	0.000300305
A12	13	SPX1	0.343029	0.00182204
A12	14	SPX1	0.341205	-0.000510862
A12	15	SPX1	0.346279	0.00405312
A12	16	SPX1	0.34402	0.00128475
A12	17	SPX1	0.341268	-0.00197643
A12	18	SPX1	0.344037	0.000283444
A12	19	SPX1	0.342456	-0.00180755
A12	20	SPX1	0.348791	0.00401826
A12	21	SPX1	0.345252	-2.98498e-05
A12	22	SPX1	0.34547	-0.000321887
A12	23	SPX1	0.346223	-7.8018e-05
A12	24	SPX1	0.342529	-0.00428167
A12	25	SPX1	0.343729	-0.00359041
A12	26	SPX1	0.351173	0.0033436
A12	27	SPX1	0.354915	0.0065765
A12	28	SPX1	0.369617	0.0207688
A12	29	SPX1	0.394596	0.0452385
A12	30	SPX1	0.440632	0.0907655
A12	31	SPX1	0.516417	0.166041
A12	32	SPX1	0.669903	0.319017
A12	33	SPX1	0.893457	0.542062
A12	34	SPX1	1.1363	0.784397
A12	35	SPX1	1.23831	0.885898
A12	36	SPX1	1.28852	0.935596
A12	37	SPX1	1.42123	1.0678
A12	38	SPX1	1.54533	1.19138
A12	39	SPX1	1.68165	1.3272
A12	40	SPX1	1.79104	1.43608
B1	1	SPX1	0.302468	-0.00457221
B1	2	SPX1	0.311815	0.00437335
B1	3	SPX1	0.312031	0.00418862
B1	4	SPX1	0.311184	0.00294026
B1	5	SPX1	0.312564	0.00391907
B1	6	SPX1	0.30645	-0.00259523
B1	7	SPX1	0.310099	0.000652601
B1	8	SPX1	0.308256	-0.00159136
B1	9	SPX1	0.312002	0.00175304
B1	10	SPX1	0.311379	0.000729514
B1	11	SPX1	0.314215	0.00316476
B1	12	SPX1	0.312172	0.000720977
B1	13	SPX1	0.306141	-0.00571188
B1	14	SPX1	0.314155	0.00190179
B1	15	SPX1	0.305693	-0.00696168
B1	16	SPX1	0.310366	-0.00268963
B1	17	SPX1	0.311094	-0.00236251
B1	18	SPX1	0.316772	0.00291474
B1	19	SPX1	0.313824	-0.000434226
B1	20	SPX1	0.311251	-0.00340828
B1	21	SPX1	0.315143	8.27708e-05
B1	22	SPX1	0.308705	-0.00675617
B1	23	SPX1	0.308506	-0.0073559
B1	24	SPX1	0.313901	-0.00236246
B1	25	SPX1	0.315243	-0.00142156
B1	26	SPX1	0.312669	-0.00439651
B1	27	SPX1	0.324578	0.00711149
B1	28	SPX1	0.335835	0.0179678
B1	29	SPX1	0.344626	0.0263581
B1	30	SPX1	0.385521	0.0668516
B1	31	SPX1	0.452764	0.133694
B1	32	SPX1	0.567832	0.24836
B1	33	SPX1	0.767686	0.447814
B1	34	SPX1	0.994976	0.674703
B1	35	SPX1	1.16557	0.844897
B1	36	SPX1	1.18694	0.865862
B1	37	SPX1	1.31172	0.990242
B1	38	SPX1	1.42136	1.09948
B1	39	SPX1	1.55873	1.23645
B1	40	SPX1	1.66287	1.34019
B2	1	SPX1	0.32327	-0.00456277
B2	2	SPX1	0.329437	0.00130376
B2	3	SPX1	0.328663	0.000228886
B2	4	SPX1	0.331413	0.00267826
B2	5	SPX1	0.327609	-0.00142662
B2	6	SPX1	0.329945	0.000609122
B2	7	SPX1	0.331516	0.00187904
B2	8	SPX1	0.327296	-0.00264137
B2	9	SPX1	0.329947	-0.000291336
B2	10	SPX1	0.330642	0.000102508
B2	11	SPX1	0.334946	0.00410583
B2	12	SPX1	0.327749	-0.00339135
B2	13	SPX1	0.33419	0.00274847
B2	14	SPX1	0.332401	0.000658823
B2	15	SPX1	0.329217	-0.00282515
B2	16	SPX1	0.330207	-0.00213615
B2	17	SPX1	0.329091	-0.00355273
B2	18	SPX1	0.332748	-0.000196419
B2	19	SPX1	0.334522	0.00127684
B2	20	SPX1	0.333851	0.00030463
B2	21	SPX1	0.329452	-0.00439528
B2	22	SPX1	0.336159	0.00201106
B2	23	SPX1	0.335555	0.00110696
B2	24	SPX1	0.334266	-0.00048299
B2	25	SPX1	0.332847	-0.00220249
B2	26	SPX1	0.341182	0.00583148
B2	27	SPX1	0.343531	0.00787941
B2	28	SPX1	0.359393	0.023441
B2	29	SPX1	0.373686	0.037433
B2	30	SPX1	0.414555	0.0780015
B2	31	SPX1	0.488143	0.151289
B2	32	SPX1	0.629548	0.292393
B2	33	SPX1	0.848358	0.510902
B2	34	SPX1	1.10404	0.766286
B2	35	SPX1	1.25899	0.920931
B2	36	SPX1	1.30075	0.962392
B2	37	SPX1	1.43016	1.0915
B2	38	SPX1	1.55819	1.21924
B2	39	SPX1	1.70512	1.36586
B2	40	SPX1	1.81809	1.47853
B3	1	SPX1	0.286109	-0.00576371
B3	2	SPX1	0.293873	0.00191487
B3	3	SPX1	0.293072	0.00102913
B3	4	SPX1	0.289593	-0.00253489
B3	5	SPX1	0.296044	0.00383063
B3	6	SPX1	0.293906	0.00160783
B3	7	SPX1	0.294104	0.001721
B3	8	SPX1	0.293328	0.000859964
B3	9	SPX1	0.291561	-0.00099221
B3	10	SPX1	0.293599	0.000960807
B3	11	SPX1	0.291306	-0.00141708
B3	12	SPX1	0.292571	-0.000237106
B3	13	SPX1	0.289938	-0.00295528
B3	14	SPX1	0.295016	0.00203779
B3	15	SPX1	0.294193	0.00113011
B3	16	SPX1	0.29297	-0.000178324
B3	17	SPX1	0.28894	-0.00429297
B3	18	SPX1	0.290072	-0.00324577
B3	19	SPX1	0.293072	-0.000330671
B3	20	SPX1	0.290908	-0.00258011
B3	21	SPX1	0.289816	-0.00375747
B3	22	SPX1	0.29374	8.19436e-05
B3	23	SPX1	0.293438	-0.00030494
B3	24	SPX1	0.293207	-0.000621221
B3	25	SPX1	0.297635	0.003722
B3	26	SPX1	0.300465	0.00646684
B3	27	SPX1	0.308615	0.0145315
B3	28	SPX1	0.323081	0.0289132
B3	29	SPX1	0.355317	0.0610637
B3	30	SPX1	0.419038	0.124699
B3	31	SPX1	0.525346	0.230923
B3	32	SPX1	0.713132	0.418624
B3	33	SPX1	0.978477	0.683883
B3	34	SPX1	1.20195	0.90727
B3	35	SPX1	1.27626	0.9815
B3	36	SPX1	1.35926	1.06442
B3	37	SPX1	1.51044	1.2155
B3	38	SPX1	1.63547	1.34045
B3	39	SPX1	1.77072	1.47562
B3	40	SPX1	1.8748	1.57961
B4	1	SPX1	0.2965	-0.0074697
B4	2	SPX1	0.303671	-0.000433261
B4	3	SPX1	0.304451	0.000212392
B4	4	SPX1	0.303536	-0.000837677
B4	5	SPX1	0.306932	0.00242277
B4	6	SPX1	0.306086	0.00144205
B4	7	SPX1	0.306629	0.00185018
B4	8	SPX1	0.30611	0.00119616
B4	9	SPX1	0.303194	-0.00185436
B4	10	SPX1	0.306653	0.00146983
B4	11	SPX1	0.302047	-0.00327146
B4	12	SPX1	0.304625	-0.000827449
B4	13	SPX1	0.3033	-0.00228801
B4	14	SPX1	0.303335	-0.00238745
B4	15	SPX1	0.303882	-0.00197521
B4	16	SPX1	0.306386	0.000394003
B4	17	SPX1	0.304218	-0.00190964
B4	18	SPX1	0.307947	0.00168519
B4	19	SPX1	0.304014	-0.00238254
B4	20	SPX1	0.313593	0.00706123
B4	21	SPX1	0.311476	0.00480921
B4	22	SPX1	0.321886	0.0150843
B4	23	SPX1	0.336219	0.0292823
B4	24	SPX1	0.359235	0.0521639
B4	25	SPX1	0.420036	0.11283
B4	26	SPX1	0.509234	0.201893
B4	27	SPX1	0.677707	0.370231
B4	28	SPX1	0.931484	0.623873
B4	29	SPX1	1.16909	0.861343
B4	30	SPX1	1.2697	0.961824
B4	31	SPX1	1.34524	1.03722
B4	32	SPX1	1.48314	1.17499
B4	33	SPX1	1.63254	1.32426
B4	34	SPX1	1.75456	1.44614
B4	35	SPX1	1.88203	1.57347
B4	36	SPX1	1.97554	1.66685
B4	37	SPX1	2.05669	1.74786
B4	38	SPX1	2.13939	1.83043
B4	39	SPX1	2.2149	1.90581
B4	40	SPX1	2.26951	1.96028
B5	1	SPX1	0.290259	-0.00207409
B5	2	SPX1	0.291728	-0.000745835
B5	3	SPX1	0.293213	0.000598276
B5	4	SPX1	0.295061	0.00230484
B5	5	SPX1	0.29269	-0.000207496
B5	6	SPX1	0.294465	0.00142597
B5	7	SPX1	0.292405	-0.000774998
B5	8	SPX1	0.294083	0.000762054
B5	9	SPX1	0.295925	0.00246284
B5	10	SPX1	0.293739	0.000135811
B5	11	SPX1	0.290832	-0.00291282
B5	12	SPX1	0.291488	-0.00239751
B5	13	SPX1	0.291131	-0.0028962
B5	14	SPX1	0.294548	0.000379492
B5	15	SPX1	0.29184	-0.00246881
B5	16	SPX1	0.293533	-0.000917691
B5	17	SPX1	0.292923	-0.00166835
B5	18	SPX1	0.292482	-0.00225037
B5	19	SPX1	0.296261	0.00138673
B5	20	SPX1	0.298161	0.00314572
B5	21	SPX1	0.299049	0.00389251
B5	22	SPX1	0.307026	0.0117282
B5	23	SPX1	0.319751	0.0243121
B5	24	SPX1	0.34575	0.05017
B5	25	SPX1	0.391699	0.0959785
B5	26	SPX1	0.476947	0.181084
B5	27	SPX1	0.630072	0.334069
B5	28	SPX1	0.850227	0.554082
B5	29	SPX1	1.07793	0.781642
B5	30	SPX1	1.17039	0.873966
B5	31	SPX1	1.24251	0.945941
B5	32	SPX1	1.35881	1.0621
B5	33	SPX1	1.49615	1.1993
B5	34	SPX1	1.60581	1.30882
B5	35	SPX1	1.71092	1.41379
B5	36	SPX1	1.78863	1.49136
B5	37	SPX1	1.87768	1.58027
B5	38	SPX1	1.94623	1.64868
B5	39	SPX1	2.02236	1.72466
B5	40	SPX1	2.06479	1.76695
B6	1	SPX1	0.261995	-0.00108683
B6	2	SPX1	0.263152	-0.000217578
B6	3	SPX1	0.263935	0.00027834
B6	4	SPX1	0.264249	0.000305347
B6	5	SPX1	0.265757	0.00152561
B6	6	SPX1	0.265113	0.000594354
B6	7	SPX1	0.26486	5.43427e-05
B6	8	SPX1	0.266603	0.00150972
B6	9	SPX1	0.264903	-0.000477317
B6	10	SPX1	0.266667	0.00099865
B6	11	SPX1	0.263254	-0.00270115
B6	12	SPX1	0.265901	-0.000341905
B6	13	SPX1	0.26709	0.000559831
B6	14	SPX1	0.266511	-0.000306575
B6	15	SPX1	0.264354	-0.00275057
B6	16	SPX1	0.263899	-0.00349362
B6	17	SPX1	0.267219	-0.000460454
B6	18	SPX1	0.265817	-0.00214967
B6	19	SPX1	0.267857	-0.000396813
B6	20	SPX1	0.270183	0.00164149
B6	21	SPX1	0.274439	0.0056104
B6	22	SPX1	0.278242	0.00912553
B6	23	SPX1	0.296107	0.0267037
B6	24	SPX1	0.319673	0.0499823
B6	25	SPX1	0.376991	0.107013
B6	26	SPX1	0.467778	0.197512
B6	27	SPX1	0.638355	0.367802
B6	28	SPX1	0.888993	0.618153
B6	29	SPX1	1.13729	0.866166
B6	30	SPX1	1.25637	0.984953
B6	31	SPX1	1.32944	1.05773
B6	32	SPX1	1.4673	1.19531
B6	33	SPX1	1.6289	1.35662
B6	34	SPX1	1.75924	1.48667
B6	35	SPX1	1.87942	1.60657
B6	36	SPX1	1.98177	1.70863
B6	37	SPX1	2.0764	1.80297
B6	38	SPX1	2.15229	1.87857
B6	39	SPX1	2.23144	1.95744
B6	40	SPX1	2.30309	2.0288
B7	1	SPX2	0.283066	-0.00190307
B7	2	SPX2	0.2836	-0.00151008
B7	3	SPX2	0.285306	5.43299e-05
B7	4	SPX2	0.288405	0.00301289
B7	5	SPX2	0.287448	0.00191476
B7	6	SPX2	0.284764	-0.000910482
B7	7	SPX2	0.283789	-0.00202641
B7	8	SPX2	0.285393	-0.00056324
B7	9	SPX2	0.285383	-0.000713779
B7	10	SPX2	0.284601	-0.00163679
B7	11	SPX2	0.288374	0.00199494
B7	12	SPX2	0.284559	-0.00196073
B7	13	SPX2	0.285215	-0.00144581
B7	14	SPX2	0.284612	-0.00218945
B7	15	SPX2	0.287713	0.000770512
B7	16	SPX2	0.287437	0.000354137
B7	17	SPX2	0.288471	0.00124668
B7	18	SPX2	0.289463	0.00209845
B7	19	SPX2	0.29706	0.00955418
B7	20	SPX2	0.310078	0.0224311
B7	21	SPX2	0.332767	0.0449793
B7	22	SPX2	0.372941	0.0850124
B7	23	SPX2	0.455588	0.167518
B7	24	SPX2	0.596247	0.308036
B7	25	SPX2	0.841186	0.552834
B7	26	SPX2	1.20865	0.920154
B7	27	SPX2	1.64624	1.35761
B7	28	SPX2	2.04283	1.75406
B7	29	SPX2	2.27247	1.98356
B7	30	SPX2	2.43729	2.14823
B7	31	SPX2	2.56244	2.27324
B7	32	SPX2	2.66327	2.37393
B7	33	SPX2	2.75337	2.46389
B7	34	SPX2	2.80285	2.51323
B7	35	SPX2	2.85251	2.56275
B7	36	SPX2	2.88722	2.59732
B7	37	SPX2	2.91161	2.62157
B7	38	SPX2	2.93193	2.64175
B7	39	SPX2	2.95124	2.66092
B7	40	SPX2	2.97049	2.68002
B8	1	SPX2	0.313494	-0.00307624
B8	2	SPX2	0.317191	0.000246778
B8	3	SPX2	0.319042	0.00172264
B8	4	SPX2	0.31702	-0.000673349
B8	5	SPX2	0.317132	-0.000935495
B8	6	SPX2	0.319672	0.00123062
B8	7	SPX2	0.317993	-0.000822942
B8	8	SPX2	0.320767	0.00157733
B8	9	SPX2	0.319729	0.000164637
B8	10	SPX2	0.321366	0.0014284
B8	11	SPX2	0.318745	-0.00156772
B8	12	SPX2	0.317749	-0.00293711
B8	13	SPX2	0.319712	-0.00134815
B8	14	SPX2	0.320487	-0.000948147
B8	15	SPX2	0.321407	-0.000401756
B8	16	SPX2	0.32355	0.00136662
B8	17	SPX2	0.321511	-0.0010466
B8	18	SPX2	0.326122	0.00319102
B8	19	SPX2	0.331157	0.00785159
B8	20	SPX2	0.345995	0.0223147
B8	21	SPX2	0.365928	0.0418741
B8	22	SPX2	0.414734	0.0903055
B8	23	SPX2	0.500943	0.17614
B8	24	SPX2	0.659949	0.334772
B8	25	SPX2	0.919212	0.593661
B8	26	SPX2	1.30328	0.977352
B8	27	SPX2	1.75349	1.4272
B8	28	SPX2	2.1363	1.80962
B8	29	SPX2	2.34829	2.02124
B8	30	SPX2	2.50418	2.17676
B8	31	SPX2	2.61253	2.28473
B8	32	SPX2	2.72074	2.39257
B8	33	SPX2	2.80093	2.47239
B8	34	SPX2	2.83985	2.51093
B8	35	SPX2	2.89149	2.56219
B8	36	SPX2	2.92612	2.59645
B8	37	SPX2	2.94677	2.61673
B8	38	SPX2	2.96426	2.63385
B8	39	SPX2	2.97572	2.64493
B8	40	SPX2	3.00476	2.67359
B9	1	SPX2	0.360347	-0.00261386
B9	2	SPX2	0.364972	0.00201809
B9	3	SPX2	0.363162	0.000215748
B9	4	SPX2	0.366896	0.00395592
B9	5	SPX2	0.362163	-0.000769433
B9	6	SPX2	0.362929	3.02511e-06
B9	7	SPX2	0.361528	-0.00139097
B9	8	SPX2	0.364024	0.00111196
B9	9	SPX2	0.363227	0.000321886
B9	10	SPX2	0.363839	0.000941488
B9	11	SPX2	0.359918	-0.00297259
B9	12	SPX2	0.359969	-0.00291434
B9	13	SPX2	0.360858	-0.0020185
B9	14	SPX2	0.363205	0.000335506
B9	15	SPX2	0.360932	-0.0019302
B9	16	SPX2	0.361084	-0.00177155
B9	17	SPX2	0.364326	0.00147769
B9	18	SPX2	0.368246	0.00540436
B9	19	SPX2	0.373516	0.0106814
B9	20	SPX2	0.384332	0.021505
B9	21	SPX2	0.406899	0.0440785
B9	22	SPX2	0.451286	0.0884731
B9	23	SPX2	0.531767	0.16896
B9	24	SPX2	0.678151	0.315351
B9	25	SPX2	0.925596	0.562804
B9	26	SPX2	1.29612	0.933332
B9	27	SPX2	1.73192	1.36914
B9	28	SPX2	2.10608	1.74331
B9	29	SPX2	2.31366	1.95089
B9	30	SPX2	2.46372	2.10096
B9	31	SPX2	2.57753	2.21478
B9	32	SPX2	2.66968	2.30694
B9	33	SPX2	2.7415	2.37877
B9	34	SPX2	2.80222	2.43949
B9	35	SPX2	2.8434	2.48067
B9	36	SPX2	2.8716	2.50889
B9	37	SPX2	2.90326	2.54056
B9	38	SPX2	2.90762	2.54492
B9	39	SPX2	2.93483	2.57214
B9	40	SPX2	2.95646	2.59378
B10	1	SPX2	0.35372	-0.00573377
B10	2	SPX2	0.361406	0.00154559
B10	3	SPX2	0.364417	0.00414995
B10	4	SPX2	0.359935	-0.000739131
B10	5	SPX2	0.361394	0.000313062
B10	6	SPX2	0.359999	-0.00148978
B10	7	SPX2	0.361527	-0.000368593
B10	8	SPX2	0.359295	-0.00300763
B10	9	SPX2	0.362192	-0.000517412
B10	10	SPX2	0.364066	0.00094951
B10	11	SPX2	0.365272	0.00174877
B10	12	SPX2	0.361463	-0.00246719
B10	13	SPX2	0.364071	-0.000266479
B10	14	SPX2	0.362416	-0.00232797
B10	15	SPX2	0.366367	0.00121614
B10	16	SPX2	0.365406	-0.000151555
B10	17	SPX2	0.368923	0.00295831
B10	18	SPX2	0.374129	0.00775761
B10	19	SPX2	0.38734	0.0205612
B10	20	SPX2	0.403389	0.0362034
B10	21	SPX2	0.439798	0.0722053
B10	22	SPX2	0.513732	0.145733
B10	23	SPX2	0.649321	0.280915
B10	24	SPX2	0.879765	0.510952
B10	25	SPX2	1.2317	0.862476
B10	26	SPX2	1.66302	1.2934
B10	27	SPX2	2.05911	1.68907
B10	28	SPX2	2.33371	1.96327
B10	29	SPX2	2.46489	2.09405
B10	30	SPX2	2.58525	2.214
B10	31	SPX2	2.67563	2.30397
B10	32	SPX2	2.77096	2.39889
B10	33	SPX2	2.8374	2.46492
B10	34	SPX2	2.86485	2.49197
B10	35	SPX2	2.90031	2.52702
B10	36	SPX2	2.92087	2.54717
B10	37	SPX2	2.94565	2.57155
B10	38	SPX2	2.97076	2.59625
B10	39	SPX2	2.98253	2.60761
B10	40	SPX2	2.99484	2.61951
B11	1	SPX2	0.390842	-0.0119743
B11	2	SPX2	0.399684	-0.00404228
B11	3	SPX2	0.40226	-0.0023753
B11	4	SPX2	0.406538	0.000993279
B11	5	SPX2	0.411293	0.00483872
B11	6	SPX2	0.407852	0.000488528
B11	7	SPX2	0.408082	-0.000190944
B11	8	SPX2	0.410066	0.000883093
B11	9	SPX2	0.412123	0.00203113
B11	10	SPX2	0.407692	-0.00330978
B11	11	SPX2	0.409629	-0.00228143
B11	12	SPX2	0.410035	-0.00278513
B11	13	SPX2	0.413125	-0.000604505
B11	14	SPX2	0.41537	0.000731107
B11	15	SPX2	0.413202	-0.00234706
B11	16	SPX2	0.414143	-0.00231486
B11	17	SPX2	0.416243	-0.00112477
B11	18	SPX2	0.425645	0.00736793
B11	19	SPX2	0.432015	0.0128286
B11	20	SPX2	0.452656	0.0325599
B11	21	SPX2	0.485617	0.0646113
B11	22	SPX2	0.55538	0.133465
B11	23	SPX2	0.680183	0.257359
B11	24	SPX2	0.90083	0.477096
B11	25	SPX2	1.23662	0.811981
B11	26	SPX2	1.6566	1.23105
B11	27	SPX2	2.03555	1.60908
B11	28	SPX2	2.28355	1.85618
B11	29	SPX2	2.4202	1.99192
B11	30	SPX2	2.55872	2.12953
B11	31	SPX2	2.66327	2.23317
B11	32	SPX2	2.75805	2.32704
B11	33	SPX2	2.82696	2.39504
B11	34	SPX2	2.87708	2.44425
B11	35	SPX2	2.91402	2.48028
B11	36	SPX2	2.93384	2.4992
B11	37	SPX2	2.97031	2.53476
B11	38	SPX2	2.98335	2.54689
B11	39	SPX2	3.00584	2.56846
B11	40	SPX2	3.02981	2.59153
B12	1	SPX2	0.482635	-0.0162651
B12	2	SPX2	0.498573	-0.00129474
B12	3	SPX2	0.499871	-0.000964536
B12	4	SPX2	0.503825	0.00202189
B12	5	SPX2	0.502745	-2.67253e-05
B12	6	SPX2	0.502502	-0.00123748
B12	7	SPX2	0.503474	-0.00123355
B12	8	SPX2	0.504615	-0.0010601
B12	9	SPX2	0.508868	0.00222536
B12	10	SPX2	0.505951	-0.00165973
B12	11	SPX2	0.511387	0.00280846
B12	12	SPX2	0.51133	0.00178374
B12	13	SPX2	0.504841	-0.00567329
B12	14	SPX2	0.516011	0.00452858
B12	15	SPX2	0.513006	0.000556225
B12	16	SPX2	0.512487	-0.000930915
B12	17	SPX2	0.513248	-0.00113793
B12	18	SPX2	0.521802	0.00644795
B12	19	SPX2	0.534731	0.0184096
B12	20	SPX2	0.549593	0.0323037
B12	21	SPX2	0.581817	0.0635598
B12	22	SPX2	0.659562	0.140336
B12	23	SPX2	0.788031	0.267839
B12	24	SPX2	1.0156	0.494437
B12	25	SPX2	1.35819	0.836059
B12	26	SPX2	1.76465	1.24155
B12	27	SPX2	2.14791	1.62385
B12	28	SPX2	2.38798	1.86295
B12	29	SPX2	2.52238	1.99638
B12	30	SPX2	2.64114	2.11417
B12	31	SPX2	2.72998	2.20204
B12	32	SPX2	2.80228	2.27337
B12	33	SPX2	2.8644	2.33453
B12	34	SPX2	2.90562	2.37478
B12	35	SPX2	2.94631	2.41451
B12	36	SPX2	2.96048	2.4277
B12	37	SPX2	2.99179	2.45805
B12	38	SPX2	3.00796	2.47325
B12	39	SPX2	3.02488	2.4892
B12	40	SPX2	3.03497	2.49832
C1	1	SPX2	0.319716	-0.00804589
C1	2	SPX2	0.325842	-0.00276646
C1	3	SPX2	0.327702	-0.0017536
C1	4	SPX2	0.329403	-0.000899044
C1	5	SPX2	0.330957	-0.000190968
C1	6	SPX2	0.331165	-0.000829332
C1	7	SPX2	0.33637	0.00352893
C1	8	SPX2	0.333962	0.000274401
C1	9	SPX2	0.336132	0.00159876
C1	10	SPX2	0.335428	4.81464e-05
C1	11	SPX2	0.333408	-0.00281883
C1	12	SPX2	0.338847	0.00177382
C1	13	SPX2	0.341252	0.00333276
C1	14	SPX2	0.339023	0.000256861
C1	15	SPX2	0.337834	-0.00177771
C1	16	SPX2	0.336273	-0.00418598
C1	17	SPX2	0.341397	9.16431e-05
C1	18	SPX2	0.343701	0.00155014
C1	19	SPX2	0.343309	0.000311648
C1	20	SPX2	0.359286	0.015442
C1	21	SPX2	0.375442	0.0307516
C1	22	SPX2	0.410917	0.06538
C1	23	SPX2	0.47715	0.130767
C1	24	SPX2	0.604407	0.257178
C1	25	SPX2	0.824817	0.476741
C1	26	SPX2	1.15676	0.807834
C1	27	SPX2	1.55189	1.20212
C1	28	SPX2	1.9332	1.58259
C1	29	SPX2	2.15444	1.80297
C1	30	SPX2	2.29544	1.94313
C1	31	SPX2	2.42549	2.07234
C1	32	SPX2	2.53041	2.17641
C1	33	SPX2	2.60553	2.25068
C1	34	SPX2	2.66389	2.30819
C1	35	SPX2	2.72085	2.36431
C1	36	SPX2	2.75611	2.39873
C1	37	SPX2	2.78663	2.4284
C1	38	SPX2	2.79269	2.43361
C1	39	SPX2	2.82507	2.46515
C1	40	SPX2	2.83779	2.47701
C2	1	SPX2	0.281067	-0.00495544
C2	2	SPX2	0.28475	-0.00185483
C2	3	SPX2	0.288889	0.00170229
C2	4	SPX2	0.288087	0.000319053
C2	5	SPX2	0.289071	0.00072133
C2	6	SPX2	0.288939	7.39156e-06
C2	7	SPX2	0.287704	-0.00180941
C2	8	SPX2	0.289164	-0.00093143
C2	9	SPX2	0.288676	-0.00200109
C2	10	SPX2	0.293297	0.00203826
C2	11	SPX2	0.296949	0.00510788
C2	12	SPX2	0.292633	0.000210023
C2	13	SPX2	0.288754	-0.0042509
C2	14	SPX2	0.29293	-0.00065611
C2	15	SPX2	0.289276	-0.00489233
C2	16	SPX2	0.293908	-0.000841857
C2	17	SPX2	0.295052	-0.0002796
C2	18	SPX2	0.296429	0.000514846
C2	19	SPX2	0.301537	0.00504165
C2	20	SPX2	0.309193	0.0121151
C2	21	SPX2	0.325141	0.0274823
C2	22	SPX2	0.354847	0.0566056
C2	23	SPX2	0.414935	0.116113
C2	24	SPX2	0.528287	0.228882
C2	25	SPX2	0.718648	0.418662
C2	26	SPX2	1.02059	0.720021
C2	27	SPX2	1.42688	1.12573
C2	28	SPX2	1.8212	1.51947
C2	29	SPX2	2.08472	1.78241
C2	30	SPX2	2.23146	1.92856
C2	31	SPX2	2.35173	2.04825
C2	32	SPX2	2.4532	2.14914
C2	33	SPX2	2.53401	2.22937
C2	34	SPX2	2.58556	2.28033
C2	35	SPX2	2.62774	2.32193
C2	36	SPX2	2.65729	2.35091
C2	37	SPX2	2.68734	2.38038
C2	38	SPX2	2.71208	2.40453
C2	39	SPX2	2.71647	2.40834
C2	40	SPX2	2.74963	2.44092
C3	1	SPX2	0.266454	-0.00244265
C3	2	SPX2	0.267304	-0.00196648
C3	3	SPX2	0.269317	-0.000327492
C3	4	SPX2	0.273469	0.00344943
C3	5	SPX2	0.270351	-4.24974e-05
C3	6	SPX2	0.270505	-0.000263201
C3	7	SPX2	0.268589	-0.00255299
C3	8	SPX2	0.268984	-0.00253212
C3	9	SPX2	0.27217	0.000279447
C3	10	SPX2	0.278552	0.00628761
C3	11	SPX2	0.272466	-0.000172778
C3	12	SPX2	0.269585	-0.00342784
C3	13	SPX2	0.272633	-0.000754674
C3	14	SPX2	0.269018	-0.004744
C3	15	SPX2	0.274188	5.18318e-05
C3	16	SPX2	0.276155	0.0016452
C3	17	SPX2	0.276884	0.00199938
C3	18	SPX2	0.276363	0.0011047
C3	19	SPX2	0.284236	0.00860345
C3	20	SPX2	0.299639	0.0236315
C3	21	SPX2	0.314129	0.0377476
C3	22	SPX2	0.351272	0.0745167
C3	23	SPX2	0.422038	0.144908
C3	24	SPX2	0.55264	0.275136
C3	25	SPX2	0.773467	0.495588
C3	26	SPX2	1.11604	0.837788
C3	27	SPX2	1.55642	1.27779
C3	28	SPX2	1.99448	1.71548
C3	29	SPX2	2.24608	1.9667
C3	30	SPX2	2.4095	2.12975
C3	31	SPX2	2.53818	2.25805
C3	32	SPX2	2.64478	2.36429
C3	33	SPX2	2.72891	2.44804
C3	34	SPX2	2.79288	2.51163
C3	35	SPX2	2.84278	2.56116
C3	36	SPX2	2.86544	2.58345
C3	37	SPX2	2.90127	2.6189
C3	38	SPX2	2.92601	2.64326
C3	39	SPX2	2.96078	2.67766
C3	40	SPX2	2.9513	2.66781
C4	1	SPX2	0.309053	-0.00157358
C4	2	SPX2	0.318071	0.00717781
C4	3	SPX2	0.317468	0.00630815
C4	4	SPX2	0.30735	-0.00407724
C4	5	SPX2	0.310525	-0.0011688
C4	6	SPX2	0.314191	0.0022306
C4	7	SPX2	0.311463	-0.000764944
C4	8	SPX2	0.311489	-0.00100592
C4	9	SPX2	0.310423	-0.00233895
C4	10	SPX2	0.315319	0.00229096
C4	11	SPX2	0.313209	-8.68141e-05
C4	12	SPX2	0.311937	-0.00162536
C4	13	SPX2	0.311286	-0.00254288
C4	14	SPX2	0.313389	-0.000706965
C4	15	SPX2	0.311795	-0.00256821
C4	16	SPX2	0.314263	-0.000366946
C4	17	SPX2	0.32132	0.00642331
C4	18	SPX2	0.320351	0.00518717
C4	19	SPX2	0.333784	0.0183536
C4	20	SPX2	0.352538	0.0368401
C4	21	SPX2	0.384154	0.0681894
C4	22	SPX2	0.452759	0.136528
C4	23	SPX2	0.580187	0.263689
C4	24	SPX2	0.800403	0.483638
C4	25	SPX2	1.1409	0.823867
C4	26	SPX2	1.57788	1.26059
C4	27	SPX2	2.00605	1.68848
C4	28	SPX2	2.30874	1.99091
C4	29	SPX2	2.44912	2.13102
C4	30	SPX2	2.58563	2.26726
C4	31	SPX2	2.68528	2.36665
C4	32	SPX2	2.76006	2.44116
C4	33	SPX2	2.84103	2.52186
C4	34	SPX2	2.88527	2.56584
C4	35	SPX2	2.90447	2.58477
C4	36	SPX2	2.93974	2.61977
C4	37	SPX2	2.95329	2.63305
C4	38	SPX2	2.98831	2.66781
C4	39	SPX2	2.98958	2.66881
C4	40	SPX2	2.99989	2.67885
C5	1	SPX2	0.303186	-0.000388872
C5	2	SPX2	0.305718	0.00174565
C5	3	SPX2	0.306391	0.00202193
C5	4	SPX2	0.305785	0.0010188
C5	5	SPX2	0.304858	-0.000305509
C5	6	SPX2	0.307372	0.00181131
C5	7	SPX2	0.304145	-0.0018121
C5	8	SPX2	0.30991	0.00355484
C5	9	SPX2	0.305898	-0.000854223
C5	10	SPX2	0.305308	-0.00184132
C5	11	SPX2	0.305524	-0.00202164
C5	12	SPX2	0.305442	-0.00250081
C5	13	SPX2	0.305545	-0.00279503
C5	14	SPX2	0.307523	-0.00121475
C5	15	SPX2	0.308441	-0.000693668
C5	16	SPX2	0.306276	-0.0032557
C5	17	SPX2	0.310959	0.00102995
C5	18	SPX2	0.318184	0.00785792
C5	19	SPX2	0.325812	0.0150888
C5	20	SPX2	0.340129	0.0290096
C5	21	SPX2	0.373718	0.062201
C5	22	SPX2	0.427026	0.115112
C5	23	SPX2	0.543938	0.231627
C5	24	SPX2	0.738266	0.425558
C5	25	SPX2	1.04561	0.7325
C5	26	SPX2	1.46818	1.15467
C5	27	SPX2	1.88368	1.56978
C5	28	SPX2	2.18965	1.87535
C5	29	SPX2	2.35536	2.04067
C5	30	SPX2	2.50597	2.19088
C5	31	SPX2	2.6369	2.32141
C5	32	SPX2	2.73372	2.41783
C5	33	SPX2	2.81462	2.49834
C5	34	SPX2	2.87951	2.56283
C5	35	SPX2	2.90434	2.58727
C5	36	SPX2	2.93961	2.62214
C5	37	SPX2	2.97454	2.65667
C5	38	SPX2	2.99502	2.67676
C5	39	SPX2	3.01272	2.69405
C5	40	SPX2	3.01651	2.69745
C6	1	SPX2	0.282387	-0.00136739
C6	2	SPX2	0.285754	0.00157971
C6	3	SPX2	0.289084	0.00448916
C6	4	SPX2	0.284882	-0.000132129
C6	5	SPX2	0.284524	-0.00091092
C6	6	SPX2	0.28505	-0.000804611
C6	7	SPX2	0.285869	-0.000405704
C6	8	SPX2	0.286117	-0.000577839
C6	9	SPX2	0.286643	-0.000472573
C6	10	SPX2	0.290205	0.00266979
C6	11	SPX2	0.287124	-0.000831178
C6	12	SPX2	0.285941	-0.00243508
C6	13	SPX2	0.285967	-0.00282891
C6	14	SPX2	0.285909	-0.00330676
C6	15	SPX2	0.287947	-0.00168899
C6	16	SPX2	0.289369	-0.000686798
C6	17	SPX2	0.293863	0.00338647
C6	18	SPX2	0.295433	0.00453607
C6	19	SPX2	0.30428	0.0129635
C6	20	SPX2	0.321526	0.0297893
C6	21	SPX2	0.351852	0.0596945
C6	22	SPX2	0.415493	0.122916
C6	23	SPX2	0.531063	0.238066
C6	24	SPX2	0.735352	0.441935
C6	25	SPX2	1.06465	0.770809
C6	26	SPX2	1.50493	1.21067
C6	27	SPX2	1.951	1.65632
C6	28	SPX2	2.28785	1.99276
C6	29	SPX2	2.46134	2.16582
C6	30	SPX2	2.60148	2.30554
C6	31	SPX2	2.71413	2.41777
C6	32	SPX2	2.80678	2.51
C6	33	SPX2	2.88137	2.58417
C6	34	SPX2	2.92111	2.62349
C6	35	SPX2	2.96167	2.66363
C6	36	SPX2	3.0093	2.71084
C6	37	SPX2	3.0294	2.73052
C6	38	SPX2	3.03508	2.73578
C6	39	SPX2	3.06142	2.7617
C6	40	SPX2	3.0709	2.77076
C7	1	SPX2	0.284275	-0.00051134
C7	2	SPX2	0.285865	0.000848488
C7	3	SPX2	0.285498	0.000251704
C7	4	SPX2	0.286267	0.00079009
C7	5	SPX2	0.285405	-0.000301889
C7	6	SPX2	0.287429	0.00149252
C7	7	SPX2	0.287181	0.00101405
C7	8	SPX2	0.283896	-0.00250092
C7	9	SPX2	0.287959	0.00133217
C7	10	SPX2	0.2869	4.34076e-05
C7	11	SPX2	0.287752	0.0006653
C7	12	SPX2	0.28609	-0.0012269
C7	13	SPX2	0.286159	-0.00138762
C7	14	SPX2	0.284871	-0.00290625
C7	15	SPX2	0.287594	-0.000413187
C7	16	SPX2	0.287166	-0.00107124
C7	17	SPX2	0.288535	6.76289e-05
C7	18	SPX2	0.290125	0.00142838
C7	19	SPX2	0.29165	0.00272276
C7	20	SPX2	0.296925	0.00776812
C7	21	SPX2	0.307053	0.0176658
C7	22	SPX2	0.327495	0.0378777
C7	23	SPX2	0.364876	0.0750288
C7	24	SPX2	0.438491	0.148414
C7	25	SPX2	0.575864	0.285556
C7	26	SPX2	0.807438	0.516901
C7	27	SPX2	1.16955	0.878785
C7	28	SPX2	1.62743	1.33643
C7	29	SPX2	2.03959	1.74836
C7	30	SPX2	2.34267	2.05122
C7	31	SPX2	2.4937	2.20201
C7	32	SPX2	2.62768	2.33577
C7	33	SPX2	2.74691	2.45476
C7	34	SPX2	2.82836	2.53598
C7	35	SPX2	2.8842	2.59159
C7	36	SPX2	2.93832	2.64548
C7	37	SPX2	2.97335	2.68028
C7	38	SPX2	2.99005	2.69675
C7	39	SPX2	3.01382	2.72029
C7	40	SPX2	3.0369	2.74314
C8	1	SPX2	0.315799	0.00107777
C8	2	SPX2	0.318418	0.00327941
C8	3	SPX2	0.319351	0.00379465
C8	4	SPX2	0.317633	0.00166011
C8	5	SPX2	0.316255	-0.000135782
C8	6	SPX2	0.319425	0.00261747
C8	7	SPX2	0.318414	0.00118913
C8	8	SPX2	0.315643	-0.00199916
C8	9	SPX2	0.315472	-0.00258699
C8	10	SPX2	0.316974	-0.00150226
C8	11	SPX2	0.316219	-0.00267495
C8	12	SPX2	0.318557	-0.000753666
C8	13	SPX2	0.317374	-0.00235433
C8	14	SPX2	0.32072	0.00057437
C8	15	SPX2	0.317943	-0.00262
C8	16	SPX2	0.317756	-0.00322356
C8	17	SPX2	0.31842	-0.00297746
C8	18	SPX2	0.322703	0.000888814
C8	19	SPX2	0.324851	0.0026191
C8	20	SPX2	0.330133	0.00748453
C8	21	SPX2	0.339989	0.0169227
C8	22	SPX2	0.361096	0.037613
C8	23	SPX2	0.398929	0.075029
C8	24	SPX2	0.479279	0.154962
C8	25	SPX2	0.622561	0.297826
C8	26	SPX2	0.861558	0.536407
C8	27	SPX2	1.23346	0.90789
C8	28	SPX2	1.67793	1.35195
C8	29	SPX2	2.07332	1.74692
C8	30	SPX2	2.32803	2.00121
C8	31	SPX2	2.48744	2.1602
C8	32	SPX2	2.61338	2.28573
C8	33	SPX2	2.73146	2.40339
C8	34	SPX2	2.80902	2.48053
C8	35	SPX2	2.85898	2.53007
C8	36	SPX2	2.91087	2.58154
C8	37	SPX2	2.95	2.62026
C8	38	SPX2	2.96673	2.63657
C8	39	SPX2	2.98963	2.65906
C8	40	SPX2	3.02037	2.68937
C9	1	SPX2	0.424129	0.00884587
C9	2	SPX2	0.42521	0.0100506
C9	3	SPX2	0.420038	0.005003
C9	4	SPX2	0.420008	0.00509679
C9	5	SPX2	0.414851	6.38558e-05
C9	6	SPX2	0.41334	-0.00132374
C9	7	SPX2	0.414673	0.00013296
C9	8	SPX2	0.411503	-0.00291219
C9	9	SPX2	0.414173	-0.000118311
C9	10	SPX2	0.413497	-0.000670909
C9	11	SPX2	0.410745	-0.00329879
C9	12	SPX2	0.409839	-0.00408078
C9	13	SPX2	0.410171	-0.00362481
C9	14	SPX2	0.413379	-0.000292941
C9	15	SPX2	0.411179	-0.00236862
C9	16	SPX2	0.412446	-0.000978134
C9	17	SPX2	0.410991	-0.00230863
C9	18	SPX2	0.414191	0.00101525
C9	19	SPX2	0.415373	0.00232091
C9	20	SPX2	0.421273	0.00834509
C9	21	SPX2	0.430832	0.0180274
C9	22	SPX2	0.44879	0.0361091
C9	23	SPX2	0.489489	0.0769326
C9	24	SPX2	0.556687	0.144255
C9	25	SPX2	0.684892	0.272584
C9	26	SPX2	0.906214	0.494029
C9	27	SPX2	1.25211	0.840054
C9	28	SPX2	1.67094	1.259
C9	29	SPX2	2.04698	1.63516
C9	30	SPX2	2.3108	1.89911
C9	31	SPX2	2.44288	2.03132
C9	32	SPX2	2.56472	2.15328
C9	33	SPX2	2.66945	2.25813
C9	34	SPX2	2.73532	2.32412
C9	35	SPX2	2.79601	2.38494
C9	36	SPX2	2.83563	2.42469
C9	37	SPX2	2.86086	2.45004
C9	38	SPX2	2.89101	2.48031
C9	39	SPX2	2.92423	2.51366
C9	40	SPX2	2.92015	2.5097
C10	1	SPX2	0.321834	-0.00392319
C10	2	SPX2	0.326505	0.000466592
C10	3	SPX2	0.326594	0.000275014
C10	4	SPX2	0.329399	0.00279837
C10	5	SPX2	0.327897	0.0010163
C10	6	SPX2	0.32719	2.84034e-05
C10	7	SPX2	0.326657	-0.000785417
C10	8	SPX2	0.329557	0.00183357
C10	9	SPX2	0.325876	-0.00212854
C10	10	SPX2	0.330268	0.00198286
C10	11	SPX2	0.326907	-0.00165911
C10	12	SPX2	0.325456	-0.00339141
C10	13	SPX2	0.327409	-0.00171915
C10	14	SPX2	0.325658	-0.0037512
C10	15	SPX2	0.326253	-0.00343745
C10	16	SPX2	0.330486	0.000514959
C10	17	SPX2	0.33184	0.0015878
C10	18	SPX2	0.337368	0.00683497
C10	19	SPX2	0.345265	0.0144511
C10	20	SPX2	0.358354	0.0272591
C10	21	SPX2	0.382615	0.0512395
C10	22	SPX2	0.436758	0.105102
C10	23	SPX2	0.544524	0.212587
C10	24	SPX2	0.724463	0.392245
C10	25	SPX2	1.01439	0.681892
C10	26	SPX2	1.42445	1.09167
C10	27	SPX2	1.85602	1.52296
C10	28	SPX2	2.19124	1.8579
C10	29	SPX2	2.35208	2.01845
C10	30	SPX2	2.49354	2.15964
C10	31	SPX2	2.59886	2.26468
C10	32	SPX2	2.68313	2.34866
C10	33	SPX2	2.76095	2.42621
C10	34	SPX2	2.81319	2.47817
C10	35	SPX2	2.84251	2.5072
C10	36	SPX2	2.87752	2.54193
C10	37	SPX2	2.88518	2.54931
C10	38	SPX2	2.91067	2.57452
C10	39	SPX2	2.93257	2.59613
C10	40	SPX2	2.9522	2.61549
C11	1	SPX2	0.322126	-0.0124236
C11	2	SPX2	0.326472	-0.00851611
C11	3	SPX2	0.333147	-0.00228096
C11	4	SPX2	0.337532	0.00166516
C11	5	SPX2	0.335435	-0.000870642
C11	6	SPX2	0.340454	0.00370887
C11	7	SPX2	0.336165	-0.00101898
C11	8	SPX2	0.334317	-0.00330605
C11	9	SPX2	0.338917	0.000854795
C11	10	SPX2	0.338772	0.000270067
C11	11	SPX2	0.340693	0.0017527
C11	12	SPX2	0.339137	-0.000242875
C11	13	SPX2	0.34	0.000180996
C11	14	SPX2	0.339882	-0.000376284
C11	15	SPX2	0.342878	0.0021803
C11	16	SPX2	0.339031	-0.00210546
C11	17	SPX2	0.341164	-0.000411621
C11	18	SPX2	0.345759	0.00374451
C11	19	SPX2	0.356162	0.0137078
C11	20	SPX2	0.373858	0.0309654
C11	21	SPX2	0.401014	0.0576819
C11	22	SPX2	0.454363	0.110592
C11	23	SPX2	0.565068	0.220858
C11	24	SPX2	0.746839	0.402189
C11	25	SPX2	1.04724	0.702155
C11	26	SPX2	1.45735	1.11183
C11	27	SPX2	1.89509	1.54912
C11	28	SPX2	2.22586	1.87946
C11	29	SPX2	2.38702	2.04018
C11	30	SPX2	2.51252	2.16524
C11	31	SPX2	2.6378	2.29008
C11	32	SPX2	2.72194	2.37378
C11	33	SPX2	2.80093	2.45233
C11	34	SPX2	2.84679	2.49775
C11	35	SPX2	2.88123	2.53175
C11	36	SPX2	2.90767	2.55775
C11	37	SPX2	2.94253	2.59217
C11	38	SPX2	2.94864	2.59784
C11	39	SPX2	2.97159	2.62036
C11	40	SPX2	2.98365	2.63197
C12	1	SPX2	0.342829	-0.0168474
C12	2	SPX2	0.35393	-0.00693365
C12	3	SPX2	0.358108	-0.00394306
C12	4	SPX2	0.363642	0.000402607
C12	5	SPX2	0.365691	0.00126465
C12	6	SPX2	0.367497	0.00188291
C12	7	SPX2	0.368419	0.00161736
C12	8	SPX2	0.36851	0.000520731
C12	9	SPX2	0.370226	0.0010486
C12	10	SPX2	0.370138	-0.000227314
C12	11	SPX2	0.369293	-0.00225964
C12	12	SPX2	0.376964	0.00422401
C12	13	SPX2	0.371526	-0.00240219
C12	14	SPX2	0.372567	-0.00254884
C12	15	SPX2	0.376561	0.000258046
C12	16	SPX2	0.377087	-0.00040415
C12	17	SPX2	0.375249	-0.00342922
C12	18	SPX2	0.383862	0.0039955
C12	19	SPX2	0.387618	0.00656376
C12	20	SPX2	0.403275	0.0210338
C12	21	SPX2	0.437639	0.0542096
C12	22	SPX2	0.493006	0.108389
C12	23	SPX2	0.593641	0.207837
C12	24	SPX2	0.781702	0.39471
C12	25	SPX2	1.087	0.698817
C12	26	SPX2	1.50343	1.11406
C12	27	SPX2	1.9223	1.53174
C12	28	SPX2	2.2491	1.85736
C12	29	SPX2	2.39419	2.00126
C12	30	SPX2	2.52983	2.13571
C12	31	SPX2	2.62788	2.23258
C12	32	SPX2	2.7289	2.3324
C12	33	SPX2	2.79171	2.39403
C12	34	SPX2	2.83819	2.43932
C12	35	SPX2	2.88774	2.48769
C12	36	SPX2	2.91288	2.51164
C12	37	SPX2	2.94623	2.5438
C12	38	SPX2	2.95618	2.55256
C12	39	SPX2	2.98048	2.57567
C12	40	SPX2	2.97765	2.57166
D1	1	SPX3	0.376001	-0.0103876
D1	2	SPX3	0.38457	-0.00209276
D1	3	SPX3	0.384355	-0.00258057
D1	4	SPX3	0.389532	0.00232263
D1	5	SPX3	0.386961	-0.000520777
D1	6	SPX3	0.388131	0.000375617
D1	7	SPX3	0.390409	0.00237985
D1	8	SPX3	0.386443	-0.00185872
D1	9	SPX3	0.388958	0.000382622
D1	10	SPX3	0.390648	0.00179954
D1	11	SPX3	0.392758	0.00363623
D1	12	SPX3	0.388756	-0.000639001
D1	13	SPX3	0.388489	-0.00117958
D1	14	SPX3	0.389599	-0.000342884
D1	15	SPX3	0.387933	-0.0022817
D1	16	SPX3	0.388489	-0.00199915
D1	17	SPX3	0.389206	-0.00155554
D1	18	SPX3	0.389976	-0.00105891
D1	19	SPX3	0.388093	-0.0032149
D1	20	SPX3	0.393606	0.00202488
D1	21	SPX3	0.391003	-0.000851727
D1	22	SPX3	0.39729	0.00516208
D1	23	SPX3	0.403665	0.0112638
D1	24	SPX3	0.417732	0.0250573
D1	25	SPX3	0.445153	0.0522046
D1	26	SPX3	0.500797	0.107575
D1	27	SPX3	0.60335	0.209856
D1	28	SPX3	0.783608	0.389841
D1	29	SPX3	1.07657	0.682532
D1	30	SPX3	1.45293	1.05862
D1	31	SPX3	1.76636	1.37177
D1	32	SPX3	1.98099	1.58613
D1	33	SPX3	2.1559	1.76076
D1	34	SPX3	2.29478	1.89937
D1	35	SPX3	2.41976	2.02407
D1	36	SPX3	2.49711	2.10116
D1	37	SPX3	2.57119	2.17497
D1	38	SPX3	2.61445	2.21795
D1	39	SPX3	2.66935	2.27258
D1	40	SPX3	2.71147	2.31442
D2	1	SPX3	0.292185	-0.00378612
D2	2	SPX3	0.29289	-0.00314627
D2	3	SPX3	0.297004	0.000902695
D2	4	SPX3	0.294643	-0.00152301
D2	5	SPX3	0.296159	-7.27198e-05
D2	6	SPX3	0.298529	0.00223254
D2	7	SPX3	0.299949	0.00358768
D2	8	SPX3	0.295493	-0.000933433
D2	9	SPX3	0.298767	0.00227451
D2	10	SPX3	0.294276	-0.00228132
D2	11	SPX3	0.295975	-0.000647502
D2	12	SPX3	0.297711	0.0010236
D2	13	SPX3	0.293585	-0.00316823
D2	14	SPX3	0.297498	0.000679602
D2	15	SPX3	0.293841	-0.00304245
D2	16	SPX3	0.296216	-0.000732446
D2	17	SPX3	0.295512	-0.00150153
D2	18	SPX3	0.295433	-0.00164534
D2	19	SPX3	0.294824	-0.0023204
D2	20	SPX3	0.295581	-0.0016278
D2	21	SPX3	0.300074	0.00280007
D2	22	SPX3	0.303335	0.00599547
D2	23	SPX3	0.312082	0.0146777
D2	24	SPX3	0.32675	0.0292803
D2	25	SPX3	0.357855	0.0603199
D2	26	SPX3	0.415131	0.117531
D2	27	SPX3	0.522706	0.225041
D2	28	SPX3	0.714569	0.416839
D2	29	SPX3	1.0113	0.713504
D2	30	SPX3	1.35043	1.05257
D2	31	SPX3	1.62117	1.32324
D2	32	SPX3	1.83584	1.53785
D2	33	SPX3	2.02461	1.72655
D2	34	SPX3	2.1562	1.85808
D2	35	SPX3	2.28684	1.98866
D2	36	SPX3	2.37411	2.07585
D2	37	SPX3	2.45166	2.15334
D2	38	SPX3	2.50899	2.21061
D2	39	SPX3	2.56275	2.26431
D2	40	SPX3	2.60537	2.30686
D3	1	SPX3	0.461616	0.000492741
D3	2	SPX3	0.467189	0.00586439
D3	3	SPX3	0.466748	0.00522181
D3	4	SPX3	0.463832	0.00210427
D3	5	SPX3	0.462091	0.00016285
D3	6	SPX3	0.460759	-0.00137049
D3	7	SPX3	0.463398	0.00106691
D3	8	SPX3	0.460931	-0.00160151
D3	9	SPX3	0.462455	-0.000278948
D3	10	SPX3	0.462591	-0.000344225
D3	11	SPX3	0.461188	-0.00194772
D3	12	SPX3	0.462111	-0.00122601
D3	13	SPX3	0.4592	-0.00433866
D3	14	SPX3	0.463419	-0.000321346
D3	15	SPX3	0.461069	-0.00287238
D3	16	SPX3	0.465632	0.00148954
D3	17	SPX3	0.462679	-0.00166433
D3	18	SPX3	0.461493	-0.00305175
D3	19	SPX3	0.4645	-0.00024671
D3	20	SPX3	0.466548	0.00160082
D3	21	SPX3	0.465931	0.000782613
D3	22	SPX3	0.472185	0.00683525
D3	23	SPX3	0.477743	0.0121915
D3	24	SPX3	0.489192	0.0234394
D3	25	SPX3	0.516644	0.0506904
D3	26	SPX3	0.570286	0.104131
D3	27	SPX3	0.652251	0.185895
D3	28	SPX3	0.807659	0.341101
D3	29	SPX3	1.00623	0.539474
D3	30	SPX3	1.24015	0.77319
D3	31	SPX3	1.42849	0.961329
D3	32	SPX3	1.58817	1.12081
D3	33	SPX3	1.77233	1.30477
D3	34	SPX3	1.91989	1.45213
D3	35	SPX3	2.06822	1.60025
D3	36	SPX3	2.17565	1.70748
D3	37	SPX3	2.266	1.79763
D3	38	SPX3	2.34064	1.87207
D3	39	SPX3	2.41231	1.94354
D3	40	SPX3	2.4731	2.00413
D4	1	SPX3	0.348781	-0.000823962
D4	2	SPX3	0.3514	0.00168586
D4	3	SPX3	0.352978	0.00315593
D4	4	SPX3	0.349918	-1.28739e-05
D4	5	SPX3	0.349628	-0.000412567
D4	6	SPX3	0.351265	0.00111577
D4	7	SPX3	0.35126	0.00100227
D4	8	SPX3	0.35078	0.000413899
D4	9	SPX3	0.347221	-0.0032538
D4	10	SPX3	0.351354	0.000770039
D4	11	SPX3	0.348657	-0.00203562
D4	12	SPX3	0.347596	-0.00320514
D4	13	SPX3	0.352186	0.00127619
D4	14	SPX3	0.348172	-0.00284677
D4	15	SPX3	0.349512	-0.00161541
D4	16	SPX3	0.35247	0.00123341
D4	17	SPX3	0.349418	-0.00192756
D4	18	SPX3	0.353365	0.00191076
D4	19	SPX3	0.355994	0.00443146
D4	20	SPX3	0.357339	0.00566752
D4	21	SPX3	0.371166	0.019386
D4	22	SPX3	0.38572	0.0338305
D4	23	SPX3	0.426991	0.0749933
D4	24	SPX3	0.494607	0.1425
D4	25	SPX3	0.621761	0.269546
D4	26	SPX3	0.846487	0.494163
D4	27	SPX3	1.17445	0.822014
D4	28	SPX3	1.56603	1.21349
D4	29	SPX3	1.84885	1.4962
D4	30	SPX3	2.05328	1.70052
D4	31	SPX3	2.19352	1.84065
D4	32	SPX3	2.33152	1.97854
D4	33	SPX3	2.44367	2.09059
D4	34	SPX3	2.52252	2.16933
D4	35	SPX3	2.58701	2.2337
D4	36	SPX3	2.63708	2.28366
D4	37	SPX3	2.67683	2.32331
D4	38	SPX3	2.69212	2.33849
D4	39	SPX3	2.73061	2.37687
D4	40	SPX3	2.74218	2.38833
D5	1	SPX3	0.332629	-0.00178081
D5	2	SPX3	0.334507	2.83254e-05
D5	3	SPX3	0.335952	0.00140446
D5	4	SPX3	0.336216	0.00159909
D5	5	SPX3	0.334077	-0.000608686
D5	6	SPX3	0.334825	7.00165e-05
D5	7	SPX3	0.334647	-0.000176464
D5	8	SPX3	0.336845	0.00195206
D5	9	SPX3	0.334234	-0.000727957
D5	10	SPX3	0.333801	-0.00122922
D5	11	SPX3	0.335496	0.000396871
D5	12	SPX3	0.332914	-0.00225406
D5	13	SPX3	0.333742	-0.00149537
D5	14	SPX3	0.333992	-0.00131437
D5	15	SPX3	0.333582	-0.00179369
D5	16	SPX3	0.333414	-0.00202992
D5	17	SPX3	0.33672	0.00120642
D5	18	SPX3	0.334723	-0.000859644
D5	19	SPX3	0.341512	0.00586047
D5	20	SPX3	0.346565	0.0108447
D5	21	SPX3	0.358252	0.0224624
D5	22	SPX3	0.380869	0.0450111
D5	23	SPX3	0.419512	0.0835846
D5	24	SPX3	0.503812	0.167816
D5	25	SPX3	0.653071	0.317006
D5	26	SPX3	0.910198	0.574064
D5	27	SPX3	1.27842	0.942212
D5	28	SPX3	1.68248	1.34621
D5	29	SPX3	1.96305	1.62671
D5	30	SPX3	2.17412	1.83771
D5	31	SPX3	2.32673	1.99025
D5	32	SPX3	2.44776	2.11122
D5	33	SPX3	2.56686	2.23024
D5	34	SPX3	2.63941	2.30272
D5	35	SPX3	2.6928	2.35604
D5	36	SPX3	2.74704	2.41021
D5	37	SPX3	2.78775	2.45086
D5	38	SPX3	2.81618	2.47922
D5	39	SPX3	2.84971	2.51268
D5	40	SPX3	2.87286	2.53576
D6	1	SPX3	0.403589	-0.00183639
D6	2	SPX3	0.409133	0.0035461
D6	3	SPX3	0.408835	0.00308644
D6	4	SPX3	0.407154	0.00124341
D6	5	SPX3	0.405122	-0.000950354
D6	6	SPX3	0.405337	-0.000896462
D6	7	SPX3	0.405514	-0.000880777
D6	8	SPX3	0.408421	0.00186447
D6	9	SPX3	0.405862	-0.000856588
D6	10	SPX3	0.409204	0.00232372
D6	11	SPX3	0.4038	-0.00324204
D6	12	SPX3	0.406922	-0.000281256
D6	13	SPX3	0.404821	-0.00254399
D6	14	SPX3	0.404319	-0.00320845
D6	15	SPX3	0.40614	-0.00154905
D6	16	SPX3	0.40667	-0.00118068
D6	17	SPX3	0.408468	0.000455475
D6	18	SPX3	0.41085	0.00267582
D6	19	SPX3	0.412276	0.00394031
D6	20	SPX3	0.419186	0.0106885
D6	21	SPX3	0.43352	0.0248614
D6	22	SPX3	0.453619	0.0447979
D6	23	SPX3	0.502889	0.0939064
D6	24	SPX3	0.589421	0.180276
D6	25	SPX3	0.745879	0.336573
D6	26	SPX3	1.00781	0.598345
D6	27	SPX3	1.37603	0.9664
D6	28	SPX3	1.75827	1.34848
D6	29	SPX3	2.00189	1.59194
D6	30	SPX3	2.19493	1.78482
D6	31	SPX3	2.34756	1.93728
D6	32	SPX3	2.4767	2.06626
D6	33	SPX3	2.5728	2.1622
D6	34	SPX3	2.6576	2.24684
D6	35	SPX3	2.70101	2.29009
D6	36	SPX3	2.7504	2.33931
D6	37	SPX3	2.78288	2.37163
D6	38	SPX3	2.80744	2.39604
D6	39	SPX3	2.83891	2.42734
D6	40	SPX3	2.85309	2.44136
D7	1	SPX3	0.286786	-0.00141082
D7	2	SPX3	0.291932	0.00351549
D7	3	SPX3	0.292243	0.00360637
D7	4	SPX3	0.289108	0.000251328
D7	5	SPX3	0.290014	0.000937869
D7	6	SPX3	0.289893	0.000596946
D7	7	SPX3	0.288852	-0.000663945
D7	8	SPX3	0.289863	0.000126785
D7	9	SPX3	0.286776	-0.00318051
D7	10	SPX3	0.29275	0.00257415
D7	11	SPX3	0.287542	-0.00285415
D7	12	SPX3	0.28772	-0.00289609
D7	13	SPX3	0.29132	0.000483953
D7	14	SPX3	0.291746	0.000689932
D7	15	SPX3	0.290053	-0.00122324
D7	16	SPX3	0.291254	-0.000241927
D7	17	SPX3	0.289859	-0.00185687
D7	18	SPX3	0.288948	-0.00298794
D7	19	SPX3	0.292098	-5.82989e-05
D7	20	SPX3	0.292269	-0.000106712
D7	21	SPX3	0.294817	0.0022214
D7	22	SPX3	0.297397	0.00458096
D7	23	SPX3	0.302138	0.00910195
D7	24	SPX3	0.313932	0.0206763
D7	25	SPX3	0.339228	0.0457528
D7	26	SPX3	0.378707	0.0850117
D7	27	SPX3	0.462758	0.168842
D7	28	SPX3	0.618925	0.32479
D7	29	SPX3	0.868424	0.574069
D7	30	SPX3	1.23312	0.938543
D7	31	SPX3	1.61334	1.31854
D7	32	SPX3	1.90396	1.60894
D7	33	SPX3	2.1215	1.82627
D7	34	SPX3	2.26991	1.97445
D7	35	SPX3	2.41867	2.12299
D7	36	SPX3	2.51099	2.2151
D7	37	SPX3	2.58829	2.29217
D7	38	SPX3	2.65966	2.36333
D7	39	SPX3	2.70929	2.41273
D7	40	SPX3	2.74852	2.45175
D8	1	SPX3	0.302006	-0.000475293
D8	2	SPX3	0.302451	-2.41844e-05
D8	3	SPX3	0.30077	-0.00169977
D8	4	SPX3	0.305212	0.00274834
D8	5	SPX3	0.304974	0.0025167
D8	6	SPX3	0.305674	0.00322238
D8	7	SPX3	0.304155	0.00170922
D8	8	SPX3	0.299864	-0.00257511
D8	9	SPX3	0.29682	-0.00561353
D8	10	SPX3	0.296748	-0.00567931
D8	11	SPX3	0.300733	-0.00168822
D8	12	SPX3	0.304736	0.00232116
D8	13	SPX3	0.304112	0.00170252
D8	14	SPX3	0.305149	0.00274601
D8	15	SPX3	0.300854	-0.00154348
D8	16	SPX3	0.302738	0.00034693
D8	17	SPX3	0.302292	-9.34091e-05
D8	18	SPX3	0.300973	-0.00140663
D8	19	SPX3	0.304765	0.00239217
D8	20	SPX3	0.303451	0.00108384
D8	21	SPX3	0.305926	0.00356461
D8	22	SPX3	0.298301	-0.00405442
D8	23	SPX3	0.305608	0.00325891
D8	24	SPX3	0.321095	0.018752
D8	25	SPX3	0.340611	0.0382743
D8	26	SPX3	0.381399	0.0790683
D8	27	SPX3	0.454849	0.152524
D8	28	SPX3	0.576791	0.274471
D8	29	SPX3	0.775743	0.47343
D8	30	SPX3	1.03292	0.730611
D8	31	SPX3	1.26266	0.960355
D8	32	SPX3	1.43815	1.13585
D8	33	SPX3	1.58693	1.28464
D8	34	SPX3	1.6998	1.39751
D8	35	SPX3	1.8102	1.50792
D8	36	SPX3	1.89183	1.58956
D8	37	SPX3	1.96031	1.65805
D8	38	SPX3	2.01087	1.70862
D8	39	SPX3	2.06454	1.76228
D8	40	SPX3	2.11196	1.80972
D9	1	SPX3	0.35924	0.00183585
D9	2	SPX3	0.357793	0.000339747
D9	3	SPX3	0.36019	0.00268713
D9	4	SPX3	0.358126	0.000573462
D9	5	SPX3	0.359517	0.00191513
D9	6	SPX3	0.356449	-0.0012023
D9	7	SPX3	0.357764	6.34324e-05
D9	8	SPX3	0.356	-0.00174953
D9	9	SPX3	0.359373	0.00157322
D9	10	SPX3	0.358664	0.000815025
D9	11	SPX3	0.356896	-0.00100262
D9	12	SPX3	0.356989	-0.000958387
D9	13	SPX3	0.359205	0.00120824
D9	14	SPX3	0.357255	-0.000791608
D9	15	SPX3	0.355523	-0.00257307
D9	16	SPX3	0.357493	-0.000652605
D9	17	SPX3	0.355695	-0.00250002
D9	18	SPX3	0.354395	-0.00384887
D9	19	SPX3	0.355723	-0.00257002
D9	20	SPX3	0.358409	6.60584e-05
D9	21	SPX3	0.358261	-0.000131499
D9	22	SPX3	0.359735	0.0012938
D9	23	SPX3	0.366276	0.00778502
D9	24	SPX3	0.376039	0.0174988
D9	25	SPX3	0.395764	0.0371741
D9	26	SPX3	0.429346	0.0707072
D9	27	SPX3	0.505829	0.147141
D9	28	SPX3	0.645254	0.286515
D9	29	SPX3	0.876467	0.51768
D9	30	SPX3	1.2317	0.872858
D9	31	SPX3	1.65091	1.29202
D9	32	SPX3	1.98719	1.62826
D9	33	SPX3	2.23142	1.87243
D9	34	SPX3	2.39079	2.03176
D9	35	SPX3	2.54388	2.1848
D9	36	SPX3	2.65133	2.29219
D9	37	SPX3	2.73032	2.37113
D9	38	SPX3	2.7914	2.43217
D9	39	SPX3	2.84656	2.48728
D9	40	SPX3	2.89199	2.53266
D10	1	SPX3	0.384613	-0.0055159
D10	2	SPX3	0.387634	-0.00270924
D10	3	SPX3	0.392945	0.00238645
D10	4	SPX3	0.393664	0.00289001
D10	5	SPX3	0.390873	-0.000116005
D10	6	SPX3	0.390906	-0.000298876
D10	7	SPX3	0.390884	-0.000535661
D10	8	SPX3	0.39051	-0.00112474
D10	9	SPX3	0.390681	-0.0011696
D10	10	SPX3	0.390139	-0.0019267
D10	11	SPX3	0.394555	0.00227399
D10	12	SPX3	0.388694	-0.00380258
D10	13	SPX3	0.390148	-0.00256347
D10	14	SPX3	0.394462	0.00153512
D10	15	SPX3	0.392406	-0.000735463
D10	16	SPX3	0.390594	-0.00276286
D10	17	SPX3	0.392032	-0.00153987
D10	18	SPX3	0.396041	0.00225393
D10	19	SPX3	0.399239	0.00523631
D10	20	SPX3	0.407239	0.0130211
D10	21	SPX3	0.422829	0.0283956
D10	22	SPX3	0.449794	0.0551458
D10	23	SPX3	0.500882	0.106019
D10	24	SPX3	0.609227	0.214148
D10	25	SPX3	0.787228	0.391934
D10	26	SPX3	1.0632	0.667688
D10	27	SPX3	1.38804	0.992316
D10	28	SPX3	1.66322	1.26728
D10	29	SPX3	1.83712	1.44096
D10	30	SPX3	2.01382	1.61744
D10	31	SPX3	2.16259	1.766
D10	32	SPX3	2.29638	1.89957
D10	33	SPX3	2.38783	1.99082
D10	34	SPX3	2.47734	2.08011
D10	35	SPX3	2.53815	2.1407
D10	36	SPX3	2.58569	2.18803
D10	37	SPX3	2.63142	2.23354
D10	38	SPX3	2.66347	2.26538
D10	39	SPX3	2.6954	2.29709
D10	40	SPX3	2.72189	2.32337
D11	1	SPX3	0.37605	-0.00303621
D11	2	SPX3	0.38195	0.00294431
D11	3	SPX3	0.376708	-0.00221635
D11	4	SPX3	0.383398	0.00455465
D11	5	SPX3	0.379446	0.000683032
D11	6	SPX3	0.381166	0.00248437
D11	7	SPX3	0.375687	-0.00291387
D11	8	SPX3	0.379689	0.00116869
D11	9	SPX3	0.378318	-0.000121422
D11	10	SPX3	0.376107	-0.00225116
D11	11	SPX3	0.377455	-0.000822462
D11	12	SPX3	0.377469	-0.000728138
D11	13	SPX3	0.377318	-0.000797637
D11	14	SPX3	0.376978	-0.00105713
D11	15	SPX3	0.373939	-0.00401557
D11	16	SPX3	0.377507	-0.000366695
D11	17	SPX3	0.379171	0.00137877
D11	18	SPX3	0.382733	0.00502091
D11	19	SPX3	0.387402	0.00977116
D11	20	SPX3	0.397809	0.0202588
D11	21	SPX3	0.416816	0.0393466
D11	22	SPX3	0.45317	0.0757816
D11	23	SPX3	0.527844	0.150536
D11	24	SPX3	0.660815	0.283588
D11	25	SPX3	0.887413	0.510267
D11	26	SPX3	1.23117	0.854105
D11	27	SPX3	1.61324	1.23626
D11	28	SPX3	1.90893	1.53202
D11	29	SPX3	2.08213	1.70531
D11	30	SPX3	2.23888	1.86214
D11	31	SPX3	2.36947	1.99281
D11	32	SPX3	2.4787	2.10212
D11	33	SPX3	2.56452	2.18802
D11	34	SPX3	2.62826	2.25184
D11	35	SPX3	2.6785	2.30216
D11	36	SPX3	2.70172	2.32546
D11	37	SPX3	2.73497	2.3588
D11	38	SPX3	2.77197	2.39588
D11	39	SPX3	2.79757	2.42155
D11	40	SPX3	2.80483	2.4289
D12	1	SPX3	0.90519	-0.0476066
D12	2	SPX3	0.932363	-0.0255585
D12	3	SPX3	0.949106	-0.0139418
D12	4	SPX3	0.961018	-0.00715536
D12	5	SPX3	0.971	-0.0022985
D12	6	SPX3	0.981004	0.00257981
D12	7	SPX3	0.989281	0.00573126
D12	8	SPX3	0.99559	0.0069151
D12	9	SPX3	1.00061	0.0068085
D12	10	SPX3	1.00598	0.00705154
D12	11	SPX3	1.01087	0.00682072
D12	12	SPX3	1.0122	0.00302042
D12	13	SPX3	1.0192	0.00489281
D12	14	SPX3	1.01799	-0.00144057
D12	15	SPX3	1.01985	-0.00470085
D12	16	SPX3	1.02491	-0.00476883
D12	17	SPX3	1.03222	-0.00258804
D12	18	SPX3	1.033	-0.00692621
D12	19	SPX3	1.03995	-0.00510306
D12	20	SPX3	1.05521	0.00503173
D12	21	SPX3	1.07165	0.0163444
D12	22	SPX3	1.11125	0.0508177
D12	23	SPX3	1.17718	0.111618
D12	24	SPX3	1.30762	0.236933
D12	25	SPX3	1.5244	0.448594
D12	26	SPX3	1.84578	0.764842
D12	27	SPX3	2.18024	1.09418
D12	28	SPX3	2.44703	1.35584
D12	29	SPX3	2.59526	1.49894
D12	30	SPX3	2.73604	1.63461
D12	31	SPX3	2.85866	1.7521
D12	32	SPX3	2.95692	1.84523
D12	33	SPX3	3.01816	1.90135
D12	34	SPX3	3.07875	1.95681
D12	35	SPX3	3.13194	2.00487
D12	36	SPX3	3.16042	2.02822
D12	37	SPX3	3.18981	2.05249
D12	38	SPX3	3.21571	2.07327
D12	39	SPX3	3.22531	2.07774
D12	40	SPX3	3.24954	2.09684
E1	1	SPX3	0.401744	-0.000457327
E1	2	SPX3	0.401391	-0.00175025
E1	3	SPX3	0.401729	-0.00235163
E1	4	SPX3	0.406964	0.0019441
E1	5	SPX3	0.408388	0.00242966
E1	6	SPX3	0.40508	-0.00181807
E1	7	SPX3	0.407719	-0.000118239
E1	8	SPX3	0.412853	0.00407613
E1	9	SPX3	0.407433	-0.00228312
E1	10	SPX3	0.410647	-8.37456e-06
E1	11	SPX3	0.411091	-0.000503367
E1	12	SPX3	0.414185	0.00165143
E1	13	SPX3	0.41406	0.000586612
E1	14	SPX3	0.413818	-0.00059428
E1	15	SPX3	0.416402	0.00105053
E1	16	SPX3	0.413808	-0.00248325
E1	17	SPX3	0.413104	-0.00412569
E1	18	SPX3	0.413701	-0.00446795
E1	19	SPX3	0.419169	6.03007e-05
E1	20	SPX3	0.419416	-0.000631655
E1	21	SPX3	0.428574	0.00758687
E1	22	SPX3	0.433838	0.011911
E1	23	SPX3	0.456854	0.033988
E1	24	SPX3	0.494798	0.0709929
E1	25	SPX3	0.574775	0.150031
E1	26	SPX3	0.713641	0.287957
E1	27	SPX3	0.948924	0.522301
E1	28	SPX3	1.27137	0.843804
E1	29	SPX3	1.56958	1.14108
E1	30	SPX3	1.79397	1.36453
E1	31	SPX3	1.96982	1.53944
E1	32	SPX3	2.12096	1.68965
E1	33	SPX3	2.26519	1.83293
E1	34	SPX3	2.36663	1.93344
E1	35	SPX3	2.45501	2.02087
E1	36	SPX3	2.5154	2.08032
E1	37	SPX3	2.56544	2.12943
E1	38	SPX3	2.6003	2.16335
E1	39	SPX3	2.64041	2.20252
E1	40	SPX3	2.67478	2.23595
E2	1	SPX3	0.345721	-0.00195748
E2	2	SPX3	0.346742	-0.00159114
E2	3	SPX3	0.349273	0.000284177
E2	4	SPX3	0.349485	-0.000158351
E2	5	SPX3	0.344623	-0.0056755
E2	6	SPX3	0.35426	0.00330654
E2	7	SPX3	0.35312	0.00151152
E2	8	SPX3	0.355541	0.00327788
E2	9	SPX3	0.352625	-0.000293384
E2	10	SPX3	0.358039	0.00446507
E2	11	SPX3	0.352755	-0.00147384
E2	12	SPX3	0.355106	0.000222424
E2	13	SPX3	0.354145	-0.00139369
E2	14	SPX3	0.353877	-0.00231612
E2	15	SPX3	0.354857	-0.00199145
E2	16	SPX3	0.356558	-0.000945593
E2	17	SPX3	0.3577	-0.000457991
E2	18	SPX3	0.358428	-0.000384999
E2	19	SPX3	0.354666	-0.00480283
E2	20	SPX3	0.358909	-0.00121397
E2	21	SPX3	0.368818	0.00804011
E2	22	SPX3	0.372802	0.0113688
E2	23	SPX3	0.392188	0.0300995
E2	24	SPX3	0.431388	0.0686443
E2	25	SPX3	0.502453	0.139055
E2	26	SPX3	0.630425	0.266371
E2	27	SPX3	0.857298	0.49259
E2	28	SPX3	1.19173	0.826366
E2	29	SPX3	1.5563	1.19028
E2	30	SPX3	1.82667	1.46
E2	31	SPX3	2.01208	1.64475
E2	32	SPX3	2.16251	1.79452
E2	33	SPX3	2.28834	1.91971
[truncated: 1,847 more rows]

## Sheet: BioGroup Analysis Result
Block Type	96alum
Chemistry	SYBR_GREEN
Experiment File Name	D:\ShuJu\LZM\spx1-5 zuzhi chyi biaoda.eds
Experiment Run End Time	2023-07-13 07:21:08 AM CST
Instrument Type	sds7500
Passive Reference	ROX
Biogroup Name	Target Name	Task	RQ	RQ Min	RQ Max	Cт Mean	ΔCт Mean	ΔCт SE	ΔΔCт
Analysis Type	Singleplex
Endogenous Control	SPX1
RQ Min/Max Confidence Level	95.0
Reference Biogroup Name

## Sheet: Technical Analysis Result
Block Type	96alum
Chemistry	SYBR_GREEN
Experiment File Name	D:\ShuJu\LZM\spx1-5 zuzhi chyi biaoda.eds
Experiment Run End Time	2023-07-13 07:21:08 AM CST
Instrument Type	sds7500
Passive Reference	ROX
Sample Name	Target Name	Task	RQ	RQ Min	RQ Max	Cт Mean	ΔCт Mean	ΔCт SE	ΔΔCт
root	SPX2	UNKNOWN	1	0.790849	1.26446	24.3039	4.0439	0.121928	0
strem	SPX2	UNKNOWN	245.566	210.14	286.964	23.5765	-3.89607	0.0809518	-7.93997
leafe	SPX2	UNKNOWN	647.362	536.3	781.423	24.6967	-5.29453	0.0977984	-9.33843
flower	SPX2	UNKNOWN	1734.58	1144.28	2629.41	23.7561	-6.71648	0.216158	-10.7604
fruit	SPX2	UNKNOWN	714.778	439.789	1161.71	25.4956	-5.43746	0.252367	-9.48135
seed	SPX2	UNKNOWN	57.3439	51.9164	63.3389	23.9383	-1.79767	0.0516671	-5.84157
root	SPX3	UNKNOWN	1	0.775106	1.29015	26.6783	6.4183	0.132376	0
strem	SPX3	UNKNOWN	906.232	710.283	1156.24	24.0672	-3.40543	0.126596	-9.82374
leafe	SPX3	UNKNOWN	625.723	543.267	720.694	27.1201	-2.87108	0.0734258	-9.28938
flower	SPX3	UNKNOWN	11047.1	6889.92	17712.7	23.4595	-7.01308	0.245318	-13.4314
fruit	SPX3	UNKNOWN	4778.61	2823.98	8086.15	25.129	-5.80407	0.273321	-12.2224
seed	SPX3	UNKNOWN	91.6989	69.1412	121.616	25.6354	-0.100531	0.14672	-6.51883
root	SPX4	UNKNOWN	1	0.724833	1.37963	20.1449	-0.115023	0.167221	0
strem	SPX4	UNKNOWN	26.35	20.2986	34.2055	22.6379	-4.83475	0.135577	-4.71973
leafe	SPX4	UNKNOWN	43.4575	26.9458	70.0872	24.4347	-5.55656	0.248355	-5.44153
flower	SPX4	UNKNOWN	87.6347	53.4936	143.565	23.9041	-6.56845	0.256491	-6.45343
fruit	SPX4	UNKNOWN	51.4763	31.1779	84.9902	25.1322	-5.80086	0.260544	-5.68584
seed	SPX4	UNKNOWN	6.61089	5.97888	7.30971	22.8961	-2.83987	0.0522138	-2.72485
root	SPX5	UNKNOWN	1	0.78022	1.28169	23.906	3.64598	0.128959	0
strem	SPX5	UNKNOWN	1.00833	0.714235	1.42352	31.1066	3.63401	0.179185	-0.011968
leafe	SPX5	UNKNOWN	1.02578	0.555247	1.89507	33.6005	3.60925	0.278253	-0.0367279
flower	SPX5	UNKNOWN	2.2202	1.47705	3.33724	32.9679	2.49529	0.211769	-1.15069
fruit	SPX5	UNKNOWN	0.232428	0.11838	0.456351	36.6842	5.75113	0.305853	2.10515
seed	SPX5	UNKNOWN	0.0521431	0.0346841	0.0783905	33.6433	7.90736	0.211854	4.26138
Analysis Type	Singleplex
Endogenous Control	SPX1
RQ Min/Max Confidence Level	95.0
Reference Sample	root
