# Supplementary material for: Genome-wide identification and characterization of SPXdomain-containing genes family in eggplant
Source: PeerJ journal article supplement (doi:10.7717/peerj.17341), 2024-05-28
Supplement: 1-16_SPX_in_different_tissues.zip [file spx16+actin +different tissues.xls]

## Sheet: Sample Setup
Block Type	96alum
Chemistry	SYBR_GREEN
Experiment File Name	D:\ShuJu\LZM\16+actin + plc 1-3 zuzhi.eds
Experiment Run End Time	2023-07-14 11:23:36 AM CST
Instrument Type	sds7500
Passive Reference	ROX
Well	Sample Name	Sample Color	Biogroup Name	Biogroup Color	Target Name	Target Color	Task	Reporter	Quencher	Comments
A1	root	RGB(132,193,241)			plc1	RGB(208,243,98)	UNKNOWN	SYBR	None
A2	root	RGB(132,193,241)			plc1	RGB(208,243,98)	UNKNOWN	SYBR	None
A3	root	RGB(132,193,241)			plc1	RGB(208,243,98)	UNKNOWN	SYBR	None
A4	root	RGB(132,193,241)			plc2	RGB(244,165,230)	UNKNOWN	SYBR	None
A5	root	RGB(132,193,241)			plc2	RGB(244,165,230)	UNKNOWN	SYBR	None
A6	root	RGB(132,193,241)			plc2	RGB(244,165,230)	UNKNOWN	SYBR	None
A7	root	RGB(132,193,241)			plc3	RGB(255,191,168)	UNKNOWN	SYBR	None
A8	root	RGB(132,193,241)			plc3	RGB(255,191,168)	UNKNOWN	SYBR	None
A9	root	RGB(132,193,241)			plc3	RGB(255,191,168)	UNKNOWN	SYBR	None
A10	root	RGB(132,193,241)			spx16	RGB(139,189,249)	UNKNOWN	SYBR	None
A11	root	RGB(132,193,241)			spx16	RGB(139,189,249)	UNKNOWN	SYBR	None
A12	root	RGB(132,193,241)			spx16	RGB(139,189,249)	UNKNOWN	SYBR	None
B1	strem	RGB(168,255,222)			plc1	RGB(208,243,98)	UNKNOWN	SYBR	None
B2	strem	RGB(168,255,222)			plc1	RGB(208,243,98)	UNKNOWN	SYBR	None
B3	strem	RGB(168,255,222)			plc1	RGB(208,243,98)	UNKNOWN	SYBR	None
B4	strem	RGB(168,255,222)			plc2	RGB(244,165,230)	UNKNOWN	SYBR	None
B5	strem	RGB(168,255,222)			plc2	RGB(244,165,230)	UNKNOWN	SYBR	None
B6	strem	RGB(168,255,222)			plc2	RGB(244,165,230)	UNKNOWN	SYBR	None
B7	strem	RGB(168,255,222)			plc3	RGB(255,191,168)	UNKNOWN	SYBR	None
B8	strem	RGB(168,255,222)			plc3	RGB(255,191,168)	UNKNOWN	SYBR	None
B9	strem	RGB(168,255,222)			plc3	RGB(255,191,168)	UNKNOWN	SYBR	None
B10	strem	RGB(168,255,222)			spx16	RGB(139,189,249)	UNKNOWN	SYBR	None
B11	strem	RGB(168,255,222)			spx16	RGB(139,189,249)	UNKNOWN	SYBR	None
B12	strem	RGB(168,255,222)			spx16	RGB(139,189,249)	UNKNOWN	SYBR	None
C1	leafe	RGB(223,221,142)			plc1	RGB(208,243,98)	UNKNOWN	SYBR	None
C2	leafe	RGB(223,221,142)			plc1	RGB(208,243,98)	UNKNOWN	SYBR	None
C3	leafe	RGB(223,221,142)			plc1	RGB(208,243,98)	UNKNOWN	SYBR	None
C4	leafe	RGB(223,221,142)			plc2	RGB(244,165,230)	UNKNOWN	SYBR	None
C5	leafe	RGB(223,221,142)			plc2	RGB(244,165,230)	UNKNOWN	SYBR	None
C6	leafe	RGB(223,221,142)			plc2	RGB(244,165,230)	UNKNOWN	SYBR	None
C7	leafe	RGB(223,221,142)			plc3	RGB(255,191,168)	UNKNOWN	SYBR	None
C8	leafe	RGB(223,221,142)			plc3	RGB(255,191,168)	UNKNOWN	SYBR	None
C9	leafe	RGB(223,221,142)			plc3	RGB(255,191,168)	UNKNOWN	SYBR	None
C10	leafe	RGB(223,221,142)			spx16	RGB(139,189,249)	UNKNOWN	SYBR	None
C11	leafe	RGB(223,221,142)			spx16	RGB(139,189,249)	UNKNOWN	SYBR	None
C12	leafe	RGB(223,221,142)			spx16	RGB(139,189,249)	UNKNOWN	SYBR	None
D1	flower	RGB(247,255,168)			plc1	RGB(208,243,98)	UNKNOWN	SYBR	None
D2	flower	RGB(247,255,168)			plc1	RGB(208,243,98)	UNKNOWN	SYBR	None
D3	flower	RGB(247,255,168)			plc1	RGB(208,243,98)	UNKNOWN	SYBR	None
D4	flower	RGB(247,255,168)			plc2	RGB(244,165,230)	UNKNOWN	SYBR	None
D5	flower	RGB(247,255,168)			plc2	RGB(244,165,230)	UNKNOWN	SYBR	None
D6	flower	RGB(247,255,168)			plc2	RGB(244,165,230)	UNKNOWN	SYBR	None
D7	flower	RGB(247,255,168)			plc3	RGB(255,191,168)	UNKNOWN	SYBR	None
D8	flower	RGB(247,255,168)			plc3	RGB(255,191,168)	UNKNOWN	SYBR	None
D9	flower	RGB(247,255,168)			plc3	RGB(255,191,168)	UNKNOWN	SYBR	None
D10	flower	RGB(247,255,168)			spx16	RGB(139,189,249)	UNKNOWN	SYBR	None
D11	flower	RGB(247,255,168)			spx16	RGB(139,189,249)	UNKNOWN	SYBR	None
D12	flower	RGB(247,255,168)			spx16	RGB(139,189,249)	UNKNOWN	SYBR	None
E1	fruit	RGB(180,255,0)			plc1	RGB(208,243,98)	UNKNOWN	SYBR	None
E2	fruit	RGB(180,255,0)			plc1	RGB(208,243,98)	UNKNOWN	SYBR	None
E3	fruit	RGB(180,255,0)			plc1	RGB(208,243,98)	UNKNOWN	SYBR	None
E4	fruit	RGB(180,255,0)			plc2	RGB(244,165,230)	UNKNOWN	SYBR	None
E5	fruit	RGB(180,255,0)			plc2	RGB(244,165,230)	UNKNOWN	SYBR	None
E6	fruit	RGB(180,255,0)			plc2	RGB(244,165,230)	UNKNOWN	SYBR	None
E7	fruit	RGB(180,255,0)			plc3	RGB(255,191,168)	UNKNOWN	SYBR	None
E8	fruit	RGB(180,255,0)			plc3	RGB(255,191,168)	UNKNOWN	SYBR	None
E9	fruit	RGB(180,255,0)			plc3	RGB(255,191,168)	UNKNOWN	SYBR	None
E10	fruit	RGB(180,255,0)			spx16	RGB(139,189,249)	UNKNOWN	SYBR	None
E11	fruit	RGB(180,255,0)			spx16	RGB(139,189,249)	UNKNOWN	SYBR	None
E12	fruit	RGB(180,255,0)			spx16	RGB(139,189,249)	UNKNOWN	SYBR	None
F1	seed	RGB(255,204,153)			plc1	RGB(208,243,98)	UNKNOWN	SYBR	None
F2	seed	RGB(255,204,153)			plc1	RGB(208,243,98)	UNKNOWN	SYBR	None
F3	seed	RGB(255,204,153)			plc1	RGB(208,243,98)	UNKNOWN	SYBR	None
F4	seed	RGB(255,204,153)			plc2	RGB(244,165,230)	UNKNOWN	SYBR	None
F5	seed	RGB(255,204,153)			plc2	RGB(244,165,230)	UNKNOWN	SYBR	None
F6	seed	RGB(255,204,153)			plc2	RGB(244,165,230)	UNKNOWN	SYBR	None
F7	seed	RGB(255,204,153)			plc3	RGB(255,191,168)	UNKNOWN	SYBR	None
F8	seed	RGB(255,204,153)			plc3	RGB(255,191,168)	UNKNOWN	SYBR	None
F9	seed	RGB(255,204,153)			plc3	RGB(255,191,168)	UNKNOWN	SYBR	None
F10	seed	RGB(255,204,153)			spx16	RGB(139,189,249)	UNKNOWN	SYBR	None
F11	seed	RGB(255,204,153)			spx16	RGB(139,189,249)	UNKNOWN	SYBR	None
F12	seed	RGB(255,204,153)			spx16	RGB(139,189,249)	UNKNOWN	SYBR	None
G1	root	RGB(132,193,241)			actin	RGB(243,124,98)	UNKNOWN	SYBR	None
G2	root	RGB(132,193,241)			actin	RGB(243,124,98)	UNKNOWN	SYBR	None
G3	root	RGB(132,193,241)			actin	RGB(243,124,98)	UNKNOWN	SYBR	None
G4	strem	RGB(168,255,222)			actin	RGB(243,124,98)	UNKNOWN	SYBR	None
G5	strem	RGB(168,255,222)			actin	RGB(243,124,98)	UNKNOWN	SYBR	None
G6	strem	RGB(168,255,222)			actin	RGB(243,124,98)	UNKNOWN	SYBR	None
G7	leafe	RGB(223,221,142)			actin	RGB(243,124,98)	UNKNOWN	SYBR	None
G8	leafe	RGB(223,221,142)			actin	RGB(243,124,98)	UNKNOWN	SYBR	None
G9	leafe	RGB(223,221,142)			actin	RGB(243,124,98)	UNKNOWN	SYBR	None
G10	flower	RGB(247,255,168)			actin	RGB(243,124,98)	UNKNOWN	SYBR	None
G11	flower	RGB(247,255,168)			actin	RGB(243,124,98)	UNKNOWN	SYBR	None
G12	flower	RGB(247,255,168)			actin	RGB(243,124,98)	UNKNOWN	SYBR	None
H1	fruit	RGB(180,255,0)			actin	RGB(243,124,98)	UNKNOWN	SYBR	None
H2	fruit	RGB(180,255,0)			actin	RGB(243,124,98)	UNKNOWN	SYBR	None
H3	fruit	RGB(180,255,0)			actin	RGB(243,124,98)	UNKNOWN	SYBR	None
H4	seed	RGB(255,204,153)			actin	RGB(243,124,98)	UNKNOWN	SYBR	None
H5	seed	RGB(255,204,153)			actin	RGB(243,124,98)	UNKNOWN	SYBR	None
H6	seed	RGB(255,204,153)			actin	RGB(243,124,98)	UNKNOWN	SYBR	None
H7
H8
H9
H10
H11
H12

## Sheet: Results
Block Type	96alum
Chemistry	SYBR_GREEN
Experiment File Name	D:\ShuJu\LZM\16+actin + plc 1-3 zuzhi.eds
Experiment Run End Time	2023-07-14 11:23:36 AM CST
Instrument Type	sds7500
Passive Reference	ROX
Well	Sample Name	Target Name	Task	Reporter	Quencher	RQ	RQ Min	RQ Max	Cт	Cт Mean	Cт SD	ΔCт	ΔCт Mean	ΔCт SE	HK Control ΔCт Mean	HK Control ΔCт SE	ΔΔCт	Automatic Ct Threshold	Ct Threshold	Automatic Baseline	Baseline Start	Baseline End	Efficiency	Tm1	Tm2	Tm3	Comments	HIGHSD	OUTLIERRG
A1	root	plc1	UNKNOWN	SYBR	None				25.4711	25.0844	0.336621							TRUE	0.311847	TRUE	3	20	1	78.9386				N	N
A2	root	plc1	UNKNOWN	SYBR	None				24.9247	25.0844	0.336621							TRUE	0.311847	TRUE	3	19	1	78.9386				N	N
A3	root	plc1	UNKNOWN	SYBR	None				24.8573	25.0844	0.336621							TRUE	0.311847	TRUE	3	19	1	78.9386				N	N
A4	root	plc2	UNKNOWN	SYBR	None	1	0.687193	1.4552	24.8698	24.8981	0.0260723		-0.18623	0.19493			0	TRUE	0.317382	TRUE	3	19	1	79.1279				N	N
A5	root	plc2	UNKNOWN	SYBR	None	1	0.687193	1.4552	24.9036	24.8981	0.0260723		-0.18623	0.19493			0	TRUE	0.317382	TRUE	3	19	1	79.1279				N	N
A6	root	plc2	UNKNOWN	SYBR	None	1	0.687193	1.4552	24.9211	24.8981	0.0260723		-0.18623	0.19493			0	TRUE	0.317382	TRUE	3	20	1	79.1279				N	N
A7	root	plc3	UNKNOWN	SYBR	None	1	0.671241	1.48978	26.3768	26.4498	0.124099		1.36545	0.207134			0	TRUE	0.248844	TRUE	3	21	1	79.5067				N	N
A8	root	plc3	UNKNOWN	SYBR	None	1	0.671241	1.48978	26.3795	26.4498	0.124099		1.36545	0.207134			0	TRUE	0.248844	TRUE	3	21	1	79.5067				N	N
A9	root	plc3	UNKNOWN	SYBR	None	1	0.671241	1.48978	26.5931	26.4498	0.124099		1.36545	0.207134			0	TRUE	0.248844	TRUE	3	21	1	79.5067				N	N
A10	root	spx16	UNKNOWN	SYBR	None	1	0.644376	1.55189	26.6285	26.4664	0.207678		1.38198	0.228359			0	TRUE	0.356445	TRUE	3	21	1	78.7492				N	N
A11	root	spx16	UNKNOWN	SYBR	None	1	0.644376	1.55189	26.2323	26.4664	0.207678		1.38198	0.228359			0	TRUE	0.356445	TRUE	3	20	1	78.5598				N	N
A12	root	spx16	UNKNOWN	SYBR	None	1	0.644376	1.55189	26.5382	26.4664	0.207678		1.38198	0.228359			0	TRUE	0.356445	TRUE	3	21	1	78.3704				N	N
B1	strem	plc1	UNKNOWN	SYBR	None				23.8607	23.9307	0.0740089							TRUE	0.311847	TRUE	3	18	1	78.9386				N	N
B2	strem	plc1	UNKNOWN	SYBR	None				23.9233	23.9307	0.0740089							TRUE	0.311847	TRUE	3	18	1	79.1279				N	N
B3	strem	plc1	UNKNOWN	SYBR	None				24.0082	23.9307	0.0740089							TRUE	0.311847	TRUE	3	18	1	79.3173				N	N
B4	strem	plc2	UNKNOWN	SYBR	None	0.217913	0.173433	0.273802	26.13	25.9427	0.191688		2.01194	0.118634			2.19817	TRUE	0.317382	TRUE	3	20	1	79.3173				N	N
B5	strem	plc2	UNKNOWN	SYBR	None	0.217913	0.173433	0.273802	25.9512	25.9427	0.191688		2.01194	0.118634			2.19817	TRUE	0.317382	TRUE	3	21	1	79.3173				N	N
B6	strem	plc2	UNKNOWN	SYBR	None	0.217913	0.173433	0.273802	25.7469	25.9427	0.191688		2.01194	0.118634			2.19817	TRUE	0.317382	TRUE	3	20	1	79.3173				N	N
B7	strem	plc3	UNKNOWN	SYBR	None	0.211048	0.191535	0.232549	27.544	27.5406	0.0463321		3.60981	0.0504116			2.24436	TRUE	0.248844	TRUE	3	22	1	79.6961				N	N
B8	strem	plc3	UNKNOWN	SYBR	None	0.211048	0.191535	0.232549	27.4926	27.5406	0.0463321		3.60981	0.0504116			2.24436	TRUE	0.248844	TRUE	3	22	1	79.6961				N	N
B9	strem	plc3	UNKNOWN	SYBR	None	0.211048	0.191535	0.232549	27.5851	27.5406	0.0463321		3.60981	0.0504116			2.24436	TRUE	0.248844	TRUE	3	22	1	79.6961				N	N
B10	strem	spx16	UNKNOWN	SYBR	None	0.181558	0.155884	0.211459	27.6441	27.7742	0.115543		3.84348	0.0792202			2.4615	TRUE	0.356445	TRUE	3	22	1	78.9386				N	N
B11	strem	spx16	UNKNOWN	SYBR	None	0.181558	0.155884	0.211459	27.8137	27.7742	0.115543		3.84348	0.0792202			2.4615	TRUE	0.356445	TRUE	3	22	1	78.7492				N	N
B12	strem	spx16	UNKNOWN	SYBR	None	0.181558	0.155884	0.211459	27.8649	27.7742	0.115543		3.84348	0.0792202			2.4615	TRUE	0.356445	TRUE	3	22	1	78.5598				N	N
C1	leafe	plc1	UNKNOWN	SYBR	None				23.326	23.323	0.0926939							TRUE	0.311847	TRUE	3	18	1	79.1279				N	N
C2	leafe	plc1	UNKNOWN	SYBR	None				23.4142	23.323	0.0926939							TRUE	0.311847	TRUE	3	18	1	79.3173				N	N
C3	leafe	plc1	UNKNOWN	SYBR	None				23.2289	23.323	0.0926939							TRUE	0.311847	TRUE	3	18	1	79.5067				N	N
C4	leafe	plc2	UNKNOWN	SYBR	None	0.209008	0.161422	0.270621	25.4078	25.3952	0.21324		2.07214	0.134243			2.25837	TRUE	0.317382	TRUE	3	20	1	79.5067				N	N
C5	leafe	plc2	UNKNOWN	SYBR	None	0.209008	0.161422	0.270621	25.6018	25.3952	0.21324		2.07214	0.134243			2.25837	TRUE	0.317382	TRUE	3	20	1	79.5067				N	N
C6	leafe	plc2	UNKNOWN	SYBR	None	0.209008	0.161422	0.270621	25.1759	25.3952	0.21324		2.07214	0.134243			2.25837	TRUE	0.317382	TRUE	3	20	1	79.5067				N	N
C7	leafe	plc3	UNKNOWN	SYBR	None	0.109543	0.0824268	0.145578	28.0982	27.8789	0.23859		4.55589	0.147781			3.19044	TRUE	0.248844	TRUE	3	23	1	79.8855				N	N
C8	leafe	plc3	UNKNOWN	SYBR	None	0.109543	0.0824268	0.145578	27.9136	27.8789	0.23859		4.55589	0.147781			3.19044	TRUE	0.248844	TRUE	3	23	1	79.8855				N	N
C9	leafe	plc3	UNKNOWN	SYBR	None	0.109543	0.0824268	0.145578	27.6249	27.8789	0.23859		4.55589	0.147781			3.19044	TRUE	0.248844	TRUE	3	22	1	79.6961				N	N
C10	leafe	spx16	UNKNOWN	SYBR	None	0.122105	0.10902	0.136761	27.7234	27.7388	0.0426086		4.41579	0.0589001			3.03381	TRUE	0.356445	TRUE	3	22	1	79.1279				N	N
C11	leafe	spx16	UNKNOWN	SYBR	None	0.122105	0.10902	0.136761	27.787	27.7388	0.0426086		4.41579	0.0589001			3.03381	TRUE	0.356445	TRUE	3	22	1	78.9386				N	N
C12	leafe	spx16	UNKNOWN	SYBR	None	0.122105	0.10902	0.136761	27.7061	27.7388	0.0426086		4.41579	0.0589001			3.03381	TRUE	0.356445	TRUE	3	22	1	78.7492				N	N
D1	flower	plc1	UNKNOWN	SYBR	None				22.4682	22.5049	0.0860874							TRUE	0.311847	TRUE	3	17	1	79.3173				N	N
D2	flower	plc1	UNKNOWN	SYBR	None				22.4432	22.5049	0.0860874							TRUE	0.311847	TRUE	3	17	1	79.5067				N	N
D3	flower	plc1	UNKNOWN	SYBR	None				22.6032	22.5049	0.0860874							TRUE	0.311847	TRUE	3	16	1	79.5067				N	N
D4	flower	plc2	UNKNOWN	SYBR	None	0.132186	0.120045	0.145554	25.2298	25.238	0.0103452		2.73313	0.0500602			2.91936	TRUE	0.317382	TRUE	3	20	1	79.5067				N	N
D5	flower	plc2	UNKNOWN	SYBR	None	0.132186	0.120045	0.145554	25.2496	25.238	0.0103452		2.73313	0.0500602			2.91936	TRUE	0.317382	TRUE	3	19	1	79.5067				N	N
D6	flower	plc2	UNKNOWN	SYBR	None	0.132186	0.120045	0.145554	25.2346	25.238	0.0103452		2.73313	0.0500602			2.91936	TRUE	0.317382	TRUE	3	20	1	79.5067				N	N
D7	flower	plc3	UNKNOWN	SYBR	None	0.246203	0.207674	0.291881	25.7591	25.8924	0.126688		3.38753	0.0884323			2.02208	TRUE	0.248844	TRUE	3	20	1	80.0749				N	N
D8	flower	plc3	UNKNOWN	SYBR	None	0.246203	0.207674	0.291881	25.9068	25.8924	0.126688		3.38753	0.0884323			2.02208	TRUE	0.248844	TRUE	3	20	1	80.0749				N	N
D9	flower	plc3	UNKNOWN	SYBR	None	0.246203	0.207674	0.291881	26.0113	25.8924	0.126688		3.38753	0.0884323			2.02208	TRUE	0.248844	TRUE	3	21	1	79.8855				N	N
D10	flower	spx16	UNKNOWN	SYBR	None	3.18843	2.76622	3.67507	22.165	22.214	0.0945112		-0.290863	0.0738092			-1.67284	TRUE	0.356445	TRUE	3	17	1	79.3173				N	N
D11	flower	spx16	UNKNOWN	SYBR	None	3.18843	2.76622	3.67507	22.1541	22.214	0.0945112		-0.290863	0.0738092			-1.67284	TRUE	0.356445	TRUE	3	16	1	79.1279				N	N
D12	flower	spx16	UNKNOWN	SYBR	None	3.18843	2.76622	3.67507	22.323	22.214	0.0945112		-0.290863	0.0738092			-1.67284	TRUE	0.356445	TRUE	3	16	1	78.7492				N	N
E1	fruit	plc1	UNKNOWN	SYBR	None				24.4688	24.5958	0.112578							TRUE	0.311847	TRUE	3	19	1	79.3173				N	N
E2	fruit	plc1	UNKNOWN	SYBR	None				24.6834	24.5958	0.112578							TRUE	0.311847	TRUE	3	19	1	79.5067				N	N
E3	fruit	plc1	UNKNOWN	SYBR	None				24.6352	24.5958	0.112578							TRUE	0.311847	TRUE	3	19	1	79.5067				N	N
E4	fruit	plc2	UNKNOWN	SYBR	None	0.359639	0.290186	0.445716	25.8786	25.885	0.156917		1.28915	0.1115			1.47538	TRUE	0.317382	TRUE	3	20	1	79.5067				N	N
E5	fruit	plc2	UNKNOWN	SYBR	None	0.359639	0.290186	0.445716	25.7313	25.885	0.156917		1.28915	0.1115			1.47538	TRUE	0.317382	TRUE	3	20	1	79.5067				N	N
E6	fruit	plc2	UNKNOWN	SYBR	None	0.359639	0.290186	0.445716	26.0449	25.885	0.156917		1.28915	0.1115			1.47538	TRUE	0.317382	TRUE	3	20	1	79.5067				N	N
E7	fruit	plc3	UNKNOWN	SYBR	None	0.264614	0.224266	0.31222	27.9418	27.8793	0.0974475		3.28349	0.0859647			1.91804	TRUE	0.248844	TRUE	3	23	1	80.0749				N	N
E8	fruit	plc3	UNKNOWN	SYBR	None	0.264614	0.224266	0.31222	27.9291	27.8793	0.0974475		3.28349	0.0859647			1.91804	TRUE	0.248844	TRUE	3	23	1	80.0749				N	N
E9	fruit	plc3	UNKNOWN	SYBR	None	0.264614	0.224266	0.31222	27.767	27.8793	0.0974475		3.28349	0.0859647			1.91804	TRUE	0.248844	TRUE	3	23	1	79.8855				N	N
E10	fruit	spx16	UNKNOWN	SYBR	None	0.261971	0.226116	0.303511	27.8439	27.9103	0.069814		3.3145	0.0764804			1.93252	TRUE	0.356445	TRUE	3	22	1	79.1279				N	N
E11	fruit	spx16	UNKNOWN	SYBR	None	0.261971	0.226116	0.303511	27.9831	27.9103	0.069814		3.3145	0.0764804			1.93252	TRUE	0.356445	TRUE	3	22	1	78.9386				N	N
E12	fruit	spx16	UNKNOWN	SYBR	None	0.261971	0.226116	0.303511	27.9039	27.9103	0.069814		3.3145	0.0764804			1.93252	TRUE	0.356445	TRUE	3	22	1	78.7492				N	N
F1	seed	plc1	UNKNOWN	SYBR	None				22.2685	22.2875	0.0649021							TRUE	0.311847	TRUE	3	17	1	79.3173				N	N
F2	seed	plc1	UNKNOWN	SYBR	None				22.3598	22.2875	0.0649021							TRUE	0.311847	TRUE	3	17	1	79.3173				N	N
F3	seed	plc1	UNKNOWN	SYBR	None				22.2343	22.2875	0.0649021							TRUE	0.311847	TRUE	3	17	1	79.5067				N	N
F4	seed	plc2	UNKNOWN	SYBR	None	0.297199	0.268467	0.329005	23.8256	23.8518	0.064507		1.56427	0.0528313			1.7505	TRUE	0.317382	TRUE	3	18	1	79.5067				N	N
F5	seed	plc2	UNKNOWN	SYBR	None	0.297199	0.268467	0.329005	23.8045	23.8518	0.064507		1.56427	0.0528313			1.7505	TRUE	0.317382	TRUE	3	18	1	79.5067				N	N
F6	seed	plc2	UNKNOWN	SYBR	None	0.297199	0.268467	0.329005	23.9253	23.8518	0.064507		1.56427	0.0528313			1.7505	TRUE	0.317382	TRUE	3	18	1	79.5067				N	N
F7	seed	plc3	UNKNOWN	SYBR	None	0.236736	0.108836	0.514939	24.9479	25.7316	0.696381		3.4441	0.403798			2.07865	TRUE	0.248844	TRUE	3	20	1	79.8855				Y	N
F8	seed	plc3	UNKNOWN	SYBR	None	0.236736	0.108836	0.514939	25.9679	25.7316	0.696381		3.4441	0.403798			2.07865	TRUE	0.248844	TRUE	3	21	1	79.8855				Y	N
F9	seed	plc3	UNKNOWN	SYBR	None	0.236736	0.108836	0.514939	26.2792	25.7316	0.696381		3.4441	0.403798			2.07865	TRUE	0.248844	TRUE	3	21	1	79.8855				Y	N
F10	seed	spx16	UNKNOWN	SYBR	None	0.235464	0.194035	0.28574	25.7468	25.7559	0.161629		3.4684	0.100559			2.08642	TRUE	0.356445	TRUE	3	20	1	79.1279				N	N
F11	seed	spx16	UNKNOWN	SYBR	None	0.235464	0.194035	0.28574	25.5991	25.7559	0.161629		3.4684	0.100559			2.08642	TRUE	0.356445	TRUE	3	19	1	78.9386				N	N
F12	seed	spx16	UNKNOWN	SYBR	None	0.235464	0.194035	0.28574	25.922	25.7559	0.161629		3.4684	0.100559			2.08642	TRUE	0.356445	TRUE	3	20	1	78.5598				N	N
G1	root	actin	UNKNOWN	SYBR	None	1	0.660008	1.51513	20.8144	20.6521	0.162878		-4.43224	0.215903			0	TRUE	0.181827	TRUE	3	16	1	80.4536				N	N
G2	root	actin	UNKNOWN	SYBR	None	1	0.660008	1.51513	20.6534	20.6521	0.162878		-4.43224	0.215903			0	TRUE	0.181827	TRUE	3	16	1	80.643				N	N
G3	root	actin	UNKNOWN	SYBR	None	1	0.660008	1.51513	20.4886	20.6521	0.162878		-4.43224	0.215903			0	TRUE	0.181827	TRUE	3	16	1	80.643				N	N
G4	strem	actin	UNKNOWN	SYBR	None	0.451239	0.40976	0.496916	20.6547	20.6465	0.0453201		-3.28421	0.050104			1.14804	TRUE	0.181827	TRUE	3	16	1	80.643				N	N
G5	strem	actin	UNKNOWN	SYBR	None	0.451239	0.40976	0.496916	20.6872	20.6465	0.0453201		-3.28421	0.050104			1.14804	TRUE	0.181827	TRUE	3	15	1	80.8324				N	N
G6	strem	actin	UNKNOWN	SYBR	None	0.451239	0.40976	0.496916	20.5977	20.6465	0.0453201		-3.28421	0.050104			1.14804	TRUE	0.181827	TRUE	3	16	1	80.643				N	N
G7	leafe	actin	UNKNOWN	SYBR	None	0.311487	0.273981	0.354126	20.5846	20.5735	0.0688548		-2.74949	0.0666662			1.68276	TRUE	0.181827	TRUE	3	16	1	80.643				N	N
G8	leafe	actin	UNKNOWN	SYBR	None	0.311487	0.273981	0.354126	20.6362	20.5735	0.0688548		-2.74949	0.0666662			1.68276	TRUE	0.181827	TRUE	3	16	1	80.643				N	N
G9	leafe	actin	UNKNOWN	SYBR	None	0.311487	0.273981	0.354126	20.4998	20.5735	0.0688548		-2.74949	0.0666662			1.68276	TRUE	0.181827	TRUE	3	16	1	80.643				N	N
G10	flower	actin	UNKNOWN	SYBR	None	0.348062	0.298002	0.40653	19.6666	19.5952	0.110089		-2.90966	0.0806859			1.52259	TRUE	0.181827	TRUE	3	15	1	80.4536				N	N
G11	flower	actin	UNKNOWN	SYBR	None	0.348062	0.298002	0.40653	19.6506	19.5952	0.110089		-2.90966	0.0806859			1.52259	TRUE	0.181827	TRUE	3	14	1	80.4536				N	N
G12	flower	actin	UNKNOWN	SYBR	None	0.348062	0.298002	0.40653	19.4684	19.5952	0.110089		-2.90966	0.0806859			1.52259	TRUE	0.181827	TRUE	3	15	1	80.0749				N	N
H1	fruit	actin	UNKNOWN	SYBR	None	2.6436	2.23335	3.12921	18.8048	18.7611	0.101794		-5.83475	0.0876274			-1.40251	TRUE	0.181827	TRUE	3	14	1	80.2643				N	N
H2	fruit	actin	UNKNOWN	SYBR	None	2.6436	2.23335	3.12921	18.8336	18.7611	0.101794		-5.83475	0.0876274			-1.40251	TRUE	0.181827	TRUE	3	14	1	80.4536				N	N
H3	fruit	actin	UNKNOWN	SYBR	None	2.6436	2.23335	3.12921	18.6447	18.7611	0.101794		-5.83475	0.0876274			-1.40251	TRUE	0.181827	TRUE	3	13	1	80.4536				N	N
H4	seed	actin	UNKNOWN	SYBR	None	0.0125116	3.91546e-07	399.801	18.8982	24.1759	9.33471		1.88834	5.38953			6.32059	TRUE	0.181827	TRUE	3	14	1	80.4536				Y	N
H5	seed	actin	UNKNOWN	SYBR	None	0.0125116	3.91546e-07	399.801	18.6755	24.1759	9.33471		1.88834	5.38953			6.32059	TRUE	0.181827	TRUE	3	14	1	80.4536				Y	N
H6	seed	actin	UNKNOWN	SYBR	None	0.0125116	3.91546e-07	399.801	34.9539	24.1759	9.33471		1.88834	5.38953			6.32059	TRUE	0.181827	TRUE	3	30	1	78.181				Y	Y
Analysis Type	Singleplex
Endogenous Control	plc1
RQ Min/Max Confidence Level	95.0
Reference Sample	root

## Sheet: Raw Data
Block Type	96alum
Chemistry	SYBR_GREEN
Experiment File Name	D:\ShuJu\LZM\16+actin + plc 1-3 zuzhi.eds
Experiment Run End Time	2023-07-14 11:23:36 AM CST
Instrument Type	sds7500
Passive Reference	ROX
Well	Cycle	1	2	3	4	5
A1	1	21197.5	4045.66	13587.5	97123.1	3255.09
A2	1	35113.1	5675.89	18823.6	123889	3180.36
A3	1	32244.8	5736.86	19592	118508	2806.97
A4	1	33322.5	6047.38	20393.2	114645	2883.39
A5	1	33633.5	5410.74	21774	124029	3323.94
A6	1	45956	8069.6	26123.1	138787	5764.73
A7	1	37234.4	6142.71	24574.5	136572	4080.46
A8	1	190040	30986.4	81343.9	431812	18696.9
A9	1	42538.3	6842.79	23258.9	129998	3915.19
A10	1	32037	6515.07	21941.4	133089	3758.72
A11	1	34100.2	5166.44	21023.2	140305	3353.31
A12	1	40392	6209.34	19932.9	140565	4005.41
B1	1	37581.1	5928.04	18607.4	123940	3671.01
B2	1	40417.6	6648.24	20534.4	125644	3626.67
B3	1	32602.9	5468.51	19018.1	110539	2849.63
B4	1	30773.9	5233.14	22273.2	124040	3588.88
B5	1	34064.6	5493.92	26300.8	150406	4311.65
B6	1	27197.5	4424	23765.5	129736	2952.03
B7	1	32408.4	5364.65	24318.5	131039	3840.84
B8	1	116103	17524	76846	427468	10729.8
B9	1	37330.1	6294.8	22933.6	126667	3522
B10	1	39817.3	6319.88	23752.6	136204	3427.86
B11	1	44303.8	7176.99	23946.2	145208	4629.15
B12	1	43936.2	7739.52	23295.5	152235	5588.67
C1	1	38999.8	6603.88	20218.1	128986	3104.23
C2	1	42647.1	6826	25038.6	153674	4150.85
C3	1	38250.2	5407.56	20878.1	120006	2995.82
C4	1	32609.6	5470.05	23903.9	127554	3184.24
C5	1	32302.2	5839.22	25831.8	129455	4032.26
C6	1	30616.3	5280.36	25393.5	130509	3353.29
C7	1	33536.1	5753.81	25961.1	133658	2785.24
C8	1	38098.2	6197.43	26464.2	135191	3595.24
C9	1	47362.9	9206.14	23996.2	119638	3930.81
C10	1	38639.1	7006.33	25187.2	138488	4051.56
C11	1	34196.3	6242.75	23711.7	142558	3092.38
C12	1	42845.2	6908.07	22947.1	147218	3082.14
D1	1	43736.9	7313.52	21524.9	133866	3118.1
D2	1	36529.6	6320.75	20924.2	122931	2801.36
D3	1	44778.9	7787.38	23949.7	126111	4958.07
D4	1	33679.7	6143.6	24692.4	126054	4836.59
D5	1	35414.4	5545.25	25674.8	130613	3046.7
D6	1	39217.3	7107.54	27025.3	131449	4833.87
D7	1	31289.4	5115.11	25789.6	128903	2990.15
D8	1	31399.7	6454.17	25704.1	127916	3264.17
D9	1	36269.9	6567.53	24093.2	127069	4354.94
D10	1	52069.4	9326.24	25627.2	132011	5084.73
D11	1	45740.2	7793.7	25265.8	142479	3829.32
D12	1	123885	16010	27758.6	147840	5997.99
E1	1	44748.4	6939.9	20545.7	128320	3761.21
E2	1	41263.9	7023.86	20352.5	115453	3549.06
E3	1	65896.5	8956.31	23964.7	124693	5656.2
E4	1	34276.8	5803.05	25344.9	131421	3679.16
E5	1	28416.5	4855.63	24571.1	126533	2762.23
E6	1	144369	23668.1	36041.7	142391	12162.3
E7	1	48943.4	8942.97	27057.4	128006	8137.76
E8	1	36288	7000.45	26011.4	128518	4633.43
E9	1	36776.4	8060.88	27437.4	129289	3286.77
E10	1	39188.6	6848.86	24400.1	129147	4455.61
E11	1	37538.9	6564.25	22668.7	129119	5772.26
E12	1	49469.2	8223.84	22999.9	137689	5304.13
F1	1	46888.6	8697.72	23313.1	141130	7740.7
F2	1	41317.3	6625.18	21399.1	126657	3134.26
F3	1	34021.5	5655.1	22627.1	127652	2848.91
F4	1	34501.4	5867.2	25280	132623	3225.53
F5	1	29731.2	4977.57	26129.1	136966	2931.27
F6	1	55384.2	10447.8	29203.9	134913	7382.36
F7	1	32692.1	5469.32	26746.9	135006	4037.33
F8	1	33338	5728.51	26272.5	135668	2874.9
F9	1	35638.5	6261.68	24291.5	128711	4545.78
F10	1	35034	6130.54	24768.9	136690	4959.38
F11	1	29662.4	4639.08	22134.9	132357	2851.55
F12	1	56280.9	10243.1	25769.5	154867	5241.29
G1	1	43920	7031.61	22140.3	147701	3869.01
G2	1	49678.1	8045.88	23249	140053	3503.92
G3	1	39265	6566.12	23152.2	133563	3242.12
G4	1	36205.4	6005.71	25261.7	141554	2788.44
G5	1	33715.1	5673.91	25596	139514	3377.86
G6	1	35705.2	6235.61	26717	141957	3092.65
G7	1	34129.2	5982.49	26404.8	141518	3085.68
G8	1	37791.6	6910.65	27549.7	146315	4261.49
G9	1	43478.7	7193.59	26280.7	144257	3644.19
G10	1	55573.4	10011.2	25994.9	142263	4006.44
G11	1	70885.3	12135.5	25924.3	144177	6856.08
G12	1	46371.4	7625.65	23720.8	157843	3483.64
H1	1	59688.2	10007.4	24444.5	158955	9293.62
H2	1	44111.9	7594.69	24619.5	159502	3949.32
H3	1	41769.8	7952.58	25745.7	150816	5244.01
H4	1	40283	7674.17	26279.7	147416	3190.27
H5	1	37724.8	6643.6	26671.6	150959	3180.53
H6	1	43353.9	7399.55	28028.5	154475	4613.81
H7	1	30768.5	6759.77	4008.02	5615.96	3009.92
H8	1	34329	5744.74	3869.19	6484.91	3538.81
H9	1	34139.6	5371.44	3671.85	6525.56	3023.08
H10	1	46157.3	10334	7655.3	10769.9	6619.24
H11	1	39587	6543.64	4026.78	6438.14	3524.75
H12	1	44283.3	5821.29	3576.45	6385.36	3357.66
A1	2	21058.5	4253.31	13743.1	97783.3	3157.06
A2	2	35534.8	5742.29	18647.4	123561	2970
A3	2	32378.4	5520.86	19276	118063	2730.7
A4	2	33159.9	6137.26	20445.7	114281	3057.6
A5	2	33936.9	5155.44	21907.7	124089	3718.81
A6	2	46649.4	8208.21	26310.1	139242	5478.06
A7	2	37721.7	6395.89	24611.7	136653	4193.83
A8	2	193688	31652.3	82565	431246	19414.2
A9	2	42392.1	6913.97	23533.8	129904	3665.98
A10	2	32388.5	6676.39	22098.1	132613	4140
A11	2	33576.3	5155.66	20959.6	139365	3844.63
A12	2	40829.8	6560.5	19825.8	140635	4187.41
B1	2	37074.2	6259.04	18429	123458	3889.24
B2	2	40458.6	7128.53	20419.7	124458	3461.17
B3	2	32672.7	5246.2	18831.2	109179	3118.66
B4	2	31257.2	5174.23	21844.2	122578	3369.97
B5	2	34170.3	5593.04	26198.4	149371	4043.75
B6	2	26984.1	4480.91	23602.4	128273	2705.43
B7	2	32604.9	5223.91	24000.5	129804	3910.07
B8	2	116686	17141	75677.9	423529	11716.4
B9	2	37693.1	6284.75	22841	125751	3268.72
B10	2	40831.1	6721.84	23731.7	134965	3045.78
B11	2	44598	7003.05	23811.7	143651	5227.28
B12	2	44392.3	8208.93	23411.5	152179	5771.39
C1	2	39622.1	6817.38	20295.2	129075	3423.85
C2	2	43185.8	7072.76	24920.1	152307	4783.69
C3	2	38319.7	5231.78	20948.9	119058	2820.32
C4	2	32837	5512.08	23698.9	126381	3467.14
C5	2	32240.5	5770.05	25622.2	128351	3966.06
C6	2	30608.3	5061.9	25207.4	129165	3190.85
C7	2	33573.1	5843.53	25803.3	132374	2391.11
C8	2	38071.8	6171.46	26004.2	134005	3598.84
C9	2	47041.1	8998.29	23307.9	116328	3809.29
C10	2	38634.1	7010.25	25187.2	137480	4417.53
C11	2	34826.2	6360.81	23597.2	141191	3199.5
C12	2	43977.5	7161.07	23094.5	147492	3642.86
D1	2	44271	7319.85	21390	133331	3250.82
D2	2	36819.5	6396.78	21035.1	122226	3463.4
D3	2	44295.1	7718.89	23974.1	124345	5057.08
D4	2	33609.4	6168.15	24345.9	124460	4855.63
D5	2	35195.5	5778.62	25491.7	129272	2969.81
D6	2	39345.4	7139.5	26740.9	130495	5250.57
D7	2	30890.4	5142.74	25514.7	127237	2972.84
D8	2	31437	6502.81	25716.2	126854	3830.11
D9	2	36120.5	6365.97	24061.6	125678	4257.38
D10	2	52087	9390.01	25454.7	131140	5128.27
D11	2	45841.8	7975.14	25359.6	141436	3752.17
D12	2	126466	16518	28067.9	148770	6261.32
E1	2	45047.5	6935.31	20481.3	127931	4245.79
E2	2	41012.1	7128.93	20421	114346	3706.54
E3	2	65788.6	8781.58	23903.1	123622	5911.21
E4	2	34103	6052.11	25082.7	130030	3459.43
E5	2	28296.5	4749.48	24272.4	124947	2669.55
E6	2	144319	23544.6	35995.3	141328	12223.7
E7	2	48928.8	8669.73	26796.5	126645	7644.54
E8	2	35918.7	6780.25	25835.1	126994	5269.71
E9	2	36838.8	8178.92	27424.7	128013	3547.66
E10	2	39062.8	6737.81	24202.4	127902	4248.11
E11	2	37540.9	6826.36	22699.3	128249	5619.32
E12	2	50038	8365.11	23195.2	138097	5252.73
F1	2	47538.6	9073.64	23475.4	141167	8027.77
F2	2	42189.8	6916.7	21287	125089	2995.28
F3	2	34267.7	6086.32	22398.6	126010	2835.39
F4	2	34497.5	5894.01	25002.2	131420	3793.41
F5	2	29764.4	4980	25903.7	135605	3094.07
F6	2	55537.3	10306.4	29112	133881	7491.57
F7	2	32477.1	5675.87	26447	134081	4132.14
F8	2	33229.3	5588.49	25975.3	134468	2844.39
F9	2	35664.1	5981.66	24206.2	127594	4519.4
F10	2	35340.8	6297.13	24365.3	135795	4694.68
F11	2	29900.3	4720.57	22027.1	131403	3049.54
F12	2	57582.7	10766.5	25922.6	155636	5525.12
G1	2	43672.9	7068.25	22039.2	147307	3893.5
G2	2	50212.2	8427.95	23124.2	138616	3332.17
G3	2	39292	6596.11	22905.6	132547	3021.61
G4	2	35801.5	5946.81	25118.1	140532	2750.05
G5	2	33612.6	5497.37	25419.2	138271	3063.1
G6	2	35719.9	6074.29	26528.5	140857	3283.99
G7	2	34102.3	5816.6	26317.5	140091	2901.36
G8	2	38197.8	7041.67	27235.2	145477	4119.89
G9	2	43445.6	7047.9	26120.8	143367	3739.67
G10	2	56560.2	10291.5	26045	141515	4524.76
G11	2	70900.4	12131	25759.8	143027	6844.09
G12	2	46600.1	7512.82	24016.9	157749	3615.96
H1	2	59468.5	10123.1	24217.5	159641	9095.22
H2	2	44270.3	7658.41	24721.3	158618	4144.14
H3	2	41697.5	8110.41	25504.5	149438	5312.39
H4	2	40539.9	7618.92	26227	147398	3243.05
H5	2	37864.6	6825.29	26736	150265	3152.76
H6	2	43923.4	7372.11	28096.8	154787	4668.88
H7	2	30747.5	6857.29	4317.64	5569.4	2801.96
H8	2	34615.1	5762.22	3800.45	6512.38	3691.02
H9	2	34538.1	5275.93	3741.7	6327.82	3234.83
H10	2	45994.8	10408.6	7765.7	10597.7	6519.64
H11	2	39959.8	6512.6	4139.51	6491.07	3711.98
H12	2	44656.8	5765.03	3541.14	5920.76	3426.85
A1	3	21376	4065.76	13780.8	97488.1	3040.29
A2	3	35467.1	5959.28	18469.7	122679	3246.79
A3	3	32643.9	5626.02	19219.9	117969	2360.6
A4	3	33767.9	6172.98	20505	114040	2941.46
A5	3	34100.4	5692.8	21927.4	123953	3660.86
A6	3	46914.7	8135.26	26214.4	138661	5649.64
A7	3	37973.4	6353.54	24749.7	136143	4335.54
A8	3	195152	32042.2	82366.9	429846	19659.4
A9	3	43524	6682.12	23497.1	129914	4028.92
A10	3	32653.4	6568.47	22047.8	132244	4568.81
A11	3	34312.1	5415.48	20783.7	138948	3188.37
A12	3	41189.1	6978.63	20140.1	140938	4220.11
B1	3	36872.4	6123.45	18374.4	122897	4132.85
B2	3	41160.6	7134.48	20377.3	123869	3171.87
B3	3	32653.6	5413.57	18985.2	109245	2731.63
B4	3	31216.3	5058.67	21907.3	122272	3695.64
B5	3	33826.9	5370.01	26048.9	148940	4018.41
B6	3	27153.1	4400.51	23624.9	128069	2721.75
B7	3	32627.5	5306.08	24140.1	129149	3922.5
B8	3	117189	17243.5	75891.8	421036	10424.4
B9	3	37931.6	6575.07	22818.6	125383	3522
B10	3	41288.8	6697.15	23631.4	134236	3501.91
B11	3	44815.5	7509.69	23822.1	143054	5167.24
B12	3	44815.9	8188.77	23397.7	151870	5661.76
C1	3	39761.1	6722.9	20450.7	128723	3687.39
C2	3	43153.2	7178.28	24637.5	152665	3887.17
C3	3	38461.1	5576.4	20883.9	118936	2590.83
C4	3	32970.3	5659.71	23509.5	125441	3237.15
C5	3	32274.2	5829.34	25357.8	127619	3978.1
C6	3	30805.5	5316.08	24933.2	128410	3134.69
C7	3	33615.6	5680.77	25775.7	131403	2469.44
C8	3	38202.3	6282.27	26041.4	133253	3418.18
C9	3	47512.3	8959.15	23085.4	114869	3777.79
C10	3	38781.4	7263.73	25186.2	137251	4117.2
C11	3	34872.8	6182.63	23633.2	141051	2965.37
C12	3	44257.4	7054.17	23186.7	147548	3397.47
D1	3	44213.6	7442.07	21574.9	133511	3149.84
D2	3	36987.7	6218.23	20858.1	122112	3026.78
D3	3	44355.1	7994.94	23985.7	124358	4760.04
D4	3	33454.5	6112.92	24331	124116	5132.67
D5	3	35288.7	5680.36	25397.1	128313	3071.67
D6	3	39424.7	6963.26	26718.1	129527	5197.8
D7	3	31336	5264.49	25476.4	126814	3048.46
D8	3	31366.4	6410.83	25619.3	126166	3113.13
D9	3	36413.8	6325.31	23786	125349	4201.9
D10	3	51946.1	9272.79	25424.1	130530	4836.05
D11	3	46295.8	7931.6	25350.3	141435	3558.26
D12	3	127806	16798.9	28223	148529	6220.58
E1	3	44433.8	7027.2	20516.2	127410	3725.55
E2	3	41060.8	7262.18	20347.2	114339	3678.38
E3	3	65154.6	8775.07	23902.2	123057	5866.98
E4	3	34176.4	5977.39	25138.6	129500	3681.04
E5	3	28303.8	4845.9	24234.6	124812	3082.8
E6	3	143411	23435	35648.8	140454	12275
E7	3	48895.5	8590.26	26802.1	125728	7778.97
E8	3	35866.3	7150.26	25732.4	126148	5070.1
E9	3	36507.1	7897.92	27269.6	127567	3167.08
E10	3	39049.7	6895.06	24141.9	127261	4504.27
E11	3	38005.6	6752.16	22772	128423	5785.64
E12	3	50462.9	8389.35	23040.6	138152	5377.91
F1	3	47560.8	8819.21	23445.3	140426	8513.88
F2	3	42768.6	7194.58	21381.9	124948	3247.69
F3	3	34206.8	5819.72	22426	125815	3150.73
F4	3	34390.4	5718.07	24949.4	131157	3434.24
F5	3	29599.9	4853.68	25986.9	135313	2581.93
F6	3	55375.2	10410	28998.3	133496	7280.33
F7	3	32800.7	5685.22	26536.5	133363	4283.02
F8	3	33271.1	5626.04	26115	133958	3045.62
F9	3	35508.2	6067.76	24154.1	127491	4459
F10	3	35489.2	6084.65	24384.2	135588	4814.37
F11	3	30213.7	5026.43	22054.8	130965	3060.49
F12	3	57928.1	11098.5	26046.2	155217	5631.86
G1	3	43879	7023.15	22017.1	146674	3948.91
G2	3	50351.8	8368.81	23072.3	138203	3133.07
G3	3	39603	6745.15	23003.7	132048	3014.53
G4	3	35864.1	5895.97	25087.6	140649	3010.6
G5	3	33642.8	5493.5	25346	138227	3224.03
G6	3	35685.3	6257.94	26577.7	140169	3014.48
G7	3	33993.3	6061.66	26115.3	139477	2750.76
G8	3	38372.9	7022.83	27183.6	144986	4678.65
G9	3	43348.1	7041.05	26163.8	142977	3882.46
G10	3	57070.3	10232.4	26027.1	141642	3947.83
G11	3	71117	12074.7	25848	143001	7019.53
G12	3	46366	7611.09	23841.5	157513	3574.89
H1	3	59645.8	9897.08	24485.4	159445	8944.88
H2	3	44260.9	7664.78	24591.4	158411	4081.89
H3	3	41265.2	7922.1	25489.1	148954	5120.7
H4	3	40697.2	7691.49	26166.4	146729	3182.15
H5	3	37614.7	6688.08	26740.5	149798	3167.02
H6	3	43988.6	7475.76	28072.1	154216	4441.74
H7	3	30656.9	6923.36	4271.75	5417.33	3130.57
H8	3	34406.8	5815.36	3795.58	6642.7	3464.49
H9	3	34610.9	5381.95	3657.19	6312.07	3394.07
H10	3	46389	10541.5	7941.58	10729.9	6432.99
H11	3	39910.3	6681.59	4147.17	6739.95	3846.21
H12	3	44894.8	5884.95	3511.27	5679.96	3808.08
A1	4	21361	4296.84	13626.8	97901.3	2779.37
A2	4	35361.6	5599.78	18835.9	122489	2999.06
A3	4	33103.3	5353.17	19261	118304	2930.75
A4	4	33737.2	5945.97	20495.9	113806	2980.52
A5	4	34145.5	5394.27	21952.2	123343	3452.62
A6	4	46924.6	8365.58	26349.8	138331	5410.06
A7	4	38182.2	6569.17	24704.7	135627	4303.42
A8	4	194951	32258.5	82576.7	430084	19481.6
A9	4	43495.2	7220.06	23590.8	129627	4243.52
A10	4	32867.1	6740.01	22137.3	131860	4483.72
A11	4	34054.4	5433.44	20895.9	137898	3368.41
A12	4	41524.7	6826.85	20320.9	141214	4360.88
B1	4	37649.1	5724.66	18190.6	122828	3561.05
B2	4	40604.6	7110.69	20285.3	123587	3746.56
B3	4	32653.6	5358.63	18850.2	109298	2479.12
B4	4	31455	4793.55	21973.8	122456	3767.89
B5	4	33890.7	5291.36	26185.4	148968	4679.7
B6	4	27195.6	4299.33	23590.2	127773	2884.03
B7	4	32365.8	5494.02	23927.2	129244	3597.62
B8	4	117218	17947.5	75996	420895	10784.8
B9	4	37852.1	6528.51	22690.4	125507	3407.79
B10	4	41757.2	6606.29	23685	134205	3244.23
B11	4	45478.3	7244.7	23883	143063	5323.12
B12	4	45349.8	8296.76	23338.3	151791	5838.86
C1	4	39852.5	6768.3	20418.5	128950	3714.31
C2	4	43678.2	6871.95	24690	152793	4070.9
C3	4	37959.4	5478.1	20786.4	118967	3075.7
C4	4	32796.9	5585.36	23629.1	125751	3502.77
C5	4	32308.9	5630.71	25317.5	127870	3678.18
C6	4	30332.5	5162.41	24969	128683	3094.94
C7	4	33934.2	5718.88	25784.1	131161	2368.03
C8	4	38002.7	6090.95	25894.5	133260	3801.07
C9	4	47452.9	9153.09	23037.5	114337	3789.49
C10	4	38769.6	7260.79	25284.2	137160	4661.18
C11	4	35397.2	6412.18	23720.4	140941	3169.69
C12	4	44394.7	7415.25	23065.7	146754	3386.8
D1	4	44553.5	7266.11	21339	133420	3345.08
D2	4	36855.5	6122.61	21051.9	122035	2992.86
D3	4	44332.7	7683.07	23813.3	124550	4550.43
D4	4	33358.3	6064.85	24270.6	124196	4636.74
D5	4	35284.3	5719.1	25313.5	128262	3159.55
D6	4	39281.4	7109.26	26678.8	129421	5094.99
D7	4	31249.3	5160.88	25250.8	126431	3083.08
D8	4	31173.7	6320.63	25394.8	125964	3277.22
D9	4	36528.7	6344.75	23809.2	125277	4172.25
D10	4	51880.3	9165.88	25404.9	130362	5050.86
D11	4	46383.6	8208.42	25366.8	141478	3790.75
D12	4	129022	17093.3	28125.6	149000	6621.04
E1	4	45021.1	7012.26	20519.5	127311	4058.04
E2	4	41360.2	6946.95	20434.7	114742	3815
E3	4	65201	8785.29	23850	123682	5850.04
E4	4	34425.2	5834.18	24998.3	129386	3583.38
E5	4	28305.5	4648.63	24153.5	124316	3253.96
E6	4	142817	22964.3	35467.7	140386	12066
E7	4	48580.7	8609.9	26573.2	125850	7951.27
E8	4	36016	6814.54	25691.8	125922	4859.92
E9	4	37061.6	7959.58	27343.1	127609	3478.46
E10	4	38568.4	6815.1	23970.3	127474	4340.84
E11	4	37908.7	6744.45	22694.5	128400	5619.32
E12	4	50780.9	8608.37	23113	137438	5232.83
F1	4	47360.5	8892.11	23283	140501	8655.5
F2	4	43432.1	7154.73	21276.9	124999	3464.34
F3	4	33903.2	5753.51	22234.7	125702	2954.32
F4	4	34579.9	5971.92	25049.9	131170	3360.32
F5	4	29590	4834.24	25871.3	134900	2780.34
F6	4	54956.8	10240.7	29119	133274	7351.27
F7	4	32653.3	5766.28	26380.1	133109	4087.62
F8	4	33145.5	5538.42	25957.6	133764	3022.53
F9	4	35469	5984.88	24044	127424	4301.6
F10	4	35139.6	6229.14	24469.8	135295	4818.73
F11	4	30537.4	5048.56	21915.2	130521	2780.9
F12	4	58453	11126.8	26057.7	154825	5639.31
G1	4	43731.4	7531.85	22251.9	146416	4036.55
G2	4	50410.2	8173.63	23054.6	137942	3753.34
G3	4	39372	6463.42	22887.9	131976	3142.05
G4	4	36064.5	5795.11	25112.5	140286	2982.83
G5	4	33253.9	5557.77	25270.5	137930	3083.61
G6	4	35626	5999.38	26461.1	140209	3091.91
G7	4	34175.9	5970.43	26027.2	139223	3311.58
G8	4	38386.7	7319.27	27310.9	144521	4464.14
G9	4	43434.6	7273.29	26068.3	142805	3908.74
G10	4	57219.5	10179.6	25953.7	141306	4328.78
G11	4	71285	12156.9	25890.5	142375	7187.33
G12	4	46844.8	7520.1	23757.2	157294	3328.5
H1	4	59838.6	10245.9	24446	159558	9433.12
H2	4	43774.9	7806.25	24555.2	157522	4167.19
H3	4	41595.1	7836.11	25251.9	148143	5389.07
H4	4	40746.6	7985.89	26092.9	146621	3482.58
H5	4	37823.7	7031.87	26595.4	149850	3096.46
H6	4	44197.7	7563.41	28231.1	153945	4474.63
H7	4	30803.7	6989.42	4330.87	5584.92	2803.54
H8	4	34571.8	6055.89	3884.47	6465.89	3629.57
H9	4	34635.2	5636.94	3576.99	6461.69	3275.08
H10	4	46690.7	10474	7802.83	11131.5	6475.82
H11	4	39872.9	6357.4	4076.03	6555.26	3530.39
H12	4	44422.2	5790.2	3484.11	6075.15	3284.24
A1	5	21171.2	4328.66	13718	97795.7	2782.25
A2	5	35350.3	5619.21	18426.8	122379	3209.43
A3	5	32909.5	5343.22	19354	118239	2324.34
A4	5	33862.6	6121.12	20344.1	113920	3214.91
A5	5	34451	5593.98	21825.8	123493	3319.03
A6	5	47165.7	8316.6	26206.9	138532	5673.71
A7	5	37895.2	6487.35	24529.4	135762	4331.77
A8	5	197929	32278.4	82398.9	429837	20290.8
A9	5	43668	7341.07	23656.9	129257	4122.87
A10	5	32478.9	6797.94	22069	131871	4250.52
A11	5	33961.4	5553.17	20825.4	138283	3246.45
A12	5	41426.2	7097.66	20133.2	141082	4006.83
B1	5	37306.8	6179.28	18207	122659	3468.01
B2	5	40868.7	6706.23	20309.3	123557	3811.71
B3	5	32863	5600.12	18903.2	109304	2611.27
B4	5	31293.5	5159.5	21906.2	122150	3612.61
B5	5	33675	5577.96	25972.3	148745	4152.36
B6	5	27005.3	4472.78	23482.4	127656	2721.75
B7	5	32344.1	5480.03	24121.9	129201	3823.97
B8	5	115758	18122.8	76170.5	420185	11585
B9	5	37904.8	6537.64	22726.9	125444	3498.97
B10	5	42254.5	6839.37	23730.7	134222	3491.05
B11	5	45679.1	7538.88	23901.4	142869	5141.83
B12	5	45130.7	8217.57	23260.9	151329	5931.63
C1	5	40469.8	6953.58	20233	129106	3491.14
C2	5	43414	6854.93	24823.7	152667	4868.75
C3	5	38128.5	5281.51	20801.5	119028	2657.2
C4	5	32573.7	5535.79	23723.3	125632	3206.92
C5	5	32400.5	5667.28	25352.6	127328	3721.32
C6	5	30599.5	5155.76	24808.3	128507	2973.12
C7	5	33564.7	5768.9	25630.4	131343	2449.66
C8	5	37871.3	6321.22	25856.4	133099	3393.91
C9	5	47311.1	9099.17	23004.9	114236	3934.41
C10	5	39013.8	7321.47	25102.3	137088	4218.64
C11	5	35150.8	6375.02	23723.6	140621	3148.7
C12	5	45179.1	7460.38	22936.7	146690	3666.57
D1	5	44318.5	7387.28	21470	133427	3173.88
D2	5	36755.7	6236.66	20905.2	122088	2764.15
D3	5	44136.6	7833.74	23812.2	124649	4901.19
D4	5	33289	6173.26	24485.8	124463	4845.05
D5	5	35396.8	5615.17	25391.1	128219	3206.48
D6	5	39309.4	7228.49	26589.2	129006	4940.32
D7	5	31041.3	5294.71	25307.4	126245	3012.93
D8	5	31164.6	6415.26	25454.4	125821	3250.18
D9	5	36332.5	6257.23	23977.2	125452	4156.94
D10	5	51854.3	9208.08	25429.8	130062	5085.7
D11	5	45951.8	7868.35	25299.8	141404	3786.58
D12	5	130463	17115.8	28613.7	148810	6640.92
E1	5	45610.8	6859.5	20490	127009	3687.79
E2	5	40855.5	7212.35	20344	114777	3581.39
E3	5	65015.5	8886.61	23782.8	123730	6116.34
E4	5	33950.4	5849.31	24983.7	129563	3397.45
E5	5	28190.4	4705.25	24284.4	124135	2969.32
E6	5	142331	23087.8	35724.3	139784	12559.2
E7	5	48693.5	8647.41	26767.3	125518	7920.03
E8	5	35982.8	6859.67	25758.8	125808	5005.79
E9	5	36648.4	7885.58	27279.6	127193	3447.6
E10	5	38704.7	6841.75	24041.7	126849	4529.97
E11	5	38032	6861.05	22874.4	128628	5838.21
E12	5	50935.2	8628.43	23045.5	137382	5013.14
F1	5	47639.5	8987.88	23498.9	140490	8744.81
F2	5	43562.7	7189.34	21550.6	125425	3399.96
F3	5	33943.2	5950.34	22375.5	126045	2914.68
F4	5	34652.9	5742.36	25014.1	131344	3562.95
F5	5	29867	5067.45	25882.1	134826	2834.61
F6	5	55004.6	10359.3	29220.3	133019	7203.8
F7	5	32595.8	5505.95	26450.2	133102	3945.82
F8	5	33243.2	5588.49	25983.4	133755	2737.18
F9	5	35387.7	5926.14	23977	127471	4242.89
F10	5	35527	6257.18	24398.7	135287	4720.02
F11	5	30599.5	5049.57	21869.7	131186	2785.88
F12	5	58729.7	11397.1	26059.3	155225	5688.13
G1	5	43567.6	6976.65	21922.4	146908	4164.15
G2	5	50684.4	8427.95	23097.7	137950	3386.87
G3	5	39549.9	6716.98	22994	132105	3108.4
G4	5	35578.4	5928.25	24993	140500	2826.01
G5	5	33621.4	5436.98	25416.9	138022	2919.53
G6	5	35669.3	6057	26471.3	140519	3022.67
G7	5	34401.7	5849.78	26152.8	139426	3153.14
G8	5	38401.3	7101.45	27407.4	144849	4549.77
G9	5	43754.1	7071.04	26117.3	142785	3793.98
G10	5	57195	10261.1	26166	141377	4231.71
G11	5	71689.4	12360.7	25864.4	142760	7445.58
G12	5	46711.1	7740.92	23834.7	157314	3564.62
H1	5	59956.2	10224.5	24441.3	160187	8937.13
H2	5	43973.6	7892.92	24675.6	157659	4216.76
H3	5	41097	7762.09	25247.8	148123	5075.11
H4	5	40948.4	7933.11	26162.4	146186	3200.01
H5	5	38013.3	6866	26642	149552	3386.96
H6	5	44495.9	7667.82	28042.1	153816	4555.69
H7	5	31031.3	7067.28	4295.86	5647.77	2930.54
H8	5	34525.1	5768.52	3866.41	6721.59	3549.53
H9	5	34661.1	5431.02	3684.79	6422.32	3455.32
H10	5	46580	10698.7	7773.52	10798	6465.86
H11	5	39783.7	6479.26	4103.39	6591.3	3815.75
H12	5	44646.9	6062.61	3512.63	5903.76	2948.19
A1	6	21361	4375.55	13639.4	97405.8	2952.36
A2	6	35350.3	6027.29	18517.2	122567	3274.47
A3	6	33210.8	5739.7	19400.5	117996	2718.2
A4	6	33654	6414.97	20333.9	113616	3127.28
A5	6	34429.6	5413.83	21938.8	123692	3390.74
A6	6	47361.6	8429.15	26280	138211	5620.35
A7	6	38247.6	6402.63	24628.3	135588	4652.04
A8	6	198753	32153.2	82366.9	428636	19515.3
A9	6	43977.7	7311.58	23685.4	129335	4133.74
A10	6	32800.2	6701.38	22121.6	131792	4430.67
A11	6	34181.8	5158.05	20895.9	138479	3872.51
A12	6	41346	7085.76	20219.4	140704	4134.8
B1	6	37109.3	6009.8	18359.9	122490	3939.99
B2	6	41296.7	6765.71	20589.6	123384	4155.75
B3	6	32382.5	5450.63	18848.9	109463	2875.59
B4	6	31198.7	5319.25	21806.4	122191	3619.08
B5	6	33704.7	5655.54	26059.5	148750	4400.94
B6	6	26939.7	4710.38	23514.3	127450	2491.46
B7	6	32506.2	5598.04	23980.6	129510	3483.11
B8	6	116403	17780.3	75784.9	420604	11395.7
B9	6	38019.7	6731.19	22951.4	125068	3175.69
B10	6	42386.1	6960.85	23613.5	134106	3417.99
B11	6	45979.8	7681.29	23761.2	143057	4905.12
B12	6	45476.4	8128.29	23180.8	151185	5706.74
C1	6	40385.9	7039.47	20392	129236	3338.62
C2	6	43523.8	6793.67	24972.6	152448	4195.08
C3	6	37823.8	5448.04	21020.9	118832	2162.21
C4	6	32765.1	5458.2	23550.5	125386	3257.67
C5	6	32035.2	5674.19	25313.4	127101	4123.54
C6	6	30495.2	5238	24937.6	128153	3010.27
C7	6	33672.7	5764.14	25709.8	131117	2695.36
C8	6	38014.6	6297.85	25946.2	133115	3679.73
C9	6	47365.4	9102.65	23049.3	114287	3931.71
C10	6	38546.2	7076.8	25042.3	137195	4293.22
C11	6	35014.6	6405.62	23614.7	140691	3210.55
C12	6	45321.6	7600.54	23369.9	146414	3433.03
D1	6	44872.5	7446.29	21583.9	133670	3257.56
D2	6	36703.6	6265.46	21018.3	122137	2882.33
D3	6	44364.3	7902.23	23782.6	124854	4598.88
D4	6	32936.9	6221.33	24288.6	124147	5047.02
D5	6	35201.7	5783.35	25304.5	127660	2923.88
D6	6	39271.8	6971.04	26632.2	129207	4959.42
D7	6	30967.5	5363.79	25135.8	125927	2826.16
D8	6	31082.4	6627.51	25479.6	125761	3242.72
D9	6	36591.3	6350.06	23810.1	124797	4483.11
D10	6	51682.8	9254.97	25428.9	130292	5172.78
D11	6	46086.2	8178.36	25325.6	141398	3665.64
D12	6	131904	17499.9	28601.4	149052	7013.56
E1	6	45698.4	7310.9	20620.9	127029	3819.95
E2	6	41148.6	7011.94	20285	114515	3349.86
E3	6	64918.3	8889.39	23747.4	123859	5875.45
E4	6	33956.2	5905.34	24961.7	129278	3410.6
E5	6	28294.1	4396.52	24432.8	124027	2920.15
E6	6	142050	23081.8	35520.5	139960	12076.1
E7	6	48290.3	8545.61	26654.2	125430	7610.46
E8	6	35887.1	6803.71	25524	125517	5037.47
E9	6	36799.7	7974.55	27168	127272	3211.97
E10	6	38633	6581.44	23933.3	126993	4311.46
E11	6	37824.6	6720.36	22853.4	128290	5711.08
E12	6	51109.3	8613.38	23137.5	137268	5167.34
F1	6	47816.1	9135.1	23412.6	140537	8776.71
F2	6	43858.4	7258.55	21579.9	124905	3339.67
F3	6	34088.5	5817.03	22440.2	125964	2936.3
F4	6	34487.2	5860.5	25000.5	131254	3482.94
F5	6	29759.1	4856.11	25798.9	134721	2682.83
F6	6	55270.6	10235.4	28978	133182	7264.38
F7	6	32778.4	5799.8	26343.8	132861	4148.63
F8	6	33357.1	5718.34	25940.6	133657	2929.33
F9	6	35239.3	6165.93	24076.3	127512	4466.65
F10	6	35843.1	6077.85	24409.9	135286	4668.48
F11	6	30604.6	4930.85	21935	130786	3060.49
F12	6	58962.4	11151.7	26029.9	154765	5868.52
G1	6	43893.7	7092.2	22015.8	146300	3937.31
G2	6	50701.1	8453.97	23198.2	137950	3567.37
G3	6	39793.5	6678.81	22913.5	132112	3128.77
G4	6	35550.2	5926.64	25125.3	140523	2811.31
G5	6	33472.4	5517.5	25308.7	137727	3168.02
G6	6	35458.2	6128.3	26450.8	140323	3153.7
G7	6	34302.6	5945.54	26149	139225	3085.68
G8	6	38276.9	7096.54	27232.7	144698	4634.56
G9	6	43154.1	7290.43	26073.5	142979	3744.93
G10	6	57562.8	10296.9	26123.9	141430	3998.2
G11	6	72324.3	12589.3	25866.5	142741	7634.09
G12	6	46819.4	7920.49	23762.9	157261	3203.03
H1	6	59574.5	10167.6	24279	159699	9112.27
H2	6	44031.3	7426.45	24430	157697	3964.31
H3	6	40906.1	7678.28	25256	147890	5110.34
H4	6	40929.8	7967.75	26312.4	146183	3262.54
H5	6	38168.7	6868.27	26600.6	149365	3352.43
H6	6	44613.6	7807.29	28105.1	153641	4757.59
H7	6	30858.4	6947.74	4237.52	5571.73	2947.21
H8	6	34360.8	5835.64	3981.68	6575.07	3603.12
H9	6	34526	5417	3805.52	6389.94	3135.95
H10	6	46462.1	10659.4	7877.09	10904.1	6763.65
H11	6	40085.2	6420.63	4198.62	6442.65	3604.83
H12	6	44567.6	5793.16	3437.95	5804.61	3217.88
A1	7	21297.1	4124.37	13769.8	97632.6	3399.25
A2	7	35593.2	5855.64	18607.6	122674	3148.53
A3	7	32562.5	5560.65	19158.4	118159	2586.91
A4	7	34032.9	6296.28	20487.9	113792	2703.9
A5	7	34367.6	5407.65	22040.3	123237	3124.55
A6	7	47588.3	8401.01	26185.4	138386	5636.04
A7	7	38103	6330.43	24679.2	135416	4563.23
A8	7	199466	32970	83118.8	429491	21047.8
A9	7	44275.9	7172.27	23495.1	129778	4319.66
A10	7	33542.5	6850.2	22079.1	131699	4593.13
A11	7	34110.3	5395.12	20929.5	138101	3490.37
A12	7	41592.2	7478.59	20140.1	140795	4129.11
B1	7	36947	6263.03	18217.9	122960	3640.56
B2	7	41114.7	7002.14	20565.5	123858	3654.03
B3	7	32181.3	5614.17	18836.3	109261	2424.84
B4	7	31212.8	5039.41	22032.3	122515	3514.47
B5	7	33973.3	5359.24	26292.5	148664	4288.72
B6	7	27189.2	4283.97	23510.5	128065	2789.74
B7	7	32609.4	5278.98	23975.2	128986	3570.99
B8	7	117401	17893.6	76193	421605	11850.8
B9	7	38008.2	6593.33	22776.5	125223	3603.05
B10	7	42213.9	6936.16	23698	134575	3485.12
B11	7	45872.3	7461.83	23953.1	143207	4794.27
B12	7	45242.7	8508.43	23455.7	151450	5844.48
C1	7	40878	7095.91	20527.9	129359	3359.92
C2	7	43317.9	7467.59	24894.8	153259	4189.98
C3	7	38295.4	5340.49	20909.5	118978	2872.07
C4	7	32602.2	5496.99	23770.9	125654	3398.04
C5	7	31866.5	5648.5	25438.3	127223	3878.79
C6	7	30679.7	5331.03	25007.4	128421	3212.45
C7	7	33422.7	5560.09	25603.7	131221	2397.71
C8	7	37960.9	6183.58	25929.9	133096	3881.96
C9	7	47141.3	8900.02	22963.3	114071	4011.82
C10	7	38642.1	7174.67	25079.3	137438	4498.09
C11	7	35246.2	6483.24	23647.4	140856	3122.2
C12	7	45285.7	7731.19	22965.5	146687	3677.23
D1	7	44787.5	7461.04	21668.9	133653	3250.82
D2	7	37070	6036.22	21012.7	122535	2947.99
D3	7	44124.4	7850.6	23784.7	124517	4959.12
D4	7	33317.9	6199.85	24454	124321	5076.63
D5	7	35374	5833.42	25282.6	128188	2997.77
D6	7	38990.8	6869.96	26722.7	129301	4941.23
D7	7	30945	5330.98	25224.3	126395	2869.89
D8	7	30981.8	6502.81	25229	125990	3226.87
D9	7	36116.7	6464.98	23803.6	125341	4529.98
D10	7	51954.4	9090.86	25494	130252	5196
D11	7	46217.5	8091.27	25226.6	141828	3822.02
D12	7	133061	17499.9	28711.2	148947	7114.91
E1	7	45494.3	7034.09	20530.4	127172	4149.29
E2	7	41586.6	7230.76	20260.8	114833	3675.25
E3	7	64740.9	9001.86	23816.4	123605	5663.73
E4	7	33953.7	5803.94	24850.7	129431	3573.99
E5	7	28423.8	4786.63	24127.7	124330	3027.95
E6	7	141885	23303.7	35440.4	139741	12099
E7	7	48273.3	8633.12	26602.4	125318	7911.5
E8	7	35830.6	6719.78	25684.3	125957	4883.91
E9	7	36699.9	8045.02	27158.9	127403	3620.59
E10	7	38433.9	6574.34	24028.1	126939	4675.04
E11	7	37933.2	6966.09	22851.5	128713	5946.22
E12	7	51393.7	8748.8	23406	137174	5356.36
F1	7	48068.4	9356.66	23467.5	141112	9005.09
F2	7	44261.7	7158.93	21539.5	124903	3492.96
F3	7	34120.7	5855.5	22422.5	126412	3114.69
F4	7	34782.1	5960.19	25067.8	131657	3319.45
F5	7	29943.3	4929.79	25794.8	134647	2578.53
F6	7	55202	10392.6	29101.1	133258	7141.62
F7	7	32792.8	5675.09	26418	133063	4049.7
F8	7	33193.3	5525.12	25817.1	133461	3020.05
F9	7	35366.6	5914.07	24126.8	127719	4629.15
F10	7	35636	6170.49	24275.3	135568	4740.98
F11	7	30794.9	4855.39	21928.1	131371	3022.68
F12	7	59684.3	11384.2	26082.3	154707	5817.22
G1	7	44073.5	7045.7	21982.1	146437	3655.07
G2	7	50875.2	8600.65	23130.8	138528	3555.34
G3	7	39702.7	6754.24	22967.4	132010	3237.7
G4	7	35660.6	5767.68	25086.8	140400	3019.58
G5	7	33585.3	5582.54	25365.5	137954	2866.68
G6	7	35459.5	6181.6	26416.4	140371	2831.33
G7	7	34122.1	6029.24	26208.7	139335	3043.33
G8	7	38651.6	7207.09	27335.9	144616	4691.37
G9	7	43301.5	7124.17	26137.1	142811	4155.77
G10	7	57647.1	10339	26008.3	141588	4638.31
G11	7	72415.8	12438.4	25911.2	142690	7351.87
G12	7	47028.1	7601.39	23791.4	156922	3492.76
H1	7	59962	10032.3	24502.8	159353	9327.72
H2	7	43401.7	7606.16	24473.3	157787	4094.57
H3	7	41349.3	7807.81	25236.5	147940	5255.4
H4	7	41225.6	7939.71	26310	146380	3500.45
H5	7	38222.2	6939.13	26727.1	149580	3253.34
H6	7	44445.7	7659.44	28112.6	153741	4691.82
H7	7	30565.6	7085.37	4375.21	5432.84	3068.66
H8	7	34581.2	5920.24	3862.94	6551.12	3840.38
H9	7	34314.6	5253.14	3610.63	6642.81	3400.2
H10	7	46539.4	10486.1	8094.98	10580.7	6441.95
H11	7	40299.9	6329.81	4129.66	6658.87	3614.98
H12	7	44532.9	5921.96	3588.67	5868.35	3318.13
A1	8	21654.1	4027.24	13744.7	97158.9	2623.68
A2	8	35403	5766.58	18744	122556	3742.25
A3	8	33090.3	5368.8	19270.6	117915	2148.05
A4	8	34359.2	6222.53	20519.9	113790	3213.85
A5	8	34666.4	5395.3	21832.1	123435	3499.77
A6	8	47996.7	8510.44	26336.9	138270	5845.29
A7	8	38157.6	6264.01	24731.1	135700	4245.79
A8	8	199976	32651.2	82853.5	429601	21427.9
A9	8	44320.8	7358.36	23381.1	129022	4150.56
A10	8	33243.5	6976.3	22081.3	131712	4422.93
A11	8	33895.6	5263.42	20981.5	137863	3561.22
A12	8	41513.8	6847.68	20198.5	140562	4751.89
B1	8	37199.3	6215.17	18043.1	123068	3530.6
B2	8	41621.4	7077.98	20378.7	123368	3596.69
B3	8	33079.2	5414.85	19061	109173	2821.31
B4	8	31283	5186.69	22002.5	122549	3416.34
B5	8	34237.4	5254.72	26138.3	148607	4347.85
B6	8	27300.9	4277.65	23548	127734	2682.76
B7	8	32628.4	5350.66	24052.2	129346	3469.8
B8	8	117419	17828.8	76418.2	421504	11346.8
B9	8	37770.7	6510.25	22658.6	125241	3691.47
B10	8	42354	7058.63	23769.5	134697	3543.37
B11	8	46279.2	7555.22	23979.5	143227	5139.53
B12	8	45604.6	8208.93	23367.3	151256	6198.7
C1	8	40831.6	7102.05	20441.5	129377	3350.95
C2	8	43793.1	7069.36	25153.7	153336	4552.33
C3	8	38243.2	5110.35	21047.6	118785	2311.83
C4	8	32686.9	5553.03	23311.2	125339	3429.35
C5	8	32403.4	5800.68	25405.3	126856	4269.98
C6	8	30460.8	5059.41	25047.6	128169	3001.63
C7	8	33579.3	5650.6	25688.9	130930	2524.69
C8	8	38082	6200.89	26001.5	133089	3855.9
C9	8	46995.2	8921.76	22911.8	114120	3894.8
C10	8	38863.5	7088.54	25105.3	137186	4420.52
C11	8	35530	6277.73	23698.6	140398	3072.5
C12	8	46136.8	7720.5	23215.5	146811	3696.2
D1	8	44902.3	7453.66	21648.9	133623	3427.79
D2	8	36632.8	6085.75	21048.6	122246	3288.31
D3	8	44481.1	7706.25	23954	124387	5140.3
D4	8	33461.3	6091.44	24376.6	124052	5038.56
D5	8	35233.3	5569.81	25291.6	127946	3212.47
D6	8	39229.4	7014.23	26576.4	128840	5125.01
D7	8	30816.5	5262.76	25277.3	126027	2963.73
D8	8	31163.8	6457.71	25392.9	125608	3280.02
D9	8	35953.2	6286.41	23770.2	124957	4382.68
D10	8	51632.7	9472.54	25463.4	130301	4637.7
D11	8	46468.3	8021.8	25263.7	141540	3925.24
D12	8	134084	17624.8	28785	149598	6906.24
E1	8	45703.2	7208.68	20466	126999	3843.02
E2	8	41332.7	7106.19	20398.9	114826	3876.53
E3	8	65118.9	8751.83	23891	123652	5794.52
E4	8	33797.9	5861.76	24815.9	129372	3430.32
E5	8	28424.6	4707.02	24330.5	123845	3221.81
E6	8	141658	23092.1	35493.2	139465	12288.8
E7	8	48505.3	8544.71	26553.5	125314	7808.32
E8	8	35683.3	6706.25	25579.6	125800	4683.34
E9	8	36789.7	8043.26	27153.5	127251	3185.78
E10	8	38440.9	6668.51	23962.2	126826	4389.5
E11	8	38138.6	6813.83	22840.9	128539	5879.31
E12	8	51853.1	8876.7	23191.2	137290	5360.5
F1	8	48270.2	9246.59	23598.3	140786	8874.95
F2	8	43863.6	7276.37	21348.6	124903	3499.09
F3	8	34262.5	5816.14	22449.1	126255	2958.82
F4	8	34772.6	5885.63	25061	131088	3336.84
F5	8	29759.1	5135.47	25828	134684	2745.57
F6	8	55214.5	10614.8	29024.8	133100	7081.84
F7	8	32607.3	5718.74	26325.2	133007	4002.7
F8	8	33387.9	5680.79	25946.3	133619	2996.96
F9	8	35365.1	5910.05	24076.3	127671	4509.19
F10	8	35525.3	6124.6	24271.9	135460	5099.16
F11	8	30806.3	5156.21	22098.3	130995	3458.47
F12	8	59372.8	11343.9	26086.4	154552	5781.64
G1	8	44089.6	7355.71	22203.9	146521	4089.39
G2	8	50809.6	8477.63	23147.4	138639	3456.88
G3	8	40089.2	6723.34	23038.2	132122	3051.72
G4	8	35623	6062.19	25127.8	140472	2928.92
G5	8	33423.7	5505.12	25371.7	137849	3321.06
G6	8	35812.4	6207.52	26398	139896	2908.02
G7	8	34129.2	5882.96	26016.4	139376	3262.95
G8	8	38770.6	7040.03	27141.2	144611	4579.45
G9	8	43331.2	7299	26167.2	143149	3690.61
G10	8	57576.9	10306.7	26151.6	141532	4383.73
G11	8	73010.1	12403.5	25936.2	142511	7220.02
G12	8	47061.5	7679.04	23972.5	157246	3622.8
H1	8	59815.5	10292.2	24357.8	158956	8875.13
H2	8	43914.6	7718.31	24444	157534	4234.05
H3	8	40897.5	7724	25187.3	147396	5063.71
H4	8	41296.1	7896.83	26128.9	146244	3774.9
H5	8	38128.5	6884.85	26699	149272	3567.12
H6	8	44744.7	7601.51	28064.6	153631	4580.93
H7	8	30823.9	7016.95	4376.77	5749.41	2967.06
H8	8	34389.9	5804.87	3886.55	6585.64	3704.6
H9	8	34704.5	5425.77	3593.38	6284.07	3342.45
H10	8	46629.8	10759.1	8053.94	10670.8	6726.8
H11	8	40344.6	6657.45	4234.74	6880.72	3655.59
H12	8	44567.6	5936.76	3417.58	6202.63	3296.95
A1	9	21314	4450.9	13670.8	97308	2811.08
A2	9	35126.3	5870.22	18632.1	123049	3358.9
A3	9	33005.6	5724.07	19441.5	118005	2603.17
A4	9	34506.4	6353.89	20507.3	114048	3332.1
A5	9	34585.2	5530.15	21887	123304	3491.91
A6	9	48107.9	8686.57	26245.6	138304	5487.48
A7	9	38216.5	6334.28	24667.5	135488	4638.82
A8	9	200434	33240.3	83261.5	428937	20729.1
A9	9	44649	7470.22	23521.5	129311	4226.7
A10	9	33226.4	6627.54	21988.4	131511	4692.59
A11	9	34067.3	5380.76	20775.6	137884	3603.04
A12	9	41957	7003.92	20155.4	140557	4242.86
B1	9	37556.9	6631.91	18177.8	122830	3380.04
B2	9	41378.7	7283.18	20701.4	123820	3514.6
B3	9	32656.3	5426.35	18958.7	109568	3162.32
B4	9	31515.9	4902.32	21981.9	122503	3684.86
B5	9	34146.1	5221.32	26161.9	148647	4029.27
B6	9	26970.2	4394.19	23618.3	127778	2473.32
B7	9	32753.4	5106.77	23943.5	128844	3676.62
B8	9	117171	17586.1	76077.6	421637	11380.4
B9	9	38162.4	6340.44	22776.5	125049	3159.12
B10	9	42555	6920.36	23749.6	134391	3543.37
B11	9	45833.9	7619.42	23762.3	143110	5149.92
B12	9	45854.5	8229.09	23645	151121	6195.88
C1	9	41105.8	7092.23	20427.7	128905	3433.94
C2	9	43350.5	7064.25	25121.5	152891	4819.41
C3	9	37893.3	5612.25	20925.7	118855	2938.45
C4	9	32957.6	5681.27	23476.2	125315	3150.77
C5	9	32121.9	5518.06	25215.3	127046	3881.8
C6	9	30363.7	5148.29	24922.7	128020	3228
C7	9	33821.6	5679.18	25573.7	130734	2748.13
C8	9	37895.2	6199.16	25916.3	132779	3695.91
C9	9	47137.9	9065.25	22892.8	114289	3506.85
C10	9	38848.7	7268.62	25239.2	137225	4283.28
C11	9	34982.9	6179.35	23756.3	141157	3116.67
C12	9	46249.8	7492.45	23054.2	146148	3859.79
D1	9	44695.9	7339.87	21567.9	133683	3162.34
D2	9	37194.1	6268.91	20989.2	122751	2888.9
D3	9	44202.7	7836.9	23766.8	124393	4761.1
D4	9	33284.2	6202.92	24214.5	124153	4731.91
D5	9	35326.5	5623.67	25098.5	127922	3036.72
D6	9	39147.7	7065.2	26608.4	129332	5110.45
D7	9	31380.2	5247.22	25141.2	126069	2886.29
D8	9	31171.2	6368.38	25333.3	125727	3422.67
D9	9	36132.6	6499.46	23639.4	125266	4280.33
D10	9	51935	9111.49	25378.1	130012	5055.7
D11	9	46490.5	7742.9	25336.9	141825	3736.53
D12	9	134827	17733	28750.9	148916	6896.3
E1	9	45662.4	7264.96	20486.8	127567	4049.65
E2	9	41469.1	7317.42	20515.9	114903	3510.47
E3	9	64766.7	9002.79	23683	123746	5961.08
E4	9	33764.4	5729.22	24959.8	128947	3514.83
E5	9	28157.1	4670.75	24294.6	124154	3165.07
E6	9	141873	23033.4	35415.9	139673	12232.8
E7	9	48396.6	8668.84	26618.4	124989	7949.37
E8	9	35793.1	6835.3	25503.3	125372	5029.79
E9	9	36825.5	7986.88	27131.7	126949	3510.25
E10	9	38245.2	6801.77	23908.1	126787	4442.75
E11	9	37995.8	6581.6	22831.4	128822	5702.48
E12	9	52025.5	8838.25	23203.4	137223	5094.38
F1	9	48743.6	9065.06	23478	140581	8812.43
F2	9	44467.6	7360.26	21599.1	125711	3395.87
F3	9	34357.3	5848.35	22305.6	126151	3064.24
F4	9	34821.7	5813.58	25028.6	131413	3405.55
F5	9	29645.1	4993.77	25795.6	134618	2722.68
F6	9	55180.6	10175.7	28964.8	133196	7093.79
F7	9	32694.3	5515.3	26342.2	132853	3918.61
F8	9	33620.7	5452.37	25730.7	133394	3259.21
F9	9	35288.3	6099.14	24129.2	127507	4702.32
F10	9	35392.8	6161.14	24380.7	135726	4999.57
F11	9	31113.5	4930.85	21991.4	131056	3065.46
F12	9	59852.9	11416	26129	154700	5890.87
G1	9	43911.2	6890.69	22159.8	146218	4317.51
G2	9	50953.9	8496.56	23370.6	138308	3748.97
G3	9	40175.5	6827.85	23101.8	132209	3349.28
G4	9	35879.8	5766.87	25038.7	140456	2886.45
G5	9	33331.4	5684.75	25252.6	138028	3065.47
G6	9	35496.8	6314.12	26424.4	140088	3075.53
G7	9	34016	5840.73	26041.7	139339	3321.78
G8	9	38309.9	7227.56	27290.9	144958	4595.56
G9	9	43400.7	6949.35	26086.4	143201	3701.13
G10	9	57528.6	10407.9	26097	141425	4505.52
G11	9	72770.3	12706.5	25951.5	142627	7623.19
G12	9	47334.3	7669.33	23928	156821	3468.81
H1	9	59647.8	10123.1	24308.9	159328	9279.67
H2	9	44062.2	7742.53	24432.3	157498	4202.93
H3	9	40967.6	7937.34	25343.3	147435	5123.81
H4	9	41249.1	8021.35	26234.2	146072	3530.49
H5	9	38334.5	6841.88	26640.5	149347	3229.32
H6	9	44871.3	7589.32	28017.3	153513	4689.53
H7	9	30588.8	6954.03	4239.85	5591.9	3054.37
H8	9	34369.6	5817.46	3937.94	6708.92	3425.18
H9	9	34622.2	5622.05	3637.36	6435.44	3471.95
H10	9	46620.6	10791.4	7922.04	10830	6549.52
H11	9	40331.3	6422.93	4297.12	6516.97	3813.5
H12	9	44375.9	5649.55	3573.73	6138.89	3182.58
A1	10	21304.6	4402.34	13587.5	97115.4	3161.39
A2	10	35758.8	6101.79	18789.9	122697	3594.17
A3	10	33504.1	5626.02	19258.2	117920	2594.41
A4	10	34201.8	6250.18	20611.1	113834	3120.94
A5	10	34312.3	5689.72	21848.6	123642	3118.65
A6	10	48226.7	8516.69	26175.8	137964	5516.77
A7	10	38121.2	6773.25	24706.7	135663	4584.96
A8	10	201285	33436.7	83162.5	429941	21697.6
A9	10	44570.7	7464.12	23570.4	128648	4409.66
A10	10	33381.2	6757.05	22013	131843	4695.91
A11	10	34146	5113.75	20916.8	137928	3665.76
A12	10	41694.4	7288.13	20049.7	140549	3631.46
B1	10	37793.9	6123.45	18236.1	122496	3989.05
B2	10	41480.4	7253.44	20527.3	124163	3661.85
B3	10	33065.5	5473.62	18987.8	109301	2997.12
B4	10	31174.1	5210.48	21932.6	122654	3821.81
B5	10	34017.3	5725.57	26051.2	148457	4552.99
B6	10	27238.1	4391.48	23494.6	127573	2869.53
B7	10	32508.9	5421.47	23943.5	128867	3527.5
B8	10	117516	17796.5	76010	420814	11991.3
B9	10	38008.2	6658.15	22730.7	125325	3441.87
B10	10	42386.1	6788.02	23609.6	134347	3734.91
B11	10	46033.5	7702.31	23969.2	143172	5327.74
B12	10	45914.6	8466.67	23153.1	150941	6035.65
C1	10	41032	7272.61	20469.2	129446	3684.03
C2	10	43988.7	6941.72	24837.2	153119	4630.58
C3	10	37874.8	5408.72	20872.3	119232	2732.58
C4	10	32559.9	5503.46	23423.1	125698	3494.14
C5	10	32020.7	5738.43	25337.2	127205	3887.82
C6	10	30672.4	5217.23	24850.2	128329	3132.1
C7	10	33674.2	5680.77	25755.7	130869	2560.97
C8	10	38089.7	6108.27	25939.8	132934	3557.49
C9	10	47054.6	8913.93	22937.1	114180	3850.7
C10	10	39101.7	7365.51	25103.3	137405	4206.7
C11	10	35263.2	6548.82	23522	140953	3186.25
C12	10	46664.5	7806.02	23222.4	146537	3590.7
D1	10	44785.3	7601.18	21664.9	133423	3333.54
D2	10	36758.1	6101.88	20960.1	122914	3197.49
D3	10	43860.2	7833.74	23889.4	124470	4907.51
D4	10	33396.8	5970.76	24336.3	124778	4822.85
D5	10	35697.5	5738.94	25185.1	127976	3033.72
D6	10	39249.4	7108.4	26627.6	128976	5066.78
D7	10	31160.2	5222.18	25083.7	126052	2900.87
D8	10	31520.1	6622.2	25353.8	125789	3545.74
D9	10	36394.2	6218.34	23720.1	125306	3909.21
D10	10	51552	9149	25394.4	130142	5145.69
D11	10	46109.5	7996.92	25432.7	141794	3881.45
D12	10	135718	17980.7	29024.3	149263	7397.12
E1	10	45969.9	7166.18	20612.2	127452	4150.34
E2	10	41305.2	7015.19	20551.7	114946	3704.45
E3	10	64740	8901.48	23871.4	123854	5913.09
E4	10	34046.7	5888.44	24841.6	128893	3576.81
E5	10	28299.8	4630.94	24256.8	124240	2917.31
E6	10	142037	23185.4	35423.2	139711	11989.9
E7	10	48361.7	8708.13	26413.1	125063	7904.88
E8	10	35607.6	6735.13	25427.9	125433	4762.99
E9	10	36520.4	7932.27	27064.6	127091	3273.68
E10	10	38465.3	6756.46	23808.7	126781	3904.74
E11	10	38065.2	6840.82	22722.3	128658	5924.23
E12	10	52161.7	8851.62	23056.1	136988	5686.31
F1	10	48716.9	9428.12	23445.3	141033	9122.47
F2	10	44412.2	7808.02	21602.1	125609	3217.04
F3	10	34005	5873.4	22483.6	126244	3172.36
F4	10	34916.9	5924.17	25019.2	131499	3475.12
F5	10	29880.6	5078.79	25832.2	134530	2865.98
F6	10	55392.5	10349.5	29168.9	133084	7287.5
F7	10	32766.2	5587.79	26377.6	133103	4331.66
F8	10	33122.8	5705.04	25830	133685	3134.68
F9	10	35280.7	6030.75	24025	127754	4359.45
F10	10	35452.3	6171.34	24357.6	135493	4678.96
F11	10	30547.8	4920.79	21968.7	131016	3114.22
F12	10	59892.3	11467.5	26210.8	154539	5803.98
G1	10	43950.7	7493.81	22014.5	146424	4139.66
G2	10	51162.5	8354.61	23221.4	138198	3479.85
G3	10	40282.5	6776.05	23099.2	132323	3128.77
G4	10	35634.7	5872.57	25109.3	140639	3027.75
G5	10	33307.8	5443.95	25215.3	137952	3204.31
G6	10	35526.8	6003.7	26344.5	140639	2915.46
G7	10	34183.7	5776.64	26011.1	138997	3157.85
G8	10	38469.6	7257.04	27385.8	144780	4435.31
G9	10	43586.3	7060.76	26129.4	142852	3992.84
G10	10	58117.7	10385.6	26031.6	141510	4073.29
G11	10	72799.3	12538.7	25988.5	143054	7916.31
G12	10	47631.2	7768.82	23723.1	157361	3788.2
H1	10	59881	10201.4	24154.5	158645	9090.57
H2	10	43811.2	7748.9	24397.2	156992	3973.53
H3	10	41210.2	7989.59	25262.2	147734	5474.03
H4	10	41455	7886.11	26150.4	146379	3632.8
H5	10	38423	6879.57	26582.1	149463	3398.97
H6	10	44703.5	7650.29	28096.8	153341	4779.77
H7	10	30820.9	7101.89	4356.54	5732.34	2995.63
H8	10	34512.9	5767.12	3887.25	6567.33	3776.78
H9	10	34617	5463.44	3624.42	6276.2	3423.82
H10	10	46432.7	10641.3	7910.31	10922.2	6444.94
H11	10	40637.7	6533.29	4132.95	6760.22	3384.89
H12	10	44615.5	5839.05	3541.14	5869.77	3426.85
A1	11	21622.2	4625.05	13711.7	97075	2982.63
A2	11	35335.3	6061.3	18745.5	122648	3131.92
A3	11	33512.2	5938.65	19325.3	118418	2591.91
A4	11	34753.5	6255.95	20620.3	113942	2925.62
A5	11	34567.2	5361.32	21963.6	123343	3485.03
A6	11	47942.8	8380.17	26458.3	138285	5690.44
A7	11	38362.2	6368.94	24757.6	135317	4791.87
A8	11	200873	33317.2	83177	430424	21133.7
A9	11	44471.7	7407.17	23660	129394	4256.37
A10	11	33465.1	7008.11	22404.9	131477	4712.49
A11	11	33730.9	5111.36	20890.1	137831	3997.95
A12	11	41953.4	6892.32	20105.3	140521	4528.66
B1	11	37456	6366.71	18296.1	122343	3555.97
B2	11	41737.9	7109.2	20550	123715	3922.48
B3	11	32408.6	5302.41	18918.3	109478	3004.2
B4	11	31141.4	5105.12	22095.4	122696	3086.35
B5	11	34051.4	5281.66	26188.9	148666	4084.78
B6	11	27235.3	4428.52	23533	127947	2797.9
B7	11	32343.2	5201.18	23964.3	129274	3668.63
B8	11	116323	17742.5	76184.6	421082	10653.5
B9	11	37863.6	6499.3	22721.3	125123	3405.95
B10	11	43008.5	7173.19	23578.8	134602	3419.96
B11	11	45970.8	7745.5	24184.1	143896	5529.81
B12	11	46359.3	8531.47	23379.7	150982	6119.98
C1	11	40896.7	7094.69	20478.4	129454	3559.55
C2	11	43920.1	6911.09	24942.2	153521	4337.98
C3	11	37668.5	5345.11	21030.2	118670	2716.83
C4	11	32630.8	5607.99	23337.8	125577	3493.06
C5	11	32341.7	5415.29	25285.5	127019	4051.32
C6	11	30702.1	5110.08	24978.6	128592	2992.99
C7	11	33573.1	5590.26	25544.4	130787	2401.01
C8	11	38299.5	6197.43	25909.9	133312	3643.78
C9	11	46888.2	8907.84	22881	114348	3685.07
C10	11	38797.3	7308.75	25223.2	137585	4103.27
C11	11	35374.5	6444.98	23710.6	141334	3104.52
C12	11	46262.7	8074.46	23178.7	146874	3857.42
D1	11	44886.8	7478.95	21557.9	133814	3434.52
D2	11	36819.5	6130.68	21078.8	122304	3157
D3	11	44214.9	7790.54	23779.5	124398	5243.53
D4	11	33092.7	6180.42	24511.2	124441	4705.47
D5	11	35363.4	5724.77	25360.3	128119	3071.67
D6	11	39341.4	7119.63	26702.5	128987	4761.08
D7	11	31277.4	5082.3	25145.8	125987	2981.04
D8	11	31153	6425.87	25398.5	125854	3054.39
D9	11	36186.8	6460.56	23818.5	124906	4141.64
D10	11	51833.9	9399.39	25286.1	130226	4784.77
D11	11	46189.9	7934.71	25457.5	141852	3867.9
D12	11	136266	18005	28891.8	149303	7205.34
E1	11	45817.3	7289.08	20631.8	127699	4013.99
E2	11	41205.7	7237.26	20566.5	114889	3577.22
E3	11	64466.2	8831.77	23893.8	124184	5678.78
E4	11	33867.2	5921.35	25097.3	129319	3693.25
E5	11	28354.9	4610.59	24247.6	124257	2867.19
E6	11	141639	23364.2	35339.5	139497	11630.6
E7	11	48408.8	8560.79	26423.5	124734	7581.11
E8	11	35778.2	6631.34	25530.6	125624	4821.53
E9	11	36630.9	8044.14	27215.2	127006	3429.84
E10	11	38394.6	6528.14	23946.9	126689	4117.74
E11	11	38079.9	6401.4	22952.9	128741	6060.92
E12	11	52434	8801.46	23122	137039	5331.49
F1	11	48621.9	9318.06	23534.2	140843	9487.37
F2	11	44426.8	7230.23	21652.6	125453	3272.22
F3	11	34089.4	5690.89	22283.4	126257	2751.6
F4	11	34863.7	5741.53	25013.3	131619	3615.13
F5	11	29729.7	4890.12	25816.4	134900	2516.64
F6	11	55264.4	10388.1	29191.5	132976	7061.91
F7	11	32521	5661.84	26427.6	132940	4217.06
F8	11	33505.4	5618.21	25786.4	133580	2707.49
F9	11	35283	6121.67	24073.8	127603	4244.6
F10	11	35633.4	6144.99	24454.4	135671	4508.61
F11	11	30866.3	4978.13	22098.3	131607	3154.01
F12	11	59842.8	11637.3	25960.3	154420	5771.71
G1	11	43892.2	6627.19	21957.4	146575	4278.85
G2	11	51250.8	8397.19	23379.4	138544	3494.08
G3	11	40419.1	6617.92	22991.3	132715	3190.76
G4	11	35594	5572.41	25090.8	140520	2987.73
G5	11	33459.1	5516.73	25279.9	137985	3044.17
G6	11	35363	6132.62	26486	140158	2966.09
G7	11	33984.1	5919.15	26189.6	139324	2986.07
G8	11	38444.3	7279.97	27156.1	144804	4428.52
G9	11	43100.7	7109.61	26088.1	143361	3906.99
G10	11	58073.8	10256.6	26213.5	141110	4121.82
G11	11	73027.5	12704.2	26209.6	142887	7527.3
G12	11	46926.4	7875.6	23673	156718	3756.26
H1	11	59776.9	10089.3	24176.6	158377	8960.38
H2	11	44035.4	7544.98	24461.6	157648	3943.56
H3	11	41382.7	7880.74	25154.4	147634	5146.61
H4	11	41588.7	8214.32	26241.4	146000	3342.11
H5	11	38501.1	6951.95	26679.8	149466	3329.16
H6	11	44920.1	7936.85	28072.1	153531	4534.28
H7	11	30765.5	6945.38	4313.75	5511.21	2858.31
H8	11	34610.3	5973.39	3936.55	6678.62	3688.16
H9	11	34539.9	5539.68	3625.29	6333.94	3370.45
H10	11	46414.4	10671.5	7830.19	10877.1	6628.2
H11	11	40149.2	6549.39	4154.84	6719.68	3823.65
H12	11	44833.7	5975.26	3571.01	6069.49	3361.9
A1	12	21569.5	4290.15	13634.7	96821.8	3328.61
A2	12	36133.5	6020.82	18820.6	122869	3621.85
A3	12	33499.2	5816.44	19284.2	118119	2929.5
A4	12	34454	6303.19	20707	114246	2719.74
A5	12	34351.8	5528.09	21953.3	123299	3442.8
A6	12	47582.8	8479.18	26203.7	138299	5813.9
A7	12	38408.2	6513.34	24734.1	135283	4399.79
A8	12	201024	33533.5	83168.3	429163	21069.3
A9	12	44799.9	7441.75	23612.1	129204	4451.19
A10	12	33386.4	6941.08	22123.9	131267	4546.71
A11	12	34194.7	5296.94	20713.1	137974	3433.45
A12	12	42143.1	6770.31	20176.3	140757	4097.83
B1	12	37499.9	6173.3	18199.7	122586	3468.01
B2	12	41611.6	7180.58	20428.2	123911	3908.15
B3	12	32696	5473.62	18798.4	109674	2613.63
B4	12	31146	5041.67	21972.7	122473	3343.01
B5	12	34136.2	5405.57	26113.6	148591	4124.6
B6	12	27136.5	4313.78	23395.2	127628	2359.09
B7	12	32377.6	5225.66	23869.2	129166	3687.27
B8	12	117148	17459.3	75965	421264	11820.2
B9	12	37926.8	6513.91	22776.5	125198	3492.53
B10	12	42632	6856.16	23844	134051	3551.27
B11	12	46196	7730.32	24116.3	143160	5384.32
B12	12	46380.4	8406.2	23350.7	151170	6186.05
C1	12	41085.8	7329.05	20653.5	129303	3601.04
C2	12	43765.6	6871.95	25104.6	153410	4992.93
C3	12	37677.8	5345.11	21055.7	118992	2510.96
C4	12	32602.2	5543.33	23404.2	125323	3100.02
C5	12	32481.5	5673.2	25319.6	126966	3786.51
C6	12	30780.7	4971.36	25047.6	128290	3110.5
C7	12	33667.3	5638.69	25587.9	130747	2291.35
C8	12	38163.1	6366.24	25927.1	132983	3546.71
C9	12	47052.9	8827.84	22831.3	113959	3983.01
C10	12	39377.5	7051.35	25072.3	137482	4357.86
C11	12	35530	6425.3	23847.9	140942	2949.91
C12	12	46452.7	7671.81	23137.2	146439	4245.06
D1	12	44751.1	7566.4	21545.9	133709	3165.22
D2	12	37289.2	6123.77	21007.1	122624	3116.51
D3	12	44398.8	7785.27	23950.8	124672	4928.58
D4	12	33375.6	6225.42	24351.2	124137	4605.02
D5	12	35196.4	5682.25	25523.5	127693	3140.57
D6	12	39441.5	7244.04	26641.3	128858	5135.93
D7	12	31108	5206.64	25259.9	125582	2893.58
D8	12	31091.5	6377.23	25283.9	125267	3380.71
D9	12	36025.2	6245.74	23756.3	124947	4171.29
D10	12	51792.2	9153.69	25329.2	130186	5353.72
D11	12	46338.1	8297.59	25521.4	141635	3822.02
D12	12	136944	18026.5	28992.1	149197	7266.95
E1	12	46041.9	7225.91	20640.6	127481	4146.14
E2	12	41254.4	7073.69	20383	115054	3777.46
E3	12	64960.2	8820.61	23863.9	123883	6103.16
E4	12	33884.4	5672.3	25067.1	129020	3391.82
E5	12	28487	4797.25	24106.5	123825	2779.25
E6	12	141938	23161.2	35475.9	139741	11921.2
E7	12	48399	8592.93	26469.6	124911	7387.98
E8	12	35882.1	7085.28	25325.1	125149	5034.59
E9	12	36492.9	8018.6	27106.3	127042	3580.38
E10	12	38427.8	6664.07	23901.7	126740	4293.1
E11	12	38056.4	6979.58	22929.9	128601	6190.91
E12	12	52519.3	8930.2	23212.3	137071	5329.83
F1	12	48863.8	9422.41	23680.8	140725	9236.02
F2	12	44545.9	7473.51	21674.8	125392	3391.79
F3	12	33923.2	5872.5	22457.9	126088	2648.89
F4	12	34982.6	5874.74	25039.7	131507	3240.31
F5	12	29449.7	4983.24	25830.5	134776	2868.52
F6	12	55338.5	10234.7	29023.2	133351	7156.77
F7	12	32638.2	5618.97	26409.9	132641	4024.97
F8	12	33022.1	5378.06	25898.6	133504	2889.75
F9	12	35031.4	5823.96	23993.5	127510	4235.24
F10	12	35756.7	6233.39	24449.3	135680	4826.6
F11	12	30796	4978.13	22037	131309	3068.45
F12	12	59983.9	11715.4	26104.4	154620	6018.3
G1	12	43803	7238.75	22080.7	146906	3957.94
G2	12	51111.3	8275.36	23256.8	138477	4016.98
G3	12	40299.6	6521.58	22932.1	132449	3209.36
G4	12	35680.1	5792.69	25078	140421	3069.41
G5	12	33481.2	5697.14	25261.2	137891	2876.15
G6	12	35648	6069.24	26474.3	140253	2885.68
G7	12	34288.5	5910.86	26059.3	139237	3103.72
G8	12	38584	7169.42	27316.7	144586	4642.19
G9	12	43320.2	7220.16	25992.7	142864	3416.42
G10	12	58006.2	10301.4	26215.2	141799	4121.82
G11	12	73645	12531.9	25946	143078	7421.61
G12	12	47522.9	7811.29	23642.2	156980	3742.57
H1	12	60033.3	10012.8	24274.3	158456	8944.88
H2	12	44172.3	7491.45	24342.2	156877	3897.45
H3	12	41391.3	7792.57	25236.5	147487	5295.81
H4	12	41740.3	7933.11	26227.8	146153	3424.93
H5	12	38820.1	6850.17	26777.5	149285	3338.17
H6	12	44671.3	7937.62	28079.6	153303	4770.59
H7	12	30835.9	6977.62	4254.63	5572.51	3088.5
H8	12	34512.9	5827.25	3821.28	6678.62	3818.94
H9	12	34458.4	5399.48	3775.33	6564.06	3296.95
H10	12	46452	10668.5	8168.26	10781	6776.6
H11	12	40223.9	6579.28	4309.16	6620.58	3743.57
H12	12	44289.9	5807.96	3554.72	6177.14	3586.4
A1	13	21244.5	4320.29	13768.3	96503.4	3112.37
A2	13	35773.9	6051.59	18742.4	122930	3572.03
A3	13	34012.3	5796.54	19326.6	118689	2705.69
A4	13	34520.5	6334.3	20689.9	113684	2915.06
A5	13	34461.2	5564.12	22036.1	123431	3361.27
A6	13	48142	8418.73	26257.4	138463	5462.37
A7	13	37929.5	6332.36	24781.1	135634	4304.37
A8	13	202685	33783.9	83555.9	430406	22135.9
A9	13	44845.9	7349.21	23568.4	128936	4165.39
A10	13	33192.3	7053.55	22183.2	131801	4960.05
A11	13	34124.6	5234.68	20802.2	137889	3196.5
A12	13	41347.8	6809	20063.6	140177	4522.97
B1	13	36933.8	6211.19	18237.9	122720	3655.79
B2	13	42172.5	7158.27	20467.9	124163	3655.34
B3	13	32645.3	5499.18	18984	110028	2876.77
B4	13	31130.8	5006.55	21947.5	122750	3293.4
B5	13	33732.2	5426.04	26199.5	148805	4385.26
B6	13	26879.7	4442.07	23531.1	127836	2613.85
B7	13	32812.2	5240.52	23886.4	129344	3720.12
B8	13	117592	17176.1	75770.8	421435	11047.5
B9	13	38284.1	6604.29	22771.8	125120	3243.85
B10	13	42837.4	6849.25	23758.5	134531	3643.09
B11	13	46144.8	7966.13	23933.6	143213	5192.64
B12	13	45990.9	8288.12	23436.4	151243	6034.24
C1	13	41479	7175.67	20601.6	129075	3535.99
C2	13	44215.1	6662.63	25030.2	154108	4227.41
C3	13	37780.9	5209.81	21062.7	119475	2435.58
C4	13	32957.6	5729.76	23367.7	125666	3158.33
C5	13	32614.5	5682.1	25340.2	127508	3940.98
C6	13	30521.7	5174.04	24799.6	128592	3126.05
C7	13	33430.4	5646.63	25587.9	130732	2621.98
C8	13	38041.9	6383.55	25935.3	132825	3870.28
C9	13	46754.1	8993.94	22813.2	113923	3939.81
C10	13	39021.7	7265.68	25147.3	137428	4335.98
C11	13	35035.1	6548.82	23686.6	141375	3143.18
C12	13	46262.7	7557.78	23227.1	146082	3456.74
D1	13	45153.9	7733.94	21749.8	133571	3158.49
D2	13	37046.8	5912.96	21051.9	123004	3219.37
D3	13	44076.6	7600.89	23763.6	124689	4566.23
D4	13	33372.7	6118.03	24378.7	124448	4628.28
D5	13	35510.3	5720.04	25270.7	127779	3031.73
D6	13	39368.6	7100.62	26624.8	129379	5361.56
D7	13	31026.9	5403.51	25084.6	126013	2883.56
D8	13	31153.8	6614.24	25390.1	125916	3201.7
D9	13	36315.7	6198.89	23656.1	125032	4374.07
D10	13	51992.5	9363.75	25309.1	130478	5100.21
D11	13	46382.6	7997.95	25470.9	141996	3534.28
D12	13	137086	18153.3	29022.4	149320	7479.6
E1	13	46249.7	7292.52	20605.7	127605	4440.87
E2	13	41254.4	7091.02	20647.6	115486	3420.78
E3	13	64626.7	8646.8	23873.3	123773	6036.35
E4	13	33997.8	5990.74	24970.8	129418	3131.7
E5	13	28232.5	4710.55	24337	124326	2690.36
E6	13	141276	22908.2	35423.2	139562	12006.4
E7	13	48387.7	8575.08	26670.2	125251	7843.34
E8	13	35767.3	6698.12	25490.1	125580	5059.54
E9	13	36535.3	7834.49	27115.4	127078	3410.2
E10	13	38494.1	6608.99	24011.9	126898	4638.31
E11	13	38250.1	7065.34	22829.5	128867	6259.73
E12	13	52974.4	8927.69	23202.5	136721	5455.01
F1	13	48960.3	9323.78	23741	141114	9213.06
F2	13	44792.5	7740.91	21643.5	125764	3200.68
F3	13	34394.7	5882.34	22356	126399	3184.07
F4	13	34668.7	5852.95	24888	131742	3360.32
F5	13	29882.1	4801.85	25794.8	134853	2545.46
F6	13	55254	10429.6	28964.8	133493	7163.94
F7	13	32605.1	5574.54	26358.3	133204	4255.81
F8	13	33468	5653.41	25890.6	133659	2855.11
F9	13	35220.5	5893.96	24145	127575	4412.2
F10	13	35509.4	6116.95	24472.4	135812	5024.03
F11	13	31139.4	4943.93	22060.7	131303	3353
F12	13	59972	11811.5	26124	154457	6184.62
G1	13	44289.9	7333.16	22089.7	146249	3778.79
G2	13	51510.7	8653.88	23114.2	138423	3823.36
G3	13	40590.8	6730.61	23097.4	132830	3228.84
G4	13	35914.2	5828.2	25111.7	140681	2514.01
G5	13	33564.6	5456.34	25296.2	138116	2978.7
G6	13	35455.5	6270.18	26517.5	140533	2984.7
G7	13	34289.9	5931.97	26093	139434	3003.33
G8	13	38623.2	7265.23	27156.1	144772	4581.99
G9	13	43960	7133.6	26141.4	143271	3765.95
G10	13	58255.5	10385.6	26104.2	141669	4372.74
G11	13	73485.1	12589.3	26090.9	142870	7539.29
G12	13	47528.2	7688.75	23803.9	156934	3743.71
H1	13	60667.6	10240.6	24373.5	158653	9003.78
H2	13	44754.9	7666.06	24410.1	157022	4028.86
H3	13	41873.3	7856.79	25229.4	147451	5507.19
H4	13	42074.2	7914.15	26222.2	146315	3331.55
H5	13	39312.3	7019.05	26713.1	149375	3374.95
H6	13	44722.2	7699.83	28155.3	153507	4664.29
H7	13	30763.3	7039.76	4242.18	5515.09	2924.99
H8	13	34644.1	5895.77	3907.38	6516.61	3693.17
H9	13	34683.7	5357.42	3679.61	6559.69	3534.95
H10	13	46717.2	10930.4	7968.93	10758.9	6331.4
H11	13	40301.1	6718.38	4471.15	6287.24	3662.36
H12	13	44354.4	5924.92	3626.68	6082.24	3400.02
A1	14	21772.5	4551.37	13760.4	97752.2	2986.95
A2	14	35676	5658.08	18494.2	123181	3238.49
A3	14	33575.7	5961.39	19258.2	117871	2745.7
A4	14	34789.3	6368.87	20451.4	114228	3243.42
A5	14	34872.8	5466.33	21968.8	123563	3106.87
A6	14	48018.7	8432.28	26356.3	138397	5681.03
A7	14	38435	6550.88	24770.3	135615	4233.51
A8	14	201999	33778.2	83861.9	428281	23245.5
A9	14	45215.6	7341.07	23695.6	128870	4594.59
A10	14	33105.8	6926.31	22195.5	131452	4704.75
A11	14	34194.7	5355.61	20995.4	137617	3669.24
A12	14	42082.9	6984.58	19925.9	140233	4032.42
B1	14	37063.2	6362.73	18390.8	122600	3858.79
B2	14	41505	7253.44	20513.2	124241	3673.58
B3	14	32668.6	5601.39	18946.1	109691	3156.42
B4	14	31631.8	5230.88	21812.1	122084	3602.9
B5	14	34047	5372.17	26178.3	148536	4474.55
B6	14	27030.3	4432.13	23579.9	127856	2884.94
B7	14	32274.4	5269.36	23952.5	128949	3654.43
B8	14	117366	17788.4	76057.9	421879	11209.4
B9	14	37763	6737.58	22731.6	125050	3586.47
B10	14	42729.3	6807.77	23815.2	134276	3673.69
B11	14	46235.7	7552.88	23948.5	143334	5587.54
B12	14	45839.9	8299.64	23334.2	150984	5800.91
C1	14	41321.2	7010.02	20388.5	129334	3541.6
C2	14	43709	7249.75	25111.4	153567	4679.92
C3	14	38284.9	5154.3	20871.2	119091	2477.21
C4	14	32713.3	5584.28	23505	125462	3352.69
C5	14	32006.2	5701.86	25363	127175	4189.74
C6	14	30581.8	5154.93	25049.4	128165	2839.19
C7	14	33881.7	5712.53	25624.6	130702	2476.86
C8	14	37937	6335.08	25695.8	132986	4044.65
C9	14	46960.4	8945.24	22822.3	113994	3761.58
C10	14	39068.1	7176.62	25279.2	137509	4019.74
C11	14	35426.7	6428.58	23505.7	141378	3160.85
C12	14	46822.4	7427.13	23149.9	146952	3741.25
D1	14	45002.7	7546.38	21676.9	133592	3161.38
D2	14	37322.8	6335.73	20993.7	122623	3056.32
D3	14	44262.6	7938.05	23793.2	124773	4722.12
D4	14	33131.2	5992.23	24367.1	124502	4930.7
D5	14	35308.9	5860.82	25278.7	127758	3177.52
D6	14	39301.4	7170.6	26804.9	129147	4895.74
D7	14	30613.3	5095.25	25111.1	125806	2930.02
D8	14	30971.9	6391.38	25316.5	125937	3450.64
D9	14	36258.7	6365.09	23776.7	124884	4224.86
D10	14	51854.3	9426.58	25424.1	130058	5008.29
D11	14	46350.8	8133.77	25344.1	141800	3947.13
D12	14	137640	18447.7	29040.4	149258	7325.58
E1	14	46482.7	7236.24	20684.2	127391	3922.74
E2	14	40810	7119.19	20258.7	115095	3487.52
E3	14	64260.2	8926.57	23870.5	124079	5850.04
E4	14	34021.4	6050.33	24944.2	129365	3654.75
E5	14	28165.2	4459.32	24277.1	124074	2776.41
E6	14	141363	23044.7	35442.3	139464	12251.2
E7	14	48377.9	8767.06	26513.9	125062	7756.25
E8	14	35800.6	6903.89	25444.8	125612	4815.77
E9	14	36692.5	8008.03	27250.5	127218	3193.26
E10	14	38478.4	6693.39	23963.1	126506	4558.44
E11	14	37981.1	6616.29	23008.4	128772	5878.35
E12	14	52969.2	8995.4	23158.6	136687	5546.2
F1	14	49427.8	9213.72	23641.5	141091	9399.33
F2	14	44969.1	7547.97	21562.7	125404	3402
F3	14	34400	5790.19	22331.2	126619	2911.97
F4	14	34956.5	5777.55	25157.3	131732	3469.03
F5	14	29568.2	4947.61	25855.5	134815	2878.7
F6	14	55277.5	10475.7	29033.3	133020	7132.85
F7	14	32696.5	5581.56	26334.1	133102	4456.98
F8	14	33385.7	5512.61	25916.4	133778	2887.27
F9	14	35289.8	6110.41	23933.1	127408	4659.78
F10	14	35840.5	6139.89	24313	135682	4880.76
F11	14	30687.4	5035.48	21939	131462	3017.7
F12	14	59904.2	11591.9	26191.2	154256	6134.15
G1	14	44206.5	6813.19	22174.1	146798	4338.13
G2	14	51622.8	8561.61	23297.7	138394	3716.15
G3	14	40371.5	6726.97	23192.9	132707	3188.1
G4	14	35953.4	5992.8	25175.9	140540	2790.89
G5	14	33656.1	5476.47	25361.6	138030	3071.78
G6	14	35683.3	6173.67	26535.1	140508	3307.07
G7	14	34355.7	5877.68	26118.3	139139	3220.59
G8	14	38808.2	7176.79	27270.1	144925	4634.56
G9	14	43829.5	6978.49	26013.3	143104	3779.09
G10	14	58414.4	10578.1	26166	141428	4409.37
G11	14	74152.5	12884.4	26084.3	143032	7909.77
G12	14	48348.1	7738.49	23669.5	156564	3304.55
H1	14	61184.2	10587.6	24151.4	158182	8822.43
H2	14	44733.5	7878.9	24239.3	157344	4273.24
H3	14	41962.8	7842.64	25164.7	147660	5331.04
H4	14	42242	8192.88	26345.9	145863	3297.45
H5	14	39951.8	7172.1	26741.2	149491	3472.53
H6	14	44749.2	7887.31	28096.8	153010	4720.88
H7	14	30796.2	7166.38	4327.76	5406.46	2920.22
H8	14	34765.2	5806.27	3890.02	6407.42	3686.74
H9	14	34411.6	5337.26	3684.79	6508.94	3606.7
H10	14	46366.6	10714.8	8019.74	11003.3	6650.11
H11	14	40175.7	6586.17	4193.14	6885.22	3698.45
H12	14	44870	6225.46	3649.77	6014.25	3703.6
A1	15	21573.3	4236.56	13697.5	96764.4	2982.63
A2	15	35472.7	5693.71	18805.2	122803	3534.66
A3	15	33295.5	6021.07	19146.1	118169	2773.21
A4	15	34492.4	6514.06	20736.7	114149	3266.65
A5	15	34478.1	5693.83	21828.9	123644	3542.99
A6	15	48149.7	8428.11	26214.4	138549	5451.9
A7	15	38546.4	6707.79	24701.8	135630	4003.93
A8	15	202783	33937.6	83628.8	430206	20946.7
A9	15	45077.4	7379.72	23670.2	129221	3992.33
A10	15	33517.6	6838.84	21977.2	131985	4563.29
A11	15	33974.3	5280.18	20796.4	137772	3301.04
A12	15	41743.6	6983.09	20236.1	140474	4242.86
B1	15	37818	5752.57	18485.4	122467	3645.64
B2	15	42044.6	7156.79	20610.8	124441	3553.69
B3	15	32935.5	5202.75	19101.4	109550	2606.55
B4	15	31283	5230.88	21832.8	122274	3475.65
B5	15	33951.3	5440.05	26116	148405	3865.16
B6	15	27083.8	4239.7	23518	127554	2853.21
B7	15	32460	5314.82	23879.2	129153	3735.21
B8	15	117092	17772.2	75911.5	420445	12165.4
B9	15	37817.6	6395.22	22786.8	125186	3649.1
B10	15	42633.1	6992.46	23863.8	134391	3718.12
B11	15	46317.6	7699.97	23949.6	143438	5476.69
B12	15	46765	8047.66	23505.5	151143	5730.63
C1	15	41033.2	7283.65	20529.1	129342	3657.11
C2	15	44156.8	7200.4	25265.4	153903	4108.33
C3	15	38049.7	5405.25	20983.8	119329	2550.33
C4	15	32842.3	5702.82	23450.8	125171	3510.33
C5	15	32063.1	5510.15	25333	126886	3568.85
C6	15	30504.9	5203.94	24902.6	128438	3107.91
C7	15	33539.2	5674.42	25731.5	130622	2425.74
C8	15	37998.4	6326.42	25961.6	132720	3649.17
C9	15	46910.3	8917.41	22865.7	113767	3712.08
C10	15	39156.1	7315.6	25191.2	137559	4160.95
C11	15	35560.6	6623.15	23695.3	140783	3197.3
C12	15	46480.9	7946.18	23169.4	146847	3680.79
D1	15	45660.5	7384.12	21689.8	133576	3478.77
D2	15	37437.6	6060.41	21085.5	122789	2829.81
D3	15	44436.4	7954.91	23803.8	124748	4832.72
D4	15	33327.5	6174.28	24290.8	124236	4950.79
D5	15	35447.8	5667.13	25191.1	127961	2951.84
D6	15	39077.3	7093.71	26609.3	129051	5231.46
D7	15	30806.1	5190.23	25175	125652	2599.3
D8	15	31176.2	6441.79	25352	125917	2954.63
D9	15	36346.5	6187.4	23578.2	125013	4086.16
D10	15	52266	9233.4	25518.9	130214	4707.36
D11	15	46735	8054.98	25454.4	141964	3775.11
D12	15	138056	18472.1	28866.3	149484	7359.36
E1	15	46223.3	7356.85	20709.3	127470	4082.16
E2	15	41161.3	7295.76	20476.9	115326	3526.11
E3	15	64812.2	8698.85	23941.4	123843	6330.88
E4	15	33879.5	5640.27	24798.5	129160	3465.06
E5	15	28562.4	4745.94	24133.2	124191	2966.49
E6	15	141470	22906.5	35427.7	139438	12094.4
E7	15	48455.8	8424.17	26542.2	124708	7991.97
E8	15	35746.6	6699.03	25423.2	125149	4974.12
E9	15	36628.4	7800.14	27037.4	127081	3596.28
E10	15	38162.2	6645.41	23896.3	126345	4465.71
E11	15	38107.3	6703.02	22949.1	128875	6223.41
E12	15	53273.5	9134.16	23293.7	136857	5811.49
F1	15	49101.3	9692.56	23729.2	141345	9449.09
F2	15	45033.9	7471.42	21525.3	125641	3528.72
F3	15	34279	5919.02	22307.3	126268	2946.21
F4	15	34927.2	5938.41	24989.4	131416	3245.53
F5	15	29945.5	4806.71	25716.6	134597	2798.99
F6	15	55401.5	10555.1	29024	133087	7442.15
F7	15	32864.7	5642.35	26293.8	132863	3935.1
F8	15	33357.1	5595.53	25847	133484	2907.89
F9	15	35160.2	5873.04	23967.9	127538	4584.91
F10	15	35751.7	6135.64	24331	135492	4760.2
F11	15	31124.9	4803.07	22027.1	131392	2683.4
F12	15	60419.9	11721.4	26187.9	154444	5962.86
G1	15	44108.6	7159.84	22179.3	146771	3801.99
G2	15	51536.9	8394.83	23337.4	138506	3675.67
G3	15	40942.3	6846.03	23041.7	132857	3248.32
G4	15	36254.7	5895.17	25143.8	140660	2952.61
G5	15	33904.1	5701.78	25370.2	137983	2876.15
G6	15	35989.6	6188.08	26503.6	140379	3058.41
G7	15	34780.3	5953.84	26124.5	139320	3101.37
G8	15	39361.8	7389.7	27349.2	144845	4684.59
G9	15	43949	7059.9	26060.6	143187	3683.61
G10	15	59148.4	10433	26182.1	141584	4334.28
G11	15	74765.4	13108.5	26176.9	143064	7529.48
G12	15	48742.6	8000.57	23757.2	156817	3753.98
H1	15	62223.3	10438.1	23982.8	158099	8574.43
H2	15	46343.1	8042.03	24424.1	157425	4023.1
H3	15	43463.6	8070.14	25292	147176	5222.25
H4	15	43737.3	8338.02	26186.3	146068	3269.03
H5	15	41153.5	7192.45	26640.5	149644	3558.11
H6	15	44774.7	7805.77	28091.6	153305	4774.42
H7	15	30859.9	7114.47	4421.11	5588.8	2912.29
H8	15	34483.9	5799.28	3885.86	6687.78	3680.3
H9	15	34547.7	5561.58	3714.97	6338.32	3502.57
H10	15	46780.2	10635.2	7914.22	11118.4	6347.34
H11	15	40266.2	6681.59	4169.06	6557.51	3460.46
H12	15	44982.4	5975.26	3748.89	6035.49	3329.43
A1	16	21231.3	4393.97	13828	97109.2	2472.31
A2	16	35738.1	5703.42	18463.6	122763	3728.42
A3	16	33451.9	5898.86	19397.8	118409	2709.44
A4	16	35115.7	6380.4	20524.4	113757	3370.11
A5	16	34588.6	5619.71	21856.9	123429	3612.73
A6	16	47880	8636.54	26176.8	138860	5742.76
A7	16	38323.6	6475.79	24571.5	135377	4155.09
A8	16	202327	33692.8	83669.6	428868	21547.4
A9	16	44918.5	7452.93	23717	128944	4128.8
A10	16	33449.4	7172.83	22104.9	131640	4879.37
A11	16	34091.7	5271.8	20905.2	137742	3662.27
A12	16	41869.5	7246.46	20123.4	140116	4139.06
B1	16	37919	6382.67	18228.8	122506	3780.97
B2	16	41614.9	7063.11	20517.4	123778	4004.58
B3	16	32834.2	5368.85	18970.1	109689	2803.61
B4	16	31233.8	4919.31	21835.1	122616	3456.24
B5	16	34203.3	5185.77	26151.3	148552	4345.43
B6	16	27252	4419.48	23621.1	127783	2655.56
B7	16	32542.4	5039.46	24037.7	129107	3475.13
B8	16	116871	17561.8	75520.3	420719	11817.2
B9	16	37953.6	6496.56	22619.4	125032	3388.45
B10	16	42762.5	7074.43	23947.2	134501	3517.7
B11	16	46468.5	7792.19	24086.4	143434	5224.97
B12	16	46865.6	8396.12	23606.3	150923	6351.91
C1	16	41502.8	7270.15	20586.7	129433	3423.85
C2	16	44712.6	6938.32	25175.7	154174	4535.32
C3	16	38055.5	5273.41	20923.4	119368	2774.2
C4	16	32682.6	5373.06	23592.6	125336	3403.44
C5	16	32137.3	5788.82	25231.8	127346	3820.62
C6	16	30643.6	5336.01	24884.3	128256	3100.13
C7	16	33861.7	5602.96	25643.8	130497	2571.68
C8	16	38113.6	6227.73	25834.6	132825	3944.88
C9	16	46685.3	8913.06	22864.8	113684	3828.19
C10	16	39101.7	7130.63	25236.2	137589	4115.21
C11	16	35441.4	6502.91	23661.5	141146	3391.67
C12	16	46177.9	7683.68	23320.4	146357	3951.07
D1	16	45784.1	7848.79	21751.8	134096	3221.01
D2	16	37626.7	6362.22	21282.7	123012	2698.49
D3	16	44549.2	7879.04	23879.9	124998	4919.1
D4	16	33545	5926.78	24213.4	124467	4719.22
D5	16	35483	5868.38	25170.2	128182	2861.96
D6	16	39323.8	7089.39	26730.9	129110	4993.09
D7	16	31113.6	5185.92	25069.1	126040	3132.28
D8	16	31467.8	6302.94	25379.9	126009	3127.11
D9	16	36042.9	6222.76	23714.6	124893	3988.6
D10	16	52632.2	9518.49	25289	130021	5035.38
D11	16	46816.5	8104.74	25588.3	141878	3771.98
D12	16	138840	18519.9	29111.3	149317	7255.03
E1	16	46135.6	7479.75	20647.1	127503	4124.12
E2	16	41530.5	7089.94	20620.2	114900	3604.33
E3	16	64644.5	8872.66	23920.8	123846	6028.83
E4	16	33904.8	5775.48	24843.4	129352	3389.94
E5	16	28239	4768.94	24165.5	124089	2931.5
E6	16	141716	22812.4	35290.4	139597	12074.3
E7	16	48490.7	8526.86	26571.3	125079	7645.48
E8	16	35793.1	6697.22	25363.8	125379	4752.43
E9	16	36738.2	8022.12	27092.7	127232	3354.1
E10	16	38257.4	6749.36	23906.2	126441	4400.52
E11	16	38011.4	6643.27	22960.6	128772	5957.69
E12	16	53510.5	8883.39	23294.5	136782	5522.99
F1	16	49279.4	9641.1	23594.4	141370	9507.78
F2	16	45597.1	7664.36	21475.8	125565	3415.29
F3	16	34745.4	5874.29	22236.5	126474	2803.86
F4	16	35076.2	5810.23	25012.4	131725	3236.83
F5	16	30132	4898.21	25902.1	134500	2698.94
F6	16	55776.2	10230.9	28995.2	133272	7318.59
F7	16	32810.8	5387.48	26314.8	133046	3888.11
F8	16	33281.4	5644.81	25825.2	133709	2971.39
F9	16	35356.1	5927.75	24015.9	127343	4237.79
F10	16	35672	6507.06	24259.1	135536	4568.89
F11	16	31080.4	5059.63	22031	131382	3577.87
F12	16	60677.4	11836.4	26040.5	154399	6209.45
G1	16	45010.7	7206.34	22039.2	146616	4120.33
G2	16	52726.9	8735.5	23276.7	138357	3531.27
G3	16	41607.4	7014.16	23085.9	132670	3355.48
G4	16	36813.7	5917.76	25110.9	141037	2933.82
G5	16	34454.6	5478.02	25296.2	138215	3080.46
G6	16	36760.7	6480.49	26446.4	140124	2874.51
G7	16	35453.4	6036.03	26118.3	139361	3022.15
G8	16	39832.4	7374.14	27164.5	144696	4757.51
G9	16	44884.7	7521.82	26070	143005	3787.85
G10	16	60237.9	10508.2	26160.6	141774	4364.5
G11	16	76177.6	12967.7	26084.3	142680	7683.12
G12	16	50217.8	8240.8	23725.3	156695	3677.55
H1	16	64137.6	10954.2	24272.7	158375	9047.17
H2	16	48542	8323.69	24447.5	157224	3911.28
H3	16	45739.6	8330.29	25245.8	147536	4970.46
H4	16	45824.4	8574.69	26190.3	146216	3585.7
H5	16	43756	7665.92	26722.7	148900	3380.2
H6	16	44834.6	7830.15	28010.5	153410	4604.64
H7	16	30987.2	6907.63	4349.54	5796.74	2982.93
H8	16	34600.9	5767.12	3962.24	6618.75	3742.48
H9	16	34786.8	5293.45	3773.61	6518.56	3110.58
H10	16	46812.7	10711.8	7952.32	10889.1	6359.29
H11	16	40326.5	6597.67	4076.03	6529.36	3524.75
H12	16	44691.5	5991.54	3571.01	5855.6	2703.92
A1	17	21500	4159.53	13672.4	97047	3090.75
A2	17	36274.7	5816.78	18734.8	122784	3605.24
A3	17	33626.2	5873.28	19314.3	118331	3169.56
A4	17	34926.3	6357.35	20780	114241	3310.99
A5	17	34765.7	5347.94	21960.5	123457	3812.12
A6	17	47884.4	8456.25	26267.1	138633	5571.17
A7	17	38036.6	6419.96	24776.2	135142	4544.34
A8	17	203369	33815.2	83421.8	429696	21158.2
A9	17	44953	7230.23	23700.7	128723	4539.21
A10	17	33640.8	6860.42	22045.5	131288	4773.27
A11	17	34014.4	5284.97	20772.1	137887	3533.34
A12	17	41840.3	7073.86	19963.5	140315	4072.24
B1	17	37381.4	6418.56	18137.8	123372	3867.25
B2	17	42064.3	7510.69	20439.6	123917	3786.95
B3	17	32656.3	5440.4	19057.2	109984	2595.93
B4	17	31526.4	5143.64	22079.4	122888	3225.46
B5	17	33956.8	5305.36	26172.5	148676	4113.74
B6	17	27323.1	4494.46	23492.7	127836	2765.26
B7	17	32443.7	5407.48	24065.8	129209	3396.13
B8	17	117319	17621.1	75891.8	421054	11349.9
B9	17	38123.2	6440.87	22842	125028	3462.13
B10	17	42948.6	6929.25	23736.7	134193	3381.46
B11	17	46428.9	7788.69	24115.1	143235	5250.38
B12	17	47057.1	8319.8	23588.4	150776	5926.01
C1	17	42024.9	7075.06	20594.7	129474	3584.22
C2	17	44638.9	7334.84	25084.3	153509	4892.56
C3	17	38987.1	5628.44	20931.5	118932	2598.7
C4	17	32885.7	5554.11	23582.6	125434	3151.85
C5	17	32039	5721.63	25346.4	126911	4032.26
C6	17	30848.8	5386.68	24904.4	128088	3060.38
C7	17	33235.2	5622.81	25392.5	130650	2138.81
C8	17	38032.6	6198.3	25890.9	132661	3845.11
C9	17	46805.9	8907.84	22878.3	113892	3790.39
C10	17	39182.8	7021.99	25168.3	137533	4318.08
C11	17	35295	6506.19	23680	141136	3031.63
C12	17	46713.3	7643.3	23171.7	146147	3838.45
D1	17	45848.1	7522.15	21706.8	133665	3108.48
D2	17	38147.3	6134.13	20947.7	122574	3066.17
D3	17	44834.8	7723.11	23971.9	124787	5079.21
D4	17	33366	6411.56	24494.2	124480	4359.7
D5	17	35575.3	5857.04	25221.9	127621	2963.82
D6	17	39421.5	6753.33	26471.3	129196	5004
D7	17	30989.9	5124.61	25066.4	125814	2984.69
D8	17	31182	6614.24	25370.6	125490	3232.47
D9	17	36391.4	6336.8	23775.8	124691	4133.99
D10	17	53323	9556	25384.8	130041	5285.99
D11	17	47687.4	8502.88	25459.5	141691	3549.92
D12	17	140332	18815.3	29152	149552	7511.4
E1	17	46434.6	7247.73	20689.6	127367	4436.68
E2	17	41269.2	7185.26	20495.8	115067	3568.87
E3	17	64729.3	8897.76	23975.9	123816	5971.43
E4	17	34224.5	5804.83	24946.1	129117	3540.18
E5	17	28661.3	4736.21	24264.1	124007	2878.54
E6	17	141257	23001.5	35351.3	139196	12313.5
E7	17	48309	8584	26497.9	124677	7593.42
E8	17	35586	7128.6	25440.1	125057	5012.51
E9	17	36404.8	7975.43	27180.7	126765	3418.62
E10	17	38384.1	6842.64	23928.8	126452	4533.65
E11	17	38189.5	6775.29	22875.4	129046	5926.15
E12	17	53632.9	9283.79	23410.8	136951	6028.7
F1	17	50487.4	9536.76	23650.7	141530	9558.82
F2	17	45990	7690.58	21466.8	125294	3546.1
F3	17	35256.9	6056.8	22442.9	126554	2982.25
F4	17	35252.2	6117.7	25077.2	131679	3396.85
F5	17	30238.4	4862.58	25868.8	135080	2656.54
F6	17	55674.4	10427.4	29050.5	133450	7267.57
F7	17	32815.8	5707.05	26413.9	133087	4254.99
F8	17	33222.6	5588.49	25867.9	133786	2918.61
F9	17	35147.4	5870.62	24109.4	127513	4383.27
F10	17	35520.3	6182.39	24377.3	135646	4644.89
F11	17	31283.1	5146.15	22097.3	131058	3041.58
F12	17	60422.7	11774.6	26165	154254	6141.59
G1	17	46031.2	7565.67	22197.4	147014	3979.85
G2	17	53899	8715.39	23134.1	138578	3748.97
G3	17	42902.7	6992.35	23230.9	132855	3387.36
G4	17	37928.5	6195.33	25193.5	140649	2732.9
G5	17	35838.9	5742.82	25394.3	137866	3328.16
G6	17	37790.1	6337.88	26384.1	140140	2968.32
G7	17	36661.6	6035.27	26122.2	139148	3003.33
G8	17	41120.8	7343.84	27227.7	144724	4788.03
G9	17	46209.3	7468.69	25874.8	143089	3846.54
G10	17	62715.4	10819	26196.4	141687	3850.76
G11	17	78736.9	13438.5	26033.2	142786	7573.07
G12	17	53640.3	8687.3	23778.9	156428	3791.62
H1	17	69373.5	11440.1	24542.2	157769	8989.83
H2	17	52682.2	8632.12	24284.9	157228	4236.36
H3	17	50398.4	8903.93	25112.3	147367	4980.82
H4	17	49951.4	9062.06	26357.1	146407	3442.8
H5	17	48605	8081.33	26622.8	149296	3456.02
H6	17	45020.5	7760.8	28137.3	153308	4851.66
H7	17	30872.6	7009.08	4279.52	5810.71	3130.57
H8	17	34675.3	5844.73	3935.85	6576.48	3849.67
H9	17	34549.4	5399.48	3705.48	6368.07	3447.45
H10	17	46751.7	10573.8	7992.38	10724.9	6221.84
H11	17	40637.7	6540.19	4277.42	6263.59	3798.83
H12	17	44432.1	5876.06	3511.27	6018.5	3199.52
A1	18	21725.5	4871.21	13752.6	96641.7	2930.73
A2	18	36263.4	5983.57	18613.7	122886	3086.25
A3	18	33782.6	5529.38	19355.4	118247	2898.24
A4	18	35297.5	6549.79	20483.3	113724	2882.33
A5	18	34731.8	5627.95	21930.5	123286	3294.48
A6	18	48536	8460.42	26461.6	138352	5526.19
A7	18	38270	6479.64	24902.5	135721	4769.19
A8	18	202917	33371.3	83497.6	430254	22004.1
A9	18	45181	7417.34	23703.8	128629	4506.57
A10	18	33756.2	6866.1	22174.3	131309	4824.11
A11	18	33960	5589.09	20819.6	137643	3797.01
A12	18	42044.6	7157.18	20133.2	139972	4375.09
B1	18	38281	6917.05	18352.6	122600	3430.79
B2	18	42672.7	7274.26	20462.2	124514	3839.08
B3	18	33318.8	5325.41	18876.7	109998	2995.94
B4	18	31252.6	5312.45	22056.4	122573	3486.43
B5	18	34419.1	5363.55	26051.2	148803	4199.42
B6	18	27366.5	4495.37	23692.4	127979	3010.96
B7	18	32836.7	5153.98	23996	129287	3456.49
B8	18	117227	17653.5	75646.9	420569	11142.2
B9	18	38121.2	6677.32	22626.8	124763	3332.27
B10	18	42761.4	6746.53	23614.5	134330	3943.22
B11	18	46304.8	7646.27	23995.6	143471	5177.63
B12	18	46997.1	8542.99	23339.7	151282	6098.9
C1	18	42507	7007.57	20660.4	129377	3680.66
C2	18	45843.2	7113.61	25086	154145	4521.71
C3	18	39613.9	5677.01	21034.8	119067	2937.32
C4	18	33019	5587.51	23533.8	125814	3382.92
C5	18	32430.4	5985.47	25217.4	127114	3826.64
C6	18	30932.2	5253.78	24824.9	128041	2935.1
C7	18	33718.2	5533.89	25499.3	130566	2430.69
C8	18	38236.4	6438.09	25844.6	132824	3481.99
C9	18	46665.8	8861.75	22868.4	113641	3945.21
C10	18	39174.9	7211.86	25243.2	137590	3838.74
C11	18	35841	6663.6	23696.4	141076	3316.57
C12	18	46831.4	7863.04	23199.4	146422	3907.21
D1	18	47163.6	7967.85	21569.9	133770	3271.98
D2	18	39486.8	6454.38	21194.2	123009	3043.19
D3	18	46079.7	8152.99	23845	124778	4763.2
D4	18	33402.6	6094.51	24315.1	124513	5073.45
D5	18	35729.2	5750.28	25235.9	127983	3065.68
D6	18	39701.6	6995.23	26496.9	128943	4951.23
D7	18	31143.3	5204.05	25194.2	126028	2768.76
D8	18	31311.6	6327.7	25378	125830	3572.78
D9	18	35915.9	6456.14	23832.4	125110	4215.29
D10	18	54687.8	9591.63	25342.7	130379	5142.78
D11	18	49633.7	8691.58	25582.2	141885	3553.04
D12	18	142232	19074.7	29119.8	149517	7228.2
E1	18	47152.9	7471.71	20607.8	127774	4440.87
E2	18	41912.4	7281.67	20430.5	115123	3516.73
E3	18	65277.7	8934.01	23849	124178	5841.57
E4	18	34227	5964.05	24940.6	128927	3096.96
E5	18	28736.7	4597.32	24024.5	124029	3121.57
E6	18	141467	22990.2	35414.1	139438	12245.7
E7	18	48461.5	8440.24	26575.1	124892	7682.41
E8	18	35777.3	6832.59	25452.4	124942	4709.25
E9	18	36387.4	8186.84	27106.3	127058	3332.59
E10	18	38074.9	6794.67	23863.8	126454	4371.14
E11	18	38143.5	6888.03	22799.8	128753	6108.71
E12	18	54032.8	9028	23222.9	136851	5499.78
F1	18	51831.9	9748.3	23777.6	141360	8966.81
F2	18	47322.2	7866.75	21517.3	125602	3380.54
F3	18	36371.4	6241.99	22420.7	126541	2904.77
F4	18	35549.5	5899.87	25155.6	131737	3397.72
F5	18	30579.5	5154.91	25788.1	134775	2794.75
F6	18	56166.2	10592.8	29220.3	133357	7203
F7	18	32868.3	5793.56	26409.1	133203	4105.76
F8	18	33625.9	5598.66	25904.3	133550	2765.22
F9	18	35450.2	5941.43	24028.3	127603	4720.19
F10	18	36035.9	6190.04	24306.2	135563	4642.27
F11	18	31222.1	4841.31	22072.6	131473	2924.18
F12	18	60748.8	11770.3	26060.2	154006	5955.41
G1	18	48256.4	7884.14	21913.3	146613	3643.47
G2	18	56312.3	9199.18	23228.1	138272	3678.95
G3	18	45186.7	7431.3	23207	132524	3332.45
G4	18	40455.4	6574.57	25038.7	140867	2982.83
G5	18	37611.4	6045.56	25268.2	137759	3004.73
G6	18	40316.6	6658.38	26486.7	140396	3298.14
G7	18	38972.4	6284.86	26067.8	138960	2987.64
G8	18	43672.9	7751.65	27235.2	144437	4560.79
G9	18	48753.5	7799.48	26070	143105	3659.08
G10	18	67285.1	11539	26263.6	141985	4637.39
G11	18	83344.5	13856.3	26129	142948	7637.36
G12	18	59193.3	9604.56	23915.5	156793	3732.3
H1	18	77636	12956.4	24053.7	157710	9040.98
H2	18	61818.9	9967.79	24408.9	156865	3693.41
H3	18	59478.9	10028.4	25154.4	147371	5397.36
H4	18	57304.1	10111.8	26382.7	146062	3442.8
H5	18	57620.4	9137.58	26781.2	149183	3415.48
H6	18	44950.8	7778.33	28087.1	153109	4659.7
H7	18	30826.2	7086.94	4340.98	5577.94	2805.13
H8	18	34907.2	5794.39	3920.58	6626.5	3634.57
H9	18	34651.6	5587.87	3684.79	6665.56	3417.7
H10	18	46483.5	10846.8	7780.36	10989.3	6454.9
H11	18	40802.9	6727.58	4234.74	6431.39	3656.72
H12	18	45144.3	5748.74	3447.45	5956.17	3027.26
A1	19	21603.4	4581.51	13475.9	96727.1	2894.69
A2	19	36523.2	5836.21	18797.6	122636	2846.83
A3	19	34636.2	5671.49	19448.4	118419	2829.47
A4	19	35974.6	6311.26	20443.4	113514	2807.37
A5	19	35411.8	5630.01	21913.9	123586	3125.53
A6	19	48789.2	8440.62	26350.9	138791	5732.29
A7	19	38507.8	6404.56	24612.7	135602	4492.38
A8	19	202994	33559.1	83564.6	430623	21716
A9	19	45539.1	7419.38	23716	128730	4214.84
A10	19	33981.8	7213.73	22091.4	131639	4735.7
A11	19	34446.6	5472.95	20916.8	137648	3747.06
A12	19	42564.4	7145.28	20188.8	140068	4224.38
B1	19	38594.7	6342.79	17961.2	122688	3931.53
B2	19	43464.9	7296.56	20598.1	124359	3939.42
B3	19	33749.9	5784.1	18876.7	109979	2876.77
B4	19	31342.7	5134.57	22015.1	122561	3408.79
B5	19	34097.7	5597.35	26118.3	148970	4005.14
B6	19	27667.7	4317.4	23501.1	128071	2566.71
B7	19	32862.9	5069.18	23947.1	129161	3469.8
B8	19	117165	17502.5	75590.6	420687	10622.9
B9	19	38227.6	6466.43	22672.7	125030	3342.4
B10	19	43044.8	7098.13	23908.5	134262	3529.55
B11	19	46700.1	7901.93	24089.8	143665	5260.77
B12	19	46709.8	8557.39	23461.3	151111	6051.11
C1	19	43714	7551.14	20655.8	129423	3722.16
C2	19	47092.1	7254.86	25086	154029	4145.75
C3	19	40506.1	5767.22	20932.7	119490	2796.7
C4	19	33261.2	5528.24	23478.5	125622	3233.91
C5	19	32641.5	5773.01	25345.4	127196	3820.62
C6	19	31299.5	5276.21	25052	128059	2931.64
C7	19	33569.3	5617.25	25560.3	130522	2292.17
C8	19	37780.1	6336.81	25911.7	132708	3481.99
C9	19	46746.4	8809.57	23050.2	113844	3780.49
C10	19	39357.8	7300.92	25135.3	137701	4176.87
C11	19	35557.2	6570.68	23667	141139	3133.24
C12	19	46867.3	8003.19	23071.5	146366	3772.07
D1	19	49533.1	8287.12	21730.8	133946	3301.8
D2	19	41584.6	6695.13	21053	122751	2848.41
D3	19	48195.6	8170.9	23928.6	124992	5490.01
D4	19	34249.3	6179.4	24425.3	124315	5021.64
D5	19	36010.5	5775.79	25233.9	127964	3151.56
D6	19	39933	7011.64	26484.1	129096	5172.32
D7	19	31038.9	5244.63	25043.5	125757	3021.13
D8	19	31486.1	6400.22	25406.9	125797	3046.93
D9	19	36171.8	6216.57	23748	124492	4245.9
D10	19	57767	10149.6	25302.4	130340	4783.8
D11	19	52491.1	8957	25432.7	141542	4057.64
D12	19	145607	19314.6	29179.4	149417	7031.44
E1	19	47151.7	7573.93	20692.9	127201	4450.31
E2	19	42355.7	7184.18	20468.4	115042	3543.84
E3	19	65679.9	9122.69	23948.8	123933	6053.29
E4	19	34018.2	6002.3	25057	129112	3589.01
E5	19	28766.7	4645.98	24209.8	123925	2927.71
E6	19	141814	23244.1	35379.5	139337	12211.8
E7	19	48495.6	8842.07	26555.3	124853	7619.92
E8	19	35680	6631.34	25546.7	125166	4690.05
E9	19	36513.7	8038.86	27077.3	127210	3462.56
E10	19	38626	6869.29	23813.3	126635	4206.8
E11	19	38349.9	6860.09	22888.8	128982	5777.04
E12	19	54171.6	8947.75	23362	137187	5518.85
F1	19	54414.2	10114.2	23962.1	141548	9595.82
F2	19	49551.9	7944.35	21685.9	125776	3415.29
F3	19	38634.3	6482.66	22272.8	126646	3011.98
F4	19	36362.9	5980.3	25136.8	131813	3362.93
F5	19	31249	5008.34	25827.2	135011	2711.66
F6	19	57092.9	10428.9	29078.5	133034	7129.67
F7	19	33530.7	5668.85	26354.3	133246	4336.61
F8	19	33448.9	5593.96	25838.9	133537	2795.73
F9	19	35478.8	6182.02	24024.1	127569	4506.64
F10	19	36398.1	6269.08	24429.6	135863	4783.79
F11	19	31621.3	5143.13	21975.6	131397	2770.96
F12	19	60822.1	11692.2	26120.8	154067	6140.77
G1	19	52727.4	8366.06	22140.3	146584	3924.43
G2	19	60668	9420.38	23306.5	138360	3537.83
G3	19	49877	7904.79	23130.1	132857	3183.67
G4	19	44722.7	6976.41	25145.4	140966	3071.04
G5	19	41820.5	6469.87	25272.9	138076	3202.73
G6	19	44923.9	7162.53	26528.5	140487	3130.62
G7	19	43614.5	7037.38	26018	139293	3058.23
G8	19	48173.8	8072.66	27299.3	145039	4576.06
G9	19	53625.8	8291.4	26053.7	143201	3537.31
G10	19	75750.2	12498.1	26165.1	141632	4147.46
G11	19	92407.9	15056.8	26170.4	143198	7695.11
G12	19	69595.8	10979.2	23854	156665	3519
H1	19	93929.6	15405.3	24264.8	158004	9090.57
H2	19	76747.1	12250.4	24426.5	157290	4113.01
H3	19	75884.5	12664.7	25128.8	147261	5276.13
H4	19	71511.2	11852.7	26282.1	146159	3497.2
H5	19	74141.5	11284.8	26722.7	149420	3125.73
H6	19	44869.1	7939.9	28241.6	153242	4772.89
H7	19	31058.3	6943.81	4261.63	5608.97	2905.94
H8	19	34650.2	6006.95	3982.38	6653.27	3679.59
H9	19	34663.7	5330.25	3677.03	6500.19	3567.32
H10	19	46903.1	10628.2	7829.21	10741.9	6499.72
H11	19	40585.8	6425.23	4130.76	6833.42	3905.99
H12	19	44070.1	5784.27	3500.41	5838.61	3052.68
A1	20	22298.5	4333.68	13806	96755	3144.09
A2	20	37300.6	6022.44	18747	122946	3477.92
A3	20	34942.5	6073.65	19280.1	118503	3188.32
A4	20	36185.8	6800.99	20638.5	114207	3260.31
A5	20	36116.5	5610.45	21994.7	123422	3561.65
A6	20	49725.9	8951.28	26336.9	138340	5745.9
A7	20	38840.9	6547.99	24738	135488	4536.78
A8	20	203747	34045.7	83692.9	430135	21645.5
A9	20	45417.1	7493.61	23782.1	128773	4220.77
A10	20	34583.7	7103.53	22071.3	131805	4720.22
A11	20	34617	5324.48	20944.5	137773	3347.5
A12	20	42639.2	7432.46	20015	139873	4269.88
B1	20	40527.8	7154.33	18250.6	122708	3613.49
B2	20	45106.6	7430.39	20404.2	123989	3775.23
B3	20	35207.6	5697.22	19038.3	109792	2866.15
B4	20	31721.9	5363.43	21984.2	122400	3760.35
B5	20	34775.7	5487.45	26261.9	148653	4114.95
B6	20	27978.1	4327.33	23512.4	127667	2856.84
B7	20	32633.8	5473.04	23982.4	129186	3797.34
B8	20	118087	18457.3	75920	421235	11258.2
B9	20	38046.5	6573.25	22854.1	124763	3662.92
B10	20	43024.5	6949	23658.2	134451	3590.76
B11	20	46761.5	7868.07	24040.4	143479	5519.42
B12	20	47099.3	8229.09	23533.1	151195	6059.54
C1	20	45895.2	7864.04	20570.5	129409	3801.78
C2	20	49480.2	7656.49	25091.1	153978	4894.27
C3	20	42510.5	6169.66	21085.9	119212	2650.45
C4	20	34044.9	5492.68	23482.9	125516	3043.87
C5	20	33135.1	5677.16	25198.8	126732	4156.64
C6	20	31949.8	5225.54	24982.1	128007	3092.35
C7	20	33709.7	5621.22	25649.6	130626	2175.09
C8	20	38065.8	6261.49	25905.4	132693	3354.36
C9	20	46460.3	8887.84	22856.6	113426	3858.8
C10	20	39147.2	7131.6	25391.1	137826	3830.78
C11	20	35962.4	6499.63	23644.1	141291	3007.34
C12	20	47022.7	7651.61	23081.9	146361	4082.66
D1	20	53603.3	8748.62	21853.8	133866	3401.82
D2	20	45199.3	7475	21148.3	122521	2975.35
D3	20	51335.9	8626.07	23858.8	124904	5315.15
D4	20	34524.5	6471.9	24484.7	124388	4819.67
D5	20	36775.3	5619.89	25066.7	127751	2937.86
D6	20	40569.4	7164.56	26509.7	129096	5265.12
D7	20	31544	5224.77	25111.1	125625	2673.1
D8	20	31772.6	6493.08	25368.7	125535	3078.63
D9	20	36422.2	6277.57	23600.4	124672	3818.34
D10	20	63212.4	10674.8	25399.2	129914	4933.78
D11	20	58698.1	9625.74	25455.4	141827	3799.09
D12	20	152134	20342.3	29266.5	149427	7300.74
E1	20	48317.8	7648.59	20761.6	127459	4305.57
E2	20	42755.6	7323.92	20396.7	115111	3363.42
E3	20	66368.3	9065.06	23945.1	123829	5922.5
E4	20	34661.8	5811.95	24921.3	128593	3173.02
E5	20	29070.6	4769.82	24133.2	123775	2864.36
E6	20	141615	23257.1	35384	139232	12152.2
E7	20	48441.2	8681.34	26535.6	124705	7767.61
E8	20	35835.5	6778.44	25438.2	125160	4911.74
E9	20	36708.3	8086.42	27221.5	126634	3740.28
E10	20	38500.3	6551.24	23731.1	126395	4416.13
E11	20	38428.2	7066.31	22811.3	128650	5896.52
E12	20	54389.6	9281.29	23371.8	136693	5891.08
F1	20	59850.3	11049	23684.7	141405	9523.09
F2	20	53872.5	8607.07	21592	125453	3364.19
F3	20	43657.7	7235.06	22497.8	126593	3007.48
F4	20	38159.3	6090.89	25039.7	131738	3440.33
F5	20	33379	5330.62	25837.2	134540	2609.91
F6	20	58967.9	10764.4	29020.1	133287	7287.5
F7	20	33801.1	5915.16	26240.6	132871	4101.64
F8	20	33902	5619	25837.3	133517	3037.37
F9	20	35643.8	5933.39	24055.6	127453	4377.32
F10	20	36923.8	6441.62	24291.6	135474	4533.94
F11	20	32074.4	5238.71	22097.3	131397	2669.47
F12	20	61705.3	12055.2	26167.4	154156	6186.28
G1	20	60195.5	9262.28	22242.8	146764	4063.62
G2	20	69375.7	10723.9	23137.4	139086	3686.61
G3	20	58977	9123.49	23119.5	132769	3455.55
G4	20	53264.2	7815.58	25085.2	140790	2728
G5	20	49928.9	7532.18	25462	137774	2795.68
G6	20	53433.3	8248.61	26570.3	140182	3024.9
G7	20	52415.4	7964.84	26021.8	139256	2877.04
G8	20	56813	9180.62	27280.9	144688	4469.22
G9	20	63086.5	9516.04	26039.1	142868	3826.39
G10	20	91797.1	14525.6	26147.2	141580	4274.75
G11	20	108117	17139	26073.4	143103	7626.46
G12	20	89618.5	13811.1	23803.9	156677	3269.19
H1	20	122312	19189	24297.9	157680	9008.43
H2	20	104657	16337.7	24459.2	157290	4042.69
H3	20	103745	16325.3	25247.8	147255	5207.74
H4	20	96475.2	14654	26316.4	146287	3392.45
H5	20	103163	14721.2	26693.1	149394	3421.49
H6	20	44965	7756.23	28061.6	153053	4785.89
H7	20	30930.3	7162.45	4220.4	5766.48	2951.18
H8	20	34623.9	5862.91	3870.58	6586.35	3735.33
H9	20	34503.5	5649.21	3639.08	6641.06	3650.45
H10	20	46725.3	10620.1	7951.35	10657.8	6614.26
H11	20	40678.7	6642.5	4306.98	6729.81	3895.84
H12	20	45190.6	5591.81	3425.73	6085.07	3247.53
A1	21	22890.4	4710.45	13645.7	96730.2	2875.95
A2	21	39565.3	6174.66	18773.1	122830	3487.6
A3	21	36420	5842.02	19419.7	118424	2253.08
A4	21	37923.9	6709.96	20636.3	113864	3055.49
A5	21	37764	5837.95	22073.4	123303	3491.91
A6	21	51178.8	8887.71	26324	138755	5330.54
A7	21	39404.3	6741.49	24814.4	135417	4449.86
A8	21	207157	34543.8	83421.8	429548	22313.7
A9	21	45544.9	7413.27	23908.4	128753	4240.55
A10	21	34701.7	7092.17	21992.9	131447	4679.33
A11	21	35707.7	5718.4	20863.5	137488	3592.58
A12	21	43609.6	7320.86	19937.1	140089	3996.88
B1	21	43417.4	7686.72	18581.9	122481	4461.04
B2	21	48134.1	7760.5	20405.6	124082	3902.93
B3	21	37063.6	5991.09	19044.6	110050	3011.28
B4	21	32284.9	5152.7	21752.5	122372	3461.63
B5	21	36210.9	5670.62	26041.8	148514	4184.94
B6	21	29025.7	4446.58	23517.1	127580	2604.79
B7	21	32915.4	5361.15	23977	128928	3764.5
B8	21	118414	17518.6	76094.5	421386	10326.7
B9	21	38445	6553.16	22717.6	124443	3422.53
B10	21	43245.9	6929.25	23532.1	134740	3290.63
B11	21	46577.3	7724.49	24065.7	143268	5416.65
B12	21	47399.6	8702.82	23498.6	150631	5554.93
C1	21	50539.3	8589.21	20667.3	129830	3532.63
C2	21	54367.8	8080.24	24984.5	153679	4850.04
C3	21	47203	6573.26	21124.2	119119	2408.58
C4	21	34895.3	5686.65	23539.4	125531	3444.47
C5	21	34322.7	6056.62	25400.1	126766	3894.84
C6	21	32991.3	5439.84	24986.5	128094	2919.55
C7	21	33973.6	5644.25	25514.4	130658	2282.28
C8	21	38305.5	6218.21	25935.3	132894	3538.62
C9	21	46952.8	9026.12	22762.6	113391	3969.51
C10	21	39639.5	7124.75	25087.3	137879	4278.3
C11	21	36115.7	6481.05	23747.6	141116	3217.18
C12	21	47144.6	7625.48	23288.1	146339	3869.28
D1	21	62159.8	10066.8	21720.8	134162	3515.31
D2	21	52685	8296.34	21079.9	122856	2769.62
D3	21	58116.4	9478.46	24059.7	124770	4861.16
D4	21	35767.6	6208.03	24378.7	124615	4985.69
D5	21	38064.1	6185.85	25062.7	127862	2988.79
D6	21	41791.8	7269.09	26612	129050	5029.48
D7	21	32030.6	5322.34	25193.3	125657	3064.86
D8	21	32123.2	6472.74	25302.6	125849	3353.67
D9	21	37382.5	6403.1	23640.3	124476	4090.95
D10	21	74328.6	11850.8	25219.1	130160	4916.37
D11	21	70476	11143.6	25433.8	141797	3591.62
D12	21	164757	22213.5	29220.1	149337	7312.66
E1	21	50936	8071.28	20647.1	127406	4402.07
E2	21	44845	7400.83	20369.3	115174	3672.12
E3	21	68024.2	9382.94	23722.2	124197	6229.25
E4	21	35540.4	6095.7	24868.1	129152	3455.67
E5	21	30124.4	4985.67	24162.7	124143	2752.77
E6	21	142682	23130.1	35194.8	139708	12076.1
E7	21	48421.7	8442.02	26482.8	124929	7802.64
E8	21	35875.5	6801.91	25583.4	125280	4971.25
E9	21	36791.4	8039.74	27151.7	126953	3381.21
E10	21	39131.8	6637.42	23799.7	125998	4384.91
E11	21	38560.2	6954.52	22792.1	128728	5822.92
E12	21	54649	9333.95	23414.1	136847	5804.03
F1	21	69005.4	12592.8	23684.7	141373	9764.23
F2	21	62195.9	9699.74	21631.4	125362	3497.04
F3	21	52182.8	8180.71	22521.7	126492	2866.92
F4	21	41744.2	6720.09	25086.6	131664	3368.15
F5	21	36864.5	5639.14	25751.5	134490	2905.83
F6	21	61955.3	11158.1	29033.3	133206	7054.73
F7	21	35113	6064.81	26321.2	132993	4433.07
F8	21	34743	5676.1	25822.7	133619	2922.74
F9	21	35972.9	6217.42	24164.8	127503	4359.45
F10	21	38038.1	6353.23	24333.6	135626	4603.83
F11	21	33460.3	5438.92	21756.9	131301	3137.1
F12	21	62878.8	12153	26089.6	154297	6410.53
G1	21	75228.3	11497.2	22248	146817	4370.35
[truncated: 10,487 more rows]

## Sheet: Multicomponent Data
Block Type	96alum
Chemistry	SYBR_GREEN
Experiment File Name	D:\ShuJu\LZM\16+actin + plc 1-3 zuzhi.eds
Experiment Run End Time	2023-07-14 11:23:36 AM CST
Instrument Type	sds7500
Passive Reference	ROX
Well	Cycle	SYBR	ROX
A1	1	21284.3	97544.6
A2	1	35096	124487
A3	1	32373.2	119243
A4	1	33492.4	115478
A5	1	33417.7	124820
A6	1	44507.9	139827
A7	1	37413	137565
A8	1	189977	434671
A9	1	41870.4	130904
A10	1	32321.4	133897
A11	1	34079.3	140985
A12	1	40003	141004
B1	1	37619.9	124580
B2	1	40571.8	126411
B3	1	32363.7	111237
B4	1	30949	124935
B5	1	33958.6	151367
B6	1	26970.4	130665
B7	1	32558.3	132024
B8	1	116419	430427
B9	1	37543.4	127602
B10	1	39970.7	137143
B11	1	44454	146086
B12	1	44090.4	153009
C1	1	39054.7	129705
C2	1	42837.4	154575
C3	1	38322	120793
C4	1	32814.4	128541
C5	1	32544.8	130614
C6	1	30642.7	131580
C7	1	33730.9	134762
C8	1	38221.6	136330
C9	1	47782.7	120753
C10	1	38920.8	139521
C11	1	34436.5	143418
C12	1	42977.7	148022
D1	1	43933.2	134625
D2	1	36717.6	123733
D3	1	44173.7	127159
D4	1	33498.6	127137
D5	1	35069.3	131706
D6	1	39242.3	132689
D7	1	31484.2	130025
D8	1	31409.5	129073
D9	1	36251.4	128037
D10	1	52348.3	133158
D11	1	45815.5	143491
D12	1	122638	148644
E1	1	44524.2	129037
E2	1	41159.9	116245
E3	1	65639.3	125687
E4	1	33560.5	132455
E5	1	28363.8	127570
E6	1	144972	144518
E7	1	49376.2	129242
E8	1	35962.3	129686
E9	1	36859.3	130649
E10	1	39437	130179
E11	1	37803.3	129983
E12	1	49291.2	138611
F1	1	46854.5	141988
F2	1	39641.8	127440
F3	1	34061.1	128524
F4	1	34653.2	133699
F5	1	29894.8	138058
F6	1	55546.1	136391
F7	1	32787.7	136187
F8	1	33318	136789
F9	1	35480	129720
F10	1	34726.5	137665
F11	1	29688.2	133167
F12	1	56024.2	155882
G1	1	43415.2	148394
G2	1	48607.9	140863
G3	1	39281.1	134439
G4	1	36212.5	142535
G5	1	33816.2	140530
G6	1	35820.3	143060
G7	1	34080.1	142578
G8	1	37744.2	147448
G9	1	43715.9	145317
G10	1	55316.3	143332
G11	1	67941.8	145020
G12	1	46358.9	158622
H1	1	59619.5	159812
H2	1	44322.9	160349
H3	1	41551.1	151770
H4	1	40005	148422
H5	1	37985.5	151997
H6	1	43640.2	155609
H7	1
H8	1
H9	1
H10	1
H11	1
H12	1
A1	2	21177.2	98213.3
A2	2	35518	124143
A3	2	32474.8	118769
A4	2	33344.3	115125
A5	2	33685	124895
A6	2	45201.7	140295
A7	2	37923.7	137650
A8	2	193659	434239
A9	2	41736.6	130842
A10	2	32688.6	133444
A11	2	33566.1	140050
A12	2	40486.9	141061
B1	2	37172.3	124087
B2	2	40675.4	125226
B3	2	32410.9	109873
B4	2	31420.7	123442
B5	2	34075.5	150334
B6	2	26769.9	129204
B7	2	32737.8	130768
B8	2	116955	426407
B9	2	37900.5	126687
B10	2	41018.5	135916
B11	2	44720	144533
B12	2	44605.8	152965
C1	2	39694.3	129801
C2	2	43397.7	153212
C3	2	38372.8	119866
C4	2	33043.9	127362
C5	2	32477.1	129502
C6	2	30615.8	130233
C7	2	33776.7	133478
C8	2	38193.7	135105
C9	2	47443.3	117408
C10	2	38916.4	138527
C11	2	35071.5	142056
C12	2	44123.1	148309
D1	2	44458.9	134083
D2	2	37012.7	123051
D3	2	43700.8	125421
D4	2	33437.2	125525
D5	2	34879.5	130365
D6	2	39374.5	131715
D7	2	31091	128352
D8	2	31454	128031
D9	2	36084.8	126663
D10	2	52373.2	132278
D11	2	45938.3	142470
D12	2	125233	149587
E1	2	44818.7	128646
E2	2	40927.3	115160
E3	2	65520.2	124624
E4	2	33422.4	131053
E5	2	28238.4	125971
E6	2	144915	143468
E7	2	49336.4	127871
E8	2	35584.4	128166
E9	2	36936.1	129393
E10	2	39301.3	128927
E11	2	37835.7	129127
E12	2	49867.4	139034
F1	2	47542.8	142043
F2	2	40559.7	125878
F3	2	34353.6	126877
F4	2	34652.9	132483
F5	2	29928.4	136691
F6	2	55687.6	135364
F7	2	32594	135241
F8	2	33199.4	135571
F9	2	35481.2	128610
F10	2	35051	136734
F11	2	29933.2	132214
F12	2	57369.1	156660
G1	2	43179.4	147994
G2	2	49193.8	139427
G3	2	39312.7	133408
G4	2	35808.5	141511
G5	2	33698.3	139284
G6	2	35820.4	141953
G7	2	34040.7	141161
G8	2	38161.2	146583
G9	2	43668.2	144421
G10	2	56325.9	142600
G11	2	67982.8	143865
G12	2	46567.6	158559
H1	2	59420	160470
H2	2	44487.1	159485
H3	2	41503.9	150383
H4	2	40252.8	148398
H5	2	38143.3	151320
H6	2	44200.6	155925
H7	2
H8	2
H9	2
H10	2
H11	2
H12	2
A1	3	21461.8	97923.3
A2	3	35484.4	123253
A3	3	32749.6	118669
A4	3	33946.9	114893
A5	3	33912.8	124763
A6	3	45461.8	139711
A7	3	38166.8	137162
A8	3	195153	432829
A9	3	42818.8	130847
A10	3	32933.5	133074
A11	3	34323.8	139618
A12	3	40906.8	141391
B1	3	36955.1	123526
B2	3	41365.7	124638
B3	3	32411.9	109955
B4	3	31368	123149
B5	3	33713.6	149891
B6	3	26929	129006
B7	3	32769.4	130140
B8	3	117464	423973
B9	3	38169.3	126322
B10	3	41466.3	135186
B11	3	45001	143944
B12	3	45016.9	152658
C1	3	39818.7	129468
C2	3	43377.9	153534
C3	3	38548.9	119738
C4	3	33190.4	126413
C5	3	32516.3	128749
C6	3	30836.7	129456
C7	3	33803.4	132520
C8	3	38334.6	134370
C9	3	47905.5	115944
C10	3	39090.6	138301
C11	3	35095.9	141921
C12	3	44383.1	148373
D1	3	44418.6	134279
D2	3	37158.8	122917
D3	3	43787.7	125435
D4	3	33279.8	125185
D5	3	34966.9	129409
D6	3	39439.4	130760
D7	3	31544.1	127931
D8	3	31376.9	127340
D9	3	36370.6	126305
D10	3	52222	131673
D11	3	46381	142468
D12	3	126589	149360
E1	3	44228.7	128133
E2	3	40990.6	115144
E3	3	64894	124068
E4	3	33492	130539
E5	3	28254.8	125835
E6	3	144006	142564
E7	3	49296.8	126970
E8	3	35570.1	127321
E9	3	36581.5	128934
E10	3	39305.1	128289
E11	3	38285.6	129307
E12	3	50288.2	139074
F1	3	47534.4	141308
F2	3	41166.4	125750
F3	3	34264.8	126689
F4	3	34529.7	132216
F5	3	29753.5	136413
F6	3	55537.2	134971
F7	3	32916.7	134545
F8	3	33245.5	135087
F9	3	35335.7	128501
F10	3	35175.8	136532
F11	3	30278.6	131784
F12	3	57754.2	156259
G1	3	43378.4	147365
G2	3	49327.7	139013
G3	3	39637.4	132927
G4	3	35865	141622
G5	3	33727.9	139231
G6	3	35804.6	141282
G7	3	33957.4	140532
G8	3	38334.1	146095
G9	3	43571.2	144042
G10	3	56821.8	142721
G11	3	68190	143848
G12	3	46352.1	158309
H1	3	59561.1	160301
H2	3	44478.6	159267
H3	3	41057.1	149903
H4	3	40418.9	147731
H5	3	37881.7	150859
H6	3	44275.9	155359
H7	3
H8	3
H9	3
H10	3
H11	3
H12	3
A1	4	21479.4	98317.7
A2	4	35328.7	123101
A3	4	33163	119006
A4	4	33887.8	114661
A5	4	33922	124164
A6	4	45503.2	139401
A7	4	38398.6	136648
A8	4	194981	433088
A9	4	42862.9	130576
A10	4	33166.9	132703
A11	4	34075.1	138590
A12	4	41206.8	141680
B1	4	37656.6	123438
B2	4	40816.6	124351
B3	4	32404.7	109991
B4	4	31575.6	123337
B5	4	33768.6	149936
B6	4	26961.1	128710
B7	4	32530.7	130208
B8	4	117571	423848
B9	4	38085.4	126430
B10	4	41916.4	135161
B11	4	45616.6	143959
B12	4	45554.9	152574
C1	4	39914.3	129690
C2	4	43859.5	153666
C3	4	38042.5	119758
C4	4	33011.3	126733
C5	4	32531	128989
C6	4	30352.8	129729
C7	4	34122.8	132283
C8	4	38118	134359
C9	4	47867.1	115414
C10	4	39078.6	138223
C11	4	35640.3	141823
C12	4	44567	147576
D1	4	44729.4	134165
D2	4	37017.7	122862
D3	4	43732.9	125603
D4	4	33179.3	125255
D5	4	34966.4	129349
D6	4	39310.7	130651
D7	4	31448.8	127525
D8	4	31178	127114
D9	4	36486.4	126236
D10	4	52145.8	131505
D11	4	46499.7	142513
D12	4	127819	149812
E1	4	44804.5	128036
E2	4	41248.6	115552
E3	4	64938.3	124678
E4	4	33725.3	130407
E5	4	28239.5	125337
E6	4	143375	142473
E7	4	48986.3	127062
E8	4	35689.2	127092
E9	4	37136.8	128984
E10	4	38820.5	128479
E11	4	38189	129275
E12	4	50631	138374
F1	4	47347	141367
F2	4	41813.3	125788
F3	4	33957.6	126555
F4	4	34742.3	132241
F5	4	29742.1	135993
F6	4	55107.6	134768
F7	4	32777.9	134276
F8	4	33113.1	134876
F9	4	35288.8	128422
F10	4	34847.1	136254
F11	4	30600.6	131330
F12	4	58275.1	155873
G1	4	43304	147133
G2	4	49364.5	138755
G3	4	39377.8	132843
G4	4	36053.2	141268
G5	4	33349.5	138930
G6	4	35720.8	141307
G7	4	34130.3	140272
G8	4	38378.4	145652
G9	4	43681	143861
G10	4	56964.8	142382
G11	4	68380.6	143235
G12	4	46808.8	158083
H1	4	59800.4	160411
H2	4	44019.9	158384
H3	4	41375.2	149077
H4	4	40501.1	147617
H5	4	38125	150894
H6	4	44491.9	155110
H7	4
H8	4
H9	4
H10	4
H11	4
H12	4
A1	5	21298.1	98221.6
A2	5	35320.4	122952
A3	5	32971.5	118950
A4	5	34033.4	114757
A5	5	34246.9	124296
A6	5	45732.7	139582
A7	5	38105.8	136762
A8	5	197920	432814
A9	5	43050.8	130217
A10	5	32794.2	132707
A11	5	34002.1	138964
A12	5	41156.6	141532
B1	5	37388.2	123273
B2	5	41022.7	124324
B3	5	32640.4	110003
B4	5	31455.2	123028
B5	5	33585.3	149690
B6	5	26791.9	128582
B7	5	32507.9	130190
B8	5	116149	423172
B9	5	38138.5	126372
B10	5	42434.7	135183
B11	5	45853.1	143769
B12	5	45329	152109
C1	5	40544.9	129825
C2	5	43597	153558
C3	5	38189	119819
C4	5	32785.5	126626
C5	5	32625.5	128461
C6	5	30616.9	129536
C7	5	33761.4	132442
C8	5	38010.9	134195
C9	5	47721.2	115311
C10	5	39326.5	138131
C11	5	35393.2	141507
C12	5	45342.7	147500
D1	5	44514.4	134185
D2	5	36931.9	122898
D3	5	43553.3	125702
D4	5	33120.3	125546
D5	5	35068.6	129316
D6	5	39350.1	130231
D7	5	31254.6	127350
D8	5	31178.1	126981
D9	5	36282.6	126430
D10	5	52124.9	131213
D11	5	46034.6	142432
D12	5	129241	149670
E1	5	45365.2	127733
E2	5	40780.9	115576
E3	5	64765.1	124719
E4	5	33255	130581
E5	5	28130.9	125175
E6	5	142906	141917
E7	5	49101.7	126760
E8	5	35661	126989
E9	5	36721.5	128567
E10	5	38958.4	127872
E11	5	38324.4	129521
E12	5	50785.5	138311
F1	5	47633.9	141379
F2	5	41939.9	126239
F3	5	34018.2	126909
F4	5	34791.8	132408
F5	5	30038.5	135922
F6	5	55166.4	134530
F7	5	32697.2	134277
F8	5	33214.6	134870
F9	5	35202.1	128460
F10	5	35232.9	136237
F11	5	30661.3	131982
F12	5	58581.1	156269
G1	5	43065.6	147589
G2	5	49665.1	138766
G3	5	39581.8	132981
G4	5	35585.9	141465
G5	5	33701.4	139038
G6	5	35768.9	141614
G7	5	34342	140486
G8	5	38370.5	145986
G9	5	43975.9	143847
G10	5	56949.5	142476
G11	5	68795.6	143612
G12	5	46708.6	158111
H1	5	59911.2	161031
H2	5	44226.5	158532
H3	5	40875.3	149056
H4	5	40696	147194
H5	5	38294.7	150606
H6	5	44797.8	154961
H7	5
H8	5
H9	5
H10	5
H11	5
H12	5
A1	6	21490.9	97828.5
A2	6	35380.5	123147
A3	6	33321.4	118716
A4	6	33865.9	114456
A5	6	34203	124506
A6	6	45943.3	139274
A7	6	38443	136601
A8	6	198713	431618
A9	6	43350.9	130296
A10	6	33096	132635
A11	6	34158	139166
A12	6	41077.9	141166
B1	6	37170.4	123121
B2	6	41451.4	124182
B3	6	32148.6	110155
B4	6	31378.5	123057
B5	6	33622.7	149706
B6	6	26753	128383
B7	6	32680.5	130476
B8	6	116747	423537
B9	6	38274.3	126027
B10	6	42579.1	135056
B11	6	46167.1	143940
B12	6	45653.7	151957
C1	6	40473.6	129969
C2	6	43698.2	153356
C3	6	37905.4	119651
C4	6	32967.5	126363
C5	6	32264.5	128234
C6	6	30522.1	129204
C7	6	33868.1	132230
C8	6	38150.5	134223
C9	6	47775.4	115367
C10	6	38837.2	138229
C11	6	35262.6	141564
C12	6	45501.6	147269
D1	6	45066.6	134437
D2	6	36883.6	122959
D3	6	43783.9	125900
D4	6	32777.3	125210
D5	6	34892.9	128755
D6	6	39289.1	130435
D7	6	31187.4	127015
D8	6	31116.5	126926
D9	6	36550.3	125765
D10	6	51960.1	131439
D11	6	46202.9	142429
D12	6	130705	149904
E1	6	45509.7	127767
E2	6	41047.7	115310
E3	6	64668	124842
E4	6	33268.1	130298
E5	6	28206	125087
E6	6	142625	142063
E7	6	48691.9	126660
E8	6	35562.7	126674
E9	6	36879.6	128630
E10	6	38860.2	128000
E11	6	38103.5	129185
E12	6	50955.1	138208
F1	6	47826.6	141416
F2	6	42247	125728
F3	6	34147.3	126837
F4	6	34639.4	132317
F5	6	29911.7	135807
F6	6	55418.4	134659
F7	6	32905.3	134027
F8	6	33339.8	134769
F9	6	35079.2	128513
F10	6	35526	136237
F11	6	30652.9	131594
F12	6	58778.8	155812
G1	6	43403.8	146995
G2	6	49684.9	138777
G3	6	39817.9	132980
G4	6	35557.9	141502
G5	6	33562	138735
G6	6	35566.9	141418
G7	6	34253.4	140288
G8	6	38247.2	145817
G9	6	43405.3	144034
G10	6	57316.2	142522
G11	6	69449.8	143592
G12	6	46839.9	158051
H1	6	59530.1	160534
H2	6	44221.9	158543
H3	6	40678.1	148827
H4	6	40681.5	147208
H5	6	38448.6	150416
H6	6	44928.7	154796
H7	6
H8	6
H9	6
H10	6
H11	6
H12	6
A1	7	21392.8	98067.2
A2	7	35592.6	123262
A3	7	32660.6	118852
A4	7	34223.3	114646
A5	7	34142.5	124068
A6	7	46161.1	139434
A7	7	38291.9	136437
A8	7	199527	432552
A9	7	43622.9	130713
A10	7	33844.3	132539
A11	7	34123.9	138795
A12	7	41383	141248
B1	7	37048.4	123572
B2	7	41303.4	124648
B3	7	31970.7	109954
B4	7	31362.4	123402
B5	7	33857.8	149649
B6	7	26952.2	128988
B7	7	32748.5	129959
B8	7	117746	424574
B9	7	38247	126160
B10	7	42406.5	135528
B11	7	46032.5	144108
B12	7	45481.6	152247
C1	7	40964.3	130104
C2	7	43574.3	154150
C3	7	38360.2	119783
C4	7	32810	126654
C5	7	32094.9	128369
C6	7	30713.4	129476
C7	7	33600.7	132318
C8	7	38086	134203
C9	7	47532.5	115143
C10	7	38942.9	138474
C11	7	35500.1	141730
C12	7	45484.1	147499
D1	7	44985.1	134429
D2	7	37219.6	123352
D3	7	43543.9	125568
D4	7	33152	125402
D5	7	35066.1	129272
D6	7	39001.1	130538
D7	7	31162.1	127486
D8	7	31004.6	127118
D9	7	36093	126301
D10	7	52211.4	131407
D11	7	46321.7	142843
D12	7	131844	149807
E1	7	45272.9	127899
E2	7	41504	115622
E3	7	64503.9	124599
E4	7	33254.9	130435
E5	7	28369.3	125348
E6	7	142482	141837
E7	7	48683.4	126543
E8	7	35496.6	127126
E9	7	36787.3	128760
E10	7	38662.7	127959
E11	7	38239.1	129603
E12	7	51252.2	138141
F1	7	48102.2	141992
F2	7	42631.1	125722
F3	7	34182.7	127277
F4	7	34940.9	132723
F5	7	30101.1	135734
F6	7	55364.5	134750
F7	7	32908.1	134235
F8	7	33159.7	134560
F9	7	35179.6	128723
F10	7	35330.1	136500
F11	7	30831.2	132171
F12	7	59518.9	155760
G1	7	43573.1	147125
G2	7	49868.8	139341
G3	7	39737	132886
G4	7	35650.7	141377
G5	7	33680	138964
G6	7	35573.3	141460
G7	7	34082.4	140404
G8	7	38629.4	145749
G9	7	43533.9	143876
G10	7	57403.7	142667
G11	7	69521.7	143545
G12	7	47000.2	157718
H1	7	59890.4	160213
H2	7	43626.9	158637
H3	7	41130.2	148873
H4	7	40970.1	147403
H5	7	38509.1	150643
H6	7	44747.3	154896
H7	7
H8	7
H9	7
H10	7
H11	7
H12	7
A1	8	21728.8	97591.4
A2	8	35394.2	123161
A3	8	33152.5	118620
A4	8	34534.9	114648
A5	8	34434.7	124239
A6	8	46578.4	139337
A7	8	38337.6	136723
A8	8	199991	432630
A9	8	43696	129953
A10	8	33568.6	132551
A11	8	33894.4	138564
A12	8	41201	141024
B1	8	37288	123662
B2	8	41811.2	124144
B3	8	32831.7	109892
B4	8	31447.6	123432
B5	8	34108.5	149574
B6	8	27063	128667
B7	8	32774.9	130323
B8	8	117756	424500
B9	8	38003.1	126164
B10	8	42559.5	135657
B11	8	46444.5	144130
B12	8	45791.1	152047
C1	8	40919.6	130114
C2	8	43996.1	154254
C3	8	38284.6	119607
C4	8	32899.2	126288
C5	8	32641.8	128004
C6	8	30470.9	129234
C7	8	33764.8	132043
C8	8	38207.7	134204
C9	8	47390.3	115185
C10	8	39151.7	138228
C11	8	35754.9	141283
C12	8	46317.8	147648
D1	8	45097	134398
D2	8	36793.6	123071
D3	8	43883.4	125460
D4	8	33284.6	125127
D5	8	34903.4	129035
D6	8	39251.8	130067
D7	8	31028.7	127132
D8	8	31181.8	126763
D9	8	35912.6	125918
D10	8	51933.5	131451
D11	8	46561.6	142562
D12	8	132860	150454
E1	8	45501.3	127721
E2	8	41239.5	115631
E3	8	64853.8	124654
E4	8	33106.5	130372
E5	8	28364.1	124896
E6	8	142239	141574
E7	8	48905.5	126532
E8	8	35350	126958
E9	8	36876.3	128608
E10	8	38679.3	127839
E11	8	38424.1	129429
E12	8	51720.1	138235
F1	8	48286.9	141681
F2	8	42254.6	125701
F3	8	34318.7	127125
F4	8	34924.6	132161
F5	8	29937.9	135775
F6	8	55397.4	134585
F7	8	32728	134168
F8	8	33367	134732
F9	8	35177.7	128670
F10	8	35216.4	136393
F11	8	30878.4	131819
F12	8	59208.3	155606
G1	8	43631.1	147232
G2	8	49788.1	139452
G3	8	40114.9	133003
G4	8	35644.2	141453
G5	8	33512.5	138862
G6	8	35925.9	140990
G7	8	34075.3	140421
G8	8	38730.5	145719
G9	8	43581.4	144212
G10	8	57330.9	142628
G11	8	70106.2	143367
G12	8	47043.6	158057
H1	8	59785.2	159804
H2	8	44145.5	158384
H3	8	40676.9	148331
H4	8	41036	147249
H5	8	38410.7	150337
H6	8	45036.9	154781
H7	8
H8	8
H9	8
H10	8
H11	8
H12	8
A1	9	21455.6	97733.9
A2	9	35138.1	123637
A3	9	33117.9	118729
A4	9	34696.3	114902
A5	9	34371.9	124117
A6	9	46708.2	139360
A7	9	38404.2	136507
A8	9	200513	432016
A9	9	44031.4	130254
A10	9	33503.6	132343
A11	9	34079.6	138565
A12	9	41657.2	141011
B1	9	37698.9	123439
B2	9	41599.9	124624
B3	9	32415.2	110272
B4	9	31647.4	123385
B5	9	34014.6	149615
B6	9	26748.4	128718
B7	9	32872.4	129815
B8	9	117485	424590
B9	9	38370	125988
B10	9	42740.5	135352
B11	9	46015.6	143992
B12	9	46038.7	151941
C1	9	41188.1	129645
C2	9	43559.1	153811
C3	9	37991.4	119664
C4	9	33180	126284
C5	9	32335	128166
C6	9	30383.5	129072
C7	9	34007.5	131837
C8	9	38022.8	133889
C9	9	47546.3	115349
C10	9	39157.5	138282
C11	9	35204	142040
C12	9	46397.6	146975
D1	9	44879.1	134448
D2	9	37368	123563
D3	9	43620.8	125443
D4	9	33119.5	125206
D5	9	35000.8	128986
D6	9	39174.3	130555
D7	9	31586.3	127155
D8	9	31180.6	126873
D9	9	36112.4	126206
D10	9	52194.5	131157
D11	9	46550.9	142852
D12	9	133610	149773
E1	9	45466.8	128286
E2	9	41398.1	115719
E3	9	64529.7	124724
E4	9	33063.7	129972
E5	9	28094.8	125196
E6	9	142447	141768
E7	9	48809	126221
E8	9	35473	126528
E9	9	36907.3	128309
E10	9	38499.7	127794
E11	9	38256.1	129708
E12	9	51884.9	138169
F1	9	48728.9	141464
F2	9	42847.5	126525
F3	9	34416	127005
F4	9	34966	132477
F5	9	29811.7	135706
F6	9	55323.6	134671
F7	9	32796	134018
F8	9	33576.7	134484
F9	9	35121.2	128515
F10	9	35088.3	136669
F11	9	31154.5	131866
F12	9	59688.7	155757
G1	9	43394.5	146928
G2	9	49936	139150
G3	9	40211.8	133097
G4	9	35867.2	141426
G5	9	33438.7	139024
G6	9	35623.4	141184
G7	9	33959.2	140388
G8	9	38292.3	146080
G9	9	43613.5	144253
G10	9	57295.3	142516
G11	9	69906.1	143487
G12	9	47310.1	157631
H1	9	59596	160169
H2	9	44293.7	158347
H3	9	40771.4	148387
H4	9	41003.7	147090
H5	9	38609.7	150403
H6	9	45160.8	154660
H7	9
H8	9
H9	9
H10	9
H11	9
H12	9
A1	10	21439.7	97536.8
A2	10	35791.3	123304
A3	10	33593.5	118625
A4	10	34383.6	114702
A5	10	34121.5	124445
A6	10	46809.2	139015
A7	10	38363.1	136685
A8	10	201379	432997
A9	10	43958.2	129606
A10	10	33673.2	132674
A11	10	34116.5	138622
A12	10	41449.8	140994
B1	10	37856.5	123115
B2	10	41695.7	124946
B3	10	32824.9	110011
B4	10	31342.5	123529
B5	10	33939.7	149417
B6	10	27013.6	128502
B7	10	32664.5	129839
B8	10	117849	423773
B9	10	38254.4	126255
B10	10	42557.8	135293
B11	10	46222.8	144076
B12	10	46132.1	151713
C1	10	41139.1	130185
C2	10	44173.8	154006
C3	10	37951.4	120029
C4	10	32768.6	126655
C5	10	32256.4	128338
C6	10	30695.4	129366
C7	10	33861.7	131992
C8	10	38206.1	134043
C9	10	47448.3	115248
C10	10	39418.3	138443
C11	10	35524.7	141813
C12	10	46847.1	147377
D1	10	45001.3	134201
D2	10	36918.7	123721
D3	10	43280.9	125534
D4	10	33206.3	125836
D5	10	35379	129050
D6	10	39279.8	130207
D7	10	31365.8	127131
D8	10	31549.9	126937
D9	10	36339.2	126254
D10	10	51819.8	131288
D11	10	46204.4	142832
D12	10	134516	150143
E1	10	45756.7	128185
E2	10	41201.5	115766
E3	10	64492.7	124851
E4	10	33359.2	129904
E5	10	28232.4	125275
E6	10	142622	141805
E7	10	48777.6	126268
E8	10	35279.6	126578
E9	10	36599.3	128440
E10	10	38712.4	127776
E11	10	38354.7	129534
E12	10	52021.2	137923
F1	10	48749.3	141911
F2	10	42851.4	126425
F3	10	34070.6	127119
F4	10	35071	132561
F5	10	30053.2	135624
F6	10	55550	134587
F7	10	32873.9	134269
F8	10	33106.3	134783
F9	10	35105.8	128745
F10	10	35149	136436
F11	10	30595.5	131825
F12	10	59735	155606
G1	10	43513.9	147118
G2	10	50125	139024
G3	10	40311.3	133208
G4	10	35635.7	141615
G5	10	33391.5	138945
G6	10	35622.4	141716
G7	10	34120	140046
G8	10	38453.7	145916
G9	10	43808.8	143915
G10	10	57873.6	142592
G11	10	69904.4	143914
G12	10	47614.2	158146
H1	10	59836.5	159477
H2	10	44048	157842
H3	10	41015.8	148674
H4	10	41191	147384
H5	10	38701.1	150511
H6	10	45001.3	154499
H7	10
H8	10
H9	10
H10	10
H11	10
H12	10
A1	11	21782.3	97507.5
A2	11	35370.8	123250
A3	11	33643.9	119125
A4	11	34926.8	114809
A5	11	34333.2	124164
A6	11	46509.2	139366
A7	11	38552	136349
A8	11	200953	433474
A9	11	43848.5	130351
A10	11	33790.7	132353
A11	11	33710.7	138524
A12	11	41634.8	140971
B1	11	37561.6	122968
B2	11	41929.8	124506
B3	11	32156.3	110178
B4	11	31298.9	123587
B5	11	33927.1	149638
B6	11	27013.7	128875
B7	11	32477	130241
B8	11	116665	424056
B9	11	38093.5	126055
B10	11	43217.9	135542
B11	11	46167	144815
B12	11	46576.6	151776
C1	11	40982.6	130194
C2	11	44102.5	154413
C3	11	37741.2	119493
C4	11	32849.1	126525
C5	11	32542.7	128148
C6	11	30714.2	129640
C7	11	33752.8	131884
C8	11	38422.3	134412
C9	11	47282.9	115406
C10	11	39111.3	138634
C11	11	35621.8	142209
C12	11	46489.3	147706
D1	11	45084.9	134577
D2	11	36983	123132
D3	11	43628.4	125451
D4	11	32926.6	125527
D5	11	35045.9	129214
D6	11	39372	130228
D7	11	31469.5	127075
D8	11	31167.4	127005
D9	11	36162.4	125873
D10	11	52124.7	131357
D11	11	46276.5	142892
D12	11	135057	150166
E1	11	45621.9	128431
E2	11	41129.1	115712
E3	11	64212.9	125179
E4	11	33181.6	130356
E5	11	28285.1	125290
E6	11	142244	141584
E7	11	48810.6	125945
E8	11	35438.3	126779
E9	11	36719.9	128375
E10	11	38618.8	127701
E11	11	38318.7	129642
E12	11	52282.5	137980
F1	11	48642.8	141734
F2	11	42794.5	126276
F3	11	34133.8	127108
F4	11	35000.4	132679
F5	11	29885.6	135985
F6	11	55426.6	134484
F7	11	32637.5	134115
F8	11	33477.6	134674
F9	11	35117.6	128602
F10	11	35324.4	136622
F11	11	30915.9	132424
F12	11	59709.3	155463
G1	11	43338.3	147262
G2	11	50213.9	139383
G3	11	40427.8	133583
G4	11	35564.3	141496
G5	11	33548.5	138985
G6	11	35473.2	141260
G7	11	33935.1	140391
G8	11	38430.7	145912
G9	11	43333.5	144412
G10	11	57817.6	142217
G11	11	70152.8	143770
G12	11	46939	157505
H1	11	59718.8	159213
H2	11	44241.4	158498
H3	11	41172.9	148562
H4	11	41360.5	147019
H5	11	38786.1	150525
H6	11	45245.4	154683
H7	11
H8	11
H9	11
H10	11
H11	11
H12	11
A1	12	21683.6	97250.6
A2	12	36145.6	123477
A3	12	33614.6	118826
A4	12	34638.2	115118
A5	12	34141.9	124120
A6	12	46166.4	139352
A7	12	38614.7	136312
A8	12	201132	432228
A9	12	44176.9	130158
A10	12	33704	132116
A11	12	34191.4	138647
A12	12	41797.7	141211
B1	12	37576.2	123199
B2	12	41815.1	124687
B3	12	32459.1	110357
B4	12	31296.7	123353
B5	12	34023.9	149555
B6	12	26904.5	128542
B7	12	32513.6	130123
B8	12	117448	424210
B9	12	38157.5	126135
B10	12	42808.6	135027
B11	12	46386.2	144080
B12	12	46578.7	151960
C1	12	41199.5	130062
C2	12	43945.8	154322
C3	12	37750.1	119813
C4	12	32814.5	126282
C5	12	32706.3	128101
C6	12	30779.3	129352
C7	12	33850.7	131850
C8	12	38304.3	134090
C9	12	47437.6	115017
C10	12	39654.8	138515
C11	12	35772.8	141837
C12	12	46621	147271
D1	12	44962.9	134471
D2	12	37445.8	123440
D3	12	43807.7	125741
D4	12	33212.2	125207
D5	12	34878.3	128816
D6	12	39482.9	130093
D7	12	31312.8	126691
D8	12	31103.5	126415
D9	12	35979	125906
D10	12	52057.7	131324
D11	12	46464.9	142685
D12	12	135728	150068
E1	12	45835.2	128216
E2	12	41157.7	115854
E3	12	64703.2	124880
E4	12	33176.4	130057
E5	12	28434	124847
E6	12	142522	141841
E7	12	48803.3	126125
E8	12	35585.1	126286
E9	12	36580.7	128397
E10	12	38665.8	127747
E11	12	38362.6	129501
E12	12	52382.8	138021
F1	12	48894.1	141631
F2	12	42943.6	126219
F3	12	33989.8	126960
F4	12	35131.2	132571
F5	12	29617	135866
F6	12	55485.2	134832
F7	12	32750.1	133819
F8	12	32976.2	134613
F9	12	34839.1	128500
F10	12	35455.8	136630
F11	12	30846.8	132122
F12	12	59857.5	155677
G1	12	43332.1	147601
G2	12	50062.8	139305
G3	12	40299.4	133314
G4	12	35672.6	141397
G5	12	33588.4	138890
G6	12	35749.3	141351
G7	12	34236	140288
G8	12	38558.8	145717
G9	12	43562.2	143910
G10	12	57752.7	142897
G11	12	70734.3	143927
G12	12	47514.3	157761
H1	12	59958.5	159301
H2	12	44369	157723
H3	12	41171.6	148426
H4	12	41478.6	147168
H5	12	39090.6	150358
H6	12	44999.5	154460
H7	12
H8	12
H9	12
H10	12
H11	12
H12	12
A1	13	21369.7	96946.6
A2	13	35798.4	123530
A3	13	34115	119394
A4	13	34707.9	114562
A5	13	34253.6	124259
A6	13	46707.4	139517
A7	13	38121.1	136663
A8	13	202803	433496
A9	13	44211.5	129888
A10	13	33529.3	132651
A11	13	34113.6	138571
A12	13	41033.6	140629
B1	13	37028	123337
B2	13	42363.1	124939
B3	13	32411.2	110728
B4	13	31277.8	123623
B5	13	33626	149777
B6	13	26663.8	128765
B7	13	32944.7	130301
B8	13	117855	424352
B9	13	38520.4	126057
B10	13	43009.8	135492
B11	13	46367.2	144112
B12	13	46180.5	152041
C1	13	41565.5	129831
C2	13	44364.2	155002
C3	13	37837.5	120290
C4	13	33184.7	126616
C5	13	32838.9	128636
C6	13	30541.5	129618
C7	13	33616.9	131837
C8	13	38186.4	133936
C9	13	47159.4	114980
C10	13	39327.9	138472
C11	13	35300	142247
C12	13	46419.1	146927
D1	13	45380.8	134355
D2	13	37182.7	123820
D3	13	43470.2	125734
D4	13	33197.9	125516
D5	13	35192.5	128868
D6	13	39396.6	130603
D7	13	31249.9	127093
D8	13	31185.6	127066
D9	13	36260.6	125978
D10	13	52277.6	131609
D11	13	46473.5	143035
D12	13	135883	150194
E1	13	46047.7	128336
E2	13	41158.3	116309
E3	13	64356.1	124773
E4	13	33316.3	130435
E5	13	28172.7	125369
E6	13	141843	141659
E7	13	48791.7	126485
E8	13	35434	126731
E9	13	36604.8	128433
E10	13	38725.9	127916
E11	13	38563.4	129752
E12	13	52831	137673
F1	13	48974.9	142021
F2	13	43214.7	126582
F3	13	34456.4	127257
F4	13	34818	132784
F5	13	30028.5	135936
F6	13	55418.7	134964
F7	13	32712.7	134366
F8	13	33443.6	134765
F9	13	35033.2	128583
F10	13	35198.4	136764
F11	13	31181.4	132119
F12	13	59859.3	155518
G1	13	43825.5	146950
G2	13	50502.5	139236
G3	13	40609.8	133708
G4	13	35907.3	141656
G5	13	33646.9	139115
G6	13	35577.8	141633
G7	13	34239	140486
G8	13	38606.5	145881
G9	13	44185.9	144328
G10	13	58009	142756
G11	13	70589.3	143738
G12	13	47502.6	157732
H1	13	60611.9	159505
H2	13	44964.3	157873
H3	13	41654.6	148389
H4	13	41805.5	147327
H5	13	39595.1	150440
H6	13	45025	154670
H7	13
H8	13
H9	13
H10	13
H11	13
H12	13
A1	14	21918.7	98183.2
A2	14	35644	123752
A3	14	33709.5	118578
A4	14	34976.2	115073
A5	14	34646	124379
A6	14	46588.8	139464
A7	14	38645.5	136644
A8	14	202141	431442
A9	14	44574.6	129838
A10	14	33426.9	132307
A11	14	34200.6	138323
A12	14	41775.9	140668
B1	14	37176.9	123233
B2	14	41719.9	125022
B3	14	32448	110393
B4	14	31797.1	122952
B5	14	33932.4	149509
B6	14	26811.6	128791
B7	14	32416.4	129920
B8	14	117699	424826
B9	14	38021.7	125985
B10	14	42898.4	135246
B11	14	46401.4	144234
B12	14	46034.6	151773
C1	14	41388.4	130066
C2	14	43934.3	154478
C3	14	38330.2	119889
C4	14	32928.5	126433
C5	14	32238.6	128313
C6	14	30600	129229
C7	14	34070.4	131811
C8	14	38077.4	134066
C9	14	47358.3	115050
C10	14	39363.6	138566
C11	14	35671.2	142231
C12	14	46950.6	147780
D1	14	45207.7	134369
D2	14	37502.6	123437
D3	14	43687.5	125821
D4	14	32946.4	125569
D5	14	35006	128849
D6	14	39336.6	130398
D7	14	30812.1	126893
D8	14	30984.6	127078
D9	14	36223	125846
D10	14	52148	131208
D11	14	46458.3	142829
D12	14	136467	150132
E1	14	46270	128131
E2	14	40724.1	115881
E3	14	64019.1	125074
E4	14	33346.4	130382
E5	14	28083.7	125114
E6	14	141942	141567
E7	14	48798.7	126280
E8	14	35485.3	126756
E9	14	36776.7	128588
E10	14	38719.3	127524
E11	14	38246.1	129678
E12	14	52834.7	137636
F1	14	49420.3	141988
F2	14	43369.1	126218
F3	14	34451.1	127470
F4	14	35095.7	132808
F5	14	29731.1	135907
F6	14	55447.5	134507
F7	14	32804.2	134263
F8	14	33348.7	134884
F9	14	35124.1	128394
F10	14	35528.6	136616
F11	14	30746.2	132262
F12	14	59764.3	155326
G1	14	43671.2	147503
G2	14	50601.9	139226
G3	14	40393.1	133598
G4	14	35963.5	141525
G5	14	33739.6	139039
G6	14	35794.1	141611
G7	14	34299.8	140200
G8	14	38780.6	146045
G9	14	44040.6	144149
G10	14	58188.8	142526
G11	14	71280	143897
G12	14	48313.4	157351
H1	14	61168.4	159016
H2	14	44971	158175
H3	14	41740.1	148588
H4	14	42003.8	146895
H5	14	40243.6	150557
H6	14	45071.3	154173
H7	14
H8	14
H9	14
H10	14
H11	14
H12	14
A1	15	21679.6	97197.8
A2	15	35451.3	123410
A3	15	33442.6	118860
A4	15	34703	115027
A5	15	34285.6	124446
A6	15	46715	139597
A7	15	38774	136650
A8	15	202910	433302
A9	15	44440.9	130180
A10	15	33818.2	132810
A11	15	33973.7	138455
A12	15	41446.9	140939
B1	15	37826.2	123109
B2	15	42237.2	125229
B3	15	32662.8	110268
B4	15	31452.3	123141
B5	15	33845	149372
B6	15	26844.9	128486
B7	15	32604.6	130112
B8	15	117427	423397
B9	15	38036.2	126124
B10	15	42826.4	135365
B11	15	46501.4	144337
B12	15	46901.8	151947
C1	15	41141.8	130089
C2	15	44370	154825
C3	15	38124	120137
C4	15	33068	126140
C5	15	32276	128023
C6	15	30528	129480
C7	15	33727.5	131745
C8	15	38137.7	133836
C9	15	47305.9	114832
C10	15	39466.3	138606
C11	15	35826.8	141664
C12	15	46686	147678
D1	15	45833	134354
D2	15	37585.2	123610
D3	15	43861.4	125798
D4	15	33159.4	125298
D5	15	35124.9	129036
D6	15	39107.7	130279
D7	15	31011.6	126749
D8	15	31191.7	127062
D9	15	36289.6	125949
D10	15	52534.4	131372
D11	15	46827.9	143002
D12	15	136876	150335
E1	15	46030.4	128212
E2	15	41090.4	116133
E3	15	64545.3	124851
E4	15	33167.4	130161
E5	15	28503.4	125211
E6	15	142035	141538
E7	15	48846.2	125935
E8	15	35415.7	126298
E9	15	36693.8	128427
E10	15	38401.5	127358
E11	15	38380.7	129774
E12	15	53151	137818
F1	15	49161.4	142250
F2	15	43419.7	126448
F3	15	34346.2	127121
F4	15	35082.6	132476
F5	15	30091.9	135675
F6	15	55577.5	134573
F7	15	32976.5	134022
F8	15	33328.6	134587
F9	15	34971.7	128525
F10	15	35441	136431
F11	15	31150.2	132201
F12	15	60287.3	155511
G1	15	43621.8	147476
G2	15	50496	139341
G3	15	40969.6	133729
G4	15	36251.2	141640
G5	15	34007.4	138993
G6	15	36099	141480
G7	15	34727.3	140378
G8	15	39350.1	145976
G9	15	44167.3	144236
G10	15	58896	142681
G11	15	71909.6	143935
G12	15	48736.5	157611
H1	15	62163.2	158917
H2	15	46573.9	158274
H3	15	43248.3	148121
H4	15	43495.8	147077
H5	15	41433.4	150697
H6	15	45087.9	154464
H7	15
H8	15
H9	15
H10	15
H11	15
H12	15
A1	16	21366.7	97549.9
A2	16	35712.1	123337
A3	16	33579.4	119125
A4	16	35299	114617
A5	16	34386	124237
A6	16	46471	139901
A7	16	38526.6	136386
A8	16	202439	431990
A9	16	44296.3	129913
A10	16	33797.8	132484
A11	16	34087.2	138437
A12	16	41614.1	140572
B1	16	38016.7	123124
B2	16	41802.9	124565
B3	16	32582.7	110391
B4	16	31370.3	123478
B5	16	34067.7	149521
B6	16	27029.6	128724
B7	16	32656.6	130086
B8	16	117186	423620
B9	16	38181.9	125953
B10	16	42963.8	135482
B11	16	46662	144347
B12	16	47051.9	151740
C1	16	41601	130184
C2	16	44887.2	155084
C3	16	38115.8	120169
C4	16	32877.4	126319
C5	16	32376.7	128463
C6	16	30678.3	129298
C7	16	34040.1	131611
C8	16	38241.8	133924
C9	16	47083	114750
C10	16	39391.6	138640
C11	16	35694.8	142019
C12	16	46353.1	147208
D1	16	46015	134875
D2	16	37805.5	123852
D3	16	43963.6	126054
D4	16	33350	125514
D5	16	35177.4	129251
D6	16	39351.7	130352
D7	16	31316.4	127118
D8	16	31467.7	127156
D9	16	35993.9	125847
D10	16	52926.9	131155
D11	16	46914.2	142932
D12	16	137655	150193
E1	16	45960	128239
E2	16	41432.6	115727
E3	16	64395.7	124851
E4	16	33204.1	130355
E5	16	28184.9	125114
E6	16	142271	141676
E7	16	48889.1	126304
E8	16	35460.4	126516
E9	16	36823.3	128583
E10	16	38506.5	127453
E11	16	38279.1	129673
E12	16	53352.4	137743
F1	16	49329.6	142261
F2	16	43999.2	126367
F3	16	34801.6	127315
F4	16	35217.4	132782
F5	16	30285.4	135603
F6	16	55919.2	134750
F7	16	32899.8	134204
F8	16	33257.8	134806
F9	16	35171.4	128338
F10	16	35401.9	136466
F11	16	31136.9	132194
F12	16	60555.4	155453
G1	16	44514.1	147309
G2	16	51710.8	139185
G3	16	41645.5	133550
G4	16	36805.7	142008
G5	16	34530	139213
G6	16	36891.4	141222
G7	16	35401.9	140418
G8	16	39814.8	145806
G9	16	45141	144058
G10	16	59979	142865
G11	16	73291.3	143540
G12	16	50215.9	157487
H1	16	64111.1	159218
H2	16	48771.3	158077
H3	16	45520.9	148468
H4	16	45583	147221
H5	16	44056.7	149972
H6	16	45149.7	154557
H7	16
H8	16
H9	16
H10	16
H11	16
H12	16
A1	17	21596.8	97476.2
A2	17	36253.6	123384
A3	17	33746.9	119039
A4	17	35109.7	115123
A5	17	34526.9	124276
A6	17	46456.2	139687
A7	17	38237.3	136179
A8	17	203474	432774
A9	17	44303	129693
A10	17	33942.2	132129
A11	17	34013.5	138567
A12	17	41555.6	140754
B1	17	37495.9	123973
B2	17	42303.2	124693
B3	17	32414.9	110692
B4	17	31683.5	123775
B5	17	33835.9	149646
B6	17	27107.8	128760
B7	17	32598.5	130190
B8	17	117634	423993
B9	17	38342.9	125975
B10	17	43129.1	135155
B11	17	46622.6	144153
B12	17	47227.8	151592
C1	17	42088	130225
C2	17	44861.1	154418
C3	17	39074.6	119740
C4	17	33096.3	126414
C5	17	32273	128051
C6	17	30886.8	129136
C7	17	33421.2	131729
C8	17	38158.8	133769
C9	17	47201.6	114957
C10	17	39459.2	138577
C11	17	35550.9	142010
C12	17	46872.9	146985
D1	17	46035.2	134443
D2	17	38294.2	123383
D3	17	44232.2	125856
D4	17	33219.3	125562
D5	17	35270.2	128707
D6	17	39417.9	130403
D7	17	31188.2	126895
D8	17	31214.7	126645
D9	17	36351.3	125656
D10	17	53613.9	131187
D11	17	47819.5	142732
D12	17	139158	150424
E1	17	46224.4	128109
E2	17	41185.1	115879
E3	17	64482.1	124827
E4	17	33525.6	130137
E5	17	28600.9	125046
E6	17	141834	141291
E7	17	48713.7	125899
E8	17	35295.8	126211
E9	17	36490	128134
E10	17	38641.5	127468
E11	17	38469.8	129934
E12	17	53523.3	137923
F1	17	50502.8	142423
F2	17	44392.9	126099
F3	17	35327	127419
F4	17	35421.9	132746
F5	17	30387.2	136169
F6	17	55835.6	134933
F7	17	32933.9	134258
F8	17	33194.2	134887
F9	17	34958.8	128518
F10	17	35216.7	136589
F11	17	31347.1	131880
F12	17	60297.8	155322
G1	17	45562.5	147716
G2	17	52861	139387
G3	17	42921.7	133748
G4	17	37937.8	141634
G5	17	35927.3	138881
G6	17	37897.3	141228
G7	17	36599.3	140207
G8	17	41087.3	145840
G9	17	46445.3	144118
G10	17	62459.8	142780
G11	17	75866.3	143627
G12	17	53633	157228
H1	17	69305.6	158638
H2	17	52879.3	158064
H3	17	50181.5	148280
H4	17	49711.9	147422
H5	17	48893.8	150351
H6	17	45326.3	154472
H7	17
H8	17
H9	17
H10	17
H11	17
H12	17
A1	18	21918.7	97081.7
A2	18	36266.5	123471
A3	18	33853.5	118960
A4	18	35499.3	114579
A5	18	34528.2	124103
A6	18	47102.3	139431
A7	18	38474.5	136765
A8	18	202978	433338
A9	18	44552.1	129601
A10	18	34056.3	132164
A11	18	34006.2	138331
A12	18	41769.4	140430
B1	18	38449	123228
B2	18	42869.7	125286
B3	18	33053.7	110686
B4	18	31431	123462
B5	18	34299	149757
B6	18	27150.5	128926
B7	18	32959.6	130258
B8	18	117548	423485
B9	18	38368.2	125688
B10	18	42922.4	135277
B11	18	46481.7	144374
B12	18	47201.8	152069
C1	18	42552.7	130136
C2	18	46022.5	155046
C3	18	39699.4	119886
C4	18	33231.5	126783
C5	18	32686.3	128233
C6	18	30956.7	129079
C7	18	33891.1	131661
C8	18	38384.2	133923
C9	18	47058.4	114709
C10	18	39473	138641
C11	18	36107.9	141954
C12	18	47018.6	147261
D1	18	47386	134533
D2	18	39652.4	123840
D3	18	45507.6	125832
D4	18	33225	125573
D5	18	35411.4	129064
D6	18	39718.2	130157
D7	18	31347.4	127122
D8	18	31315.8	126980
D9	18	35894	126076
D10	18	54966.6	131514
D11	18	49761	142936
D12	18	141059	150378
E1	18	46958.2	128503
E2	18	41830.5	115926
E3	18	65026.9	125167
E4	18	33544.4	129948
E5	18	28663	125037
E6	18	142041	141537
E7	18	48852.6	126120
E8	18	35459.1	126097
E9	18	36492.1	128413
E10	18	38330.6	127462
E11	18	38437.6	129637
E12	18	53884.3	137804
F1	18	51851.2	142261
F2	18	45721.1	126406
F3	18	36448.2	127402
F4	18	35694.9	132812
F5	18	30752.9	135859
F6	18	56338.6	134862
F7	18	32993.6	134372
F8	18	33595.2	134659
F9	18	35265.5	128597
F10	18	35727.4	136497
F11	18	31250.6	132287
F12	18	60618.4	155064
G1	18	47790.5	147287
G2	18	55299.7	139090
G3	18	45226.4	133417
G4	18	40476.2	141831
G5	18	37712.2	138759
G6	18	40430.6	141494
G7	18	38913	140013
G8	18	43655.2	145556
G9	18	48996	144156
G10	18	67050.6	143081
G11	18	80449.9	143779
G12	18	59203.3	157601
H1	18	77609.7	158527
H2	18	62031.4	157716
H3	18	59265.4	148277
H4	18	57091.3	147073
H5	18	57917.7	150256
H6	18	45259.2	154269
H7	18
H8	18
H9	18
H10	18
H11	18
H12	18
A1	19	21757.8	97140.3
A2	19	36499	123241
A3	19	34710.3	119139
A4	19	36134.8	114366
A5	19	35196.7	124396
A6	19	47344	139851
A7	19	38699.6	136613
A8	19	203075	433708
A9	19	44903.3	129700
A10	19	34325.4	132481
A11	19	34464.2	138345
A12	19	42271.7	140529
B1	19	38671.7	123279
B2	19	43650.9	125147
B3	19	33534	110667
B4	19	31501	123445
B5	19	34004.9	149930
B6	19	27428.7	128992
B7	19	32976.5	130128
B8	19	117470	423594
B9	19	38448.7	125957
B10	19	43244.8	135243
B11	19	46903.9	144576
B12	19	46923.2	151912
C1	19	43810.1	130180
C2	19	47270.5	154930
C3	19	40590.8	120291
C4	19	33465.5	126586
C5	19	32874.6	128330
C6	19	31322.8	129125
C7	19	33751.7	131626
C8	19	37922.5	133818
C9	19	47132.7	114930
C10	19	39663.6	138738
C11	19	35817.1	142012
C12	19	47072.9	147192
D1	19	49756.2	134721
D2	19	41750.7	123569
D3	19	47602.5	126054
D4	19	34072.7	125392
D5	19	35692.8	129045
D6	19	39948.9	130306
D7	19	31247.6	126836
D8	19	31495.4	126951
D9	19	36121.8	125457
D10	19	58069.9	131468
D11	19	52611.2	142580
D12	19	144409	150271
E1	19	46971.9	127945
E2	19	42256.9	115850
E3	19	65445.2	124938
E4	19	33340.3	130147
E5	19	28697.4	124959
E6	19	142408	141433
E7	19	48921.8	126079
E8	19	35343.2	126330
E9	19	36602.7	128559
E10	19	38883.3	127633
E11	19	38637.8	129871
E12	19	54009.6	138151
F1	19	54437.1	142465
F2	19	47921.5	126595
F3	19	38709.9	127488
F4	19	36508.2	132884
F5	19	31402.6	136095
F6	19	57243.5	134526
F7	19	33639.3	134407
F8	19	33419.3	134638
F9	19	35317.7	128563
F10	19	36092.8	136808
F11	19	31679.7	132201
F12	19	60679.8	155131
G1	19	52243.5	147276
G2	19	59616.1	139179
G3	19	49909.5	133733
G4	19	44738.2	141940
G5	19	41921.4	139071
G6	19	45043.1	141586
G7	19	43583.5	140333
G8	19	48141.5	146153
G9	19	53865.8	144246
G10	19	75515.8	142714
G11	19	89514.7	143993
G12	19	69590.8	157467
H1	19	93907	158825
H2	19	76997.5	158138
H3	19	75749.1	148141
H4	19	71315	147136
H5	19	74477.1	150482
H6	19	45195.4	154420
H7	19
H8	19
H9	19
H10	19
H11	19
H12	19
A1	20	22403.9	97199
A2	20	37286.9	123544
A3	20	35065.4	119205
A4	20	36404.9	115074
A5	20	35889.1	124242
A6	20	48334.2	139403
A7	20	39045.2	136515
A8	20	203878	433238
A9	20	44792.8	129751
A10	20	34900.3	132643
A11	20	34608.3	138471
A12	20	42392.9	140319
B1	20	40681.3	123325
B2	20	45281.2	124761
B3	20	34960.2	110498
B4	20	31900.3	123284
B5	20	34664.8	149634
B6	20	27737.8	128596
B7	20	32793.4	130158
B8	20	118485	424176
B9	20	38282.6	125716
B10	20	43206.3	135401
B11	20	46959.7	144387
B12	20	47255.5	152001
C1	20	45993.9	130158
C2	20	49672.3	154882
C3	20	42615.3	120035
C4	20	34238.1	126482
C5	20	33354.1	127856
C6	20	31962.3	129065
C7	20	33891.2	131738
C8	20	38197.9	133801
C9	20	46857.9	114496
C10	20	39436.6	138891
C11	20	36207.7	142159
C12	20	47177.6	147189
D1	20	53816.2	134651
D2	20	45406.9	123353
D3	20	50757.1	125958
D4	20	34373.2	125470
D5	20	36437.5	128813
D6	20	40593.9	130309
D7	20	31746.6	126714
D8	20	31788.7	126687
D9	20	36374.9	125614
D10	20	63509.7	131056
D11	20	58811.1	142859
D12	20	150958	150265
E1	20	48127.2	128206
E2	20	42667.2	115910
E3	20	66121.3	124833
E4	20	33962.9	129616
E5	20	29010.4	124801
E6	20	142211	141331
E7	20	48854	125931
E8	20	35511	126311
E9	20	36801.8	128010
E10	20	38725.9	127386
E11	20	38738.9	129535
E12	20	54267.9	137663
F1	20	59901.2	142285
F2	20	52260	126262
F3	20	43755	127458
F4	20	38298	132798
F5	20	33544.1	135632
F6	20	59132.7	134766
F7	20	33930	134024
F8	20	33870.9	134618
F9	20	35456.6	128451
F10	20	36632.3	136406
F11	20	32137.7	132214
F12	20	61595	155225
G1	20	59692.5	147455
G2	20	68345.1	139866
G3	20	59030.7	133641
G4	20	53273.4	141757
G5	20	50055	138793
G6	20	53577.5	141289
G7	20	52391.8	140291
G8	20	56805.5	145797
G9	20	63350	143914
G10	20	91584.2	142650
G11	20	105238	143823
G12	20	89610.3	157470
H1	20	122227	158485
H2	20	104955	158140
H3	20	103644	148106
H4	20	96279.4	147229
H5	20	103530	150450
H6	20	45271	154212
H7	20
H8	20
H9	20
H10	20
H11	20
H12	20
A1	21	23036.8	97158.4
A2	21	39523.8	123428
A3	21	36483.5	119140
A4	21	38102.7	114733
A5	21	37539.5	124131
A6	21	49752.1	139805
A7	21	39623.6	136453
A8	21	207302	432616
A9	21	44908.2	129745
A10	21	35014.4	132280
A11	21	35733	138181
A12	21	43314.8	140520
B1	21	43586	123135
B2	21	48298.8	124853
B3	21	36823.2	110753
B4	21	32434.2	123228
B5	21	36103.8	149471
B6	21	28786.3	128510
B7	21	33059.9	129903
B8	21	118704	424341
B9	21	38673.4	125384
B10	21	43421.6	135672
B11	21	46759.8	144180
B12	21	47619.2	151439
C1	21	50650.5	130581
C2	21	54541.3	154575
C3	21	47297.7	119946
C4	21	35099.3	126504
C5	21	34567.4	127913
C6	21	33014.5	129150
C7	21	34154.7	131753
C8	21	38430.7	134003
C9	21	47359.4	114449
C10	21	39921.6	138909
C11	21	36356.5	141998
C12	21	47293.7	147187
D1	21	62396	134924
D2	21	52889.6	123676
D3	21	57555	125845
D4	21	35578.4	125680
D5	21	37767	128921
D6	21	41815.7	130276
D7	21	32238.3	126756
D8	21	32133.6	126988
D9	21	37338	125426
D10	21	74623.9	131273
D11	21	70605.2	142819
D12	21	163609	150122
E1	21	50755.7	128140
E2	21	44737.4	115967
E3	21	67791.5	125169
E4	21	34856.8	130158
E5	21	30074.2	125166
E6	21	143257	141772
E7	21	48813.5	126144
E8	21	35552.1	126448
E9	21	36878.6	128315
E10	21	39359.6	127003
E11	21	38856.2	129610
E12	21	54529.3	137820
F1	21	69099.7	142238
F2	21	60586.8	126169
F3	21	52280.6	127355
F4	21	41909.8	132729
F5	21	37027.7	135572
F6	21	62131.1	134685
F7	21	35244.6	134154
F8	21	34709.5	134716
F9	21	35810.6	128514
F10	21	37723.5	136560
F11	21	33527.8	132082
F12	21	62759.8	155358
G1	21	74746.6	147488
[truncated: 10,487 more rows]

## Sheet: Amplification Data
Block Type	96alum
Chemistry	SYBR_GREEN
Experiment File Name	D:\ShuJu\LZM\16+actin + plc 1-3 zuzhi.eds
Experiment Run End Time	2023-07-14 11:23:36 AM CST
Instrument Type	sds7500
Passive Reference	ROX
Well	Cycle	Target Name	Rn	ΔRn
A1	1	plc1	0.218201	0.00143219
A1	2	plc1	0.215624	-0.00160107
A1	3	plc1	0.21917	0.00148719
A1	4	plc1	0.218469	0.000329346
A1	5	plc1	0.216838	-0.00175903
A1	6	plc1	0.219679	0.000625541
A1	7	plc1	0.218145	-0.0013661
A1	8	plc1	0.222651	0.00268279
A1	9	plc1	0.219531	-0.000894042
A1	10	plc1	0.219811	-0.00107054
A1	11	plc1	0.223391	0.00205243
A1	12	plc1	0.222966	0.00116989
A1	13	plc1	0.220427	-0.00182559
A1	14	plc1	0.223243	0.000533009
A1	15	plc1	0.223046	-0.000120688
A1	16	plc1	0.219034	-0.00459059
A1	17	plc1	0.22156	-0.00252178
A1	18	plc1	0.225776	0.00123778
A1	19	plc1	0.223983	-0.00101245
A1	20	plc1	0.230495	0.00504284
A1	21	plc1	0.237106	0.0111964
A1	22	plc1	0.258224	0.0318576
A1	23	plc1	0.2831	0.0562768
A1	24	plc1	0.349454	0.122174
A1	25	plc1	0.451984	0.224246
A1	26	plc1	0.633254	0.405059
A1	27	plc1	0.879257	0.650605
A1	28	plc1	1.13677	0.907661
A1	29	plc1	1.31313	1.08356
A1	30	plc1	1.42542	1.1954
A1	31	plc1	1.54179	1.31131
A1	32	plc1	1.63626	1.40532
A1	33	plc1	1.71681	1.48541
A1	34	plc1	1.76793	1.53608
A1	35	plc1	1.80909	1.57678
A1	36	plc1	1.86454	1.63178
A1	37	plc1	1.89521	1.66199
A1	38	plc1	1.91577	1.68209
A1	39	plc1	1.93506	1.70092
A1	40	plc1	1.96231	1.72772
A2	1	plc1	0.281925	-0.00312622
A2	2	plc1	0.286106	0.000629368
A2	3	plc1	0.287899	0.00199758
A2	4	plc1	0.286989	0.000662659
A2	5	plc1	0.28727	0.000518134
A2	6	plc1	0.287302	0.000125653
A2	7	plc1	0.288756	0.00115442
A2	8	plc1	0.287382	-0.000644527
A2	9	plc1	0.284204	-0.00424833
A2	10	plc1	0.290269	0.00139246
A2	11	plc1	0.286984	-0.00231842
A2	12	plc1	0.292731	0.00300415
A2	13	plc1	0.289796	-0.000356139
A2	14	plc1	0.288027	-0.00255014
A2	15	plc1	0.287264	-0.00373813
A2	16	plc1	0.289548	-0.00187944
A2	17	plc1	0.293826	0.00197417
A2	18	plc1	0.293725	0.00144776
A2	19	plc1	0.296161	0.00345815
A2	20	plc1	0.30181	0.00868284
A2	21	plc1	0.320217	0.0266648
A2	22	plc1	0.340357	0.0463792
A2	23	plc1	0.379543	0.0851406
A2	24	plc1	0.461037	0.16621
A2	25	plc1	0.6071	0.311847
A2	26	plc1	0.840197	0.54452
A2	27	plc1	1.18111	0.885003
A2	28	plc1	1.49956	1.20303
A2	29	plc1	1.70449	1.40754
A2	30	plc1	1.86758	1.5702
A2	31	plc1	2.01012	1.71232
A2	32	plc1	2.13505	1.83682
A2	33	plc1	2.22089	1.92224
A2	34	plc1	2.29444	1.99536
A2	35	plc1	2.35659	2.05709
A2	36	plc1	2.41123	2.1113
A2	37	plc1	2.4579	2.15755
A2	38	plc1	2.48149	2.18072
A2	39	plc1	2.51649	2.21529
A2	40	plc1	2.54295	2.24133
A3	1	plc1	0.271489	-0.0036702
A3	2	plc1	0.273427	-0.00237449
A3	3	plc1	0.275974	-0.000469935
A3	4	plc1	0.278667	0.00158056
A3	5	plc1	0.277188	-0.000540978
A3	6	plc1	0.280682	0.00231072
A3	7	plc1	0.274802	-0.0042116
A3	8	plc1	0.279484	-0.00017145
A3	9	plc1	0.278936	-0.00136226
A3	10	plc1	0.28319	0.00224871
A3	11	plc1	0.282426	0.000842405
A3	12	plc1	0.28289	0.000664071
A3	13	plc1	0.285736	0.00286796
A3	14	plc1	0.284281	0.00077071
A3	15	plc1	0.28136	-0.00279317
A3	16	plc1	0.281884	-0.00291103
A3	17	plc1	0.283494	-0.00194418
A3	18	plc1	0.28458	-0.00150057
A3	19	plc1	0.291343	0.00462005
A3	20	plc1	0.29416	0.00679452
A3	21	plc1	0.306225	0.0182169
A3	22	plc1	0.334257	0.0456064
A3	23	plc1	0.378991	0.0896986
A3	24	plc1	0.471498	0.181563
A3	25	plc1	0.627229	0.336652
A3	26	plc1	0.877301	0.586081
A3	27	plc1	1.22381	0.931948
A3	28	plc1	1.54303	1.25053
A3	29	plc1	1.75063	1.45748
A3	30	plc1	1.90044	1.60665
A3	31	plc1	2.04663	1.75219
A3	32	plc1	2.15631	1.86123
A3	33	plc1	2.24872	1.953
A3	34	plc1	2.31745	2.02109
A3	35	plc1	2.37845	2.08145
A3	36	plc1	2.42973	2.13208
A3	37	plc1	2.46734	2.16905
A3	38	plc1	2.4841	2.18517
A3	39	plc1	2.51849	2.21891
A3	40	plc1	2.54035	2.24013
A4	1	plc2	0.290031	-0.0023934
A4	2	plc2	0.289636	-0.00376649
A4	3	plc2	0.295464	0.00108422
A4	4	plc2	0.295549	0.000191786
A4	5	plc2	0.296569	0.000234667
A4	6	plc2	0.295885	-0.0014267
A4	7	plc2	0.298513	0.00022363
A4	8	plc2	0.301225	0.00195848
A4	9	plc2	0.301963	0.00171928
A4	10	plc2	0.299766	-0.00145551
A4	11	plc2	0.304217	0.00201798
A4	12	plc2	0.300893	-0.00228369
A4	13	plc2	0.302963	-0.00119067
A4	14	plc2	0.303948	-0.00118313
A4	15	plc2	0.301695	-0.00441398
A4	16	plc2	0.307975	0.000888807
A4	17	plc2	0.304976	-0.00308781
A4	18	plc2	0.309825	0.000784102
A4	19	plc2	0.315957	0.00593853
A4	20	plc2	0.316362	0.00536575
A4	21	plc2	0.332099	0.0201253
A4	22	plc2	0.356285	0.0433347
A4	23	plc2	0.407187	0.0932587
A4	24	plc2	0.498544	0.183639
A4	25	plc2	0.655701	0.339818
A4	26	plc2	0.90953	0.59267
A4	27	plc2	1.26446	0.946619
A4	28	plc2	1.59956	1.28074
A4	29	plc2	1.87083	1.55104
A4	30	plc2	2.03604	1.71527
A4	31	plc2	2.16352	1.84177
A4	32	plc2	2.26488	1.94215
A4	33	plc2	2.33669	2.01298
A4	34	plc2	2.40554	2.08086
A4	35	plc2	2.43885	2.11319
A4	36	plc2	2.48596	2.15933
A4	37	plc2	2.5156	2.18799
A4	38	plc2	2.54552	2.21693
A4	39	plc2	2.54428	2.21471
A4	40	plc2	2.56992	2.23938
A5	1	plc2	0.267726	-0.00477233
A5	2	plc2	0.269707	-0.00316369
A5	3	plc2	0.271818	-0.00142597
A5	4	plc2	0.273204	-0.000412094
A5	5	plc2	0.275527	0.00153862
A5	6	plc2	0.274711	0.000349481
A5	7	plc2	0.275192	0.000458262
A5	8	plc2	0.277164	0.00205773
A5	9	plc2	0.276931	0.00145241
A5	10	plc2	0.274189	-0.00166267
A5	11	plc2	0.276514	0.000290427
A5	12	plc2	0.275072	-0.00152477
A5	13	plc2	0.275663	-0.00130605
A5	14	plc2	0.27855	0.001209
A5	15	plc2	0.275506	-0.00220831
A5	16	plc2	0.276778	-0.00130899
A5	17	plc2	0.277824	-0.000635156
A5	18	plc2	0.278222	-0.000609463
A5	19	plc2	0.282942	0.00373754
A5	20	plc2	0.288864	0.0092873
A5	21	plc2	0.302418	0.0224685
A5	22	plc2	0.324431	0.044109
A5	23	plc2	0.375102	0.0944074
A5	24	plc2	0.458136	0.17707
A5	25	plc2	0.614264	0.332825
A5	26	plc2	0.86423	0.582418
A5	27	plc2	1.20685	0.924663
A5	28	plc2	1.56512	1.28256
A5	29	plc2	1.83334	1.55041
A5	30	plc2	2.01497	1.73167
A5	31	plc2	2.14602	1.86234
A5	32	plc2	2.2522	1.96815
A5	33	plc2	2.33026	2.04584
A5	34	plc2	2.40063	2.11584
A5	35	plc2	2.44824	2.16308
A5	36	plc2	2.4925	2.20697
A5	37	plc2	2.518	2.23209
A5	38	plc2	2.53671	2.25042
A5	39	plc2	2.55456	2.2679
A5	40	plc2	2.57045	2.28343
A6	1	plc2	0.318307	-0.00754732
A6	2	plc2	0.32219	-0.00439214
A6	3	plc2	0.3254	-0.00190968
A6	4	plc2	0.32642	-0.00161725
A6	5	plc2	0.327639	-0.00112523
A6	6	plc2	0.329877	0.000385227
A6	7	plc2	0.331059	0.000840024
A6	8	plc2	0.334285	0.00333798
A6	9	plc2	0.335163	0.00348849
A6	10	plc2	0.336719	0.00431755
A6	11	plc2	0.333719	0.000590066
A6	12	plc2	0.331294	-0.00256247
A6	13	plc2	0.334781	0.000196285
A6	14	plc2	0.334056	-0.00125579
A6	15	plc2	0.334642	-0.00139725
A6	16	plc2	0.332172	-0.00459496
A6	17	plc2	0.332574	-0.00491989
A6	18	plc2	0.337819	-0.00040333
A6	19	plc2	0.338532	-0.000416847
A6	20	plc2	0.346724	0.00704707
A6	21	plc2	0.355868	0.0154635
A6	22	plc2	0.381875	0.0407432
A6	23	plc2	0.430001	0.0881416
A6	24	plc2	0.509837	0.16725
A6	25	plc2	0.660697	0.317382
A6	26	plc2	0.898195	0.554153
A6	27	plc2	1.21809	0.873324
A6	28	plc2	1.52735	1.18185
A6	29	plc2	1.76968	1.42346
A6	30	plc2	1.93406	1.58711
A6	31	plc2	2.05791	1.71023
A6	32	plc2	2.14729	1.79888
A6	33	plc2	2.21996	1.87083
A6	34	plc2	2.29033	1.94047
A6	35	plc2	2.32829	1.9777
A6	36	plc2	2.35668	2.00537
A6	37	plc2	2.38299	2.03095
A6	38	plc2	2.40475	2.05198
A6	39	plc2	2.42609	2.07259
A6	40	plc2	2.43906	2.08484
A7	1	plc3	0.271967	-0.00622553
A7	2	plc3	0.275508	-0.00303118
A7	3	plc3	0.278261	-0.000625543
A7	4	plc3	0.281004	0.00177017
A7	5	plc3	0.27863	-0.000950764
A7	6	plc3	0.281424	0.0014968
A7	7	plc3	0.280656	0.000381204
A7	8	plc3	0.280404	-0.000217325
A7	9	plc3	0.281335	0.000366345
A7	10	plc3	0.280668	-0.00064736
A7	11	plc3	0.282746	0.00108298
A7	12	plc3	0.283282	0.00127258
A7	13	plc3	0.278942	-0.0034151
A7	14	plc3	0.282819	0.000115456
A7	15	plc3	0.283747	0.000696413
A7	16	plc3	0.282483	-0.000914649
A7	17	plc3	0.280788	-0.00295689
A7	18	plc3	0.281319	-0.00277266
A7	19	plc3	0.28328	-0.00115902
A7	20	plc3	0.286014	0.00122819
A7	21	plc3	0.290382	0.00524917
A7	22	plc3	0.2977	0.0122206
A7	23	plc3	0.308654	0.0228275
A7	24	plc3	0.335504	0.0493301
A7	25	plc3	0.38385	0.0973295
A7	26	plc3	0.477014	0.190146
A7	27	plc3	0.636596	0.349381
A7	28	plc3	0.874636	0.587074
A7	29	plc3	1.1579	0.869993
A7	30	plc3	1.33801	1.04976
A7	31	plc3	1.46606	1.17746
A7	32	plc3	1.61024	1.32129
A7	33	plc3	1.74589	1.4566
A7	34	plc3	1.87598	1.58633
A7	35	plc3	1.976	1.686
A7	36	plc3	2.0582	1.76786
A7	37	plc3	2.12381	1.83312
A7	38	plc3	2.18035	1.88932
A7	39	plc3	2.23321	1.94183
A7	40	plc3	2.27234	1.98062
A8	1	plc3	0.437059	-0.0154214
A8	2	plc3	0.445973	-0.0076229
A8	3	plc3	0.450879	-0.00383292
A8	4	plc3	0.450211	-0.0056167
A8	5	plc3	0.457287	0.000343839
A8	6	plc3	0.460392	0.00233313
A8	7	plc3	0.461279	0.00210494
A8	8	plc3	0.462267	0.00197731
A8	9	plc3	0.464134	0.00272852
A8	10	plc3	0.465082	0.00256135
A8	11	plc3	0.463588	-4.83698e-05
A8	12	plc3	0.465337	0.000584794
A8	13	plc3	0.467831	0.00196316
A8	14	plc3	0.468523	0.00153998
A8	15	plc3	0.468288	0.00018876
A8	16	plc3	0.468619	-0.000595117
A8	17	plc3	0.470163	-0.000167113
A8	18	plc3	0.468407	-0.0030387
A8	19	plc3	0.468228	-0.00433277
A8	20	plc3	0.470592	-0.00308481
A8	21	plc3	0.479183	0.0043907
A8	22	plc3	0.485639	0.00973111
A8	23	plc3	0.496596	0.0195722
A8	24	plc3	0.525649	0.0475096
A8	25	plc3	0.576155	0.0969008
A8	26	plc3	0.667815	0.187444
A8	27	plc3	0.829163	0.347677
A8	28	plc3	1.0773	0.594703
A8	29	plc3	1.36017	0.87645
A8	30	plc3	1.53912	1.05428
A8	31	plc3	1.66909	1.18315
A8	32	plc3	1.81513	1.32807
A8	33	plc3	1.94456	1.45638
A8	34	plc3	2.06419	1.57489
A8	35	plc3	2.16831	1.6779
A8	36	plc3	2.23715	1.74563
A8	37	plc3	2.30725	1.81461
A8	38	plc3	2.35748	1.86372
A8	39	plc3	2.40316	1.90829
A8	40	plc3	2.44972	1.95373
A9	1	plc3	0.319855	-0.0077664
A9	2	plc3	0.318984	-0.00962289
A9	3	plc3	0.327243	-0.0023489
A9	4	plc3	0.328261	-0.00231687
A9	5	plc3	0.330607	-0.000955835
A9	6	plc3	0.33271	0.000161266
A9	7	plc3	0.333731	0.000197377
A9	8	plc3	0.336245	0.00172584
A9	9	plc3	0.338041	0.00253672
A9	10	plc3	0.339168	0.00267753
A9	11	plc3	0.336387	-0.00108878
A9	12	plc3	0.339408	0.000947425
A9	13	plc3	0.34038	0.000933796
A9	14	plc3	0.343309	0.00287711
A9	15	plc3	0.341381	-3.66159e-05
A9	16	plc3	0.340969	-0.00143355
A9	17	plc3	0.341599	-0.00178952
A9	18	plc3	0.343763	-0.00061016
A9	19	plc3	0.346208	0.00084934
A9	20	plc3	0.345221	-0.00112329
A9	21	plc3	0.346127	-0.0012029
A9	22	plc3	0.355035	0.00671983
A9	23	plc3	0.366638	0.0173374
A9	24	plc3	0.391522	0.0412362
A9	25	plc3	0.435871	0.0845995
A9	26	plc3	0.518288	0.166031
A9	27	plc3	0.66515	0.311907
A9	28	plc3	0.890123	0.535895
A9	29	plc3	1.17687	0.821655
A9	30	plc3	1.37997	1.02378
A9	31	plc3	1.49875	1.14157
A9	32	plc3	1.63692	1.27875
A9	33	plc3	1.77012	1.41097
A9	34	plc3	1.88982	1.52968
A9	35	plc3	1.98818	1.62706
A9	36	plc3	2.07508	1.71297
A9	37	plc3	2.14815	1.78505
A9	38	plc3	2.18643	1.82235
A9	39	plc3	2.22971	1.86464
A9	40	plc3	2.28312	1.91707
A10	1	spx16	0.241391	-0.00530044
A10	2	spx16	0.244962	-0.00244477
A10	3	spx16	0.247483	-0.000639444
A10	4	spx16	0.249933	0.00109502
A10	5	spx16	0.247118	-0.00243576
A10	6	spx16	0.249528	-0.000741362
A10	7	spx16	0.255355	0.00437013
A10	8	spx16	0.253251	0.00155062
A10	9	spx16	0.253158	0.000742233
A10	10	spx16	0.253805	0.000673809
A10	11	spx16	0.255307	0.00146026
A10	12	spx16	0.25511	0.000547778
A10	13	spx16	0.252764	-0.00251405
A10	14	spx16	0.252647	-0.0033464
A10	15	spx16	0.254635	-0.00207363
A10	16	spx16	0.255109	-0.00231562
A10	17	spx16	0.256887	-0.00125248
A10	18	spx16	0.257683	-0.00117273
A10	19	spx16	0.259097	-0.000473742
A10	20	spx16	0.263115	0.00282871
A10	21	spx16	0.264699	0.00369665
A10	22	spx16	0.272134	0.0104164
A10	23	spx16	0.29051	0.028077
A10	24	spx16	0.323952	0.060803
A10	25	spx16	0.386871	0.123007
A10	26	spx16	0.502329	0.237749
A10	27	spx16	0.698368	0.433072
A10	28	spx16	0.962041	0.69603
A10	29	spx16	1.28018	1.01346
A10	30	spx16	1.53171	1.26427
A10	31	spx16	1.71853	1.45037
A10	32	spx16	1.85031	1.58144
A10	33	spx16	1.96925	1.69966
A10	34	spx16	2.06154	1.79124
A10	35	spx16	2.14482	1.8738
A10	36	spx16	2.21214	1.94041
A10	37	spx16	2.26522	1.99277
A10	38	spx16	2.30486	2.0317
A10	39	spx16	2.33809	2.06421
A10	40	spx16	2.36328	2.08868
A11	1	spx16	0.241722	-0.00272532
A11	2	spx16	0.239672	-0.0049321
A11	3	spx16	0.245841	0.00107949
A11	4	spx16	0.24587	0.000951035
A11	5	spx16	0.244683	-0.000392864
A11	6	spx16	0.245447	0.000214916
A11	7	spx16	0.245858	0.000468868
A11	8	spx16	0.244612	-0.000934443
A11	9	spx16	0.245948	0.000244588
A11	10	spx16	0.246112	0.000251747
A11	11	spx16	0.243356	-0.0026616
A11	12	spx16	0.246608	0.000434209
A11	13	spx16	0.246182	-0.000149106
A11	14	spx16	0.247252	0.000764431
A11	15	spx16	0.245377	-0.00126754
A11	16	spx16	0.246228	-0.000573606
A11	17	spx16	0.245465	-0.00149361
A11	18	spx16	0.245832	-0.00128387
A11	19	spx16	0.249118	0.00184496
A11	20	spx16	0.249932	0.00250241
A11	21	spx16	0.258595	0.0110081
A11	22	spx16	0.269258	0.0215143
A11	23	spx16	0.293236	0.045335
A11	24	spx16	0.331898	0.0838402
A11	25	spx16	0.405685	0.157471
A11	26	spx16	0.545937	0.297566
A11	27	spx16	0.777571	0.529043
A11	28	spx16	1.08744	0.838755
A11	29	spx16	1.42277	1.17393
A11	30	spx16	1.69763	1.44863
A11	31	spx16	1.87679	1.62764
A11	32	spx16	2.01929	1.76998
A11	33	spx16	2.13247	1.883
A11	34	spx16	2.2345	1.98488
A11	35	spx16	2.30427	2.05448
A11	36	spx16	2.37325	2.12331
A11	37	spx16	2.42948	2.17938
A11	38	spx16	2.46086	2.21061
A11	39	spx16	2.49511	2.24469
A11	40	spx16	2.51957	2.269
A12	1	spx16	0.283701	-0.00397622
A12	2	spx16	0.287017	-0.00135229
A12	3	spx16	0.289317	0.000255359
A12	4	spx16	0.290843	0.00108925
A12	5	spx16	0.290794	0.0003474
A12	6	spx16	0.29099	-0.000148758
A12	7	spx16	0.292981	0.00115061
A12	8	spx16	0.292156	-0.000366869
A12	9	spx16	0.295417	0.00220184
A12	10	spx16	0.293982	7.45146e-05
A12	11	spx16	0.295343	0.00074315
A12	12	spx16	0.295994	0.000702372
A12	13	spx16	0.291786	-0.00419765
A12	14	spx16	0.296983	0.000306668
A12	15	spx16	0.294078	-0.00329036
A12	16	spx16	0.296033	-0.00202723
A12	17	spx16	0.295235	-0.00351759
A12	18	spx16	0.29744	-0.0020054
A12	19	spx16	0.300805	0.000667708
A12	20	spx16	0.302119	0.00128932
A12	21	spx16	0.308247	0.00672567
A12	22	spx16	0.313106	0.0108923
A12	23	spx16	0.335635	0.0327292
A12	24	spx16	0.371939	0.0683406
A12	25	spx16	0.439038	0.134748
A12	26	spx16	0.552197	0.247215
A12	27	spx16	0.755716	0.450041
A12	28	spx16	1.02133	0.714962
A12	29	spx16	1.31617	1.00911
A12	30	spx16	1.56451	1.25676
A12	31	spx16	1.74153	1.43308
A12	32	spx16	1.88084	1.57171
A12	33	spx16	1.99578	1.68595
A12	34	spx16	2.1039	1.79338
A12	35	spx16	2.18858	1.87737
A12	36	spx16	2.2615	1.94959
A12	37	spx16	2.30569	1.99309
A12	38	spx16	2.35537	2.04208
A12	39	spx16	2.39862	2.08464
A12	40	spx16	2.43001	2.11534
B1	1	plc1	0.301973	0.00159266
B1	2	plc1	0.299568	-0.00120994
B1	3	plc1	0.299169	-0.00200647
B1	4	plc1	0.305063	0.00349049
B1	5	plc1	0.303297	0.00132604
B1	6	plc1	0.301901	-0.000467284
B1	7	plc1	0.299812	-0.00295381
B1	8	plc1	0.301533	-0.00163073
B1	9	plc1	0.305405	0.00184351
B1	10	plc1	0.30749	0.00353119
B1	11	plc1	0.305459	0.0011021
B1	12	plc1	0.305004	0.000250232
B1	13	plc1	0.300218	-0.00493361
B1	14	plc1	0.30168	-0.00386963
B1	15	plc1	0.307258	0.001311
B1	16	plc1	0.308767	0.00242248
B1	17	plc1	0.302452	-0.00429031
B1	18	plc1	0.312015	0.0048748
B1	19	plc1	0.313693	0.00615559
B1	20	plc1	0.32987	0.0219344
B1	21	plc1	0.353969	0.0456361
B1	22	plc1	0.401502	0.0927712
B1	23	plc1	0.484714	0.175585
B1	24	plc1	0.643332	0.333806
B1	25	plc1	0.896595	0.586672
B1	26	plc1	1.22454	0.914215
B1	27	plc1	1.55861	1.24789
B1	28	plc1	1.73976	1.42864
B1	29	plc1	1.89395	1.58244
B1	30	plc1	2.03597	1.72405
B1	31	plc1	2.14717	1.83486
B1	32	plc1	2.23166	1.91896
B1	33	plc1	2.29975	1.98664
B1	34	plc1	2.35658	2.04307
B1	35	plc1	2.40328	2.08938
B1	36	plc1	2.43957	2.12527
B1	37	plc1	2.46694	2.15225
B1	38	plc1	2.49578	2.18069
B1	39	plc1	2.52714	2.21164
B1	40	plc1	2.54487	2.22898
B2	1	plc1	0.320951	-0.00801603
B2	2	plc1	0.324816	-0.0047778
B2	3	plc1	0.331887	0.00166604
B2	4	plc1	0.328238	-0.00261002
B2	5	plc1	0.329967	-0.00150781
B2	6	plc1	0.333794	0.00169264
B2	7	plc1	0.331361	-0.00136728
B2	8	plc1	0.336796	0.0034411
B2	9	plc1	0.333802	-0.000180237
B2	10	plc1	0.333711	-0.00089805
B2	11	plc1	0.33677	0.0015343
B2	12	plc1	0.335361	-0.000502083
B2	13	plc1	0.339069	0.00257966
B2	14	plc1	0.333701	-0.00341537
B2	15	plc1	0.337279	-0.000464096
B2	16	plc1	0.335592	-0.00277863
B2	17	plc1	0.339258	0.000260232
B2	18	plc1	0.342174	0.00254959
B2	19	plc1	0.348797	0.00854607
B2	20	plc1	0.362944	0.0220658
B2	21	plc1	0.386847	0.0453423
B2	22	plc1	0.430284	0.0881518
B2	23	plc1	0.512935	0.170176
B2	24	plc1	0.668219	0.324834
B2	25	plc1	0.916724	0.572712
B2	26	plc1	1.26538	0.920745
B2	27	plc1	1.60528	1.26001
B2	28	plc1	1.81042	1.46453
B2	29	plc1	1.96841	1.62189
B2	30	plc1	2.12423	1.77708
B2	31	plc1	2.23833	1.89056
B2	32	plc1	2.33217	1.98377
B2	33	plc1	2.3955	2.04648
B2	34	plc1	2.45695	2.10729
B2	35	plc1	2.50594	2.15566
B2	36	plc1	2.54821	2.1973
B2	37	plc1	2.57819	2.22666
B2	38	plc1	2.6132	2.26103
B2	39	plc1	2.62185	2.26906
B2	40	plc1	2.65925	2.30584
B3	1	plc1	0.290944	-0.00316456
B3	2	plc1	0.294984	0.000812674
B3	3	plc1	0.294774	0.000539438
B3	4	plc1	0.294613	0.000315823
B3	5	plc1	0.296722	0.00236204
B3	6	plc1	0.291848	-0.00257484
B3	7	plc1	0.290764	-0.00372182
B3	8	plc1	0.298764	0.00421632
B3	9	plc1	0.293957	-0.000654077
B3	10	plc1	0.298378	0.00370471
B3	11	plc1	0.291857	-0.00287899
B3	12	plc1	0.294128	-0.000671239
B3	13	plc1	0.29271	-0.00215195
B3	14	plc1	0.293933	-0.000992019
B3	15	plc1	0.296212	0.001225
B3	16	plc1	0.295156	0.000106209
B3	17	plc1	0.292838	-0.00227492
B3	18	plc1	0.298626	0.00345031
B3	19	plc1	0.303017	0.00777897
B3	20	plc1	0.316388	0.0210865
B3	21	plc1	0.332481	0.0371177
B3	22	plc1	0.37629	0.0808631
B3	23	plc1	0.4544	0.158911
B3	24	plc1	0.592064	0.296512
B3	25	plc1	0.824271	0.528657
B3	26	plc1	1.15006	0.85438
B3	27	plc1	1.50381	1.20807
B3	28	plc1	1.72796	1.43216
B3	29	plc1	1.89138	1.59552
B3	30	plc1	2.03359	1.73767
B3	31	plc1	2.17604	1.88005
B3	32	plc1	2.26254	1.96649
B3	33	plc1	2.33416	2.03805
B3	34	plc1	2.39525	2.09907
B3	35	plc1	2.44352	2.14727
B3	36	plc1	2.47806	2.18175
B3	37	plc1	2.51042	2.21405
B3	38	plc1	2.536	2.23957
B3	39	plc1	2.56453	2.26804
B3	40	plc1	2.58828	2.29172
B4	1	plc2	0.247721	-0.00674235
B4	2	plc2	0.254538	7.01153e-06
B4	3	plc2	0.254716	0.000117551
B4	4	plc2	0.25601	0.0013441
B4	5	plc2	0.255675	0.000941352
B4	6	plc2	0.254992	0.000191081
B4	7	plc2	0.254149	-0.000719705
B4	8	plc2	0.254777	-0.000158972
B4	9	plc2	0.256493	0.00148943
B4	10	plc2	0.253727	-0.00134441
B4	11	plc2	0.253254	-0.00188428
B4	12	plc2	0.253717	-0.00148925
B4	13	plc2	0.253009	-0.00226452
B4	14	plc2	0.258614	0.0032729
B4	15	plc2	0.255418	9.31089e-06
B4	16	plc2	0.254056	-0.00141947
B4	17	plc2	0.255977	0.000433403
B4	18	plc2	0.25458	-0.00103037
B4	19	plc2	0.255182	-0.000496513
B4	20	plc2	0.258754	0.00300836
B4	21	plc2	0.263204	0.00739115
B4	22	plc2	0.276152	0.0202709
B4	23	plc2	0.296504	0.0405555
B4	24	plc2	0.333845	0.0778296
B4	25	plc2	0.408	0.151917
B4	26	plc2	0.537108	0.280958
B4	27	plc2	0.764496	0.508278
B4	28	plc2	1.08862	0.832331
B4	29	plc2	1.4656	1.20925
B4	30	plc2	1.79478	1.53836
B4	31	plc2	1.99386	1.73738
B4	32	plc2	2.13725	1.88069
B4	33	plc2	2.25431	1.99769
B4	34	plc2	2.35206	2.09537
B4	35	plc2	2.41423	2.15747
B4	36	plc2	2.47044	2.21362
B4	37	plc2	2.51766	2.26077
B4	38	plc2	2.55195	2.29499
B4	39	plc2	2.56284	2.30581
B4	40	plc2	2.59551	2.33842
B5	1	plc2	0.224346	0.00141536
B5	2	plc2	0.226665	0.00331504
B5	3	plc2	0.224921	0.00115351
B5	4	plc2	0.22522	0.00103322
B5	5	plc2	0.224365	-0.000239987
B5	6	plc2	0.224591	-0.000432504
B5	7	plc2	0.226249	0.000806772
B5	8	plc2	0.228037	0.00217649
B5	9	plc2	0.227347	0.00106796
B5	10	plc2	0.227147	0.000450221
B5	11	plc2	0.226728	-0.000388068
B5	12	plc2	0.2275	-3.37268e-05
B5	13	plc2	0.224507	-0.00344589
B5	14	plc2	0.226958	-0.00141277
B5	15	plc2	0.226581	-0.0022082
B5	16	plc2	0.227845	-0.00136293
B5	17	plc2	0.226106	-0.00352014
B5	18	plc2	0.229032	-0.00101332
B5	19	plc2	0.226806	-0.0036575
B5	20	plc2	0.231664	0.0007824
B5	21	plc2	0.241545	0.0102445
B5	22	plc2	0.251251	0.0195319
B5	23	plc2	0.272311	0.0401736
B5	24	plc2	0.315104	0.0825488
B5	25	plc2	0.400211	0.167237
B5	26	plc2	0.545352	0.311959
B5	27	plc2	0.785787	0.551976
B5	28	plc2	1.10522	0.870994
B5	29	plc2	1.44205	1.2074
B5	30	plc2	1.69295	1.45789
B5	31	plc2	1.85253	1.61705
B5	32	plc2	1.9707	1.73479
B5	33	plc2	2.06367	1.82735
B5	34	plc2	2.14213	1.90539
B5	35	plc2	2.19732	1.96016
B5	36	plc2	2.23784	2.00026
B5	37	plc2	2.28068	2.04269
B5	38	plc2	2.30356	2.06515
B5	39	plc2	2.32289	2.08405
B5	40	plc2	2.34267	2.10342
B6	1	plc2	0.206408	-0.00102939
B6	2	plc2	0.207191	-0.00046325
B6	3	plc2	0.208742	0.00087154
B6	4	plc2	0.209472	0.00138456
B6	5	plc2	0.208363	5.95843e-05
B6	6	plc2	0.208385	-0.000135632
B6	7	plc2	0.20895	0.000213224
B6	8	plc2	0.210334	0.00138021
B6	9	plc2	0.207806	-0.00136458
B6	10	plc2	0.21022	0.00083299
B6	11	plc2	0.209611	7.72335e-06
B6	12	plc2	0.209305	-0.000514961
B6	13	plc2	0.207074	-0.00296256
B6	14	plc2	0.208179	-0.00207454
B6	15	plc2	0.208933	-0.00153715
B6	16	plc2	0.209982	-0.000704293
B6	17	plc2	0.210529	-0.00037387
B6	18	plc2	0.210589	-0.000530388
B6	19	plc2	0.212639	0.00130256
B6	20	plc2	0.215698	0.00414557
B6	21	plc2	0.224001	0.0122314
B6	22	plc2	0.236223	0.0242369
B6	23	plc2	0.263612	0.0514095
B6	24	plc2	0.311554	0.0991349
B6	25	plc2	0.411944	0.199308
B6	26	plc2	0.573548	0.360696
B6	27	plc2	0.847025	0.633957
B6	28	plc2	1.20372	0.990431
B6	29	plc2	1.58587	1.37237
B6	30	plc2	1.86478	1.65106
B6	31	plc2	2.0524	1.83846
B6	32	plc2	2.19009	1.97594
B6	33	plc2	2.29353	2.07916
B6	34	plc2	2.37995	2.16537
B6	35	plc2	2.44542	2.23062
B6	36	plc2	2.49133	2.27631
B6	37	plc2	2.53856	2.32332
B6	38	plc2	2.55295	2.3375
B6	39	plc2	2.58562	2.36995
B6	40	plc2	2.59576	2.37987
B7	1	plc3	0.24661	-0.00321666
B7	2	plc3	0.25035	0.000369209
B7	3	plc3	0.251801	0.00166578
B7	4	plc3	0.249837	-0.000452425
B7	5	plc3	0.249697	-0.000746924
B7	6	plc3	0.250471	-0.000127295
B7	7	plc3	0.251991	0.00123893
B7	8	plc3	0.251489	0.000582284
B7	9	plc3	0.253225	0.00216401
B7	10	plc3	0.251578	0.000362777
B7	11	plc3	0.24936	-0.00200927
B7	12	plc3	0.249867	-0.00165633
B7	13	plc3	0.252836	0.00115779
B7	14	plc3	0.24951	-0.00232239
B7	15	plc3	0.250588	-0.00139866
B7	16	plc3	0.251039	-0.00110166
B7	17	plc3	0.250392	-0.00190299
B7	18	plc3	0.253034	0.000584571
B7	19	plc3	0.253417	0.00081291
B7	20	plc3	0.251951	-0.000807241
B7	21	plc3	0.254497	0.0015843
B7	22	plc3	0.255438	0.00237185
B7	23	plc3	0.262598	0.00937664
B7	24	plc3	0.275562	0.0221868
B7	25	plc3	0.300416	0.0468865
B7	26	plc3	0.344375	0.0906909
B7	27	plc3	0.428111	0.174273
B7	28	plc3	0.574249	0.320256
B7	29	plc3	0.812012	0.557866
B7	30	plc3	1.12319	0.868889
B7	31	plc3	1.36974	1.11528
B7	32	plc3	1.4931	1.23849
B7	33	plc3	1.64485	1.39008
B7	34	plc3	1.80105	1.54613
B7	35	plc3	1.92873	1.67366
B7	36	plc3	2.04242	1.7872
B7	37	plc3	2.13085	1.87547
B7	38	plc3	2.1983	1.94276
B7	39	plc3	2.25763	2.00194
B7	40	plc3	2.30994	2.0541
B8	1	plc3	0.270474	-0.0046444
B8	2	plc3	0.274279	-0.0010489
B8	3	plc3	0.277056	0.00151837
B8	4	plc3	0.27739	0.00164264
B8	5	plc3	0.274472	-0.00148543
B8	6	plc3	0.275649	-0.000517958
B8	7	plc3	0.277327	0.000950346
B8	8	plc3	0.277399	0.000813318
B8	9	plc3	0.276702	-9.38615e-05
B8	10	plc3	0.278094	0.00108876
B8	11	plc3	0.275116	-0.00209845
B8	12	plc3	0.276862	-0.000562464
B8	13	plc3	0.27773	9.56342e-05
B8	14	plc3	0.277052	-0.000791965
B8	15	plc3	0.277345	-0.00070783
B8	16	plc3	0.276629	-0.00163349
B8	17	plc3	0.277444	-0.00102885
B8	18	plc3	0.277572	-0.00111024
B8	19	plc3	0.277317	-0.00157489
B8	20	plc3	0.27933	0.000228932
B8	21	plc3	0.279738	0.000426972
B8	22	plc3	0.284361	0.00484046
B8	23	plc3	0.291462	0.0117317
B8	24	plc3	0.30283	0.0228898
B8	25	plc3	0.325167	0.0450177
B8	26	plc3	0.373623	0.0932642
B8	27	plc3	0.460945	0.180376
B8	28	plc3	0.612585	0.331807
B8	29	plc3	0.853468	0.57248
B8	30	plc3	1.17609	0.894895
B8	31	plc3	1.41644	1.13504
B8	32	plc3	1.53816	1.25654
B8	33	plc3	1.6862	1.40437
B8	34	plc3	1.84162	1.55958
B8	35	plc3	1.97953	1.69728
B8	36	plc3	2.0844	1.80194
B8	37	plc3	2.17586	1.8932
B8	38	plc3	2.24246	1.95959
B8	39	plc3	2.29677	2.01368
B8	40	plc3	2.3491	2.06581
B9	1	plc3	0.294223	-0.00632826
B9	2	plc3	0.299166	-0.00166641
B9	3	plc3	0.302158	0.0010441
B9	4	plc3	0.301238	-0.000157488
B9	5	plc3	0.301794	0.000117484
B9	6	plc3	0.3037	0.00174113
B9	7	plc3	0.303163	0.000922746
B9	8	plc3	0.30122	-0.00130186
B9	9	plc3	0.304554	0.00175081
B9	10	plc3	0.302994	-9.07529e-05
B9	11	plc3	0.302198	-0.00116785
B9	12	plc3	0.302514	-0.00113371
B9	13	plc3	0.305578	0.00164916
B9	14	plc3	0.301797	-0.00241363
B9	15	plc3	0.301577	-0.00291516
B9	16	plc3	0.303144	-0.00162992
B9	17	plc3	0.30437	-0.000685166
B9	18	plc3	0.305265	-7.1341e-05
B9	19	plc3	0.305254	-0.000364043
B9	20	plc3	0.304517	-0.00138267
B9	21	plc3	0.30844	0.00225949
B9	22	plc3	0.310291	0.00382869
B9	23	plc3	0.315503	0.00875884
B9	24	plc3	0.327821	0.0207956
B9	25	plc3	0.350683	0.0433759
B9	26	plc3	0.397019	0.0894304
B9	27	plc3	0.477769	0.1699
B9	28	plc3	0.619988	0.311837
B9	29	plc3	0.852943	0.54451
B9	30	plc3	1.15614	0.847426
B9	31	plc3	1.38549	1.07649
B9	32	plc3	1.50078	1.1915
B9	33	plc3	1.64856	1.339
B9	34	plc3	1.79383	1.48399
B9	35	plc3	1.91273	1.60261
B9	36	plc3	2.01634	1.70593
B9	37	plc3	2.09609	1.78541
B9	38	plc3	2.172	1.86103
B9	39	plc3	2.2308	1.91956
B9	40	plc3	2.2814	1.96987
B10	1	spx16	0.291453	-0.0182029
B10	2	spx16	0.301794	-0.00845016
B10	3	spx16	0.306735	-0.00409646
B10	4	spx16	0.310122	-0.00129702
B10	5	spx16	0.313905	0.00189799
B10	6	spx16	0.315271	0.00267558
B10	7	spx16	0.312897	-0.000285379
B10	8	spx16	0.313729	-4.1337e-05
B10	9	spx16	0.315773	0.00141512
B10	10	spx16	0.31456	-0.000386078
B10	11	spx16	0.318853	0.00331962
B10	12	spx16	0.317036	0.000914954
B10	13	spx16	0.317434	0.000724865
B10	14	spx16	0.317188	-0.000109132
B10	15	spx16	0.316377	-0.00150806
B10	16	spx16	0.317117	-0.00135501
B10	17	spx16	0.319109	4.86445e-05
B10	18	spx16	0.317291	-0.00235638
B10	19	spx16	0.319757	-0.000478547
B10	20	spx16	0.319099	-0.00172471
B10	21	spx16	0.320049	-0.00136238
B10	22	spx16	0.326003	0.00400373
B10	23	spx16	0.333441	0.0108544
B10	24	spx16	0.34895	0.0257754
B10	25	spx16	0.384156	0.060394
B10	26	spx16	0.446616	0.122267
B10	27	spx16	0.55979	0.234852
B10	28	spx16	0.756378	0.430853
B10	29	spx16	1.05103	0.72492
B10	30	spx16	1.42422	1.09752
B10	31	spx16	1.7405	1.41321
B10	32	spx16	1.9505	1.62263
B10	33	spx16	2.10038	1.77192
B10	34	spx16	2.23392	1.90487
B10	35	spx16	2.3364	2.00676
B10	36	spx16	2.41159	2.08136
B10	37	spx16	2.48173	2.15092
B10	38	spx16	2.53138	2.19998
B10	39	spx16	2.58565	2.25366
B10	40	spx16	2.61336	2.28078
B11	1	spx16	0.304301	-0.0110203
B11	2	spx16	0.30941	-0.00646188
B11	3	spx16	0.312629	-0.003793
B11	4	spx16	0.316872	-0.000100921
B11	5	spx16	0.318936	0.00141211
B11	6	spx16	0.320739	0.00266517
B11	7	spx16	0.319432	0.000806834
B11	8	spx16	0.322239	0.00306379
B11	9	spx16	0.31957	-0.000155738
B11	10	spx16	0.320823	0.000546635
B11	11	spx16	0.3188	-0.00202746
B11	12	spx16	0.321948	0.000570729
B11	13	spx16	0.321744	-0.000184589
B11	14	spx16	0.321708	-0.000770511
B11	15	spx16	0.322172	-0.000857661
B11	16	spx16	0.323264	-0.000316221
B11	17	spx16	0.323424	-0.000706282
B11	18	spx16	0.321954	-0.00272733
B11	19	spx16	0.324425	-0.000806761
B11	20	spx16	0.325235	-0.000547311
B11	21	spx16	0.324314	-0.0020186
B11	22	spx16	0.33283	0.00594714
B11	23	spx16	0.337707	0.0102731
B11	24	spx16	0.353824	0.0258396
B11	25	spx16	0.382392	0.0538567
B11	26	spx16	0.439016	0.10993
B11	27	spx16	0.54382	0.214184
B11	28	spx16	0.720348	0.390161
B11	29	spx16	0.99813	0.667392
B11	30	spx16	1.35129	1.02
B11	31	spx16	1.6793	1.34746
B11	32	spx16	1.89555	1.56316
B11	33	spx16	2.05105	1.71811
B11	34	spx16	2.18611	1.85262
B11	35	spx16	2.29401	1.95997
B11	36	spx16	2.37974	2.04515
B11	37	spx16	2.44695	2.11181
B11	38	spx16	2.50341	2.16772
B11	39	spx16	2.54458	2.20834
B11	40	spx16	2.58186	2.24506
B12	1	spx16	0.288156	-0.00653223
B12	2	spx16	0.291608	-0.0040207
B12	3	spx16	0.294888	-0.0016807
B12	4	spx16	0.298576	0.00106731
B12	5	spx16	0.298004	-0.000445836
B12	6	spx16	0.300438	0.00104875
B12	7	spx16	0.298735	-0.00159486
B12	8	spx16	0.301164	-0.000106019
B12	9	spx16	0.303004	0.000793717
B12	10	spx16	0.304075	0.000924434
B12	11	spx16	0.306877	0.00278577
B12	12	spx16	0.30652	0.00148893
B12	13	spx16	0.303738	-0.0022335
B12	14	spx16	0.303312	-0.00359984
B12	15	spx16	0.308673	0.000820531
B12	16	spx16	0.310081	0.00128885
B12	17	spx16	0.311546	0.0018137
B12	18	spx16	0.310398	-0.000274991
B12	19	spx16	0.308885	-0.00272852
B12	20	spx16	0.31089	-0.0016638
B12	21	spx16	0.314445	0.000951743
B12	22	spx16	0.315778	0.00134433
B12	23	spx16	0.324292	0.00891749
B12	24	spx16	0.340532	0.024218
B12	25	spx16	0.369905	0.0526503
B12	26	spx16	0.420569	0.102374
B12	27	spx16	0.524162	0.205026
B12	28	spx16	0.698741	0.378666
B12	29	spx16	0.973519	0.652503
B12	30	spx16	1.3129	0.990944
B12	31	spx16	1.62335	1.30046
B12	32	spx16	1.82594	1.5021
B12	33	spx16	1.98839	1.66361
B12	34	spx16	2.11612	1.7904
B12	35	spx16	2.23046	1.90381
B12	36	spx16	2.31767	1.99008
B12	37	spx16	2.38824	2.0597
B12	38	spx16	2.43316	2.10368
B12	39	spx16	2.48681	2.15639
B12	40	spx16	2.51845	2.18709
C1	1	plc1	0.301105	-0.00575412
C1	2	plc1	0.305809	-0.00202593
C1	3	plc1	0.307556	-0.00125401
C1	4	plc1	0.307767	-0.00201763
C1	5	plc1	0.312303	0.0015431
C1	6	plc1	0.311409	-0.000326298
C1	7	plc1	0.314857	0.0021459
C1	8	plc1	0.31449	0.000804032
C1	9	plc1	0.317698	0.0030368
C1	10	plc1	0.316004	0.00036676
C1	11	plc1	0.314781	-0.00183085
C1	12	plc1	0.316767	-0.000819862
C1	13	plc1	0.320151	0.00158832
C1	14	plc1	0.31821	-0.00132786
C1	15	plc1	0.31626	-0.00425289
C1	16	plc1	0.319556	-0.00193226
C1	17	plc1	0.323193	0.000729753
C1	18	plc1	0.326986	0.00354698
C1	19	plc1	0.336534	0.0121198
C1	20	plc1	0.35337	0.0279807
C1	21	plc1	0.387885	0.0615206
C1	22	plc1	0.454698	0.127358
C1	23	plc1	0.575502	0.247187
C1	24	plc1	0.776513	0.447223
C1	25	plc1	1.08859	0.758324
C1	26	plc1	1.44878	1.11754
C1	27	plc1	1.72752	1.39531
C1	28	plc1	1.8532	1.52001
C1	29	plc1	2.02357	1.6894
C1	30	plc1	2.16759	1.83244
C1	31	plc1	2.26072	1.9246
C1	32	plc1	2.33228	1.99519
C1	33	plc1	2.39666	2.05859
C1	34	plc1	2.4567	2.11766
C1	35	plc1	2.50057	2.16055
C1	36	plc1	2.54142	2.20042
C1	37	plc1	2.56092	2.21895
C1	38	plc1	2.58576	2.24282
C1	39	plc1	2.60016	2.25624
C1	40	plc1	2.62299	2.27809
C2	1	plc1	0.277131	-0.00379777
C2	2	plc1	0.283253	0.00176955
C2	3	plc1	0.282529	0.000492165
C2	4	plc1	0.28542	0.0028287
C2	5	plc1	0.283913	0.000767191
C2	6	plc1	0.284945	0.00124555
C2	7	plc1	0.282675	-0.00157929
C2	8	plc1	0.285218	0.000409846
C2	9	plc1	0.283199	-0.00216355
C2	10	plc1	0.286832	0.000915542
C2	11	plc1	0.285615	-0.00085647
C2	12	plc1	0.284766	-0.0022589
C2	13	plc1	0.286217	-0.00136271
C2	14	plc1	0.284406	-0.00372806
C2	15	plc1	0.286581	-0.0021066
C2	16	plc1	0.289437	0.000194892
C2	17	plc1	0.290518	0.000721384
C2	18	plc1	0.296831	0.0064803
C2	19	plc1	0.305108	0.0142032
C2	20	plc1	0.320711	0.0292514
C2	21	plc1	0.352847	0.0608334
C2	22	plc1	0.415409	0.122842
C2	23	plc1	0.529627	0.236506
C2	24	plc1	0.717976	0.4243
C2	25	plc1	1.00663	0.712396
C2	26	plc1	1.3485	1.05371
C2	27	plc1	1.61219	1.31685
C2	28	plc1	1.73876	1.44287
C2	29	plc1	1.89376	1.59732
C2	30	plc1	2.01886	1.72186
C2	31	plc1	2.11789	1.82033
C2	32	plc1	2.1855	1.88739
C2	33	plc1	2.23998	1.94132
C2	34	plc1	2.30022	2.001
C2	35	plc1	2.33495	2.03517
C2	36	plc1	2.35992	2.05959
C2	37	plc1	2.39246	2.09157
C2	38	plc1	2.41179	2.11036
C2	39	plc1	2.43435	2.13236
C2	40	plc1	2.45057	2.14802
C3	1	plc1	0.317252	0.000896304
C3	2	plc1	0.320131	0.00348139
C3	3	plc1	0.321944	0.00500148
C3	4	plc1	0.317661	0.000424288
C3	5	plc1	0.318722	0.0011922
C3	6	plc1	0.316801	-0.00102226
C3	7	plc1	0.320247	0.00213017
C3	8	plc1	0.320087	0.00167672
C3	9	plc1	0.317484	-0.00121989
C3	10	plc1	0.316185	-0.00281244
C3	11	plc1	0.315843	-0.00344798
C3	12	plc1	0.315075	-0.00450989
C3	13	plc1	0.314552	-0.00532633
C3	14	plc1	0.319714	-0.000457856
C3	15	plc1	0.317337	-0.00312794
C3	16	plc1	0.317185	-0.00357408
C3	17	plc1	0.326328	0.00527604
C3	18	plc1	0.331144	0.00979777
C3	19	plc1	0.337438	0.0157986
C3	20	plc1	0.355025	0.0330924
C3	21	plc1	0.394325	0.0720982
C3	22	plc1	0.458744	0.136224
C3	23	plc1	0.586896	0.264082
C3	24	plc1	0.797781	0.474674
C3	25	plc1	1.11014	0.786744
C3	26	plc1	1.48845	1.16475
C3	27	plc1	1.78603	1.46204
C3	28	plc1	1.92718	1.6029
C3	29	plc1	2.09134	1.76677
C3	30	plc1	2.23752	1.91265
C3	31	plc1	2.34471	2.01955
C3	32	plc1	2.42303	2.09758
C3	33	plc1	2.47693	2.15118
C3	34	plc1	2.5427	2.21665
C3	35	plc1	2.57984	2.25351
C3	36	plc1	2.60061	2.27398
C3	37	plc1	2.64376	2.31683
C3	38	plc1	2.66255	2.33533
C3	39	plc1	2.68368	2.35617
C3	40	plc1	2.70828	2.38048
C4	1	plc2	0.255283	-0.00331159
C4	2	plc2	0.259449	0.000576275
C4	3	plc2	0.262556	0.00340541
C4	4	plc2	0.260479	0.00105016
C4	5	plc2	0.258916	-0.000791471
C4	6	plc2	0.260894	0.000908365
C4	7	plc2	0.259052	-0.00121168
C4	8	plc2	0.26051	-3.24924e-05
C4	9	plc2	0.262741	0.00192057
C4	10	plc2	0.258724	-0.00237442
C4	11	plc2	0.259625	-0.00175223
C4	12	plc2	0.25985	-0.00180543
C4	13	plc2	0.262089	0.000155386
C4	14	plc2	0.260443	-0.00176937
C4	15	plc2	0.262153	-0.000336888
C4	16	plc2	0.260273	-0.00249559
C4	17	plc2	0.261809	-0.00123781
C4	18	plc2	0.262113	-0.00121185
C4	19	plc2	0.264369	0.000765951
C4	20	plc2	0.270695	0.00681338
C4	21	plc2	0.277456	0.0132957
C4	22	plc2	0.296282	0.0318432
C4	23	plc2	0.328919	0.0642022
C4	24	plc2	0.390642	0.125647
C4	25	plc2	0.506596	0.241323
C4	26	plc2	0.707041	0.441489
C4	27	plc2	1.01768	0.751848
C4	28	plc2	1.41728	1.15117
C4	29	plc2	1.78847	1.52208
C4	30	plc2	2.04303	1.77636
C4	31	plc2	2.20533	1.93839
C4	32	plc2	2.33302	2.06579
C4	33	plc2	2.43508	2.16758
C4	34	plc2	2.5192	2.25143
C4	35	plc2	2.57398	2.30592
C4	36	plc2	2.6174	2.34906
C4	37	plc2	2.65964	2.39102
C4	38	plc2	2.68132	2.41242
C4	39	plc2	2.71042	2.44125
C4	40	plc2	2.74186	2.47241
C5	1	plc2	0.249167	-0.00190556
C5	2	plc2	0.250785	-0.000518992
C5	3	plc2	0.252556	0.00102203
C5	4	plc2	0.2522	0.000434808
C5	5	plc2	0.253972	0.00197684
C5	6	plc2	0.251607	-0.000619086
C5	7	plc2	0.250021	-0.00243559
C5	8	plc2	0.255006	0.00231797
C5	9	plc2	0.252289	-0.000628792
C5	10	plc2	0.25134	-0.00180923
C5	11	plc2	0.253946	0.000566734
C5	12	plc2	0.255317	0.00170721
C5	13	plc2	0.255285	0.00144358
C5	14	plc2	0.251251	-0.00282083
C5	15	plc2	0.252112	-0.00219045
C5	16	plc2	0.252031	-0.00250191
C5	17	plc2	0.252033	-0.00273046
C5	18	plc2	0.254897	-9.73295e-05
C5	19	plc2	0.256172	0.000946649
C5	20	plc2	0.260873	0.00541783
C5	21	plc2	0.270242	0.0145556
C5	22	plc2	0.285292	0.0293752
C5	23	plc2	0.315054	0.0589063
C5	24	plc2	0.364819	0.108441
C5	25	plc2	0.470769	0.21416
C5	26	plc2	0.651852	0.395012
C5	27	plc2	0.940981	0.68391
C5	28	plc2	1.31536	1.05806
C5	29	plc2	1.70317	1.44564
C5	30	plc2	1.98211	1.72435
C5	31	plc2	2.16135	1.90336
C5	32	plc2	2.29494	2.03672
C5	33	plc2	2.40591	2.14746
C5	34	plc2	2.49563	2.23694
C5	35	plc2	2.56125	2.30233
C5	36	plc2	2.61461	2.35547
C5	37	plc2	2.6431	2.38372
C5	38	plc2	2.67624	2.41663
C5	39	plc2	2.69595	2.43611
C5	40	plc2	2.71302	2.45295
C6	1	plc2	0.232883	-0.000878256
C6	2	plc2	0.235085	0.000941223
C6	3	plc2	0.238201	0.00367481
C6	4	plc2	0.233972	-0.00093733
C6	5	plc2	0.236359	0.00106764
C6	6	plc2	0.236233	0.000559081
C6	7	plc2	0.237213	0.00115641
C6	8	plc2	0.235782	-0.000657116
C6	9	plc2	0.235401	-0.00142062
C6	10	plc2	0.237277	7.29424e-05
C6	11	plc2	0.236919	-0.000667002
C6	12	plc2	0.23795	-1.86638e-05
C6	13	plc2	0.235626	-0.00272465
C6	14	plc2	0.236788	-0.00194529
C6	15	plc2	0.235774	-0.00334184
C6	16	plc2	0.237268	-0.00223079
C6	17	plc2	0.239182	-0.000699289
C6	18	plc2	0.239828	-0.000435312
C6	19	plc2	0.242576	0.00193059
C6	20	plc2	0.247645	0.00661642
C6	21	plc2	0.255629	0.0142185
C6	22	plc2	0.275929	0.0341364
C6	23	plc2	0.313801	0.0716256
C6	24	plc2	0.38607	0.143512
C6	25	plc2	0.519537	0.276597
C6	26	plc2	0.742906	0.499583
C6	27	plc2	1.07976	0.836058
C6	28	plc2	1.48197	1.23789
C6	29	plc2	1.84046	1.59599
C6	30	plc2	2.0879	1.84305
C6	31	plc2	2.24047	1.99523
C6	32	plc2	2.36761	2.12199
C6	33	plc2	2.47008	2.22408
C6	34	plc2	2.55649	2.31011
C6	35	plc2	2.60446	2.35769
C6	36	plc2	2.64947	2.40232
C6	37	plc2	2.70029	2.45276
C6	38	plc2	2.70687	2.45895
C6	39	plc2	2.72917	2.48088
C6	40	plc2	2.75153	2.50286
C7	1	plc3	0.2503	-0.00425547
C7	2	plc3	0.253049	-0.00170525
C7	3	plc3	0.255082	0.000127754
C7	4	plc3	0.257954	0.00279963
C7	5	plc3	0.254915	-0.000438738
C7	6	plc3	0.25613	0.000576846
C7	7	plc3	0.253938	-0.00181487
C7	8	plc3	0.25571	-0.00024231
C7	9	plc3	0.257952	0.00180002
C7	10	plc3	0.256544	0.000191573
C7	11	plc3	0.255928	-0.000624166
C7	12	plc3	0.256737	-1.39832e-05
C7	13	plc3	0.254989	-0.00196167
C7	14	plc3	0.258479	0.00132878
C7	15	plc3	0.256005	-0.00134549
C7	16	plc3	0.258641	0.0010908
C7	17	plc3	0.253711	-0.004039
C7	18	plc3	0.257412	-0.000537281
C7	19	plc3	0.256422	-0.00172689
C7	20	plc3	0.257261	-0.00108765
C7	21	plc3	0.259233	0.000684198
C7	22	plc3	0.260225	0.00147695
C7	23	plc3	0.262703	0.0037555
C7	24	plc3	0.272602	0.0134544
C7	25	plc3	0.290311	0.0309636
C7	26	plc3	0.319905	0.0603581
C7	27	plc3	0.378837	0.119091
C7	28	plc3	0.486189	0.226243
C7	29	plc3	0.666861	0.406716
C7	30	plc3	0.946884	0.686538
C7	31	plc3	1.26219	1.00164
C7	32	plc3	1.44403	1.18328
C7	33	plc3	1.57384	1.31289
C7	34	plc3	1.75319	1.49204
C7	35	plc3	1.90692	1.64558
C7	36	plc3	2.03387	1.77232
C7	37	plc3	2.14404	1.8823
C7	38	plc3	2.21911	1.95716
C7	39	plc3	2.29381	2.03166
C7	40	plc3	2.3506	2.08826
C8	1	plc3	0.28036	-0.00253499
C8	2	plc3	0.282696	-0.000408147
C8	3	plc3	0.285291	0.0019778
C8	4	plc3	0.283703	0.000181161
C8	5	plc3	0.28325	-0.00048069
C8	6	plc3	0.284232	0.00029247
C8	7	plc3	0.283795	-0.000353764
C8	8	plc3	0.284698	0.000340301
C8	9	plc3	0.283988	-0.000578387
C8	10	plc3	0.285029	0.000253544
C8	11	plc3	0.285856	0.000871702
C8	12	plc3	0.285662	0.000468982
C8	13	plc3	0.285109	-0.000292796
C8	14	plc3	0.284021	-0.00158944
C8	15	plc3	0.284959	-0.000860742
C8	16	plc3	0.285548	-0.000480466
C8	17	plc3	0.285258	-0.000979119
C8	18	plc3	0.286614	0.000167852
C8	19	plc3	0.283389	-0.00326603
C8	20	plc3	0.285482	-0.00138178
C8	21	plc3	0.286789	-0.00028333
C8	22	plc3	0.287995	0.000713974
C8	23	plc3	0.292769	0.00527876
C8	24	plc3	0.302387	0.0146879
C8	25	plc3	0.321882	0.0339746
C8	26	plc3	0.356764	0.0686468
C8	27	plc3	0.420363	0.132037
C8	28	plc3	0.537379	0.248844
C8	29	plc3	0.740848	0.452104
C8	30	plc3	1.03479	0.745836
C8	31	plc3	1.34035	1.05119
C8	32	plc3	1.49704	1.20767
C8	33	plc3	1.63527	1.3457
C8	34	plc3	1.80355	1.51377
C8	35	plc3	1.95681	1.66682
C8	36	plc3	2.07731	1.78711
C8	37	plc3	2.17708	1.88667
C8	38	plc3	2.24572	1.95509
C8	39	plc3	2.3176	2.02677
C8	40	plc3	2.37617	2.08513
C9	1	plc3	0.395706	-0.0172713
C9	2	plc3	0.404089	-0.00880966
C9	3	plc3	0.413178	0.000358078
C9	4	plc3	0.414743	0.00200234
C9	5	plc3	0.413848	0.00118564
C9	6	plc3	0.414117	0.00153341
C9	7	plc3	0.412813	0.000307939
C9	8	plc3	0.411427	-0.000999336
C9	9	plc3	0.412195	-0.000151991
C9	10	plc3	0.411707	-0.000561679
C9	11	plc3	0.409709	-0.00248112
C9	12	plc3	0.41244	0.000328346
C9	13	plc3	0.410152	-0.00188018
C9	14	plc3	0.411632	-0.000321454
C9	15	plc3	0.411958	8.29378e-05
C9	16	plc3	0.410308	-0.00148806
C9	17	plc3	0.410603	-0.00111517
C9	18	plc3	0.410243	-0.00139635
C9	19	plc3	0.410099	-0.00146119
C9	20	plc3	0.409255	-0.00222654
C9	21	plc3	0.413802	0.00239959
C9	22	plc3	0.417209	0.0058848
C9	23	plc3	0.418536	0.00729058
C9	24	plc3	0.434494	0.0233269
C9	25	plc3	0.454649	0.0435612
C9	26	plc3	0.497446	0.0864372
C9	27	plc3	0.575926	0.164996
C9	28	plc3	0.719889	0.309038
C9	29	plc3	0.960884	0.550111
C9	30	plc3	1.29602	0.885329
C9	31	plc3	1.52702	1.11641
C9	32	plc3	1.58992	1.17938
C9	33	plc3	1.70961	1.29915
C9	34	plc3	1.82832	1.41795
C9	35	plc3	1.93215	1.52185
C9	36	plc3	2.02097	1.61075
C9	37	plc3	2.10114	1.691
C9	38	plc3	2.15375	1.74369
C9	39	plc3	2.20173	1.79175
C9	40	plc3	2.24928	1.83937
C10	1	spx16	0.27896	-0.00209904
C10	2	spx16	0.280931	-0.000420351
C10	3	spx16	0.28265	0.00100689
C10	4	spx16	0.282721	0.000786098
C10	5	spx16	0.284704	0.00247808
C10	6	spx16	0.280962	-0.00155616
C10	7	spx16	0.28123	-0.00158017
C10	8	spx16	0.28324	0.000138477
C10	9	spx16	0.283171	-0.000222508
C10	10	spx16	0.284725	0.00103966
C10	11	spx16	0.282119	-0.00185837
C10	12	spx16	0.286284	0.00201529
C10	13	spx16	0.284014	-0.000546326
C10	14	spx16	0.284079	-0.000773975
C10	15	spx16	0.284738	-0.00040683
C10	16	spx16	0.284129	-0.00130703
C10	17	spx16	0.284745	-0.000982589
C10	18	spx16	0.284714	-0.00130632
C10	19	spx16	0.285888	-0.000423983
C10	20	spx16	0.283939	-0.0026649
C10	21	spx16	0.287394	0.000498987
C10	22	spx16	0.292853	0.00566568
C10	23	spx16	0.300123	0.0126444
C10	24	spx16	0.317189	0.0294183
C10	25	spx16	0.345504	0.057441
C10	26	spx16	0.406216	0.117862
C10	27	spx16	0.515221	0.226575
C10	28	spx16	0.697803	0.408865
C10	29	spx16	0.984495	0.695265
C10	30	spx16	1.34011	1.05059
C10	31	spx16	1.65702	1.36721
C10	32	spx16	1.87088	1.58077
C10	33	spx16	2.01921	1.72882
C10	34	spx16	2.14496	1.85427
C10	35	spx16	2.25921	1.96823
C10	36	spx16	2.34249	2.05121
C10	37	spx16	2.41301	2.12144
C10	38	spx16	2.46408	2.17223
C10	39	spx16	2.50153	2.20939
C10	40	spx16	2.53969	2.24725
C11	1	spx16	0.240112	-0.0071999
C11	2	spx16	0.246885	-0.000812107
C11	3	spx16	0.247292	-0.000789952
C11	4	spx16	0.251302	0.00283475
C11	5	spx16	0.250116	0.00126387
C11	6	spx16	0.249093	-0.000143967
C11	7	spx16	0.250476	0.000854318
C11	8	spx16	0.253073	0.00306562
C11	9	spx16	0.247846	-0.00254578
C11	10	spx16	0.250504	-0.000272666
C11	11	spx16	0.250488	-0.000673719
C11	12	spx16	0.25221	0.000662405
C11	13	spx16	0.248159	-0.00377309
C11	14	spx16	0.250798	-0.00151889
C11	15	spx16	0.2529	0.000198135
C11	16	spx16	0.251339	-0.00174859
C11	17	spx16	0.250341	-0.00313174
C11	18	spx16	0.254364	0.000506401
C11	19	spx16	0.252211	-0.00203154
C11	20	spx16	0.254698	7.05651e-05
C11	21	spx16	0.256034	0.00102194
C11	22	spx16	0.261549	0.00615193
C11	23	spx16	0.269346	0.0135633
C11	24	spx16	0.285659	0.0294917
C11	25	spx16	0.314951	0.0583984
C11	26	spx16	0.369497	0.112559
C11	27	spx16	0.473976	0.216654
C11	28	spx16	0.65435	0.396642
C11	29	spx16	0.937845	0.679753
C11	30	spx16	1.29926	1.04078
C11	31	spx16	1.62598	1.36712
C11	32	spx16	1.84519	1.58594
C11	33	spx16	2.00522	1.74558
C11	34	spx16	2.139	1.87898
C11	35	spx16	2.25389	1.99349
C11	36	spx16	2.34671	2.08592
C11	37	spx16	2.40427	2.1431
C11	38	spx16	2.46826	2.2067
C11	39	spx16	2.51077	2.24883
C11	40	spx16	2.55406	2.29173
C12	1	spx16	0.290347	-0.0127176
C12	2	spx16	0.297508	-0.00657674
C12	3	spx16	0.299132	-0.00597314
C12	4	spx16	0.301994	-0.00413162
C12	5	spx16	0.307409	0.000263514
C12	6	spx16	0.308969	0.000802795
C12	7	spx16	0.308369	-0.000817549
C12	8	spx16	0.313705	0.00349822
C12	9	spx16	0.315685	0.00445781
C12	10	spx16	0.317873	0.00562586
C12	11	spx16	0.314742	0.00147389
C12	12	spx16	0.316566	0.00227779
C12	13	spx16	0.315933	0.000625079
C12	14	spx16	0.317706	0.00137786
C12	15	spx16	0.316133	-0.00121538
C12	16	spx16	0.314881	-0.0034883
C12	17	spx16	0.318895	-0.000494384
C12	18	spx16	0.319288	-0.00112163
C12	19	spx16	0.319805	-0.0016248
C12	20	spx16	0.320524	-0.00192687
C12	21	spx16	0.321316	-0.00215449
C12	22	spx16	0.327036	0.00254534
C12	23	spx16	0.335331	0.00981983
C12	24	spx16	0.35181	0.0252785
C12	25	spx16	0.383157	0.0556056
C12	26	spx16	0.445333	0.116761
C12	27	spx16	0.558616	0.229023
C12	28	spx16	0.740976	0.410363
C12	29	spx16	1.02175	0.690116
C12	30	spx16	1.35128	1.01862
C12	31	spx16	1.62136	1.28768
C12	32	spx16	1.81501	1.48031
C12	33	spx16	1.95336	1.61765
C12	34	spx16	2.08961	1.75287
C12	35	spx16	2.19791	1.86016
C12	36	spx16	2.29551	1.95673
C12	37	spx16	2.3702	2.0304
C12	38	spx16	2.42128	2.08046
C12	39	spx16	2.47074	2.1289
C12	40	spx16	2.5109	2.16804
D1	1	plc1	0.326337	-0.00353544
D1	2	plc1	0.331578	0.00103428
D1	3	plc1	0.330793	-0.000422903
D1	4	plc1	0.333392	0.00150397
D1	5	plc1	0.331739	-0.000820275
D1	6	plc1	0.335225	0.00199334
D1	7	plc1	0.334638	0.000735479
D1	8	plc1	0.335548	0.000973725
D1	9	plc1	0.333803	-0.00144389
D1	10	plc1	0.335328	-0.000589991
D1	11	plc1	0.335012	-0.00157829
D1	12	plc1	0.334368	-0.00289379
D1	13	plc1	0.337768	-0.000165617
D1	14	plc1	0.336443	-0.00216204
D1	15	plc1	0.341135	0.00185809
D1	16	plc1	0.341168	0.00121941
D1	17	plc1	0.342413	0.00179278
D1	18	plc1	0.352226	0.0109338
D1	19	plc1	0.369327	0.0273626
D1	20	plc1	0.399671	0.057035
D1	21	plc1	0.462454	0.119147
D1	22	plc1	0.571448	0.227469
D1	23	plc1	0.765128	0.420477
D1	24	plc1	1.06176	0.716433
D1	25	plc1	1.44945	1.10345
D1	26	plc1	1.76818	1.42151
D1	27	plc1	1.94767	1.60033
D1	28	plc1	2.09647	1.74846
D1	29	plc1	2.25457	1.90589
D1	30	plc1	2.36326	2.01391
D1	31	plc1	2.45508	2.10506
D1	32	plc1	2.52206	2.17137
D1	33	plc1	2.57864	2.22728
D1	34	plc1	2.61762	2.26558
D1	35	plc1	2.65807	2.30536
D1	36	plc1	2.68829	2.33491
D1	37	plc1	2.7161	2.36204
D1	38	plc1	2.73349	2.37876
D1	39	plc1	2.75602	2.40062
D1	40	plc1	2.77588	2.41981
D2	1	plc1	0.296748	-0.00173911
D2	2	plc1	0.300793	0.00189226
D2	3	plc1	0.302307	0.00299345
D2	4	plc1	0.301294	0.00156734
D2	5	plc1	0.300508	0.000368233
D2	6	plc1	0.299967	-0.000586434
D2	7	plc1	0.301736	0.000769116
D2	8	plc1	0.298963	-0.00241739
D2	9	plc1	0.302421	0.000627745
D2	10	plc1	0.298404	-0.00380256
D2	11	plc1	0.300353	-0.00226712
D2	12	plc1	0.303352	0.000318907
D2	13	plc1	0.300297	-0.00314979
D2	14	plc1	0.303819	-4.0766e-05
D2	15	plc1	0.304063	-0.000210768
D2	16	plc1	0.305247	0.000560776
D2	17	plc1	0.310369	0.00526927
D2	18	plc1	0.320191	0.0146779
D2	19	plc1	0.337872	0.0319456
D2	20	plc1	0.368107	0.0617668
D2	21	plc1	0.427648	0.120894
D2	22	plc1	0.535728	0.228561
D2	23	plc1	0.732618	0.425038
D2	24	plc1	1.03315	0.725159
D2	25	plc1	1.41108	1.10267
D2	26	plc1	1.71627	1.40745
D2	27	plc1	1.88383	1.57459
D2	28	plc1	2.03161	1.72196
D2	29	plc1	2.1868	1.87674
D2	30	plc1	2.28724	1.97677
D2	31	plc1	2.37375	2.06286
D2	32	plc1	2.43283	2.12153
D2	33	plc1	2.48354	2.17183
D2	34	plc1	2.53713	2.225
D2	35	plc1	2.57467	2.26213
D2	36	plc1	2.60508	2.29213
D2	37	plc1	2.632	2.31864
D2	38	plc1	2.64726	2.33348
D2	39	plc1	2.66195	2.34776
D2	40	plc1	2.68962	2.37501
D3	1	plc1	0.347389	-0.000400431
D3	2	plc1	0.348433	0.00065965
D3	3	plc1	0.349086	0.00132881
D3	4	plc1	0.348184	0.000443489
D3	5	plc1	0.346481	-0.00124391
D3	6	plc1	0.347768	5.96297e-05
D3	7	plc1	0.346774	-0.000918113
D3	8	plc1	0.34978	0.0021032
D3	9	plc1	0.347734	7.32565e-05
D3	10	plc1	0.344773	-0.00287105
D3	11	plc1	0.347771	0.000142601
D3	12	plc1	0.348397	0.000785032
D3	13	plc1	0.345733	-0.00186352
D3	14	plc1	0.347219	-0.00036123
D3	15	plc1	0.348665	0.00110103
D3	16	plc1	0.348769	0.00122076
D3	17	plc1	0.35145	0.00391818
D3	18	plc1	0.361654	0.0141381
D3	19	plc1	0.377635	0.0301358
D3	20	plc1	0.402969	0.0554854
D3	21	plc1	0.457347	0.10988
D3	22	plc1	0.559499	0.212048
D3	23	plc1	0.733053	0.385618
D3	24	plc1	1.01853	0.671114
D3	25	plc1	1.38668	1.03928
D3	26	plc1	1.73033	1.38294
D3	27	plc1	1.92473	1.57736
D3	28	plc1	2.06704	1.71969
D3	29	plc1	2.21497	1.86763
D3	30	plc1	2.34474	1.99741
D3	31	plc1	2.43525	2.08795
D3	32	plc1	2.49087	2.14358
D3	33	plc1	2.55405	2.20678
D3	34	plc1	2.60751	2.26025
D3	35	plc1	2.63486	2.28762
D3	36	plc1	2.6634	2.31618
D3	37	plc1	2.69459	2.34738
D3	38	plc1	2.71351	2.36632
D3	39	plc1	2.72899	2.38182
D3	40	plc1	2.7556	2.40844
D4	1	plc2	0.263485	0.00123207
D4	2	plc2	0.266379	0.00383988
D4	3	plc2	0.265845	0.00301854
D4	4	plc2	0.264894	0.00178164
D4	5	plc2	0.263811	0.000411737
D4	6	plc2	0.261778	-0.00190791
D4	7	plc2	0.264365	0.000392846
D4	8	plc2	0.266006	0.00174651
D4	9	plc2	0.26452	-2.63494e-05
D4	10	plc2	0.263885	-0.000947343
D4	11	plc2	0.262307	-0.00281191
D4	12	plc2	0.265258	-0.000147713
D4	13	plc2	0.264491	-0.00120142
D4	14	plc2	0.262376	-0.00360299
D4	15	plc2	0.264644	-0.00162148
D4	16	plc2	0.265707	-0.000845348
D4	17	plc2	0.264565	-0.00227432
D4	18	plc2	0.264587	-0.00253916
D4	19	plc2	0.271731	0.0043181
D4	20	plc2	0.273956	0.00625655
D4	21	plc2	0.283088	0.0151026
D4	22	plc2	0.303301	0.0350284
D4	23	plc2	0.338906	0.0703468
D4	24	plc2	0.406172	0.137326
D4	25	plc2	0.536259	0.267127
D4	26	plc2	0.756428	0.487009
D4	27	plc2	1.0803	0.810596
D4	28	plc2	1.47603	1.20604
D4	29	plc2	1.81518	1.5449
D4	30	plc2	2.04629	1.77572
D4	31	plc2	2.19732	1.92647
D4	32	plc2	2.31226	2.04112
D4	33	plc2	2.4044	2.13297
D4	34	plc2	2.49761	2.22589
D4	35	plc2	2.55015	2.27815
D4	36	plc2	2.59298	2.3207
D4	37	plc2	2.62413	2.35156
D4	38	plc2	2.64611	2.37325
D4	39	plc2	2.66809	2.39494
D4	40	plc2	2.68504	2.41161
D5	1	plc2	0.266269	-0.00316392
D5	2	plc2	0.267553	-0.0021486
D5	3	plc2	0.270205	0.000233482
D5	4	plc2	0.270326	8.55566e-05
D5	5	plc2	0.271185	0.000675685
D5	6	plc2	0.271001	0.00022309
D5	7	plc2	0.271258	0.000210884
D5	8	plc2	0.270496	-0.000820561
D5	9	plc2	0.271353	-0.000232996
D5	10	plc2	0.27415	0.00229518
D5	11	plc2	0.271224	-0.00089929
D5	12	plc2	0.270761	-0.00163203
D5	13	plc2	0.27309	0.000428518
D5	14	plc2	0.271683	-0.00124836
D5	15	plc2	0.27221	-0.000989898
D5	16	plc2	0.272162	-0.00130662
D5	17	plc2	0.274036	0.000297767
D5	18	plc2	0.27437	0.000363196
D5	19	plc2	0.276593	0.00231639
D5	20	plc2	0.282872	0.00832688
D5	21	plc2	0.292947	0.0181322
D5	22	plc2	0.311029	0.0359457
D5	23	plc2	0.344461	0.0691082
D5	24	plc2	0.414742	0.139121
D5	25	plc2	0.540672	0.264781
D5	26	plc2	0.756898	0.480738
D5	27	plc2	1.08277	0.80634
D5	28	plc2	1.48537	1.20868
D5	29	plc2	1.84352	1.56655
D5	30	plc2	2.10207	1.82483
D5	31	plc2	2.27116	1.99366
D5	32	plc2	2.39417	2.1164
D5	33	plc2	2.50005	2.22201
D5	34	plc2	2.58732	2.30901
D5	35	plc2	2.64324	2.36466
D5	36	plc2	2.68814	2.40929
D5	37	plc2	2.72737	2.44825
D5	38	plc2	2.75242	2.47303
D5	39	plc2	2.76082	2.48117
D5	40	plc2	2.78791	2.50799
D6	1	plc2	0.295747	-0.00316699
D6	2	plc2	0.298937	-0.000317505
D6	3	plc2	0.301616	0.00202061
D6	4	plc2	0.300883	0.000946379
D6	5	plc2	0.302155	0.00187725
D6	6	plc2	0.301217	0.000597898
D6	7	plc2	0.298772	-0.0021885
D6	8	plc2	0.301781	0.000479669
D6	9	plc2	0.300059	-0.00158307
D6	10	plc2	0.301672	-0.00031096
D6	11	plc2	0.302332	8.16162e-06
D6	12	plc2	0.303498	0.000832343
D6	13	plc2	0.301651	-0.00135548
D6	14	plc2	0.301665	-0.00168235
D6	15	plc2	0.300184	-0.00350461
D6	16	plc2	0.301887	-0.00214244
D6	17	plc2	0.302279	-0.00209172
D6	18	plc2	0.305156	0.000444397
D6	19	plc2	0.306578	0.00152559
D6	20	plc2	0.311521	0.00612683
D6	21	plc2	0.320977	0.0152426
D6	22	plc2	0.339022	0.0329458
D6	23	plc2	0.376314	0.0698972
D6	24	plc2	0.444615	0.137857
D6	25	plc2	0.574337	0.267238
D6	26	plc2	0.788436	0.480996
D6	27	plc2	1.11618	0.808396
D6	28	plc2	1.50279	1.19467
D6	29	plc2	1.8516	1.54314
D6	30	plc2	2.08588	1.77708
D6	31	plc2	2.25359	1.94445
D6	32	plc2	2.36885	2.05936
D6	33	plc2	2.4819	2.17207
D6	34	plc2	2.55518	2.24501
D6	35	plc2	2.60547	2.29496
D6	36	plc2	2.65422	2.34337
D6	37	plc2	2.69476	2.38356
D6	38	plc2	2.71485	2.40332
D6	39	plc2	2.73103	2.41915
D6	40	plc2	2.75392	2.44171
D7	1	plc3	0.24214	-0.003277
D7	2	plc3	0.242233	-0.00325853
D7	3	plc3	0.246572	0.00100578
D7	4	plc3	0.246609	0.000968365
D7	5	plc3	0.245422	-0.000292751
D7	6	plc3	0.245541	-0.000248257
D7	7	plc3	0.244436	-0.0014281
D7	8	plc3	0.244066	-0.00187204
D7	9	plc3	0.248408	0.00239522
D7	10	plc3	0.246721	0.000633501
D7	11	plc3	0.247646	0.00148433
D7	12	plc3	0.247158	0.000921717
D7	13	plc3	0.245883	-0.000428209
D7	14	plc3	0.242819	-0.00356587
D7	15	plc3	0.244669	-0.00179067
D7	16	plc3	0.246358	-0.000176323
D7	17	plc3	0.24578	-0.000828637
D7	18	plc3	0.246594	-8.90783e-05
D7	19	plc3	0.246362	-0.000395238
D7	20	plc3	0.250538	0.00370626
D7	21	plc3	0.254334	0.00742727
D7	22	plc3	0.265622	0.0186415
D7	23	plc3	0.28625	0.0391942
D7	24	plc3	0.325925	0.0787954
D7	25	plc3	0.398387	0.151183
D7	26	plc3	0.532516	0.285237
D7	27	plc3	0.752351	0.504997
D7	28	plc3	1.05959	0.812167
D7	29	plc3	1.35835	1.11085
D7	30	plc3	1.5144	1.26682
D7	31	plc3	1.67909	1.43144
D7	32	plc3	1.8372	1.58948
D7	33	plc3	1.97916	1.73136
D7	34	plc3	2.10561	1.85773
D7	35	plc3	2.19576	1.94781
D7	36	plc3	2.27538	2.02735
D7	37	plc3	2.34343	2.09534
D7	38	plc3	2.3984	2.15023
D7	39	plc3	2.44568	2.19743
D7	40	plc3	2.49364	2.24532
D8	1	plc3	0.243347	-0.00118198
D8	2	plc3	0.245674	0.000981847
D8	3	plc3	0.246402	0.00154672
D8	4	plc3	0.245276	0.000258214
D8	5	plc3	0.245534	0.000352716
D8	6	plc3	0.245155	-0.000188734
D8	7	plc3	0.243903	-0.00160379
D8	8	plc3	0.245985	0.000314833
D8	9	plc3	0.245761	-7.1466e-05
D8	10	plc3	0.248548	0.00255175
D8	11	plc3	0.245403	-0.000756341
D8	12	plc3	0.246043	-0.000278656
D8	13	plc3	0.245428	-0.001057
D8	14	plc3	0.243823	-0.0028248
D8	15	plc3	0.245485	-0.00132579
D8	16	plc3	0.247473	0.000499671
D8	17	plc3	0.246474	-0.000662993
D8	18	plc3	0.24662	-0.000679624
D8	19	plc3	0.248091	0.000628562
D8	20	plc3	0.250922	0.00329675
D8	21	plc3	0.253044	0.00525483
D8	22	plc3	0.264993	0.017041
D8	23	plc3	0.28131	0.0331957
D8	24	plc3	0.319128	0.0708504
D8	25	plc3	0.3886	0.14016
D8	26	plc3	0.50974	0.261137
D8	27	plc3	0.714233	0.465466
D8	28	plc3	1.0125	0.763567
D8	29	plc3	1.32339	1.0743
D8	30	plc3	1.49071	1.24145
D8	31	plc3	1.64255	1.39313
D8	32	plc3	1.79746	1.54788
D8	33	plc3	1.94299	1.69325
D8	34	plc3	2.06646	1.81655
D8	35	plc3	2.15632	1.90625
D8	36	plc3	2.22765	1.97741
D8	37	plc3	2.30616	2.05577
D8	38	plc3	2.3569	2.10634
D8	39	plc3	2.39786	2.14714
D8	40	plc3	2.43461	2.18373
D9	1	plc3	0.283132	-0.0031024
D9	2	plc3	0.284887	-0.00150559
D9	3	plc3	0.287958	0.00140652
D9	4	plc3	0.289033	0.00232289
D9	5	plc3	0.286979	0.000110544
D9	6	plc3	0.290624	0.0035973
D9	7	plc3	0.285771	-0.00141488
D9	8	plc3	0.285206	-0.00213755
D9	9	plc3	0.286138	-0.00136433
D9	10	plc3	0.287828	0.00016647
D9	11	plc3	0.287293	-0.000526221
D9	12	plc3	0.28576	-0.00221792
D9	13	plc3	0.287834	-0.000302429
D9	14	plc3	0.287836	-0.000459424
D9	15	plc3	0.28813	-0.000323373
D9	16	plc3	0.286012	-0.00259979
D9	17	plc3	0.289293	0.000522573
D9	18	plc3	0.2847	-0.00422908
D9	19	plc3	0.287922	-0.00116602
D9	20	plc3	0.289576	0.000329702
D9	21	plc3	0.29769	0.00828502
D9	22	plc3	0.30722	0.017657
D9	23	plc3	0.323549	0.0338268
D9	24	plc3	0.353993	0.0641131
D9	25	plc3	0.414098	0.124059
D9	26	plc3	0.524308	0.234111
D9	27	plc3	0.719082	0.428727
D9	28	plc3	0.994685	0.704171
D9	29	plc3	1.2926	1.00193
D9	30	plc3	1.46005	1.16922
D9	31	plc3	1.6111	1.32011
D9	32	plc3	1.76667	1.47553
D9	33	plc3	1.9045	1.61319
D9	34	plc3	2.03607	1.74461
D9	35	plc3	2.13416	1.84253
D9	36	plc3	2.21922	1.92744
D9	37	plc3	2.29143	1.99949
D9	38	plc3	2.34322	2.05112
D9	39	plc3	2.39204	2.09978
D9	40	plc3	2.44092	2.1485
D10	1	spx16	0.39313	-0.000115415
D10	2	spx16	0.395933	0.00215374
D10	3	spx16	0.396604	0.00229099
D10	4	spx16	0.39653	0.00168282
D10	5	spx16	0.397254	0.00187288
D10	6	spx16	0.395316	-0.00059954
D10	7	spx16	0.397325	0.000875803
D10	8	spx16	0.395078	-0.00190519
D10	9	spx16	0.397955	0.000437696
D10	10	spx16	0.394704	-0.00334788
D10	11	spx16	0.396818	-0.0017673
D10	12	spx16	0.396407	-0.00271307
D10	13	spx16	0.397219	-0.00243459
D10	14	spx16	0.397447	-0.00274116
D10	15	spx16	0.39989	-0.00083201
D10	16	spx16	0.403543	0.00228702
D10	17	spx16	0.408684	0.00689351
D10	18	spx16	0.417953	0.0156286
D10	19	spx16	0.441703	0.038845
D10	20	spx16	0.484598	0.081205
D10	21	spx16	0.568465	0.164539
D10	22	spx16	0.714128	0.309667
D10	23	spx16	0.956009	0.551014
D10	24	spx16	1.2873	0.881769
D10	25	spx16	1.65034	1.24428
D10	26	spx16	1.90112	1.49452
D10	27	spx16	2.09869	1.69155
D10	28	spx16	2.2354	1.82774
D10	29	spx16	2.35772	1.94952
D10	30	spx16	2.44986	2.04113
D10	31	spx16	2.52172	2.11245
D10	32	spx16	2.5877	2.17789
D10	33	spx16	2.64034	2.23
D10	34	spx16	2.68248	2.27161
D10	35	spx16	2.7131	2.30169
D10	36	spx16	2.73518	2.32325
D10	37	spx16	2.7689	2.35643
D10	38	spx16	2.7794	2.36639
D10	39	spx16	2.7944	2.38086
D10	40	spx16	2.8138	2.39973
D11	1	spx16	0.319293	-0.00483201
D11	2	spx16	0.322441	-0.00182988
D11	3	spx16	0.325555	0.00113902
D11	4	spx16	0.326284	0.00172234
D11	5	spx16	0.323204	-0.00150302
D11	6	spx16	0.324391	-0.000460654
D11	7	spx16	0.324283	-0.000713947
D11	8	spx16	0.326605	0.00146227
D11	9	spx16	0.325868	0.000579855
D11	10	spx16	0.323487	-0.00194613
D11	11	spx16	0.323856	-0.00172301
D11	12	spx16	0.325646	-7.7713e-05
D11	13	spx16	0.324909	-0.000960729
D11	14	spx16	0.325273	-0.000742371
D11	15	spx16	0.327463	0.00130227
D11	16	spx16	0.328228	0.0019218
D11	17	spx16	0.33503	0.00857865
D11	18	spx16	0.348135	0.0215381
D11	19	spx16	0.368995	0.0422532
D11	20	spx16	0.411671	0.0847836
D11	21	spx16	0.494367	0.167334
D11	22	spx16	0.640901	0.313723
D11	23	spx16	0.881104	0.55378
D11	24	spx16	1.21941	0.891937
D11	25	spx16	1.59637	1.26876
D11	26	spx16	1.86388	1.53612
D11	27	spx16	2.0613	1.73339
D11	28	spx16	2.19661	1.86856
D11	29	spx16	2.31901	1.99081
D11	30	spx16	2.42124	2.0929
D11	31	spx16	2.49925	2.17076
D11	32	spx16	2.55802	2.22939
D11	33	spx16	2.61403	2.28525
D11	34	spx16	2.64899	2.32007
D11	35	spx16	2.68583	2.35676
D11	36	spx16	2.7026	2.37338
D11	37	spx16	2.7377	2.40835
D11	38	spx16	2.74309	2.41358
D11	39	spx16	2.75901	2.42936
D11	40	spx16	2.77497	2.44517
D12	1	spx16	0.825041	-0.0192331
D12	2	spx16	0.837193	-0.0122241
D12	3	spx16	0.847547	-0.00701365
D12	4	spx16	0.853193	-0.00651023
D12	5	spx16	0.863506	-0.00133995
D12	6	spx16	0.871928	0.00193937
D12	7	spx16	0.880096	0.00496382
D12	8	spx16	0.883061	0.00278562
D12	9	spx16	0.892085	0.0066676
D12	10	spx16	0.895923	0.00536243
D12	11	spx16	0.899385	0.00368104
D12	12	spx16	0.904439	0.00359192
D12	13	spx16	0.904717	-0.00127212
D12	14	spx16	0.908976	-0.00215618
D12	15	spx16	0.91047	-0.00580536
D12	16	spx16	0.916524	-0.00489431
D12	17	spx16	0.925105	-0.00145591
D12	18	spx16	0.93803	0.00632547
D12	19	spx16	0.960988	0.0241405
D12	20	spx16	1.00461	0.0626219
D12	21	spx16	1.08984	0.142707
D12	22	spx16	1.23211	0.279833
D12	23	spx16	1.46338	0.505966
D12	24	spx16	1.78415	0.821586
D12	25	spx16	2.12265	1.15495
D12	26	spx16	2.3481	1.37525
D12	27	spx16	2.52707	1.54908
D12	28	spx16	2.64274	1.65961
D12	29	spx16	2.75242	1.76414
D12	30	spx16	2.84867	1.85525
D12	31	spx16	2.91757	1.919
D12	32	spx16	2.96526	1.96156
D12	33	spx16	3.01308	2.00423
D12	34	spx16	3.03633	2.02234
D12	35	spx16	3.07058	2.05145
D12	36	spx16	3.09399	2.06971
D12	37	spx16	3.10794	2.07852
D12	38	spx16	3.13472	2.10016
D12	39	spx16	3.13984	2.10014
D12	40	spx16	3.16272	2.11787
E1	1	plc1	0.34505	-0.00295306
E1	2	plc1	0.348389	-0.000528423
E1	3	plc1	0.345178	-0.00465299
E1	4	plc1	0.349937	-0.000809047
E1	5	plc1	0.355157	0.00349722
E1	6	plc1	0.356193	0.00361862
E1	7	plc1	0.353972	0.000483814
E1	8	plc1	0.356255	0.00185202
E1	9	plc1	0.354419	-0.000898631
E1	10	plc1	0.356959	0.000727634
E1	11	plc1	0.355224	-0.00192196
E1	12	plc1	0.357483	-0.000577683
E1	13	plc1	0.358806	-0.000168693
E1	14	plc1	0.361115	0.00122651
E1	15	plc1	0.359016	-0.00178685
E1	16	plc1	0.358394	-0.0033232
E1	17	plc1	0.360821	-0.0018112
E1	18	plc1	0.365425	0.00187846
E1	19	plc1	0.367126	0.00266597
E1	20	plc1	0.375389	0.0100143
E1	21	plc1	0.396096	0.0298066
E1	22	plc1	0.424432	0.0572288
E1	23	plc1	0.488376	0.120258
E1	24	plc1	0.597513	0.228481
E1	25	plc1	0.787262	0.417316
E1	26	plc1	1.08267	0.711809
E1	27	plc1	1.45947	1.0877
E1	28	plc1	1.75042	1.37773
E1	29	plc1	1.92385	1.55025
E1	30	plc1	2.08016	1.70564
E1	31	plc1	2.2203	1.84487
E1	32	plc1	2.33613	1.95978
E1	33	plc1	2.42616	2.04889
E1	34	plc1	2.48434	2.10616
E1	35	plc1	2.53927	2.16018
E1	36	plc1	2.5874	2.20739
E1	37	plc1	2.62191	2.24099
E1	38	plc1	2.65698	2.27515
E1	39	plc1	2.69079	2.30804
E1	40	plc1	2.707	2.32334
E2	1	plc1	0.35408	-0.000468086
E2	2	plc1	0.355396	0.000656314
E2	3	plc1	0.355993	0.00106143
E2	4	plc1	0.35697	0.00184648
E2	5	plc1	0.352848	-0.00246671
E2	6	plc1	0.355976	0.000469436
E2	7	plc1	0.358963	0.00326458
E2	8	plc1	0.356648	0.000757839
E2	9	plc1	0.357746	0.00166489
E2	10	plc1	0.355905	-0.000368117
E2	11	plc1	0.355444	-0.00102017
E2	12	plc1	0.355254	-0.00140264
E2	13	plc1	0.353871	-0.00297684
E2	14	plc1	0.351432	-0.00560768
E2	15	plc1	0.353822	-0.00340941
E2	16	plc1	0.358019	0.000596155
E2	17	plc1	0.355415	-0.00219914
E2	18	plc1	0.360837	0.00303083
E2	19	plc1	0.364757	0.00675906
E2	20	plc1	0.368106	0.00991684
E2	21	plc1	0.385776	0.0273954
E2	22	plc1	0.409957	0.0513847
E2	23	plc1	0.46371	0.104945
E2	24	plc1	0.556346	0.197391
E2	25	plc1	0.730638	0.371491
E2	26	plc1	0.992399	0.63306
E2	27	plc1	1.33347	0.973936
E2	28	plc1	1.62793	1.26821
E2	29	plc1	1.81475	1.45484
E2	30	plc1	1.96631	1.6062
E2	31	plc1	2.0989	1.73861
E2	32	plc1	2.20957	1.84908
E2	33	plc1	2.29206	1.93138
[truncated: 1,847 more rows]

## Sheet: BioGroup Analysis Result
Block Type	96alum
Chemistry	SYBR_GREEN
Experiment File Name	D:\ShuJu\LZM\16+actin + plc 1-3 zuzhi.eds
Experiment Run End Time	2023-07-14 11:23:36 AM CST
Instrument Type	sds7500
Passive Reference	ROX
Biogroup Name	Target Name	Task	RQ	RQ Min	RQ Max	Cт Mean	ΔCт Mean	ΔCт SE	ΔΔCт
Analysis Type	Singleplex
Endogenous Control	plc1
RQ Min/Max Confidence Level	95.0
Reference Biogroup Name

## Sheet: Technical Analysis Result
Block Type	96alum
Chemistry	SYBR_GREEN
Experiment File Name	D:\ShuJu\LZM\16+actin + plc 1-3 zuzhi.eds
Experiment Run End Time	2023-07-14 11:23:36 AM CST
Instrument Type	sds7500
Passive Reference	ROX
Sample Name	Target Name	Task	RQ	RQ Min	RQ Max	Cт Mean	ΔCт Mean	ΔCт SE	ΔΔCт
root	plc2	UNKNOWN	1	0.687193	1.4552	24.8981	-0.18623	0.19493	0
root	plc3	UNKNOWN	1	0.671241	1.48978	26.4498	1.36545	0.207134	0
root	spx16	UNKNOWN	1	0.644376	1.55189	26.4664	1.38198	0.228359	0
strem	plc2	UNKNOWN	0.217913	0.173433	0.273802	25.9427	2.01194	0.118634	2.19817
strem	plc3	UNKNOWN	0.211048	0.191535	0.232549	27.5406	3.60981	0.0504116	2.24436
strem	spx16	UNKNOWN	0.181558	0.155884	0.211459	27.7742	3.84348	0.0792202	2.4615
leafe	plc2	UNKNOWN	0.209008	0.161422	0.270621	25.3952	2.07214	0.134243	2.25837
leafe	plc3	UNKNOWN	0.109543	0.0824268	0.145578	27.8789	4.55589	0.147781	3.19044
leafe	spx16	UNKNOWN	0.122105	0.10902	0.136761	27.7388	4.41579	0.0589001	3.03381
flower	plc2	UNKNOWN	0.132186	0.120045	0.145554	25.238	2.73313	0.0500602	2.91936
flower	plc3	UNKNOWN	0.246203	0.207674	0.291881	25.8924	3.38753	0.0884323	2.02208
flower	spx16	UNKNOWN	3.18843	2.76622	3.67507	22.214	-0.290863	0.0738092	-1.67284
fruit	plc2	UNKNOWN	0.359639	0.290186	0.445716	25.885	1.28915	0.1115	1.47538
fruit	plc3	UNKNOWN	0.264614	0.224266	0.31222	27.8793	3.28349	0.0859647	1.91804
fruit	spx16	UNKNOWN	0.261971	0.226116	0.303511	27.9103	3.3145	0.0764804	1.93252
seed	plc2	UNKNOWN	0.297199	0.268467	0.329005	23.8518	1.56427	0.0528313	1.7505
seed	plc3	UNKNOWN	0.236736	0.108836	0.514939	25.7316	3.4441	0.403798	2.07865
seed	spx16	UNKNOWN	0.235464	0.194035	0.28574	25.7559	3.4684	0.100559	2.08642
root	actin	UNKNOWN	1	0.660008	1.51513	20.6521	-4.43224	0.215903	0
strem	actin	UNKNOWN	0.451239	0.40976	0.496916	20.6465	-3.28421	0.050104	1.14804
leafe	actin	UNKNOWN	0.311487	0.273981	0.354126	20.5735	-2.74949	0.0666662	1.68276
flower	actin	UNKNOWN	0.348062	0.298002	0.40653	19.5952	-2.90966	0.0806859	1.52259
fruit	actin	UNKNOWN	2.6436	2.23335	3.12921	18.7611	-5.83475	0.0876274	-1.40251
seed	actin	UNKNOWN	0.0125116	3.91546e-07	399.801	24.1759	1.88834	5.38953	6.32059
Analysis Type	Singleplex
Endogenous Control	plc1
RQ Min/Max Confidence Level	95.0
Reference Sample	root
