# Supplementary material for: Genome-wide identification and characterization of SPXdomain-containing genes family in eggplant
Source: PeerJ journal article supplement (doi:10.7717/peerj.17341), 2024-05-28
Supplement: 16SPX_IAA+LP.zip [file 5-8 spx iaa lp.xls]

## Sheet: Sample Setup
Block Type	96alum
Chemistry	SYBR_GREEN
Experiment File Name	D:\ShuJu\LZM\spx 5-8 iaa lp.eds
Experiment Run End Time	2023-08-17 02:37:08 AM CST
Instrument Type	sds7500
Passive Reference	ROX
Well	Sample Name	Sample Color	Biogroup Name	Biogroup Color	Target Name	Target Color	Task	Reporter	Quencher	Comments
A1	0d	RGB(132,193,241)			SPX5	RGB(139,189,249)	UNKNOWN	SYBR	None
A2	0d	RGB(132,193,241)			SPX5	RGB(139,189,249)	UNKNOWN	SYBR	None
A3	0d	RGB(132,193,241)			SPX5	RGB(139,189,249)	UNKNOWN	SYBR	None
A4	0d	RGB(132,193,241)			SPX6	RGB(208,243,98)	UNKNOWN	SYBR	None
A5	0d	RGB(132,193,241)			SPX6	RGB(208,243,98)	UNKNOWN	SYBR	None
A6	0d	RGB(132,193,241)			SPX6	RGB(208,243,98)	UNKNOWN	SYBR	None
A7	0d	RGB(132,193,241)			SPX7	RGB(244,165,230)	UNKNOWN	SYBR	None
A8	0d	RGB(132,193,241)			SPX7	RGB(244,165,230)	UNKNOWN	SYBR	None
A9	0d	RGB(132,193,241)			SPX7	RGB(244,165,230)	UNKNOWN	SYBR	None
A10	0d	RGB(132,193,241)			SPX8	RGB(255,191,168)	UNKNOWN	SYBR	None
A11	0d	RGB(132,193,241)			SPX8	RGB(255,191,168)	UNKNOWN	SYBR	None
A12	0d	RGB(132,193,241)			SPX8	RGB(255,191,168)	UNKNOWN	SYBR	None
B1	1d lp	RGB(168,255,222)			SPX5	RGB(139,189,249)	UNKNOWN	SYBR	None
B2	1d lp	RGB(168,255,222)			SPX5	RGB(139,189,249)	UNKNOWN	SYBR	None
B3	1d lp	RGB(168,255,222)			SPX5	RGB(139,189,249)	UNKNOWN	SYBR	None
B4	1d lp	RGB(168,255,222)			SPX6	RGB(208,243,98)	UNKNOWN	SYBR	None
B5	1d lp	RGB(168,255,222)			SPX6	RGB(208,243,98)	UNKNOWN	SYBR	None
B6	1d lp	RGB(168,255,222)			SPX6	RGB(208,243,98)	UNKNOWN	SYBR	None
B7	1d lp	RGB(168,255,222)			SPX7	RGB(244,165,230)	UNKNOWN	SYBR	None
B8	1d lp	RGB(168,255,222)			SPX7	RGB(244,165,230)	UNKNOWN	SYBR	None
B9	1d lp	RGB(168,255,222)			SPX7	RGB(244,165,230)	UNKNOWN	SYBR	None
B10	1d lp	RGB(168,255,222)			SPX8	RGB(255,191,168)	UNKNOWN	SYBR	None
B11	1d lp	RGB(168,255,222)			SPX8	RGB(255,191,168)	UNKNOWN	SYBR	None
B12	1d lp	RGB(168,255,222)			SPX8	RGB(255,191,168)	UNKNOWN	SYBR	None
C1	1d lp+iaa	RGB(223,221,142)			SPX5	RGB(139,189,249)	UNKNOWN	SYBR	None
C2	1d lp+iaa	RGB(223,221,142)			SPX5	RGB(139,189,249)	UNKNOWN	SYBR	None
C3	1d lp+iaa	RGB(223,221,142)			SPX5	RGB(139,189,249)	UNKNOWN	SYBR	None
C4	1d lp+iaa	RGB(223,221,142)			SPX6	RGB(208,243,98)	UNKNOWN	SYBR	None
C5	1d lp+iaa	RGB(223,221,142)			SPX6	RGB(208,243,98)	UNKNOWN	SYBR	None
C6	1d lp+iaa	RGB(223,221,142)			SPX6	RGB(208,243,98)	UNKNOWN	SYBR	None
C7	1d lp+iaa	RGB(223,221,142)			SPX7	RGB(244,165,230)	UNKNOWN	SYBR	None
C8	1d lp+iaa	RGB(223,221,142)			SPX7	RGB(244,165,230)	UNKNOWN	SYBR	None
C9	1d lp+iaa	RGB(223,221,142)			SPX7	RGB(244,165,230)	UNKNOWN	SYBR	None
C10	1d lp+iaa	RGB(223,221,142)			SPX8	RGB(255,191,168)	UNKNOWN	SYBR	None
C11	1d lp+iaa	RGB(223,221,142)			SPX8	RGB(255,191,168)	UNKNOWN	SYBR	None
C12	1d lp+iaa	RGB(223,221,142)			SPX8	RGB(255,191,168)	UNKNOWN	SYBR	None
D1	5d lp	RGB(247,255,168)			SPX5	RGB(139,189,249)	UNKNOWN	SYBR	None
D2	5d lp	RGB(247,255,168)			SPX5	RGB(139,189,249)	UNKNOWN	SYBR	None
D3	5d lp	RGB(247,255,168)			SPX5	RGB(139,189,249)	UNKNOWN	SYBR	None
D4	5d lp	RGB(247,255,168)			SPX6	RGB(208,243,98)	UNKNOWN	SYBR	None
D5	5d lp	RGB(247,255,168)			SPX6	RGB(208,243,98)	UNKNOWN	SYBR	None
D6	5d lp	RGB(247,255,168)			SPX6	RGB(208,243,98)	UNKNOWN	SYBR	None
D7	5d lp	RGB(247,255,168)			SPX7	RGB(244,165,230)	UNKNOWN	SYBR	None
D8	5d lp	RGB(247,255,168)			SPX7	RGB(244,165,230)	UNKNOWN	SYBR	None
D9	5d lp	RGB(247,255,168)			SPX7	RGB(244,165,230)	UNKNOWN	SYBR	None
D10	5d lp	RGB(247,255,168)			SPX8	RGB(255,191,168)	UNKNOWN	SYBR	None
D11	5d lp	RGB(247,255,168)			SPX8	RGB(255,191,168)	UNKNOWN	SYBR	None
D12	5d lp	RGB(247,255,168)			SPX8	RGB(255,191,168)	UNKNOWN	SYBR	None
E1	5d lp+iaa	RGB(180,255,0)			SPX5	RGB(139,189,249)	UNKNOWN	SYBR	None
E2	5d lp+iaa	RGB(180,255,0)			SPX5	RGB(139,189,249)	UNKNOWN	SYBR	None
E3	5d lp+iaa	RGB(180,255,0)			SPX5	RGB(139,189,249)	UNKNOWN	SYBR	None
E4	5d lp+iaa	RGB(180,255,0)			SPX6	RGB(208,243,98)	UNKNOWN	SYBR	None
E5	5d lp+iaa	RGB(180,255,0)			SPX6	RGB(208,243,98)	UNKNOWN	SYBR	None
E6	5d lp+iaa	RGB(180,255,0)			SPX6	RGB(208,243,98)	UNKNOWN	SYBR	None
E7	5d lp+iaa	RGB(180,255,0)			SPX7	RGB(244,165,230)	UNKNOWN	SYBR	None
E8	5d lp+iaa	RGB(180,255,0)			SPX7	RGB(244,165,230)	UNKNOWN	SYBR	None
E9	5d lp+iaa	RGB(180,255,0)			SPX7	RGB(244,165,230)	UNKNOWN	SYBR	None
E10	5d lp+iaa	RGB(180,255,0)			SPX8	RGB(255,191,168)	UNKNOWN	SYBR	None
E11	5d lp+iaa	RGB(180,255,0)			SPX8	RGB(255,191,168)	UNKNOWN	SYBR	None
E12	5d lp+iaa	RGB(180,255,0)			SPX8	RGB(255,191,168)	UNKNOWN	SYBR	None
F1	10d lp	RGB(255,204,153)			SPX5	RGB(139,189,249)	UNKNOWN	SYBR	None
F2	10d lp	RGB(255,204,153)			SPX5	RGB(139,189,249)	UNKNOWN	SYBR	None
F3	10d lp	RGB(255,204,153)			SPX5	RGB(139,189,249)	UNKNOWN	SYBR	None
F4	10d lp	RGB(255,204,153)			SPX6	RGB(208,243,98)	UNKNOWN	SYBR	None
F5	10d lp	RGB(255,204,153)			SPX6	RGB(208,243,98)	UNKNOWN	SYBR	None
F6	10d lp	RGB(255,204,153)			SPX6	RGB(208,243,98)	UNKNOWN	SYBR	None
F7	10d lp	RGB(255,204,153)			SPX7	RGB(244,165,230)	UNKNOWN	SYBR	None
F8	10d lp	RGB(255,204,153)			SPX7	RGB(244,165,230)	UNKNOWN	SYBR	None
F9	10d lp	RGB(255,204,153)			SPX7	RGB(244,165,230)	UNKNOWN	SYBR	None
F10	10d lp	RGB(255,204,153)			SPX8	RGB(255,191,168)	UNKNOWN	SYBR	None
F11	10d lp	RGB(255,204,153)			SPX8	RGB(255,191,168)	UNKNOWN	SYBR	None
F12	10d lp	RGB(255,204,153)			SPX8	RGB(255,191,168)	UNKNOWN	SYBR	None
G1	10d lp+iaa	RGB(253,138,88)			SPX5	RGB(139,189,249)	UNKNOWN	SYBR	None
G2	10d lp+iaa	RGB(253,138,88)			SPX5	RGB(139,189,249)	UNKNOWN	SYBR	None
G3	10d lp+iaa	RGB(253,138,88)			SPX5	RGB(139,189,249)	UNKNOWN	SYBR	None
G4	10d lp+iaa	RGB(253,138,88)			SPX6	RGB(208,243,98)	UNKNOWN	SYBR	None
G5	10d lp+iaa	RGB(253,138,88)			SPX6	RGB(208,243,98)	UNKNOWN	SYBR	None
G6	10d lp+iaa	RGB(253,138,88)			SPX6	RGB(208,243,98)	UNKNOWN	SYBR	None
G7	10d lp+iaa	RGB(253,138,88)			SPX7	RGB(244,165,230)	UNKNOWN	SYBR	None
G8	10d lp+iaa	RGB(253,138,88)			SPX7	RGB(244,165,230)	UNKNOWN	SYBR	None
G9	10d lp+iaa	RGB(253,138,88)			SPX7	RGB(244,165,230)	UNKNOWN	SYBR	None
G10	10d lp+iaa	RGB(253,138,88)			SPX8	RGB(255,191,168)	UNKNOWN	SYBR	None
G11	10d lp+iaa	RGB(253,138,88)			SPX8	RGB(255,191,168)	UNKNOWN	SYBR	None
G12	10d lp+iaa	RGB(253,138,88)			SPX8	RGB(255,191,168)	UNKNOWN	SYBR	None
H1	5d lp+iaa	RGB(180,255,0)			ACTIN	RGB(243,124,98)	UNKNOWN	SYBR	None
H2	5d lp+iaa	RGB(180,255,0)			ACTIN	RGB(243,124,98)	UNKNOWN	SYBR	None
H3	5d lp+iaa	RGB(180,255,0)			ACTIN	RGB(243,124,98)	UNKNOWN	SYBR	None
H4	10d lp	RGB(255,204,153)			ACTIN	RGB(243,124,98)	UNKNOWN	SYBR	None
H5	10d lp	RGB(255,204,153)			ACTIN	RGB(243,124,98)	UNKNOWN	SYBR	None
H6	10d lp	RGB(255,204,153)			ACTIN	RGB(243,124,98)	UNKNOWN	SYBR	None
H7	10d lp+iaa	RGB(253,138,88)			ACTIN	RGB(243,124,98)	UNKNOWN	SYBR	None
H8	10d lp+iaa	RGB(253,138,88)			ACTIN	RGB(243,124,98)	UNKNOWN	SYBR	None
H9	10d lp+iaa	RGB(253,138,88)			ACTIN	RGB(243,124,98)	UNKNOWN	SYBR	None
H10
H11
H12

## Sheet: Results
Block Type	96alum
Chemistry	SYBR_GREEN
Experiment File Name	D:\ShuJu\LZM\spx 5-8 iaa lp.eds
Experiment Run End Time	2023-08-17 02:37:08 AM CST
Instrument Type	sds7500
Passive Reference	ROX
Well	Sample Name	Target Name	Task	Reporter	Quencher	RQ	RQ Min	RQ Max	Cт	Cт Mean	Cт SD	ΔCт	ΔCт Mean	ΔCт SE	HK Control ΔCт Mean	HK Control ΔCт SE	ΔΔCт	Automatic Ct Threshold	Ct Threshold	Automatic Baseline	Baseline Start	Baseline End	Efficiency	Tm1	Tm2	Tm3	Comments	HIGHSD	NOAMP	EXPFAIL
A1	0d	SPX5	UNKNOWN	SYBR	None				25.8889	25.6166	0.249948							TRUE	0.240359	TRUE	3	21	1	78.4322				N	N	N
A2	0d	SPX5	UNKNOWN	SYBR	None				25.5633	25.6166	0.249948							TRUE	0.240359	TRUE	3	20	1	78.6232				N	N	N
A3	0d	SPX5	UNKNOWN	SYBR	None				25.3976	25.6166	0.249948							TRUE	0.240359	TRUE	3	19	1	78.6232				N	N	N
A4	0d	SPX6	UNKNOWN	SYBR	None	1	0.700033	1.42851	31.3684	31.5383	0.201362		5.9217	0.185311			0	TRUE	0.180793	TRUE	3	26	1	78.6232				N	N	N
A5	0d	SPX6	UNKNOWN	SYBR	None	1	0.700033	1.42851	31.7607	31.5383	0.201362		5.9217	0.185311			0	TRUE	0.180793	TRUE	3	27	1	78.6232				N	N	N
A6	0d	SPX6	UNKNOWN	SYBR	None	1	0.700033	1.42851	31.4858	31.5383	0.201362		5.9217	0.185311			0	TRUE	0.180793	TRUE	3	26	1	78.6232				N	N	N
A7	0d	SPX7	UNKNOWN	SYBR	None	1	0.693641	1.44167	27.5997	27.8442	0.214275		2.22764	0.190077			0	TRUE	0.270064	TRUE	3	22	1	80.5328				N	N	N
A8	0d	SPX7	UNKNOWN	SYBR	None	1	0.693641	1.44167	27.9989	27.8442	0.214275		2.22764	0.190077			0	TRUE	0.270064	TRUE	3	23	1	80.5328				N	N	N
A9	0d	SPX7	UNKNOWN	SYBR	None	1	0.693641	1.44167	27.9341	27.8442	0.214275		2.22764	0.190077			0	TRUE	0.270064	TRUE	3	22	1	80.3418				N	N	N
A10	0d	SPX8	UNKNOWN	SYBR	None	1			Undetermined	35.7037			10.0871				0	TRUE	0.0182747	TRUE	3	39	1	62.2006				N	Y	Y
A11	0d	SPX8	UNKNOWN	SYBR	None	1			Undetermined	35.7037			10.0871				0	TRUE	0.0182747	TRUE	3	39	1	62.2006				N	Y	Y
A12	0d	SPX8	UNKNOWN	SYBR	None	1			35.7037	35.7037			10.0871				0	TRUE	0.0182747	TRUE	3	34	1	79.578				N	N	N
B1	1d lp	SPX5	UNKNOWN	SYBR	None				26.23	25.9127	0.291141							TRUE	0.240359	TRUE	3	21	1	78.6232				N	N	N
B2	1d lp	SPX5	UNKNOWN	SYBR	None				25.8501	25.9127	0.291141							TRUE	0.240359	TRUE	3	21	1	78.8141				N	N	N
B3	1d lp	SPX5	UNKNOWN	SYBR	None				25.6579	25.9127	0.291141							TRUE	0.240359	TRUE	3	20	1	78.8141				N	N	N
B4	1d lp	SPX6	UNKNOWN	SYBR	None	0.68694	0.473754	0.996056	32.2026	32.3761	0.164508		6.46345	0.193068			0.541745	TRUE	0.180793	TRUE	3	27	1	78.8141				N	N	N
B5	1d lp	SPX6	UNKNOWN	SYBR	None	0.68694	0.473754	0.996056	32.3959	32.3761	0.164508		6.46345	0.193068			0.541745	TRUE	0.180793	TRUE	3	28	1	78.8141				N	N	N
B6	1d lp	SPX6	UNKNOWN	SYBR	None	0.68694	0.473754	0.996056	32.5298	32.3761	0.164508		6.46345	0.193068			0.541745	TRUE	0.180793	TRUE	3	28	1	78.8141				N	N	N
B7	1d lp	SPX7	UNKNOWN	SYBR	None	0.686491	0.489355	0.963043	28.7133	28.683	0.0897367		2.77032	0.175894			0.542687	TRUE	0.270064	TRUE	3	23	1	80.7237				N	N	N
B8	1d lp	SPX7	UNKNOWN	SYBR	None	0.686491	0.489355	0.963043	28.582	28.683	0.0897367		2.77032	0.175894			0.542687	TRUE	0.270064	TRUE	3	22	1	80.7237				N	N	N
B9	1d lp	SPX7	UNKNOWN	SYBR	None	0.686491	0.489355	0.963043	28.7537	28.683	0.0897367		2.77032	0.175894			0.542687	TRUE	0.270064	TRUE	3	23	1	80.7237				N	N	N
B10	1d lp	SPX8	UNKNOWN	SYBR	None				Undetermined									TRUE	0.0182747	TRUE	3	39	1	61.8186				N	Y	Y
B11	1d lp	SPX8	UNKNOWN	SYBR	None				Undetermined									TRUE	0.0182747	TRUE	3	39	1	62.0096				N	Y	Y
B12	1d lp	SPX8	UNKNOWN	SYBR	None				Undetermined									TRUE	0.0182747	TRUE	3	39	1	61.8186				N	Y	Y
C1	1d lp+iaa	SPX5	UNKNOWN	SYBR	None				26.2513	26.2131	0.0508946							TRUE	0.240359	TRUE	3	21	1	78.8141				N	N	N
C2	1d lp+iaa	SPX5	UNKNOWN	SYBR	None				26.2327	26.2131	0.0508946							TRUE	0.240359	TRUE	3	21	1	79.0051				N	N	N
C3	1d lp+iaa	SPX5	UNKNOWN	SYBR	None				26.1553	26.2131	0.0508946							TRUE	0.240359	TRUE	3	21	1	79.0051				N	N	N
C4	1d lp+iaa	SPX6	UNKNOWN	SYBR	None	4.06716	2.37061	6.97785	29.8021	30.1108	0.483147		3.89768	0.280489			-2.02402	TRUE	0.180793	TRUE	3	25	1	79.0051				N	N	N
C5	1d lp+iaa	SPX6	UNKNOWN	SYBR	None	4.06716	2.37061	6.97785	29.8627	30.1108	0.483147		3.89768	0.280489			-2.02402	TRUE	0.180793	TRUE	3	25	1	79.0051				N	N	N
C6	1d lp+iaa	SPX6	UNKNOWN	SYBR	None	4.06716	2.37061	6.97785	30.6676	30.1108	0.483147		3.89768	0.280489			-2.02402	TRUE	0.180793	TRUE	3	26	1	79.0051				N	N	N
C7	1d lp+iaa	SPX7	UNKNOWN	SYBR	None	1.20707	0.951814	1.53077	28.3891	28.1692	0.207678		1.95613	0.123451			-0.271507	TRUE	0.270064	TRUE	3	23	1	80.9147				N	N	N
C8	1d lp+iaa	SPX7	UNKNOWN	SYBR	None	1.20707	0.951814	1.53077	28.1421	28.1692	0.207678		1.95613	0.123451			-0.271507	TRUE	0.270064	TRUE	3	23	1	80.9147				N	N	N
C9	1d lp+iaa	SPX7	UNKNOWN	SYBR	None	1.20707	0.951814	1.53077	27.9765	28.1692	0.207678		1.95613	0.123451			-0.271507	TRUE	0.270064	TRUE	3	22	1	80.9147				N	N	N
C10	1d lp+iaa	SPX8	UNKNOWN	SYBR	None				Undetermined									TRUE	0.0182747	TRUE	3	39	1	61.8186				N	Y	Y
C11	1d lp+iaa	SPX8	UNKNOWN	SYBR	None				Undetermined									TRUE	0.0182747	TRUE	3	39	1	62.0096				N	Y	Y
C12	1d lp+iaa	SPX8	UNKNOWN	SYBR	None				Undetermined									TRUE	0.0182747	TRUE	3	39	1	62.0096				N	Y	Y
D1	5d lp	SPX5	UNKNOWN	SYBR	None				23.8116	23.9	0.0894465							TRUE	0.240359	TRUE	3	19	1	79.0051				N	N	N
D2	5d lp	SPX5	UNKNOWN	SYBR	None				23.9904	23.9	0.0894465							TRUE	0.240359	TRUE	3	18	1	79.0051				N	N	N
D3	5d lp	SPX5	UNKNOWN	SYBR	None				23.8981	23.9	0.0894465							TRUE	0.240359	TRUE	3	19	1	79.196				N	N	N
D4	5d lp	SPX6	UNKNOWN	SYBR	None	2.43048	1.51772	3.89216	28.2896	28.5405	0.414246		4.64046	0.244677			-1.28124	TRUE	0.180793	TRUE	3	23	1	79.196				N	N	N
D5	5d lp	SPX6	UNKNOWN	SYBR	None	2.43048	1.51772	3.89216	28.3133	28.5405	0.414246		4.64046	0.244677			-1.28124	TRUE	0.180793	TRUE	3	24	1	79.196				N	N	N
D6	5d lp	SPX6	UNKNOWN	SYBR	None	2.43048	1.51772	3.89216	29.0186	28.5405	0.414246		4.64046	0.244677			-1.28124	TRUE	0.180793	TRUE	3	24	1	79.196				N	N	N
D7	5d lp	SPX7	UNKNOWN	SYBR	None	0.498663	0.366466	0.67855	27.0211	27.1315	0.2624		3.2315	0.160057			1.00386	TRUE	0.270064	TRUE	3	21	1	81.1057				N	N	N
D8	5d lp	SPX7	UNKNOWN	SYBR	None	0.498663	0.366466	0.67855	26.9423	27.1315	0.2624		3.2315	0.160057			1.00386	TRUE	0.270064	TRUE	3	21	1	80.9147				N	N	N
D9	5d lp	SPX7	UNKNOWN	SYBR	None	0.498663	0.366466	0.67855	27.4311	27.1315	0.2624		3.2315	0.160057			1.00386	TRUE	0.270064	TRUE	3	22	1	80.9147				N	N	N
D10	5d lp	SPX8	UNKNOWN	SYBR	None				Undetermined									TRUE	0.0182747	TRUE	3	39	1	61.8186				N	Y	Y
D11	5d lp	SPX8	UNKNOWN	SYBR	None				Undetermined									TRUE	0.0182747	TRUE	3	39	1	61.8186				N	Y	Y
D12	5d lp	SPX8	UNKNOWN	SYBR	None				Undetermined									TRUE	0.0182747	TRUE	3	39	1	61.8186				N	N	Y
E1	5d lp+iaa	SPX5	UNKNOWN	SYBR	None				24.2316	24.2178	0.0340609							TRUE	0.240359	TRUE	3	19	1	79.0051				N	N	N
E2	5d lp+iaa	SPX5	UNKNOWN	SYBR	None				24.2428	24.2178	0.0340609							TRUE	0.240359	TRUE	3	19	1	79.0051				N	N	N
E3	5d lp+iaa	SPX5	UNKNOWN	SYBR	None				24.179	24.2178	0.0340609							TRUE	0.240359	TRUE	3	19	1	79.196				N	N	N
E4	5d lp+iaa	SPX6	UNKNOWN	SYBR	None	3.25996	1.85433	5.7311	27.9276	28.4346	0.506632		4.21684	0.293165			-1.70486	TRUE	0.180793	TRUE	3	23	1	79.196				Y	N	N
E5	5d lp+iaa	SPX6	UNKNOWN	SYBR	None	3.25996	1.85433	5.7311	28.9409	28.4346	0.506632		4.21684	0.293165			-1.70486	TRUE	0.180793	TRUE	3	24	1	79.196				Y	N	N
E6	5d lp+iaa	SPX6	UNKNOWN	SYBR	None	3.25996	1.85433	5.7311	28.4354	28.4346	0.506632		4.21684	0.293165			-1.70486	TRUE	0.180793	TRUE	3	24	1	79.196				Y	N	N
E7	5d lp+iaa	SPX7	UNKNOWN	SYBR	None	0.464474	0.29852	0.722685	27.8232	27.5518	0.396403		3.33397	0.229707			1.10633	TRUE	0.270064	TRUE	3	22	1	80.9147				N	N	N
E8	5d lp+iaa	SPX7	UNKNOWN	SYBR	None	0.464474	0.29852	0.722685	27.0969	27.5518	0.396403		3.33397	0.229707			1.10633	TRUE	0.270064	TRUE	3	22	1	80.9147				N	N	N
E9	5d lp+iaa	SPX7	UNKNOWN	SYBR	None	0.464474	0.29852	0.722685	27.7352	27.5518	0.396403		3.33397	0.229707			1.10633	TRUE	0.270064	TRUE	3	22	1	80.9147				N	N	N
E10	5d lp+iaa	SPX8	UNKNOWN	SYBR	None	0.189972	0.0768501	0.46961	37.1108	36.701	0.579547		12.4832	0.410273			2.39614	TRUE	0.0182747	TRUE	3	35	1	80.3418				Y	N	N
E11	5d lp+iaa	SPX8	UNKNOWN	SYBR	None	0.189972	0.0768501	0.46961	Undetermined	36.701	0.579547		12.4832	0.410273			2.39614	TRUE	0.0182747	TRUE	3	39	1	69.0751				N	Y	Y
E12	5d lp+iaa	SPX8	UNKNOWN	SYBR	None	0.189972	0.0768501	0.46961	36.2912	36.701	0.579547		12.4832	0.410273			2.39614	TRUE	0.0182747	TRUE	3	35	1	79.9599				Y	N	N
F1	10d lp	SPX5	UNKNOWN	SYBR	None				21.0135	20.9208	0.0804345							TRUE	0.240359	TRUE	3	16	1	78.8141				N	N	N
F2	10d lp	SPX5	UNKNOWN	SYBR	None				20.8788	20.9208	0.0804345							TRUE	0.240359	TRUE	3	16	1	79.0051				N	N	N
F3	10d lp	SPX5	UNKNOWN	SYBR	None				20.87	20.9208	0.0804345							TRUE	0.240359	TRUE	3	16	1	79.0051				N	N	N
F4	10d lp	SPX6	UNKNOWN	SYBR	None	0.122972	0.0762317	0.198371	29.5235	29.8661	0.422783		8.9453	0.248472			3.0236	TRUE	0.180793	TRUE	3	25	1	79.0051				N	N	N
F5	10d lp	SPX6	UNKNOWN	SYBR	None	0.122972	0.0762317	0.198371	29.7361	29.8661	0.422783		8.9453	0.248472			3.0236	TRUE	0.180793	TRUE	3	25	1	79.0051				N	N	N
F6	10d lp	SPX6	UNKNOWN	SYBR	None	0.122972	0.0762317	0.198371	30.3386	29.8661	0.422783		8.9453	0.248472			3.0236	TRUE	0.180793	TRUE	3	25	1	79.0051				N	N	N
F7	10d lp	SPX7	UNKNOWN	SYBR	None	0.0597796	0.0509344	0.0701607	27.3296	27.2126	0.119579		6.29184	0.0832041			4.0642	TRUE	0.270064	TRUE	3	22	1	80.9147				N	N	N
F8	10d lp	SPX7	UNKNOWN	SYBR	None	0.0597796	0.0509344	0.0701607	27.2177	27.2126	0.119579		6.29184	0.0832041			4.0642	TRUE	0.270064	TRUE	3	22	1	80.9147				N	N	N
F9	10d lp	SPX7	UNKNOWN	SYBR	None	0.0597796	0.0509344	0.0701607	27.0906	27.2126	0.119579		6.29184	0.0832041			4.0642	TRUE	0.270064	TRUE	3	22	1	80.7237				N	N	N
F10	10d lp	SPX8	UNKNOWN	SYBR	None				Undetermined									TRUE	0.0182747	TRUE	3	39	1	62.0096				N	Y	Y
F11	10d lp	SPX8	UNKNOWN	SYBR	None				Undetermined									TRUE	0.0182747	TRUE	3	39	1	62.0096				N	Y	Y
F12	10d lp	SPX8	UNKNOWN	SYBR	None				Undetermined									TRUE	0.0182747	TRUE	3	39	1	62.0096				N	Y	Y
G1	10d lp+iaa	SPX5	UNKNOWN	SYBR	None				19.7756	19.7007	0.0800526							TRUE	0.240359	TRUE	3	15	1	78.6232				N	N	N
G2	10d lp+iaa	SPX5	UNKNOWN	SYBR	None				19.7102	19.7007	0.0800526							TRUE	0.240359	TRUE	3	14	1	78.8141				N	N	N
G3	10d lp+iaa	SPX5	UNKNOWN	SYBR	None				19.6163	19.7007	0.0800526							TRUE	0.240359	TRUE	3	14	1	78.8141				N	N	N
G4	10d lp+iaa	SPX6	UNKNOWN	SYBR	None	0.158955	0.14262	0.17716	28.218	28.2757	0.0558191		8.57501	0.0563447			2.65331	TRUE	0.180793	TRUE	3	23	1	78.8141				N	N	N
G5	10d lp+iaa	SPX6	UNKNOWN	SYBR	None	0.158955	0.14262	0.17716	28.3294	28.2757	0.0558191		8.57501	0.0563447			2.65331	TRUE	0.180793	TRUE	3	24	1	79.0051				N	N	N
G6	10d lp+iaa	SPX6	UNKNOWN	SYBR	None	0.158955	0.14262	0.17716	28.2798	28.2757	0.0558191		8.57501	0.0563447			2.65331	TRUE	0.180793	TRUE	3	23	1	78.8141				N	N	N
G7	10d lp+iaa	SPX7	UNKNOWN	SYBR	None	0.0330743	0.0248276	0.0440603	26.968	26.8465	0.245397		7.14578	0.149028			4.91814	TRUE	0.270064	TRUE	3	21	1	80.7237				N	N	N
G8	10d lp+iaa	SPX7	UNKNOWN	SYBR	None	0.0330743	0.0248276	0.0440603	27.0073	26.8465	0.245397		7.14578	0.149028			4.91814	TRUE	0.270064	TRUE	3	21	1	80.7237				N	N	N
G9	10d lp+iaa	SPX7	UNKNOWN	SYBR	None	0.0330743	0.0248276	0.0440603	26.564	26.8465	0.245397		7.14578	0.149028			4.91814	TRUE	0.270064	TRUE	3	21	1	80.7237				N	N	N
G10	10d lp+iaa	SPX8	UNKNOWN	SYBR	None	0.0217211			Undetermined	35.3125			15.6119				5.52476	TRUE	0.0182747	TRUE	3	39	1	61.8186				N	Y	Y
G11	10d lp+iaa	SPX8	UNKNOWN	SYBR	None	0.0217211			35.3125	35.3125			15.6119				5.52476	TRUE	0.0182747	TRUE	3	34	1	79.9599				N	N	N
G12	10d lp+iaa	SPX8	UNKNOWN	SYBR	None	0.0217211			Undetermined	35.3125			15.6119				5.52476	TRUE	0.0182747	TRUE	3	39	1	62.0096				N	Y	Y
H1	5d lp+iaa	ACTIN	UNKNOWN	SYBR	None				20.9334	20.9595	0.0657913		-3.25833	0.0427732				TRUE	0.384301	TRUE	3	15	1	80.1508				N	N	N
H2	5d lp+iaa	ACTIN	UNKNOWN	SYBR	None				20.9107	20.9595	0.0657913		-3.25833	0.0427732				TRUE	0.384301	TRUE	3	14	1	80.1508				N	N	N
H3	5d lp+iaa	ACTIN	UNKNOWN	SYBR	None				21.0343	20.9595	0.0657913		-3.25833	0.0427732				TRUE	0.384301	TRUE	3	15	1	80.3418				N	N	N
H4	10d lp	ACTIN	UNKNOWN	SYBR	None				20.5669	20.6242	0.0802426		-0.296586	0.0655962				TRUE	0.384301	TRUE	3	15	1	80.3418				N	N	N
H5	10d lp	ACTIN	UNKNOWN	SYBR	None				20.5898	20.6242	0.0802426		-0.296586	0.0655962				TRUE	0.384301	TRUE	3	14	1	80.3418				N	N	N
H6	10d lp	ACTIN	UNKNOWN	SYBR	None				20.7159	20.6242	0.0802426		-0.296586	0.0655962				TRUE	0.384301	TRUE	3	15	1	80.3418				N	N	N
H7	10d lp+iaa	ACTIN	UNKNOWN	SYBR	None				20.7005	20.6808	0.0488189		0.98009	0.0541347				TRUE	0.384301	TRUE	3	14	1	80.3418				N	N	N
H8	10d lp+iaa	ACTIN	UNKNOWN	SYBR	None				20.6252	20.6808	0.0488189		0.98009	0.0541347				TRUE	0.384301	TRUE	3	15	1	80.3418				N	N	N
H9	10d lp+iaa	ACTIN	UNKNOWN	SYBR	None				20.7166	20.6808	0.0488189		0.98009	0.0541347				TRUE	0.384301	TRUE	3	15	1	80.1508				N	N	N
Analysis Type	Singleplex
Endogenous Control	SPX5
RQ Min/Max Confidence Level	95.0
Reference Sample	0d

## Sheet: Raw Data
Block Type	96alum
Chemistry	SYBR_GREEN
Experiment File Name	D:\ShuJu\LZM\spx 5-8 iaa lp.eds
Experiment Run End Time	2023-08-17 02:37:08 AM CST
Instrument Type	sds7500
Passive Reference	ROX
Well	Cycle	1	2	3	4	5
A1	1	19531	3764.34	14065.4	101685	2455.01
A2	1	32261.1	4775.52	18121.9	119251	2803.92
A3	1	30883	5024.9	19857.4	124209	2366.86
A4	1	35676.3	5317.96	18335.9	103064	2771.47
A5	1	35543.7	5584.71	20776.3	116030	3485.03
A6	1	54271.7	9828.8	27181.4	139047	5381.81
A7	1	39445	6680.84	22735.7	123316	3604.29
A8	1	198619	31769	75929.2	391239	17244.1
A9	1	48858.9	7574.96	23654.9	134732	3332.71
A10	1	32043.6	5635.79	20703.1	127039	2996.14
A11	1	30875.3	5152.07	20757.1	141594	2572.77
A12	1	36176.6	5634.98	19047	136925	2857.96
B1	1	35691.9	5285.99	20041.7	136298	3048.46
B2	1	39627.1	6331.52	20255.5	122606	3007.67
B3	1	31863.8	5352.24	22071.8	128437	2611.27
B4	1	30015.4	4801.48	21712.3	121379	2585.98
B5	1	33829.1	5334.46	25686.3	144011	4100.47
B6	1	26785.4	4283.07	23499.3	125752	2118.83
B7	1	31911.3	5343.67	24314	129815	2665.59
B8	1	116800	16288.7	70738	388003	8744.52
B9	1	40020.6	6605.2	23951.2	130529	2729.92
B10	1	39638.8	6189.51	21954	126941	2416.88
B11	1	43149.7	6797.6	23871.5	148176	3136.14
B12	1	45344.9	8069.26	22839.5	148174	5261.16
C1	1	40164.3	6990.39	21921.6	141935	4104.58
C2	1	41123.7	6552.01	27573.8	169935	4164.46
C3	1	35596.9	4650.09	24145.4	138358	2542.45
C4	1	29996.1	4454.92	22298.6	119180	3314.89
C5	1	31717	5105.98	25139.9	129009	3014.17
C6	1	32661.8	5431.54	26501.7	134004	2932.51
C7	1	34391.7	5656.95	27468.3	139399	2152
C8	1	36166.3	5626.08	24151.9	122957	2796.2
C9	1	39507.1	7878.18	24518	125375	3068.5
C10	1	32828.3	6259.61	23934.1	134070	2620.49
C11	1	34088.4	6011.01	23453.4	142520	2291.67
C12	1	44890.3	7094.55	22582.9	144918	2974.27
D1	1	43985.2	7119.65	22493.4	139414	3381.63
D2	1	32083.4	4919.98	20919.7	123107	2500.43
D3	1	40599	7097.25	26261.6	140328	3943.7
D4	1	32076.7	5604.62	23743.9	122298	3937.79
D5	1	37116.4	5936.41	26089.8	130004	2784.07
D6	1	42518.6	7372.76	28468.8	135330	4502.69
D7	1	31192.3	5270.54	26122.9	129858	2677.65
D8	1	31302.5	6338.32	26838.9	133608	2482.86
D9	1	45136.3	8446.12	25421.1	128778	4491.72
D10	1	40055.8	7101.82	25378.1	132952	3558.83
D11	1	40514.2	7592.56	24380.6	137544	3366.43
D12	1	154462	19970.8	30683.5	156678	8080.79
E1	1	46415.4	6950.24	22941.8	144677	4281.45
E2	1	41807.7	6916.62	21108.3	118201	3713.84
E3	1	77042.3	8506.45	27153.4	143908	5588.45
E4	1	34572.9	5986.29	25409.1	132382	2920.42
E5	1	31403.5	5358.09	26013.8	131156	3513.07
E6	1	34113.5	5822.69	26865.3	132482	3842.93
E7	1	45361.7	7923.22	28285.6	134280	5014.63
E8	1	38652.7	7325.34	27174.7	132256	4164.14
E9	1	39831.6	9148.76	30271.9	134469	3432.64
E10	1	35821.2	6537.02	24001	130092	3719.28
E11	1	72744.8	13276.9	27074.2	134542	6608.61
E12	1	62543.8	10623.8	24735.4	143822	6017.92
F1	1	45299.1	8370.39	25517.7	158641	8072.43
F2	1	43209.6	6863.22	21427.4	124265	3012.65
F3	1	33657.8	5712.36	25321.7	144805	3129.11
F4	1	40408.4	6397.53	25187.9	132425	3481.2
F5	1	30166.7	4943.56	26110.8	135140	2490.35
F6	1	62975.5	11589.6	31098.1	140344	7358.45
F7	1	33238	5852.02	27645	139382	3235.14
F8	1	33061.8	5644.03	25151.7	130303	2530.18
F9	1	35580.5	6198.92	25222.6	134782	3808.99
F10	1	36074.5	6229.99	24360.2	135974	4271.86
F11	1	30604.6	4899.66	22187.4	134098	2530.18
F12	1	54542.1	9691.48	24166.1	142683	5972.79
G1	1	43045.7	6703.28	22814.9	153436	3803.28
G2	1	50149.1	7896.84	21959.6	129707	3433.91
G3	1	44390.3	7428.57	26826.3	153095	3157.99
G4	1	31351.8	5252.88	23442.9	130401	2458.47
G5	1	29530.4	5002.61	25237.1	136350	2334.21
G6	1	30553.2	5331.74	25539.4	133871	2517.15
G7	1	32025.1	5533.09	24661.9	130075	2835.47
G8	1	37912.2	6826.3	25708.3	134734	3664.58
G9	1	40530.2	6778.81	26140.6	143990	2922.36
G10	1	39975.1	7789.39	24514.1	136837	2891.96
G11	1	90687.4	15243.7	29059.4	151257	9072.43
G12	1	43334.1	6947.41	24038.5	160878	2890.48
H1	1	57326.7	9783.18	23585.7	154837	7566.95
H2	1	43787	7395.87	21442.2	135550	3831.74
H3	1	40977.3	7594.46	25928.4	152267	4507.3
H4	1	36609.9	6734.9	24645.1	138530	2764.79
H5	1	35157.1	6315.64	25584.9	144282	2833.73
H6	1	45138.1	8163.21	27865	149684	4034.12
H7	1	34655.7	8538.78	27836	146608	2683.69
H8	1	37471.1	6726.44	23643.6	131212	2879.21
H9	1	37650.8	6564.9	24183.5	139559	3289.95
H10	1	33098.6	7977.68	5245.86	6252.68	3353.44
H11	1	36702.9	6164.26	3961.1	5637.46	2968.69
H12	1	43480.2	5856.82	3583.23	5213.95	3452.27
A1	2	19641.8	3833	14000.9	101236	2675.57
A2	2	32624.4	4532.62	17996.3	118698	2693.21
A3	2	31371.7	4663.95	19763	124156	2325.6
A4	2	36106.4	5362.9	18164.7	103242	3202.24
A5	2	35860.6	5623.83	20852	115391	3379.93
A6	2	54688.9	9618.28	27245.9	139134	5732.29
A7	2	39828.4	6603.83	22758.2	122734	3450.3
A8	2	198599	31635.2	76042.8	389243	15702.4
A9	2	49075.4	7359.38	23759.7	134104	3559.17
A10	2	32568.1	5852.77	20826.2	128116	3521.1
A11	2	31539.5	5166.44	20898.2	142281	2491.46
A12	2	36878.8	5478.74	18723	136347	3136.65
B1	2	35318.9	5686.77	20305.6	136350	3635.48
B2	2	39392.6	6492.11	20224.4	121173	3823.44
B3	2	31509.3	5083.93	21874.9	125598	2486.2
B4	2	30042.3	4731.24	21579.3	118452	3020.57
B5	2	33998.6	5248.26	25239	141968	3559.85
B6	2	26562.8	4166.53	22958.4	122961	1791.53
B7	2	31818.9	5206.43	23790.4	126134	2707.31
B8	2	116636	16534.1	68756.4	377468	8713.98
B9	2	39603	6478.3	23465.8	127834	2704.13
B10	2	39111.5	6240.87	21662	125061	2188.82
B11	2	43108.8	6678.52	23391.2	144406	3168.47
B12	2	46130.4	8309.72	22832.6	148263	5290.68
C1	2	40814.1	6870.14	22228	141793	3946.45
C2	2	41060.2	6158.89	27121.9	165510	4060.69
C3	2	36037.2	4791.17	23757.8	135831	2314.08
C4	2	30373.7	4629.5	21732.5	115601	2724.26
C5	2	31638	5021	24554.4	125761	3411.37
C6	2	32465.3	5218.06	26404.8	132244	2877.21
C7	2	34332.3	5424.32	26832.1	135768	1995.34
C8	2	36310.5	5872.8	23794.4	120842	2848.33
C9	2	39216.7	7675.55	24132.7	123065	3180.11
C10	2	32959.8	6087.36	23541.3	131322	2349.98
C11	2	34197.4	5984.78	22923.7	138985	2085.14
C12	2	45174	7062.48	22601.4	144244	3067.92
D1	2	44533.7	7151.26	22463.4	139636	3381.63
D2	2	31263.5	4804.78	20392.1	120254	2430.4
D3	2	40478	7178.38	26002.5	138577	3921.58
D4	2	31987.2	5804.05	23501.2	120387	3632.2
D5	2	37316.8	5976.09	25724.6	126963	3000.77
D6	2	42918.9	7514.45	27933	131779	4700.12
D7	2	31011.6	5353.43	25724.7	125867	2457.17
D8	2	31150.5	6761.05	26213.7	129267	2283.33
D9	2	44798.1	8287.88	25082.4	126848	4363.55
D10	2	39773.9	7268.75	25252.6	130825	3806.53
D11	2	40645.5	7870.42	24273.4	135578	3364.34
D12	2	154141	19973.7	30683.5	156273	8060.92
E1	2	46827.4	7139.76	23095.6	143531	4097.9
E2	2	41097.8	6632.8	20933.3	116759	3677.34
E3	2	76198.8	8459.98	26738.4	140431	5387.08
E4	2	34143.8	5992.51	24778.3	128714	2788.01
E5	2	31525.1	5260.78	25781.5	129566	3342.85
E6	2	34388.6	5789.01	26460.5	128754	3981.36
E7	2	45146.7	7654.44	27809.9	131898	5084.68
E8	2	38513	7167.41	26679.8	128562	4164.14
E9	2	39555.6	9102.95	30017.9	132664	2926.77
E10	2	35716.4	6274.94	23539.7	127006	3217.99
E11	2	70780.5	12852.9	26578.5	131763	6063.79
E12	2	63846.1	10922.2	25029.2	144077	5941.65
F1	2	45389.7	8381.83	25567.4	157813	8206.4
F2	2	42649.5	6733.19	21145.6	121929	3155.72
F3	2	33424.7	5579.95	24860.2	141166	3007.48
F4	2	40675.5	6524.04	24685.2	128974	3322.93
F5	2	30187.8	5097.41	25779	132741	2411.49
F6	2	63881.5	12036.9	30891.7	137625	7598.39
F7	2	34083.1	5915.93	27157.3	135671	3536.89
F8	2	32998.6	5473.49	24895.8	126620	2338.85
F9	2	35220.5	6148.22	24647.4	131566	3650.74
F10	2	35991.5	6187.49	24110	133897	3984.45
F11	2	30591.2	5046.55	22081.5	132815	2103.34
F12	2	54935.1	9687.19	24311	143440	5842.87
G1	2	43484.3	6779.37	22813.6	152537	3805.86
G2	2	49641.1	8022.22	21440.3	126515	3181.21
G3	2	44159.3	7503.09	26379	150703	3176.59
G4	2	31142	4986.6	23245.6	128131	2527.07
G5	2	29430.7	4714.58	24660.2	132566	2288.45
G6	2	30574.5	5188.42	24779.1	129871	2693.6
G7	2	32116.4	5708.02	24238.3	126813	2782.14
G8	2	37573.6	7005.64	25352.2	131346	3976.6
G9	2	40312.4	6883.36	25693.4	140679	3102.81
G10	2	39642.4	7661.33	24232.8	134542	2936.83
G11	2	89874.1	15421.6	28971.2	149949	9083.32
G12	2	43832.9	7175.52	24179.7	160722	2977.17
H1	2	57135.8	9783.18	23281.6	153961	7030.66
H2	2	44220.6	7624	21305.3	135214	3529.72
H3	2	40703.4	7320.16	25701.5	152107	4617.13
H4	2	37289.9	7097.75	24630	138141	2864.67
H5	2	35130.4	6308.85	25724.9	143831	2853.24
H6	2	45042.2	8146.44	27930.3	149550	4338.5
H7	2	35121.4	8737.76	27962	146266	2551.13
H8	2	37974.9	6726.44	23829.7	131230	2775.59
H9	2	37832.7	6641.13	24181.8	138587	3100.08
H10	2	33160.5	8127.78	5323.04	6472.98	3361.41
H11	2	36848.8	6076.89	3904.19	5711.78	3042
H12	2	43997.4	5920.48	3565.58	5562.4	3556.75
A1	3	19739.5	3635.4	13977.3	101356	2480.96
A2	3	32522.8	4571.48	17976.4	118258	2561.73
A3	3	31754.5	4696.64	19657.7	122430	2349.35
A4	3	35901.6	5653.28	18454.5	102422	3096.66
A5	3	35964.3	5575.45	20808.5	115227	3475.21
A6	3	54898	9499.47	27181.4	138256	5551.3
A7	3	39728.8	6729.94	22747.4	122190	3881.11
A8	3	197178	31222.6	75483.3	386912	16465.6
A9	3	48864.6	7698.01	23553.1	133744	3594.77
A10	3	32540.6	5805.06	20766.9	127547	3211.65
A11	3	31795.7	5191.58	21214.1	142107	2884.05
A12	3	36869.7	5770.39	18748	136505	2917.68
B1	3	35461.5	5357.77	20474.9	135917	3919.69
B2	3	39105.6	6615.53	20071.5	120819	3177.08
B3	3	31375.2	5209.14	21670.4	124096	2489.74
B4	3	30192.2	4624.74	21037.9	116953	3028.12
B5	3	33803.8	5241.79	25144.8	140885	3845.85
B6	3	26487	4027.4	22714.7	120599	2039.04
B7	3	31744.7	5081.42	23525.9	125337	2711.75
B8	3	114127	15754.6	68306	373996	8338.29
B9	3	39717	6520.3	23232.9	126431	2837.68
B10	3	39266.6	6026.55	21706.7	124609	2811.79
B11	3	42900.2	6508.09	23170.5	142814	3019.51
B12	3	45781.5	7952.62	22617	147386	5211.96
C1	3	41206	6776.89	22203.8	140692	4032.81
C2	3	41494.2	6441.39	26685.3	164610	4195.08
C3	3	35541.3	4630.43	23522.1	135383	2888.95
C4	3	30106.1	4710.32	21680.4	114749	3068.71
C5	3	31539.7	5174.17	24523.5	124889	3208.76
C6	3	32638.5	5586.86	26293.9	131588	2980.03
C7	3	34674.8	5560.09	26594.1	134337	2246.82
C8	3	35993.2	5705.72	23515.9	119196	2690.14
C9	3	39292.3	7994.71	24064.9	121325	2944.28
C10	3	33060.6	6149.02	23348.5	129514	2778.61
C11	3	33749	5828.46	22690.5	137476	2135.95
C12	3	45294.7	7151.56	22521.9	143989	3190.02
D1	3	44780.9	7133.35	22329.5	138389	3115.21
D2	3	31460.7	4819.76	20424.6	119342	2635.03
D3	3	40064.4	7000.32	25858.6	137937	4095.39
D4	3	32177.7	5526.89	23432.4	119820	4174.65
D5	3	37684.3	6187.74	25559.3	125829	2750.12
D6	3	43160.6	7404.73	27876.4	130690	4903.92
D7	3	31083.9	5399.19	25135.8	124470	2293.18
D8	3	31181.2	6661.11	26012.5	128506	2346.73
D9	3	44277.8	8493.86	24999.8	125451	4349.2
D10	3	39544.9	7398.16	24840.6	130473	3685.58
D11	3	40486.7	7476.44	24062.2	134666	2987.98
D12	3	154429	20038.1	30636.2	156179	7785.66
E1	3	46671.2	7275.3	22934.2	142984	3962.59
E2	3	41422.6	6935.03	20683.5	116226	3783.71
E3	3	75323.1	8466.49	26478.2	139787	5371.09
E4	3	34224.5	6077.91	24757.2	127470	3113.86
E5	3	32091.7	5772.97	25788	128659	3399.59
E6	3	34296.9	6098.15	26218.5	127336	3706.34
E7	3	45099.6	7703.55	27355	130381	5578.86
E8	3	38132	7007.67	26222.6	127341	4235.16
E9	3	39662.8	9089.74	29994.4	131809	2876.28
E10	3	35462.2	6387.77	23208.4	125499	3588.91
E11	3	69934.3	12855.8	26118.3	130436	6464.28
E12	3	63864.2	10977.4	24991.7	143323	6168.81
F1	3	45650.9	8469.02	25241.6	156573	8140.05
F2	3	42318.3	6650.35	21146.6	121781	3077.03
F3	3	33610.9	5580.85	24709.6	140079	3308.41
F4	3	40367.2	6539.12	24464.6	127930	3124.65
F5	3	30106.3	4996.19	25592.7	131789	2514.09
F6	3	64752.1	12005.2	30687.7	136566	8077.47
F7	3	34484.4	6042.98	26819.4	134185	3605.32
F8	3	32896.5	5532.95	24385.4	125278	2585.43
F9	3	35279.2	6091.9	24525.7	130341	3752.84
F10	3	35791.1	6207.04	23958.3	133081	4094.53
F11	3	30567.4	4884.57	21816.3	131970	2340.14
F12	3	55344.6	9760.98	24117	142461	5843.7
G1	3	43497.4	7024.56	22645	152383	3652.49
G2	3	49176.1	7996.2	21407.1	125859	3214.03
G3	3	44262.7	7579.43	26279.9	149725	2841.84
G4	3	31373.8	5426.36	22835.6	127238	2447.03
G5	3	29366.5	4943.77	24348.8	131023	2658.42
G6	3	30510.6	5227.31	24595.8	128531	2768.8
G7	3	31961.4	5753.26	24001.6	125951	2666.83
G8	3	37406.2	7060.5	24972.8	129960	3720.54
G9	3	40435.3	6728.24	25414.8	139226	3169.39
G10	3	39854.8	7804.61	24117.2	132871	3087.02
G11	3	89428.1	15005	28869.9	149515	9416.76
G12	3	44107.1	7010.51	24270.8	160751	2953.22
H1	3	56547.9	9606.98	23213.8	153416	7232.16
H2	3	43560.1	7383.12	21369.7	135280	3457.1
H3	3	40827.4	7747.94	25685.1	151515	4901.04
H4	3	37585.7	6923.74	24642	137690	2761.54
H5	3	35253.8	6335.99	25710.8	143679	2723.38
H6	3	45206.3	8278.29	27982.8	149135	4546.52
H7	3	35629.9	9105.83	28102.8	145453	2828.94
H8	3	38198.1	6827.82	23684.6	131212	2792.74
H9	3	37883	6677.93	24174.9	138324	2841.08
H10	3	33507	8223.49	5402.19	6382.86	3654.22
H11	3	37002	6582.72	4058.52	5590.16	3483.02
H12	3	43883.4	5914.56	3492.26	5476	3397.2
A1	4	19747	3839.7	13845.3	100709	2675.57
A2	4	32694.1	4929.36	18000.9	117407	2748.56
A3	4	31021.4	4888.48	19483.9	121286	2430.62
A4	4	35522.7	5660.2	18290.2	102233	2973.13
A5	4	35875.2	5599.12	20625.1	114783	3221.79
A6	4	54440.1	9720.41	27065.4	136997	5478.06
A7	4	39741.6	6519.11	22597.6	121063	3729.95
A8	4	197128	31555.6	75439.6	385676	15782
A9	4	49233.1	7486.49	23567.3	133308	3343.59
A10	4	32844.8	5886.86	20820.6	126661	2979.57
A11	4	31794.3	5076.64	20939.9	142556	2913.09
A12	4	36317	5614.15	18881.5	135442	3055.6
B1	4	35496.6	5447.5	19897.9	134618	3606.73
B2	4	39222	6526.31	20143.7	120194	3412.95
B3	4	31472.3	5342.02	21458.3	123184	2842.55
B4	4	29923	4611.15	21076.9	116716	2677.64
B5	4	33786.2	5236.41	24952.9	139831	3697.42
B6	4	26316.1	4002.11	22650.9	120483	1937.5
B7	4	31487.5	5131.25	23611	124837	2897.27
B8	4	115314	16588.1	67349	371668	8188.63
B9	4	39554.1	6649.94	23016.8	125702	2894.78
B10	4	39411	6193.46	21551.7	123814	2175.98
B11	4	42534.3	6344.66	23068.2	142310	3416.73
B12	4	45961.7	8121.09	22425	146303	5386.26
C1	4	41103.3	6932.72	22034.5	139973	4005.89
C2	4	40722.2	5944.46	26719.1	163733	3919.5
C3	4	35404.6	4615.39	23690.4	134924	2282.58
C4	4	30174.8	4565.92	21621.7	114910	2865.71
C5	4	31213.8	5041.75	24488.3	124221	3242.86
C6	4	32803.7	5525.4	26220.5	130946	2906.59
C7	4	34637.8	5607.73	26301	134077	1844.46
C8	4	35797	5564.62	23312.7	118334	3154.83
C9	4	39053.7	7781.65	23655.2	121021	3113.5
C10	4	32920.2	5916.09	23206.6	128985	2461.37
C11	4	33804.7	5890.77	22505.3	136914	2327.01
C12	4	45075.2	6959.14	22459.7	142796	3053.69
D1	4	44484	7061.7	22220.6	137493	3330.65
D2	4	31370.2	4864.69	20228.5	119106	2597.82
D3	4	40163	6970.82	25786.7	137083	4059.57
D4	4	31732.2	5532	23376.2	119260	3949.43
D5	4	37647.4	6331.35	25362.3	125332	3165.54
D6	4	43422.4	7683.78	27726.4	130097	4607.32
D7	4	30776.3	5403.51	25219.8	123656	2313.22
D8	4	31253.5	6607.17	25960.3	127697	2334.61
D9	4	44125.5	8403.68	24751.1	124979	4374.07
D10	4	39505.9	7209.67	24753.4	129413	3562.7
D11	4	39986.1	7626.77	24039.5	133540	2935.85
D12	4	154088	19939.6	30557.7	155457	7469.67
E1	4	46761.3	7075.44	22813.1	142268	4172.36
E2	4	41361.2	6886.28	20637.1	115575	3612.67
E3	4	74932.5	8242.49	26340.2	139168	5129.25
E4	4	34198.4	5706.99	24686.6	127302	2749.51
E5	4	32309.7	5686.28	25575	128043	3696.52
E6	4	34266.3	5820.96	26191.2	126969	3787.01
E7	4	45007.1	7835.71	27360.6	129641	5122.55
E8	4	37667.9	7112.36	26189.6	126603	4213.08
E9	4	39568	9111.76	29715.9	131391	3172.69
E10	4	35280.5	6423.31	23175.9	124878	3116.08
E11	4	69262.3	12714.1	26038.9	129679	6340.98
E12	4	64006.4	10866.2	24818.4	142664	5867.04
F1	4	45677.6	8270.33	25125.2	155458	8117.08
F2	4	42022.6	6558.07	21006.2	121434	3157.76
F3	4	33525.6	5431.44	24590.9	139982	2774.12
F4	4	40437.7	6668.15	24348.7	127847	3566.43
F5	4	30282.2	4885.26	25352.4	131577	2432.69
F6	4	65369.3	12157.1	30741.4	135204	8055.15
F7	4	33279	5654.04	26526	133281	3532.77
F8	4	33024.3	5708.17	24397.6	125039	2295.96
F9	4	35341	6179.6	24480.2	130591	3858.34
F10	4	35679.6	6054.05	23947.2	132226	4149.56
F11	4	30602.6	5152.19	21591.6	131056	2352.08
F12	4	54882	9682.9	23882.8	141705	5728.68
G1	4	43387.8	6917.47	22441.3	151633	3777.5
G2	4	49059.2	7888.56	21217.1	125755	3298.26
G3	4	43982.2	7412.21	25963.5	148866	2991.5
G4	4	30741.2	5019.69	22980	126802	2558.93
G5	4	29266.9	4871.76	24323.9	131035	2523.53
G6	4	30534.6	5344.71	24478.5	128168	2596.07
G7	4	32127	5626.59	24092.7	125502	2971.95
G8	4	37557.5	7116.19	24859.6	129610	3887.57
G9	4	40214.1	6762.52	25510.2	139007	3076.53
G10	4	39046.2	7549.39	24092.2	132390	2863.57
G11	4	89008.7	15202	28838.4	148879	9100.76
G12	4	44379.9	7205.85	24250.3	160531	3096.95
H1	4	56867.9	9567.83	23259.5	153778	7844.4
H2	4	43443.3	7320.67	21236.3	134205	3508.97
H3	4	40567.6	7812.16	25723.1	151098	4769.44
H4	4	37197.5	6924.57	24477.5	136837	2820.01
H5	4	35111	6155.05	25573.8	143190	3005.63
H6	4	45072.9	8103	27786.2	148439	4305.62
H7	4	35446.4	9219.08	27923.1	144512	2582.88
H8	4	38173.1	6866.28	23681.8	130446	2701.27
H9	4	38103.9	6696.33	24101.6	137657	2813.96
H10	4	33834.2	8272.85	5376.78	6684.28	3708.01
H11	4	36901.9	6357.4	4027.87	5848.04	3222.47
H12	4	43549.6	5748.74	3497.69	6026.99	3579.34
A1	5	19884.2	3772.72	13727.4	100414	2478.08
A2	5	32771.3	4956.89	17734.3	117102	3273.09
A3	5	31013.3	5006.43	19486.7	120675	2163.05
A4	5	35207.9	5556.49	18216	101753	3060.76
A5	5	35547.1	5718.54	20659.3	114283	3330.82
A6	5	54037.3	9753.76	26708.7	136171	5809.71
A7	5	39208.3	6580.72	22298	120299	3745.06
A8	5	196415	30508.3	74731.4	383801	16376.7
A9	5	48864.6	7421.41	23491	132653	3498.85
A10	5	32325.5	5885.72	20616.9	126630	3327.7
A11	5	31977.5	5185.59	21136.6	141616	2771.39
A12	5	36844.2	5563.56	18746.6	135038	3160.82
B1	5	35753.3	5565.14	20396.6	133093	3877.4
B2	5	39246.6	6217.02	19881.8	119688	3199.23
B3	5	31497	5219.36	21300.5	122822	2439
B4	5	30127.8	4622.48	20915.2	116250	2910.57
B5	5	33524.2	5143.75	24896.4	139108	3650.36
B6	5	26316.1	4070.77	22620.9	120289	1868.59
B7	5	31208.7	5048.2	23496.9	124492	2870.64
B8	5	113662	16188.9	67377.1	371685	8384.11
B9	5	39277.3	6711.1	23019.7	125214	2638.74
B10	5	39111.5	5942.6	21494.1	123550	2356.65
B11	5	42730.1	6713.54	22959.1	142066	3313.96
B12	5	45351.4	8005.9	22376.6	145378	5359.55
C1	5	40631.3	6273.8	21756.9	139064	3977.85
C2	5	41784.2	6281.42	26676.8	162970	3929.7
C3	5	35798.5	4542.54	23461.8	134067	2585.2
C4	5	30381.1	4629.5	21495.4	114951	2973.69
C5	5	31459.7	4888.58	24218.8	124134	2818.57
C6	5	32675.4	5404.95	25999.6	130276	2833.14
C7	5	34748.9	5415.59	26454.6	133723	2222.91
C8	5	35728.8	5469.39	23320.9	117982	2707.22
C9	5	39159	7950.36	23783.6	120614	3266.52
C10	5	32611.8	5945.45	23174.6	128450	2700.05
C11	5	33750.2	6048.18	22733	136510	1847.69
C12	5	44987.9	7228.77	22206.2	141881	3071.47
D1	5	44532.6	7262.95	22349.5	137255	3221.01
D2	5	31879.3	4746.03	20138.9	118386	2066
D3	5	40493.3	7012.96	25778.3	136462	3813.09
D4	5	32252.7	5723.25	23229.9	119251	4138.7
D5	5	37805.6	6103.65	25364.2	124957	3288.36
D6	5	43215	7757.21	27613.1	129502	5018.56
D7	5	30938.5	5250.68	25112	123371	2795.18
D8	5	31525.1	6767.24	25963.1	127657	2801.72
D9	5	43697.7	8383.35	24635.1	123959	4376.94
D10	5	39521.7	7183.41	24705.5	129212	3741.7
D11	5	40369.2	7601.89	23856.1	133633	3328.89
D12	5	152923	20023.5	30215.3	154308	7453.77
E1	5	46564.4	6834.23	22561.2	141311	4303.47
E2	5	40539.2	6653.38	20519	114995	3639.79
E3	5	73960.5	8125.37	26251.6	138054	5018.22
E4	5	33992.9	5818.17	24705.9	127462	3039.68
E5	5	32137.1	5732.28	25678.3	127865	3610.47
E6	5	34322	5947.03	26014.8	126291	3548.66
E7	5	44258.3	7615.15	27179.8	129716	5247.51
E8	5	37691.2	7049.19	26178.3	126169	4048.01
E9	5	39373.5	9117.05	29658.8	130883	3159.6
E10	5	35507.6	6290.93	23139.8	123801	3574.22
E11	5	68867	12536.8	25933.6	129521	6315.17
E12	5	63660	10944.8	24757.4	141712	6006.32
F1	5	45006.8	8331.8	25311	154680	7613.12
F2	5	42144.8	6600.01	20845.6	120921	2652.93
F3	5	33703.1	5632.74	24428	139654	3087.67
F4	5	40475.8	6761.14	24246.4	127401	3059.43
F5	5	30335.8	4999.43	25349.1	131099	2327.55
F6	5	65712.1	12353.5	30489.1	134976	8190.67
F7	5	33794.7	5975.95	26592.1	133073	3606.14
F8	5	32856.1	5394.49	24278.1	124696	2475.75
F9	5	35175.3	6147.42	24410.7	130325	3735.82
F10	5	35556.3	6173.04	23846.1	132036	4030.75
F11	5	30552.9	4987.19	21513.5	130142	2177.96
F12	5	54937	9709.5	23867.2	140819	5487.88
G1	5	43759.2	6710.32	22559.4	150258	3870.3
G2	5	48627.6	7772.64	21197.2	125329	3250.13
G3	5	44188.1	7502.19	25951.1	147970	3421.01
G4	5	31312.7	5061.65	22923.1	126387	2489.5
G5	5	29337	4733.16	24300.5	130911	2608.73
G6	5	30659.8	5204.27	24378.1	128007	2537.26
G7	5	31752.6	5640.91	23970.1	125257	2613.5
G8	5	37323.3	6981.89	24791.4	129167	3778.19
G9	5	40159	6664.83	25352.9	138532	3169.39
G10	5	39320.2	7632.67	23986.4	132273	2838.85
G11	5	88333.2	14695.3	28492.1	148024	8905.71
G12	5	44215.4	7057.82	24102.3	159546	3333.07
H1	5	57141.6	9297.31	23289.4	152791	6936.12
H2	5	43323.9	7557.73	21243.3	133432	3753.35
H3	5	40515.8	7705.49	25529.1	150332	4958.03
H4	5	37438.2	6844.58	24389	135766	2690.09
H5	5	35028.5	6345.04	25516.1	142744	2714.37
H6	5	45089.4	8192.17	27765.9	147918	4280.38
H7	5	35407.5	9254.48	27923.1	143316	2751.95
H8	5	38239.4	6927.11	23520.7	129707	2695.55
H9	5	38087.4	6785.71	24007.6	137450	2764.08
H10	5	33622.8	8336.32	5500.87	6352.82	3235.92
H11	5	37520.7	6670.1	4118.72	5888.59	3295.78
H12	5	43911.5	5773.91	3700.01	5124.72	3452.27
A1	6	20012	3622.01	13776.1	99586.5	2476.63
A2	6	31739.6	4560.15	17777.2	116116	2637.85
A3	6	31122.4	5029.17	19169.3	120463	2140.55
A4	6	35431.9	5640.61	18229.7	101575	3109.33
A5	6	35401.6	5563.09	20633.4	114149	3536.11
A6	6	54021.9	9609.94	26671.1	135257	5862.03
A7	6	39365.7	6460.39	22163.8	119817	3795.14
A8	6	194783	31467.3	74579.9	381328	15748.3
A9	6	48349.9	7325.82	23333.2	132477	3521.59
A10	6	32725.5	5774.39	20771.4	126136	3725.56
A11	6	31927.4	4881.47	21070.6	142318	2601.8
A12	6	36709.2	5599.27	18618.7	134491	3385.47
B1	6	35426.4	5471.43	19843.3	133292	4159.92
B2	6	39281.1	6367.21	19922.9	119069	3509.38
B3	6	31324.5	4998.32	21373.7	122597	2817.77
B4	6	29972.1	4454.8	20930.1	116014	2881.46
B5	6	33229.2	5391.56	24822.2	139166	3946.01
B6	6	26051	4094.25	22471.9	120177	2111.57
B7	6	31395.2	5159.22	23401.8	124316	2543.1
B8	6	114236	16706.8	67365.9	371463	8573.48
B9	6	39375	6495.65	22844.8	124875	2863.47
B10	6	39325.4	5974.2	21434.5	122715	2353.69
B11	6	42424.3	6452.05	22901.6	141680	2792.04
B12	6	45150.2	7896.47	22389.1	144632	4745.31
C1	6	40574.9	6498.35	21686.7	138381	4350.18
C2	6	41113.4	6189.52	26595.6	162857	4365.2
C3	6	35187.9	4690.56	23396.8	133894	2632.45
C4	6	30312.3	4527.12	21660.5	114946	3174.52
C5	6	31319.9	4783.83	24313.8	123610	2995.11
C6	6	32614.5	5283.68	25799.6	130248	2783.9
C7	6	34596.1	5498.95	26368.6	133265	2302.07
C8	6	35843.9	5619.15	23200.3	117504	2939.11
C9	6	38889.8	7856.44	23687.8	120183	3140.5
C10	6	32609.8	5986.56	23054.7	128018	2656.29
C11	6	33869.4	6108.3	22539	135864	1854.32
C12	6	44973.7	7254.9	21983.8	141643	3230.32
D1	6	44091.1	7009.01	22100.6	136722	3251.78
D2	6	31184.7	4954.54	20221.8	117761	2456.66
D3	6	40397.8	6925.51	25806.8	136069	4000.59
D4	6	31996.8	5475.75	23309.4	118593	3682.96
D5	6	37936.6	6210.41	25393.1	124909	2745.13
D6	6	43315.9	7861.75	27481.4	129285	4760.17
D7	6	30665.5	5285.21	24960.4	123398	2381.55
D8	6	31247.7	6567.37	25803.8	127512	2676.79
D9	6	43552.9	8484.13	24494	123618	4188.51
D10	6	39180.5	7325.02	24698.8	128897	3873.29
D11	6	40179.8	7815.47	23931.3	133270	2814.91
D12	6	152504	19834.3	30014.7	153844	7389.18
E1	6	46985.9	6992.74	22744.4	141066	3891.27
E2	6	40474.7	7024.94	20435.8	114966	3561.57
E3	6	73549.4	8311.27	26043.6	138593	5324.98
E4	6	34212.3	5963.16	24563.8	127035	3074.42
E5	6	32240	5497.86	25648.8	127607	3591.56
E6	6	34372.2	5826.14	25886.5	126183	3808.1
E7	6	44384.9	7567.82	27267.4	129397	5245.62
E8	6	37767.7	6960.74	25895.4	126163	4307.13
E9	6	39383.5	9067.72	29595.3	130331	3052.07
E10	6	35557.4	6341.57	23051.3	123920	3308.88
E11	6	68355.4	12444.3	25876.2	129103	6308.48
E12	6	63422.9	10670.6	24545	141544	5872.84
F1	6	45463.9	8115.96	24837.3	153545	7852.98
F2	6	41522.1	6653.49	20746.6	120838	3030.02
F3	6	33432.5	5590.69	24317.2	139525	2850.71
F4	6	40681.9	6475.45	24176.6	127512	3124.65
F5	6	30192.3	5023.73	25297.5	130679	2304.65
F6	6	65693.4	12494.1	30657.3	134721	8150.81
F7	6	34149.2	6011.03	26604.2	132836	3907.89
F8	6	33005.2	5735.55	24286.1	124377	2382.56
F9	6	35260.4	5972.01	24331.2	129918	3713.7
F10	6	35460.7	6107.6	23644.7	131564	4056.96
F11	6	30756.7	5093.83	21644.1	129620	2293.38
F12	6	54863.7	9700.06	23788.6	140150	5619.45
G1	6	43257.7	6783.6	22274	149474	3435.97
G2	6	48063.6	7586.93	21126.5	125190	2924.13
G3	6	43753	7211.37	25792.8	147417	2880.8
G4	6	31369.1	4999.52	22816.4	125958	2665.11
G5	6	29301.6	4956.93	24420.4	130362	2597.68
G6	6	30350.1	5339.67	24282	127765	2668.29
G7	6	31903.3	5662.03	23754.9	124947	2782.14
G8	6	37390.1	7207.09	24767.3	129171	3601.83
G9	6	39933.5	6914.21	25322.8	138235	2851.4
G10	6	39420.2	7579.83	24083.2	131839	2928.59
G11	6	87754	14717.8	28365.8	147674	8947.12
G12	6	44422.7	7299.27	23991.8	159039	3268.05
H1	6	57189.8	9542.91	23089.3	151637	7353.06
H2	6	43177.5	7253.12	21134.5	132992	3444.42
H3	6	40380	7599.91	25348.4	149917	4709.35
H4	6	37405.8	6867.67	24167.9	135424	2715.26
H5	6	35356.4	6241.75	25429.5	142421	2806.7
H6	6	45138.1	8261.52	27712.7	147358	4157.25
H7	6	35563.2	9282.79	27609.6	142656	2640.82
H8	6	38284	6865.58	23501.2	129185	2756.3
H9	6	38082.2	6642.01	23871.4	136654	2680.09
H10	6	33436.9	8383.67	5445.18	6735.35	3623.35
H11	6	37544.8	6524.09	4000.51	5858.18	3433.39
H12	6	43908.2	5636.23	3641.62	5698.38	3566.64
A1	7	19427.6	3727.5	13812.3	98969.9	2822.61
A2	7	32219.7	4877.54	17673	115836	2489.76
A3	7	31006.8	4899.85	19241.8	119580	2291.84
A4	7	35837.6	5619.86	18075.7	101442	3437.68
A5	7	35833.5	5781.34	20581.6	113288	3384.84
A6	7	53774.2	9659.97	26572.2	134195	5388.08
A7	7	39181.5	6691.43	22265.7	118979	3447.46
A8	7	194328	31003.5	74763.5	380276	16839.5
A9	7	48439.7	7462.09	23433	131896	3501.82
A10	7	32868.4	6179.95	20682.9	125834	3481.32
A11	7	31867.3	5207.14	20976.9	141879	2608.77
A12	7	36211.2	5758.48	18343.3	133176	3507.75
B1	7	34597	5549.19	19892.4	132587	3659.17
B2	7	39186	6371.67	19830.9	119099	3814.32
B3	7	31447.7	4856.5	21228.5	121944	2894.47
B4	7	30330.3	4843.4	21064.3	116290	2857.73
B5	7	33427.3	4982.13	24752.8	139133	3460.9
B6	7	26353.1	4122.26	22499.1	120301	2205.86
B7	7	31490.3	5261.5	23385.5	124128	2821.82
B8	7	112655	16264.4	67045	370153	8054.24
B9	7	39407.6	6469.17	22974.8	124584	2815.57
B10	7	39401.3	5862.6	21346.1	122217	2149.32
B11	7	42258	6299.13	22730.4	141564	3226.2
B12	7	44997.6	7977.1	22394.6	144075	4756.55
C1	7	40472.3	6824.74	21593.4	137888	4050.75
C2	7	40965.9	6099.32	26226.7	162200	3662.62
C3	7	35272.5	4502.06	23237.8	133478	2356.83
C4	7	29921	4593.94	21564.1	114851	2844.11
C5	7	31341.1	5200.85	24192	123294	2882.77
C6	7	32580	5200.62	25969.9	129683	2868.57
C7	7	34903.2	5520.39	26291.8	133444	2113.25
C8	7	35812.4	5474.59	23111.4	117077	2770.14
C9	7	38802.4	8004.28	23612.7	119558	2865.97
C10	7	32140.3	5982.64	22995.7	127209	2616.51
C11	7	33720.7	5758.5	22560.8	135724	2361.25
C12	7	44497.4	6993.59	22087.5	140538	3002.72
D1	7	44101.1	7218.69	22050.7	136584	3509.54
D2	7	31182.4	4732.21	20084	118099	2548.58
D3	7	40156.9	7005.59	25511.8	135677	4154.37
D4	7	31800.5	5690.53	23304.1	119097	4196.86
D5	7	37820.6	6059.24	25169.2	124488	2922.88
D6	7	43473.6	7878.16	27262.9	129138	4828.41
D7	7	30709.7	5248.95	25138.5	123261	2886.29
D8	7	31550	6576.21	25965.9	127613	2584.48
D9	7	43509	8563.7	24610	123258	4311.9
D10	7	39319.6	7278.13	24724.7	128558	3721.38
D11	7	40109.9	7734.6	24023	133051	3304.92
D12	7	150276	19540.8	30015.7	153086	7806.53
E1	7	46568	7030.64	22580.8	140449	4237.39
E2	7	40249.3	6682.63	20393.6	114611	3706.54
E3	7	72699.6	8353.09	26227.3	137803	5337.21
E4	7	34206.6	5788.82	24398.7	127236	2859.38
E5	7	32433.7	5527.93	25518.8	127352	3546.17
E6	7	34215.4	5876.23	25797.4	125799	3753.09
E7	7	44280.2	8002.69	27386.1	129335	5157.58
E8	7	37599.7	6899.38	25887	126130	3980.84
E9	7	39184	9106.48	29354	130253	3245.63
E10	7	35322.4	6224.3	23100	123715	3310.72
E11	7	67546.4	12465.5	25888.6	128778	6394.5
E12	7	62605	10780.9	24417.3	140840	5865.38
F1	7	45170	8203.15	24917.1	153679	7736.88
F2	7	41523.1	6424.89	20609.3	120253	3420.4
F3	7	33576.1	5440.39	24380.1	139055	3073.25
F4	7	40767.5	6678.2	24338.5	127456	3215.96
F5	7	30343.3	4991.34	25228.5	130338	2499.68
F6	7	65999.6	12300.6	30433	134410	8249.65
F7	7	34260	6006.35	26554.2	132998	3551.73
F8	7	32942.8	5507.13	24150.5	124193	2232.46
F9	7	34933.5	6140.98	24279.9	129649	3798.78
F10	7	35604.1	6177.29	23601	131095	3865.64
F11	7	30505.3	5036.49	21391.7	128979	2581.91
F12	7	55083.5	9908.55	23777.1	139285	5674.06
G1	7	43229.9	7093.61	22327.1	148955	3743.99
G2	7	48212.7	7699.3	21220.4	125398	3028.05
G3	7	43747.6	7621.24	25909.5	146801	3278.43
G4	7	31185.1	5164.12	22913.4	125825	2783.54
G5	7	29274.3	4787.36	24073.2	130439	2572.44
G6	7	30549.9	5314.46	24319.4	127429	2598.3
G7	7	32105	5711.79	23892.8	124976	2591.54
G8	7	37463	6979.43	24709	128846	3831.61
G9	7	39771.7	6837.94	25276.3	138355	3094.05
G10	7	39079.6	7668.49	23958.7	131625	2908.44
G11	7	86888.5	14669.4	28350.5	146898	8792.39
G12	7	44079	7279.86	23952	158763	3180.22
H1	7	57093.4	10021.7	23078.3	151161	6964.02
H2	7	42929.2	6962.54	21070.2	132086	4148.75
H3	7	40485.7	7513.92	25371	148808	5137.28
H4	7	37276.9	6969.1	24341.1	134816	3011.63
H5	7	35177.2	6397.06	25490.9	141804	2820.97
H6	7	45089.4	8375.84	27529.6	146827	4397.39
H7	7	35475.6	9262.34	27557.5	142231	2710.67
H8	7	38035.8	6782.38	23389.4	128516	2626.24
H9	7	37775.5	6731.38	23786	135871	2951.33
H10	7	34175.5	8241.62	5456.9	6694.29	3877.32
H11	7	37840.4	6549.39	3962.2	5828.9	3343.16
H12	7	44094.9	5803.52	3640.26	5604.89	3256
A1	8	19258.5	3960.26	13700.7	98243	2597.73
A2	8	32074.7	4569.86	17412.5	114910	2740.26
A3	8	30601.1	4770.53	19328	119637	2198.06
A4	8	35242.4	5549.57	18091.7	100859	3139.95
A5	8	35595.6	5552.8	20495.6	112874	3491.91
A6	8	53471.5	9398.38	26461.6	133944	5481.2
A7	8	38543.2	6641.37	22089.4	118538	3496.59
A8	8	193460	30721.7	74241.8	379966	16533
A9	8	48223.2	7510.9	23230.4	131134	3522.58
A10	8	32928.8	5778.93	20547.4	125420	3334.33
A11	8	32087.7	5226.3	20843.9	141259	2788.81
A12	8	35968.6	5614.15	18365.6	133137	3055.6
B1	8	35022.7	5884.18	19553.9	132069	3627.03
B2	8	39095.8	6123.34	19693.5	118734	3008.97
B3	8	30848.2	4916.55	21170.4	121763	2371.74
B4	8	29791.9	4702.92	20834.9	116204	3066.94
B5	8	33413	4988.59	24751.6	138343	3791.55
B6	8	26478.7	4137.62	22381	119908	1848.65
B7	8	31415.1	5252.76	23371.9	123898	2674.47
B8	8	112558	16313	67002.8	369507	8967.48
B9	8	39309.9	6349.57	22741.9	123831	3124.12
B10	8	38950.1	6058.15	21172.3	121540	2490.93
B11	8	42242.6	6408.86	22851	140965	3392.48
B12	8	45197.3	7679.04	22098.9	143137	5310.36
C1	8	40727.7	6879.96	21600.3	137576	4102.34
C2	8	41034.5	5871.28	26595.6	162768	4213.8
C3	8	35547.1	4718.32	23248.2	133150	2914.82
C4	8	30071.2	4704.93	21614	114906	3201.52
C5	8	31585	4962.7	24167.2	123287	3443.47
C6	8	32591.2	5261.25	25813.5	129595	2877.21
C7	8	34815.3	5715.7	26377.8	133033	2241.05
C8	8	35510.4	5434.76	22989.8	116997	2646.1
C9	8	38811.7	8126.9	23553	119325	3326.83
C10	8	32292.5	6016.89	23010.7	126890	2574.74
C11	8	33962.4	6063.48	22337.4	135193	2415.37
C12	8	43999.3	6992.4	21810.9	139853	3053.69
D1	8	43598.9	7259.79	21844.8	135826	3419.14
D2	8	31422.4	5017.89	19945.1	117356	2265.16
D3	8	40072.5	6998.21	25468.4	135922	3820.46
D4	8	31715.8	5484.95	23050.8	118379	3617.4
D5	8	37815.3	6156.56	25132.3	124026	2874.95
D6	8	43266.3	7542.96	27370.8	128917	4819.31
D7	8	30692.8	5317.16	24902	123144	2391.57
D8	8	31576.6	7025.47	25918.4	127445	2480.99
D9	8	43069	8358.6	24446.7	122861	4254.51
D10	8	39248.2	7247.18	24505.3	128133	3688.48
D11	8	39898.3	7736.68	24003.4	132486	3006.74
D12	8	149327	19465.7	29761.2	152282	7365.33
E1	8	46130.8	7148.95	22503.4	140250	3970.98
E2	8	40285.3	7050.94	20496.9	114311	3658.56
E3	8	72471.3	8178.35	25980.1	137796	4936.35
E4	8	34050.8	5939.14	24442.8	127364	2564.52
E5	8	32415.1	5870.28	25432.1	127079	3750.42
E6	8	34369.8	5893.5	25791.9	125739	3435.9
E7	8	43958.2	7670.51	27048.9	128900	5306.21
E8	8	37445.8	7132.21	25804.9	125486	4093.12
E9	8	38865.6	8914.44	29549	129766	3219.45
E10	8	35543.4	6576.11	22859.9	123545	3331.84
E11	8	66898.8	12278.6	25692.5	128629	6214.81
E12	8	62967	10685.6	24458	140763	6016.26
F1	8	44773.8	8173.14	24952.5	153054	7699.88
F2	8	41512.7	6629.38	20726.4	120280	3116.89
F3	8	33322	5392.97	24321.7	138878	3151.64
F4	8	40795.3	6579.34	24266.9	127238	3169
F5	8	30177.3	4997	25157.8	129547	2472.54
F6	8	65755.1	12343.7	30438.4	134276	8333.35
F7	8	34271.5	5809.93	26490.5	132379	3522.05
F8	8	33080.2	5589.27	24208.6	123922	2057.63
F9	8	35072.1	6146.61	24274.9	129170	3603.95
F10	8	35615	6326.88	23523.9	130656	4035.12
F11	8	30563.3	4875.51	21362	128736	2349.09
F12	8	55046.9	9664.89	23633.8	138926	5660
G1	8	43221.1	6973.83	22137.7	148772	3600.94
G2	8	47790.6	7623.6	21117.6	125323	3071.81
G3	8	43288.3	7546.72	25662.9	146197	3063.24
G4	8	31145.2	5066.49	22748.2	125523	2829.28
G5	8	29585	4912.79	24157.3	130082	2703.39
G6	8	30510.6	5277.73	24272.5	127032	2523.11
G7	8	31883.5	5846.76	23829.2	124713	2618.2
G8	8	37214.3	7139.12	24743.1	128544	3704.43
G9	8	39819.1	6757.38	25282.4	137872	2967.03
G10	8	39028.7	7653.27	23789.4	131457	2848
G11	8	86066	14930.6	28219.8	146406	8707.39
G12	8	43839.6	7163.38	23742.4	158465	3338.77
H1	8	57320.9	9477.06	22911.3	150267	6729.97
H2	8	43047.3	7374.2	20929.8	131722	3670.36
H3	8	40302.4	7752.3	25212.9	148266	4864.77
H4	8	36941.4	7030.95	24155.9	134253	2762.36
H5	8	35491	6503.37	25346.6	141248	2675.34
H6	8	44954.5	8263.81	27393.1	146037	4134.31
H7	8	35257	9242.68	27527.1	141159	2491.6
H8	8	37849.8	6643.23	23373.5	127831	2484.74
H9	8	37690.6	6824.27	23743.7	135509	2954.83
H10	8	34059.7	8145.92	5580.99	6777.41	3720.96
H11	8	37613.6	6596.52	4109.96	5806.38	3311.57
H12	8	43847	5890.87	3653.84	5732.37	3004.67
A1	9	19780.8	3755.97	13752.6	98373.5	2893.25
A2	9	31922.2	4697.79	17755.7	115152	2637.85
A3	9	30465.9	4715.11	19076.3	119630	2356.85
A4	9	35131.1	5459.69	17922.8	100679	2911.9
A5	9	35728.6	5787.51	20443.8	113110	3218.84
A6	9	53174.3	9651.63	26401.4	133471	5313.8
A7	9	38838.8	6491.2	22084.5	118371	2997.75
A8	9	193490	30787.2	73845.4	378553	15521.5
A9	9	48067.8	7308.53	23228.4	131337	3266.45
A10	9	33028.4	6223.12	20587.8	125315	3303.38
A11	9	32435.5	5046.7	20975.8	140993	3195.34
A12	9	36442.9	5603.73	18453.2	132626	3118.16
B1	9	34502.7	5868.22	19710.4	131574	3265
B2	9	38889.1	6347.87	19908.7	118869	3562.81
B3	9	30777	5223.2	21198.2	121419	2716.29
B4	9	29857.4	4607.75	20802.8	115987	2868.52
B5	9	33247.9	5081.25	24589.1	138068	3929.11
B6	9	26614.5	4012.95	22359.4	119789	2069.87
B7	9	31353.5	5091.04	23285.8	124085	2785.43
B8	9	113102	16342.6	67304	368935	9639.43
B9	9	39053.2	6567.77	22718.5	124091	2715.18
B10	9	39055.9	6277.41	21239.9	121925	2602.49
B11	9	42186.3	6466.06	22878.6	140957	3713.48
B12	9	44715.2	8023.18	21837.8	142816	4866.19
C1	9	40279.4	6835.78	21618.7	137155	4185.33
C2	9	41602.3	6198.03	26448.4	162555	3975.63
C3	9	35320	4609.61	23284.2	132887	2432.21
C4	9	29926.3	4603.64	21619.5	114578	2890.54
C5	9	31201.3	5005.19	24189.9	123394	3111.46
C6	9	32580	5283.68	25757.7	129926	2929.92
C7	9	34368.6	5796.69	26222.5	132784	2185.81
C8	9	35470.3	5692.74	23027	116716	2936.42
C9	9	39059.7	7932.1	23413.7	119154	3076.6
C10	9	32396.3	6225.35	22888.8	126475	2268.44
C11	9	33759.2	5864.54	22601.2	135314	2237.55
C12	9	43867.1	7016.16	21805.2	139993	2937.52
D1	9	44059.1	6942.63	21948.7	135968	3171
D2	9	31367.9	4964.9	19946.2	117042	2658.01
D3	9	40010.6	6828.58	25465.2	135213	3817.3
D4	9	32094	5595.41	23108.1	117968	4048.82
D5	9	37861	6119.71	25075.6	124499	3060.68
D6	9	43116.6	7749.43	27279.4	128509	4730.15
D7	9	30615.8	5233.41	24853.6	123124	2047.19
D8	9	31664.6	7121.87	25917.5	127516	2274.01
D9	9	43277.3	8189.75	24292.7	123000	4297.55
D10	9	39279.7	7095.26	24665.3	128474	3351.76
D11	9	40372.4	7955.44	23905.5	132635	3209
D12	9	147486	19250.2	29775.4	151985	7552.14
E1	9	46474.3	7019.16	22361.6	139754	4237.39
E2	9	40272.6	6703.21	20296.6	113702	3552.19
E3	9	71774.9	8180.21	25775.9	137242	4980.58
E4	9	33997.8	5763.91	24569.3	127569	2882.86
E5	9	32723.9	5688.93	25519.7	127198	3613.31
E6	9	34043.7	5876.23	25754.6	125676	3526.66
E7	9	43842.2	7852.67	27121.4	128574	5231.42
E8	9	37330.2	6892.16	25885.1	125562	4006.75
E9	9	39184	9103.83	29312.3	129730	3198.87
E10	9	35086.6	6417.09	22813	123289	3229.01
E11	9	66829.4	12070.4	25432.2	128197	6194.73
E12	9	62305.1	10572	24243.2	140266	5901.03
F1	9	45124	8018.77	24626.7	153226	7493.18
F2	9	41329.8	6493.06	20568.9	119728	3018.78
F3	9	33365.5	5586.21	24265.9	138695	3186.77
F4	9	40861.1	6700.82	24282.2	127381	3191.61
F5	9	30426.3	5163	24964	129697	2315.68
F6	9	65789	12179.7	30490.6	134091	8509.52
F7	9	34260	6064.81	26430	132535	3623.46
F8	9	32949.4	5453.16	24153.7	124106	2283.59
F9	9	35174.5	6124.08	24239.3	129076	3854.08
F10	9	35324.9	6043.85	23499.9	130513	4235.17
F11	9	30658.4	5094.84	21279.9	128804	2399.84
F12	9	54793.1	9578.23	23487.2	138308	5526.77
G1	9	43437.5	6968.2	22340.1	148012	3410.19
G2	9	47896.7	7811.67	20882.3	124636	3156.05
G3	9	43627.2	7492.19	25558.6	146026	3180.13
G4	9	31173.4	5179.45	22777	125638	2501.75
G5	9	29867.6	4835.37	24161.9	130222	2757.03
G6	9	30680.4	5284.93	24131	127230	2862.6
G7	9	31974.8	5743.46	23781.7	124357	2710.76
G8	9	37096	6941.76	24645.8	128548	3756.15
G9	9	39747.1	6814.8	25091.5	138312	3045.87
G10	9	38919.8	7639.83	23869.1	131296	2509.17
G11	9	85692.9	14827	28028.2	146310	8728.1
G12	9	43758	7023.85	23723.1	157852	3103.79
H1	9	56607.6	9484.18	23040.5	150078	6917.52
H2	9	42703.7	7353.81	20893.5	131004	3978.14
H3	9	40136.3	7374.59	25307.4	147823	4961.13
H4	9	37357.2	7097.75	24072.9	133944	2902.83
H5	9	35240.4	6250.8	25348.8	141089	2857
H6	9	45174.1	8242.47	27486.1	145709	4314.79
H7	9	35430.7	9386.6	27357.5	140632	2609.07
H8	9	38116.9	6782.38	23276.9	127918	2662.68
H9	9	37842.2	6660.41	23770.5	135621	2811.33
H10	9	34246.7	8158.01	5527.25	6463.97	3767.77
H11	9	37583.4	6381.54	3962.2	5761.33	3402.93
H12	9	44172.6	5921.96	3642.98	5590.73	2910.07
A1	10	19485.9	3472.98	13707	97688.5	3048.94
A2	10	31508.1	4624.92	17599.5	114629	2713.97
A3	10	30975.8	5512.33	19103.7	119338	2571.91
A4	10	35147.7	5595.67	17949	100077	3179.01
A5	10	35845.9	5563.09	20396.1	112571	3149.1
A6	10	53545.3	9361.9	26285.3	132697	5594.19
A7	10	38425.3	6419	21872.1	118114	3619.41
A8	10	192238	30844.1	73478.2	377090	15818.8
A9	10	48248.6	7646.15	23043.1	130956	3416.77
A10	10	32573.4	5560.82	20557.5	125284	3395.11
A11	10	31800	5046.7	20811.5	141362	2494.95
A12	10	35822.7	5617.12	18234.9	131509	2755.58
B1	10	35239.9	5305.93	19912.4	131693	3400.34
B2	10	38695.6	6007.36	19574.6	118665	3264.39
B3	10	31180.8	5210.42	20959.6	120695	2796.53
B4	10	30179.3	4622.48	20906	115884	2830.77
B5	10	33124.7	4956.27	24591.5	137794	3493.48
B6	10	26391	4158.4	22392.2	119792	2065.33
B7	10	31334.5	5240.52	23417.2	124107	2630.09
B8	10	112446	16205.1	67402.5	369039	9028.57
B9	10	38920.1	6680.06	22511.8	123490	2505.19
B10	10	39043.1	6196.42	21032.3	121363	2369.49
B11	10	41778.2	6325.98	22828.1	140731	3274.7
B12	10	44502.6	8151.33	21877.8	141777	5254.13
C1	10	40245.6	6768.3	21455.1	136959	4150.56
C2	10	41652.1	6679.64	26460.2	162681	4809.21
C3	10	35477.6	4602.67	23191.3	132462	2443.46
C4	10	30301.8	4976.5	21499.8	114817	2927.26
C5	10	31296.7	4853.01	23851.2	123637	3056.29
C6	10	32555.1	5287.83	25583	129193	2830.55
C7	10	34502	5512.45	26089.7	132525	1956.59
C8	10	35276.7	5593.18	22874.6	116339	2723.4
C9	10	38950.1	7870.35	23488.8	119006	3171.11
C10	10	32060.2	5840.73	22650.9	126190	2491.2
C11	10	33456.2	5722.43	22414.8	135242	2339.16
C12	10	43731	6918.76	21762.5	139120	3166.31
D1	10	43818.5	7079.61	21814.8	135411	3531.66
D2	10	31624.2	4854.32	19970.9	117012	2510.28
D3	10	39698.6	6912.87	25324.6	134752	3797.29
D4	10	31754.3	5714.05	23065.7	118232	3918.76
D5	10	37624.5	6287.89	25303.5	123799	3182.51
D6	10	42911.7	7696.73	27152.3	128524	4505.42
D7	10	30778.8	5340.48	24997	123228	2731.41
D8	10	31581.6	6908.74	25849.4	127258	2656.27
D9	10	42883.1	8195.05	24316.8	121892	4188.51
D10	10	39172.1	7224.67	24562.8	127963	3555.92
D11	10	39957.6	7620.55	23891.1	132185	3198.57
D12	10	145863	19167.3	29406.5	151368	7506.43
E1	10	46247.3	6937.6	22447.8	139941	4333.89
E2	10	40285.3	6730.29	20294.5	113328	3359.25
E3	10	71486.8	8078.9	25773.1	137138	4982.46
E4	10	33850.1	5823.51	24231.9	127480	2850.93
E5	10	32856.9	5697.78	25409.1	126388	3361.76
E6	10	33976.3	6098.15	25582.7	125366	3712.76
E7	10	43670.2	7507.1	27050.8	128341	5276.86
E8	10	37180.5	7168.31	25712.6	125574	4079.68
E9	10	38791.6	9036	29131.8	129074	3199.81
E10	10	35210.6	6441.96	22688.4	122980	3677.96
E11	10	66309.9	12048.3	25526	128049	6167.02
E12	10	61978.4	10595.4	24323.7	139727	5646.52
F1	10	44853.9	8035.92	24569.1	152426	7361.77
F2	10	41068.6	6453.21	20753.7	119851	2817.46
F3	10	33166.3	5428.75	24160.4	138759	2972.34
F4	10	40883.2	6640.5	24166.4	127045	2898.54
F5	10	30218	5093.37	25028.1	129498	2643.82
F6	10	66155.4	12404.2	30369.9	133716	8328.57
F7	10	33945	5964.26	26517.1	132051	4060.42
F8	10	32840.7	5600.22	24113.3	123952	2308.34
F9	10	35123.3	6015.46	24175.6	129144	3745.18
F10	10	35121.2	6145.84	23502.5	130187	3982.71
F11	10	30438.1	4882.56	21282.9	128099	2327.2
F12	10	54890.2	9607.4	23502	137886	5830.46
G1	10	43168.5	6769.51	22219.5	147683	3898.65
G2	10	47765.5	7881.46	21212.6	124888	3314.67
G3	10	43188.5	7434.02	25528.5	145277	3216.44
G4	10	31153.8	5081.01	22692	125151	2375.97
G5	10	29545.9	5025.84	24213.3	129760	2468.31
G6	10	30684.4	5137.29	24065	126571	2695.09
G7	10	31778.1	5818.11	23757.9	124554	2727.23
G8	10	37273.4	7067.06	24668.3	128359	3613.7
G9	10	39553	6908.21	25153.4	137544	3242.1
G10	10	38835.5	7670.28	23793.8	130925	2901.12
G11	10	84744	14459.9	27908.4	146120	8947.12
G12	10	43832.9	7019	23880.2	157602	3076.41
H1	10	56773.4	9792.07	22643.4	149037	7128.31
H2	10	42933.2	7026.26	20778.9	130623	3253.06
H3	10	40219.3	7543.31	25200.6	147658	4651.32
H4	10	37092.1	6960.03	23979.5	133331	2706.33
H5	10	35370.5	6201.04	25277	140827	2921.55
H6	10	45162.9	8270.67	27375.8	145357	4265.08
H7	10	35432.9	9410.98	27471.1	140269	2607.49
H8	10	37731.5	6810.34	23269.3	127409	2790.6
H9	10	37581.5	6718.24	23663.5	135775	2638.96
H10	10	34067.8	8280.91	5457.88	6842.5	3776.73
H11	10	38041.8	6483.86	4023.49	6120.57	3316.08
H12	10	43967.7	6071.49	3626.68	5661.55	2983.49
A1	11	19703.8	3516.51	13323.4	97514.6	2626.56
A2	11	32281.8	4798.19	17323.7	114223	2301.54
A3	11	30710.3	5014.96	19188.5	119284	2601.92
A4	11	35117	5455.08	17807.5	99749.9	2966.8
A5	11	35561.8	5452.94	20450	112294	3321.98
A6	11	53106.1	9534.9	26108.1	132305	5478.06
A7	11	38564.6	6509.49	21924.9	118059	3579.73
A8	11	190931	30644.9	73469.5	375904	15279.4
A9	11	47978	7405.14	23189.7	130515	3535.44
A10	11	32697.9	5998.19	20671.7	124978	3349.8
A11	11	31632.5	5135.31	20915.6	141199	2681.95
A12	11	35800.8	5329.94	18183.4	131219	3113.9
B1	11	34948.1	5752.57	19619.4	131022	3618.57
B2	11	38661.1	6196.2	19693.5	118073	3261.78
B3	11	30975.5	5172.09	20827.1	120767	2410.68
B4	11	29904.2	4816.21	20761.5	115593	2764.99
B5	11	33352.5	5152.37	24723.3	137550	3384.88
B6	11	26384.5	4012.95	22370.6	119736	2177.76
B7	11	31208.7	5228.28	23400	123719	2424.16
B8	11	112867	16248.2	66622.8	369013	8558.21
B9	11	39043.6	6669.11	22575.4	123043	2759.39
B10	11	38934	5897.17	21127.6	120579	2264.84
B11	11	41999.5	6390.18	22651.1	140678	3192.72
B12	11	44181.3	8000.14	21658.1	140928	5263.97
C1	11	39841.2	6791.61	21378	136587	3893.74
C2	11	40516.4	5799.8	26379	162567	4594.86
C3	11	35697.7	4473.15	23111.3	131995	2155.46
C4	11	29764.5	5041.15	21510.9	114840	2973.69
C5	11	31248.5	5132.66	23963.8	123031	2831.61
C6	11	32639.3	5463.1	25630.1	128995	2770.93
C7	11	34385.5	5714.91	26162.4	132753	1986.27
C8	11	35663.1	5608.77	22974.4	116307	2710.81
C9	11	38487.4	7954.71	23533.1	118455	3161.21
C10	11	32234.2	6127.48	22772.8	125738	2512.09
C11	11	33678.7	5867.81	22188.1	134721	2349.1
C12	11	43505.1	7071.98	21672.7	138884	3213.73
D1	11	44049.2	7304.04	21854.8	135269	3315.26
D2	11	31366.8	5122.72	19914.9	116430	2743.36
D3	11	39494.3	6795.91	25326.7	134826	3642.45
D4	11	31482	5603.59	23125	118160	4035.08
D5	11	37985.9	6110.26	25043.8	123740	3051.7
D6	11	43011.7	7568.01	27259.3	128230	4954.87
D7	11	30537.1	5268.81	24904.7	122806	2130.1
D8	11	31676.3	7050.24	25871.8	127756	2591.94
D9	11	43098.9	8281.69	24302	122030	4009.64
D10	11	39241.7	7241.55	24487.1	127518	3572.37
D11	11	40090.9	7818.58	23748.9	132323	3218.38
D12	11	144823	18943.1	29217.3	150985	7721.07
E1	11	46059.9	6929.56	22330	139609	4308.72
E2	11	40089.6	6834.29	20175.4	113228	3500.04
E3	11	71142.6	7926.47	25764.7	137236	4818.73
E4	11	33784.8	5819.06	24471.2	127519	2802.1
E5	11	32702	5672.13	25287.4	126615	3739.08
E6	11	34249.1	6081.74	25851	125409	3560.58
E7	11	43475.5	7746.41	26979.2	127916	5203.97
E8	11	37351	6919.23	25710.7	125779	4087.36
E9	11	39027.7	9053.62	29337.7	128663	3000.64
E10	11	35136.3	6476.61	22659.5	122820	3178.51
E11	11	65910.8	12158.1	25500.1	127588	6137.38
E12	11	61657.8	10515.9	24127.7	139389	5717.81
F1	11	44708.5	7951.59	24741.8	152031	7754.74
F2	11	41236.8	6480.47	20372.9	119305	2983.01
F3	11	33628.3	5661.36	24110.8	138525	2981.35
F4	11	40937.2	6668.98	24218.3	126993	3186.39
F5	11	30441.4	5187.3	24975.7	129304	2445.41
F6	11	65918.5	12318	30270.2	133427	8372.41
F7	11	33665.9	5905.02	26405.9	131945	3404.98
F8	11	32854.7	5486.01	24077.8	123605	2073.3
F9	11	34849.1	6119.26	24188	129076	3824.31
F10	11	35103.6	6186.64	23330.2	129842	4243.91
F11	11	30452.6	4803.07	21275	127661	2337.15
F12	11	54646.6	9436.67	23515.9	137465	5613.66
G1	11	43500.4	6800.51	22036.6	147114	3777.5
G2	11	47481.8	7552.62	21042.5	125088	3087.13
G3	11	43259.5	7261.35	25407.4	145177	3177.48
G4	11	31248.5	4895.43	22684.8	124862	2607.12
G5	11	29610.1	5151.27	24080.2	129651	2619.77
G6	11	30589.8	5304.38	24147.1	126618	2663.82
G7	11	31664.8	5692.94	23604.7	124067	2829.2
G8	11	37291.8	7023.65	24627.5	128114	3757
G9	11	39568.3	6679.4	25049.3	137750	3089.67
G10	11	38676.6	7554.76	23748.2	130600	2861.74
G11	11	84347.8	14293.2	27728.7	145664	8647.46
G12	11	43201.7	6912.23	23661.6	157672	2978.32
H1	11	56582.6	9760.04	22772.6	148540	7055.46
H2	11	42836.6	7135.87	20912.2	130257	3643.84
H3	11	40332.6	7670.66	25057.9	147156	4747.69
H4	11	37359.6	7089.5	23919.7	133422	2697.4
H5	11	35479.8	6343.53	25245.9	140242	2894.53
H6	11	44992	8275.24	27198.7	144318	4157.25
H7	11	35437.4	9462.11	27361.4	139708	2854.34
H8	11	38141.3	6658.61	23203.3	127059	2638.38
H9	11	37820.6	6825.14	23711	135681	2917.21
H10	11	34732.3	8552.91	5626.91	6677.27	3920.15
H11	11	38102.1	6447.07	4076.03	5995.57	3002.52
H12	11	43870.2	5944.17	3799.12	5313.1	2983.49
A1	12	18879	3692.34	13306.1	96843.6	2864.42
A2	12	31372.5	5058.91	17325.2	113961	2931.25
A3	12	30456.2	4749.22	19245.9	118738	2340.6
A4	12	34958.3	5315.65	17795	100266	2855.94
A5	12	35231.4	5590.89	20340.2	112314	3188.39
A6	12	53010.3	9382.75	26253.1	132156	5465.51
A7	12	38154.4	6179.29	21865.2	117863	3609.02
A8	12	191337	30346	73046.9	375314	14494.7
A9	12	48100	7445.81	23091	130452	3491.93
A10	12	32569.4	5613.07	20404.1	124820	3384.06
A11	12	31895.9	5215.53	20824.2	141424	2960.71
A12	12	35917.6	5731.7	18058.2	130916	2947.54
B1	12	35272.8	5539.22	19473.8	130927	3295.45
B2	12	38369.2	6331.52	19468.5	117826	2898.21
B3	12	31002.9	4940.83	21053	120506	2708.03
B4	12	30102	4527.31	20790.2	115919	2825.38
B5	12	32927.6	5255.8	24493.8	137416	3582.78
B6	12	26273.6	4314.69	22295.7	119947	2060.8
B7	12	31241.3	5330.55	23302.1	124250	2654.94
B8	12	112908	16156.5	66307.5	368929	8542.93
B9	12	38699.8	6259.19	22538.9	123114	2859.78
B10	12	38735.1	5998.9	21001.5	120500	2457.36
B11	12	41198.6	6553.61	22618.9	140660	3347.45
B12	12	43946	7916.63	21825.3	141036	4961.77
C1	12	40091.6	6735.17	21305.4	135904	4140.47
C2	12	40629.6	6039.76	26455.1	161568	4045.38
C3	12	35332.7	4345.94	23083.4	131973	2550.33
C4	12	30010.9	4680.15	21348.1	114522	2637.88
C5	12	31426.9	4930.08	23895.6	123430	2856.69
C6	12	32870.3	5035.32	25572.5	128780	2916.09
C7	12	34378.6	5557.71	26221.6	132756	2126.44
C8	12	35420	5618.29	22930.8	116338	2836.65
C9	12	38408.4	7918.18	23306.1	118561	3054.09
C10	12	32219.3	6033.53	22584	125495	2748.78
C11	12	33671.9	5606.56	22100.9	134426	2197.8
C12	12	43656.6	6623.01	21586.3	138660	2906.7
D1	12	44083.4	7199.73	21876.8	135164	3324.88
D2	12	31364.4	5001.77	20066.1	116567	2962.22
D3	12	39259.5	6729.53	25297.1	134492	3813.09
D4	12	31843.8	5521.77	23060.4	117604	3994.9
D5	12	37811.8	6254.82	25127.4	124144	2739.14
D6	12	42966.1	7584.42	27219.1	127842	4824.77
D7	12	30201.4	5318.89	24842.6	123126	2337.82
D8	12	31590.7	7335.01	25846.7	127414	2642.29
D9	12	42627.1	8274.61	24166.5	121867	4238.25
D10	12	39253.7	7260.31	24561.8	127615	3407.88
D11	12	39775.5	7832.06	23950.9	132128	2946.27
D12	12	143713	18823.1	28996.8	150136	7246.08
E1	12	46416.6	6995.03	22086.8	139304	4087.41
E2	12	40142.5	6586.22	20251.3	113633	3550.1
E3	12	70977.6	7966.44	25820.7	136667	4884.6
E4	12	33616	5889.33	24378.6	127313	2813.37
E5	12	32713.4	5562.43	25270.8	126524	3292.73
E6	12	34039.8	5813.19	25652.7	125627	3381.82
E7	12	43592.3	7615.15	26958.5	127895	4919.01
E8	12	37168.9	6652.1	25755	125784	3962.6
E9	12	38904.6	8984.92	29123.6	128738	2906.2
E10	12	35292.7	6394.88	22731.7	122516	3070.17
E11	12	65032.4	12202.5	25405.4	127930	6176.57
E12	12	61655.2	10530.2	24114.6	138781	5819.78
F1	12	44858.4	8251.75	24573.1	152161	7920.6
F2	12	40884.7	6455.3	20557.7	119363	2960.53
F3	12	33442.1	5437.7	24213.6	138333	2969.64
F4	12	40951.4	6781.25	24098.2	127274	3086.38
F5	12	30540.3	4911.98	25000.6	129275	2587.01
F6	12	66034.9	12307.4	30319.3	133455	8257.62
F7	12	33753	5697.69	26277.7	131763	3598.72
F8	12	33050.8	5478.19	23993.8	123625	2448.53
F9	12	34977.2	6100.75	24304.7	128574	3853.23
F10	12	35163.9	6156.89	23317.4	129635	4118.99
F11	12	30981.1	4911.73	21261.1	127580	2294.37
F12	12	54483.5	9710.36	23372.6	137494	5523.46
G1	12	42843.9	6924.51	21947	147271	3778.79
G2	12	47202.8	7845.98	21010.4	125009	3075.09
G3	12	43495.9	7478.56	25343.7	144322	3284.63
G4	12	30962	5069.71	22699.2	125144	2244.47
G5	12	29458	4888.02	24098.9	129898	2682.88
G6	12	30405.4	5133.69	24104.6	126625	2502.26
G7	12	31846.7	5824.9	23613.9	124208	2611.93
G8	12	37178.9	6980.25	24655.8	128189	3592.51
G9	12	39647.1	6627.12	25059.6	138075	2689.34
G10	12	38789	7459.83	23728.5	130342	2649.28
G11	12	84189.1	14079.3	27782.1	144846	8866.48
G12	12	43421	6821.23	23709.4	157251	3103.79
H1	12	57039.5	9491.3	22663.9	148186	7323.61
H2	12	42864.8	7162.63	20685.3	129774	3684.19
H3	12	40176.2	7345.2	24964.5	146316	4507.3
H4	12	37132.6	7087.85	23875.8	133076	2787.53
H5	12	35295.4	6328.45	25128.2	140116	2670.83
H6	12	44982.3	8349.93	27011.9	143765	4088.42
H7	12	35605.2	9659.51	27193.4	139500	2658.29
H8	12	37960	6692.88	22964.5	126592	2541.91
H9	12	37426.4	6649.89	23578.2	135540	2655.59
H10	12	34628.7	8338.33	5632.77	6889.56	3684.1
H11	12	38191.4	6756.32	4204.09	5893.09	3042
H12	12	43688.4	6221.02	3561.51	5645.97	3566.64
A1	13	19619.3	3844.72	13549.8	96793.9	2867.3
A2	13	31862	4487.27	17095.4	113825	2889.73
A3	13	30345.4	5226.7	19068.1	118620	2563.16
A4	13	35134.9	5346.77	17857.7	99502.7	2537.09
A5	13	35402.8	5584.71	20354.7	111487	3340.64
A6	13	52939.9	9414.01	26085.5	131806	5527.23
A7	13	38029.1	6406.48	21839.7	117685	3334.09
A8	13	190305	30431.4	73347.1	374167	15506.2
A9	13	47945.7	7393.95	23020.7	130150	3455.34
A10	13	32632.4	5934.57	20487	125003	3254.76
A11	13	31615.3	5065.86	21053.3	140984	2601.8
A12	13	35720.6	5493.62	18239	130409	2815.3
B1	13	34320.6	5459.46	19413.7	131062	3934.92
B2	13	38580.8	6090.63	19554.8	117605	3304.79
B3	13	31050.8	5049.43	20747.5	120236	2738.71
B4	13	30199.2	4527.31	20877.3	115977	2921.36
B5	13	33232.5	5195.46	24422	137383	3522.44
B6	13	26318.9	4088.83	22381.9	119506	2096.16
B7	13	31365.3	5329.68	23224.2	124034	2575.94
B8	13	112558	15943.4	66690.3	368044	8585.69
B9	13	38878.9	6537.64	22615.6	122965	2642.42
B10	13	38880.5	6156.92	20956.8	120619	2395.16
B11	13	41761.5	6478.9	22705.1	140386	3118.82
B12	13	43986.5	7874.87	21680.3	140661	4724.22
C1	13	39678.4	6746.21	21257	135654	3991.31
C2	13	40564.4	5755.56	26150.5	161529	4263.13
C3	13	35379.1	4455.8	23018.4	131355	2485.08
C4	13	29973.9	4794.38	21444.5	114964	2844.11
C5	13	31079.8	4814.47	24019.5	122948	2927.9
C6	13	32576.8	5482.2	25798.7	129007	2506.54
C7	13	34596.1	5729.2	26103.1	132489	2095.94
C8	13	35696.4	5438.23	23028.8	115990	2867.21
C9	13	38515.4	8018.19	23433.6	117856	2928.08
C10	13	32150.1	5847.58	22609	125306	2539.93
C11	13	33229.2	5887.49	22233.9	134765	1985.75
C12	13	43303.5	6840.37	21472.2	138464	2717.03
D1	13	43835.1	7254.52	21919.7	134993	3392.21
D2	13	31449.1	5008.68	19804	116277	2406.32
D3	13	39673.1	6747.45	25215.6	134089	3567.66
D4	13	31784.2	5394.95	22852.7	117777	4230.7
D5	13	37790.7	6067.74	25020.9	123807	2782.08
D6	13	42839.6	7547.28	27277.6	128022	4872.99
D7	13	30557.1	5162.6	24855.4	122953	2314.13
D8	13	31657.2	7170.51	26060.9	127350	2661.87
D9	13	42634.6	8292.29	24309.4	121597	4215.29
D10	13	39053.5	7297.82	24374	127467	3482.39
D11	13	40202	7869.39	23742.7	131636	2659.57
D12	13	142175	18603.7	29058.3	150168	7222.23
E1	13	46117.6	6876.73	22316.9	139115	3972.03
E2	13	40156.2	6429.15	20226	112985	3493.78
E3	13	70365	8029.64	25670.5	136903	5210.18
E4	13	33342.7	5732.78	24352	127229	2924.17
E5	13	32419.1	5641.16	25457	126314	3476.19
E6	13	33783.5	5928.9	25712.8	126066	3805.35
E7	13	43285.6	7623.18	26968.8	128225	5212.49
E8	13	36729.7	6853.35	25727.7	125677	3634.38
E9	13	38556.3	9014.86	29114.5	128536	2894.04
E10	13	35027.2	6510.37	22773.2	122688	3248.29
E11	13	64630.3	11789.1	25259	127533	6288.41
E12	13	61189.8	10331.2	24025.9	138624	5632.42
F1	13	44574.9	8057.36	24493.2	151853	7974.19
F2	13	40701.9	6607.35	20509.3	119153	2845.05
F3	13	33364.7	5614.84	24107.3	138199	2554.28
F4	13	41025.2	6567.61	24253.3	126882	2947.24
F5	13	30319.9	4790.52	24979.8	129129	2484.41
F6	13	65857.6	12330.9	30280.3	133190	8333.35
F7	13	33637.2	5928.41	26223.7	131867	3578.11
F8	13	32865	5572.06	24043.1	123494	2318.23
F9	13	34813	6054.08	24136.7	128935	3568.22
F10	13	35080.9	5966.51	23241.1	129181	4126.85
F11	13	30031.6	4863.44	21114.6	127399	2530.18
F12	13	54286.5	9416.94	23290.7	137245	5787.43
G1	13	43555.9	6948.47	22028.8	147134	3822.61
G2	13	47397.1	7756.08	20898.8	124625	2697.68
G3	13	43091.4	7397.67	25383.5	144044	3194.3
G4	13	31040.3	5100.38	22638.2	124770	2489.5
G5	13	29498.6	4829.17	23982.1	129875	2466.73
G6	13	30536.6	5346.87	24163.2	126301	2599.05
G7	13	31717.9	5867.12	23643	124417	2444.07
G8	13	37209.6	7235.75	24515.2	127971	3790.91
G9	13	39278.4	6670.83	25043.3	137570	3140.48
G10	13	38608.2	7489.38	23569.9	130232	3070.53
G11	13	83490.5	14024.1	27700.4	144882	8707.39
G12	13	43094.7	6839.43	23786.8	157526	2969.19
H1	13	56754.1	9639.02	22652.8	147794	6827.62
H2	13	42956	7277.34	20763.7	129751	3657.68
H3	13	40102.9	7635.83	24934.8	146239	4616.09
H4	13	37481.2	7094.45	23986.7	133007	2489.53
H5	13	35598.8	6485.27	25168.2	139851	2875.76
H6	13	45093.2	8336.21	27076.4	143803	4256.67
H7	13	35760.2	9578.5	27198.8	138802	2704.32
H8	13	37985.7	6664.21	22945	126308	2729.86
H9	13	37652.5	6712.11	23786.8	135587	2649.46
H10	13	34875.6	8352.44	5696.28	6832.48	3435.11
H11	13	38490.6	6434.42	4198.62	6175.75	3457.07
H12	13	43764.4	5994.5	3702.72	5613.39	3288.48
A1	14	19021.8	3565.07	13479	96624.6	2410.32
A2	14	31670	4532.62	17417.1	113790	2480.07
A3	14	30234.6	4628.42	19090	118885	2388.11
A4	14	35247.5	5586.45	17647.8	99609.9	2602.55
A5	14	35309.2	5516.77	20330.9	111903	3181.52
A6	14	52813.3	9396.29	25971.6	131508	5631.86
A7	14	38219.7	6474.83	21770.2	117547	3459.74
A8	14	189531	30158.2	72636	374253	15196.6
A9	14	47417.2	7380.73	23057.4	130018	3196.23
A10	14	32678.3	5814.15	20366.1	124448	3270.23
A11	14	31712.7	5021.56	20796.4	141230	2716.8
A12	14	35266.4	5520.41	17994.3	129928	2910.57
B1	14	34344.7	5369.73	19384.6	130452	3190.56
B2	14	38402	6350.85	19553.4	117621	3461.17
B3	14	31075.4	5054.54	20895.2	119856	2400.06
B4	14	29609.3	4501.25	20895.7	116016	2883.61
B5	14	32917.7	5083.41	24452.6	137020	3660.01
B6	14	26305	4010.24	22281.6	119300	2007.31
B7	14	31055.7	5127.75	23202.5	123984	2540.44
B8	14	111306	15927.3	66634	368687	8585.69
B9	14	38942.1	6472.82	22426.7	122456	2738.21
B10	14	38456	5870.5	20845.6	120368	2524.49
B11	14	41679.7	6315.47	22454.6	139954	3353.22
B12	14	43897.3	7928.14	21325.2	140010	4847.91
C1	14	40029	6515.53	21168.3	135612	3632.44
C2	14	40444.3	6301.84	26155.6	161430	4389.02
C3	14	35596.9	4614.24	22898.9	131534	2266.83
C4	14	29960.1	4847.18	21662.7	114596	3339.73
C5	14	31370	4614.85	24003	123118	2803.52
C6	14	32582.4	5433.2	25495.6	128534	2804.63
C7	14	34449.6	5410.82	25912.7	132492	2138.81
C8	14	35254.5	5375.03	22743.1	115717	2739.58
C9	14	38444.9	7952.1	23295.3	118083	3194.51
C10	14	32142.2	6001.24	22412.1	124815	2126.22
C11	14	33606	5870	22257.9	134327	2184.54
C12	14	43077.6	6734.66	21367.3	138223	2733.62
D1	14	43561.4	7208.16	21896.7	135120	3387.4
D2	14	31613.8	4772.53	19901.4	116097	2401.94
D3	14	39281.9	6773.79	25052.8	134070	3838.37
D4	14	31733.2	5546.32	22876	117473	4038.25
D5	14	37971.8	6175.45	25060.7	123498	2656.25
D6	14	42737.9	7636.26	27008.8	127464	4855.7
D7	14	30456	5298.17	24942.2	122917	2400.69
D8	14	31621.5	7304.94	26146.6	128046	2991.92
D9	14	42674.7	8286.99	24148.8	121201	4207.64
D10	14	39136.9	7133.71	24353.9	126998	3774.6
D11	14	39840.1	7750.16	23744.8	131382	2929.59
D12	14	141706	18572.5	28876.7	149950	7170.56
E1	14	45746.5	7128.27	22261.3	138973	4272.01
E2	14	39944.6	6331.66	20213.3	112886	3232.01
E3	14	70135	7813.07	25663	136711	4869.55
E4	14	33740	5827.96	24484	127279	2984.27
E5	14	32673.7	5489.9	25144.5	125962	3431.74
E6	14	33791.4	5819.23	25609.1	125790	3509.24
E7	14	43523.3	7639.26	26936.8	127683	5112.14
E8	14	36792.1	6875.01	25712.6	125574	3823.44
E9	14	38850.6	9071.24	29030.2	128143	3260.59
E10	14	35288.3	6402.87	22487	122544	3232.68
E11	14	64618.6	11906.6	25107.8	127356	6353.4
E12	14	61370.8	10250.1	24052	138591	5644.86
F1	14	44919.2	8193.15	24457.9	151725	7581.22
F2	14	40602.6	6691.24	20391.1	118823	3030.02
F3	14	33708.3	5402.81	24155.1	138431	2825.48
F4	14	40574.9	6599.45	24037.7	127269	3134.22
F5	14	30113.1	5022.11	24929.1	128998	2542.92
F6	14	66124.3	12214.5	30238.3	132868	8139.65
F7	14	33707.7	5784.21	26096.3	131500	3687.76
F8	14	32621.8	5456.28	23995.4	123488	2408.12
F9	14	34871	6273.75	24140.8	128567	3599.7
F10	14	34679.3	5998.81	23242	128926	4067.44
F11	14	30349.2	4825.21	21318.5	127021	2323.22
F12	14	54486.2	9448.68	23305.4	136725	5870.18
G1	14	43487.2	6921.7	21880.9	146781	3798.12
G2	14	47709.5	8029.32	20949.7	124641	2750.19
G3	14	43910.3	7512.18	25276.6	143805	3017.18
G4	14	30879	5227.87	22617.4	124478	2310.63
G5	14	29606.4	4830.72	23990.7	129360	2383.9
G6	14	30451.3	5174.74	23970.4	126360	2290.08
G7	14	31808.5	5769.85	23643	123764	2728.01
G8	14	37250.3	7067.06	24419.5	127773	3895.2
G9	14	39370.8	6829.37	24968.5	137436	3011.71
G10	14	38670.5	7487.59	23540.3	129928	2858.99
G11	14	83598.2	14075.9	27593.7	144273	8621.31
G12	14	43205.7	6953.48	23699.2	157706	3111.77
H1	14	57255.4	9233.24	22509.4	147196	6725.32
H2	14	43419.2	7205.97	20736.8	129564	3502.05
H3	14	40635.5	7692.43	24717.2	145866	4980.82
H4	14	37911.5	7096.1	23733.7	132347	2907.7
H5	14	35783.2	6305.84	25163	139415	2871.26
H6	14	45190.6	8561.04	26969.9	143436	4180.96
H7	14	36191.5	9657.15	27038.6	138578	2606.69
H8	14	38472.7	6943.89	22824.2	126431	2577.64
H9	14	38038	6882.98	23621.3	135297	2901.46
H10	14	34937.5	8612.35	5691.4	6715.32	3757.81
H11	14	38263.8	6582.72	4197.52	5881.83	3344.28
H12	14	44285	6010.79	3462.39	5613.39	3123.28
A1	15	19386.3	3670.57	13497.9	96219.2	2897.58
A2	15	31425.2	4798.19	17351.3	113848	2781.78
A3	15	30420.3	4858.64	19027.1	118830	2545.65
A4	15	34789.3	5456.24	17775.6	99921.4	2935.12
A5	15	35116.3	5595.01	20346.4	111691	3517.45
A6	15	52643.8	9502.6	25859.9	131263	5411.1
A7	15	38019.4	6354.5	21733	117864	3174.42
A8	15	189045	29358.5	72604	373392	15843.3
A9	15	47893.9	7494.63	22955.6	130002	3348.53
A10	15	32513	5785.75	20295.5	124178	3106.66
A11	15	31581	5213.13	20821.9	141026	2645.94
A12	15	35490.7	5423.69	17881.6	129405	3126.69
B1	15	34722.1	5640.91	19402.8	130389	2821.77
B2	15	38593.9	6054.94	19440.2	117054	3428.59
B3	15	30960.4	5174.64	20646.6	120028	2426.02
B4	15	29988.5	4570.36	20798.2	115733	2768.23
B5	15	33225.9	5178.23	24356.1	136882	3801.2
B6	15	26284.7	3998.49	22422.2	119782	1835.05
B7	15	31695.8	5313.07	23244.2	123972	2421.49
B8	15	111315	15822.1	66698.8	368667	8915.56
B9	15	38828.1	6552.25	22559.5	122597	2877.28
B10	15	38473.1	6007.78	21042.2	119801	2258.91
B11	15	41556.8	6379.68	22522.4	140360	3040.3
B12	15	43340.6	7693.44	21468.9	139594	4448.72
C1	15	39903.8	6482.4	21328.4	135621	4111.31
C2	15	40751.4	6386.93	26186	161268	4360.1
C3	15	35548.2	4336.69	22954.6	131016	2033.96
C4	15	29931.6	4597.17	21412.3	114618	3355.93
C5	15	31237	4854.98	23972	123136	2905.84
C6	15	32580	5397.48	25617	128492	2645.65
C7	15	34449.6	5524.36	26110.6	132989	2202.3
C8	15	35623	5513.54	22689.5	115656	2676.66
C9	15	38337.1	7909.48	23382.1	117771	3252.12
C10	15	31996.9	6090.29	22270.2	124475	2573.75
C11	15	33290.5	6056.92	22370.1	134078	2081.83
C12	15	43109.7	7071.98	21450.3	138345	2903.14
D1	15	43596.7	7297.72	21924.7	135161	3153.68
D2	15	31543	4993.7	19852.1	116134	2411.79
D3	15	39465.8	6652.62	25209.3	133799	3786.76
D4	15	31789	5494.16	22841	117586	4174.65
D5	15	37727.4	6332.3	25039.8	123618	2854.97
D6	15	42749.2	7422.01	27159.6	127713	4599.14
D7	15	30463.2	5057.26	24808.8	123038	2658.52
D8	15	31829.1	7491.54	26167.1	128487	2547.19
D9	15	42190.8	8309.98	24000.4	121269	3889.12
D10	15	39085	7159.97	24403.7	126953	3734.93
D11	15	39451.7	7822.73	23780.8	131493	3195.45
D12	15	140361	18611.5	28840.8	149545	7166.59
E1	15	45819.7	6923.82	22097.7	139102	4327.6
E2	15	39310.9	6839.7	20085.8	112996	3500.04
E3	15	69978.9	8023.13	25656.5	136577	4908.13
E4	15	33427.5	5770.14	24308	127619	3073.48
E5	15	32817.1	5641.16	25328	126322	3674.77
E6	15	33792.9	5673.3	25645.5	126047	3445.07
E7	15	43335.1	7699.98	26919.8	127758	5166.1
E8	15	36735.5	6847.93	25603.2	125624	3550.89
E9	15	38863.9	8716.25	29061	128167	3248.43
E10	15	34882.2	6286.49	22782.3	121947	3419.06
E11	15	63925	11765.9	25199.7	127627	6094.37
E12	15	61025.2	10350.4	24046.3	138677	5900.2
F1	15	45156.7	7918.71	24329.7	151621	7479.15
F2	15	41248.3	6403.92	20503.2	118692	2879.8
F3	15	34251.2	5618.42	24008.1	138322	2840.8
F4	15	40534.4	6788.79	24122.9	127060	2827.23
F5	15	30561.4	5097.41	24847.6	128662	2317.37
F6	15	65976	12231.1	30235.1	132881	8168.34
F7	15	33606.2	5986.86	26117.2	131615	3410.75
F8	15	32917.8	5536.08	24060	123556	2615.95
F9	15	34898.1	6228.69	24135.9	128891	3604.8
F10	15	34956.8	5905.31	23137.4	128895	3837.69
F11	15	30411.2	4935.88	21040.4	126797	2275.47
F12	15	54193.1	9518.17	23194.1	136541	5754.33
G1	15	44497.5	7266.94	21843.3	146345	3527.47
G2	15	48210.3	7939.42	20927.6	124910	3305.92
G3	15	44135	7558.53	25242.1	143275	3079.18
G4	15	31012.1	5039.05	22583.7	124643	2806.41
G5	15	29509.7	4901.18	23951.7	129330	2579.54
G6	15	30517.9	5177.62	23854.6	126153	2555.12
G7	15	31543.1	5864.11	23603.2	123881	2690.36
G8	15	37046.9	7157.95	24432.8	127730	3461.93
G9	15	39273.3	6696.54	25088	137706	2883.81
G10	15	38698.6	7582.52	23596.8	129710	2680.42
G11	15	83141.7	14044.3	27647	144544	8610.42
G12	15	42954.2	6914.65	23706	157893	2809.49
H1	15	57170.5	10030.6	22348.7	146648	6711.37
H2	15	43687.7	7259.5	20619.8	129336	3385.63
H3	15	41019.4	7616.23	24783.9	145356	4769.44
H4	15	38764.2	7137.33	23852.6	132626	2672.23
H5	15	36726.1	6367.66	25069.7	139275	2935.82
H6	15	46229.2	8634.21	26969.1	143010	3980.59
H7	15	36678.2	9777.48	27198.8	138462	2626.54
H8	15	39249.7	6794.26	22890.9	126486	2676.97
H9	15	38946.8	6903.13	23392.8	135629	3053.7
H10	15	34838	8453.18	5643.52	6741.36	3730.91
H11	15	38360.3	6742.52	4208.47	6178	3319.47
H12	15	43544.6	5732.46	3752.96	5352.76	3439.56
A1	16	19110.1	3695.69	13378.4	95889.9	2504.02
A2	16	31449.7	4715.61	17188.9	113242	2248.95
A3	16	30483.9	4646.9	19146.1	118626	2564.41
A4	16	34948	5612.95	17735.7	99023.1	3233.92
A5	16	35306.9	5713.39	20178.6	111489	3284.65
A6	16	52340	9224.33	25810.4	131658	5651.73
A7	16	37870.6	6331.4	21734	117565	3311.42
A8	16	188811	29102.4	72519.4	372835	14902.4
A9	16	47372.3	7306.5	22883.3	129449	3516.65
A10	16	32380.6	5822.1	20363.8	123733	3214.97
A11	16	31622.5	4837.17	20680.7	140796	2909.61
A12	16	35395.9	5262.99	18013.7	128930	3034.27
B1	16	35013.9	5648.89	19340.9	129768	3664.24
B2	16	38859.6	6075.76	19597.3	117421	3510.69
B3	16	30952.2	5161.87	20890.2	119925	2338.7
B4	16	29768.5	4682.52	20622.7	115433	2546.08
B5	16	33067.4	5162.06	24332.5	136782	3564.68
B6	16	26172.9	3991.27	22307.8	119591	2029.98
B7	16	30976.9	5292.09	23202.5	123665	2561.74
B8	16	111813	15843.6	66648.1	368479	7858.77
B9	16	38823.3	6547.68	22384.6	122125	2488.61
B10	16	38354.4	6206.3	20962.8	119612	2106.87
B11	16	41332.9	6293.29	22609.7	139862	3160.39
B12	16	43619.8	7700.64	21257.5	138848	4987.07
C1	16	39529.4	6705.72	21281.2	135134	3890.38
C2	16	40495.8	6220.15	26260.5	160452	4208.69
C3	16	35162.4	4459.27	22927.9	130771	2518.83
C4	16	30299.6	4668.29	21235.1	114793	2881.91
C5	16	31147.3	4991.35	24050.5	123334	2821.58
C6	16	32576.8	5240.49	25558.5	128455	2872.03
C7	16	34128.6	5601.37	26066.3	132690	1972.26
C8	16	35360.3	5611.36	22765.7	115338	2544.53
C9	16	38734.5	7856.44	23298.9	117510	2647.24
C10	16	32037.4	6038.42	22282.2	124035	2377.83
C11	16	33393.8	5659.03	21972.3	133810	2279.52
C12	16	42532	6746.53	21275.1	137611	3024.06
D1	16	43964.2	6960.54	21783.8	134615	3186.38
D2	16	31354	4846.25	19762.5	115755	2951.27
D3	16	39002.4	6596.78	25124.7	133767	4402.96
D4	16	31606.1	5630.18	22955.5	117562	3751.69
D5	16	37930.5	6328.52	24957.2	123544	3135.58
D6	16	42665.1	7578.38	26958.5	126931	4904.83
D7	16	30300.2	5174.69	24849.9	122848	2178.38
D8	16	31922.1	7351.81	26101.9	128158	2779.34
D9	16	42231.9	8255.17	24014.3	120774	4106.25
D10	16	38889.3	7000.54	24370.2	126622	3527.86
D11	16	39726.8	7887.01	23744.8	131132	3179.81
D12	16	140021	18353.1	28799.1	148970	6934.06
E1	16	45917	6777.95	22263.4	139191	3967.84
E2	16	39586	6904.7	20118.5	112507	3593.9
E3	16	69497.4	7977.59	25690.1	136593	4831.91
E4	16	33311.7	5861.76	24446.4	127535	3164.57
E5	16	32699.6	5663.28	25150	125934	3396.75
E6	16	33722.4	5772.6	25707.3	125906	3589
E7	16	42973.3	7638.36	26728.6	127308	4945.52
E8	16	36729.7	7111.46	25647.5	125691	3860.87
E9	16	38661.9	8921.49	29078.2	127785	3020.28
E10	16	34895.3	6303.37	22673	122065	3515.46
E11	16	63766.5	11767.9	24979.6	126794	6289.36
E12	16	60717.5	10216.7	23917.7	138111	5543.72
F1	16	46398.8	8158.84	24484.1	151271	7421.74
F2	16	41683	6689.15	20398.2	118201	3135.28
F3	16	34687.1	5740.09	23988.6	138197	3112.89
F4	16	40517	6589.39	24143.3	127008	3269.88
F5	16	30101.8	4793.76	24746.2	128393	2673.5
F6	16	65777.9	12373.2	30043.5	132621	8386.76
F7	16	33416.4	6103.78	26248.7	131457	3669.63
F8	16	32707.8	5428.12	24020.5	123335	2310.81
F9	16	34771.5	6162.71	24077.9	128524	3688.18
F10	16	34891.4	5916.36	23076.6	128234	4156.55
F11	16	30492.9	5031.46	21141.4	126807	2599.82
F12	16	53891.7	9446.11	22928.8	136040	5405.13
G1	16	45595.5	7310.62	21973	146059	3910.25
G2	16	49477.8	7868.45	20833.6	124703	2897.87
G3	16	45713.4	7683.95	25220	143098	2880.8
G4	16	31192.9	5034.21	22521.1	124743	2473.98
G5	16	29551	4918.21	23919.8	129189	2791.74
G6	16	30650.4	5258.28	23979.2	125998	2498.54
G7	16	31780.2	6001.34	23566.4	123706	2787.63
G8	16	37192.8	7227.56	24412	127769	3473.8
G9	16	39075.9	6527.71	24888.5	137168	2805.85
G10	16	38765.3	7585.21	23635.3	129143	2850.75
G11	16	82509.2	14018.4	27491.3	143941	8198.53
G12	16	42880.7	7016.57	23723.1	158167	2850.56
H1	16	58342.6	9978.95	22350.3	146543	6641.62
H2	16	44930.8	7355.08	20433.8	129048	3689.95
H3	16	42052.3	7836.11	24783.9	144886	4744.58
H4	16	39646	7291.54	23721.7	132164	2722.57
H5	16	38189.5	6723.51	25016.4	138931	2682.09
H6	16	47372	8547.32	26886.6	142467	4162.6
H7	16	38066.6	9984.33	27192.6	138122	2497.95
H8	16	40327.1	7085.14	22943.6	126323	2685.55
H9	16	40004.6	6980.24	23588.5	135426	2808.71
H10	16	35029	8644.59	5590.76	6928.62	3878.32
H11	16	38710.1	6460.86	4038.82	5846.92	3234.87
H12	16	43714.8	5921.96	3632.11	5651.64	3385.9
A1	17	19440.8	3884.91	13268.4	96087.2	2444.92
A2	17	31366.9	4752.85	17319.1	113080	2689.05
A3	17	30312.8	4783.32	19076.3	118761	2230.57
A4	17	34569.2	5346.77	17636.4	99281.5	2886.56
A5	17	35176.1	5637.21	20196.2	111387	3457.53
A6	17	52244.2	9100.32	25650.3	131119	5222.78
A7	17	37726	6419	21575.4	117427	3719.56
A8	17	188449	30101.3	72507.8	373052	15325.3
A9	17	47474.8	7371.58	22929.1	129532	3281.28
A10	17	32556.3	5675.56	20362.7	123752	3002.77
A11	17	31420.7	5031.14	20824.2	140706	2644.78
A12	17	35476.1	5459.4	17991.5	128826	3278.83
B1	17	34320.6	5904.12	19295.4	129847	3921.38
B2	17	38438.1	6139.7	19444.4	117296	3240.93
B3	17	31054.9	5105.65	20886.4	119321	2679.71
B4	17	29786	4570.36	20693.8	115851	2721.86
B5	17	33264.4	5235.33	24520.9	136341	3638.29
B6	17	26339.2	4190.02	22154.1	119613	1796.06
B7	17	31435	5091.04	23164.4	123814	2419.72
B8	17	111951	16148.4	66645.3	367178	8762.84
B9	17	38759.1	6607.94	22429.5	121807	2897.54
B10	17	38408.9	6142.1	20863.5	119566	2428.73
B11	17	41500.5	6382.01	22541.9	139954	2813.98
B12	17	43304.9	7416.98	21359.7	139040	4610.37
C1	17	39837.4	6849.28	21266.2	135227	3883.65
C2	17	40264.2	5747.05	25798.5	160832	3990.94
C3	17	34833.4	4703.28	22752.6	130669	2397.33
C4	17	30206.6	4613.33	21487.7	115189	3010.4
C5	17	31130	4870.79	23910.1	122920	2717.26
C6	17	32448.5	5457.29	25482.5	128657	2740.69
C7	17	34135.6	5743.49	26071.3	132849	2310.31
C8	17	35429.4	5610.5	22600.6	115520	2777.33
C9	17	38588.4	8019.93	23284.4	117152	3112.6
C10	17	32009.8	6071.7	22285.2	123834	2564.79
C11	17	33633.3	6073.32	22212.1	133902	1910.65
C12	17	43177.7	6878.38	21264.8	137567	2568.85
D1	17	44016.1	6939.47	21701.8	134282	3312.38
D2	17	31703.1	4975.27	19858.8	115377	2626.27
D3	17	39548.1	6584.13	25310.8	133567	3868.92
D4	17	31611	5504.39	22833.6	117515	4462.27
D5	17	37958.6	6153.72	25189.1	123572	2807.04
D6	17	42511.4	7534.32	26976.8	127593	4449.02
D7	17	30379.7	5394.87	24833.5	123057	2468.1
D8	17	31898.1	7196.16	26039.5	128008	2425.98
D9	17	42439.3	8265.77	23846.3	120879	4459.2
D10	17	38628.8	7342.83	24240.8	126406	3529.8
D11	17	39860.2	7919.16	23592.3	131195	2919.17
D12	17	139379	18418.5	28724.4	149046	7006.6
E1	17	46313.3	7071.99	22277.6	138722	4138.8
E2	17	40042	6688.05	20038.3	112515	3549.06
E3	17	69206.7	7910.67	25520.3	136679	5061.5
E4	17	33379.4	5835.96	24341.9	127599	3109.16
E5	17	32572.3	5793.32	25316.9	126215	3508.34
E6	17	33595.4	5621.49	25733.7	125996	3501.91
E7	17	43177.7	7493.7	26801.2	127475	4915.22
E8	17	36648.2	6841.62	25541	125810	3669.89
E9	17	38661.1	8934.71	28913.2	127678	2793.99
E10	17	34837.6	6403.76	22624.3	121959	3156.48
E11	17	63607.1	11616.6	25151.8	127396	5908.94
E12	17	60408.1	10293.6	23815.2	138433	5658.12
F1	17	46974.6	8526.19	24362.4	151752	7416.63
F2	17	42341.3	6689.15	20346.7	118514	3006.52
F3	17	35975.5	5910.97	23947	138347	2854.31
F4	17	40375.1	6715.06	24088.8	127265	3282.06
F5	17	30133.5	5184.06	24846.8	128552	2565.81
F6	17	65640.1	12234.1	30248.4	132573	8178.71
F7	17	33696.9	5881.64	26251.1	131697	3483.3
F8	17	32573.4	5598.66	23920.3	123584	2539.25
F9	17	34819	6012.24	24068.8	128747	3782.62
F10	17	34522.5	6025.15	23014.1	128347	4049.97
F11	17	30160.9	4772.89	20918.7	126356	2453.56
F12	17	54192.2	9606.54	23112.2	136091	5444.85
G1	17	48570.8	7889.77	21871.8	146642	3386.99
G2	17	51889.9	8194.92	20911	125035	3018.21
G3	17	48808.2	8090.18	25139.5	142956	2887.89
G4	17	31254.8	5146.37	22562	124098	2367.8
G5	17	29580.5	4893.44	24011.7	129534	2490.4
G6	17	30466.6	5256.12	24054.7	126262	2525.34
G7	17	31654.9	5803.78	23550.3	123809	3101.37
G8	17	37212.7	7076.88	24427.8	127238	3505.17
G9	17	39140.3	6698.25	24964.2	137532	2876.8
G10	17	38170.1	7568.19	23639.8	129396	2912.11
G11	17	81916	13586	27366.1	143604	8315.12
G12	17	43144.2	6737.51	23455.5	157802	3061.58
H1	17	61261.3	10261.9	22314.1	145856	7016.71
H2	17	46655.9	7488.9	20491.1	129183	3487.07
H3	17	44430.7	8127.83	24542.7	144519	4578.79
H4	17	42781	7615.62	23773.6	131944	2766.42
H5	17	40954.2	7026.59	24989.8	138968	2661.08
H6	17	50504.3	8884.95	26902.4	142722	4160.31
H7	17	40511.5	10149.5	27099.2	137795	2574.94
H8	17	42886.9	7298.4	22915.9	126487	2874.21
H9	17	42671.9	7300.07	23648.9	135610	3000.33
H10	17	35141.8	8466.27	5576.1	7020.75	3751.83
H11	17	38781.3	6489.6	4264.29	6016.97	3460.46
H12	17	44298.2	6169.2	3549.29	5474.58	3305.42
A1	18	19230.3	3833	13408.3	96018.8	2751.98
A2	18	31476.1	4467.84	17222.6	113005	2967.23
A3	18	30641.9	5074.64	18858.8	118399	2325.6
A4	18	34441.2	5148.57	17662.6	98981.4	2852.77
A5	18	35155.8	5569.27	20305	110912	3321
A6	18	52414.9	9335.85	25737.4	130511	5559.67
A7	18	37697	6288.08	21800.6	117494	3450.3
A8	18	188014	29022.7	72012.4	371130	14880.9
A9	18	47222.6	7497.68	22997.3	129439	3304.03
A10	18	32092.1	5853.91	20302.2	123162	3402.85
A11	18	31442.1	5152.07	20845	140388	2605.29
A12	18	35023.8	5212.39	17663.3	128308	3156.55
B1	18	34717.7	5333.84	19386.4	129767	3263.31
B2	18	38954.7	6211.07	19479.8	117135	3617.54
B3	18	30599.1	4991.94	20548.1	119497	2433.1
B4	18	30008.4	4615.68	20745.4	115395	2800.58
B5	18	33344.8	5224.56	24331.3	136167	3777.06
B6	18	26621	4049.08	22186	119631	2142.4
B7	18	30825.7	5095.41	23012.3	124183	2418.83
B8	18	111424	16159.2	66662.2	367781	8271.1
B9	18	38393.3	6542.21	22400.5	121761	2367.96
B10	18	38313.8	5837.91	20911.1	119167	2158.21
B11	18	41056.6	6445.05	22389.1	139940	3469.84
B12	18	43429.9	7599.85	21151.1	138009	4672.21
C1	18	39401.7	6492.22	21101.5	134993	3745.71
C2	18	40464.9	6259.29	26138.7	160554	4132.14
C3	18	35733.6	4524.03	22895.4	130831	2729.2
C4	18	30112.4	4864.42	21462.2	114596	3014.72
C5	18	30994	4969.61	24105.2	123210	2920.88
C6	18	32486.2	5395.82	25480.8	128155	2890.17
C7	18	34109.3	5572.79	26037.9	132589	2110.78
C8	18	35366.3	5512.68	22706.8	115328	2771.03
C9	18	38544.3	7985.14	23327.8	117665	2948.78
C10	18	31686.5	6199.91	22293.2	123460	2470.32
C11	18	33416.5	5810.97	21987.6	133621	2560.05
C12	18	43109.7	6712.09	21079.3	136945	3075.03
D1	18	44256.7	7179.71	21762.8	134414	3273.91
D2	18	31970.9	5057.06	19851	115458	2459.94
D3	18	39966.9	6837	25097.2	133071	3745.68
D4	18	31808.2	5562.68	22976.7	117426	3742.17
D5	18	37749.4	6334.19	24924.3	123089	2935.86
D6	18	42453	7377.08	27007.9	127140	4443.56
D7	18	30455.2	5415.6	24776.9	123156	2270.4
D8	18	31957	7064.39	26044.2	128635	2540.66
D9	18	42099.3	8221.57	23955.8	120396	4090.95
D10	18	38813.3	7187.16	24319.4	126095	3553.02
D11	18	39998.8	7892.2	23685	130872	3196.49
D12	18	138226	18195.2	28555.1	148326	7078.15
E1	18	46616	6888.21	22162	138626	4169.22
E2	18	39857.9	6681.55	20009.9	112634	3157.96
E3	18	69299.4	7851.18	25461.6	136464	4783.92
E4	18	33444.7	5832.41	24407	127680	2967.37
E5	18	32467	5654.43	25124.2	125697	3491.32
E6	18	33790.6	5850.32	25661.8	126351	3538.58
E7	18	43166.4	7567.82	26656.1	126964	5312.84
E8	18	36935.1	6781.15	25593.8	125782	4079.68
E9	18	38554.6	8854.54	29000.2	127802	3107.24
E10	18	35050.7	6298.93	22561.1	121768	3251.96
E11	18	62544.7	11524.1	25018.8	126630	6120.18
E12	18	59961.6	10303.6	23723.3	137855	5456.67
F1	18	49289.8	8670.56	24348	151098	7433.22
F2	18	45007.8	7136.91	20301.2	118197	3157.76
F3	18	38497.7	6255.41	24060.3	138218	3011.98
F4	18	40440.9	6591.9	24030.9	127233	3035.07
F5	18	30304.1	4831.81	24773.6	128388	2492.89
F6	18	65677.5	12156.3	30074.7	132447	8350.09
F7	18	33274	5999.33	26102.7	131290	3499.79
F8	18	32634.3	5444.55	23952.6	123462	2283.59
F9	18	34929	6262.48	24053.1	128281	3745.18
F10	18	34589.6	6079.55	22949.8	127894	3994.94
F11	18	30308.8	4690.39	20964.2	126285	2305.32
F12	18	53879.8	9444.39	23056.5	135743	5661.65
G1	18	54300.5	8422.43	21895.2	146169	3591.91
G2	18	56896.6	8801.74	20981.7	124991	2702.06
G3	18	54556.4	8786.33	25039.6	142425	3017.18
G4	18	31077.8	5210.92	22406.4	123994	2466.63
G5	18	29628.5	5081.59	24059.9	128941	2869.84
G6	18	30547.9	5543.49	23930.1	125893	2525.34
G7	18	31733.5	5787.2	23620	123872	2826.06
G8	18	37048.4	7128.47	24486.9	127421	3759.54
G9	18	38988.6	6668.25	24928.1	137190	2737.52
G10	18	38229.8	7285.2	23430.1	129211	2700.57
G11	18	81366.8	13752.7	27226.7	143207	8217.05
G12	18	42803.1	6883.11	23715.1	157601	3387.82
H1	18	65022.4	11004.1	22232.1	145573	6908.22
H2	18	50596	8252.32	20530.9	128952	3694.56
H3	18	48118.1	8569.76	24607.3	144675	4795.35
H4	18	47791.4	8284.41	23771.2	131841	2782.66
H5	18	46284.3	7530.97	24989.8	138749	3024.39
H6	18	55245.6	9434.44	26903.9	142150	4099.13
H7	18	45378.1	10874.6	27082.9	137629	2403.49
H8	18	47343.7	7859.86	22896.4	126243	2724.14
H9	18	47521.5	7836.34	23604.9	135312	2631.96
H10	18	34873.5	8476.35	5661.11	7055.79	3711
H11	18	38581	6473.51	4315.73	6104.8	3583.4
H12	18	44508.1	5799.08	3572.37	5124.72	3157.17
A1	19	19299.9	3503.12	13343.9	96149.3	2365.63
A2	19	31528.8	4338.29	17185.8	112654	2637.85
A3	19	30404	4604.27	18879.3	118557	2238.07
A4	19	34429.6	5294.91	17662.6	98821.1	3076.6
A5	19	34873.9	5541.48	20009.7	110987	3451.64
A6	19	51653.2	9357.73	25827.6	130150	5291.83
A7	19	37687.4	6354.5	21753.6	117184	3375.66
A8	19	188094	29489.4	71811.3	370635	15316.2
A9	19	47078.7	7244.47	22985.1	128940	3239.75
A10	19	32117	5739.17	20109.7	122979	3126.55
A11	19	31553.8	5125.73	20669.2	140452	2798.1
A12	19	34699.1	5408.81	17617.4	128067	3472.21
B1	19	34954.7	5854.27	19366.4	129454	3244.7
B2	19	38982.6	5996.95	19435.9	117126	3128.86
B3	19	30700.4	4994.49	20556.9	119349	2284.42
B4	19	29519.2	4770.89	20748.9	115745	3000.08
B5	19	32772.4	4991.83	24392.6	136363	3623.81
B6	19	26099	3993.98	22143.8	119627	1797.88
B7	19	31077.4	5459.05	23177.1	124014	2492.5
B8	19	111454	16272.5	66473.6	367827	8454.36
B9	19	38241	6488.34	22425.8	121692	2586.24
B10	19	38417.5	5838.9	20695.6	118841	2548.19
B11	19	40997.7	6449.72	22294.9	139978	3151.15
B12	19	43395.8	7592.65	21214.6	137715	4544.3
C1	19	39783.6	6899.59	21182.2	135061	3817.48
C2	19	40262.5	6344.39	26010	161092	3875.27
C3	19	35632.8	4861.72	22761.9	130469	2393.96
C4	19	30212.9	4491.56	21478.8	114965	2844.11
C5	19	31109.7	5029.89	23859.5	123252	3077.36
C6	19	32495.8	5287.83	25400.5	128170	2969.66
C7	19	36390.6	5793.51	26115.6	132775	2027.5
C8	19	35575.2	5531.72	22595.2	114829	2708.12
C9	19	38453.4	7910.35	23204.8	117232	3118.9
C10	19	31844.7	6073.66	22242.2	123252	2403.69
C11	19	33341.5	5962.92	22081.3	133511	2087.35
C12	19	42759.2	6847.49	20991.7	137250	2713.47
D1	19	44965.2	7341.97	21680.9	134377	3401.82
D2	19	32243.5	5091.62	19730	115489	2409.6
D3	19	40516.7	7023.5	25017.9	133339	3764.64
D4	19	31614.8	5516.66	22925.8	117685	4187.34
D5	19	37846.9	6354.03	24992	123460	2932.86
D6	19	42348.9	7513.58	26911.9	127428	4713.77
D7	19	30626.2	5251.54	24740.4	123395	2577.43
D8	19	31887.3	7551.68	26248.2	128298	2695.43
D9	19	41967.6	8179.14	24006.9	120364	4063.21
D10	19	38830.9	7361.59	24329	126325	3833.62
D11	19	39791.4	7922.27	23710.8	130784	2775.29
D12	19	137855	18216.6	28362.1	148628	7049.33
E1	19	47179.3	6895.11	22115.1	138915	4188.1
E2	19	40178.4	6807.21	20080.5	112270	3389.49
E3	19	69628.5	7947.85	25547.4	136737	4748.16
E4	19	33360.6	5829.74	24196.1	127914	2955.16
E5	19	32903.9	5549.17	25199.8	125916	3274.77
E6	19	33618.9	5499.73	25744.6	126248	3103.13
E7	19	43070.7	7816.06	26843.6	127184	4813.93
E8	19	36644	6726.1	25691.8	126025	3797.53
E9	19	38962.8	8960.25	28909.5	127340	3061.42
E10	19	35166	6342.46	22564.7	121748	3104.14
E11	19	62573.1	11588.6	24998.7	126810	6194.73
E12	19	59668.6	10071.2	23765.6	137642	5750.15
F1	19	54348.9	9338.07	24286.5	151421	7495.74
F2	19	49292.8	7753.5	20240.6	118192	3065.79
F3	19	43695.9	6737.63	23931.9	138398	3034.51
F4	19	40484.5	6522.37	24031.7	127298	3022.9
F5	19	30325.2	4910.36	24976.5	128410	2186.79
F6	19	65560.5	12444.2	30032.6	132287	8114.94
F7	19	33499.8	5756.15	26100.3	131557	3641.6
F8	19	33118.3	5435.16	23896.9	123285	2290.19
F9	19	35107.5	5903.61	23999.3	128631	3591.19
F10	19	34623.1	5963.96	23069.7	127875	4009.79
F11	19	30426.7	4824.2	20942.4	126202	2337.15
F12	19	53877	9519.89	22996.7	135918	5299.21
G1	19	65046.6	10083.8	21871.8	146156	3563.56
G2	19	65959.6	10099.3	20801.6	125009	3156.05
G3	19	66248.8	10487.6	24932.7	142208	2939.25
G4	19	31123.2	5005.16	22428	124057	2531.97
G5	19	29714.8	4860.14	23906.6	129083	2587.43
G6	19	30424	5269.81	23843.6	126038	2549.17
G7	19	31906.9	5837.72	23469.1	123600	2840.96
G8	19	37049.2	7034.3	24378.7	127582	3879.94
G9	19	39131	6831.94	24955.6	137842	3076.53
G10	19	38056.8	7311.17	23445.4	128975	2858.99
G11	19	81395.8	13622	27186.4	143091	8270.44
G12	19	43098.7	6972.89	23588.7	157568	3131.17
H1	19	73822.8	12180.5	22229	145480	6880.32
H2	19	59053.5	9197.99	20521.5	128390	3484.76
H3	19	55960.8	9785.62	24564.2	144266	4593.3
H4	19	57378.7	9419.95	23776.8	131671	2802.14
H5	19	56309.4	8855.61	24898.7	138565	2718.88
H6	19	64877.9	10680.5	26856.6	142036	4155.72
H7	19	54877	11956.8	26956.1	137482	2705.12
H8	19	56410.9	9005.88	22795	126400	2581.21
H9	19	56806.7	9103.4	23565.2	135894	2755.33
H10	19	34878.6	8599.25	5735.37	6931.62	3751.83
H11	19	38921.2	6939.11	4164.69	6082.28	3607.09
H12	19	45023.7	5614.02	3801.84	5655.88	3617.47
A1	20	19290.5	3339.01	13354.9	95753.2	2344.01
A2	20	31860.1	4482.42	17084.7	111796	2420.56
A3	20	30799.9	5138.59	18846.5	118408	2756.96
A4	20	34576.8	5305.28	17486.9	98823.4	2752.47
A5	20	35129.9	5472.5	20295.6	110714	3505.66
A6	20	52001	9269.15	25756.7	130329	5497.94
A7	20	38030.1	6430.55	21700.7	117628	3550.44
A8	20	187702	29520.7	72018.2	370820	14629.6
A9	20	47531.2	7300.4	22902.6	129191	3402.92
A10	20	32363.5	5966.38	20207.1	123019	3211.65
A11	20	31390.6	4865.91	20649.5	140452	2705.18
A12	20	34620.7	5148.41	17667.5	128034	3223.38
B1	20	34858.1	5471.43	19131.6	129344	3643.94
B2	20	39177.8	6263.12	19403.4	117216	3200.54
B3	20	31606.5	4846.28	20509	118668	2482.66
B4	20	29757.9	4679.12	20787.9	115878	2886.85
B5	20	32971.7	5183.61	24140.6	136259	4083.57
B6	20	26358.6	3996.69	22113.8	119703	1995.52
B7	20	31282.9	5270.24	23297.6	124063	2399.3
B8	20	111830	16164.6	66850.8	368049	8631.51
B9	20	38672.9	6494.73	22310.7	121616	2638.74
B10	20	38364	6144.08	20688.7	118627	2399.11
B11	20	41411	6143.87	22489.1	140056	3450.21
B12	20	43191.3	7588.33	21275.4	137592	4566.79
C1	20	40329.5	6807.56	21115.3	134938	3786.08
C2	20	41025.9	6126.55	25944	161362	3914.39
C3	20	35875	4539.07	22627.3	130122	2372.58
C4	20	30107.1	4716.79	21481	115146	2735.06
C5	20	31175.3	4738.38	24079.4	123264	2695.2
C6	20	32095.7	5143.3	25457.2	127935	2730.33
C7	20	36315	5731.58	26098.9	132859	1910.42
C8	20	35701.5	5381.09	22651.4	115130	2563.41
C9	20	38240.3	7842.52	23166.8	116922	2877.67
C10	20	31996.9	6016.89	22279.2	123123	2406.67
C11	20	33402.8	5850.32	22132.5	133544	1890.77
C12	20	41920.9	6854.62	21115	136921	2987.31
D1	20	46252	7862.49	21658.9	134534	3120.02
D2	20	33432.1	5402.65	19698.7	115170	2429.3
D3	20	41454.7	6871.77	24962.9	132954	3807.82
D4	20	32147.9	5405.18	22908.8	117078	3973.75
D5	20	37955.1	6172.62	24992	123298	2870.95
D6	20	42460.2	7304.51	26943.9	127258	4419.9
D7	20	30620.6	5469.13	24683.7	123470	2082.72
D8	20	32178	7340.31	26115	129039	2389.62
D9	20	42017.1	7961.66	23779.5	120131	3923.56
D10	20	38765.1	7071.81	24394.1	125943	3884.91
D11	20	39562.8	7839.32	23586.1	130941	3046.36
D12	20	136479	17898.8	28460.5	148767	6851.58
E1	20	47814.6	7135.17	22228.5	139003	4069.58
E2	20	41159.2	6795.29	19984.6	112134	3664.82
E3	20	70335.6	7940.41	25596.8	136594	4778.27
E4	20	33375.3	5768.36	24492.3	127970	2654.67
E5	20	32571.5	5642.05	25151.9	126018	3583.99
E6	20	33731	5899.54	25780.1	126486	3266.31
E7	20	43166.4	7519.6	26723	127114	4743.87
E8	20	36899.4	6939.99	25578.7	125821	3725.56
E9	20	38912.1	8903.87	28760.8	127345	3055.81
E10	20	34847.2	6576.11	22488.8	121400	3057.32
E11	20	62159.3	11341	24930.8	126535	6005.48
E12	20	59470.4	10131.4	23694	137929	5290.03
F1	20	63038	10404.4	24264.3	150978	7743.25
F2	20	56722.9	8461.31	20340.6	117994	2955.42
F3	20	53065	7791.53	23920.4	138337	2817.37
F4	20	40451.2	6680.71	24199.6	127629	2918.54
F5	20	30249.7	4989.72	24901.7	128193	2197.82
F6	20	65391.4	12241.7	30002.3	132133	8468.07
F7	20	33161.1	5794.34	25958.4	131226	3479.18
F8	20	32957.5	5649.5	23925.2	123276	2635.74
F9	20	35270.2	5945.46	24054.8	128845	3912.79
F10	20	34564.4	5932.51	22868.4	127834	3858.66
F11	20	30496	4802.07	20830.6	126064	2658.52
F12	20	53643.4	9373.18	22994.3	135459	5682.34
G1	20	84051.8	12893.6	21652.6	145451	3591.91
G2	20	81907.3	12035.7	21048	125298	3187.77
G3	20	86042.7	12677.8	24933.5	142021	3098.66
G4	20	31275.1	5293.22	22387.9	123884	2488.69
G5	20	29579.1	5153.59	23972	129190	2490.4
G6	20	30773	5439.78	23853.8	126014	2258.07
G7	20	32097.3	5965.9	23535	123695	2748.41
G8	20	37162.8	7317.64	24372	127559	3886.72
G9	20	39636.1	6677.68	24825.7	137374	2637.65
G10	20	38117.4	7561.03	23339.7	129093	2647.45
G11	20	80888.3	13664.8	27053.5	143002	8147.31
G12	20	42978.3	6919.51	23465.7	158097	3248.66
H1	20	87943.9	14246.7	22150.2	144694	6410.68
H2	20	72013.6	10988.7	20539.1	128684	3407.53
H3	20	69313	11468.4	24421.5	144157	4405.75
H4	20	74052.9	11629.2	23661.9	131990	2839.49
H5	20	73352.6	10772.8	24886.2	138748	2733.14
H6	20	81278.6	12680.4	26717.8	141828	4150.37
H7	20	71071.1	13879.7	26975.6	137390	2497.95
H8	20	72171.4	10838.5	22869.3	126213	2601.22
H9	20	72190.6	11117	23698	135403	2644.21
H10	20	35201.7	8594.21	5582.94	6937.63	3895.25
H11	20	38934.5	6654	4199.71	6245.57	3259.69
H12	20	44803.9	5827.21	3564.23	5910.85	3192.46
A1	21	20303.2	3843.05	13224.4	95962.9	2721.7
A2	21	32387.2	5128.54	17101.5	112004	2545.12
A3	21	32181.3	5030.59	18794.5	118450	2476.88
A4	21	34430.9	5438.95	17578.2	98490.5	2999.53
A5	21	35149	5746.33	20128.8	110604	3334.75
A6	21	51735.7	9051.33	25622.4	130137	5303.34
A7	21	38277.5	6081.1	21733	117498	3345.43
A8	21	187746	29085.3	72044.4	370156	15055.6
A9	21	47900.8	7405.14	22791.7	128630	3485.99
A10	21	32262.6	5883.45	20139.9	122456	3180.71
A11	21	31469.3	5148.48	20519.9	140187	2470.55
A12	21	34547.7	5115.68	17478.3	127716	3101.1
B1	21	35817	5521.28	19189.8	129187	3258.23
B2	21	39763.3	6567.95	19544.9	116754	3410.34
B3	21	32167.7	5057.1	20464.8	118992	2482.66
B4	21	29832.8	4700.65	20690.4	115262	2675.49
B5	21	32694.3	5416.34	24214.8	136243	3670.87
B6	21	26373.4	4031.02	22152.2	119566	2043.58
B7	21	31541	5446.82	23217	124134	2695.77
B8	21	112767	15940.7	66563.7	368906	8188.63
B9	21	38819.5	6466.43	22289.2	121338	2664.53
B10	21	38053.9	5903.09	20696.6	118290	2289.52
B11	21	41335.5	6297.96	22478.7	139668	3303.57
B12	21	43188.1	7693.44	21181.5	136889	4849.32
C1	21	40600	6942.54	21143	134751	4236.91
C2	21	41182	6237.17	26104.8	161018	3938.21
C3	21	36396.4	4714.85	22613.3	130279	2372.58
C4	21	29971.8	4682.3	21538.6	115256	3171.28
C5	21	31222.5	5179.11	23829.5	123313	3118.48
C6	21	32351.5	5231.35	25467.7	128043	2653.43
C7	21	36685.4	5694.27	26263.4	133060	2040.69
C8	21	35691.2	5362.91	22726.7	115152	2511.28
C9	21	38681	7834.69	23239.2	117143	3069.4
C10	21	31969.2	6165.65	22002.4	122462	2564.79
C11	21	33284.8	5994.62	22003.9	133368	1975.81
C12	21	42718.1	6659.83	21144.9	136952	2841.5
D1	21	48948.2	7936.24	21720.8	134394	3224.85
D2	21	35228.5	5512.08	19661.7	115182	2388.81
D3	21	43849	7462.86	25026.3	132851	3881.56
D4	21	31979.5	5471.66	22779.5	117323	3944.14
D5	21	37853.1	6372.93	24990	123458	2960.83
D6	21	42127.2	7510.13	26971.3	127573	4528.17
D7	21	30678.4	5345.66	24775.1	123631	2318.69
D8	21	32943	7350.04	26113.1	129142	2699.16
D9	21	42384.2	8232.18	23802.7	120328	3926.43
D10	21	38863.4	7144.96	24087.5	125970	3098.25
D11	21	39280.2	7843.47	23636.6	130518	3278.85
D12	21	135767	17829.5	28364	148218	7250.06
E1	21	49870.7	7715.21	22042	138692	4214.32
E2	21	42729.1	7219.93	20118.5	112141	3561.57
E3	21	72007.6	8080.76	25608.9	136577	4569.37
E4	21	33588.2	5888.44	24386.8	128136	2747.63
E5	21	32683.4	5671.24	25259.7	125771	3498.88
E6	21	33923	5751.02	25735.5	126703	3813.6
E7	21	43464.9	7524.06	26702.3	126820	5066.7
E8	21	37314.4	6899.38	25571.2	126240	3830.16
E9	21	39084.2	8797.29	28982.1	127078	3190.46
E10	21	34752.9	6551.24	22555.7	121311	3324.49
E11	21	61878.5	11362.2	24900.2	126112	6259.73
E12	21	59191.1	9908.23	23760.7	137594	5691.28
F1	21	80885.2	12887.2	24259.1	151019	7577.39
F2	21	71487.9	10189.4	20210.3	117606	2854.25
F3	21	70472.1	9901.12	24017.8	138269	2934.5
F4	21	40065.1	6665.63	24157	127644	3178.57
F5	21	30564.5	4916.84	24789.4	128208	2470.85
F6	21	65368.6	12398.9	30040.4	132103	8345.31
F7	21	33648	5721.08	25952.8	131696	3429.71
F8	21	33501	5772.32	23926.8	123183	2344.62
F9	21	35640.8	6191.67	24054.8	128673	3845.58
F10	21	34367.4	5888.31	23022.6	127559	4245.66
F11	21	30266.4	4893.62	20783.1	125870	2538.14
F12	21	53783.6	9420.37	23064.7	134890	5372.03
G1	21	117448	17669.2	21869.2	145393	3925.72
[truncated: 10,391 more rows]

## Sheet: Multicomponent Data
Block Type	96alum
Chemistry	SYBR_GREEN
Experiment File Name	D:\ShuJu\LZM\spx 5-8 iaa lp.eds
Experiment Run End Time	2023-08-17 02:37:08 AM CST
Instrument Type	sds7500
Passive Reference	ROX
Well	Cycle	SYBR	ROX
A1	1	19609.1	102108
A2	1	32177.2	119827
A3	1	30937.5	124906
A4	1	35719	103812
A5	1	35343.8	116810
A6	1	52909.6	140186
A7	1	39657.5	124274
A8	1	198609	393970
A9	1	48145.8	135612
A10	1	32205.5	127784
A11	1	30926.3	142233
A12	1	35819.7	137328
B1	1	35677	136959
B2	1	39753.7	123375
B3	1	31553.8	129249
B4	1	30153.7	122242
B5	1	33722.1	144991
B6	1	26559.9	126708
B7	1	32065.2	130815
B8	1	116990	390800
B9	1	40233.3	131528
B10	1	39779.5	127793
B11	1	43269.7	149010
B12	1	45516.7	148941
C1	1	40237.7	142697
C2	1	41301.6	170917
C3	1	35608.2	139272
C4	1	30127.6	120098
C5	1	31892.8	130086
C6	1	32678.5	135156
C7	1	34567.3	140598
C8	1	36262.2	124001
C9	1	39873.5	126468
C10	1	33101.5	135016
C11	1	34302.2	143351
C12	1	45009.6	145709
D1	1	44152	140214
D2	1	32171	123904
D3	1	39861.7	141445
D4	1	31872	123320
D5	1	36795.3	131159
D6	1	42531.8	136688
D7	1	31401.6	131006
D8	1	31288	134814
D9	1	45212.3	129873
D10	1	40233.8	134059
D11	1	40643.9	138521
D12	1	153140	157577
E1	1	46118.1	145465
E2	1	41675.8	119041
E3	1	76552.7	144988
E4	1	33863.8	133406
E5	1	31362.6	132300
E6	1	34026.2	133674
E7	1	45726	135575
E8	1	38317.1	133506
E9	1	39977.5	136098
E10	1	36073.2	131064
E11	1	73313.5	135790
E12	1	62437.4	144856
F1	1	45204.2	159547
F2	1	41567.8	125078
F3	1	33685.5	145756
F4	1	40554.9	133492
F5	1	30323.8	136258
F6	1	63165	141969
F7	1	33359	140604
F8	1	33046.6	131369
F9	1	35395.5	135812
F10	1	35767.9	136908
F11	1	30646.3	134893
F12	1	54291.3	143666
G1	1	42487.8	154140
G2	1	49150.3	130497
G3	1	44405.7	154131
G4	1	31351.3	131325
G5	1	29609.4	137369
G6	1	30638.2	134953
G7	1	31977.3	131097
G8	1	37883.5	135815
G9	1	40756.6	145037
G10	1	39694	137817
G11	1	87660.3	152284
G12	1	43284.2	161658
H1	1	57281.8	155647
H2	1	43979.9	136323
H3	1	40721.3	153223
H4	1	36311	139471
H5	1	35413.2	145285
H6	1	45485.1	150865
H7	1	35096.1	147834
H8	1	37744.9	132165
H9	1	37877.1	140466
H10	1
H11	1
H12	1
A1	2	19727.8	101658
A2	2	32496.9	119267
A3	2	31367.7	124843
A4	2	36147.5	103969
A5	2	35662.5	116188
A6	2	53294.6	140279
A7	2	40026.2	123702
A8	2	198568	392005
A9	2	48334.7	135003
A10	2	32749.9	128862
A11	2	31577.3	142927
A12	2	36475.2	136722
B1	2	35370.9	137038
B2	2	39544.9	121958
B3	2	31182.8	126424
B4	2	30173.6	119341
B5	2	33885	142923
B6	2	26335.6	123892
B7	2	31960.7	127126
B8	2	116859	380182
B9	2	39806.9	128814
B10	2	39266.8	125904
B11	2	43213.9	145232
B12	2	46320.1	149028
C1	2	40860	142585
C2	2	41193.3	166495
C3	2	36059.9	136735
C4	2	30519.1	116503
C5	2	31806.8	126817
C6	2	32466.2	133412
C7	2	34487.3	136945
C8	2	36431.3	121875
C9	2	39565.6	124146
C10	2	33211.9	132259
C11	2	34406.6	139801
C12	2	45283.6	145044
D1	2	44695	140431
D2	2	31349.9	121028
D3	2	39763	139689
D4	2	31809.5	121409
D5	2	37010.7	128122
D6	2	42949.7	133129
D7	2	31230.3	127030
D8	2	31187.4	130465
D9	2	44865.3	127931
D10	2	39974.9	131947
D11	2	40808.3	136568
D12	2	152828	157178
E1	2	46550.8	144346
E2	2	40947.4	117599
E3	2	75726.5	141511
E4	2	33465.9	129718
E5	2	31477.5	130707
E6	2	34305.8	129957
E7	2	45489	133173
E8	2	38183.2	129810
E9	2	39704.3	134288
E10	2	35942.9	127965
E11	2	71326.2	132992
E12	2	63755.4	145139
F1	2	45297.2	158733
F2	2	41034.3	122740
F3	2	33445.5	142113
F4	2	40834.2	130031
F5	2	30359.9	133855
F6	2	64110.9	139269
F7	2	34206.7	136893
F8	2	32975.2	127712
F9	2	35044.6	132574
F10	2	35689.8	134830
F11	2	30651.2	133612
F12	2	54673.7	144429
G1	2	42932.5	153249
G2	2	48694.8	127286
G3	2	44189.9	151720
G4	2	31119.7	129064
G5	2	29485.7	133571
G6	2	30649.7	130921
G7	2	32091.7	127832
G8	2	37574.7	132436
G9	2	40553.1	141721
G10	2	39361.9	135520
G11	2	86912.5	150987
G12	2	43805.3	161518
H1	2	57096.1	154749
H2	2	44435.8	135976
H3	2	40419.2	153041
H4	2	37024.5	139084
H5	2	35386.1	144856
H6	2	45388.5	150742
H7	2	35577.1	147510
H8	2	38243	132204
H9	2	38065.7	139507
H10	2
H11	2
H12	2
A1	3	19795.3	101773
A2	3	32403.5	118828
A3	3	31748.5	123125
A4	3	35983.9	103192
A5	3	35759.2	116021
A6	3	53497.2	139404
A7	3	39943.4	123164
A8	3	197129	389651
A9	3	48174.1	134626
A10	3	32716.2	128292
A11	3	31831.7	142787
A12	3	36515.4	136880
B1	3	35462.6	136625
B2	3	39279	121590
B3	3	31071.5	124919
B4	3	30310.5	117799
B5	3	33693.8	141846
B6	3	26253	121537
B7	3	31874.1	126309
B8	3	114297	376707
B9	3	39924.3	127402
B10	3	39393.3	125463
B11	3	42986.6	143634
B12	3	45926.1	148139
C1	3	41233.7	141494
C2	3	41654.5	165559
C3	3	35552.8	136266
C4	3	30262.1	115658
C5	3	31724.6	125955
C6	3	32674.2	132753
C7	3	34840.2	135509
C8	3	36101.9	120220
C9	3	39674.1	122424
C10	3	33318.5	130455
C11	3	33946.1	138284
C12	3	45414.2	144784
D1	3	44935.6	139182
D2	3	31546.8	120132
D3	3	39340.6	139042
D4	3	31973.7	120843
D5	3	37399.3	126986
D6	3	43182.2	132051
D7	3	31306	125581
D8	3	31210.5	129691
D9	3	44377.5	126547
D10	3	39762.4	131552
D11	3	40607.5	135642
D12	3	153120	157078
E1	3	46416.3	143788
E2	3	41304.1	117044
E3	3	74862.6	140847
E4	3	33563.6	128491
E5	3	32087.9	129816
E6	3	34245.6	128532
E7	3	45447.4	131622
E8	3	37797.4	128551
E9	3	39811.7	133444
E10	3	35703.9	126442
E11	3	70491.7	131633
E12	3	63782.4	144388
F1	3	45568.3	157472
F2	3	40700.1	122594
F3	3	33631.1	141024
F4	3	40530.9	128975
F5	3	30270	132895
F6	3	64974.2	138202
F7	3	34617.7	135388
F8	3	32882.1	126328
F9	3	35101.4	131353
F10	3	35497.2	134008
F11	3	30609.4	132749
F12	3	55089.4	143441
G1	3	42979.1	153079
G2	3	48239.7	126635
G3	3	44302.1	150742
G4	3	31396	128135
G5	3	29446.3	132014
G6	3	30591.6	129580
G7	3	31944.2	126955
G8	3	37417.6	131025
G9	3	40658.7	140256
G10	3	39595.9	133858
G11	3	86432.3	150549
G12	3	44051	161556
H1	3	56496.1	154204
H2	3	43755.3	136047
H3	3	40594.9	152455
H4	3	37299.2	138640
H5	3	35511	144704
H6	3	45564.6	150339
H7	3	36117.5	146725
H8	3	38474.4	132170
H9	3	38119.5	139245
H10	3
H11	3
H12	3
A1	4	19832	101122
A2	4	32624.5	117989
A3	4	31055.9	121977
A4	4	35612.1	102986
A5	4	35675.4	115561
A6	4	53088.5	138151
A7	4	39930.8	122035
A8	4	197120	388423
A9	4	48511.2	134195
A10	4	33026	127422
A11	4	31812.7	143204
A12	4	35955.4	135842
B1	4	35509.8	135282
B2	4	39381.9	120980
B3	4	31187.1	123995
B4	4	30043.1	117569
B5	4	33678	140783
B6	4	26081.7	121414
B7	4	31625.6	125828
B8	4	115561	374298
B9	4	39778.6	126659
B10	4	39556	124660
B11	4	42605.5	143126
B12	4	46127.2	147048
C1	4	41154.1	140764
C2	4	40835	164695
C3	4	35416.4	135831
C4	4	30316	115810
C5	4	31389.1	125294
C6	4	32832.9	132113
C7	4	34808.1	135215
C8	4	35894.5	119347
C9	4	39415.7	122075
C10	4	33153.5	129915
C11	4	34008.4	137709
C12	4	45172.6	143596
D1	4	44634.6	138285
D2	4	31462.5	119877
D3	4	39441.4	138190
D4	4	31534.9	120284
D5	4	37378.1	126473
D6	4	43468.1	131448
D7	4	31001.6	124792
D8	4	31279.1	128888
D9	4	44218.2	126052
D10	4	39704.9	130497
D11	4	40132.6	134528
D12	4	152778	156356
E1	4	46481.1	143068
E2	4	41240	116396
E3	4	74455.7	140220
E4	4	33502.7	128315
E5	4	32297.6	129183
E6	4	34191.8	128167
E7	4	45366.5	130896
E8	4	37350.3	127822
E9	4	39721.1	132999
E10	4	35527.9	125825
E11	4	69812.4	130877
E12	4	63910.1	143718
F1	4	45571.5	156356
F2	4	40402.6	122237
F3	4	33530.4	140913
F4	4	40613.6	128880
F5	4	30433.8	132656
F6	4	65603.4	136868
F7	4	33387.9	134461
F8	4	33025.7	126094
F9	4	35170.4	131594
F10	4	35374.2	133163
F11	4	30676.2	131822
F12	4	54627.6	142669
G1	4	42860.2	152318
G2	4	48112.5	126512
G3	4	44007.9	149859
G4	4	30728.8	127722
G5	4	29340.5	132023
G6	4	30627	129208
G7	4	32097.3	126524
G8	4	37573.8	130666
G9	4	40443.6	140051
G10	4	38771	133380
G11	4	86058.3	149919
G12	4	44345.9	161336
H1	4	56803.1	154568
H2	4	43632.4	134970
H3	4	40348	152047
H4	4	36919.6	137780
H5	4	35350.6	144206
H6	4	45414.4	149629
H7	4	35947.5	145776
H8	4	38453.9	131414
H9	4	38339.8	138579
H10	4
H11	4
H12	4
A1	5	19956.9	100817
A2	5	32704.4	117662
A3	5	31064.2	121372
A4	5	35289.5	102504
A5	5	35368.9	115073
A6	5	52706.5	137297
A7	5	39412.7	121247
A8	5	196295	386497
A9	5	48144.9	133541
A10	5	32516.5	127371
A11	5	32008.4	142294
A12	5	36458.9	135428
B1	5	35778.7	133820
B2	5	39365.2	120451
B3	5	31197.5	123619
B4	5	30246.8	117091
B5	5	33410.8	140064
B6	5	26089.6	121220
B7	5	31341.2	125474
B8	5	113886	374319
B9	5	39512.6	126177
B10	5	39230.4	124393
B11	5	42846.8	142873
B12	5	45513.7	146128
C1	5	40604.1	139837
C2	5	41921.8	163936
C3	5	35798.7	134960
C4	5	30526.4	115835
C5	5	31617.2	125173
C6	5	32695.2	131425
C7	5	34899.9	134886
C8	5	35817.7	119002
C9	5	39537.7	121689
C10	5	32852.5	129385
C11	5	33973.8	137335
C12	5	45123.6	142666
D1	5	44708.8	138062
D2	5	31952.3	119154
D3	5	39777	137576
D4	5	32069	120257
D5	5	37515.7	126104
D6	5	43270.6	130850
D7	5	31149	124499
D8	5	31563.5	128850
D9	5	43795.8	125034
D10	5	39717.9	130293
D11	5	40507.7	134601
D12	5	151652	155189
E1	5	46259.1	142096
E2	5	40404	115811
E3	5	73486	139112
E4	5	33309	128477
E5	5	32130.9	129021
E6	5	34259.8	127478
E7	5	44604.2	130948
E8	5	37369.7	127393
E9	5	39530.3	132492
E10	5	35739.3	124760
E11	5	69401.8	130709
E12	5	63582.1	142770
F1	5	44921.7	155604
F2	5	40535.5	121711
F3	5	33728.2	140572
F4	5	40660.6	128428
F5	5	30497.8	132185
F6	5	65961.8	136612
F7	5	33928.7	134265
F8	5	32830.2	125742
F9	5	35004	131323
F10	5	35265.8	132964
F11	5	30608.6	130910
F12	5	54688.7	141789
G1	5	43202.8	150967
G2	5	47677.2	126090
G3	5	44222.8	148974
G4	5	31299	127306
G5	5	29396.3	131898
G6	5	30737.6	129036
G7	5	31728.1	126267
G8	5	37329.7	130221
G9	5	40379	139563
G10	5	39051.4	133252
G11	5	85349.6	149037
G12	5	44165	160346
H1	5	57033	153590
H2	5	43546.3	134207
H3	5	40287.3	151270
H4	5	37152.9	136713
H5	5	35289.4	143760
H6	5	45440.1	149113
H7	5	35913	144596
H8	5	38525.9	130666
H9	5	38333.6	138364
H10	5
H11	5
H12	5
A1	6	20061.3	100001
A2	6	31637.5	116690
A3	6	31174.3	121129
A4	6	35520.6	102330
A5	6	35207	114939
A6	6	52685.6	136391
A7	6	39553.3	120755
A8	6	194811	384045
A9	6	47627.7	133351
A10	6	32893.5	126898
A11	6	31913.5	142981
A12	6	36334.9	134874
B1	6	35444.8	133966
B2	6	39419	119844
B3	6	31002	123406
B4	6	30075.1	116860
B5	6	33144.5	140114
B6	6	25830.3	121092
B7	6	31537.4	125288
B8	6	114510	374099
B9	6	39584.2	125823
B10	6	39445	123562
B11	6	42511.7	142485
B12	6	45301	145390
C1	6	40579.4	139155
C2	6	41249.6	163817
C3	6	35210.6	134782
C4	6	30448.3	115850
C5	6	31468.8	124669
C6	6	32623.1	131372
C7	6	34756.7	134426
C8	6	35947.1	118516
C9	6	39261.8	121254
C10	6	32855.2	128944
C11	6	34098.5	136676
C12	6	45113.3	142407
D1	6	44241.7	137510
D2	6	31290	118548
D3	6	39676.6	137193
D4	6	31793.9	119619
D5	6	37655.4	126060
D6	6	43380.4	130619
D7	6	30881	124505
D8	6	31270.2	128688
D9	6	43664.6	124680
D10	6	39395.9	129982
D11	6	40345.8	134249
D12	6	151219	154710
E1	6	46694.6	141871
E2	6	40383	115774
E3	6	73095.8	139621
E4	6	33543.5	128038
E5	6	32212.2	128763
E6	6	34299.2	127356
E7	6	44725.7	130645
E8	6	37438	127352
E9	6	39536.9	131940
E10	6	35793.6	124866
E11	6	68886.5	130292
E12	6	63314.7	142583
F1	6	45346	154433
F2	6	39931.2	121620
F3	6	33456.4	140431
F4	6	40836.5	128529
F5	6	30358	131766
F6	6	65956.7	136383
F7	6	34283.9	134034
F8	6	33010.6	125429
F9	6	35072.1	130911
F10	6	35166.2	132475
F11	6	30822.6	130409
F12	6	54618.1	141120
G1	6	42723.6	150162
G2	6	47100.1	125944
G3	6	43761.5	148409
G4	6	31348.9	126871
G5	6	29384	131372
G6	6	30444.2	128787
G7	6	31880.2	125936
G8	6	37418.1	130222
G9	6	40182.3	139267
G10	6	39146.3	132835
G11	6	84790.5	148680
G12	6	44402.4	159834
H1	6	57117.7	152428
H2	6	43362.6	133760
H3	6	40142.1	150840
H4	6	37125	136350
H5	6	35602.5	143431
H6	6	45495.5	148555
H7	6	36070.3	143908
H8	6	38563.6	130149
H9	6	38312.3	137563
H10	6
H11	6
H12	6
A1	7	19504.4	99395
A2	7	32153.7	116401
A3	7	31043.7	120264
A4	7	35917	102182
A5	7	35661.7	114082
A6	7	52460.4	135332
A7	7	39399.8	119940
A8	7	194316	383034
A9	7	47737.6	132788
A10	7	33089.7	126590
A11	7	31903.8	142537
A12	7	35880.8	133548
B1	7	34645	133270
B2	7	39326.2	119865
B3	7	31108.6	122745
B4	7	30470.6	117149
B5	7	33298.2	140071
B6	7	26131.6	121218
B7	7	31642.5	125102
B8	7	112900	372769
B9	7	39613.4	125551
B10	7	39506	123060
B11	7	42327.9	142352
B12	7	45163.9	144839
C1	7	40522.1	138657
C2	7	41093.5	163126
C3	7	35274.6	134353
C4	7	30067.4	115744
C5	7	31530.7	124344
C6	7	32582	130838
C7	7	35062.8	134591
C8	7	35901.7	118084
C9	7	39190.8	120628
C10	7	32391.4	128139
C11	7	33909.8	136540
C12	7	44610.5	141324
D1	7	44278.9	137369
D2	7	31262.7	118866
D3	7	39449.3	136772
D4	7	31618.5	120116
D5	7	37528.3	125617
D6	7	43538.6	130447
D7	7	30921.9	124395
D8	7	31570.5	128807
D9	7	43631.1	124341
D10	7	39528.8	129650
D11	7	40268.1	134044
D12	7	148999	153971
E1	7	46290.4	141245
E2	7	40122.6	115419
E3	7	72261.8	138866
E4	7	33519.3	128215
E5	7	32407.6	128495
E6	7	34149	126966
E7	7	44660.3	130600
E8	7	37265.7	127317
E9	7	39343.2	131834
E10	7	35549.1	124670
E11	7	68091	129973
E12	7	62526.4	141872
F1	7	45068.1	154574
F2	7	39911.7	121028
F3	7	33582.5	139975
F4	7	40941.4	128493
F5	7	30504.8	131422
F6	7	66243.5	136048
F7	7	34393	134187
F8	7	32927.6	125230
F9	7	34766.3	130641
F10	7	35317.2	132007
F11	7	30568.6	129748
F12	7	54865.2	140263
G1	7	42741	149655
G2	7	47258.8	126160
G3	7	43803.3	147815
G4	7	31184.4	126752
G5	7	29339.9	131406
G6	7	30640	128461
G7	7	32084.7	125981
G8	7	37468.6	129895
G9	7	40014.1	139381
G10	7	38821.1	132610
G11	7	83950.4	147915
G12	7	44063.1	159556
H1	7	57093.6	151955
H2	7	43080.6	132858
H3	7	40240.6	149747
H4	7	37011.9	135770
H5	7	35442.1	142830
H6	7	45459.3	148010
H7	7	35981.7	143483
H8	7	38309.4	129476
H9	7	38020.1	136781
H10	7
H11	7
H12	7
A1	8	19372.1	98663.4
A2	8	31967.2	115459
A3	8	30628.1	120329
A4	8	35323	101608
A5	8	35400.5	113664
A6	8	52133.9	135071
A7	8	38764.8	119486
A8	8	193425	382671
A9	8	47536.1	132014
A10	8	33093.2	126167
A11	8	32122	141910
A12	8	35620.8	133512
B1	8	35110.1	132725
B2	8	39204.6	119487
B3	8	30525.6	122559
B4	8	29923.4	117037
B5	8	33286.3	139293
B6	8	26258.5	120815
B7	8	31567.3	124873
B8	8	112810	372129
B9	8	39503.3	124782
B10	8	39085.8	122374
B11	8	42327.7	141774
B12	8	45314.8	143882
C1	8	40780.6	138348
C2	8	41134.4	163729
C3	8	35569.1	134032
C4	8	30227	115805
C5	8	31749	124334
C6	8	32599	130732
C7	8	34994.8	134199
C8	8	35598.8	117991
C9	8	39212.9	120393
C10	8	32545.6	127827
C11	8	34184.8	135991
C12	8	44121.6	140618
D1	8	43790.7	136599
D2	8	31532	118117
D3	8	39363.2	137008
D4	8	31517.2	119375
D5	8	37534	125159
D6	8	43303.3	130242
D7	8	30911	124248
D8	8	31639	128636
D9	8	43174.7	123931
D10	8	39455.2	129205
D11	8	40060.3	133484
D12	8	148062	153152
E1	8	45876.5	141039
E2	8	40201.4	115134
E3	8	72017.5	138828
E4	8	33378.3	128346
E5	8	32420.8	128217
E6	8	34303.8	126906
E7	8	44311.4	130129
E8	8	37137.6	126674
E9	8	39010.7	131379
E10	8	35804.3	124474
E11	8	67430.2	129804
E12	8	62870.5	141800
F1	8	44676.4	153959
F2	8	39927	121066
F3	8	33326.7	139794
F4	8	40959.2	128270
F5	8	30341	130635
F6	8	66005.3	135917
F7	8	34387.2	133569
F8	8	33072	124971
F9	8	34905.5	130168
F10	8	35346	131566
F11	8	30606.8	129505
F12	8	54798.2	139893
G1	8	42716.7	149454
G2	8	46834.5	126075
G3	8	43342.4	147192
G4	8	31135.2	126435
G5	8	29660.3	131064
G6	8	30598	128064
G7	8	31878.7	125714
G8	8	37238.9	129603
G9	8	40052.8	138905
G10	8	38769.9	132425
G11	8	83184.7	147418
G12	8	43812.3	159241
H1	8	57238.2	151052
H2	8	43250.6	132483
H3	8	40090.2	149194
H4	8	36689.4	135194
H5	8	35763.7	142264
H6	8	45314.3	147215
H7	8	35763.7	142421
H8	8	38110.9	128798
H9	8	37946.9	136419
H10	8
H11	8
H12	8
A1	9	19854.8	98798.3
A2	9	31837.1	115733
A3	9	30487.8	120296
A4	9	35202	101410
A5	9	35559.5	113890
A6	9	51877.4	134599
A7	9	39037.9	119318
A8	9	193459	381227
A9	9	47355.3	132213
A10	9	33252.5	126067
A11	9	32434.9	141661
A12	9	36080.6	133012
B1	9	34599.3	132249
B2	9	39031.4	119645
B3	9	30494.3	122224
B4	9	29978.1	116819
B5	9	33133.1	139003
B6	9	26379.8	120696
B7	9	31489	125047
B8	9	113352	371603
B9	9	39275.1	125035
B10	9	39217	122761
B11	9	42280	141769
B12	9	44894.3	143537
C1	9	40335	137934
C2	9	41732.6	163502
C3	9	35333.3	133776
C4	9	30073.6	115483
C5	9	31373.1	124442
C6	9	32589.5	131050
C7	9	34560.1	133934
C8	9	35585.2	117719
C9	9	39437.7	120207
C10	9	32671.7	127403
C11	9	33960.7	136140
C12	9	43995	140756
D1	9	44201.5	136749
D2	9	31472.4	117807
D3	9	39290	136308
D4	9	31904.1	118979
D5	9	37573.9	125616
D6	9	43174.4	129830
D7	9	30826.8	124221
D8	9	31735	128705
D9	9	43361.4	124047
D10	9	39469.9	129560
D11	9	40553.1	133620
D12	9	146227	152868
E1	9	46198.8	140535
E2	9	40150.7	114510
E3	9	71330.4	138259
E4	9	33307.6	128565
E5	9	32710.3	128344
E6	9	33978.9	126840
E7	9	44212.4	129818
E8	9	37000.7	126759
E9	9	39344.3	131314
E10	9	35335.9	124217
E11	9	67337.3	129349
E12	9	62206.5	141288
F1	9	44999.4	154094
F2	9	39737.8	120504
F3	9	33391	139607
F4	9	41036.2	128412
F5	9	30603.2	130758
F6	9	66024.6	135742
F7	9	34398.7	133716
F8	9	32929.3	125145
F9	9	35005.2	130072
F10	9	35029.5	131423
F11	9	30726.4	129563
F12	9	54539.8	139266
G1	9	42931.6	148720
G2	9	46968.3	125372
G3	9	43671.1	147010
G4	9	31174.6	126551
G5	9	29932.3	131202
G6	9	30766.7	128241
G7	9	31960.1	125358
G8	9	37102.2	129594
G9	9	39987.3	139316
G10	9	38661.5	132274
G11	9	82806.8	147304
G12	9	43713.5	158631
H1	9	56541.9	150878
H2	9	42910.4	131770
H3	9	39883.4	148767
H4	9	37108.9	134879
H5	9	35489	142108
H6	9	45529.2	146903
H7	9	35950.2	141883
H8	9	38389.7	128873
H9	9	38077.9	136532
H10	9
H11	9
H12	9
A1	10	19526.2	98115.7
A2	10	31421.7	115200
A3	10	31096.8	120012
A4	10	35236.1	100820
A5	10	35648.7	113353
A6	10	52218.1	133821
A7	10	38622	119042
A8	10	192238	379748
A9	10	47579.6	131817
A10	10	32714.7	126033
A11	10	31813.9	142009
A12	10	35482.7	131887
B1	10	35238.5	132386
B2	10	38796.3	119407
B3	10	30893.3	121483
B4	10	30297.8	116729
B5	10	32998.8	138732
B6	10	26174.4	120703
B7	10	31486.3	125085
B8	10	112688	371716
B9	10	39156.6	124418
B10	10	39194.3	122183
B11	10	41860.6	141540
B12	10	44705.7	142514
C1	10	40293	137724
C2	10	41838.3	163630
C3	10	35488.6	133346
C4	10	30482	115703
C5	10	31452.4	124639
C6	10	32566.3	130307
C7	10	34664.9	133662
C8	10	35383.8	117329
C9	10	39323.1	120070
C10	10	32296.3	127094
C11	10	33644.9	136049
C12	10	43848.3	139889
D1	10	43983.1	136185
D2	10	31713.1	117780
D3	10	38993.1	135837
D4	10	31578.1	119234
D5	10	37358	124958
D6	10	42966.2	129828
D7	10	30998.5	124343
D8	10	31633.6	128443
D9	10	42975.2	122961
D10	10	39377.8	129044
D11	10	40105.8	133174
D12	10	144625	152225
E1	10	45964.6	140729
E2	10	40167.5	114139
E3	10	71035.7	138157
E4	10	33167.7	128436
E5	10	32844.5	127532
E6	10	33932.5	126514
E7	10	44011.2	129580
E8	10	36877.3	126750
E9	10	38950.8	130646
E10	10	35461.5	123898
E11	10	66822.5	129213
E12	10	61889.8	140761
F1	10	44738.2	153297
F2	10	39473.9	120645
F3	10	33176.8	139658
F4	10	41052.4	128067
F5	10	30390.4	130571
F6	10	66409.2	135358
F7	10	34078	133252
F8	10	32835.7	124989
F9	10	34943.3	130131
F10	10	34840.4	131101
F11	10	30484.8	128867
F12	10	54640.8	138852
G1	10	42642.4	148385
G2	10	46845.5	125657
G3	10	43232.8	146268
G4	10	31145.8	126060
G5	10	29633.1	130754
G6	10	30757	127584
G7	10	31771.9	125549
G8	10	37290.7	129411
G9	10	39805.5	138567
G10	10	38583.7	131901
G11	10	81832	147108
G12	10	43786.6	158400
H1	10	56750.3	149809
H2	10	43093	131379
H3	10	39985.7	148591
H4	10	36834.3	134264
H5	10	35612.3	141841
H6	10	45521.1	146543
H7	10	35955	141537
H8	10	38011.7	128371
H9	10	37826.9	136672
H10	10
H11	10
H12	10
A1	11	19745.6	97905.7
A2	11	32203.5	114769
A3	11	30768.6	119967
A4	11	35188	100481
A5	11	35356.4	113086
A6	11	51811	133416
A7	11	38770.1	118994
A8	11	190927	378580
A9	11	47285.3	131398
A10	11	32897.5	125742
A11	11	31663.7	141859
A12	11	35413.4	131594
B1	11	35018.2	131694
B2	11	38787.5	118835
B3	11	30685.7	121537
B4	11	30046.7	116425
B5	11	33245	138508
B6	11	26152.6	120645
B7	11	31360.7	124700
B8	11	113108	371596
B9	11	39277.4	123985
B10	11	39050.3	121419
B11	11	42086.4	141468
B12	11	44369.1	141652
C1	11	39899.1	137347
C2	11	40615.1	163508
C3	11	35692.9	132875
C4	11	29956.3	115728
C5	11	31432.2	124057
C6	11	32666.9	130119
C7	11	34569	133895
C8	11	35768	117310
C9	11	38874.4	119533
C10	11	32500.7	126663
C11	11	33881.6	135509
C12	11	43647.4	139646
D1	11	44239	136048
D2	11	31489.2	117200
D3	11	38778.6	135909
D4	11	31298	119171
D5	11	37700	124866
D6	11	43054.7	129554
D7	11	30752	123915
D8	11	31739.3	128936
D9	11	43197.4	123093
D10	11	39448.8	128597
D11	11	40260	133295
D12	11	143577	151832
E1	11	45780.3	140389
E2	11	39986.6	114028
E3	11	70679	138251
E4	11	33102.3	128504
E5	11	32688.3	127741
E6	11	34201.6	126590
E7	11	43839	129154
E8	11	37022.8	126950
E9	11	39187.6	130266
E10	11	35391.5	123735
E11	11	66441.6	128756
E12	11	61565.4	140407
F1	11	44586.1	152925
F2	11	39650.9	120064
F3	11	33658.9	139421
F4	11	41108.7	128022
F5	11	30620.6	130373
F6	11	66167.1	135062
F7	11	33795.6	133131
F8	11	32839.4	124642
F9	11	34682.5	130066
F10	11	34828.8	130742
F11	11	30490.1	128433
F12	11	54380.5	138436
G1	11	42974.6	147802
G2	11	46523.9	125836
G3	11	43283.7	146155
G4	11	31220.5	125775
G5	11	29709.2	130631
G6	11	30679.5	127640
G7	11	31648.8	125052
G8	11	37305.3	129165
G9	11	39796.5	138757
G10	11	38415.3	131574
G11	11	81431.1	146638
G12	11	43152.8	158446
H1	11	56559.8	149329
H2	11	43012.6	131031
H3	11	40114.4	148080
H4	11	37112.4	134346
H5	11	35735.6	141261
H6	11	45352.6	145497
H7	11	35964.9	140972
H8	11	38400.7	128018
H9	11	38075.1	136584
H10	11
H11	11
H12	11
A1	12	18963	97240.7
A2	12	31353.5	114513
A3	12	30483.4	119432
A4	12	35013.8	100988
A5	12	35047.9	113094
A6	12	51700.2	133285
A7	12	38326.2	118794
A8	12	191284	377944
A9	12	47410.8	131325
A10	12	32717.9	125558
A11	12	31932.9	142072
A12	12	35595	131281
B1	12	35304.6	131584
B2	12	38518.3	118565
B3	12	30686	121306
B4	12	30211.3	116750
B5	12	32835.7	138349
B6	12	26074.6	120844
B7	12	31403.6	125212
B8	12	113139	371476
B9	12	38890.9	124051
B10	12	38867	121328
B11	12	41321.6	141448
B12	12	44126.8	141774
C1	12	40138.4	136664
C2	12	40755.1	162528
C3	12	35318.6	132851
C4	12	30164.9	115394
C5	12	31588.9	124440
C6	12	32855	129899
C7	12	34547	133906
C8	12	35528.2	117336
C9	12	38792.3	119610
C10	12	32475.4	126402
C11	12	33843.3	135207
C12	12	43735	139415
D1	12	44259	135946
D2	12	31473.3	117352
D3	12	38542	135578
D4	12	31650.5	118615
D5	12	37539	125273
D6	12	43011.8	129167
D7	12	30423.7	124224
D8	12	31681.9	128597
D9	12	42731.3	122917
D10	12	39462.5	128701
D11	12	39950.7	133124
D12	12	142476	150971
E1	12	46140.2	140061
E2	12	40009.1	114437
E3	12	70522.1	137698
E4	12	32943.3	128289
E5	12	32689.6	127649
E6	12	33969.5	126778
E7	12	43942.7	129130
E8	12	36817.9	126961
E9	12	39058.7	130314
E10	12	35537.7	123444
E11	12	65580	129084
E12	12	61566.4	139804
F1	12	44772.4	153038
F2	12	39300.5	120142
F3	12	33450.8	139243
F4	12	41133.7	128284
F5	12	30692.9	130346
F6	12	66281.5	135095
F7	12	33863.4	132937
F8	12	33033	124651
F9	12	34809.2	129586
F10	12	34886.1	130536
F11	12	31024	128351
F12	12	54256.5	138449
G1	12	42346.5	147950
G2	12	46285.4	125755
G3	12	43542.9	145305
G4	12	30954.9	126054
G5	12	29532.3	130876
G6	12	30480.2	127642
G7	12	31841.2	125191
G8	12	37189	129242
G9	12	39868.8	139078
G10	12	38516.6	131317
G11	12	81267.8	145837
G12	12	43355.5	158035
H1	12	56968.3	148968
H2	12	43043.7	130530
H3	12	39924.5	147239
H4	12	36889.7	134000
H5	12	35551.7	141122
H6	12	45350.8	144930
H7	12	36150.6	140747
H8	12	38225.2	127529
H9	12	37666	136430
H10	12
H11	12
H12	12
A1	13	19710	97213.7
A2	13	31747.7	114354
A3	13	30439.7	119298
A4	13	35191.9	100241
A5	13	35218.6	112280
A6	13	51639	132921
A7	13	38230	118615
A8	13	190290	376855
A9	13	47254.3	131019
A10	13	32824.2	125747
A11	13	31636.7	141659
A12	13	35365.1	130797
B1	13	34361.4	131714
B2	13	38694.6	118357
B3	13	30747.3	121005
B4	13	30307.3	116817
B5	13	33131.1	138307
B6	13	26096.6	120420
B7	13	31526.2	124990
B8	13	112770	370649
B9	13	39099.7	123912
B10	13	39029.5	121440
B11	13	41864.6	141185
B12	13	44160.3	141389
C1	13	39734.2	136412
C2	13	40657.3	162456
C3	13	35376.4	132234
C4	13	30139.4	115841
C5	13	31234.1	123981
C6	13	32606.7	130151
C7	13	34779.1	133629
C8	13	35784.3	117005
C9	13	38908.8	118930
C10	13	32385.9	126218
C11	13	33441.2	135557
C12	13	43418.2	139209
D1	13	44022.3	135781
D2	13	31557.8	117035
D3	13	38956.2	135170
D4	13	31578.6	118760
D5	13	37502.3	124928
D6	13	42882.6	129352
D7	13	30762.4	124054
D8	13	31732.7	128561
D9	13	42741.3	122670
D10	13	39268.6	128533
D11	13	40376.3	132614
D12	13	140936	151015
E1	13	45831.5	139898
E2	13	40006.7	113793
E3	13	69921.5	137915
E4	13	32658.2	128204
E5	13	32405.5	127467
E6	13	33724.5	127219
E7	13	43639.8	129456
E8	13	36400.8	126851
E9	13	38717.1	130114
E10	13	35287.1	123619
E11	13	65135.5	128676
E12	13	61083.8	139640
F1	13	44469.4	152725
F2	13	39143	119929
F3	13	33393.6	139098
F4	13	41186	127916
F5	13	30463.1	130200
F6	13	66108.5	134830
F7	13	33769.3	133033
F8	13	32857.9	124529
F9	13	34640.5	129920
F10	13	34785.5	130079
F11	13	30082.4	128157
F12	13	54025	138195
G1	13	43049.1	147822
G2	13	46469.1	125362
G3	13	43135	145035
G4	13	31036.1	125678
G5	13	29566.6	130839
G6	13	30631.2	127331
G7	13	31717.1	125401
G8	13	37245.3	129011
G9	13	39509	138580
G10	13	38342.1	131192
G11	13	80572.1	145865
G12	13	43038	158315
H1	13	56711.1	148578
H2	13	43148.5	130515
H3	13	39887.2	147160
H4	13	37234.5	133943
H5	13	35868.4	140866
H6	13	45459.1	144975
H7	13	36296.3	140059
H8	13	38247.6	127247
H9	13	37896.5	136500
H10	13
H11	13
H12	13
A1	14	19085	97037.4
A2	14	31566.7	114351
A3	14	30249.4	119561
A4	14	35333.1	100324
A5	14	35116.6	112687
A6	14	51516.1	132615
A7	14	38426.1	118471
A8	14	189491	376861
A9	14	46733.8	130892
A10	14	32852.4	125186
A11	14	31724.8	141877
A12	14	34929.2	130299
B1	14	34372	131105
B2	14	38553.3	118374
B3	14	30773.5	120646
B4	14	29721.4	116858
B5	14	32808.9	137954
B6	14	26075.1	120205
B7	14	31198.5	124937
B8	14	111532	371276
B9	14	39154.6	123389
B10	14	38576.3	121179
B11	14	41762.3	140732
B12	14	44080.7	140709
C1	14	40047.8	136360
C2	14	40603.1	162360
C3	14	35608.3	132396
C4	14	30131.1	115506
C5	14	31501.8	124146
C6	14	32608.3	129648
C7	14	34603.1	133607
C8	14	35340.7	116700
C9	14	38832.1	119138
C10	14	32395.6	125710
C11	14	33810.4	135127
C12	14	43182.1	138960
D1	14	43747.3	135905
D2	14	31694.1	116868
D3	14	38571.8	135133
D4	14	31543.7	118463
D5	14	37693	124629
D6	14	42791	128768
D7	14	30674.4	124030
D8	14	31708.2	129257
D9	14	42781.3	122260
D10	14	39334.3	128069
D11	14	40006	132364
D12	14	140473	150782
E1	14	45499.6	139752
E2	14	39786.9	113694
E3	14	69672.3	137724
E4	14	33060.7	128269
E5	14	32644.8	127080
E6	14	33723.1	126933
E7	14	43876.8	128919
E8	14	36465.3	126749
E9	14	39015.3	129717
E10	14	35534.1	123443
E11	14	65137.4	128485
E12	14	61251.6	139610
F1	14	44825.1	152592
F2	14	39060.9	119591
F3	14	33709.8	139332
F4	14	40742.9	128272
F5	14	30279.9	130065
F6	14	66363.1	134506
F7	14	33826.5	132656
F8	14	32606.1	124517
F9	14	34721.1	129558
F10	14	34393.1	129828
F11	14	30391.3	127805
F12	14	54227.5	137683
G1	14	42979.5	147457
G2	14	46810	125383
G3	14	43956.6	144786
G4	14	30890.4	125389
G5	14	29674	130332
G6	14	30530	127364
G7	14	31799.1	124758
G8	14	37269.4	128804
G9	14	39617	138438
G10	14	38404.8	130888
G11	14	80698.6	145251
G12	14	43162.5	158484
H1	14	57143.3	147970
H2	14	43594.2	130327
H3	14	40420.5	146769
H4	14	37663.2	133264
H5	14	36031.6	140435
H6	14	45578.9	144601
H7	14	36731.2	139819
H8	14	38758.7	127354
H9	14	38296.4	136195
H10	14
H11	14
H12	14
A1	15	19457.4	96639.3
A2	15	31366.6	114403
A3	15	30462.9	119500
A4	15	34865.8	100647
A5	15	34937.5	112481
A6	15	51364.7	132360
A7	15	38214.1	118779
A8	15	188920	376012
A9	15	47217.3	130865
A10	15	32686.4	124911
A11	15	31625.1	141677
A12	15	35131.5	129769
B1	15	34780.8	131043
B2	15	38702.9	117800
B3	15	30674	120787
B4	15	30103.7	116568
B5	15	33123.8	137806
B6	15	26052.3	120696
B7	15	31851.1	124931
B8	15	111529	371265
B9	15	39051.4	123543
B10	15	38610.2	120641
B11	15	41650.2	141140
B12	15	43502	140311
C1	15	39920.7	136387
C2	15	40916	162203
C3	15	35531.3	131891
C4	15	30078.2	115497
C5	15	31393.6	124160
C6	15	32602.6	129622
C7	15	34614	134121
C8	15	35719.2	116633
C9	15	38721.2	118841
C10	15	32262.4	125359
C11	15	33522.1	134894
C12	15	43259.4	139089
D1	15	43793.6	135948
D2	15	31648.9	116900
D3	15	38743.6	134884
D4	15	31593.6	118571
D5	15	37464.7	124745
D6	15	42782.2	129032
D7	15	30659.9	124132
D8	15	31930.1	129693
D9	15	42305.4	122308
D10	15	39285.8	128030
D11	15	39631.1	132479
D12	15	139159	150384
E1	15	45544.8	139864
E2	15	39219.7	113790
E3	15	69539.2	137592
E4	15	32743.1	128584
E5	15	32800.2	127458
E6	15	33711.1	127190
E7	15	43695.6	128991
E8	15	36406.4	126784
E9	15	38994.3	129744
E10	15	35120.7	122891
E11	15	64436.9	128763
E12	15	60924.2	139694
F1	15	45022.7	152476
F2	15	39661.3	119472
F3	15	34269.8	139208
F4	15	40721.6	128076
F5	15	30731.3	129725
F6	15	66217.6	134519
F7	15	33744.1	132771
F8	15	32906.9	124593
F9	15	34742.3	129877
F10	15	34657.3	129784
F11	15	30465.5	127554
F12	15	53949.5	137489
G1	15	44019.3	147020
G2	15	47290.3	125648
G3	15	44184.6	144259
G4	15	31002.1	125547
G5	15	29585.3	130299
G6	15	30596.4	127146
G7	15	31544.9	124868
G8	15	37076.9	128763
G9	15	39506.6	138718
G10	15	38444.2	130679
G11	15	80239	145527
G12	15	42910.4	158670
H1	15	57177	147413
H2	15	43864.9	130089
H3	15	40791.6	146270
H4	15	38508.3	133551
H5	15	36970.1	140286
H6	15	46613.8	144181
H7	15	37225.1	139723
H8	15	39510.9	127416
H9	15	39195.1	136497
H10	15
H11	15
H12	15
A1	16	19190.5	96300.3
A2	16	31378.3	113785
A3	16	30496.6	119311
A4	16	35042.4	99755.8
A5	16	35140	112262
A6	16	51027.1	132745
A7	16	38064.8	118484
A8	16	188652	375449
A9	16	46683.9	130312
A10	16	32561.7	124479
A11	16	31609	141436
A12	16	35013.6	129312
B1	16	35067.4	130425
B2	16	38966.7	118180
B3	16	30664.8	120713
B4	16	29898.2	116251
B5	16	32965.6	137705
B6	16	25941.6	120494
B7	16	31138.4	124623
B8	16	112023	371072
B9	16	39046.1	123057
B10	16	38517.7	120446
B11	16	41419	140657
B12	16	43775.9	139552
C1	16	39582.9	135899
C2	16	40644.5	161404
C3	16	35162.9	131648
C4	16	30449.6	115647
C5	16	31318.1	124365
C6	16	32584.4	129579
C7	16	34303.5	133821
C8	16	35469.2	116330
C9	16	39108.6	118573
C10	16	32296.5	124927
C11	16	33575.7	134585
C12	16	42648.4	138346
D1	16	44110.6	135393
D2	16	31446	116516
D3	16	38279.8	134844
D4	16	31425.6	118560
D5	16	37666.1	124663
D6	16	42714.8	128238
D7	16	30508.6	123950
D8	16	32010.2	129362
D9	16	42341.3	121823
D10	16	39075.7	127699
D11	16	39910.5	132118
D12	16	138796	149811
E1	16	45621.4	139967
E2	16	39500.2	113311
E3	16	69057.6	137612
E4	16	32638	128518
E5	16	32686.3	127054
E6	16	33650.3	127060
E7	16	43330.5	128525
E8	16	36424.3	126856
E9	16	38814.9	129371
E10	16	35135.4	122994
E11	16	64280.7	127917
E12	16	60606.3	139120
F1	16	46275.6	152142
F2	16	40132.3	118977
F3	16	34713.9	139083
F4	16	40684.8	128028
F5	16	30247.5	129447
F6	16	66034.7	134240
F7	16	33566.7	132633
F8	16	32688.9	124370
F9	16	34611.8	129509
F10	16	34596.7	129126
F11	16	30557.5	127576
F12	16	53645.8	136965
G1	16	45104.4	146749
G2	16	48531.7	125430
G3	16	45757.2	144080
G4	16	31180.2	125638
G5	16	29628	130156
G6	16	30735.7	127009
G7	16	31793.4	124691
G8	16	37228.1	128799
G9	16	39293.8	138164
G10	16	38513.1	130124
G11	16	79626.3	144915
G12	16	42852.3	158943
H1	16	58316.4	147308
H2	16	45098.8	129786
H3	16	41837.6	145805
H4	16	39398.3	133078
H5	16	38454.7	139940
H6	16	47734.9	143635
H7	16	38620.2	139386
H8	16	40606.9	127262
H9	16	40248.2	136317
H10	16
H11	16
H12	16
A1	17	19540.9	96485.4
A2	17	31303.4	113640
A3	17	30347.2	119436
A4	17	34635.5	99999.1
A5	17	35002.3	112163
A6	17	50923.9	132193
A7	17	37932.8	118331
A8	17	188423	375667
A9	17	46792.4	130398
A10	17	32713.7	124497
A11	17	31441.2	141361
A12	17	35125.1	129207
B1	17	34426.4	130500
B2	17	38560.9	118039
B3	17	30761.7	120117
B4	17	29903.5	116671
B5	17	33168.9	137293
B6	17	26127	120496
B7	17	31569.6	124765
B8	17	112194	369791
B9	17	38989.8	122750
B10	17	38563.5	120390
B11	17	41595.3	140741
B12	17	43426.1	139752
C1	17	39904.3	135990
C2	17	40360.3	161729
C3	17	34863.2	131526
C4	17	30352	116067
C5	17	31289.1	123940
C6	17	32477.7	129768
C7	17	34324.1	133979
C8	17	35537.3	116489
C9	17	38981.4	118219
C10	17	32273	124728
C11	17	33861.8	134702
C12	17	43299.9	138301
D1	17	44158.9	135055
D2	17	31805.3	116153
D3	17	38819.9	134667
D4	17	31418.6	118500
D5	17	37677.7	124719
D6	17	42556.7	128890
D7	17	30607.4	124154
D8	17	31972.1	129205
D9	17	42547.3	121906
D10	17	38854.5	127472
D11	17	40045.5	132163
D12	17	138173	149881
E1	17	46050.3	139505
E2	17	39925.1	113309
E3	17	68763.4	137678
E4	17	32702	128569
E5	17	32571.4	127352
E6	17	33510.8	127152
E7	17	43520.5	128698
E8	17	36318.4	126958
E9	17	38815.4	129244
E10	17	35088.7	122883
E11	17	64105.8	128530
E12	17	60310.9	139429
F1	17	46887.9	152605
F2	17	40775.2	119279
F3	17	36005.2	139224
F4	17	40556.5	128275
F5	17	30315.4	129616
F6	17	65885.5	134218
F7	17	33824.4	132869
F8	17	32571.2	124603
F9	17	34643.1	129728
F10	17	34243.2	129231
F11	17	30200	127105
F12	17	53962.1	137034
G1	17	48099.3	147311
G2	17	50944.4	125762
G3	17	48858.4	143930
G4	17	31254.1	125007
G5	17	29654.5	130506
G6	17	30553.2	127279
G7	17	31650.2	124792
G8	17	37234.3	128277
G9	17	39375.2	138532
G10	17	37922.5	130374
G11	17	78996.6	144571
G12	17	43071.7	158554
H1	17	61214.3	146622
H2	17	46811.2	129924
H3	17	44217.7	145411
H4	17	42531.4	132863
H5	17	41219.7	139973
H6	17	50867.8	143888
H7	17	41057.3	139052
H8	17	43160	127420
H9	17	42917.1	136504
H10	17
H11	17
H12	17
A1	18	19327.7	96432
A2	18	31368.3	113556
A3	18	30709.8	119056
A4	18	34484.5	99705.3
A5	18	34975.3	111707
A6	18	51128.7	131605
A7	18	37888.7	118422
A8	18	187861	373712
A9	18	46561.7	130315
A10	18	32283.3	123909
A11	18	31480.4	141048
A12	18	34644.3	128664
B1	18	34731.7	130426
B2	18	39077.9	117885
B3	18	30297.9	120253
B4	18	30128.3	116228
B5	18	33247.6	137099
B6	18	26390.5	120519
B7	18	30967.5	125109
B8	18	111674	370387
B9	18	38621.2	122699
B10	18	38432.5	120000
B11	18	41167.6	140712
B12	18	43575.4	138711
C1	18	39429.3	135741
C2	18	40618.6	161492
C3	18	35734.4	131704
C4	18	30283.5	115481
C5	18	31164.3	124251
C6	18	32510	129274
C7	18	34281.7	133719
C8	18	35465.3	116313
C9	18	38933.9	118729
C10	18	31968.5	124360
C11	18	33616.5	134401
C12	18	43210.5	137667
D1	18	44426.7	135192
D2	18	32078.9	116232
D3	18	39263.4	134152
D4	18	31619.7	118429
D5	18	37488.9	124210
D6	18	42485.6	128449
D7	18	30684	124244
D8	18	32016.8	129822
D9	18	42207.5	121444
D10	18	39020.8	127174
D11	18	40179.8	131855
D12	18	137016	149156
E1	18	46324.4	139399
E2	18	39742.1	113422
E3	18	68849.5	137458
E4	18	32765.6	128656
E5	18	32455.3	126818
E6	18	33723.7	127492
E7	18	43516.6	128177
E8	18	36597.9	126938
E9	18	38702.1	129377
E10	18	35288.6	122687
E11	18	63047.3	127760
E12	18	59874.8	138848
F1	18	49183.6	151952
F2	18	43459.4	118960
F3	18	38534.8	139109
F4	18	40609.5	128235
F5	18	30451.5	129445
F6	18	65915.8	134073
F7	18	33416	132450
F8	18	32617.4	124486
F9	18	34778.4	129267
F10	18	34317.2	128776
F11	18	30336.1	127040
F12	18	53635.1	136685
G1	18	53796.2	146838
G2	18	55950	125718
G3	18	54612.5	143391
G4	18	31086	124886
G5	18	29721.2	129929
G6	18	30661.8	126900
G7	18	31726.3	124862
G8	18	37076.4	128465
G9	18	39222.1	138191
G10	18	37950.2	130168
G11	18	78485.9	144166
G12	18	42758.2	158383
H1	18	65002.4	146331
H2	18	50782.5	129701
H3	18	47904.2	145568
H4	18	47554.3	132754
H5	18	46542	139757
H6	18	55614.2	143325
H7	18	45947.4	138884
H8	18	47625.5	127177
H9	18	47764.3	136201
H10	18
H11	18
H12	18
A1	19	19348.8	96553.3
A2	19	31400.7	113203
A3	19	30412.3	119214
A4	19	34492	99547.8
A5	19	34694	111748
A6	19	50385.1	131260
A7	19	37887.2	118111
A8	19	188003	373204
A9	19	46390.4	129821
A10	19	32291.6	123707
A11	19	31585.3	141094
A12	19	34363.1	128423
B1	19	35039.6	130114
B2	19	39077	117871
B3	19	30398.4	120107
B4	19	29661.2	116574
B5	19	32657	137299
B6	19	25868.6	120510
B7	19	31255.4	124964
B8	19	111716	370410
B9	19	38464.8	122635
B10	19	38534.7	119655
B11	19	41110.4	140739
B12	19	43541.1	138426
C1	19	39858.2	135817
C2	19	40428.9	162009
C3	19	35670.6	131331
C4	19	30346.3	115846
C5	19	31284.7	124261
C6	19	32509.1	129278
C7	19	36562.9	133911
C8	19	35674.5	115808
C9	19	38836.3	118289
C10	19	32110.3	124149
C11	19	33561.1	134302
C12	19	42885.1	137959
D1	19	45144.1	135147
D2	19	32351.8	116249
D3	19	39824.4	134408
D4	19	31422.9	118679
D5	19	37585.9	124585
D6	19	42394.1	128720
D7	19	30839	124474
D8	19	31993.9	129518
D9	19	42072.8	121419
D10	19	39056.6	127403
D11	19	39978.6	131770
D12	19	136652	149436
E1	19	46878.1	139679
E2	19	40074.2	113071
E3	19	69183.7	137736
E4	19	32680.3	128859
E5	19	32878.5	127042
E6	19	33522.5	127400
E7	19	43442.7	128417
E8	19	36302.7	127190
E9	19	39117.9	128911
E10	19	35407.1	122667
E11	19	63082.7	127935
E12	19	59557.6	138642
F1	19	54241.5	152257
F2	19	47752.5	118943
F3	19	43722.7	139268
F4	19	40645.8	128300
F5	19	30479.8	129492
F6	19	65826.2	133910
F7	19	33617.8	132712
F8	19	33096.6	124305
F9	19	34918.1	129604
F10	19	34338.1	128771
F11	19	30468.2	126956
F12	19	53641.7	136850
G1	19	64566.1	146808
G2	19	65035.2	125704
G3	19	66347.3	143158
G4	19	31109.3	124951
G5	19	29784.5	130050
G6	19	30512.5	127032
G7	19	31903.4	124575
G8	19	37067.4	128611
G9	19	39379.9	138837
G10	19	37783.6	129937
G11	19	78500.9	144046
G12	19	43060.4	158337
H1	19	73783.7	146231
H2	19	59216	129142
H3	19	55780.2	145148
H4	19	57149.4	132572
H5	19	56592.7	139564
H6	19	65270.3	143206
H7	19	55459.2	138721
H8	19	56710.6	127319
H9	19	57071.8	136765
H10	19
H11	19
H12	19
A1	20	19316.6	96161.4
A2	20	31746.4	112342
A3	20	30873.5	119065
A4	20	34637.9	99529.7
A5	20	34938.6	111511
A6	20	50715.1	131428
A7	20	38233.9	118544
A8	20	187616	373408
A9	20	46840.8	130059
A10	20	32564.9	123756
A11	20	31386.8	141092
A12	20	34242.9	128394
B1	20	34889.1	129984
B2	20	39303.7	117956
B3	20	31275.8	119429
B4	20	29887.4	116710
B5	20	32874.1	137168
B6	20	26125.3	120580
B7	20	31438.4	125027
B8	20	112076	370674
B9	20	38891.7	122546
B10	20	38519.6	119443
B11	20	41475.6	140837
B12	20	43340.6	138310
C1	20	40382.3	135688
C2	20	41155.9	162268
C3	20	35876.2	130972
C4	20	30263.7	116024
C5	20	31321	124300
C6	20	32099.2	129054
C7	20	36481.9	133991
C8	20	35784.2	116111
C9	20	38618.5	117978
C10	20	32254.1	124026
C11	20	33607.9	134339
C12	20	42063.5	137647
D1	20	46476.4	135298
D2	20	33560.3	115930
D3	20	40740.6	134021
D4	20	31942.3	118078
D5	20	37677.1	124425
D6	20	42485.9	128556
D7	20	30852.7	124540
D8	20	32260.4	130229
D9	20	42098	121161
D10	20	38961.2	127033
D11	20	39743.4	131912
D12	20	135256	149588
E1	20	47533.4	139777
E2	20	41040.9	112925
E3	20	69883.8	137600
E4	20	32688.3	128951
E5	20	32557.3	127137
E6	20	33668.5	127640
E7	20	43511.2	128333
E8	20	36576.3	126974
E9	20	39062.2	128897
E10	20	35116.3	122316
E11	20	62645.7	127657
E12	20	59369.5	138918
F1	20	62920.9	151802
F2	20	55153.1	118751
F3	20	53093.7	139200
F4	20	40628.1	128646
F5	20	30412.5	129270
F6	20	65640.7	133755
F7	20	33285.5	132368
F8	20	32957.4	124300
F9	20	35082.8	129822
F10	20	34276.7	128707
F11	20	30534.1	126807
F12	20	53394.7	136398
G1	20	83599	146062
G2	20	80976.7	125991
G3	20	86135.6	142962
G4	20	31289.9	124776
G5	20	29679.1	130163
G6	20	30874.5	127010
G7	20	32104.1	124677
G8	20	37208.1	128588
G9	20	39863.3	138359
G10	20	37871	130041
G11	20	78008.5	143946
G12	20	42934.3	158848
H1	20	87901	145432
H2	20	72184	129434
H3	20	69140.6	145004
H4	20	73860.5	132849
H5	20	73643.4	139741
H6	20	81698.6	142984
H7	20	71682.7	138626
H8	20	72485.4	127143
H9	20	72483.9	136286
H10	20
H11	20
H12	20
A1	21	20379.9	96358.8
A2	21	32356.9	112551
A3	21	32214	119100
A4	21	34511.8	99211.8
A5	21	34991.4	111383
A6	21	50429.6	131223
A7	21	38435.7	118418
A8	21	187609	372756
A9	21	47221.4	129493
A10	21	32454.4	123193
A11	21	31506.1	140816
A12	21	34166.7	128061
B1	21	35834.3	129833
B2	21	39919.2	117515
B3	21	31852.9	119743
B4	21	29963.9	116090
B5	21	32623.9	137160
B6	21	26144	120451
B7	21	31712.3	125087
B8	21	112976	371483
B9	21	39033.1	122269
B10	21	38184.6	119111
B11	21	41422.1	140452
B12	21	43353.1	137605
C1	21	40666.3	135507
C2	21	41322.9	161947
C3	21	36410.1	131125
C4	21	30126.3	116140
C5	21	31411	124318
C6	21	32360.9	129161
C7	21	36845.2	134210
C8	21	35772.3	116141
C9	21	39053.5	118204
C10	21	32243.7	123342
C11	21	33509	134151
C12	21	42819.2	137680
D1	21	49135.5	135164
D2	21	35346.1	115938
D3	21	43170.6	133927
D4	21	31781	118303
D5	21	37593.8	124583
D6	21	42173.5	128870
D7	21	30899	124710
D8	21	33019.5	130329
D9	21	42490	121357
D10	21	39065.7	127022
D11	21	39465.8	131501
D12	21	134553	149039
E1	21	49630.5	139448
E2	21	42638.7	112946
E3	21	71552.8	137581
E4	21	32909.7	129101
E5	21	32671.4	126907
E6	21	33845.5	127848
E7	21	43808.5	128041
E8	21	36982.3	127385
E9	21	39223.3	128663
E10	21	35020.6	122237
E11	21	62371.4	127237
E12	21	59067.3	138593
F1	21	80782.6	151809
F2	21	69900.7	118340
F3	21	70521.2	139132
F4	21	40244.4	128656
F5	21	30717.6	129270
F6	21	65632.4	133731
F7	21	33761.2	132829
F8	21	33507.7	124209
F9	21	35474.8	129652
F10	21	34078.6	128455
F11	21	30318.6	126611
F12	21	53541	135841
G1	21	117017	145982
[truncated: 10,391 more rows]

## Sheet: Amplification Data
Block Type	96alum
Chemistry	SYBR_GREEN
Experiment File Name	D:\ShuJu\LZM\spx 5-8 iaa lp.eds
Experiment Run End Time	2023-08-17 02:37:08 AM CST
Instrument Type	sds7500
Passive Reference	ROX
Well	Cycle	Target Name	Rn	ΔRn
A1	1	SPX5	0.192043	-0.00287021
A1	2	SPX5	0.19406	-0.00128802
A1	3	SPX5	0.194504	-0.00127871
A1	4	SPX5	0.19612	-9.71697e-05
A1	5	SPX5	0.197951	0.00129935
A1	6	SPX5	0.200611	0.0035245
A1	7	SPX5	0.196231	-0.00128998
A1	8	SPX5	0.196345	-0.001611
A1	9	SPX5	0.200963	0.00257222
A1	10	SPX5	0.199012	0.000186959
A1	11	SPX5	0.201679	0.00241938
A1	12	SPX5	0.195011	-0.00468338
A1	13	SPX5	0.202749	0.00261933
A1	14	SPX5	0.196677	-0.00388711
A1	15	SPX5	0.201341	0.000341866
A1	16	SPX5	0.199277	-0.00215628
A1	17	SPX5	0.202527	0.000659244
A1	18	SPX5	0.200428	-0.0018746
A1	19	SPX5	0.200395	-0.0023424
A1	20	SPX5	0.200877	-0.00229517
A1	21	SPX5	0.2115	0.00789296
A1	22	SPX5	0.217994	0.0139525
A1	23	SPX5	0.23828	0.0338033
A1	24	SPX5	0.278408	0.0734973
A1	25	SPX5	0.341234	0.135888
A1	26	SPX5	0.446139	0.240359
A1	27	SPX5	0.615291	0.409076
A1	28	SPX5	0.821159	0.61451
A1	29	SPX5	0.995764	0.788679
A1	30	SPX5	1.13017	0.92265
A1	31	SPX5	1.2528	1.04484
A1	32	SPX5	1.36194	1.15355
A1	33	SPX5	1.45245	1.24363
A1	34	SPX5	1.522	1.31274
A1	35	SPX5	1.59134	1.38165
A1	36	SPX5	1.64799	1.43786
A1	37	SPX5	1.67519	1.46463
A1	38	SPX5	1.70762	1.49663
A1	39	SPX5	1.73835	1.52692
A1	40	SPX5	1.75647	1.5446
A2	1	SPX5	0.26853	-0.00539151
A2	2	SPX5	0.272473	-0.00165186
A2	3	SPX5	0.272691	-0.00163601
A2	4	SPX5	0.276504	0.00197359
A2	5	SPX5	0.277952	0.0032192
A2	6	SPX5	0.271125	-0.00381049
A2	7	SPX5	0.276231	0.00109312
A2	8	SPX5	0.27687	0.00152934
A2	9	SPX5	0.27509	-0.000453117
A2	10	SPX5	0.272757	-0.00298861
A2	11	SPX5	0.280595	0.00464596
A2	12	SPX5	0.273798	-0.00235377
A2	13	SPX5	0.277626	0.00127147
A2	14	SPX5	0.276051	-0.000505588
A2	15	SPX5	0.274177	-0.00258246
A2	16	SPX5	0.275767	-0.00119477
A2	17	SPX5	0.275462	-0.00170329
A2	18	SPX5	0.276237	-0.00113068
A2	19	SPX5	0.277384	-0.000186364
A2	20	SPX5	0.282585	0.00481247
A2	21	SPX5	0.287486	0.00951074
A2	22	SPX5	0.305227	0.0270483
A2	23	SPX5	0.324905	0.0465244
A2	24	SPX5	0.365791	0.0872075
A2	25	SPX5	0.448135	0.169349
A2	26	SPX5	0.58932	0.310331
A2	27	SPX5	0.826606	0.547414
A2	28	SPX5	1.1664	0.887002
A2	29	SPX5	1.51189	1.2323
A2	30	SPX5	1.79345	1.51365
A2	31	SPX5	1.98043	1.70043
A2	32	SPX5	2.1114	1.8312
A2	33	SPX5	2.23605	1.95564
A2	34	SPX5	2.32364	2.04303
A2	35	SPX5	2.39503	2.11421
A2	36	SPX5	2.44309	2.16207
A2	37	SPX5	2.48963	2.20841
A2	38	SPX5	2.52306	2.24163
A2	39	SPX5	2.54214	2.26051
A2	40	SPX5	2.56822	2.2864
A3	1	SPX5	0.247686	-0.00900152
A3	2	SPX5	0.251257	-0.00534167
A3	3	SPX5	0.257855	0.00134589
A3	4	SPX5	0.254605	-0.00181522
A3	5	SPX5	0.255942	-0.000389387
A3	6	SPX5	0.257365	0.00112287
A3	7	SPX5	0.258129	0.0019768
A3	8	SPX5	0.254537	-0.00152671
A3	9	SPX5	0.25344	-0.00253459
A3	10	SPX5	0.259115	0.00323022
A3	11	SPX5	0.256476	0.000680748
A3	12	SPX5	0.255237	-0.000469921
A3	13	SPX5	0.255157	-0.000460117
A3	14	SPX5	0.253004	-0.00252438
A3	15	SPX5	0.25492	-0.000519277
A3	16	SPX5	0.255606	0.000256834
A3	17	SPX5	0.254087	-0.00117332
A3	18	SPX5	0.257945	0.00277367
A3	19	SPX5	0.255108	2.5893e-05
A3	20	SPX5	0.2593	0.00430762
A3	21	SPX5	0.27048	0.0155762
A3	22	SPX5	0.280884	0.0260694
A3	23	SPX5	0.307324	0.0525988
A3	24	SPX5	0.352582	0.0979465
A3	25	SPX5	0.434689	0.180143
A3	26	SPX5	0.589295	0.334837
A3	27	SPX5	0.824832	0.570464
A3	28	SPX5	1.11524	0.860964
A3	29	SPX5	1.36397	1.10978
A3	30	SPX5	1.55909	1.30499
A3	31	SPX5	1.72544	1.47143
A3	32	SPX5	1.86605	1.61213
A3	33	SPX5	1.9825	1.72866
A3	34	SPX5	2.08026	1.82651
A3	35	SPX5	2.15829	1.90463
A3	36	SPX5	2.21835	1.96478
A3	37	SPX5	2.26077	2.00729
A3	38	SPX5	2.30456	2.05117
A3	39	SPX5	2.33914	2.08584
A3	40	SPX5	2.35792	2.10471
A4	1	SPX6	0.344075	-0.00267915
A4	2	SPX6	0.347678	0.000784183
A4	3	SPX6	0.348709	0.00167716
A4	4	SPX6	0.345796	-0.00137513
A4	5	SPX6	0.344273	-0.00303699
A4	6	SPX6	0.347119	-0.000330038
A4	7	SPX6	0.3515	0.00391284
A4	8	SPX6	0.34764	-8.67181e-05
A4	9	SPX6	0.347124	-0.000741677
A4	10	SPX6	0.349495	0.00149058
A4	11	SPX6	0.350197	0.00205377
A4	12	SPX6	0.346711	-0.00157031
A4	13	SPX6	0.351073	0.00265224
A4	14	SPX6	0.35219	0.00363039
A4	15	SPX6	0.346418	-0.00228039
A4	16	SPX6	0.351282	0.00244472
A4	17	SPX6	0.346359	-0.00261738
A4	18	SPX6	0.345865	-0.00325022
A4	19	SPX6	0.346487	-0.00276644
A4	20	SPX6	0.348016	-0.00137645
A4	21	SPX6	0.34786	-0.00167148
A4	22	SPX6	0.344061	-0.00560941
A4	23	SPX6	0.34822	-0.00158883
A4	24	SPX6	0.350096	0.000147908
A4	25	SPX6	0.354338	0.00425086
A4	26	SPX6	0.356267	0.006041
A4	27	SPX6	0.360597	0.0102326
A4	28	SPX6	0.372902	0.0223991
A4	29	SPX6	0.390874	0.0402319
A4	30	SPX6	0.431434	0.0806531
A4	31	SPX6	0.498571	0.147651
A4	32	SPX6	0.596859	0.2458
A4	33	SPX6	0.741868	0.390671
A4	34	SPX6	0.920037	0.5687
A4	35	SPX6	1.07496	0.723488
A4	36	SPX6	1.20682	0.855206
A4	37	SPX6	1.33971	0.98796
A4	38	SPX6	1.47824	1.12635
A4	39	SPX6	1.58972	1.23769
A4	40	SPX6	1.68991	1.33774
A5	1	SPX6	0.302575	-0.00414541
A5	2	SPX6	0.306938	-0.000237333
A5	3	SPX6	0.308214	0.0005848
A5	4	SPX6	0.308714	0.000630045
A5	5	SPX6	0.30736	-0.0011783
A5	6	SPX6	0.306311	-0.00268173
A5	7	SPX6	0.312598	0.00315003
A5	8	SPX6	0.311448	0.00154616
A5	9	SPX6	0.312227	0.00186994
A5	10	SPX6	0.314494	0.00368294
A5	11	SPX6	0.312649	0.00138363
A5	12	SPX6	0.309902	-0.00181838
A5	13	SPX6	0.313668	0.00149329
A5	14	SPX6	0.311629	-0.000999821
A5	15	SPX6	0.310607	-0.00247661
A5	16	SPX6	0.313018	-0.000520768
A5	17	SPX6	0.312066	-0.00192698
A5	18	SPX6	0.313099	-0.00134846
A5	19	SPX6	0.310466	-0.00443594
A5	20	SPX6	0.313319	-0.0020376
A5	21	SPX6	0.314153	-0.00165836
A5	22	SPX6	0.311409	-0.00485647
A5	23	SPX6	0.319171	0.0024511
A5	24	SPX6	0.318516	0.00134192
A5	25	SPX6	0.315628	-0.00200079
A5	26	SPX6	0.321387	0.00330376
A5	27	SPX6	0.325041	0.0065026
A5	28	SPX6	0.332773	0.0137807
A5	29	SPX6	0.347827	0.02838
A5	30	SPX6	0.37584	0.0559385
A5	31	SPX6	0.435513	0.115157
A5	32	SPX6	0.524616	0.203806
A5	33	SPX6	0.654649	0.333384
A5	34	SPX6	0.816559	0.49484
A5	35	SPX6	0.983405	0.661231
A5	36	SPX6	1.11693	0.794297
A5	37	SPX6	1.26836	0.94528
A5	38	SPX6	1.39389	1.07036
A5	39	SPX6	1.51895	1.19496
A5	40	SPX6	1.63499	1.31055
A6	1	SPX6	0.377423	-0.00787961
A6	2	SPX6	0.379918	-0.00549149
A6	3	SPX6	0.383756	-0.00176074
A6	4	SPX6	0.38428	-0.00134357
A6	5	SPX6	0.383888	-0.00184198
A6	6	SPX6	0.386284	0.000447317
A6	7	SPX6	0.387643	0.00169946
A6	8	SPX6	0.385973	-7.76469e-05
A6	9	SPX6	0.385422	-0.000734935
A6	10	SPX6	0.390207	0.00394311
A6	11	SPX6	0.388343	0.00197169
A6	12	SPX6	0.387892	0.00141403
A6	13	SPX6	0.388496	0.00191095
A6	14	SPX6	0.388464	0.00177223
A6	15	SPX6	0.388068	0.00126931
A6	16	SPX6	0.3844	-0.00250473
A6	17	SPX6	0.385224	-0.00178816
A6	18	SPX6	0.388502	0.00138352
A6	19	SPX6	0.383856	-0.00336923
A6	20	SPX6	0.385877	-0.00145503
A6	21	SPX6	0.384305	-0.00313412
A6	22	SPX6	0.384892	-0.00265439
A6	23	SPX6	0.386332	-0.00132055
A6	24	SPX6	0.387327	-0.000432858
A6	25	SPX6	0.390229	0.00236254
A6	26	SPX6	0.392217	0.00424379
A6	27	SPX6	0.396712	0.00863197
A6	28	SPX6	0.407307	0.0191197
A6	29	SPX6	0.425891	0.0375973
A6	30	SPX6	0.463562	0.0751608
A6	31	SPX6	0.521546	0.133038
A6	32	SPX6	0.623197	0.234583
A6	33	SPX6	0.749362	0.36064
A6	34	SPX6	0.90407	0.515242
A6	35	SPX6	1.04646	0.657524
A6	36	SPX6	1.16722	0.778176
A6	37	SPX6	1.29793	0.908778
A6	38	SPX6	1.41614	1.02688
A6	39	SPX6	1.5132	1.12384
A6	40	SPX6	1.61319	1.22372
A7	1	SPX7	0.319114	-0.00777797
A7	2	SPX7	0.32357	-0.00307545
A7	3	SPX7	0.32431	-0.00208832
A7	4	SPX7	0.327208	0.00105665
A7	5	SPX7	0.32506	-0.000844659
A7	6	SPX7	0.327549	0.00189047
A7	7	SPX7	0.328495	0.00308341
A7	8	SPX7	0.324431	-0.00073407
A7	9	SPX7	0.327174	0.00225601
A7	10	SPX7	0.324439	-0.000232313
A7	11	SPX7	0.325814	0.00138925
A7	12	SPX7	0.322628	-0.00154984
A7	13	SPX7	0.322304	-0.00162731
A7	14	SPX7	0.324351	0.000666297
A7	15	SPX7	0.321726	-0.0017126
A7	16	SPX7	0.321264	-0.00192766
A7	17	SPX7	0.320566	-0.00237909
A7	18	SPX7	0.319945	-0.00275279
A7	19	SPX7	0.320777	-0.00167432
A7	20	SPX7	0.322531	0.00032597
A7	21	SPX7	0.324577	0.00261916
A7	22	SPX7	0.325947	0.00423574
A7	23	SPX7	0.33562	0.0141551
A7	24	SPX7	0.346847	0.0256285
A7	25	SPX7	0.379869	0.0588977
A7	26	SPX7	0.4238	0.103076
A7	27	SPX7	0.509337	0.188859
A7	28	SPX7	0.649507	0.329276
A7	29	SPX7	0.852355	0.532371
A7	30	SPX7	1.10106	0.781319
A7	31	SPX7	1.35091	1.03142
A7	32	SPX7	1.56814	1.2489
A7	33	SPX7	1.73259	1.4136
A7	34	SPX7	1.90401	1.58526
A7	35	SPX7	2.03777	1.71927
A7	36	SPX7	2.14474	1.82648
A7	37	SPX7	2.23306	1.91505
A7	38	SPX7	2.29814	1.98038
A7	39	SPX7	2.35054	2.03302
A7	40	SPX7	2.39608	2.07881
A8	1	SPX7	0.504123	-0.00228789
A8	2	SPX7	0.506543	0.000214614
A8	3	SPX7	0.505912	-0.00033399
A8	4	SPX7	0.507487	0.00132337
A8	5	SPX7	0.507882	0.00180069
A8	6	SPX7	0.507262	0.00126329
A8	7	SPX7	0.507308	0.0013915
A8	8	SPX7	0.50546	-0.000373758
A8	9	SPX7	0.507463	0.00171163
A8	10	SPX7	0.506226	0.000556607
A8	11	SPX7	0.504325	-0.00126193
A8	12	SPX7	0.506118	0.000613584
A8	13	SPX7	0.504943	-0.000478733
A8	14	SPX7	0.502814	-0.00252556
A8	15	SPX7	0.502432	-0.00282543
A8	16	SPX7	0.502471	-0.00270336
A8	17	SPX7	0.50157	-0.00352227
A8	18	SPX7	0.50269	-0.00231999
A8	19	SPX7	0.503754	-0.00117308
A8	20	SPX7	0.502442	-0.00240255
A8	21	SPX7	0.503303	-0.00145931
A8	22	SPX7	0.509462	0.00478153
A8	23	SPX7	0.512535	0.00793778
A8	24	SPX7	0.521514	0.0169985
A8	25	SPX7	0.5464	0.0419676
A8	26	SPX7	0.58141	0.0770594
A8	27	SPX7	0.655055	0.150787
A8	28	SPX7	0.771599	0.267414
A8	29	SPX7	0.943374	0.439271
A8	30	SPX7	1.18695	0.682927
A8	31	SPX7	1.47075	0.96681
A8	32	SPX7	1.72894	1.22508
A8	33	SPX7	1.92867	1.4249
A8	34	SPX7	2.09862	1.59493
A8	35	SPX7	2.23023	1.72663
A8	36	SPX7	2.32763	1.8241
A8	37	SPX7	2.41692	1.91348
A8	38	SPX7	2.47988	1.97652
A8	39	SPX7	2.52605	2.02277
A8	40	SPX7	2.57085	2.06766
A9	1	SPX7	0.355026	-0.00368815
A9	2	SPX7	0.358026	-0.000781116
A9	3	SPX7	0.357837	-0.00106356
A9	4	SPX7	0.361497	0.00250345
A9	5	SPX7	0.360525	0.0014381
A9	6	SPX7	0.357162	-0.0020188
A9	7	SPX7	0.359504	0.000230166
A9	8	SPX7	0.360085	0.000717994
A9	9	SPX7	0.358174	-0.00128637
A9	10	SPX7	0.360952	0.0013987
A9	11	SPX7	0.359863	0.000216492
A9	12	SPX7	0.36102	0.00128076
A9	13	SPX7	0.360669	0.000835802
A9	14	SPX7	0.35704	-0.00288553
A9	15	SPX7	0.36081	0.000791145
A9	16	SPX7	0.358248	-0.00186434
A9	17	SPX7	0.358842	-0.00136378
A9	18	SPX7	0.3573	-0.00299821
A9	19	SPX7	0.357342	-0.00305007
A9	20	SPX7	0.36015	-0.000335294
A9	21	SPX7	0.364665	0.00408641
A9	22	SPX7	0.364038	0.00336695
A9	23	SPX7	0.371655	0.0108904
A9	24	SPX7	0.384924	0.0240659
A9	25	SPX7	0.407632	0.0466806
A9	26	SPX7	0.443465	0.0824212
A9	27	SPX7	0.517006	0.155869
A9	28	SPX7	0.642792	0.281561
A9	29	SPX7	0.824145	0.462821
A9	30	SPX7	1.08021	0.718797
A9	31	SPX7	1.38425	1.02274
A9	32	SPX7	1.65654	1.29494
A9	33	SPX7	1.86552	1.50383
A9	34	SPX7	2.04621	1.68442
A9	35	SPX7	2.18531	1.82342
A9	36	SPX7	2.28834	1.92636
A9	37	SPX7	2.38326	2.02119
A9	38	SPX7	2.44796	2.0858
A9	39	SPX7	2.4954	2.13315
A9	40	SPX7	2.54538	2.18304
A10	1	SPX8	0.252031	-0.00760244
A10	2	SPX8	0.254148	-0.0055831
A10	3	SPX8	0.255014	-0.00481379
A10	4	SPX8	0.259187	-0.000737851
A10	5	SPX8	0.25529	-0.00473113
A10	6	SPX8	0.259212	-0.000906779
A10	7	SPX8	0.261392	0.00117673
A10	8	SPX8	0.262297	0.00198496
A10	9	SPX8	0.263768	0.00335855
A10	10	SPX8	0.259572	-0.000934365
A10	11	SPX8	0.261626	0.00102272
A10	12	SPX8	0.26058	-0.000119668
A10	13	SPX8	0.261033	0.00023575
A10	14	SPX8	0.262429	0.00153483
A10	15	SPX8	0.261677	0.000685786
A10	16	SPX8	0.261584	0.000496477
A10	17	SPX8	0.262766	0.00158151
A10	18	SPX8	0.260541	-0.000740985
A10	19	SPX8	0.261033	-0.000345602
A10	20	SPX8	0.263137	0.00166131
A10	21	SPX8	0.263443	0.0018707
A10	22	SPX8	0.26174	7.03651e-05
A10	23	SPX8	0.261467	-0.000300082
A10	24	SPX8	0.261674	-0.000189073
A10	25	SPX8	0.263751	0.0017903
A10	26	SPX8	0.260157	-0.00190018
A10	27	SPX8	0.263299	0.00114504
A10	28	SPX8	0.26416	0.00190854
A10	29	SPX8	0.263563	0.00121421
A10	30	SPX8	0.263108	0.000662739
A10	31	SPX8	0.261738	-0.000804076
A10	32	SPX8	0.265032	0.00239258
A10	33	SPX8	0.261689	-0.00104739
A10	34	SPX8	0.262525	-0.000308001
A10	35	SPX8	0.262682	-0.000247864
A10	36	SPX8	0.262434	-0.000593159
A10	37	SPX8	0.260835	-0.00228895
A10	38	SPX8	0.26303	-0.000190837
A10	39	SPX8	0.259725	-0.00359331
A10	40	SPX8	0.260129	-0.00328534
A11	1	SPX8	0.217434	-0.0075974
A11	2	SPX8	0.220932	-0.00398904
A11	3	SPX8	0.222931	-0.00187999
A11	4	SPX8	0.22215	-0.0025516
A11	5	SPX8	0.224946	0.000354833
A11	6	SPX8	0.223201	-0.00127991
A11	7	SPX8	0.223828	-0.000542767
A11	8	SPX8	0.226355	0.00209358
A11	9	SPX8	0.228962	0.00481066
A11	10	SPX8	0.224027	-1.35871e-05
A11	11	SPX8	0.223206	-0.000724409
A11	12	SPX8	0.224766	0.000944932
A11	13	SPX8	0.223329	-0.000381368
A11	14	SPX8	0.223608	7.29248e-06
A11	15	SPX8	0.223219	-0.000271545
A11	16	SPX8	0.223487	0.000106402
A11	17	SPX8	0.222418	-0.000852301
A11	18	SPX8	0.223189	2.86489e-05
A11	19	SPX8	0.22386	0.000809821
A11	20	SPX8	0.222457	-0.000483324
A11	21	SPX8	0.223739	0.000909138
A11	22	SPX8	0.224831	0.0021111
A11	23	SPX8	0.221106	-0.00150412
A11	24	SPX8	0.222108	-0.000391664
A11	25	SPX8	0.221072	-0.0013173
A11	26	SPX8	0.223794	0.00151436
A11	27	SPX8	0.222724	0.000555017
A11	28	SPX8	0.223171	0.00111143
A11	29	SPX8	0.221781	-0.000167971
A11	30	SPX8	0.220168	-0.00167134
A11	31	SPX8	0.221198	-0.000531528
A11	32	SPX8	0.222658	0.00103885
A11	33	SPX8	0.220425	-0.00108424
A11	34	SPX8	0.221608	0.000208756
A11	35	SPX8	0.219881	-0.00140764
A11	36	SPX8	0.221572	0.000393264
A11	37	SPX8	0.21971	-0.00135858
A11	38	SPX8	0.220256	-0.000702253
A11	39	SPX8	0.222968	0.00211933
A11	40	SPX8	0.218904	-0.00183461
A12	1	SPX8	0.260833	-0.00871526
A12	2	SPX8	0.266784	-0.00266703
A12	3	SPX8	0.266769	-0.00258499
A12	4	SPX8	0.264684	-0.00457251
A12	5	SPX8	0.269212	5.257e-05
A12	6	SPX8	0.269398	0.0003356
A12	7	SPX8	0.268673	-0.000292219
A12	8	SPX8	0.266799	-0.00206936
A12	9	SPX8	0.271259	0.00248785
A12	10	SPX8	0.269039	0.000365152
A12	11	SPX8	0.269111	0.000533591
A12	12	SPX8	0.271135	0.00265539
A12	13	SPX8	0.270381	0.00199831
A12	14	SPX8	0.26807	-0.000215767
A12	15	SPX8	0.270723	0.00253394
A12	16	SPX8	0.270769	0.0026777
A12	17	SPX8	0.271852	0.00385752
A12	18	SPX8	0.269262	0.00136458
A12	19	SPX8	0.267578	-0.000222011
A12	20	SPX8	0.266701	-0.00100176
A12	21	SPX8	0.266799	-0.000806709
A12	22	SPX8	0.265622	-0.0018872
A12	23	SPX8	0.266987	-0.000425126
A12	24	SPX8	0.266473	-0.000841795
A12	25	SPX8	0.266426	-0.000791522
A12	26	SPX8	0.266914	-0.000206565
A12	27	SPX8	0.269613	0.00259014
A12	28	SPX8	0.264721	-0.00220541
A12	29	SPX8	0.267451	0.000621812
A12	30	SPX8	0.261386	-0.00534611
A12	31	SPX8	0.261741	-0.00489347
A12	32	SPX8	0.269962	0.003424
A12	33	SPX8	0.265036	-0.00140479
A12	34	SPX8	0.270612	0.00426915
A12	35	SPX8	0.27775	0.0115038
A12	36	SPX8	0.290653	0.0245036
A12	37	SPX8	0.313162	0.0471102
A12	38	SPX8	0.361011	0.0950566
A12	39	SPX8	0.437719	0.171861
A12	40	SPX8	0.565515	0.299754
B1	1	SPX5	0.260495	4.80299e-05
B1	2	SPX5	0.25811	-0.00278235
B1	3	SPX5	0.25956	-0.00177766
B1	4	SPX5	0.262486	0.000702465
B1	5	SPX5	0.267365	0.00513494
B1	6	SPX5	0.264581	0.0019061
B1	7	SPX5	0.25996	-0.00316077
B1	8	SPX5	0.264534	0.00096682
B1	9	SPX5	0.261623	-0.00238913
B1	10	SPX5	0.266181	0.00172276
B1	11	SPX5	0.265906	0.00100214
B1	12	SPX5	0.268304	0.00295464
B1	13	SPX5	0.260879	-0.00491692
B1	14	SPX5	0.262172	-0.00406958
B1	15	SPX5	0.265415	-0.00127254
B1	16	SPX5	0.268871	0.00173791
B1	17	SPX5	0.263804	-0.00377459
B1	18	SPX5	0.266294	-0.00173009
B1	19	SPX5	0.269298	0.000828023
B1	20	SPX5	0.26841	-0.000505629
B1	21	SPX5	0.276003	0.00664112
B1	22	SPX5	0.281421	0.0116138
B1	23	SPX5	0.295946	0.0256928
B1	24	SPX5	0.325095	0.0543962
B1	25	SPX5	0.376914	0.10577
B1	26	SPX5	0.475524	0.203934
B1	27	SPX5	0.644448	0.372411
B1	28	SPX5	0.903502	0.631021
B1	29	SPX5	1.23847	0.965546
B1	30	SPX5	1.53944	1.26606
B1	31	SPX5	1.75129	1.47747
B1	32	SPX5	1.91633	1.64207
B1	33	SPX5	2.04465	1.76994
B1	34	SPX5	2.14652	1.87137
B1	35	SPX5	2.22106	1.94546
B1	36	SPX5	2.28329	2.00725
B1	37	SPX5	2.33948	2.06299
B1	38	SPX5	2.36678	2.08984
B1	39	SPX5	2.3972	2.11982
B1	40	SPX5	2.42494	2.1471
B2	1	SPX5	0.322218	-0.00083753
B2	2	SPX5	0.324251	0.000725127
B2	3	SPX5	0.323045	-0.000951936
B2	4	SPX5	0.325525	0.00105761
B2	5	SPX5	0.326816	0.00187831
B2	6	SPX5	0.328918	0.00351022
B2	7	SPX5	0.328088	0.00220941
B2	8	SPX5	0.328108	0.00175925
B2	9	SPX5	0.326227	-0.000593131
B2	10	SPX5	0.324907	-0.00238326
B2	11	SPX5	0.326399	-0.001362
B2	12	SPX5	0.32487	-0.00336161
B2	13	SPX5	0.326932	-0.00176945
B2	14	SPX5	0.325691	-0.00348111
B2	15	SPX5	0.328547	-0.00109513
B2	16	SPX5	0.329722	-0.000391112
B2	17	SPX5	0.326678	-0.00390534
B2	18	SPX5	0.331492	0.000438143
B2	19	SPX5	0.331525	1.10844e-07
B2	20	SPX5	0.333207	0.00121152
B2	21	SPX5	0.339695	0.0072295
B2	22	SPX5	0.348329	0.015393
B2	23	SPX5	0.367099	0.0336925
B2	24	SPX5	0.40062	0.0667434
B2	25	SPX5	0.475902	0.141555
B2	26	SPX5	0.595439	0.260621
B2	27	SPX5	0.809776	0.474487
B2	28	SPX5	1.1261	0.790339
B2	29	SPX5	1.49809	1.16186
B2	30	SPX5	1.83355	1.49685
B2	31	SPX5	2.0498	1.71263
B2	32	SPX5	2.19196	1.85431
B2	33	SPX5	2.3051	1.96698
B2	34	SPX5	2.41141	2.07283
B2	35	SPX5	2.49017	2.15112
B2	36	SPX5	2.54861	2.20909
B2	37	SPX5	2.60386	2.26386
B2	38	SPX5	2.62778	2.28732
B2	39	SPX5	2.65602	2.31508
B2	40	SPX5	2.67499	2.33358
B3	1	SPX5	0.244132	-0.00503682
B3	2	SPX5	0.246652	-0.00289088
B3	3	SPX5	0.248734	-0.00118341
B3	4	SPX5	0.251519	0.00122735
B3	5	SPX5	0.252368	0.00170214
B3	6	SPX5	0.251219	0.000178954
B3	7	SPX5	0.25344	0.00202596
B3	8	SPX5	0.249069	-0.00271963
B3	9	SPX5	0.249495	-0.00266764
B3	10	SPX5	0.254302	0.00176551
B3	11	SPX5	0.252481	-0.000430225
B3	12	SPX5	0.252963	-0.000321975
B3	13	SPX5	0.254098	0.000439005
B3	14	SPX5	0.255073	0.00103959
B3	15	SPX5	0.253951	-0.000456986
B3	16	SPX5	0.25403	-0.000751246
B3	17	SPX5	0.256097	0.000941265
B3	18	SPX5	0.251951	-0.00357905
B3	19	SPX5	0.253096	-0.00280877
B3	20	SPX5	0.261878	0.00559915
B3	21	SPX5	0.26601	0.009357
B3	22	SPX5	0.280689	0.0236623
B3	23	SPX5	0.2997	0.0422992
B3	24	SPX5	0.337487	0.0797121
B3	25	SPX5	0.416667	0.158517
B3	26	SPX5	0.553602	0.295079
B3	27	SPX5	0.785626	0.526728
B3	28	SPX5	1.12594	0.866671
B3	29	SPX5	1.50611	1.24646
B3	30	SPX5	1.81263	1.55261
B3	31	SPX5	2.006	1.74561
B3	32	SPX5	2.14989	1.88913
B3	33	SPX5	2.26525	2.00411
B3	34	SPX5	2.361	2.09949
B3	35	SPX5	2.43419	2.1723
B3	36	SPX5	2.48706	2.22479
B3	37	SPX5	2.52598	2.26334
B3	38	SPX5	2.5596	2.29659
B3	39	SPX5	2.58972	2.32633
B3	40	SPX5	2.60838	2.34461
B4	1	SPX6	0.246673	-0.0103958
B4	2	SPX6	0.252835	-0.00427373
B4	3	SPX6	0.257307	0.000157535
B4	4	SPX6	0.255535	-0.00165499
B4	5	SPX6	0.258319	0.00108839
B4	6	SPX6	0.25736	8.85138e-05
B4	7	SPX6	0.260102	0.00279047
B4	8	SPX6	0.255674	-0.00167875
B4	9	SPX6	0.256621	-0.000772415
B4	10	SPX6	0.259557	0.00212368
B4	11	SPX6	0.258078	0.000603538
B4	12	SPX6	0.258769	0.00125447
B4	13	SPX6	0.259442	0.00188669
B4	14	SPX6	0.254337	-0.00325869
B4	15	SPX6	0.258251	0.000614765
B4	16	SPX6	0.257187	-0.000489302
B4	17	SPX6	0.256305	-0.00141214
B4	18	SPX6	0.259218	0.00145996
B4	19	SPX6	0.254441	-0.00335724
B4	20	SPX6	0.256083	-0.00175612
B4	21	SPX6	0.258108	0.000228557
B4	22	SPX6	0.256542	-0.00137801
B4	23	SPX6	0.256801	-0.00115986
B4	24	SPX6	0.257306	-0.000694897
B4	25	SPX6	0.2577	-0.000341391
B4	26	SPX6	0.25899	0.000907405
B4	27	SPX6	0.262873	0.00474984
B4	28	SPX6	0.268861	0.0106974
B4	29	SPX6	0.282976	0.0247722
B4	30	SPX6	0.300931	0.0426868
B4	31	SPX6	0.343252	0.0849668
B4	32	SPX6	0.416327	0.158001
B4	33	SPX6	0.523204	0.264838
B4	34	SPX6	0.677232	0.418825
B4	35	SPX6	0.835154	0.576707
B4	36	SPX6	0.961073	0.702586
B4	37	SPX6	1.10207	0.843545
B4	38	SPX6	1.23572	0.977155
B4	39	SPX6	1.3538	1.09519
B4	40	SPX6	1.47838	1.21973
B5	1	SPX6	0.23258	-0.00244176
B5	2	SPX6	0.237085	0.00167215
B5	3	SPX6	0.237539	0.00173467
B5	4	SPX6	0.239219	0.00302393
B5	5	SPX6	0.238538	0.00195247
B5	6	SPX6	0.236554	-0.000422368
B5	7	SPX6	0.237724	0.000356182
B5	8	SPX6	0.238966	0.00120736
B5	9	SPX6	0.238362	0.000212224
B5	10	SPX6	0.23786	-0.000681033
B5	11	SPX6	0.240022	0.00108998
B5	12	SPX6	0.23734	-0.00198302
B5	13	SPX6	0.239547	-0.000166559
B5	14	SPX6	0.237825	-0.00227901
B5	15	SPX6	0.240365	-0.000130749
B5	16	SPX6	0.239393	-0.00149371
B5	17	SPX6	0.241593	0.000315438
B5	18	SPX6	0.242508	0.000839804
B5	19	SPX6	0.237854	-0.00420551
B5	20	SPX6	0.239664	-0.00278624
B5	21	SPX6	0.237852	-0.00498921
B5	22	SPX6	0.241356	-0.00187587
B5	23	SPX6	0.241576	-0.00204673
B5	24	SPX6	0.243134	-0.000879843
B5	25	SPX6	0.242718	-0.00168655
B5	26	SPX6	0.245042	0.000245763
B5	27	SPX6	0.250231	0.00504371
B5	28	SPX6	0.255183	0.00960489
B5	29	SPX6	0.26041	0.0144417
B5	30	SPX6	0.285703	0.0393435
B5	31	SPX6	0.320223	0.0734719
B5	32	SPX6	0.387712	0.140571
B5	33	SPX6	0.491298	0.243765
B5	34	SPX6	0.637061	0.389138
B5	35	SPX6	0.802135	0.55382
B5	36	SPX6	0.938623	0.689918
B5	37	SPX6	1.08359	0.834491
B5	38	SPX6	1.20741	0.957924
B5	39	SPX6	1.3277	1.07783
B5	40	SPX6	1.44256	1.19229
B6	1	SPX6	0.209615	-0.00421399
B6	2	SPX6	0.212568	-0.00149919
B6	3	SPX6	0.216009	0.00170299
B6	4	SPX6	0.214815	0.000271409
B6	5	SPX6	0.215225	0.000442422
B6	6	SPX6	0.213312	-0.00170851
B6	7	SPX6	0.215575	0.000316416
B6	8	SPX6	0.217344	0.00184704
B6	9	SPX6	0.218565	0.00282899
B6	10	SPX6	0.21685	0.000875946
B6	11	SPX6	0.216773	0.000560599
B6	12	SPX6	0.215771	-0.000679736
B6	13	SPX6	0.216714	2.50357e-05
B6	14	SPX6	0.216922	-4.89388e-06
B6	15	SPX6	0.215851	-0.00131462
B6	16	SPX6	0.215293	-0.00211113
B6	17	SPX6	0.216829	-0.000813529
B6	18	SPX6	0.218974	0.00109338
B6	19	SPX6	0.21466	-0.0034585
B6	20	SPX6	0.216663	-0.00169409
B6	21	SPX6	0.217052	-0.0015437
B6	22	SPX6	0.216689	-0.00214508
B6	23	SPX6	0.216089	-0.00298317
B6	24	SPX6	0.216445	-0.00286515
B6	25	SPX6	0.218419	-0.00112947
B6	26	SPX6	0.220714	0.000926809
B6	27	SPX6	0.222989	0.00296379
B6	28	SPX6	0.22886	0.00859676
B6	29	SPX6	0.238388	0.0178859
B6	30	SPX6	0.256607	0.0358667
B6	31	SPX6	0.293269	0.0722909
B6	32	SPX6	0.352998	0.131782
B6	33	SPX6	0.444512	0.223057
B6	34	SPX6	0.570021	0.348327
B6	35	SPX6	0.698661	0.47673
B6	36	SPX6	0.805165	0.582995
B6	37	SPX6	0.931958	0.70955
B6	38	SPX6	1.05967	0.83702
B6	39	SPX6	1.17041	0.947526
B6	40	SPX6	1.29082	1.0677
B7	1	SPX7	0.245118	-0.00606861
B7	2	SPX7	0.251408	0.000169422
B7	3	SPX7	0.252351	0.00105919
B7	4	SPX7	0.251341	-3.16314e-06
B7	5	SPX7	0.249783	-0.00161365
B7	6	SPX7	0.251719	0.000270303
B7	7	SPX7	0.252934	0.00143243
B7	8	SPX7	0.252795	0.00124111
B7	9	SPX7	0.251818	0.000211488
B7	10	SPX7	0.251719	6.04046e-05
B7	11	SPX7	0.251489	-0.000222107
B7	12	SPX7	0.250804	-0.000959878
B7	13	SPX7	0.25223	0.000413994
B7	14	SPX7	0.249713	-0.00215547
B7	15	SPX7	0.25495	0.00302885
B7	16	SPX7	0.24986	-0.00211363
B7	17	SPX7	0.253033	0.00100631
B7	18	SPX7	0.247523	-0.00455548
B7	19	SPX7	0.250116	-0.00201525
B7	20	SPX7	0.251454	-0.000730222
B7	21	SPX7	0.253521	0.00128503
B7	22	SPX7	0.253803	0.00151434
B7	23	SPX7	0.255187	0.00284542
B7	24	SPX7	0.262486	0.0100926
B7	25	SPX7	0.278001	0.0255549
B7	26	SPX7	0.303052	0.050553
B7	27	SPX7	0.348609	0.0960572
B7	28	SPX7	0.429833	0.177229
B7	29	SPX7	0.56377	0.311114
B7	30	SPX7	0.758782	0.506074
B7	31	SPX7	1.00212	0.749356
B7	32	SPX7	1.2466	0.993789
B7	33	SPX7	1.45047	1.1976
B7	34	SPX7	1.64577	1.39285
B7	35	SPX7	1.81631	1.56333
B7	36	SPX7	1.95469	1.70166
B7	37	SPX7	2.07832	1.82525
B7	38	SPX7	2.17035	1.91722
B7	39	SPX7	2.25006	1.99688
B7	40	SPX7	2.31009	2.05686
B8	1	SPX7	0.29936	-0.0058017
B8	2	SPX7	0.307376	0.00235384
B8	3	SPX7	0.30341	-0.00147211
B8	4	SPX7	0.308742	0.0039989
B8	5	SPX7	0.304249	-0.000354731
B8	6	SPX7	0.306096	0.00163218
B8	7	SPX7	0.302869	-0.00145473
B8	8	SPX7	0.303148	-0.00103656
B8	9	SPX7	0.305035	0.000989831
B8	10	SPX7	0.303156	-0.000748941
B8	11	SPX7	0.304385	0.000619596
B8	12	SPX7	0.304566	0.000939986
B8	13	SPX7	0.30425	0.000763869
B8	14	SPX7	0.300401	-0.0029457
B8	15	SPX7	0.300403	-0.00280418
B8	16	SPX7	0.30189	-0.00117741
B8	17	SPX7	0.303398	0.000470108
B8	18	SPX7	0.301507	-0.00128127
B8	19	SPX7	0.3016	-0.00104868
B8	20	SPX7	0.302357	-0.000151763
B8	21	SPX7	0.304121	0.00175116
B8	22	SPX7	0.30554	0.00331046
B8	23	SPX7	0.305113	0.00302235
B8	24	SPX7	0.315649	0.0136987
B8	25	SPX7	0.33188	0.0300685
B8	26	SPX7	0.354946	0.0532742
B8	27	SPX7	0.404235	0.102703
B8	28	SPX7	0.49555	0.194157
B8	29	SPX7	0.633332	0.332079
B8	30	SPX7	0.840209	0.539096
B8	31	SPX7	1.09997	0.798998
B8	32	SPX7	1.35139	1.05056
B8	33	SPX7	1.55021	1.24952
B8	34	SPX7	1.76109	1.46054
B8	35	SPX7	1.91976	1.61934
B8	36	SPX7	2.05256	1.75228
B8	37	SPX7	2.17194	1.8718
B8	38	SPX7	2.26226	1.96226
B8	39	SPX7	2.33376	2.0339
B8	40	SPX7	2.38782	2.0881
B9	1	SPX7	0.305891	-0.00612171
B9	2	SPX7	0.309027	-0.0033534
B9	3	SPX7	0.313372	0.000624821
B9	4	SPX7	0.314061	0.000947192
B9	5	SPX7	0.313152	-0.000328347
B9	6	SPX7	0.314603	0.00075607
B9	7	SPX7	0.315516	0.00130196
B9	8	SPX7	0.316578	0.00199749
B9	9	SPX7	0.314113	-0.000834599
B9	10	SPX7	0.314718	-0.000596419
B9	11	SPX7	0.316792	0.00111093
B9	12	SPX7	0.313509	-0.00253881
B9	13	SPX7	0.315544	-0.000869676
B9	14	SPX7	0.317327	0.000546054
B9	15	SPX7	0.316096	-0.00105195
B9	16	SPX7	0.317302	-0.000212594
B9	17	SPX7	0.317637	-0.000243707
B9	18	SPX7	0.314764	-0.00348402
B9	19	SPX7	0.313653	-0.00496201
B9	20	SPX7	0.317363	-0.00161795
B9	21	SPX7	0.319239	-0.000109567
B9	22	SPX7	0.323008	0.00329341
B9	23	SPX7	0.326353	0.00627174
B9	24	SPX7	0.335151	0.0147023
B9	25	SPX7	0.347314	0.0264984
B9	26	SPX7	0.36902	0.0478386
B9	27	SPX7	0.413811	0.0922621
B9	28	SPX7	0.496931	0.175015
B9	29	SPX7	0.631194	0.308912
B9	30	SPX7	0.830872	0.508223
B9	31	SPX7	1.1124	0.789386
B9	32	SPX7	1.41198	1.0886
B9	33	SPX7	1.67067	1.34692
B9	34	SPX7	1.88626	1.56214
B9	35	SPX7	2.0445	1.72002
B9	36	SPX7	2.16817	1.84332
B9	37	SPX7	2.27378	1.94857
B9	38	SPX7	2.34641	2.02083
B9	39	SPX7	2.41677	2.09082
B9	40	SPX7	2.47122	2.1449
B10	1	SPX8	0.31128	-0.00675863
B10	2	SPX8	0.31188	-0.0062859
B10	3	SPX8	0.313983	-0.00431011
B10	4	SPX8	0.31731	-0.00111008
B10	5	SPX8	0.315374	-0.00317316
B10	6	SPX8	0.319231	0.000556251
B10	7	SPX8	0.32103	0.00222787
B10	8	SPX8	0.319397	0.000467461
B10	9	SPX8	0.319457	0.000400774
B10	10	SPX8	0.320785	0.00160098
B10	11	SPX8	0.321616	0.00230484
B10	12	SPX8	0.320347	0.00090825
B10	13	SPX8	0.321389	0.00182346
B10	14	SPX8	0.31834	-0.0013528
B10	15	SPX8	0.320042	0.000221428
B10	16	SPX8	0.319793	-0.000155203
B10	17	SPX8	0.320321	0.000246155
B10	18	SPX8	0.32027	6.72328e-05
B10	19	SPX8	0.322049	0.00171919
B10	20	SPX8	0.322493	0.00203606
B10	21	SPX8	0.320582	-2.6516e-06
B10	22	SPX8	0.321536	0.000824373
B10	23	SPX8	0.32013	-0.000709005
B10	24	SPX8	0.319161	-0.00180533
B10	25	SPX8	0.320432	-0.000661747
B10	26	SPX8	0.321657	0.000435883
B10	27	SPX8	0.32086	-0.000488098
B10	28	SPX8	0.319481	-0.00199462
B10	29	SPX8	0.322239	0.000636484
B10	30	SPX8	0.321635	-9.49731e-05
B10	31	SPX8	0.320701	-0.0011561
B10	32	SPX8	0.323233	0.00124883
B10	33	SPX8	0.322698	0.000586459
B10	34	SPX8	0.32249	0.000250478
B10	35	SPX8	0.324919	0.00255272
B10	36	SPX8	0.320748	-0.00174551
B10	37	SPX8	0.320794	-0.00182728
B10	38	SPX8	0.322532	-0.000216362
B10	39	SPX8	0.322564	-0.000312137
B10	40	SPX8	0.322914	-8.92939e-05
B11	1	SPX8	0.290381	-0.00974519
B11	2	SPX8	0.297551	-0.00221299
B11	3	SPX8	0.299278	-0.000125291
B11	4	SPX8	0.297677	-0.0013641
B11	5	SPX8	0.299893	0.00121325
B11	6	SPX8	0.298359	4.07568e-05
B11	7	SPX8	0.297347	-0.000610557
B11	8	SPX8	0.298558	0.000962098
B11	9	SPX8	0.298231	0.000996864
B11	10	SPX8	0.295751	-0.00112233
B11	11	SPX8	0.297497	0.000985631
B11	12	SPX8	0.292132	-0.00401789
B11	13	SPX8	0.296523	0.000734072
B11	14	SPX8	0.29675	0.00132215
B11	15	SPX8	0.295099	3.23792e-05
B11	16	SPX8	0.294468	-0.000237226
B11	17	SPX8	0.295546	0.00120242
B11	18	SPX8	0.292566	-0.00141591
B11	19	SPX8	0.292104	-0.00151629
B11	20	SPX8	0.294494	0.00123519
B11	21	SPX8	0.29492	0.0020222
B11	22	SPX8	0.294043	0.00150655
B11	23	SPX8	0.293134	0.000959212
B11	24	SPX8	0.292915	0.00110168
B11	25	SPX8	0.291668	0.000215855
B11	26	SPX8	0.290146	-0.000944482
B11	27	SPX8	0.291163	0.000433832
B11	28	SPX8	0.288707	-0.00166045
B11	29	SPX8	0.287995	-0.00201118
B11	30	SPX8	0.290542	0.000897039
B11	31	SPX8	0.287201	-0.00208309
B11	32	SPX8	0.287651	-0.00127164
B11	33	SPX8	0.288694	0.000133135
B11	34	SPX8	0.289501	0.00130152
B11	35	SPX8	0.28882	0.000981997
B11	36	SPX8	0.28825	0.000773456
B11	37	SPX8	0.28568	-0.0014353
B11	38	SPX8	0.287682	0.000927984
B11	39	SPX8	0.286229	-0.00016354
B11	40	SPX8	0.286528	0.000496658
B12	1	SPX8	0.305601	-0.00547079
B12	2	SPX8	0.310814	-0.000412987
B12	3	SPX8	0.31002	-0.00136223
B12	4	SPX8	0.313688	0.00215018
B12	5	SPX8	0.311466	-0.000227518
B12	6	SPX8	0.311583	-0.000265165
B12	7	SPX8	0.311821	-0.000183216
B12	8	SPX8	0.314945	0.0027861
B12	9	SPX8	0.312771	0.000456358
B12	10	SPX8	0.313693	0.00122349
B12	11	SPX8	0.313227	0.000601929
B12	12	SPX8	0.311247	-0.00153356
B12	13	SPX8	0.312332	-0.000603977
B12	14	SPX8	0.313275	0.00018393
B12	15	SPX8	0.310039	-0.00320758
B12	16	SPX8	0.313688	0.0002859
B12	17	SPX8	0.310736	-0.00282073
B12	18	SPX8	0.314146	0.000433438
B12	19	SPX8	0.314545	0.000677333
B12	20	SPX8	0.313359	-0.000663779
B12	21	SPX8	0.315054	0.000876071
B12	22	SPX8	0.312806	-0.00152726
B12	23	SPX8	0.315817	0.00132813
B12	24	SPX8	0.315047	0.000402849
B12	25	SPX8	0.315867	0.00106728
B12	26	SPX8	0.312088	-0.0028663
B12	27	SPX8	0.316379	0.00126865
B12	28	SPX8	0.314526	-0.000739532
B12	29	SPX8	0.314377	-0.00104397
B12	30	SPX8	0.317185	0.0016095
B12	31	SPX8	0.314636	-0.00109515
B12	32	SPX8	0.318196	0.00230958
B12	33	SPX8	0.316453	0.000411131
B12	34	SPX8	0.315973	-0.000223725
B12	35	SPX8	0.317633	0.00128033
B12	36	SPX8	0.315752	-0.000756127
B12	37	SPX8	0.317447	0.000783543
B12	38	SPX8	0.316405	-0.000413146
B12	39	SPX8	0.316371	-0.000602756
B12	40	SPX8	0.319299	0.00216963
C1	1	SPX5	0.28198	-0.00844144
C1	2	SPX5	0.286565	-0.00408582
C1	3	SPX5	0.291417	0.00053669
C1	4	SPX5	0.292362	0.00125202
C1	5	SPX5	0.290368	-0.000972315
C1	6	SPX5	0.291613	4.36334e-05
C1	7	SPX5	0.292247	0.000448009
C1	8	SPX5	0.294768	0.00273881
C1	9	SPX5	0.292422	0.000163819
C1	10	SPX5	0.292564	7.6367e-05
C1	11	SPX5	0.290498	-0.00221947
C1	12	SPX5	0.2937	0.000753094
C1	13	SPX5	0.291281	-0.00189623
C1	14	SPX5	0.293691	0.000284815
C1	15	SPX5	0.292702	-0.000933814
C1	16	SPX5	0.291267	-0.00259921
C1	17	SPX5	0.293436	-0.000659925
C1	18	SPX5	0.290474	-0.00385093
C1	19	SPX5	0.293471	-0.00108398
C1	20	SPX5	0.297612	0.00282751
C1	21	SPX5	0.300105	0.0050911
C1	22	SPX5	0.308521	0.013277
C1	23	SPX5	0.321945	0.0264712
C1	24	SPX5	0.350366	0.0546631
C1	25	SPX5	0.401365	0.105432
C1	26	SPX5	0.495263	0.199101
C1	27	SPX5	0.667543	0.371151
C1	28	SPX5	0.927196	0.630575
C1	29	SPX5	1.2706	0.973746
C1	30	SPX5	1.59148	1.2944
C1	31	SPX5	1.82207	1.52476
C1	32	SPX5	1.97993	1.68239
C1	33	SPX5	2.11339	1.81562
C1	34	SPX5	2.22357	1.92557
C1	35	SPX5	2.3107	2.01247
C1	36	SPX5	2.37304	2.07458
C1	37	SPX5	2.42262	2.12394
C1	38	SPX5	2.46086	2.16194
C1	39	SPX5	2.49219	2.19304
C1	40	SPX5	2.5186	2.21922
C2	1	SPX5	0.241647	-0.0100546
C2	2	SPX5	0.247415	-0.00429553
C2	3	SPX5	0.251598	-0.000120452
C2	4	SPX5	0.247943	-0.00378407
C2	5	SPX5	0.25572	0.00398364
C2	6	SPX5	0.251802	5.7566e-05
C2	7	SPX5	0.251912	0.000158648
C2	8	SPX5	0.251234	-0.000527438
C2	9	SPX5	0.255242	0.00347209
C2	10	SPX5	0.255688	0.00390877
C2	11	SPX5	0.248399	-0.00338881
C2	12	SPX5	0.250758	-0.00103846
C2	13	SPX5	0.250266	-0.00153873
C2	14	SPX5	0.250081	-0.00173224
C2	15	SPX5	0.252252	0.000429764
C2	16	SPX5	0.251818	-1.24501e-05
C2	17	SPX5	0.249554	-0.00228499
C2	18	SPX5	0.251521	-0.000327206
C2	19	SPX5	0.249547	-0.00230956
C2	20	SPX5	0.253629	0.00176374
C2	21	SPX5	0.255164	0.00329018
C2	22	SPX5	0.264955	0.0130726
C2	23	SPX5	0.283253	0.0313621
C2	24	SPX5	0.306246	0.0543459
C2	25	SPX5	0.359594	0.107686
C2	26	SPX5	0.455667	0.203751
C2	27	SPX5	0.620197	0.368271
C2	28	SPX5	0.885267	0.633333
C2	29	SPX5	1.21254	0.960593
C2	30	SPX5	1.52014	1.26819
C2	31	SPX5	1.73482	1.48286
C2	32	SPX5	1.90196	1.64999
C2	33	SPX5	2.03099	1.77901
C2	34	SPX5	2.13596	1.88397
C2	35	SPX5	2.21431	1.96231
C2	36	SPX5	2.27683	2.02482
C2	37	SPX5	2.33233	2.08032
C2	38	SPX5	2.37319	2.12117
C2	39	SPX5	2.40824	2.15621
C2	40	SPX5	2.43858	2.18654
C3	1	SPX5	0.255674	-0.00360475
C3	2	SPX5	0.263722	0.00373984
C3	3	SPX5	0.260908	0.000222428
C3	4	SPX5	0.260738	-0.000651545
C3	5	SPX5	0.265254	0.00316078
C3	6	SPX5	0.261241	-0.00155621
C3	7	SPX5	0.262551	-0.000949868
C3	8	SPX5	0.265378	0.00117353
C3	9	SPX5	0.264124	-0.000784714
C3	10	SPX5	0.266139	0.000526717
C3	11	SPX5	0.26862	0.00230342
C3	12	SPX5	0.265851	-0.00116881
C3	13	SPX5	0.267529	-0.000194769
C3	14	SPX5	0.268953	0.000525652
C3	15	SPX5	0.269399	0.000267842
C3	16	SPX5	0.267098	-0.0027373
C3	17	SPX5	0.265067	-0.00547242
C3	18	SPX5	0.271325	8.18143e-05
C3	19	SPX5	0.271609	-0.000338061
C3	20	SPX5	0.273922	0.00127166
C3	21	SPX5	0.277674	0.00431985
C3	22	SPX5	0.284196	0.0101375
C3	23	SPX5	0.299244	0.0244816
C3	24	SPX5	0.33187	0.0564048
C3	25	SPX5	0.383944	0.107775
C3	26	SPX5	0.488006	0.211133
C3	27	SPX5	0.67433	0.396753
C3	28	SPX5	0.963264	0.684983
C3	29	SPX5	1.33839	1.05941
C3	30	SPX5	1.70491	1.42522
C3	31	SPX5	1.96742	1.68703
C3	32	SPX5	2.14093	1.85983
C3	33	SPX5	2.28191	2.00011
C3	34	SPX5	2.39305	2.11054
C3	35	SPX5	2.48296	2.19975
C3	36	SPX5	2.5484	2.26449
C3	37	SPX5	2.60309	2.31848
C3	38	SPX5	2.63261	2.34729
C3	39	SPX5	2.6687	2.38268
C3	40	SPX5	2.70504	2.41831
C4	1	SPX6	0.250858	-0.0106578
C4	2	SPX6	0.261959	0.000452942
C4	3	SPX6	0.261651	0.000153642
C4	4	SPX6	0.261774	0.000286
C4	5	SPX6	0.263535	0.00205608
C4	6	SPX6	0.262826	0.00135675
C4	7	SPX6	0.259774	-0.00168618
C4	8	SPX6	0.261016	-0.000435314
C4	9	SPX6	0.260417	-0.00102519
C4	10	SPX6	0.26345	0.00201695
C4	11	SPX6	0.258851	-0.00257198
C4	12	SPX6	0.261408	-5.93096e-06
C4	13	SPX6	0.260178	-0.0012266
C4	14	SPX6	0.26086	-0.00053521
C4	15	SPX6	0.260424	-0.000962719
C4	16	SPX6	0.263299	0.0019215
C4	17	SPX6	0.261503	0.00013518
C4	18	SPX6	0.262238	0.000879111
C4	19	SPX6	0.261954	0.000604458
C4	20	SPX6	0.26084	-0.000500219
C4	21	SPX6	0.259396	-0.00193526
C4	22	SPX6	0.260355	-0.000966734
C4	23	SPX6	0.260626	-0.00068617
C4	24	SPX6	0.261595	0.000292007
C4	25	SPX6	0.26413	0.00283582
C4	26	SPX6	0.273219	0.0119342
C4	27	SPX6	0.288632	0.0273569
C4	28	SPX6	0.314604	0.0533374
C4	29	SPX6	0.37349	0.112233
C4	30	SPX6	0.456718	0.19547
C4	31	SPX6	0.590923	0.329685
C4	32	SPX6	0.739598	0.478369
C4	33	SPX6	0.865964	0.604744
C4	34	SPX6	0.998257	0.737046
C4	35	SPX6	1.13181	0.870611
C4	36	SPX6	1.26449	1.0033
C4	37	SPX6	1.39604	1.13486
C4	38	SPX6	1.50093	1.23975
C4	39	SPX6	1.60127	1.3401
C4	40	SPX6	1.68596	1.4248
C5	1	SPX6	0.245167	-0.00689279
C5	2	SPX6	0.250809	-0.00130908
C5	3	SPX6	0.251872	-0.00030435
C5	4	SPX6	0.250524	-0.00170971
C5	5	SPX6	0.252588	0.000295927
C5	6	SPX6	0.252418	6.73428e-05
C5	7	SPX6	0.253576	0.00116738
C5	8	SPX6	0.255352	0.00288488
C5	9	SPX6	0.252109	-0.000416052
C5	10	SPX6	0.252349	-0.000235242
C5	11	SPX6	0.25337	0.000727998
C5	12	SPX6	0.253848	0.00114812
C5	13	SPX6	0.251926	-0.000832333
C5	14	SPX6	0.253748	0.000930742
C5	15	SPX6	0.252848	-2.73435e-05
C5	16	SPX6	0.251824	-0.00110914
C5	17	SPX6	0.252454	-0.000537501
C5	18	SPX6	0.250818	-0.00223158
C5	19	SPX6	0.251765	-0.00134288
C5	20	SPX6	0.25198	-0.00118645
C5	21	SPX6	0.252666	-0.000558513
C5	22	SPX6	0.252457	-0.000825691
C5	23	SPX6	0.251971	-0.00136997
C5	24	SPX6	0.25518	0.00178088
C5	25	SPX6	0.257141	0.00368349
C5	26	SPX6	0.265724	0.0122082
C5	27	SPX6	0.279228	0.0256538
C5	28	SPX6	0.307425	0.0537924
C5	29	SPX6	0.359131	0.10544
C5	30	SPX6	0.444523	0.190774
C5	31	SPX6	0.577425	0.323618
C5	32	SPX6	0.731228	0.477362
C5	33	SPX6	0.872031	0.618107
C5	34	SPX6	1.01933	0.76535
C5	35	SPX6	1.16439	0.910348
C5	36	SPX6	1.29046	1.03637
C5	37	SPX6	1.42526	1.1711
C5	38	SPX6	1.54641	1.29219
C5	39	SPX6	1.64098	1.3867
C5	40	SPX6	1.73999	1.48565
C6	1	SPX6	0.241784	-0.00509511
C6	2	SPX6	0.243352	-0.0038324
C6	3	SPX6	0.246127	-0.0013634
C6	4	SPX6	0.248522	0.000726218
C6	5	SPX6	0.248774	0.000673108
C6	6	SPX6	0.248326	-8.02966e-05
C6	7	SPX6	0.249025	0.000313912
C6	8	SPX6	0.249357	0.000340493
C6	9	SPX6	0.24868	-0.000642196
C6	10	SPX6	0.24992	0.000292388
C6	11	SPX6	0.251054	0.00112126
C6	12	SPX6	0.252928	0.00269015
C6	13	SPX6	0.25053	-1.34937e-05
C6	14	SPX6	0.251513	0.000664924
C6	15	SPX6	0.251521	0.000367138
C6	16	SPX6	0.251465	5.60357e-06
C6	17	SPX6	0.250276	-0.00148866
C6	18	SPX6	0.251481	-0.000588361
C6	19	SPX6	0.251466	-0.00090844
C6	20	SPX6	0.248727	-0.00395327
C6	21	SPX6	0.250547	-0.00243849
C6	22	SPX6	0.250626	-0.00266499
C6	23	SPX6	0.253567	-2.91599e-05
C6	24	SPX6	0.254335	0.000433966
C6	25	SPX6	0.255081	0.000874264
C6	26	SPX6	0.260179	0.00566734
C6	27	SPX6	0.268777	0.0139595
C6	28	SPX6	0.288681	0.0335587
C6	29	SPX6	0.317202	0.0617739
C6	30	SPX6	0.37568	0.119947
C6	31	SPX6	0.468548	0.212509
C6	32	SPX6	0.60494	0.348596
C6	33	SPX6	0.763734	0.507085
C6	34	SPX6	0.944602	0.687648
C6	35	SPX6	1.10516	0.847896
C6	36	SPX6	1.24803	0.990463
C6	37	SPX6	1.40865	1.15078
C6	38	SPX6	1.54871	1.29054
C6	39	SPX6	1.66611	1.40763
C6	40	SPX6	1.7785	1.51971
C7	1	SPX7	0.245858	-0.00607588
C7	2	SPX7	0.251832	-0.000974327
C7	3	SPX7	0.257107	0.00342831
C7	4	SPX7	0.257427	0.00287654
C7	5	SPX7	0.258735	0.0033121
C7	6	SPX7	0.258558	0.00226234
C7	7	SPX7	0.260514	0.00334619
C7	8	SPX7	0.260768	0.00272853
C7	9	SPX7	0.258038	-0.000873802
C7	10	SPX7	0.259349	-0.000435146
C7	11	SPX7	0.25818	-0.00247643
C7	12	SPX7	0.257995	-0.00353355
C7	13	SPX7	0.260267	-0.00213374
C7	14	SPX7	0.258993	-0.00427987
C7	15	SPX7	0.258079	-0.00606551
C7	16	SPX7	0.256339	-0.00867778
C7	17	SPX7	0.256191	-0.00969851
C7	18	SPX7	0.256371	-0.0103899
C7	19	SPX7	0.273039	0.00540592
C7	20	SPX7	0.272271	0.00376536
C7	21	SPX7	0.274534	0.0051559
C7	22	SPX7	0.276995	0.00674508
C7	23	SPX7	0.28066	0.00953794
C7	24	SPX7	0.28943	0.0174353
C7	25	SPX7	0.306179	0.0333123
C7	26	SPX7	0.335881	0.0621425
C7	27	SPX7	0.392607	0.117997
C7	28	SPX7	0.490343	0.21486
C7	29	SPX7	0.641526	0.365171
C7	30	SPX7	0.860204	0.582977
C7	31	SPX7	1.12639	0.848293
C7	32	SPX7	1.3798	1.10083
C7	33	SPX7	1.58301	1.30316
C7	34	SPX7	1.7856	1.50488
C7	35	SPX7	1.96424	1.68265
C7	36	SPX7	2.1078	1.82534
C7	37	SPX7	2.22911	1.94578
C7	38	SPX7	2.31852	2.03431
C7	39	SPX7	2.3959	2.11082
C7	40	SPX7	2.4584	2.17245
C8	1	SPX7	0.292436	-0.00604006
C8	2	SPX7	0.298923	-9.85263e-05
C8	3	SPX7	0.300298	0.000731669
C8	4	SPX7	0.300757	0.000645413
C8	5	SPX7	0.300985	0.000328577
C8	6	SPX7	0.303309	0.00210753
C8	7	SPX7	0.304035	0.00228836
C8	8	SPX7	0.301708	-0.000582981
C8	9	SPX7	0.302288	-0.000548419
C8	10	SPX7	0.301577	-0.00180477
C8	11	SPX7	0.3049	0.00097363
C8	12	SPX7	0.302791	-0.00168013
C8	13	SPX7	0.305837	0.000820549
C8	14	SPX7	0.302832	-0.00272898
C8	15	SPX7	0.306253	0.000146732
C8	16	SPX7	0.304902	-0.00174978
C8	17	SPX7	0.305069	-0.0021269
C8	18	SPX7	0.304913	-0.00282885
C8	19	SPX7	0.308048	-0.000238823
C8	20	SPX7	0.30819	-0.000640864
C8	21	SPX7	0.308006	-0.00136987
C8	22	SPX7	0.311305	0.00138323
C8	23	SPX7	0.317341	0.00687466
C8	24	SPX7	0.327109	0.016098
C8	25	SPX7	0.347462	0.0359055
C8	26	SPX7	0.381473	0.0693712
C8	27	SPX7	0.449057	0.136411
C8	28	SPX7	0.558374	0.245183
C8	29	SPX7	0.735098	0.421362
C8	30	SPX7	0.98214	0.667859
C8	31	SPX7	1.29858	0.983757
C8	32	SPX7	1.59624	1.28087
C8	33	SPX7	1.83685	1.52093
C8	34	SPX7	2.03391	1.71744
C8	35	SPX7	2.19487	1.87786
C8	36	SPX7	2.3063	1.98874
C8	37	SPX7	2.41201	2.09391
C8	38	SPX7	2.4957	2.17706
C8	39	SPX7	2.54281	2.22362
C8	40	SPX7	2.59164	2.27191
C9	1	SPX7	0.315285	-0.00722625
C9	2	SPX7	0.318702	-0.00419547
C9	3	SPX7	0.324071	0.000787357
C9	4	SPX7	0.322882	-0.000788054
C9	5	SPX7	0.324907	0.000850149
C9	6	SPX7	0.323799	-0.000644349
C9	7	SPX7	0.324889	5.89256e-05
C9	8	SPX7	0.325709	0.000492281
C9	9	SPX7	0.328083	0.00248021
C9	10	SPX7	0.327501	0.00151176
C9	11	SPX7	0.325219	-0.0011568
C9	12	SPX7	0.324324	-0.00243783
C9	13	SPX7	0.327157	8.49633e-06
C9	14	SPX7	0.325943	-0.00159251
C9	15	SPX7	0.325824	-0.00209749
C9	16	SPX7	0.329828	0.00152004
C9	17	SPX7	0.329738	0.00104341
C9	18	SPX7	0.327922	-0.00115866
C9	19	SPX7	0.328318	-0.0011493
C9	20	SPX7	0.327338	-0.00251624
C9	21	SPX7	0.33039	0.000149456
C9	22	SPX7	0.335266	0.00463915
C9	23	SPX7	0.341721	0.0107071
C9	24	SPX7	0.352107	0.0207075
C9	25	SPX7	0.374654	0.0428672
C9	26	SPX7	0.411221	0.0790484
C9	27	SPX7	0.485049	0.15249
C9	28	SPX7	0.605401	0.272455
C9	29	SPX7	0.792841	0.459509
C9	30	SPX7	1.05262	0.718901
C9	31	SPX7	1.3548	1.0207
C9	32	SPX7	1.62356	1.28907
C9	33	SPX7	1.82954	1.49466
C9	34	SPX7	2.01356	1.67829
C9	35	SPX7	2.14496	1.80931
C9	36	SPX7	2.2359	1.89986
C9	37	SPX7	2.33673	2.00031
C9	38	SPX7	2.40399	2.06718
C9	39	SPX7	2.44842	2.11122
C9	40	SPX7	2.4893	2.15172
C10	1	SPX8	0.245167	-0.00822357
C10	2	SPX8	0.251112	-0.00257713
C10	3	SPX8	0.255403	0.00141521
C10	4	SPX8	0.255193	0.000907248
C10	5	SPX8	0.253913	-0.000671214
C10	6	SPX8	0.254802	-8.02755e-05
C10	7	SPX8	0.252783	-0.00239819
C10	8	SPX8	0.254607	-0.000872356
C10	9	SPX8	0.256443	0.000665641
C10	10	SPX8	0.254113	-0.00196267
C10	11	SPX8	0.256591	0.000217271
C10	12	SPX8	0.256922	0.000249624
C10	13	SPX8	0.256587	-0.000383657
C10	14	SPX8	0.257701	0.000431752
C10	15	SPX8	0.25736	-0.000207937
C10	16	SPX8	0.258524	0.000658136
C10	17	SPX8	0.258746	0.000582218
C10	18	SPX8	0.257064	-0.00139816
C10	19	SPX8	0.258643	-0.000117654
C10	20	SPX8	0.260059	0.00100007
C10	21	SPX8	0.261416	0.00205887
C10	22	SPX8	0.259282	-0.000373424
C10	23	SPX8	0.261494	0.00154011
C10	24	SPX8	0.259751	-0.00050124
C10	25	SPX8	0.260458	-9.28708e-05
C10	26	SPX8	0.261131	0.000281703
C10	27	SPX8	0.261475	0.000328003
C10	28	SPX8	0.262791	0.0013452
C10	29	SPX8	0.262745	0.00100059
C10	30	SPX8	0.260771	-0.00127111
C10	31	SPX8	0.261375	-0.00096621
C10	32	SPX8	0.263137	0.000497847
C10	33	SPX8	0.261311	-0.00162624
C10	34	SPX8	0.26548	0.00224406
C10	35	SPX8	0.262931	-0.000603504
C10	36	SPX8	0.264046	0.000213127
C10	37	SPX8	0.263252	-0.0008792
C10	38	SPX8	0.262866	-0.00156306
C10	39	SPX8	0.26506	0.000332271
C10	40	SPX8	0.262884	-0.00214229
C11	1	SPX8	0.239288	-0.00922743
C11	2	SPX8	0.246111	-0.00245222
C11	3	SPX8	0.24548	-0.00313111
C11	4	SPX8	0.246958	-0.00170087
C11	5	SPX8	0.24738	-0.00132675
C11	6	SPX8	0.249484	0.000729666
C11	7	SPX8	0.24835	-0.000452359
C11	8	SPX8	0.251375	0.00252468
C11	9	SPX8	0.249454	0.000555486
C11	10	SPX8	0.2473	-0.00164584
C11	11	SPX8	0.250032	0.00103817
C11	12	SPX8	0.250308	0.00126557
C11	13	SPX8	0.246694	-0.00239571
C11	14	SPX8	0.250211	0.00107352
C11	15	SPX8	0.248508	-0.000677853
C11	16	SPX8	0.249476	0.000241737
C11	17	SPX8	0.251383	0.00210128
C11	18	SPX8	0.250121	0.000791863
C11	19	SPX8	0.249893	0.000515009
C11	20	SPX8	0.250172	0.000746703
C11	21	SPX8	0.249785	0.000311763
C11	22	SPX8	0.250633	0.00111201
C11	23	SPX8	0.253062	0.00349311
C11	24	SPX8	0.24872	-0.000897065
C11	25	SPX8	0.250425	0.000760491
C11	26	SPX8	0.250977	0.00126449
C11	27	SPX8	0.249028	-0.000732481
C11	28	SPX8	0.24922	-0.000588392
C11	29	SPX8	0.249018	-0.000838662
C11	30	SPX8	0.249116	-0.000788569
C11	31	SPX8	0.250391	0.000438596
C11	32	SPX8	0.248155	-0.00184585
C11	33	SPX8	0.251491	0.00144254
C11	34	SPX8	0.249889	-0.000207057
C11	35	SPX8	0.250337	0.000192617
C11	36	SPX8	0.248035	-0.00215735
C11	37	SPX8	0.250447	0.000207032
C11	38	SPX8	0.250209	-7.84051e-05
C11	39	SPX8	0.248994	-0.00134201
C11	40	SPX8	0.249983	-0.000400221
C12	1	SPX8	0.308902	-0.00879066
C12	2	SPX8	0.312206	-0.00502747
C12	3	SPX8	0.313669	-0.00310522
C12	4	SPX8	0.314581	-0.00173432
C12	5	SPX8	0.316289	0.000432688
C12	6	SPX8	0.316791	0.00139342
C12	7	SPX8	0.31566	0.000721429
C12	8	SPX8	0.313768	-0.000711652
C12	9	SPX8	0.312562	-0.00145904
C12	10	SPX8	0.313452	-0.000110016
C12	11	SPX8	0.312558	-0.000544421
C12	12	SPX8	0.313705	0.00106138
C12	13	SPX8	0.311892	-0.000292485
C12	14	SPX8	0.310753	-0.000973057
C12	15	SPX8	0.311019	-0.000247705
C12	16	SPX8	0.308274	-0.00253337
C12	17	SPX8	0.313086	0.00273678
C12	18	SPX8	0.313878	0.00398856
C12	19	SPX8	0.310853	0.00142209
C12	20	SPX8	0.305591	-0.0033813
C12	21	SPX8	0.311006	0.00249282
C12	22	SPX8	0.308627	0.000573303
C12	23	SPX8	0.307194	-0.000400882
C12	24	SPX8	0.310924	0.00378777
C12	25	SPX8	0.30943	0.00275308
C12	26	SPX8	0.307282	0.00106436
C12	27	SPX8	0.305708	-5.06113e-05
C12	28	SPX8	0.305113	-0.000187172
C12	29	SPX8	0.306687	0.00184579
C12	30	SPX8	0.304124	-0.000258204
C12	31	SPX8	0.301052	-0.00287113
C12	32	SPX8	0.305964	0.00250035
C12	33	SPX8	0.301147	-0.00185798
C12	34	SPX8	0.301257	-0.00128903
C12	35	SPX8	0.299488	-0.00259933
C12	36	SPX8	0.29964	-0.00198815
C12	37	SPX8	0.302428	0.00125911
C12	38	SPX8	0.299043	-0.00166737
C12	39	SPX8	0.300481	0.000229542
C12	40	SPX8	0.300342	0.000549493
D1	1	SPX5	0.31489	-0.00516049
D1	2	SPX5	0.318271	-0.00221384
D1	3	SPX5	0.322855	0.00193592
D1	4	SPX5	0.322772	0.00141897
D1	5	SPX5	0.323831	0.00204304
D1	6	SPX5	0.321733	-0.000489144
D1	7	SPX5	0.322334	-0.000322249
D1	8	SPX5	0.320579	-0.00251191
D1	9	SPX5	0.323231	-0.000294557
D1	10	SPX5	0.322966	-0.000994343
D1	11	SPX5	0.325173	0.000778212
D1	12	SPX5	0.325564	0.000735001
D1	13	SPX5	0.324214	-0.00104902
D1	14	SPX5	0.321896	-0.00380243
D1	15	SPX5	0.322136	-0.00399677
D1	16	SPX5	0.325798	-0.000768873
D1	17	SPX5	0.326969	-3.23956e-05
D1	18	SPX5	0.328619	0.00118369
D1	19	SPX5	0.334037	0.00616685
D1	20	SPX5	0.343511	0.0152063
D1	21	SPX5	0.363525	0.0347861
D1	22	SPX5	0.399149	0.069975
D1	23	SPX5	0.471508	0.1419
D1	24	SPX5	0.598045	0.268003
D1	25	SPX5	0.813839	0.483362
D1	26	SPX5	1.12801	0.797101
D1	27	SPX5	1.51444	1.1831
D1	28	SPX5	1.83841	1.50663
D1	29	SPX5	2.04757	1.71535
D1	30	SPX5	2.2023	1.86965
D1	31	SPX5	2.33268	1.9996
D1	32	SPX5	2.42448	2.09097
D1	33	SPX5	2.50357	2.16962
D1	34	SPX5	2.57077	2.23638
D1	35	SPX5	2.61724	2.28242
D1	36	SPX5	2.6413	2.30605
D1	37	SPX5	2.67685	2.34115
D1	38	SPX5	2.69969	2.36357
D1	39	SPX5	2.71694	2.38038
D1	40	SPX5	2.72894	2.39195
D2	1	SPX5	0.259644	-0.00157316
D2	2	SPX5	0.259031	-0.00292467
D2	3	SPX5	0.262602	-9.18142e-05
D2	4	SPX5	0.262457	-0.000974264
D2	5	SPX5	0.268159	0.00398886
D2	6	SPX5	0.263944	-0.0009636
D2	7	SPX5	0.263007	-0.00263882
D2	8	SPX5	0.266956	0.000571452
D2	9	SPX5	0.267152	2.90765e-05
D2	10	SPX5	0.269258	0.00139661
D2	11	SPX5	0.268679	7.9526e-05
D2	12	SPX5	0.268195	-0.00114213
D2	13	SPX5	0.269643	-0.000432335
D2	14	SPX5	0.271196	0.000382071
D2	15	SPX5	0.270735	-0.000816731
D2	16	SPX5	0.269885	-0.00240532
D2	17	SPX5	0.273822	0.000793155
D2	18	SPX5	0.275991	0.00222426
D2	19	SPX5	0.278298	0.00379299
D2	20	SPX5	0.289487	0.0142436
D2	21	SPX5	0.304871	0.0288898
D2	22	SPX5	0.339423	0.0627033
D2	23	SPX5	0.398537	0.121079
D2	24	SPX5	0.514621	0.236426
D2	25	SPX5	0.712279	0.433345
D2	26	SPX5	1.01233	0.732656
D2	27	SPX5	1.39598	1.11557
D2	28	SPX5	1.75928	1.47813
D2	29	SPX5	1.99312	1.71123
D2	30	SPX5	2.16182	1.87919
D2	31	SPX5	2.28009	1.99673
D2	32	SPX5	2.3869	2.1028
D2	33	SPX5	2.47211	2.18727
D2	34	SPX5	2.52466	2.23908
D2	35	SPX5	2.58082	2.2945
D2	36	SPX5	2.61175	2.3247
D2	37	SPX5	2.64612	2.35833
D2	38	SPX5	2.66861	2.38008
D2	39	SPX5	2.69058	2.40131
D2	40	SPX5	2.7073	2.41729
D3	1	SPX5	0.281817	-0.0030292
D3	2	SPX5	0.284654	-0.000468096
D3	3	SPX5	0.282941	-0.00245757
D3	4	SPX5	0.285414	-0.000261002
D3	5	SPX5	0.289128	0.00317668
D3	6	SPX5	0.289203	0.00297645
D3	7	SPX5	0.288431	0.00192748
D3	8	SPX5	0.287307	0.000527799
D3	9	SPX5	0.288244	0.00118841
D3	10	SPX5	0.287058	-0.000273141
D3	11	SPX5	0.285327	-0.00228088
D3	12	SPX5	0.28428	-0.00360361
D3	13	SPX5	0.288202	4.26248e-05
D3	14	SPX5	0.285436	-0.00299961
D3	15	SPX5	0.287237	-0.00147494
D3	16	SPX5	0.283882	-0.00510655
D3	17	SPX5	0.288266	-0.000998019
D3	18	SPX5	0.292678	0.00313742
D3	19	SPX5	0.296295	0.00647846
D3	20	SPX5	0.303987	0.0138941
D3	21	SPX5	0.322345	0.0319765
D3	22	SPX5	0.357653	0.0670082
D3	23	SPX5	0.424702	0.133781
D3	24	SPX5	0.545856	0.254659
D3	25	SPX5	0.75617	0.464697
D3	26	SPX5	1.07338	0.781632
D3	27	SPX5	1.46659	1.17457
D3	28	SPX5	1.82457	1.53227
D3	29	SPX5	2.06176	1.76918
D3	30	SPX5	2.22209	1.92924
D3	31	SPX5	2.3558	2.06267
D3	32	SPX5	2.45627	2.16287
D3	33	SPX5	2.53522	2.24154
D3	34	SPX5	2.60003	2.30607
D3	35	SPX5	2.63898	2.34475
D3	36	SPX5	2.68122	2.38671
D3	37	SPX5	2.70491	2.41013
D3	38	SPX5	2.72812	2.43306
D3	39	SPX5	2.75299	2.45765
D3	40	SPX5	2.75257	2.45696
D4	1	SPX6	0.25845	-0.00401934
D4	2	SPX6	0.262004	-0.000795421
D4	3	SPX6	0.26459	0.00146052
D4	4	SPX6	0.262169	-0.0012902
D4	5	SPX6	0.26667	0.00288102
D4	6	SPX6	0.265794	0.00167461
D4	7	SPX6	0.263234	-0.00121592
D4	8	SPX6	0.264018	-0.00076179
D4	9	SPX6	0.268148	0.00303851
D4	10	SPX6	0.264841	-0.000599045
D4	11	SPX6	0.262632	-0.00313788
D4	12	SPX6	0.266834	0.000733649
D4	13	SPX6	0.265903	-0.000526902
D4	14	SPX6	0.266275	-0.000485301
D4	15	SPX6	0.266453	-0.000636699
D4	16	SPX6	0.26506	-0.00236059
D4	17	SPX6	0.265135	-0.00261519
D4	18	SPX6	0.266993	-0.00108765
D4	19	SPX6	0.264773	-0.00363804
D4	20	SPX6	0.270519	0.00177832
D4	21	SPX6	0.26864	-0.000430842
D4	22	SPX6	0.272555	0.00315378
D4	23	SPX6	0.273797	0.00406564
D4	24	SPX6	0.27898	0.00891897
D4	25	SPX6	0.290523	0.020132
D4	26	SPX6	0.308597	0.0378759
D4	27	SPX6	0.350177	0.0791255
D4	28	SPX6	0.421998	0.150617
D4	29	SPX6	0.533031	0.261319
D4	30	SPX6	0.698698	0.426657
D4	31	SPX6	0.897435	0.625063
D4	32	SPX6	1.085	0.812296
D4	33	SPX6	1.23878	0.96575
D4	34	SPX6	1.40044	1.12708
D4	35	SPX6	1.54881	1.27511
D4	36	SPX6	1.66679	1.39277
D4	37	SPX6	1.78662	1.51227
D4	38	SPX6	1.87739	1.60271
D4	39	SPX6	1.94965	1.67463
D4	40	SPX6	2.01731	1.74197
D5	1	SPX6	0.28054	-0.0142517
D5	2	SPX6	0.28887	-0.00642555
D5	3	SPX6	0.294515	-0.00128562
D5	4	SPX6	0.295543	-0.000762218
D5	5	SPX6	0.297497	0.000687619
D5	6	SPX6	0.29871	0.00139577
D5	7	SPX6	0.298751	0.000931727
D5	8	SPX6	0.299891	0.00156787
D5	9	SPX6	0.299116	0.000288172
D5	10	SPX6	0.298965	-0.000367913
D5	11	SPX6	0.301923	0.00208599
D5	12	SPX6	0.299656	-0.000685668
D5	13	SPX6	0.300191	-0.000655436
D5	14	SPX6	0.302441	0.00108968
D5	15	SPX6	0.30033	-0.00152605
D5	16	SPX6	0.302143	-0.000217451
D5	17	SPX6	0.3021	-0.000764697
D5	18	SPX6	0.301818	-0.00155141
D5	19	SPX6	0.30169	-0.00218419
D5	20	SPX6	0.30281	-0.00156813
D5	21	SPX6	0.301758	-0.00312514
D5	22	SPX6	0.304318	-0.00106981
D5	23	SPX6	0.306116	0.000223687
D5	24	SPX6	0.31389	0.0074932
D5	25	SPX6	0.322495	0.0155937
D5	26	SPX6	0.340521	0.0331149
D5	27	SPX6	0.381854	0.0739428
D5	28	SPX6	0.453233	0.144817
D5	29	SPX6	0.569915	0.260995
D5	30	SPX6	0.733002	0.423578
D5	31	SPX6	0.923455	0.613526
D5	32	SPX6	1.09789	0.787456
D5	33	SPX6	1.2508	0.939865
D5	34	SPX6	1.41412	1.10268
D5	35	SPX6	1.55994	1.24799
D5	36	SPX6	1.67194	1.35949
D5	37	SPX6	1.79956	1.48661
D5	38	SPX6	1.89372	1.58026
D5	39	SPX6	1.97545	1.66149
D5	40	SPX6	2.04804	1.73357
D6	1	SPX6	0.311159	-0.0199342
D6	2	SPX6	0.322617	-0.00850296
D6	3	SPX6	0.327012	-0.00413486
D6	4	SPX6	0.330686	-0.000486847
D6	5	SPX6	0.330688	-0.000511433
D6	6	SPX6	0.332113	0.00088722
D6	7	SPX6	0.333766	0.00251365
D6	8	SPX6	0.332483	0.00120372
D6	9	SPX6	0.332545	0.00123946
D6	10	SPX6	0.330948	-0.000383697
D6	11	SPX6	0.332331	0.000972429
D6	12	SPX6	0.332995	0.00161011
D6	13	SPX6	0.331519	0.000107954
D6	14	SPX6	0.33231	0.000872325
D6	15	SPX6	0.331564	9.97604e-05
D6	16	SPX6	0.33309	0.00159909
D6	17	SPX6	0.330178	-0.00133903
D6	18	SPX6	0.330759	-0.000783995
D6	19	SPX6	0.329351	-0.0022185
D6	20	SPX6	0.330485	-0.00111116
D6	21	SPX6	0.327255	-0.00436748
D6	22	SPX6	0.332528	0.000878858
D6	23	SPX6	0.332175	0.000499475
D6	24	SPX6	0.334555	0.00285297
D6	25	SPX6	0.34245	0.010721
D6	26	SPX6	0.353983	0.0222275
D6	27	SPX6	0.380164	0.0483819
D6	28	SPX6	0.42806	0.0962521
D6	29	SPX6	0.504335	0.172501
D6	30	SPX6	0.622254	0.290393
D6	31	SPX6	0.778356	0.446469
D6	32	SPX6	0.936861	0.604947
D6	33	SPX6	1.08117	0.74923
D6	34	SPX6	1.23493	0.902963
D6	35	SPX6	1.3765	1.0445
D6	36	SPX6	1.50474	1.17272
D6	37	SPX6	1.62896	1.29692
D6	38	SPX6	1.73171	1.39964
D6	39	SPX6	1.82419	1.49209
D6	40	SPX6	1.90393	1.57181
D7	1	SPX7	0.239697	-0.00952043
D7	2	SPX7	0.245849	-0.00324313
D7	3	SPX7	0.249289	0.00032228
D7	4	SPX7	0.248425	-0.00041703
D7	5	SPX7	0.250194	0.0014766
D7	6	SPX7	0.24803	-0.000562012
D7	7	SPX7	0.248579	0.000111546
D7	8	SPX7	0.248785	0.000442764
D7	9	SPX7	0.24816	-5.701e-05
D7	10	SPX7	0.249298	0.00120535
D7	11	SPX7	0.24817	0.00020244
D7	12	SPX7	0.244911	-0.0029318
D7	13	SPX7	0.247976	0.000258609
D7	14	SPX7	0.247314	-0.000278522
D7	15	SPX7	0.246994	-0.000473702
D7	16	SPX7	0.246136	-0.00120663
D7	17	SPX7	0.246527	-0.000690224
D7	18	SPX7	0.246965	-0.000127427
D7	19	SPX7	0.247754	0.000785712
D7	20	SPX7	0.247733	0.000890359
D7	21	SPX7	0.247767	0.00104869
D7	22	SPX7	0.255669	0.00907571
D7	23	SPX7	0.266638	0.02017
D7	24	SPX7	0.286006	0.039663
D7	25	SPX7	0.3252	0.0789816
D7	26	SPX7	0.38678	0.140687
D7	27	SPX7	0.504899	0.258931
D7	28	SPX7	0.688842	0.442999
D7	29	SPX7	0.935614	0.689896
D7	30	SPX7	1.2145	0.968902
D7	31	SPX7	1.48077	1.2353
D7	32	SPX7	1.69288	1.44753
D7	33	SPX7	1.87312	1.6279
D7	34	SPX7	2.05076	1.80566
D7	35	SPX7	2.18655	1.94158
D7	36	SPX7	2.2915	2.04666
D7	37	SPX7	2.37858	2.13386
D7	38	SPX7	2.44078	2.19618
D7	39	SPX7	2.49975	2.25528
D7	40	SPX7	2.53421	2.28987
D8	1	SPX7	0.232083	-0.010029
D8	2	SPX7	0.239048	-0.00342512
D8	3	SPX7	0.240653	-0.00218164
D8	4	SPX7	0.242684	-0.000511929
D8	5	SPX7	0.244963	0.00140456
D8	6	SPX7	0.242993	-0.000926363
D8	7	SPX7	0.2451	0.00081912
D8	8	SPX7	0.245958	0.00131495
D8	9	SPX7	0.246571	0.00156671
D8	10	SPX7	0.246284	0.000918499
D8	11	SPX7	0.246164	0.000436676
D8	12	SPX7	0.246366	0.000276987
D8	13	SPX7	0.24683	0.000378872
D8	14	SPX7	0.24531	-0.00150189
D8	15	SPX7	0.246197	-0.000976883
D8	16	SPX7	0.247448	-8.78441e-05
D8	17	SPX7	0.247453	-0.000444438
D8	18	SPX7	0.246621	-0.00163798
D8	19	SPX7	0.247022	-0.00159776
D8	20	SPX7	0.247721	-0.00126087
D8	21	SPX7	0.253355	0.00401123
D8	22	SPX7	0.259398	0.00969346
D8	23	SPX7	0.271154	0.0210872
D8	24	SPX7	0.291278	0.0408496
D8	25	SPX7	0.331046	0.0802564
D8	26	SPX7	0.398177	0.147025
D8	27	SPX7	0.521577	0.270064
D8	28	SPX7	0.706585	0.45471
D8	29	SPX7	0.942215	0.689979
D8	30	SPX7	1.18902	0.936426
D8	31	SPX7	1.40878	1.15582
D8	32	SPX7	1.59381	1.34049
D8	33	SPX7	1.76399	1.5103
D8	34	SPX7	1.93297	1.67893
D8	35	SPX7	2.063	1.8086
D8	36	SPX7	2.16842	1.91365
D8	37	SPX7	2.25279	1.99766
D8	38	SPX7	2.32689	2.0714
D8	39	SPX7	2.38173	2.12588
D8	40	SPX7	2.42381	2.16759
D9	1	SPX7	0.348126	-0.00169487
D9	2	SPX7	0.350699	0.000913379
D9	3	SPX7	0.350681	0.000930253
D9	4	SPX7	0.350793	0.00107751
D9	5	SPX7	0.350271	0.000590785
D9	6	SPX7	0.350213	0.000567247
D9	7	SPX7	0.350898	0.00128805
D9	8	SPX7	0.348377	-0.0011977
D9	9	SPX7	0.349555	1.53236e-05
D9	10	SPX7	0.349504	-7.34549e-07
D9	11	SPX7	0.350933	0.00146301
D9	12	SPX7	0.347642	-0.00179262
D9	13	SPX7	0.348426	-0.000973258
D9	14	SPX7	0.34992	0.000555458
D9	15	SPX7	0.345892	-0.00343712
D9	16	SPX7	0.347565	-0.00172948
D9	17	SPX7	0.349018	-0.000241858
D9	18	SPX7	0.347547	-0.00167722
D9	19	SPX7	0.34651	-0.0026792
D9	20	SPX7	0.347456	-0.00169813
D9	21	SPX7	0.350124	0.00100477
D9	22	SPX7	0.357019	0.00793491
D9	23	SPX7	0.365331	0.016282
D9	24	SPX7	0.379079	0.0300657
D9	25	SPX7	0.411389	0.0624107
D9	26	SPX7	0.464052	0.115108
D9	27	SPX7	0.557937	0.209028
D9	28	SPX7	0.711358	0.362485
D9	29	SPX7	0.931608	0.58277
D9	30	SPX7	1.22036	0.871558
D9	31	SPX7	1.51752	1.16876
D9	32	SPX7	1.76058	1.41185
D9	33	SPX7	1.93848	1.58979
D9	34	SPX7	2.08436	1.7357
D9	35	SPX7	2.19937	1.85074
D9	36	SPX7	2.29584	1.94725
D9	37	SPX7	2.3676	2.01904
D9	38	SPX7	2.42303	2.0745
D9	39	SPX7	2.46644	2.11796
D9	40	SPX7	2.49482	2.14637
D10	1	SPX8	0.30012	-0.00412958
D10	2	SPX8	0.302962	-0.00139363
D10	3	SPX8	0.302255	-0.00220512
D10	4	SPX8	0.30426	-0.000305819
D10	5	SPX8	0.304836	0.000165623
D10	6	SPX8	0.303088	-0.00168814
D10	7	SPX8	0.304887	6.21017e-06
D10	8	SPX8	0.305369	0.000382375
D10	9	SPX8	0.304646	-0.000446041
D10	10	SPX8	0.30515	-4.67198e-05
D10	11	SPX8	0.306763	0.00146089
D10	12	SPX8	0.306622	0.00121475
D10	13	SPX8	0.305513	4.26446e-07
D10	14	SPX8	0.307134	0.0015168
D10	15	SPX8	0.306848	0.00112555
D10	16	SPX8	0.305999	0.000170626
D10	17	SPX8	0.304808	-0.00112512
D10	18	SPX8	0.306829	0.000790514
D10	19	SPX8	0.30656	0.000416733
D10	20	SPX8	0.306701	0.000451721
D10	21	SPX8	0.30755	0.00119639
D10	22	SPX8	0.305777	-0.000682586
D10	23	SPX8	0.307639	0.00107435
D10	24	SPX8	0.306677	7.81361e-06
D10	25	SPX8	0.304802	-0.00197303
D10	26	SPX8	0.307637	0.000756745
D10	27	SPX8	0.304968	-0.0020169
D10	28	SPX8	0.30772	0.000629101
D10	29	SPX8	0.305422	-0.00177377
D10	30	SPX8	0.308266	0.000965569
D10	31	SPX8	0.308366	0.000960293
D10	32	SPX8	0.310027	0.00251544
D10	33	SPX8	0.306018	-0.00159895
D10	34	SPX8	0.305852	-0.00187006
D10	35	SPX8	0.307901	7.37325e-05
D10	36	SPX8	0.308976	0.00104365
D10	37	SPX8	0.307848	-0.000189095
D10	38	SPX8	0.307137	-0.00100523
D10	39	SPX8	0.308249	1.28171e-06
D10	40	SPX8	0.306882	-0.0014708
D11	1	SPX8	0.293413	-0.00796793
D11	2	SPX8	0.298814	-0.00257118
D11	3	SPX8	0.299371	-0.00201841
D11	4	SPX8	0.298322	-0.00307204
D11	5	SPX8	0.300947	-0.000451136
D11	6	SPX8	0.30053	-0.000873259
D11	7	SPX8	0.30041	-0.000997387
D11	8	SPX8	0.300114	-0.00129765
D11	9	SPX8	0.303496	0.00208065
D11	10	SPX8	0.301153	-0.000267088
D11	11	SPX8	0.302037	0.000612556
D11	12	SPX8	0.300101	-0.0013277
D11	13	SPX8	0.304464	0.0030311
D11	14	SPX8	0.302241	0.000804298
D11	15	SPX8	0.299151	-0.00229079
D11	16	SPX8	0.302083	0.000636954
D11	17	SPX8	0.303001	0.00155126
D11	18	SPX8	0.304728	0.00327329
D11	19	SPX8	0.303398	0.00193892
D11	20	SPX8	0.301288	-0.000174781
D11	21	SPX8	0.300119	-0.00134813
D11	22	SPX8	0.302303	0.000831252
D11	23	SPX8	0.30163	0.000154618
D11	24	SPX8	0.302088	0.000608446
D11	25	SPX8	0.302664	0.00117919
D11	26	SPX8	0.303558	0.00206914
D11	27	SPX8	0.302672	0.00117912
D11	28	SPX8	0.302319	0.000822121
D11	29	SPX8	0.301934	0.000432185
D11	30	SPX8	0.301699	0.000193228
D11	31	SPX8	0.302439	0.000929194
D11	32	SPX8	0.300205	-0.00130944
D11	33	SPX8	0.302216	0.000697775
D11	34	SPX8	0.300837	-0.00068577
D11	35	SPX8	0.301235	-0.000291785
D11	36	SPX8	0.300566	-0.000965141
D11	37	SPX8	0.297996	-0.00353991
D11	38	SPX8	0.303125	0.00158498
D11	39	SPX8	0.297845	-0.00369987
D11	40	SPX8	0.302839	0.00129038
D12	1	SPX8	0.971841	-0.013192
D12	2	SPX8	0.97232	-0.0088772
D12	3	SPX8	0.974801	-0.00256065
D12	4	SPX8	0.977114	0.00358883
D12	5	SPX8	0.977212	0.00752286
D12	6	SPX8	0.977436	0.011583
D12	7	SPX8	0.967703	0.00568628
D12	8	SPX8	0.966765	0.00858445
D12	9	SPX8	0.956562	0.00221755
D12	10	SPX8	0.950077	-0.00043074
D12	11	SPX8	0.945633	-0.001039
D12	12	SPX8	0.943734	0.000897923
D12	13	SPX8	0.933262	-0.00573708
D12	14	SPX8	0.931629	-0.00353462
D12	15	SPX8	0.925361	-0.0059666
D12	16	SPX8	0.926472	-0.00101857
D12	17	SPX8	0.921882	-0.0017731
D12	18	SPX8	0.91861	-0.00120917
D12	19	SPX8	0.914449	-0.00153335
D12	20	SPX8	0.90419	-0.00795634
D12	21	SPX8	0.902801	-0.00550968
D12	22	SPX8	0.899545	-0.00492913
D12	23	SPX8	0.894469	-0.00616848
D12	24	SPX8	0.892329	-0.0044726
D12	25	SPX8	0.890123	-0.00284306
D12	26	SPX8	0.882945	-0.00618407
D12	27	SPX8	0.882047	-0.00324657
D12	28	SPX8	0.879694	-0.00176353
D12	29	SPX8	0.871646	-0.00597531
D12	30	SPX8	0.872342	-0.00144243
D12	31	SPX8	0.869125	-0.000823843
D12	32	SPX8	0.868483	0.00237103
D12	33	SPX8	0.863904	0.00162795
D12	34	SPX8	0.861593	0.00315271
D12	35	SPX8	0.856697	0.00209282
D12	36	SPX8	0.857235	0.0064674
D12	37	SPX8	0.85351	0.00657839
D12	38	SPX8	0.848355	0.0052594
D12	39	SPX8	0.847747	0.0084873
D12	40	SPX8	0.843703	0.00827947
E1	1	SPX5	0.317038	-0.00665996
E1	2	SPX5	0.322494	-0.00159291
E1	3	SPX5	0.322811	-0.0016656
E1	4	SPX5	0.324888	2.21875e-05
E1	5	SPX5	0.325547	0.000291807
E1	6	SPX5	0.329134	0.00348977
E1	7	SPX5	0.327731	0.00169674
E1	8	SPX5	0.325274	-0.00114914
E1	9	SPX5	0.328734	0.00192151
E1	10	SPX5	0.326617	-0.00058493
E1	11	SPX5	0.326097	-0.00149438
E1	12	SPX5	0.329429	0.0014486
E1	13	SPX5	0.327607	-0.000762409
E1	14	SPX5	0.325573	-0.00318597
E1	15	SPX5	0.325638	-0.00351064
E1	16	SPX5	0.325942	-0.00359525
E1	17	SPX5	0.330098	0.000170662
E1	18	SPX5	0.332316	0.00199957
E1	19	SPX5	0.335613	0.00490747
E1	20	SPX5	0.340066	0.00897146
E1	21	SPX5	0.355906	0.0244215
E1	22	SPX5	0.382717	0.0508436
E1	23	SPX5	0.433632	0.101369
E1	24	SPX5	0.538989	0.206337
E1	25	SPX5	0.712535	0.379494
E1	26	SPX5	0.986109	0.652678
E1	27	SPX5	1.35855	1.02473
E1	28	SPX5	1.72465	1.39044
E1	29	SPX5	1.97703	1.64243
E1	30	SPX5	2.15344	1.81846
E1	31	SPX5	2.28994	1.95457
E1	32	SPX5	2.39612	2.06036
E1	33	SPX5	2.47641	2.14026
E1	34	SPX5	2.5419	2.20535
E1	35	SPX5	2.60391	2.26698
E1	36	SPX5	2.64479	2.30747
E1	37	SPX5	2.6632	2.32549
E1	38	SPX5	2.69177	2.35367
E1	39	SPX5	2.70578	2.36729
E1	40	SPX5	2.72077	2.38189
E2	1	SPX5	0.350096	-0.000416193
E2	2	SPX5	0.348196	-0.00230272
E2	3	SPX5	0.352893	0.00240758
E2	4	SPX5	0.354307	0.00383406
E2	5	SPX5	0.34888	-0.00157954
E2	6	SPX5	0.348809	-0.00163725
E2	7	SPX5	0.347627	-0.00280665
E2	8	SPX5	0.349172	-0.00124857
E2	9	SPX5	0.350631	0.000224103
E2	10	SPX5	0.351916	0.00152159
E2	11	SPX5	0.350673	0.000291938
E2	12	SPX5	0.349617	-0.000750887
E2	13	SPX5	0.351573	0.00121796
E2	14	SPX5	0.349948	-0.000393581
E2	15	SPX5	0.344668	-0.00566026
E2	16	SPX5	0.348602	-0.00171382
E2	17	SPX5	0.352356	0.00205336
E2	18	SPX5	0.35039	0.000100999
E2	19	SPX5	0.354415	0.00413896
E2	20	SPX5	0.363434	0.0131705
E2	21	SPX5	0.377515	0.0272648
E2	22	SPX5	0.404203	0.0539661
E2	23	SPX5	0.458232	0.108008
E2	24	SPX5	0.553846	0.203635
E2	25	SPX5	0.724866	0.374668
E2	26	SPX5	0.987499	0.637314
E2	27	SPX5	1.35327	1.0031
E2	28	SPX5	1.71216	1.36201
E2	29	SPX5	1.952	1.60185
E2	30	SPX5	2.11819	1.76806
E2	31	SPX5	2.25287	1.90275
E2	32	SPX5	2.35124	2.00113
E2	33	SPX5	2.43502	2.08493
[truncated: 1,847 more rows]

## Sheet: BioGroup Analysis Result
Block Type	96alum
Chemistry	SYBR_GREEN
Experiment File Name	D:\ShuJu\LZM\spx 5-8 iaa lp.eds
Experiment Run End Time	2023-08-17 02:37:08 AM CST
Instrument Type	sds7500
Passive Reference	ROX
Biogroup Name	Target Name	Task	RQ	RQ Min	RQ Max	Cт Mean	ΔCт Mean	ΔCт SE	ΔΔCт
Analysis Type	Singleplex
Endogenous Control	SPX5
RQ Min/Max Confidence Level	95.0
Reference Biogroup Name

## Sheet: Technical Analysis Result
Block Type	96alum
Chemistry	SYBR_GREEN
Experiment File Name	D:\ShuJu\LZM\spx 5-8 iaa lp.eds
Experiment Run End Time	2023-08-17 02:37:08 AM CST
Instrument Type	sds7500
Passive Reference	ROX
Sample Name	Target Name	Task	RQ	RQ Min	RQ Max	Cт Mean	ΔCт Mean	ΔCт SE	ΔΔCт
0d	SPX6	UNKNOWN	1	0.700033	1.42851	31.5383	5.9217	0.185311	0
0d	SPX7	UNKNOWN	1	0.693641	1.44167	27.8442	2.22764	0.190077	0
0d	SPX8	UNKNOWN	1			35.7037	10.0871		0
1d lp	SPX6	UNKNOWN	0.68694	0.473754	0.996056	32.3761	6.46345	0.193068	0.541745
1d lp	SPX7	UNKNOWN	0.686491	0.489355	0.963043	28.683	2.77032	0.175894	0.542687
1d lp	SPX8	UNKNOWN
1d lp+iaa	SPX6	UNKNOWN	4.06716	2.37061	6.97785	30.1108	3.89768	0.280489	-2.02402
1d lp+iaa	SPX7	UNKNOWN	1.20707	0.951814	1.53077	28.1692	1.95613	0.123451	-0.271507
1d lp+iaa	SPX8	UNKNOWN
5d lp	SPX6	UNKNOWN	2.43048	1.51772	3.89216	28.5405	4.64046	0.244677	-1.28124
5d lp	SPX7	UNKNOWN	0.498663	0.366466	0.67855	27.1315	3.2315	0.160057	1.00386
5d lp	SPX8	UNKNOWN
5d lp+iaa	SPX6	UNKNOWN	3.25996	1.85433	5.7311	28.4346	4.21684	0.293165	-1.70486
5d lp+iaa	SPX7	UNKNOWN	0.464474	0.29852	0.722685	27.5518	3.33397	0.229707	1.10633
5d lp+iaa	SPX8	UNKNOWN	0.189972	0.0768501	0.46961	36.701	12.4832	0.410273	2.39614
10d lp	SPX6	UNKNOWN	0.122972	0.0762317	0.198371	29.8661	8.9453	0.248472	3.0236
10d lp	SPX7	UNKNOWN	0.0597796	0.0509344	0.0701607	27.2126	6.29184	0.0832041	4.0642
10d lp	SPX8	UNKNOWN
10d lp+iaa	SPX6	UNKNOWN	0.158955	0.14262	0.17716	28.2757	8.57501	0.0563447	2.65331
10d lp+iaa	SPX7	UNKNOWN	0.0330743	0.0248276	0.0440603	26.8465	7.14578	0.149028	4.91814
10d lp+iaa	SPX8	UNKNOWN	0.0217211			35.3125	15.6119		5.52476
5d lp+iaa	ACTIN	UNKNOWN				20.9595	-3.25833	0.0427732
10d lp	ACTIN	UNKNOWN				20.6242	-0.296586	0.0655962
10d lp+iaa	ACTIN	UNKNOWN				20.6808	0.98009	0.0541347
Analysis Type	Singleplex
Endogenous Control	SPX5
RQ Min/Max Confidence Level	95.0
Reference Sample	0d
