# Supplementary material for: Genome-wide identification and characterization of SPXdomain-containing genes family in eggplant
Source: PeerJ journal article supplement (doi:10.7717/peerj.17341), 2024-05-28
Supplement: 16SPX_IAA+LP.zip [file 9-12 spx iaa +lp.xls]

## Sheet: Sample Setup
Block Type	96alum
Chemistry	SYBR_GREEN
Experiment File Name	D:\ShuJu\LZM\spx9-12 iaa=lp.eds
Experiment Run End Time	2023-08-17 06:04:16 AM CST
Instrument Type	sds7500
Passive Reference	ROX
Well	Sample Name	Sample Color	Biogroup Name	Biogroup Color	Target Name	Target Color	Task	Reporter	Quencher	Comments
A1	0d	RGB(132,193,241)			SPX9	RGB(139,189,249)	UNKNOWN	SYBR	None
A2	0d	RGB(132,193,241)			SPX9	RGB(139,189,249)	UNKNOWN	SYBR	None
A3	0d	RGB(132,193,241)			SPX9	RGB(139,189,249)	UNKNOWN	SYBR	None
A4	0d	RGB(132,193,241)			SPX10	RGB(208,243,98)	UNKNOWN	SYBR	None
A5	0d	RGB(132,193,241)			SPX10	RGB(208,243,98)	UNKNOWN	SYBR	None
A6	0d	RGB(132,193,241)			SPX10	RGB(208,243,98)	UNKNOWN	SYBR	None
A7	0d	RGB(132,193,241)			SPX11	RGB(244,165,230)	UNKNOWN	SYBR	None
A8	0d	RGB(132,193,241)			SPX11	RGB(244,165,230)	UNKNOWN	SYBR	None
A9	0d	RGB(132,193,241)			SPX11	RGB(244,165,230)	UNKNOWN	SYBR	None
A10	0d	RGB(132,193,241)			SPX12	RGB(255,191,168)	UNKNOWN	SYBR	None
A11	0d	RGB(132,193,241)			SPX12	RGB(255,191,168)	UNKNOWN	SYBR	None
A12	0d	RGB(132,193,241)			SPX12	RGB(255,191,168)	UNKNOWN	SYBR	None
B1	1d lp	RGB(168,255,222)			SPX9	RGB(139,189,249)	UNKNOWN	SYBR	None
B2	1d lp	RGB(168,255,222)			SPX9	RGB(139,189,249)	UNKNOWN	SYBR	None
B3	1d lp	RGB(168,255,222)			SPX9	RGB(139,189,249)	UNKNOWN	SYBR	None
B4	1d lp	RGB(168,255,222)			SPX10	RGB(208,243,98)	UNKNOWN	SYBR	None
B5	1d lp	RGB(168,255,222)			SPX10	RGB(208,243,98)	UNKNOWN	SYBR	None
B6	1d lp	RGB(168,255,222)			SPX10	RGB(208,243,98)	UNKNOWN	SYBR	None
B7	1d lp	RGB(168,255,222)			SPX11	RGB(244,165,230)	UNKNOWN	SYBR	None
B8	1d lp	RGB(168,255,222)			SPX11	RGB(244,165,230)	UNKNOWN	SYBR	None
B9	1d lp	RGB(168,255,222)			SPX11	RGB(244,165,230)	UNKNOWN	SYBR	None
B10	1d lp	RGB(168,255,222)			SPX12	RGB(255,191,168)	UNKNOWN	SYBR	None
B11	1d lp	RGB(168,255,222)			SPX12	RGB(255,191,168)	UNKNOWN	SYBR	None
B12	1d lp	RGB(168,255,222)			SPX12	RGB(255,191,168)	UNKNOWN	SYBR	None
C1	1dlp+iaa	RGB(223,221,142)			SPX9	RGB(139,189,249)	UNKNOWN	SYBR	None
C2	1dlp+iaa	RGB(223,221,142)			SPX9	RGB(139,189,249)	UNKNOWN	SYBR	None
C3	1dlp+iaa	RGB(223,221,142)			SPX9	RGB(139,189,249)	UNKNOWN	SYBR	None
C4	1dlp+iaa	RGB(223,221,142)			SPX10	RGB(208,243,98)	UNKNOWN	SYBR	None
C5	1dlp+iaa	RGB(223,221,142)			SPX10	RGB(208,243,98)	UNKNOWN	SYBR	None
C6	1dlp+iaa	RGB(223,221,142)			SPX10	RGB(208,243,98)	UNKNOWN	SYBR	None
C7	1dlp+iaa	RGB(223,221,142)			SPX11	RGB(244,165,230)	UNKNOWN	SYBR	None
C8	1dlp+iaa	RGB(223,221,142)			SPX11	RGB(244,165,230)	UNKNOWN	SYBR	None
C9	1dlp+iaa	RGB(223,221,142)			SPX11	RGB(244,165,230)	UNKNOWN	SYBR	None
C10	1dlp+iaa	RGB(223,221,142)			SPX12	RGB(255,191,168)	UNKNOWN	SYBR	None
C11	1dlp+iaa	RGB(223,221,142)			SPX12	RGB(255,191,168)	UNKNOWN	SYBR	None
C12	1dlp+iaa	RGB(223,221,142)			SPX12	RGB(255,191,168)	UNKNOWN	SYBR	None
D1	5d lp	RGB(247,255,168)			SPX9	RGB(139,189,249)	UNKNOWN	SYBR	None
D2	5d lp	RGB(247,255,168)			SPX9	RGB(139,189,249)	UNKNOWN	SYBR	None
D3	5d lp	RGB(247,255,168)			SPX9	RGB(139,189,249)	UNKNOWN	SYBR	None
D4	5d lp	RGB(247,255,168)			SPX10	RGB(208,243,98)	UNKNOWN	SYBR	None
D5	5d lp	RGB(247,255,168)			SPX10	RGB(208,243,98)	UNKNOWN	SYBR	None
D6	5d lp	RGB(247,255,168)			SPX10	RGB(208,243,98)	UNKNOWN	SYBR	None
D7	5d lp	RGB(247,255,168)			SPX11	RGB(244,165,230)	UNKNOWN	SYBR	None
D8	5d lp	RGB(247,255,168)			SPX11	RGB(244,165,230)	UNKNOWN	SYBR	None
D9	5d lp	RGB(247,255,168)			SPX11	RGB(244,165,230)	UNKNOWN	SYBR	None
D10	5d lp	RGB(247,255,168)			SPX12	RGB(255,191,168)	UNKNOWN	SYBR	None
D11	5d lp	RGB(247,255,168)			SPX12	RGB(255,191,168)	UNKNOWN	SYBR	None
D12	5d lp	RGB(247,255,168)			SPX12	RGB(255,191,168)	UNKNOWN	SYBR	None
E1	5d lp+iaa	RGB(253,138,88)			SPX9	RGB(139,189,249)	UNKNOWN	SYBR	None
E2	5d lp+iaa	RGB(253,138,88)			SPX9	RGB(139,189,249)	UNKNOWN	SYBR	None
E3	5d lp+iaa	RGB(253,138,88)			SPX9	RGB(139,189,249)	UNKNOWN	SYBR	None
E4	5d lp+iaa	RGB(253,138,88)			SPX10	RGB(208,243,98)	UNKNOWN	SYBR	None
E5	5d lp+iaa	RGB(253,138,88)			SPX10	RGB(208,243,98)	UNKNOWN	SYBR	None
E6	5d lp+iaa	RGB(253,138,88)			SPX10	RGB(208,243,98)	UNKNOWN	SYBR	None
E7	5d lp+iaa	RGB(253,138,88)			SPX11	RGB(244,165,230)	UNKNOWN	SYBR	None
E8	5d lp+iaa	RGB(253,138,88)			SPX11	RGB(244,165,230)	UNKNOWN	SYBR	None
E9	5d lp+iaa	RGB(253,138,88)			SPX11	RGB(244,165,230)	UNKNOWN	SYBR	None
E10	5d lp+iaa	RGB(253,138,88)			SPX12	RGB(255,191,168)	UNKNOWN	SYBR	None
E11	5d lp+iaa	RGB(253,138,88)			SPX12	RGB(255,191,168)	UNKNOWN	SYBR	None
E12	5d lp+iaa	RGB(253,138,88)			SPX12	RGB(255,191,168)	UNKNOWN	SYBR	None
F1	10d lp	RGB(213,244,165)			SPX9	RGB(139,189,249)	UNKNOWN	SYBR	None
F2	10d lp	RGB(213,244,165)			SPX9	RGB(139,189,249)	UNKNOWN	SYBR	None
F3	10d lp	RGB(213,244,165)			SPX9	RGB(139,189,249)	UNKNOWN	SYBR	None
F4	10d lp	RGB(213,244,165)			SPX10	RGB(208,243,98)	UNKNOWN	SYBR	None
F5	10d lp	RGB(213,244,165)			SPX10	RGB(208,243,98)	UNKNOWN	SYBR	None
F6	10d lp	RGB(213,244,165)			SPX10	RGB(208,243,98)	UNKNOWN	SYBR	None
F7	10d lp	RGB(213,244,165)			SPX11	RGB(244,165,230)	UNKNOWN	SYBR	None
F8	10d lp	RGB(213,244,165)			SPX11	RGB(244,165,230)	UNKNOWN	SYBR	None
F9	10d lp	RGB(213,244,165)			SPX11	RGB(244,165,230)	UNKNOWN	SYBR	None
F10	10d lp	RGB(213,244,165)			SPX12	RGB(255,191,168)	UNKNOWN	SYBR	None
F11	10d lp	RGB(213,244,165)			SPX12	RGB(255,191,168)	UNKNOWN	SYBR	None
F12	10d lp	RGB(213,244,165)			SPX12	RGB(255,191,168)	UNKNOWN	SYBR	None
G1	10d lp+iaa	RGB(96,255,160)			SPX9	RGB(139,189,249)	UNKNOWN	SYBR	None
G2	10d lp+iaa	RGB(96,255,160)			SPX9	RGB(139,189,249)	UNKNOWN	SYBR	None
G3	10d lp+iaa	RGB(96,255,160)			SPX9	RGB(139,189,249)	UNKNOWN	SYBR	None
G4	10d lp+iaa	RGB(96,255,160)			SPX10	RGB(208,243,98)	UNKNOWN	SYBR	None
G5	10d lp+iaa	RGB(96,255,160)			SPX10	RGB(208,243,98)	UNKNOWN	SYBR	None
G6	10d lp+iaa	RGB(96,255,160)			SPX10	RGB(208,243,98)	UNKNOWN	SYBR	None
G7	10d lp+iaa	RGB(96,255,160)			SPX11	RGB(244,165,230)	UNKNOWN	SYBR	None
G8	10d lp+iaa	RGB(96,255,160)			SPX11	RGB(244,165,230)	UNKNOWN	SYBR	None
G9	10d lp+iaa	RGB(96,255,160)			SPX11	RGB(244,165,230)	UNKNOWN	SYBR	None
G10	10d lp+iaa	RGB(96,255,160)			SPX12	RGB(255,191,168)	UNKNOWN	SYBR	None
G11	10d lp+iaa	RGB(96,255,160)			SPX12	RGB(255,191,168)	UNKNOWN	SYBR	None
G12	10d lp+iaa	RGB(96,255,160)			SPX12	RGB(255,191,168)	UNKNOWN	SYBR	None
H1	0d	RGB(132,193,241)			SPX8	RGB(243,124,98)	UNKNOWN	SYBR	None
H2	0d	RGB(132,193,241)			SPX8	RGB(243,124,98)	UNKNOWN	SYBR	None
H3	0d	RGB(132,193,241)			SPX8	RGB(243,124,98)	UNKNOWN	SYBR	None
H4	1d lp	RGB(168,255,222)			SPX8	RGB(243,124,98)	UNKNOWN	SYBR	None
H5	1d lp	RGB(168,255,222)			SPX8	RGB(243,124,98)	UNKNOWN	SYBR	None
H6	1d lp	RGB(168,255,222)			SPX8	RGB(243,124,98)	UNKNOWN	SYBR	None
H7	1dlp+iaa	RGB(223,221,142)			SPX8	RGB(243,124,98)	UNKNOWN	SYBR	None
H8	1dlp+iaa	RGB(223,221,142)			SPX8	RGB(243,124,98)	UNKNOWN	SYBR	None
H9	1dlp+iaa	RGB(223,221,142)			SPX8	RGB(243,124,98)	UNKNOWN	SYBR	None
H10
H11
H12

## Sheet: Results
Block Type	96alum
Chemistry	SYBR_GREEN
Experiment File Name	D:\ShuJu\LZM\spx9-12 iaa=lp.eds
Experiment Run End Time	2023-08-17 06:04:16 AM CST
Instrument Type	sds7500
Passive Reference	ROX
Well	Sample Name	Target Name	Task	Reporter	Quencher	RQ	RQ Min	RQ Max	Cт	Cт Mean	Cт SD	ΔCт	ΔCт Mean	ΔCт SE	HK Control ΔCт Mean	HK Control ΔCт SE	ΔΔCт	Automatic Ct Threshold	Ct Threshold	Automatic Baseline	Baseline Start	Baseline End	Efficiency	Tm1	Tm2	Tm3	Comments	HIGHSD	NOAMP	EXPFAIL
A1	0d	SPX9	UNKNOWN	SYBR	None				30.9599	29.2798	1.45702							TRUE	0.246686	TRUE	3	26	1	80.7606				Y	N	N
A2	0d	SPX9	UNKNOWN	SYBR	None				28.515	29.2798	1.45702							TRUE	0.246686	TRUE	3	23	1	80.7606				Y	N	N
A3	0d	SPX9	UNKNOWN	SYBR	None				28.3644	29.2798	1.45702							TRUE	0.246686	TRUE	3	22	1	80.9509				Y	N	N
A4	0d	SPX10	UNKNOWN	SYBR	None	1	0.195245	5.12176	28.826	29.0525	0.196148		-0.227267	0.848798			0	TRUE	0.201422	TRUE	3	24	1	79.048				N	N	N
A5	0d	SPX10	UNKNOWN	SYBR	None	1	0.195245	5.12176	29.1641	29.0525	0.196148		-0.227267	0.848798			0	TRUE	0.201422	TRUE	3	24	1	79.048				N	N	N
A6	0d	SPX10	UNKNOWN	SYBR	None	1	0.195245	5.12176	29.1674	29.0525	0.196148		-0.227267	0.848798			0	TRUE	0.201422	TRUE	3	24	1	79.048				N	N	N
A7	0d	SPX11	UNKNOWN	SYBR	None	1	0.168983	5.91776	33.9534	33.2787	0.661563		3.99896	0.923862			0	TRUE	0.080226	TRUE	3	29	1	79.2383				Y	N	N
A8	0d	SPX11	UNKNOWN	SYBR	None	1	0.168983	5.91776	32.6311	33.2787	0.661563		3.99896	0.923862			0	TRUE	0.080226	TRUE	3	29	1	79.2383				Y	N	N
A9	0d	SPX11	UNKNOWN	SYBR	None	1	0.168983	5.91776	33.2517	33.2787	0.661563		3.99896	0.923862			0	TRUE	0.080226	TRUE	3	29	1	79.2383				Y	N	N
A10	0d	SPX12	UNKNOWN	SYBR	None	1	0.197348	5.0672	25.8327	25.9488	0.101127		-3.33098	0.843233			0	TRUE	0.175985	TRUE	3	20	1	77.9063				N	N	N
A11	0d	SPX12	UNKNOWN	SYBR	None	1	0.197348	5.0672	26.0174	25.9488	0.101127		-3.33098	0.843233			0	TRUE	0.175985	TRUE	3	21	1	77.9063				N	N	N
A12	0d	SPX12	UNKNOWN	SYBR	None	1	0.197348	5.0672	25.9963	25.9488	0.101127		-3.33098	0.843233			0	TRUE	0.175985	TRUE	3	21	1	77.716				N	N	N
B1	1d lp	SPX9	UNKNOWN	SYBR	None				30.1431	30.0953	0.102433							TRUE	0.246686	TRUE	3	25	1	80.7606				N	N	N
B2	1d lp	SPX9	UNKNOWN	SYBR	None				29.9777	30.0953	0.102433							TRUE	0.246686	TRUE	3	25	1	80.9509				N	N	N
B3	1d lp	SPX9	UNKNOWN	SYBR	None				30.165	30.0953	0.102433							TRUE	0.246686	TRUE	3	25	1	81.1411				N	N	N
B4	1d lp	SPX10	UNKNOWN	SYBR	None	0.929932	0.530649	1.62965	29.6185	29.9728	0.494414		-0.122464	0.291512			0.104803	TRUE	0.201422	TRUE	3	24	1	79.2383				N	N	N
B5	1d lp	SPX10	UNKNOWN	SYBR	None	0.929932	0.530649	1.62965	30.5376	29.9728	0.494414		-0.122464	0.291512			0.104803	TRUE	0.201422	TRUE	3	26	1	79.2383				N	N	N
B6	1d lp	SPX10	UNKNOWN	SYBR	None	0.929932	0.530649	1.62965	29.7623	29.9728	0.494414		-0.122464	0.291512			0.104803	TRUE	0.201422	TRUE	3	24	1	79.2383				N	N	N
B7	1d lp	SPX11	UNKNOWN	SYBR	None	1.20827	0.221496	6.59117	35.361	33.8213	1.52346		3.72601	0.881555			-0.272945	TRUE	0.080226	TRUE	3	31	1	79.4286				Y	N	N
B8	1d lp	SPX11	UNKNOWN	SYBR	None	1.20827	0.221496	6.59117	32.3146	33.8213	1.52346		3.72601	0.881555			-0.272945	TRUE	0.080226	TRUE	3	28	1	79.2383				Y	N	N
B9	1d lp	SPX11	UNKNOWN	SYBR	None	1.20827	0.221496	6.59117	33.7883	33.8213	1.52346		3.72601	0.881555			-0.272945	TRUE	0.080226	TRUE	3	30	1	79.4286				Y	N	N
B10	1d lp	SPX12	UNKNOWN	SYBR	None	1.02795	0.643054	1.64323	26.2523	26.7245	0.409573		-3.37075	0.24375			-0.0397714	TRUE	0.175985	TRUE	3	20	1	78.2868				N	N	N
B11	1d lp	SPX12	UNKNOWN	SYBR	None	1.02795	0.643054	1.64323	26.9382	26.7245	0.409573		-3.37075	0.24375			-0.0397714	TRUE	0.175985	TRUE	3	22	1	78.0966				N	N	N
B12	1d lp	SPX12	UNKNOWN	SYBR	None	1.02795	0.643054	1.64323	26.983	26.7245	0.409573		-3.37075	0.24375			-0.0397714	TRUE	0.175985	TRUE	3	22	1	77.716				N	N	N
C1	1dlp+iaa	SPX9	UNKNOWN	SYBR	None				29.5572	29.4599	0.270184							TRUE	0.246686	TRUE	3	25	1	81.1411				N	N	N
C2	1dlp+iaa	SPX9	UNKNOWN	SYBR	None				29.6679	29.4599	0.270184							TRUE	0.246686	TRUE	3	24	1	81.3314				N	N	N
C3	1dlp+iaa	SPX9	UNKNOWN	SYBR	None				29.1545	29.4599	0.270184							TRUE	0.246686	TRUE	3	23	1	81.3314				N	N	N
C4	1dlp+iaa	SPX10	UNKNOWN	SYBR	None	1.32952	0.977113	1.80903	28.7545	28.8217	0.0618703		-0.638175	0.160029			-0.410908	TRUE	0.201422	TRUE	3	24	1	79.4286				N	N	N
C5	1dlp+iaa	SPX10	UNKNOWN	SYBR	None	1.32952	0.977113	1.80903	28.8762	28.8217	0.0618703		-0.638175	0.160029			-0.410908	TRUE	0.201422	TRUE	3	24	1	79.4286				N	N	N
C6	1dlp+iaa	SPX10	UNKNOWN	SYBR	None	1.32952	0.977113	1.80903	28.8345	28.8217	0.0618703		-0.638175	0.160029			-0.410908	TRUE	0.201422	TRUE	3	23	1	79.4286				N	N	N
C7	1dlp+iaa	SPX11	UNKNOWN	SYBR	None	2.82261	0.833239	9.56166	32.8307	31.9618	1.06434		2.50192	0.633987			-1.49703	TRUE	0.080226	TRUE	3	29	1	79.6189				Y	N	N
C8	1dlp+iaa	SPX11	UNKNOWN	SYBR	None	2.82261	0.833239	9.56166	32.2802	31.9618	1.06434		2.50192	0.633987			-1.49703	TRUE	0.080226	TRUE	3	28	1	79.6189				Y	N	N
C9	1dlp+iaa	SPX11	UNKNOWN	SYBR	None	2.82261	0.833239	9.56166	30.7746	31.9618	1.06434		2.50192	0.633987			-1.49703	TRUE	0.080226	TRUE	3	26	1	79.4286				Y	N	N
C10	1dlp+iaa	SPX12	UNKNOWN	SYBR	None	2.23238	1.3931	3.57731	24.9377	24.9703	0.327272		-4.48956	0.245021			-1.15859	TRUE	0.175985	TRUE	3	20	1	78.4771				N	N	N
C11	1dlp+iaa	SPX12	UNKNOWN	SYBR	None	2.23238	1.3931	3.57731	24.6606	24.9703	0.327272		-4.48956	0.245021			-1.15859	TRUE	0.175985	TRUE	3	19	1	78.0966				N	N	N
C12	1dlp+iaa	SPX12	UNKNOWN	SYBR	None	2.23238	1.3931	3.57731	25.3127	24.9703	0.327272		-4.48956	0.245021			-1.15859	TRUE	0.175985	TRUE	3	20	1	77.9063				N	N	N
D1	5d lp	SPX9	UNKNOWN	SYBR	None				28.214	28.1802	0.203898							TRUE	0.246686	TRUE	3	23	1	81.3314				N	N	N
D2	5d lp	SPX9	UNKNOWN	SYBR	None				27.9616	28.1802	0.203898							TRUE	0.246686	TRUE	3	22	1	81.3314				N	N	N
D3	5d lp	SPX9	UNKNOWN	SYBR	None				28.3651	28.1802	0.203898							TRUE	0.246686	TRUE	3	23	1	81.5217				N	N	N
D4	5d lp	SPX10	UNKNOWN	SYBR	None	0.639243	0.344619	1.18575	28.3896	28.5985	0.517333		0.418297	0.321044			0.645564	TRUE	0.201422	TRUE	3	23	1	79.4286				Y	N	N
D5	5d lp	SPX10	UNKNOWN	SYBR	None	0.639243	0.344619	1.18575	29.1877	28.5985	0.517333		0.418297	0.321044			0.645564	TRUE	0.201422	TRUE	3	24	1	79.6189				Y	N	N
D6	5d lp	SPX10	UNKNOWN	SYBR	None	0.639243	0.344619	1.18575	28.2183	28.5985	0.517333		0.418297	0.321044			0.645564	TRUE	0.201422	TRUE	3	23	1	79.4286				Y	N	N
D7	5d lp	SPX11	UNKNOWN	SYBR	None	2.02429	1.18376	3.46164	31.1104	31.1618	0.437712		2.98154	0.278787			-1.01742	TRUE	0.080226	TRUE	3	27	1	79.6189				N	N	N
D8	5d lp	SPX11	UNKNOWN	SYBR	None	2.02429	1.18376	3.46164	31.6229	31.1618	0.437712		2.98154	0.278787			-1.01742	TRUE	0.080226	TRUE	3	27	1	79.6189				N	N	N
D9	5d lp	SPX11	UNKNOWN	SYBR	None	2.02429	1.18376	3.46164	30.752	31.1618	0.437712		2.98154	0.278787			-1.01742	TRUE	0.080226	TRUE	3	27	1	79.6189				N	N	N
D10	5d lp	SPX12	UNKNOWN	SYBR	None	1.51432	1.16572	1.96717	24.252	24.2506	0.117774		-3.92965	0.135947			-0.598668	TRUE	0.175985	TRUE	3	19	1	78.4771				N	N	N
D11	5d lp	SPX12	UNKNOWN	SYBR	None	1.51432	1.16572	1.96717	24.1321	24.2506	0.117774		-3.92965	0.135947			-0.598668	TRUE	0.175985	TRUE	3	20	1	78.2868				N	N	N
D12	5d lp	SPX12	UNKNOWN	SYBR	None	1.51432	1.16572	1.96717	24.3677	24.2506	0.117774		-3.92965	0.135947			-0.598668	TRUE	0.175985	TRUE	3	20	1	77.9063				N	N	N
E1	5d lp+iaa	SPX9	UNKNOWN	SYBR	None				28.4292	28.5911	0.14345							TRUE	0.246686	TRUE	3	23	1	81.3314				N	N	N
E2	5d lp+iaa	SPX9	UNKNOWN	SYBR	None				28.7024	28.5911	0.14345							TRUE	0.246686	TRUE	3	24	1	81.5217				N	N	N
E3	5d lp+iaa	SPX9	UNKNOWN	SYBR	None				28.6417	28.5911	0.14345							TRUE	0.246686	TRUE	3	23	1	81.5217				N	N	N
E4	5d lp+iaa	SPX10	UNKNOWN	SYBR	None	0.860073	0.732302	1.01014	28.5956	28.5813	0.0193073		-0.00979869	0.0835678			0.217468	TRUE	0.201422	TRUE	3	24	1	79.4286				N	N	N
E5	5d lp+iaa	SPX10	UNKNOWN	SYBR	None	0.860073	0.732302	1.01014	28.5889	28.5813	0.0193073		-0.00979869	0.0835678			0.217468	TRUE	0.201422	TRUE	3	24	1	79.6189				N	N	N
E6	5d lp+iaa	SPX10	UNKNOWN	SYBR	None	0.860073	0.732302	1.01014	28.5593	28.5813	0.0193073		-0.00979869	0.0835678			0.217468	TRUE	0.201422	TRUE	3	24	1	79.4286				N	N	N
E7	5d lp+iaa	SPX11	UNKNOWN	SYBR	None	2.50348	1.34219	4.66953	31.6146	31.2661	0.542396		2.67502	0.323919			-1.32393	TRUE	0.080226	TRUE	3	27	1	79.8091				Y	N	N
E8	5d lp+iaa	SPX11	UNKNOWN	SYBR	None	2.50348	1.34219	4.66953	31.5425	31.2661	0.542396		2.67502	0.323919			-1.32393	TRUE	0.080226	TRUE	3	27	1	79.6189				Y	N	N
E9	5d lp+iaa	SPX11	UNKNOWN	SYBR	None	2.50348	1.34219	4.66953	30.6412	31.2661	0.542396		2.67502	0.323919			-1.32393	TRUE	0.080226	TRUE	3	27	1	79.6189				Y	N	N
E10	5d lp+iaa	SPX12	UNKNOWN	SYBR	None	2.62651	0.751728	9.1769	22.5878	23.8669	1.11677		-4.72412	0.650063			-1.39314	TRUE	0.175985	TRUE	3	17	1	78.4771				Y	N	N
E11	5d lp+iaa	SPX12	UNKNOWN	SYBR	None	2.62651	0.751728	9.1769	24.6478	23.8669	1.11677		-4.72412	0.650063			-1.39314	TRUE	0.175985	TRUE	3	20	1	78.2868				Y	N	N
E12	5d lp+iaa	SPX12	UNKNOWN	SYBR	None	2.62651	0.751728	9.1769	24.3653	23.8669	1.11677		-4.72412	0.650063			-1.39314	TRUE	0.175985	TRUE	3	19	1	77.9063				Y	N	N
F1	10d lp	SPX9	UNKNOWN	SYBR	None				27.2114	27.0327	0.155282							TRUE	0.246686	TRUE	3	22	1	80.9509				N	N	N
F2	10d lp	SPX9	UNKNOWN	SYBR	None				26.956	27.0327	0.155282							TRUE	0.246686	TRUE	3	22	1	81.1411				N	N	N
F3	10d lp	SPX9	UNKNOWN	SYBR	None				26.9307	27.0327	0.155282							TRUE	0.246686	TRUE	3	22	1	81.1411				N	N	N
F4	10d lp	SPX10	UNKNOWN	SYBR	None	0.475347	0.395106	0.571882	27.8101	27.8784	0.059807		0.845681	0.0960718			1.07295	TRUE	0.201422	TRUE	3	23	1	79.4286				N	N	N
F5	10d lp	SPX10	UNKNOWN	SYBR	None	0.475347	0.395106	0.571882	27.9212	27.8784	0.059807		0.845681	0.0960718			1.07295	TRUE	0.201422	TRUE	3	23	1	79.4286				N	N	N
F6	10d lp	SPX10	UNKNOWN	SYBR	None	0.475347	0.395106	0.571882	27.9039	27.8784	0.059807		0.845681	0.0960718			1.07295	TRUE	0.201422	TRUE	3	23	1	79.4286				N	N	N
F7	10d lp	SPX11	UNKNOWN	SYBR	None	0.511752	0.233828	1.12001	31.4602	31.9982	0.687619		4.96544	0.406994			0.966482	TRUE	0.080226	TRUE	3	27	1	79.6189				Y	N	N
F8	10d lp	SPX11	UNKNOWN	SYBR	None	0.511752	0.233828	1.12001	31.7614	31.9982	0.687619		4.96544	0.406994			0.966482	TRUE	0.080226	TRUE	3	27	1	79.6189				Y	N	N
F9	10d lp	SPX11	UNKNOWN	SYBR	None	0.511752	0.233828	1.12001	32.7729	31.9982	0.687619		4.96544	0.406994			0.966482	TRUE	0.080226	TRUE	3	29	1	79.4286				Y	N	N
F10	10d lp	SPX12	UNKNOWN	SYBR	None	0.578074	0.470271	0.710588	24.3772	24.4924	0.101942		-2.5403	0.107245			0.790675	TRUE	0.175985	TRUE	3	19	1	78.2868				N	N	N
F11	10d lp	SPX12	UNKNOWN	SYBR	None	0.578074	0.470271	0.710588	24.571	24.4924	0.101942		-2.5403	0.107245			0.790675	TRUE	0.175985	TRUE	3	19	1	78.0966				N	N	N
F12	10d lp	SPX12	UNKNOWN	SYBR	None	0.578074	0.470271	0.710588	24.5291	24.4924	0.101942		-2.5403	0.107245			0.790675	TRUE	0.175985	TRUE	3	20	1	77.9063				N	N	N
G1	10d lp+iaa	SPX9	UNKNOWN	SYBR	None				26.9795	26.8102	0.215523							TRUE	0.246686	TRUE	3	22	1	80.9509				N	N	N
G2	10d lp+iaa	SPX9	UNKNOWN	SYBR	None				26.8836	26.8102	0.215523							TRUE	0.246686	TRUE	3	22	1	81.1411				N	N	N
G3	10d lp+iaa	SPX9	UNKNOWN	SYBR	None				26.5676	26.8102	0.215523							TRUE	0.246686	TRUE	3	21	1	80.9509				N	N	N
G4	10d lp+iaa	SPX10	UNKNOWN	SYBR	None	0.389581	0.293093	0.517833	28.0787	27.943	0.138384		1.13274	0.147874			1.36001	TRUE	0.201422	TRUE	3	23	1	79.2383				N	N	N
G5	10d lp+iaa	SPX10	UNKNOWN	SYBR	None	0.389581	0.293093	0.517833	27.8021	27.943	0.138384		1.13274	0.147874			1.36001	TRUE	0.201422	TRUE	3	23	1	79.2383				N	N	N
G6	10d lp+iaa	SPX10	UNKNOWN	SYBR	None	0.389581	0.293093	0.517833	27.948	27.943	0.138384		1.13274	0.147874			1.36001	TRUE	0.201422	TRUE	3	22	1	79.2383				N	N	N
G7	10d lp+iaa	SPX11	UNKNOWN	SYBR	None	1.41385	0.856075	2.33506	30.2565	30.3095	0.396796		3.49932	0.260702			-0.499634	TRUE	0.080226	TRUE	3	26	1	79.2383				N	N	N
G8	10d lp+iaa	SPX11	UNKNOWN	SYBR	None	1.41385	0.856075	2.33506	29.942	30.3095	0.396796		3.49932	0.260702			-0.499634	TRUE	0.080226	TRUE	3	26	1	79.2383				N	N	N
G9	10d lp+iaa	SPX11	UNKNOWN	SYBR	None	1.41385	0.856075	2.33506	30.7302	30.3095	0.396796		3.49932	0.260702			-0.499634	TRUE	0.080226	TRUE	3	27	1	79.2383				N	N	N
G10	10d lp+iaa	SPX12	UNKNOWN	SYBR	None	1.03082	0.784546	1.3544	23.5249	23.4354	0.117992		-3.37477	0.141859			-0.043794	TRUE	0.175985	TRUE	3	18	1	78.2868				N	N	N
G11	10d lp+iaa	SPX12	UNKNOWN	SYBR	None	1.03082	0.784546	1.3544	23.4798	23.4354	0.117992		-3.37477	0.141859			-0.043794	TRUE	0.175985	TRUE	3	18	1	78.0966				N	N	N
G12	10d lp+iaa	SPX12	UNKNOWN	SYBR	None	1.03082	0.784546	1.3544	23.3017	23.4354	0.117992		-3.37477	0.141859			-0.043794	TRUE	0.175985	TRUE	3	18	1	77.716				N	N	N
H1	0d	SPX8	UNKNOWN	SYBR	None	1	0.134245	7.44905	35.306	35.8912	1.0693		6.61146	1.04344			0	TRUE	0.0112503	TRUE	3	34	1	79.8091				Y	N	N
H2	0d	SPX8	UNKNOWN	SYBR	None	1	0.134245	7.44905	37.1254	35.8912	1.0693		6.61146	1.04344			0	TRUE	0.0112503	TRUE	3	35	1	79.9994				Y	N	N
H3	0d	SPX8	UNKNOWN	SYBR	None	1	0.134245	7.44905	35.2422	35.8912	1.0693		6.61146	1.04344			0	TRUE	0.0112503	TRUE	3	34	1	79.9994				Y	N	N
H4	1d lp	SPX8	UNKNOWN	SYBR	None				Undetermined									TRUE	0.0112503	TRUE	3	39	1	62.1126				N	Y	Y
H5	1d lp	SPX8	UNKNOWN	SYBR	None				Undetermined									TRUE	0.0112503	TRUE	3	39	1	62.3029				N	Y	Y
H6	1d lp	SPX8	UNKNOWN	SYBR	None				Undetermined									TRUE	0.0112503	TRUE	3	39	1	62.3029				N	Y	Y
H7	1dlp+iaa	SPX8	UNKNOWN	SYBR	None	0.970228	0.215872	4.36066	Undetermined	36.115	0.937885		6.65506	0.681284			0.0436039	TRUE	0.0112503	TRUE	3	39	1	62.1126				N	Y	Y
H8	1dlp+iaa	SPX8	UNKNOWN	SYBR	None	0.970228	0.215872	4.36066	36.7781	36.115	0.937885		6.65506	0.681284			0.0436039	TRUE	0.0112503	TRUE	3	35	1	79.9994				Y	N	N
H9	1dlp+iaa	SPX8	UNKNOWN	SYBR	None	0.970228	0.215872	4.36066	35.4518	36.115	0.937885		6.65506	0.681284			0.0436039	TRUE	0.0112503	TRUE	3	34	1	79.9994				Y	N	N
Analysis Type	Singleplex
Endogenous Control	SPX9
RQ Min/Max Confidence Level	95.0
Reference Sample	0d

## Sheet: Raw Data
Block Type	96alum
Chemistry	SYBR_GREEN
Experiment File Name	D:\ShuJu\LZM\spx9-12 iaa=lp.eds
Experiment Run End Time	2023-08-17 06:04:16 AM CST
Instrument Type	sds7500
Passive Reference	ROX
Well	Cycle	1	2	3	4	5
A1	1	22524	4743.94	13895.6	97450.9	2463.66
A2	1	37080.4	6313.92	15894.2	102926	2758.25
A3	1	32813.3	6913.51	18194	107208	2498.14
A4	1	35955.4	5604.88	17633	98973.5	2794.7
A5	1	31480.9	4748.81	18472.2	103025	3060.7
A6	1	49609.2	8751.18	25560.1	131952	5699.86
A7	1	50143.5	5442.86	19487.8	106912	3174.42
A8	1	176353	26672	67538.9	348985	16346
A9	1	43098	6319.08	19315.4	109438	3089.43
A10	1	30666.6	5436.99	19799.5	120267	3295.65
A11	1	32862.1	4978.46	20122	134364	2952.58
A12	1	34518.5	4974.32	18340.6	132199	2981.66
B1	1	40376.4	7240.07	19397.3	128649	3899.39
B2	1	44101.2	7405.11	19042.4	114768	2900.81
B3	1	34097.6	6167.41	19290.7	110053	2828.39
B4	1	29887.8	4736.91	19812.9	110179	2625.88
B5	1	29802.8	4420.78	22456.1	126707	3143.53
B6	1	24852.8	4050.89	21053.6	112667	1843.21
B7	1	28021.5	4291.19	20611.8	109362	2315.86
B8	1	109531	14791.7	63180.3	345770	7623.58
B9	1	34469.1	5465.84	19166.4	103413	2641.5
B10	1	39649.4	6513.45	21330.2	122249	2624.21
B11	1	44003.1	6810.44	23593.4	143972	4049.5
B12	1	47050.7	8728.73	23458.5	152461	6163.56
C1	1	45255.4	7797.78	20199.6	128694	4150.56
C2	1	48497.2	7838.58	26174.2	160854	3851.45
C3	1	37964	5488.51	19434.3	110906	2481.71
C4	1	31633.4	5017.45	21964	117392	3048.19
C5	1	29926.9	4352.98	20433.3	104412	2947.96
C6	1	28372.8	4450.55	22112.3	112626	2561.84
C7	1	33574.7	5005.11	21550.5	108035	2072.85
C8	1	33314.1	4935.26	21025.8	106883	2498.69
C9	1	34238.5	6755.46	20125.4	101995	2874.97
C10	1	31314.8	5714.48	20907.1	116338	2706.01
C11	1	33883	6231.82	23589.6	143043	2370.09
C12	1	44008.3	7225.21	22750	146488	3257.59
D1	1	51025.2	8810.79	22055.7	137043	3570.13
D2	1	40426.1	7067.21	21866.4	127515	2676.61
D3	1	41221.9	7876.94	22066.2	116405	3522.37
D4	1	32972.5	6066.89	24573.7	126110	4000.18
D5	1	29468.1	4734.58	21252.7	106583	2150.97
D6	1	38225.5	6449.22	24415.2	116845	4436.28
D7	1	27552.4	4387.22	21687.6	106966	2287.71
D8	1	29435.2	5663.54	22869.1	112973	2224.59
D9	1	42627.1	7791.04	21907.9	108017	4063.21
D10	1	39706.2	7049.31	22449.2	116995	3881.04
D11	1	44307.2	7818.58	26503.4	150456	3395.62
D12	1	170899	21459.8	31880.2	161866	7919.81
E1	1	50085.7	8044.86	20340.6	127430	4311.86
E2	1	53124.5	9151.38	22236.2	123991	4121.62
E3	1	72928.8	8949.81	22437	116785	4639.01
E4	1	36096	6077.02	26986.9	139928	3239.69
E5	1	27462.5	4461.98	21268.1	107486	2678.06
E6	1	29540.8	5101.65	24159.1	120186	3963.94
E7	1	37462.4	6076.58	22543.9	108488	4065.1
E8	1	35687.5	6383.16	24226	117577	3770.66
E9	1	34878.5	7692.67	25191.5	110920	2586.4
E10	1	37170.8	6473.95	21380.2	114864	3152.8
E11	1	66785.4	12876	28416.7	143573	7937.21
E12	1	61028.6	10445.7	24258.6	140392	5928.39
F1	1	50834.6	9666.83	23455.7	143599	7810.88
F2	1	55288.3	9415.56	22618.2	129462	4056.04
F3	1	36644.6	6600.75	21354.2	120310	2817.37
F4	1	35420.3	5982.82	25801.4	136555	3132.48
F5	1	27839.7	4337.05	20910.1	108758	2385.21
F6	1	56840.8	10285.3	28408.7	130114	6720.73
F7	1	28887.5	4626.74	22867.4	115549	3036.45
F8	1	30928.1	4756.94	22412	115120	2493.89
F9	1	31385.8	5196.34	20588.6	110403	3250.02
F10	1	32916.9	5645.23	21728.8	120355	3688.31
F11	1	32541.9	5225.63	23348.2	140228	2789.86
F12	1	55423.4	9798.73	23810.7	140841	6195.38
G1	1	49464.1	8463.29	20935.2	137838	3956.65
G2	1	62314.6	10824.4	24421.4	143575	3533.46
G3	1	40580	7221.36	18823	105832	3063.24
G4	1	32040	5345.67	24942.4	138700	2976.3
G5	1	27245.7	4397.9	19354.6	104729	2510.12
G6	1	29568.4	5178.34	21844.1	112182	2601.28
G7	1	29267.7	4930.62	21485.6	113113	2739.78
G8	1	37567.4	6409.48	23573.3	122680	3390.71
G9	1	35370.6	5351.06	20822.8	114231	2628.02
G10	1	37940	7474.16	21962.8	121061	2677.67
G11	1	88453.7	14775.2	28771.9	149969	9009.23
G12	1	42177.2	6430.54	21371.5	140630	3036.49
H1	1	59385.6	10051.9	24340.5	160717	8360.54
H2	1	45192.6	7699.19	24587.9	156968	4084.19
H3	1	37904.5	6932.66	22902.4	134212	5119.67
H4	1	38707.4	7202.48	26759.4	151221	3269.84
H5	1	30474	5280.5	21276.7	119533	2567.99
H6	1	38792.5	6747.93	25445.3	137898	3948.47
H7	1	32837.5	8334.3	26523.6	139676	2678.13
H8	1	35373.2	6419.48	22527.7	125827	2819.9
H9	1	33362.5	5771.01	22722.7	132112	2682.71
H10	1	36167.9	8222.48	5624.96	6720.33	3867.36
H11	1	39606.3	6482.71	4192.05	6364.94	3620.62
H12	1	48271.1	6358.7	3919.97	6069.49	3569.46
A1	2	21981	4375.55	13667.7	96359	2506.91
A2	2	36376.3	5855.64	15814.5	102468	2848.21
A3	2	32502.2	6805.5	18064.1	106347	2526.9
A4	2	35806.9	5437.8	17538.2	99063.7	2787.31
A5	2	31434.7	4729.25	18421.5	103377	2980.16
A6	2	50312.5	9133.67	25723.4	131697	5699.86
A7	2	49466.6	5403.39	19591.6	106295	2964.69
A8	2	176735	26936.6	67072.6	346688	15371.3
A9	2	43587.4	6516.36	19266.6	108795	3338.64
A10	2	30702	5465.39	19673	119999	3195.08
A11	2	33377.4	5039.52	20162.5	134469	2920.06
A12	2	34513	5102.28	18232.1	132708	2911.99
B1	2	40238.1	7044.66	18851.3	127340	3473.08
B2	2	43195.9	7247.49	18845.6	112929	3392.1
B3	2	34567	6058.81	19079.9	108879	2876.77
B4	2	30192.2	4376.62	19748.7	109002	2689.5
B5	2	30059.3	4258.08	22297.2	126027	2975.8
B6	2	25232.5	3780.77	20877.4	111650	1769.77
B7	2	28406.3	4403.96	20567.4	108715	2427.71
B8	2	108795	14414.1	62366.9	341124	7418.94
B9	2	34099.4	5490.49	18751.1	102382	2563.21
B10	2	39361.8	6276.42	21013.4	121012	2493.89
B11	2	43514.4	7109.28	23182	142331	3950.19
B12	2	46995.5	8587.62	23580.1	151940	6659.73
C1	2	45560.9	8196.56	20314.8	128641	4130.37
C2	2	49571.1	8061.52	26216.5	159648	4431.55
C3	2	38120.4	5705.92	19312.4	109572	2512.08
C4	2	31581.6	5016.37	21923	116458	3081.66
C5	2	29791	4626.71	20194.8	103810	2747.35
C6	2	28610.1	4466.33	22188.3	111864	2498.77
C7	2	33524.5	4916.98	21494.5	107357	1833.74
C8	2	33248.4	4932.67	20878	106199	2748.56
C9	2	33645	6538.04	19992.4	100825	2588.73
C10	2	31149.7	5772.23	20755.2	114748	2314.18
C11	2	33392.6	6169.51	23338.9	141364	2635.15
C12	2	44475.6	7052.98	22864.1	146766	3213.73
D1	2	50998.7	8830.81	22140.6	136420	3544.17
D2	2	40372.8	6720.48	21709.5	126334	3036.63
D3	2	40859.1	7712.57	22002.7	115582	3441.26
D4	2	32883.9	5955.42	24439.1	124946	4325.86
D5	2	29853.1	4934.88	21245.7	106340	2212.88
D6	2	38252.7	6643.61	24496.6	116048	4295.26
D7	2	27677.7	4309.51	21337.9	106232	2456.26
D8	2	29590.5	5879.32	22651.1	112184	2315.03
D9	2	41812.5	7654.02	21468	107101	3977.12
D10	2	39222.2	7137.46	22456.9	115926	3923.61
D11	2	43820.4	7835.17	26353	147968	3460.26
D12	2	166037	21113.6	31700.4	160979	7861.18
E1	2	50579.3	8008.11	20502	126891	4261.52
E2	2	52089.8	9138.38	22021.2	123079	4150.82
E3	2	71978.2	8881.96	22297.1	116007	4757.57
E4	2	36465.5	6140.17	26545.9	137622	3118.56
E5	2	27661	4612.36	21086.5	106995	2556.08
E6	2	29487.5	5192.32	24080	119128	3808.1
E7	2	38389.7	6387.33	22408.2	105792	4842.33
E8	2	35757.4	6338.04	24044	116479	4092.16
E9	2	34928.4	7653.91	25151.6	109826	2536.84
E10	2	36835.3	6079.49	21272.8	113908	2946.23
E11	2	64784.9	12487.7	28184.2	142072	8179.04
E12	2	60452.1	10142.3	24178.9	140257	5972.33
F1	2	51324.4	10157.1	23370.7	142866	7810.88
F2	2	54364.6	9028.62	22557.6	127668	3742.31
F3	2	36444.5	6518.44	21171.7	119456	2742.59
F4	2	35888.8	6042.3	25511.7	135116	3336.84
F5	2	27943.1	4356.49	20848.5	107660	2286
F6	2	57476.7	10428.9	28514.6	129857	6658.55
F7	2	29073.8	4854.34	22734.4	114743	3408.28
F8	2	31128.6	5003.35	22245.7	114360	2323.18
F9	2	31547.7	5286.46	20447	109269	2985.43
F10	2	32636.9	5530.49	21482.9	119171	3763.43
F11	2	32345.3	5065.66	23004.8	139382	2674.44
F12	2	56051.9	9892.24	24009.7	141693	6477.55
G1	2	50098.6	8660.57	21039	137446	3997.89
G2	2	61425.1	10541.7	24298.7	142162	3564.09
G3	2	40136	7159.57	18693.1	104761	2890.55
G4	2	32027.4	5618.4	24691.3	137786	3044.9
G5	2	27166	4370.8	19216.8	103479	2455.69
G6	2	29841.4	5222.99	21597.8	111021	2548.42
G7	2	29308.7	4809.22	21300.2	111788	2691.15
G8	2	37108.3	6543.78	23340.3	121776	3634.05
G9	2	35264.6	5494.18	20696.4	113351	2274.11
G10	2	38046.3	7157.14	21866.9	119185	2886.47
G11	2	87156.2	14455.4	28472.5	148737	8784.76
G12	2	43053.2	6420.84	21535.5	140926	3431.17
H1	2	59778.8	9772.5	24372	159907	8321.79
H2	2	44866.4	8020.37	24529.4	156299	3611.57
H3	2	37821.5	7148.18	22796.7	133642	4781.88
H4	2	38876.8	7332.77	26709.1	151009	3269.03
H5	2	30552.8	5455.41	21341.9	119693	2548.48
H6	2	38701.8	6686.96	25546.6	137851	4060.13
H7	2	33246.4	8729.9	26791.2	140604	2609.87
H8	2	35797.9	6436.26	22635.3	126130	2878.5
H9	2	33533.2	6001.46	22824.5	132506	2575.09
H10	2	36102.9	8502.54	5501.85	7002.72	3983.89
H11	2	39717.3	6367.75	4174.54	5962.91	3409.7
H12	2	47955.4	6277.28	3877.88	6109.15	3635.82
A1	3	22291	4467.65	13494.8	97112.3	2809.64
A2	3	37010.7	6160.08	16079.6	102918	2761.02
A3	3	32854.1	7371.09	17988.9	105897	2266.83
A4	3	35824.8	5384.79	17539.4	98473.5	3119.89
A5	3	31400.8	4659.25	18433.9	102529	2845.59
A6	3	50488.7	8955.45	25459.1	130882	5648.6
A7	3	49085.3	5355.26	19425.2	105342	3139.47
A8	3	174374	27087.5	66358.6	344977	14090.1
A9	3	43133.7	6296.71	19155.6	107590	2974.71
A10	3	30534.2	5618.75	19557.7	119555	3164.13
A11	3	33002.4	5077.83	20047.9	133758	2931.68
A12	3	34622.5	5337.38	18170.9	132521	3236.18
B1	3	40461.9	6921.04	18893.2	126683	4268.18
B2	3	43077.8	7473.51	19035.3	112501	3023.31
B3	3	33900.5	6268.35	19122.8	108754	2698.59
B4	3	29381.1	4491.05	19425.3	108505	2595.68
B5	3	29656.5	4852.83	22273.6	125442	3409.01
B6	3	25253.7	3872.92	20663.7	111280	1876.75
B7	3	28073.1	4341.89	20391.6	108163	2343.38
B8	3	108333	14433	61840.5	339058	8491.01
B9	3	33949	5571.74	18791.3	102160	2489.53
B10	3	39279.4	6165.81	21170.3	120716	2586.69
B11	3	43295.6	6830.28	23040.7	140558	4334.71
B12	3	47165.9	8442.19	23365.9	151763	6496.68
C1	3	45777.5	8127.85	20246.9	128454	4326.63
C2	3	49274.3	8258.93	26538.1	159550	4475.78
C3	3	37566.6	5591.44	19181.2	109357	2321.96
C4	3	31670.4	5092.88	21791.2	115922	3752.2
C5	3	30091.8	4513.07	20241.2	103118	2796.5
C6	3	28627.8	4760.38	21974.3	111455	2597.27
C7	3	33919.5	5192.49	21414.4	106863	1851.88
C8	3	33219.4	4890.25	20736.4	105570	2546.33
C9	3	33271.4	6558.05	19847.7	100113	2722.85
C10	3	30903.6	5632.27	20595.3	114290	2191.86
C11	3	33400.6	5798.95	23041.4	140152	2204.42
C12	3	44312.6	7265.59	22807.6	145717	3309.75
D1	3	51528.5	9180.63	22015.7	136169	3189.27
D2	3	40329.8	7192.78	21537	126399	2942.52
D3	3	40755.5	7888.53	22030.2	115191	3690.9
D4	3	32876.2	5693.59	24254.7	124745	4368.16
D5	3	29859.3	4867.8	21098.4	105534	2299.76
D6	3	38266.3	6492.42	24123.6	115827	4391.7
D7	3	27914.6	4636.76	21468.5	105551	2356.04
D8	3	29649.5	5943	22600.8	111741	2394.28
D9	3	41153.9	7582.41	21585.9	106215	3847.04
D10	3	39010.8	6959.28	22484.6	115024	3961.35
D11	3	43265.8	8249.9	26095.4	146968	3278.85
D12	3	165089	21095.1	31684.4	160590	7834.35
E1	3	50773.9	8163.17	20456.2	127181	4178.66
E2	3	51806.3	8972.64	22021.2	122861	4275.97
E3	3	71379.8	8740.68	22191.7	115650	5084.09
E4	3	36355.4	5983.62	26597.2	137648	3199.31
E5	3	27817.5	4430.13	20945.5	106162	3022.28
E6	3	29323.7	5171.6	24095.4	118800	3606.42
E7	3	37690.4	6373.04	22430.8	106399	4945.52
E8	3	35423.8	6143.11	23854.5	115907	4013.47
E9	3	34592.5	7778.12	24913.1	109094	2390.97
E10	3	36434.4	6357.56	21199.6	113677	2968.26
E11	3	63745	12289.2	27805.3	141265	7645.68
E12	3	60338.3	10263.5	24075.6	139656	6051.08
F1	3	51303.6	10034.2	23186.2	142708	8009.91
F2	3	54004.1	9102.02	22282.8	127532	3439.82
F3	3	36463.6	6629.38	21191.2	119003	2689.43
F4	3	36198.8	6012.14	25424.8	134608	3408.15
F5	3	28226.9	4648.81	20821.1	107908	2178.31
F6	3	57687.9	10587.6	28315.2	129450	6791.68
F7	3	29201.8	4810.69	22592.5	114103	3476.71
F8	3	31108.1	4786.67	22173.8	113991	2592.86
F9	3	30942.9	4930	20471	108822	3179.41
F10	3	32438.2	5650.33	21188.1	118447	3860.4
F11	3	32295.7	5057.61	23173.1	138872	2637.63
F12	3	55911.7	9982.33	23936	140985	6240.89
G1	3	50170.2	8280.11	21050.6	137220	3906.38
G2	3	61003	10479	24075.5	141592	3712.87
G3	3	40062.3	7237.72	18636.5	105141	3029.58
G4	3	32039.2	5461.06	24709.8	137300	3084.93
G5	3	27329.9	4511.72	19221.5	103030	2331.84
G6	3	29786.1	5187.7	21275.2	109980	2443.45
G7	3	29364.6	4909.5	21152.4	111313	2430.74
G8	3	37169.7	6354.62	23221.3	121437	3500.93
G9	3	35092.6	5232.79	20514.1	112941	2585.09
G10	3	37875.1	7069.38	21639.4	118736	2705.15
G11	3	87006.7	14661.5	28487.7	147983	8965.64
G12	3	42916.8	6671.99	21305.4	140919	3184.78
H1	3	59634.3	9984.29	24435	159985	8053.64
H2	3	45300	8042.03	24403.1	156376	3981.6
H3	3	37696.4	6835.78	22676.6	133648	5022.27
H4	3	38911.7	7294.01	26574.2	150118	3342.92
H5	3	30267.2	5336.29	21304.9	119371	2589.76
H6	3	38533.9	6495.66	25512.1	137853	4108.31
H7	3	33462.8	8736.19	26651.1	140292	2582.88
H8	3	36105	6455.14	22548.5	125467	3085.74
H9	3	33305.4	5882.29	22682.2	131679	2666.96
H10	3	35998.2	8406.84	5553.63	7123.89	4125.32
H11	3	39509.8	6642.5	4234.74	6092.42	3476.25
H12	3	47444.8	6494.91	3909.11	5740.87	3925.28
A1	4	22334.2	4604.96	13655.1	96244	2677.01
A2	4	36685.1	5888.03	15707.3	101759	3127.77
A3	4	32854.1	7112.46	18017.6	105023	2725.7
A4	4	35341	5421.67	17423	97620.4	3132.56
A5	4	30987	4735.42	18396.6	102333	2769.95
A6	4	50199.2	8816.84	25528.9	130229	5687.31
A7	4	48987.8	5629.62	19453.6	104111	3044.05
A8	4	173586	26899.6	66230.4	340132	15641.1
A9	4	42880.3	6317.04	19048.7	106335	2867.91
A10	4	30534.2	5803.93	19631.6	118153	3426.06
A11	4	32647.4	4922.18	19873.2	133109	3136.1
A12	4	34237.6	5021.93	18131.9	131963	3206.32
B1	4	40696.7	7307.86	18789.4	125960	3424.02
B2	4	43209	7644.51	18823	112994	3084.56
B3	4	33769.1	6172.52	19048.4	108359	2698.59
B4	4	29883.2	4702.92	19639.7	108219	2521.28
B5	4	29992.2	4387.38	22073.5	124879	3416.25
B6	4	25090.2	3819.62	20711.5	110814	2068.05
B7	4	28193.6	4245.74	20323.7	107982	2693.11
B8	4	107523	14902.3	61452.1	336404	9013.3
B9	4	34165.4	5628.34	18501.4	101524	2447.16
B10	4	38842	6213.21	20872.4	120187	2505.73
B11	4	43483.6	6620.16	22971.7	140973	3953.66
B12	4	46821.8	8550.19	23276.1	151002	6083.44
C1	4	45584.7	8348.71	20122.5	127898	3894.87
C2	4	48519.5	7969.62	26247	159811	4594.86
C3	4	37334.9	5509.33	19153.4	108245	2432.21
C4	4	31675.7	4953.87	21660.5	115612	3106.5
C5	4	29820.9	4459.71	20131.8	102758	3093.41
C6	4	28533.2	4541.92	21976.1	110904	2652.56
C7	4	33864	5142.47	21339.2	106546	1917.84
C8	4	33126.4	5051.27	20663.9	105099	2475.33
C9	4	33243.4	6550.22	19702.1	99979.6	2857.87
C10	4	30665.3	5591.17	20459.4	113354	2417.61
C11	4	33423.3	5762.88	22991.3	139703	2301.61
C12	4	44387	7148	22703.9	145378	3160.38
D1	4	51260.3	8997.29	22094.6	135108	3893.29
D2	4	40037.6	7096.01	21529.2	126032	2644.87
D3	4	41028.9	7789.49	21927.7	114971	3576.09
D4	4	32764.6	5885.87	24190.1	124287	3595.19
D5	4	30104.6	4845.12	21005.8	105633	2588.35
D6	4	38215.9	6642.74	24120.9	115323	4139.68
D7	4	27836.7	4457.16	21323.3	105396	2582.9
D8	4	29853.8	6032.32	22544.9	111182	2529.47
D9	4	41049.2	7394.11	21340	105685	3784.87
D10	4	38745.6	6812.99	22203	114786	3688.48
D11	4	43066.9	8391.94	26146.9	146847	3646.87
D12	4	163970	21045.4	31412.9	159856	7797.59
E1	4	50142.2	8151.69	20409.3	126439	4155.58
E2	4	51146.1	8814.49	21976.9	122503	4177.94
E3	4	70225	8851.29	22049.9	115240	4600.43
E4	4	36523.4	6217.56	26463.4	137244	3100.71
E5	4	27922	4589.36	20937.2	105698	3001.47
E6	4	29338.6	5177.64	24019.9	118656	3611
E7	4	37452.7	6139.98	22268.8	106067	4583.88
E8	4	35384.7	6563.66	23805.5	115225	4369.51
E9	4	34358.9	7693.55	24824.2	108649	2658.4
E10	4	36541	6076.82	21002.8	113014	3107.82
E11	4	63342.9	12197.6	27675.1	140413	7644.73
E12	4	60136.6	10199.1	23999.1	139193	5928.39
F1	4	51263.5	9736.87	23187.5	141966	7926.98
F2	4	53463.9	9289.72	22224.3	126848	3660.55
F3	4	36513.2	6394.08	21117.7	119448	2607.44
F4	4	36285.2	6162.95	25379.7	134279	3338.58
F5	4	28052.6	4533.01	20844.4	107587	2126.59
F6	4	57996.8	10499.1	28397.8	129333	6776.53
F7	4	29266.6	4746.78	22499.8	113505	3005.94
F8	4	31006	4839.08	22089	113495	2128.55
F9	4	31156.8	5029.78	20257.5	108132	2964.16
F10	4	32671.3	5408.1	21255.8	118114	3696.17
F11	4	32337.1	5313.16	23106.8	138982	2550.07
F12	4	55677.2	9918.84	23730.4	139779	6122.56
G1	4	49706.8	8856.45	20988.4	136860	4009.49
G2	4	60726.4	10695.5	23910.9	141404	3683.33
G3	4	39781.8	7112.31	18626.8	104946	2872.83
G4	4	32082.2	5293.22	24692.1	137339	2921.57
G5	4	27309.2	4415.71	18959.9	102738	2544.04
G6	4	29738.8	5160.33	21193.1	109361	2322.1
G7	4	29108.4	5053.52	21176.1	110620	2556.24
G8	4	37223.5	6533.14	23165.5	120705	3688.32
G9	4	34901.9	5583.3	20531.3	112496	2335.43
G10	4	37624.9	6940.42	21411	118305	2550.38
G11	4	85546.9	14580.4	28283	147574	8844.69
G12	4	42760.3	6508.19	21407.9	140143	3196.19
H1	4	59944.6	9952.25	24428.7	159355	7830.45
H2	4	45130.8	8168.21	24386.7	155837	4378.14
H3	4	37931.4	6673.59	22707.3	133567	5002.58
H4	4	38939.2	7166.19	26542.3	149155	3264.97
H5	4	30456.9	5364.18	21310.1	118973	2872.01
H6	4	38725.8	6614.55	25462.6	137027	4066.24
H7	4	33140	8749.56	26762.4	139382	2832.91
H8	4	35848	6536.25	22572.1	125105	3109.32
H9	4	33586.9	5986.57	22595.9	130534	2620.59
H10	4	36247.2	8473.33	5560.47	7100.86	4043.65
H11	4	39464	6524.09	4085.88	6350.3	3505.58
H12	4	47596.8	6420.88	4005.51	5980.25	3534.16
A1	5	22178.3	4586.54	13663	96494.1	2455.01
A2	5	36813.1	5973.86	16045.9	101736	3108.4
A3	5	32477.8	7277.3	18168	104971	2590.66
A4	5	35332	5479.28	17445.8	97320.2	3198.02
A5	5	30886.6	4804.4	18249.5	101745	2662.89
A6	5	49687.3	8903.34	25246.4	130151	5459.23
A7	5	48735.1	5704.71	19502.5	103634	2711.49
A8	5	172983	25969	65746.6	339318	15196.6
A9	5	42108.8	6226.54	18819.7	106042	3232.83
A10	5	30746.6	5421.09	19484.9	116926	3411.69
A11	5	32338.2	5037.12	19858.2	132746	2780.68
A12	5	34617	5245.13	18042.9	131426	3250.39
B1	5	40058.2	6998.8	18884.1	125262	3539.06
B2	5	42923.6	7144.89	18813.1	112458	3321.73
B3	5	33622.6	6311.79	19090	108439	2981.78
B4	5	30022.4	4807.15	19505.5	108181	3027.04
B5	5	29814.9	4444.48	22192.4	124612	3377.64
B6	5	24784.4	3948.81	20623.4	110825	2024.54
B7	5	28135.6	4347.14	20340	107938	2034.48
B8	5	107499	14770.1	61345.1	336444	7773.24
B9	5	33927.9	5304.25	18486.4	101220	2462.82
B10	5	38570.4	6244.82	21037.3	119783	2808.83
B11	5	43134.4	6742.73	22915.4	140597	4074.9
B12	5	46492.4	8194.53	23233.3	150324	6464.35
C1	5	45838.9	8018.64	20234.2	127347	3956.55
C2	5	48464.6	7877.73	26020.2	158683	4378.81
C3	5	37483.2	5470.01	19045.4	108607	2479.46
C4	5	31560.4	4907.53	21766.8	115657	3163.73
C5	5	29815.1	4738.38	20055.4	102579	2871.73
C6	5	28647	4628.31	21790.9	110980	2426.19
C7	5	33580.1	4986.06	21237.3	106228	1918.66
C8	5	33095.7	4750.87	20663.9	104632	2374.66
C9	5	33199.3	6411.07	19791.6	99689.9	2592.33
C10	5	30687.1	5595.08	20462.4	113171	2252.52
C11	5	33693.4	5702.75	22970.6	139228	2720.19
C12	5	44161.1	6978.15	22660.2	144614	3258.77
D1	5	50512	8894.03	21979.7	135213	3152.72
D2	5	39980.8	7062.61	21540.4	125891	2904.22
D3	5	41090.8	7939.1	21843.1	114945	3606.64
D4	5	32756	5933.94	24281.2	124249	3983.26
D5	5	30002.6	4834.73	21065.5	105478	2143.98
D6	5	37999.8	6618.55	24197.7	115265	4525.44
D7	5	28031	4594.45	21314.2	105184	2527.32
D8	5	30024.9	5950.07	22643.7	111208	2196.62
D9	5	40454.2	7566.5	21301	105161	4065.12
D10	5	38865.2	6677.95	22083.2	114624	3759.12
D11	5	42975.9	8174.21	26028.4	146926	3278.85
D12	5	162955	20830.8	31317.3	158781	7771.75
E1	5	50345.1	8003.51	20379.9	125858	4093.7
E2	5	51058.3	8642.25	21950.6	122012	3809.79
E3	5	70393.6	8583.6	21938.9	115437	4839.43
E4	5	36583.8	6277.15	26405.6	137244	3285.7
E5	5	28055	4539.82	20888.3	105430	2819.91
E6	5	29364.4	5044.66	23876.2	118475	3583.5
E7	5	37250.7	6244.46	22305.6	105666	4791.21
E8	5	35118.6	6407.53	23723.5	115171	4130.55
E9	5	34220.9	7578.16	24611	108586	2626.61
E10	5	36446.6	6282.05	21001	112755	2944.39
E11	5	62735.4	12193.8	27567	140193	7728.84
E12	5	59797	10227.6	23807.9	138467	6015.43
F1	5	50851	9832.64	23008.3	141786	7527.63
F2	5	53379.3	9270.85	22120.2	127077	3653.4
F3	5	36270.5	6397.66	20949.4	119158	2750.7
F4	5	36309.8	6024.71	25285.9	134172	3491.64
F5	5	28020.1	4575.93	20692.2	107740	2219.01
F6	5	58359.8	10543.7	28192.9	128983	6913.64
F7	5	29137.8	4691.44	22405.4	112699	3318.41
F8	5	31122.8	4907.14	22079.3	113400	2488.94
F9	5	31075.4	4979.89	20220.3	108144	3085.82
F10	5	32252.9	5393.66	21046.7	117681	3911.95
F11	5	32137.5	5272.92	22913.8	138785	2723.2
F12	5	55735.8	9851.06	23509.3	138725	6192.07
G1	5	49391	8661.98	20817.1	136615	4187.34
G2	5	60275.7	10372.6	24167.2	141078	3517.05
G3	5	39407.9	6815.13	18520.7	105042	2823.24
G4	5	32014.9	5441.69	24477.1	136886	2967.31
G5	5	27205.9	4457.52	19191.9	102481	2347.62
G6	5	29738.8	5092.63	21021.5	109212	2610.22
G7	5	29225.2	5088.21	21085	110462	2372.7
G8	5	36648.4	6515.12	23082.3	120288	3790.91
G9	5	34762.1	5471.04	20405.8	112147	2705.11
G10	5	37221.9	7072.06	21435.2	118415	2666.68
G11	5	84684.9	14144.6	28225.3	147419	8801.1
G12	5	42696.1	6762.99	21313.4	139382	2931.55
H1	5	59011.6	10121.3	24313.7	158728	7718.85
H2	5	45228.8	7691.55	24329.4	155651	4019.64
H3	5	37782.7	6734.55	22544.1	133053	5406.68
H4	5	38533.2	7087.85	26408.2	149116	3208.95
H5	5	30262	5349.1	21129.4	118523	2575.5
H6	5	38581.9	6765.45	25363.5	136679	3704.51
H7	5	33554.1	8806.97	26694.7	138451	2588.44
H8	5	35921	6490.1	22281.9	124492	2834.19
H9	5	33300.2	5700.03	22355.4	129653	2652.96
H10	5	36039.9	8280.91	5687.49	7280.1	4279.7
H11	5	39597.9	6436.72	4206.28	6006.83	3547.31
H12	5	47484.4	6567.45	3785.55	6245.13	3395.79
A1	6	22217.8	4882.93	13647.2	95902.3	3405.01
A2	6	36216.3	6126.08	15767	101737	2974.15
A3	6	31989.1	6906.4	17957.4	104683	2661.93
A4	6	34994.1	5542.66	17234.7	97117	2877.05
A5	6	30816.7	4850.72	18075.4	101010	3012.57
A6	6	49565.2	8971.08	25274.3	129436	5620.35
A7	6	48150.3	5504.47	19101.1	103158	2696.37
A8	6	171674	26094.2	65099.6	336994	13483.2
A9	6	42285	6240.78	18774.9	105725	2938.12
A10	6	30156.5	5506.29	19198.3	116220	3439.32
A11	6	32615.9	5238.27	19911.4	131695	3031.57
A12	6	33734.2	5231.74	18141.7	130636	3462.25
B1	6	40152.6	6899.1	18756.6	125649	3342.82
B2	6	42699	7284.67	18622	112325	3057.19
B3	6	33436.5	6190.41	18893.1	108415	2502.72
B4	6	29853.9	4665.53	19382.8	108063	2618.33
B5	6	29914	4534.99	22022.9	124591	3597.26
B6	6	25163.2	3853.04	20569.9	110456	1894.89
B7	6	28017.9	4258.85	20303.8	107524	2252.84
B8	6	107043	14764.7	60821.6	334254	8432.98
B9	6	33501.7	5212.95	18403.2	100945	2533.74
B10	6	38271	6085.81	20799.9	119548	2487.96
B11	6	43102.4	6728.72	22856.8	140202	4170.74
B12	6	46492.4	8401.88	23016.4	149740	6312.55
C1	6	44873.5	8072.63	20022.3	127384	4338.97
C2	6	49224.6	8345.73	26345.1	158977	4399.23
C3	6	37139	5443.41	18889.9	108723	2337.71
C4	6	31717	4937.7	21745.8	115426	3230.67
C5	6	29414.1	4516.03	20135.9	102579	2879.76
C6	6	28617.3	4480.46	21825	111192	2319.91
C7	6	33404.2	5225.83	21127.1	106012	1923.61
C8	6	32798.1	5126.58	20467.9	104509	2566.11
C9	6	32906.3	6535.43	19722	99194.6	2652.64
C10	6	30391.5	5540.28	20378.4	112711	2248.55
C11	6	33435.8	5955.26	23100.3	139044	2340.27
C12	6	43985.2	7136.12	22305.3	143615	3306.19
D1	6	51025.2	8679.08	21891.7	135259	3397.01
D2	6	39926.3	7213.51	21628.9	126012	2850.6
D3	6	40849	7589.3	21904.4	114317	3644.56
D4	6	32338.4	5714.05	24094.7	124711	4201.09
D5	6	29663.2	4874.41	20962	105331	2270.8
D6	6	37826.9	6419.85	24002.9	114845	4522.71
D7	6	28051.1	4518.47	21054.8	104757	2414.35
D8	6	29725.9	6154.37	22565.4	110710	2294.52
D9	6	40238.4	7509.04	21122.8	105042	3732.26
D10	6	38580.6	7092.45	22100.4	114388	3747.51
D11	6	42908.1	8199.09	26019.1	146139	3582.24
D12	6	161830	20639.7	30871.8	158522	7718.09
E1	6	50031.7	8275.74	20264.3	125546	4191.24
E2	6	50889	9013.81	21719.7	122204	4127.88
E3	6	69719.4	8703.5	21910	115026	4702.05
E4	6	36454.1	6123.27	26347.9	136971	3475.39
E5	6	28140.1	4582.29	20855.1	105230	2703.6
E6	6	29464	5108.56	23848	118293	3625.67
E7	6	37036.5	6231.06	22236.8	105769	4425.79
E8	6	35038.7	6018.57	23693.3	114852	3858.95
E9	6	34042.2	7675.94	24557.5	108047	2577.99
E10	6	36851.1	6027.07	20894.5	112532	3234.52
E11	6	62341.2	12178.4	27345	139595	7445.92
E12	6	59512.6	9827.98	23810.3	138141	6119.89
F1	6	50879.2	9603.94	22808.1	141375	7846.6
F2	6	52698	9173.33	22282.8	126664	3453.1
F3	6	36245.2	6417.35	21075.2	119162	2638.08
F4	6	36599.1	6101.78	25321.7	134186	3565.56
F5	6	28091.8	4478.76	20525.1	107819	2343.66
F6	6	58551.6	10734.9	28467.1	129294	6783.7
F7	6	29266.6	4793.54	22458.6	112845	3052.11
F8	6	31060.3	4966.59	21914.6	113065	2209.37
F9	6	31099.5	4971.85	20239.3	107723	3078.16
F10	6	32138.9	5511.8	21060.4	117085	3710.15
F11	6	32337.1	5235.69	22902.9	138309	2900.3
F12	6	55247.5	9647.73	23330.8	137791	5809.77
G1	6	49477.2	8592.94	20883.3	136493	4061.04
G2	6	60230.4	10360.8	23811.5	140986	3708.49
G3	6	39261.4	7003.25	18504.8	104838	2819.7
G4	6	32186.3	5356.97	24617.5	136872	3180.49
G5	6	27327.7	4524.11	18991.8	102171	2575.6
G6	6	29750.8	5212.91	21103.6	109012	2346.66
G7	6	29465.8	4923.08	21142.4	110092	2517.81
G8	6	36849.6	6483.18	23033.3	119971	3518.74
G9	6	34807	5247.36	20329.2	111968	2349.45
G10	6	37172.7	7009.38	21513.1	117918	2759.18
G11	6	84503.1	14274.1	27836.5	147594	9015.76
G12	6	43293.9	6619.82	21253.1	138829	3357.02
H1	6	58909.4	9589.18	24378.3	157491	7813.4
H2	6	45079.8	7929.88	24317.7	155337	4141.83
H3	6	37473.2	6504.88	22712.5	132588	5130.03
H4	6	38653.9	7354.21	26296.5	148236	3209.76
H5	6	30092.5	5382.28	21201.2	118429	2578.5
H6	6	38283.7	6693.05	25230.7	136233	3895.7
H7	6	33415.6	8832.92	26604.5	137934	2666.22
H8	6	35620.7	6392.91	22202	123757	2940.67
H9	6	33546.2	5783.28	22289.8	129235	2920.71
H10	6	36418.9	8375.61	5623.98	7143.92	3876.33
H11	6	39594.3	6625.26	4158.12	6152.1	3344.28
H12	6	47568.7	6490.47	4017.73	5893.85	3930.92
A1	7	22531.5	4656.87	13424	95187.9	2596.29
A2	7	36124.1	5938.23	15803.8	101237	2792.85
A3	7	32406.1	6949.03	17806.9	104191	2590.66
A4	7	35192.5	5365.2	17234.7	97117	2716.57
A5	7	30462.7	4917.64	18109.6	100954	2895.68
A6	7	49571.8	8774.11	25238.8	128925	5530.37
A7	7	47579.4	5294.61	19147.1	102844	2947.68
A8	7	170739	25545	64659.6	335709	14844.1
A9	7	42139.9	6162.47	18736.2	105575	2822.42
A10	7	30227.3	5561.95	19374.1	116826	3402.85
A11	7	32668.8	4887.46	19696.2	131753	2894.51
A12	7	33978.6	5201.98	18091.6	130267	3257.5
B1	7	40178.9	7387.62	18765.7	125316	3696.39
B2	7	42338.1	7454.18	18692.7	112582	3042.86
B3	7	33896.4	6072.86	19106.4	108192	2567.61
B4	7	29702.9	4793.55	19402.3	107790	2931.06
B5	7	29545.3	4612.56	22180.6	124020	3534.51
B6	7	24874	3867.5	20580.2	110526	2063.52
B7	7	27634.9	4304.3	20128	107451	2606.12
B8	7	107043	14913.1	61409.8	333495	7828.22
B9	7	33371.4	5346.24	18294.7	100921	2366.11
B10	7	37792.9	6216.17	20713.5	118779	2462.29
B11	7	43090.9	6494.08	22944.1	139931	3770.06
B12	7	46766.6	8285.24	22867.1	148663	5854.32
C1	7	44684.4	7821.09	20154.7	126871	4257.1
C2	7	48643	8330.41	26145.4	158948	4123.64
C3	7	37292	5579.87	18914.3	108488	2192.59
C4	7	31587.9	5027.14	21654.9	115745	3020.12
C5	7	29793.9	4493.3	19991.3	102403	2843.65
C6	7	28607.7	4501.22	21875.6	110418	2598.99
C7	7	33522.2	5020.2	21142.1	106072	1991.22
C8	7	32728.1	4841.77	20399.9	104155	2225.46
C9	7	32913.1	6541.52	19634.3	98975.3	2495.12
C10	7	30413.2	5499.17	20270.5	112564	2415.62
C11	7	33274.6	5909.35	22940.1	138608	2398.8
C12	7	43517.9	6746.53	22220	143197	2868.76
D1	7	51092.5	8837.13	21984.7	134743	3712.48
D2	7	39919.3	7053.39	21412.7	125812	2787.13
D3	7	40834.7	7767.36	21935.1	114137	3359.1
D4	7	32723.3	5783.59	24254.7	123983	3793.99
D5	7	30126.5	4725.13	21099.4	105134	2539.42
D6	7	37850.9	6626.33	24082.5	114636	4349.84
D7	7	27954.7	4722.24	21281.3	104756	2532.79
D8	7	30038.2	6066.81	22653.9	110416	2409.2
D9	7	39815.2	7226.14	21095.9	105086	3782
D10	7	38546.3	6956.47	22045.8	114164	3604.3
D11	7	42841.4	8200.13	25826.4	145882	3256.96
D12	7	160050	20492.5	31073.3	157912	7771.75
E1	7	49761.4	7966.76	20220.7	125311	4075.87
E2	7	50711.3	8447.26	21655.4	121736	3629.36
E3	7	69303	8740.68	21936.1	114561	4534.56
E4	7	36458.2	6182.87	26376.3	136855	3149.54
E5	7	27978	4782.21	20696.6	105367	2768.85
E6	7	29227.3	5219.95	23856.2	118235	3678.84
E7	7	36807.7	6070.33	22163.4	105487	4537.49
E8	7	35280.8	6395.8	23600	114680	3606.55
E9	7	34441.2	7480.38	24655.5	107887	2583.6
E10	7	36585.5	6222.52	20799.7	112326	3290.52
E11	7	61487.2	12062.7	27211.1	139511	7654.29
E12	7	59241.1	10058.7	23745.2	137633	5887.76
F1	7	50439.9	9702.56	22872.2	141073	7567.18
F2	7	52278	8702.5	22229.3	126476	3732.09
F3	7	36072.1	6510.39	21033.5	119078	2599.33
F4	7	36346.2	5997.9	25518.5	134014	3287.27
F5	7	28197.5	4450.42	20827.8	107562	2032.47
F6	7	58513.5	10698.6	28351.8	129101	6843.49
F7	7	29222	4830.18	22303	112591	3206.29
F8	7	31155.1	5057.33	21858.1	112861	2526.88
F9	7	31025.7	5117.48	20220.3	107807	3127.51
F10	7	32295.6	5397.06	21043.3	116330	3919.81
F11	7	32372.2	5194.44	22874.2	137659	2376.95
F12	7	55101	9571.37	23285.8	136947	5813.08
G1	7	49382.2	8762.03	20753.6	135894	3826.48
G2	7	59844	10418.7	23878.9	140808	3471.1
G3	7	39261.4	7025.97	18592.3	104762	2925.97
G4	7	32208.3	5399.73	24582.2	136870	2828.46
G5	7	27393.3	4444.36	18945.9	102246	2421.77
G6	7	29817.4	5221.55	20948.9	108417	2534.28
G7	7	29182	4898.95	20933.3	109897	2724.88
G8	7	36735.9	6491.37	22876	119835	3763.78
G9	7	34810.4	5462.47	20257	111645	2560.57
G10	7	37240.3	7097.14	21413.7	117594	2610.82
G11	7	83772	14345	27900.8	147201	8700.86
G12	7	43054.5	6748.43	21048.1	138076	3072.99
H1	7	59225.6	9975.39	24089.9	157272	8033.49
H2	7	45142.9	8048.4	24404.2	155095	3888.23
H3	7	37366.5	6648.56	22505.1	132659	5001.54
H4	7	38390.5	7184.33	26296.5	148111	3427.37
H5	7	30256.1	5535.32	21146.5	118358	2617.54
H6	7	38358.6	6704.48	25350	136020	3792.46
H7	7	33050.2	8670.91	26664.4	137434	2570.97
H8	7	35818.9	6330.68	22144.4	123295	2797.03
H9	7	33156.4	5710.55	22230.3	128425	2843.71
H10	7	36358.9	8508.58	5727.55	7146.92	4309.58
H11	7	39526.7	6506.85	4124.19	6300.75	3530.39
H12	7	47672.8	6389.79	3755.67	5756.45	3601.94
A1	8	22014.8	4609.98	13436.6	94808.9	3031.64
A2	8	35773.9	6189.23	15751.7	100963	2539.58
A3	8	32437	7109.61	17649.6	104261	2740.7
A4	8	35140	5358.29	17102.4	96135.2	2879.17
A5	8	30858.4	4729.25	17954.2	100593	2839.69
A6	8	49239.4	8726.17	25025	128526	5307.52
A7	8	48041.1	5368.74	19117.7	102379	2917.45
A8	8	169671	25809.6	64650.8	334100	14326.1
A9	8	41583.8	6233.66	18641.5	105317	2802.64
A10	8	30174.9	5483.57	19247.6	116105	2887.84
A11	8	32524.3	4840.76	19500.7	131028	3014.14
A12	8	34361.6	5081.45	17998.4	130100	3084.04
B1	8	39663.3	7254.03	18811.2	124947	3327.59
B2	8	42425.1	7251.95	18442.2	112119	3320.43
B3	8	33318.8	6305.4	19038.3	108010	2960.54
B4	8	29717	4740.3	19506.7	107440	2695.98
B5	8	30056	4480.04	21852.2	123604	3470.56
B6	8	24942.4	3886.47	20436.8	110111	2046.3
B7	8	28081.3	4471.27	20192.3	107377	2293.67
B8	8	106751	14791.7	60785	331787	8301.64
B9	8	33367.6	5595.48	18166.6	100328	2454.53
B10	8	37832.5	6222.1	20572.5	118390	2107.86
B11	8	42755.7	6694.87	22748.8	139825	3811.63
B12	8	46312.2	8011.66	22905.8	148379	6191.67
C1	8	44437.7	8173.25	19940.5	126748	4104.58
C2	8	48950.1	8284.46	26028.7	158550	4070.9
C3	8	37100.8	5452.66	18817.9	108131	2380.46
C4	8	31847	4993.74	21777.9	115465	3457.42
C5	8	29684	4522.95	19998.6	102291	2824.59
C6	8	28496.3	4630.8	21707.9	110569	2560.11
C7	8	33446.6	5175.02	21209	105942	2136.34
C8	8	33075.3	4770.78	20356.4	104171	2433.98
C9	8	32986.1	6646.75	19654.2	98792.5	2641.84
C10	8	30279.8	5558.87	20154.6	112235	2302.25
C11	8	33046.4	5800.04	22736.3	138134	2319.28
C12	8	43711.8	6898.57	22292.6	142152	3393.91
D1	8	50871.8	8915.1	21773.8	134595	3583.6
D2	8	39884.5	6956.63	21569.5	125707	3020.21
D3	8	40518.7	7566.12	21756.3	114135	3618.22
D4	8	32308.6	5767.23	24146.6	124432	3961.06
D5	8	30024.6	4800.72	20945.1	104963	2442.56
D6	8	37394.6	6599.55	24098	114291	4237.03
D7	8	27893.7	4523.65	21237.5	104388	2231.23
D8	8	30151.2	6225.12	22523.5	110557	2584.48
D9	8	39736.7	7379.08	20976.2	104548	4044.08
D10	8	38174.5	6851.44	22104.3	113838	3601.4
D11	8	42917.6	7761.56	25872.8	145879	3475.9
D12	8	159006	20277	30995.7	157169	7665.42
E1	8	49877.9	7941.49	20184.7	125063	3904.91
E2	8	50615	8931.48	21910.5	121590	4040.27
E3	8	68983.7	8749.04	21731.9	114312	4594.78
E4	8	36321.9	6197.1	26490.9	136702	3335.47
E5	8	28187.1	4605.29	20786.9	104924	2928.66
E6	8	29270.4	5117.2	23849.8	118101	3329.56
E7	8	36776.1	6246.24	22051.3	105511	4610.39
E8	8	34801.7	6228.84	23503.9	114206	4187.17
E9	8	34308.2	7584.33	24475.9	107732	2686.46
E10	8	36396.8	6314.03	20946	111988	3190.45
E11	8	61436.3	11875.8	27329.7	138964	7189.75
E12	8	58883.4	9931.64	23843.7	137159	5770.04
F1	8	50019.9	9695.42	23016.1	140482	7571.01
F2	8	52033.5	8901.74	22078.8	126585	3705.52
F3	8	36015.6	6367.25	21084	118991	2465.99
F4	8	36251.1	6236.67	25418.8	133965	3387.28
F5	8	28245.8	4418.03	20668.1	107626	2303.81
F6	8	58562	10627.6	28262.3	129120	6702.4
F7	8	29132.1	4880.06	22282.1	111963	3229.37
F8	8	30822.4	4874.28	21938.8	112975	2277.82
F9	8	30880.3	4925.98	20249.2	107704	3088.37
F10	8	32304.9	5523.69	20805.1	116247	3704.03
F11	8	32327.8	5131.06	22885.1	137664	2648.58
F12	8	54762	9506.16	23135.1	136581	6063.81
G1	8	48967	8598.57	20718.5	135187	3928.29
G2	8	59901.3	10418.7	23975	140594	3804.76
G3	8	38960.3	7269.53	18676.3	105104	2670.04
G4	8	32040	5439.27	24554.9	136603	2986.91
G5	8	27462	4585.27	18970	101761	2655.27
G6	8	29700.2	5341.83	21007.6	108428	2468.76
G7	8	29276.2	5126.66	20959.3	109222	2837.83
G8	8	36705.2	6363.63	23005.8	119447	3693.4
G9	8	34301	5324.49	20341.3	111603	2398.5
G10	8	36933.9	6992.36	21407.4	117259	2665.77
G11	8	82937.8	14003.8	27788.6	146362	8757.52
G12	8	42538.3	6441.46	21257.6	137689	3078.7
H1	8	59333.5	10051.9	24064.7	156926	8010.25
H2	8	44592.5	7808.8	24431.1	154596	4209.84
H3	8	37316.9	6977.29	22372.7	132235	4982.89
H4	8	38348.4	7298.13	26112.1	147581	3249.54
H5	8	29962.4	5261.65	21062.8	117808	2516.95
H6	8	38363.1	6567.3	25222.5	135375	3972.94
H7	8	33111.6	8917.86	26417.8	137000	2347.93
H8	8	35396.2	6246.08	22103.4	122782	2976.4
H9	8	33061.1	5875.28	22075.1	127597	2809.58
H10	8	36351.8	8425.98	5707.03	6961.66	3963.97
H11	8	39213.1	6318.31	4189.86	6162.24	3208.93
H12	8	47373.7	6549.69	3981.07	5888.18	3721.95
A1	9	21616.5	4844.42	13304.6	94537.1	2256.07
A2	9	36205	5794.11	15597	101084	2957.54
A3	9	32316.5	7254.56	17796	103846	2799.47
A4	9	34734.3	5444.71	17175.4	96364.3	3031.2
A5	9	30691.6	4830.13	18088.9	100291	2631.46
A6	9	48691.2	8759.52	25169	128461	5238.47
A7	9	47561.2	5554.53	18893.5	101948	2833.36
A8	9	167336	25567.7	64184.5	332774	13185.9
A9	9	41785.3	6195.02	18822.7	104545	2839.23
A10	9	30088.3	5383.6	19009.1	115495	3088.98
A11	9	32597.3	5013.18	19684.7	130696	3110.55
A12	9	33942.1	5097.82	17778.7	129499	3024.32
B1	9	39689.6	7110.46	18498.2	124453	3300.53
B2	9	42849.8	7335.22	18638.9	111910	3098.89
B3	9	33207.9	5785.38	18991.5	107837	2625.43
B4	9	29930	4706.32	19367.9	107603	3223.31
B5	9	29540.9	4588.86	22105.3	123536	3275.07
B6	9	25093	3695.85	20533.4	110326	2122.45
B7	9	27781.6	4487	20262.1	107210	2330.95
B8	9	106896	14675.7	60343	330685	8148.93
B9	9	33135.8	5166.39	18267.6	100005	2381.77
B10	9	37872.1	6039.39	20512.9	118073	2518.57
B11	9	42718.6	6467.23	22713.1	140051	3940.96
B12	9	45969.8	8115.33	22936.2	148168	6104.52
C1	9	44283.7	8056.68	20054.5	126498	3883.65
C2	9	49071.9	8247.02	26065.9	158396	4070.9
C3	9	37365	5167.02	19107	108079	2407.46
C4	9	32021.6	5090.72	21635	115638	3124.85
C5	9	29799.7	4708.73	20101.8	102080	2885.77
C6	9	28262.9	4522.82	21848.5	110747	2303.5
C7	9	33353.3	5067.83	21038.6	106057	1865.07
C8	9	32974.6	4767.32	20410.8	103985	2339.6
C9	9	32486.9	6698.93	19499.5	98406	2348.4
C10	9	30413.2	5510.92	20169.6	112026	2361.92
C11	9	33164.5	6072.23	22799.5	137778	2351.31
C12	9	43289.4	6822.55	22193.5	141977	3237.44
D1	9	50805.6	8642.2	21638.9	134144	3424.91
D2	9	39695.5	6858.71	21409.3	125738	3009.27
D3	9	40668.1	7709.41	21708.7	114138	3540.28
D4	9	32500	5648.59	24295	124415	3950.48
D5	9	30408.7	5100.23	20951.1	105054	2408.6
D6	9	37754.8	6770.6	24002	114361	4432.64
D7	9	28127.3	4596.18	21169	104627	2439.86
D8	9	29935.2	6027.02	22653.9	110516	2461.41
D9	9	39808.6	7405.6	20990.1	104392	3947.47
D10	9	37956.6	6840.18	21965.4	113526	3440.78
D11	9	42852	8096.45	25859.4	145410	3337.23
D12	9	157648	20070.3	30746.9	156752	7511.4
E1	9	49482.8	8102.29	20092	125036	3977.28
E2	9	50307.2	8713.74	21818.8	121473	3922.42
E3	9	68321.2	8549.21	21781.3	114537	4586.31
E4	9	36187.3	6124.16	26279.1	136672	3296.97
E5	9	27901	4645.98	20802.6	104847	2942.84
E6	9	29382.5	4980.76	23822.5	118214	3627.5
E7	9	36831.2	6235.53	22020.2	105199	4737.25
E8	9	34979.7	6288.4	23291.8	114385	3758.19
E9	9	34210.1	7354.42	24440.5	107418	2306.82
E10	9	36429.2	6190.54	20797	112016	3325.41
E11	9	61192.8	11896	27188.1	138944	7437.31
E12	9	58641.2	9880.65	23569.5	136536	5671.39
F1	9	49760.2	9409.54	22831.7	140320	7724.12
F2	9	51976	8965.7	21961.7	126259	3586.97
F3	9	35918.1	6613.27	21179.7	119158	2731.78
F4	9	36496.8	6041.46	25287.6	133750	3242.92
F5	9	28239	4588.89	20660.6	107515	2173.23
F6	9	58216.4	10764.4	28245.9	128885	7139.23
F7	9	29350.7	4823.16	22261.1	112064	3330.78
F8	9	30813.6	4648.21	21909.8	112757	2194.53
F9	9	30919.5	4991.16	20086.2	107685	3167.49
F10	9	31874.7	5208.37	20713.4	115876	3701.41
F11	9	32439.5	5152.19	22804.9	137367	2277.46
F12	9	54585.2	9538.77	23061.4	135674	6248.34
G1	9	49247.7	8950.86	20801.6	135392	4143.52
G2	9	59214.5	10455.4	23886.6	140626	3518.14
G3	9	38920.7	6986.89	18459.7	105421	2948.11
G4	9	32176.9	5545.78	24499.6	136435	2843.16
G5	9	27389.6	4644.89	18926.4	101843	2791.74
G6	9	29760.1	5276.29	20969.4	108207	2672.75
G7	9	29563.5	4979.63	20782.3	109454	2531.92
G8	9	36941.7	6516.76	22722.1	119312	3678.99
G9	9	34377.3	5447.9	20203.7	111344	2403.76
G10	9	36831.2	7124.9	21247	117233	2692.33
G11	9	82598.4	14154.7	27635	146268	8569.01
G12	9	42716.2	6395.36	21019.6	137153	3176.79
H1	9	59011.6	9914.88	24026.9	156212	7633.6
H2	9	44787.2	7713.21	24255.7	154642	3888.23
H3	9	37353.5	6825.98	22463.1	132021	4987.04
H4	9	38399.4	7312.98	26156.8	147054	3237.36
H5	9	30037.5	5394.34	21035.4	117756	2348.8
H6	9	37941.2	6601.6	25208.2	135444	3813.87
H7	9	33031.5	9059.43	26488.6	136617	2640.82
H8	9	35400.9	6341.17	22118.7	122527	2669.83
H9	9	32937.2	5802.55	21889.7	127439	2971.46
H10	9	36297	8452.17	5637.66	7321.16	3828.52
H11	9	39315.6	6568.93	4099.01	5711.78	3392.78
H12	9	47125.8	6409.04	3789.62	5817.36	3713.48
A1	10	21701.1	4342.06	13224.4	94050.9	3126.79
A2	10	36163.6	5794.11	15653.7	100817	2986.61
A3	10	32370.3	6951.87	17889	103681	2619.42
A4	10	34914.8	5487.35	16963.1	95956.9	2843.27
A5	10	30644.2	4767.34	17972.9	99653	2447.77
A6	10	48570.1	8778.28	25084.1	128081	5248.94
A7	10	47322.4	5198.35	18971.8	101690	2959.96
A8	10	165718	25197.8	63566.7	330703	13869.4
A9	10	41285.5	6259.08	18488.8	104135	2626.61
A10	10	30039.8	5738.04	18964.3	114649	3055.82
A11	10	32853.5	4972.47	19353.8	130730	2970.01
A12	10	33827.2	5158.83	17741.2	128719	3177.88
B1	10	39948.5	6789.43	18640.2	124120	3863.87
B2	10	42146.3	7199.91	18852.7	111669	2694.91
B3	10	33335.2	6098.41	18881.7	107138	2672.63
B4	10	29846.9	4722.18	19464.3	107577	2988.22
B5	10	29604.7	4427.24	21979.3	123579	3661.22
B6	10	24577.5	3833.17	20585.9	110169	1871.31
B7	10	27905.6	4385.6	20152.5	107055	2087.74
B8	10	105898	14468	60354.3	329539	7932.07
B9	10	33153	5257.68	18337.7	99774.3	2367.03
B10	10	37283.9	6014.7	20409.6	118122	2399.11
B11	10	42428.1	6732.22	22869.4	139033	4168.43
B12	10	46245.7	8483.95	22575.6	147453	6281.63
C1	10	44442.7	8053	20062.6	126257	3921.78
C2	10	48749.4	8422.31	26074.3	158507	4640.79
C3	10	37200.5	5446.88	18705.4	107986	2200.46
C4	10	31861.9	5147.84	21667.1	115263	3074.1
C5	10	29498.9	4682.05	20021.3	102340	2623.98
C6	10	28537.2	4614.19	21817.1	110416	2496.17
C7	10	33239.9	5155.17	21148	105767	2022.55
C8	10	32803.2	4734.43	20311	103998	2469.03
C9	10	32439.3	6669.36	19471.5	97908	2781.36
C10	10	29918	5704.7	19955.7	111679	2163.02
C11	10	33066.9	5775.99	22663.3	137536	2585.45
C12	10	43212.4	6865.31	21984.9	141305	3011.02
D1	10	50210.8	8918.26	21726.8	133854	3226.78
D2	10	39808	6910.55	21324.1	125781	2709.44
D3	10	40310.4	7811.61	21756.3	113821	3772.01
D4	10	32219.1	5644.5	24245.2	124312	4112.27
D5	10	30230.3	4829.06	20871.5	104646	2037.13
D6	10	37726	6549.44	23896.9	114372	4278.88
D7	10	27799.7	4521.92	21074.9	104128	2342.38
D8	10	30378.8	6325.93	22655.8	110607	2277.74
D9	10	39187.4	7364.94	20955.8	103769	3730.35
D10	10	37929.7	6736.09	21969.2	113536	3416.59
D11	10	42470	8296.55	25636.8	145295	3485.28
D12	10	157231	20219.5	30672.2	156417	7692.25
E1	10	49449.2	8217.16	20258.8	124964	3827.29
E2	10	50044.8	8716.99	21746.1	121238	4207.14
E3	10	68261.4	8520.4	21713.2	114077	4447.99
E4	10	36282.8	6252.25	26319.4	136483	3048.13
E5	10	27968.3	4582.29	20776.8	104569	2838.82
E6	10	29239.8	5172.46	23895.3	117744	3622.92
E7	10	36718.5	6106.05	22018.3	105296	4518.56
E8	10	34934.8	6338.04	23557.6	114185	3381.98
E9	10	34131.1	7292.76	24493.1	107173	2609.78
E10	10	36341.8	6156.78	20917.1	112442	3200.55
E11	10	60723.2	11765	27000.5	138420	7447.83
E12	10	58073.3	9927.46	23336.8	136056	5632.42
F1	10	49461.9	9523.89	22852.6	140365	7559.53
F2	10	51407.6	8996.11	21887.9	126080	3530.77
F3	10	36041.7	6534.55	20908.6	118927	2623.66
F4	10	36416.8	6139.49	25371.1	134083	3339.45
F5	10	28274.5	4515.2	20695.5	107790	2042.65
F6	10	58074.4	10620.8	28093.2	128516	6718.34
F7	10	29180.3	4604.92	22068.4	111752	3302.75
F8	10	30699.7	4771.8	21814.5	112679	2179.68
F9	10	30887.1	4951.73	20005.9	107514	3286.61
F10	10	32198.4	5335.01	20611.5	115590	3728.49
F11	10	32359.8	5160.24	22654.5	137247	2571.96
F12	10	54529.3	9545.63	22890.3	135535	5852.8
G1	10	49309.1	8371.7	20688.7	135263	3551.96
G2	10	59179.9	10264.9	23841.3	140626	3608.94
G3	10	38841.6	6834.21	18587	105171	2557.57
G4	10	31821.5	5498.98	24480.3	136547	3040
G5	10	27435.4	4464.49	18885.9	101632	2560.61
G6	10	29728.8	5199.23	20963.6	107796	2544.7
G7	10	29177.1	5145.51	20814.5	109145	2582.12
G8	10	36739	6340.7	22831.1	118878	3440.73
G9	10	34150.2	5204.51	20228.6	111273	2387.12
G10	10	36640.7	6852.66	21203.1	117103	2837.93
G11	10	82038.8	13975.6	27613.3	145769	8791.3
G12	10	42428.6	6754.5	20846.5	136884	3163.11
H1	10	58685.8	10087.5	23875.6	156132	7596.4
H2	10	44658.3	7711.94	24315.3	154176	4013.88
H3	10	37287.8	6684.48	22526.7	132062	4936.27
H4	10	38269.8	7184.33	25988.4	147133	3287.71
H5	10	30033.8	5168.16	21051	117572	2529.71
H6	10	38202	6513.95	25201.5	135070	3690.75
H7	10	33071.9	8870.67	26471.4	136194	2411.43
H8	10	35189.2	6291.53	21924.3	122390	2849.91
H9	10	32766.5	5683.38	22025.1	126546	2636.34
H10	10	36252.3	8550.9	5677.72	7229.03	3918.16
H11	10	39464	6634.46	4047.57	6259.09	3266.46
H12	10	47598.5	6490.47	4085.62	5746.54	3647.12
A1	11	22065.6	4387.27	13285.7	93586.5	2668.36
A2	11	36109	6064.54	15736.4	100807	2531.28
A3	11	32236.7	7179.25	17846.6	103648	2364.35
A4	11	34264.5	5157.78	16935.8	95827.1	3165.29
A5	11	30490.8	4666.45	17790.5	99745.6	2839.69
A6	11	48168.4	8620.91	24928.3	128189	5207.09
A7	11	47316	5215.68	18788.7	101821	3022.32
A8	11	165055	24677	64012.6	330143	13553.7
A9	11	41282.1	6280.44	18503.1	104532	2900.54
A10	11	30052.9	5616.48	18871.4	114529	3272.44
A11	11	32349.6	4778.5	19543.5	130458	3258.06
A12	11	33863.7	5432.62	17787.1	128411	3020.05
B1	11	40082.4	7242.06	18654.7	124557	3205.79
B2	11	42070.8	7027.42	18487.5	111365	3316.52
B3	11	33524.1	5974.48	18779.5	107409	2621.89
B4	11	30155.9	4761.83	19316.3	107287	2784.4
B5	11	29558.5	4669.67	21928.7	123073	2985.45
B6	11	24950.7	3801.55	20744.3	109635	1884.01
B7	11	27989.8	4307.8	20137.1	107038	2204.02
B8	11	106478	14594.8	60103.8	329637	7971.78
B9	11	33143.4	5230.3	18068.4	99642.6	2444.4
B10	11	37231.5	6061.12	20476.1	118043	2414.9
B11	11	42227.3	6609.65	22720	138876	3621.11
B12	11	45891.9	8171.49	22775.9	147069	5890.87
C1	11	44211.1	7991.65	19964.7	126452	3903.84
C2	11	48903.8	8468.26	26094.7	158203	4431.55
C3	11	37172.6	5283.82	18750.6	107679	2369.21
C4	11	31986.7	5273.92	21652.7	115446	3503.85
C5	11	29915.3	4505.16	20018.2	101831	2810.55
C6	11	28418.5	4606.71	21735	110339	2795.99
C7	11	33161.2	4970.18	21101.2	105733	2014.31
C8	11	32837.3	4889.38	20332.8	103900	2446.56
C9	11	32328.1	6446.73	19345.8	97641.1	2779.56
C10	11	30221.5	5625.42	19941.7	111048	2411.64
C11	11	33152	6039.43	22511.8	137418	2656.13
C12	11	42919.7	6841.56	22155.5	141125	3018.13
D1	11	50270.3	8812.9	21688.8	133665	3573.02
D2	11	40000.5	6996.94	21332	125740	2813.39
D3	11	40418.1	7885.37	21635.8	113581	3569.77
D4	11	32195	5803.03	24118	124682	3850.03
D5	11	30157.3	4953.78	20988.9	104686	2193.91
D6	11	37718	6482.05	23809.1	114078	4365.31
D7	11	27664.8	4643.67	20980.9	104281	2565.59
D8	11	30273.3	6556.76	22659.5	110353	2452.09
D9	11	39350.9	7362.29	20875.1	103703	3575.39
D10	11	37710.9	6879.57	21941.4	113423	3335.31
D11	11	42599.1	8305.88	25837.7	145533	3241.32
D12	11	156679	20046.9	30520.8	155745	7478.61
E1	11	49368.7	8074.73	20109.4	124959	3932.18
E2	11	50101.9	8676.91	21712.3	120940	3639.79
E3	11	68316.7	8257.36	21753.3	114008	4319.08
E4	11	36123.7	6246.02	26391.9	137199	3111.98
E5	11	28220.3	4519.48	20848.7	104675	2709.27
E6	11	29372.3	5050.71	23958.1	117638	3665.09
E7	11	36394	6213.2	22024.9	105236	4717.37
E8	11	34834.9	6258.62	23465.2	114128	3634.38
E9	11	33988.1	7413.44	24529.4	107233	2516.27
E10	11	36372.4	6048.39	20771.7	112061	3127.1
E11	11	60511.9	11460.5	26936.4	138301	7383.79
E12	11	57697.5	9737.7	23322.1	136021	5710.35
F1	11	49562.8	9571.06	22562.2	140145	7268.63
F2	11	51460.9	8920.61	21895	125802	3323.32
F3	11	35926.8	6404.82	21001.6	119314	2651.59
F4	11	36269.3	6111.84	25303	133955	3228.14
F5	11	28334.9	4396.98	20525.1	107633	1879
F6	11	57816	10620.8	28093.2	128727	6782.11
F7	11	29248.6	4787.31	22140.2	111603	3305.22
F8	11	30938.4	4788.23	21995.3	112445	2530.18
F9	11	31032.5	4887.36	19964.5	107285	2938.63
F10	11	32017.3	5454	20703.1	115299	3675.2
F11	11	32413.6	5174.32	22724.8	136805	2296.36
F12	11	54009.9	9288.24	22847.7	134934	6000.92
G1	11	49369	8592.94	20496.7	135042	4191.21
G2	11	59203.8	10139.6	23836.9	140837	3419.69
G3	11	38567.5	7124.12	18546.3	105216	2553.14
G4	11	32299.1	5362.62	24558.1	136417	2733.72
G5	11	27260.5	4511.72	18992.6	101657	2699.44
G6	11	29603.6	5200.67	20888.8	107869	2443.45
G7	11	28866.4	5070.87	20820.7	108926	2577.42
G8	11	36563.9	6531.5	22769.5	118795	3729.86
G9	11	33818	5415.33	20167.6	111521	2598.23
G10	11	36170.1	7061.32	21101	117117	2643.79
G11	11	81666.9	13840.5	27409.6	145610	8758.61
G12	11	42130.4	6490	20877.3	136576	3103.79
H1	11	58514.2	9744.02	23800	154724	8124.94
H2	11	44431.4	7715.76	24366.8	154082	3616.18
H3	11	37449.5	6730.2	22337.8	132125	4925.9
H4	11	37858	7258.55	26001.2	146834	3410.32
H5	11	29747.5	5284.27	20955.5	117417	2497.43
H6	11	37988.4	6501.76	25088.9	134977	3731.28
H7	11	32821	8943.03	26408.4	135999	2582.08
H8	11	35031	6343.97	21934	122591	2877.07
H9	11	32735.3	5995.33	21894.9	126556	2738.71
H10	11	36065.3	8321.21	5711.92	7143.92	4100.42
H11	11	39319.2	6458.57	4174.54	6092.42	3548.44
H12	11	47175.4	6428.29	3823.56	5815.94	3679.59
A1	12	21718	4648.5	13438.2	93151.6	2371.4
A2	12	35935.8	6012.72	15436.1	100442	2888.35
A3	12	31498.7	7118.14	17934.1	103296	2394.36
A4	12	34488.5	5233.84	16942.6	95636.4	2733.47
A5	12	30455.9	4786.9	17854.8	99906.2	2698.25
A6	12	48359.9	8603.2	24741.4	127570	5336.82
A7	12	46822.2	5214.71	18789.7	101481	2859.82
A8	12	164974	25143.7	63234.5	328331	14675.6
A9	12	41008	6319.08	18300.5	103831	2812.53
A10	12	29580.8	5494.93	19028.1	114048	3248.12
A11	12	32352.5	4977.26	19479.9	129970	2548.38
A12	12	33974.9	5249.59	17885.8	128298	3122.43
B1	12	39652.3	7116.44	18460	124021	3572.89
B2	12	42051.1	7360.5	18404	111328	2804.38
B3	12	33677.4	6076.69	18890.6	107651	2669.09
B4	12	29601.1	4853.6	19349.6	106924	3277.23
B5	12	29545.3	4544.68	21767.4	123079	3441.59
B6	12	24868.5	3789.8	20459.3	110461	1744.38
B7	12	27882.1	4372.49	20157.9	107424	2454.34
B8	12	106316	14708.1	60427.5	328500	8585.69
B9	12	32949	5269.55	18158.2	99476.4	2611.11
B10	12	37089.3	6156.92	20383.8	117703	2795.01
B11	12	42293.8	6484.74	22695.9	138689	4043.72
B12	12	45489.4	8152.77	22664	146989	6179.02
C1	12	44331.3	7790.41	19927.8	126210	3926.27
C2	12	49162.8	8486.98	26011.7	158128	4218.9
C3	12	37011.6	5421.44	18772.7	107816	2202.71
C4	12	31943.3	5062.71	21610.6	115482	2811.72
C5	12	29618.4	4573.35	19890.1	102344	2656.08
C6	12	28660.6	4766.19	21753.4	110263	2506.54
C7	12	32987.6	4990.03	21048.6	106063	2040.69
C8	12	32979.7	4902.37	20263.8	103949	2238.94
C9	12	32644	6536.3	19505	97671.3	2552.73
C10	12	29947.6	5803.54	19995.7	111387	2526.01
C11	12	33234.8	6007.73	22663.3	137210	2299.4
C12	12	43363.9	6725.15	21876.6	141058	3455.56
D1	12	50240.5	9105.82	21769.8	133853	3570.13
D2	12	39468.2	6759.64	21442.9	125528	2813.39
D3	12	40358.1	7576.65	21784.9	113812	3477.08
D4	12	32445.2	5704.84	23981.3	124721	3637.49
D5	12	30502.8	4750.64	21065.5	104957	2339.7
D6	12	37663.6	6440.58	23802.7	114102	4066.89
D7	12	27984.4	4641.94	21209.1	103913	2633.92
D8	12	30317.3	6510.77	22730.3	110706	2381.23
D9	12	39285.5	7259.74	20949.3	103808	3876.69
D10	12	37939.9	7038.99	21916.5	113687	3406.91
D11	12	42289	8046.68	25615.1	144924	2980.68
D12	12	155730	19915.2	30338.2	155637	7598.85
E1	12	49335.1	7789.87	20101.8	124710	3972.03
E2	12	50198.2	8774.41	21560.5	120939	4159.17
E3	12	67662.2	8306.62	21634	113884	4534.56
E4	12	35835.7	6133.94	26281.8	136580	3013.38
E5	12	28254.4	4551.32	20779.5	104667	2749.93
E6	12	29165.3	4969.53	23816.2	117861	3665.09
E7	12	36384.2	6248.03	21976.9	105016	4550.75
E8	12	34585.4	6188.23	23500.1	114168	3701.56
E9	12	34335.6	7519.14	24292.6	107185	2686.46
E10	12	36337.4	6179.88	20738.3	111660	2988.46
E11	12	60396.5	11639.7	26910.6	137881	7137.18
E12	12	57295	9456	23199.3	135638	5968.18
F1	12	49467.8	9682.55	22648.5	140364	7586.32
F2	12	51397.2	8661.6	21963.7	125865	3618.65
F3	12	35911.2	6657.11	20990.1	119258	2720.06
F4	12	35987.1	6092.57	25159.8	133675	2995.07
F5	12	28125	4524.11	20658.1	107998	2207.14
F6	12	57768.9	10431.1	28052	128701	6825.16
F7	12	29200.4	4746.78	21944.3	111314	3276.36
F8	12	30779	4980.67	21871	112636	2283.59
F9	12	30765.8	5016.1	19962	107192	3328.29
F10	12	31875.6	5429.35	20547.2	115103	3434.96
F11	12	32210.9	5335.3	22739.6	136684	2969.95
F12	12	54300.3	9525.04	22841.1	134769	5936.38
G1	12	48819.3	8488.66	20747.1	134730	4100.99
G2	12	58962.9	10256.7	23674.4	140713	3372.65
G3	12	38466.8	7131.39	18420.8	105292	2739.11
G4	12	32243.5	5285.16	24405.7	136329	2951.79
G5	12	27140.2	4612.37	18843.1	101468	2487.24
G6	12	29513.8	5158.17	20781.7	107595	2479.93
G7	12	29343.4	5039.2	20780	108601	2644.87
G8	12	36857.2	6479.91	22840.2	118548	3874
G9	12	34078.1	5240.51	20015.4	111152	2535.16
G10	12	36490.6	6964.6	21012.3	117332	2683.17
G11	12	81298.5	13632.2	27483.7	145544	8583.17
G12	12	41957.9	6593.13	20707.6	136535	3053.6
H1	12	58383.1	9975.39	23711.7	155353	8019.54
H2	12	44349.5	7714.49	24124.6	153607	4095.72
H3	12	37192.9	6794.42	22352.2	131506	4778.77
H4	12	38252.7	7129.91	25850.3	146449	3019.75
H5	12	29844.9	5482.55	20865.9	117496	2739.14
H6	12	38251.4	6513.19	25130.2	134770	3761.1
H7	12	32949.8	9053.14	26332.2	135621	2436.83
H8	12	35085.8	6181.75	22016.6	122259	2632.67
H9	12	32550.8	5833.22	21906.9	125914	2415.84
H10	12	36305.1	8394.75	5897.56	7277.1	4169.14
H11	12	39356.6	6403.38	4225.98	5840.16	3379.25
H12	12	47638.1	6428.29	3758.39	6294.7	3464.97
A1	13	21868.3	4653.52	13188.2	93359.7	2922.08
A2	13	35395.5	6001.39	15623	100294	2709.81
A3	13	31956.5	6985.98	17791.9	103013	2864.48
A4	13	34370.8	5090.95	16839.9	95524.7	2765.14
A5	13	30587.8	4818.81	17825.8	99529.4	3004.71
A6	13	47907.5	8666.77	24826.2	127792	4952.85
A7	13	46868.3	5276.32	18833.8	101296	2987.36
A8	13	164053	24469.2	62762.4	328611	13477.1
A9	13	41103.6	6241.79	18399.3	103687	3140.85
A10	13	29769.6	5467.66	18932.9	113722	3102.24
A11	13	32285.2	4883.87	19389.6	129882	2856.18
A12	13	33604.7	5334.41	17628.5	127401	2556.52
B1	13	39239.8	7262	18490.9	123445	4022.89
B2	13	42141.3	7306.97	18524.3	111093	3448.14
B3	13	33786.9	6217.24	18771.9	107753	2644.31
B4	13	29554.3	4828.68	19529.6	107106	2994.69
B5	13	29300.9	4616.87	21925.2	122869	3178.53
B6	13	24790.9	3799.74	20218.4	109696	1996.43
B7	13	27531.7	4341.02	20145.2	107316	2222.66
B8	13	106001	14700	59704.1	328163	8704.81
B9	13	32797.7	5355.37	18141.3	99264.4	2415.85
B10	13	37260.4	5998.9	20431.4	117565	2359.62
B11	13	42241.3	6502.25	22647.6	138241	4088.76
B12	13	45507.2	8226.21	22762.1	146874	6179.02
C1	13	44326.3	7822.32	20034.9	126320	3728.89
C2	13	49111.3	7841.99	25986.3	158196	4171.27
C3	13	37110.1	5221.37	18872.5	107665	2525.58
C4	13	31556.2	5192.02	21654.9	115194	3210.16
C5	13	29592.4	4831.27	20053.3	101686	2631
C6	13	28492.3	4627.48	21673	109825	2459.02
C7	13	32730.7	4941.59	21087.9	106127	1872.49
C8	13	32743.5	4826.19	20352.7	103746	2450.16
C9	13	32636.3	6532.83	19406.4	97588.1	2817.36
C10	13	29911	5469.81	20065.6	111003	2062.58
C11	13	32998.8	6000.08	22571.7	136833	2335.85
C12	13	42687.3	6912.82	21910	140390	3134.3
D1	13	49743.9	8884.55	21752.8	133207	3424.91
D2	13	39769.7	6766.55	21548.2	125212	3088.06
D3	13	40180.3	7499.74	21631.5	113371	3757.26
D4	13	32207.5	5787.69	24148.8	125161	3585.68
D5	13	30312.9	5102.12	20972	104965	2461.53
D6	13	37513.9	6571.04	23833.8	113984	4388.06
D7	13	27645.6	4739.51	21097.7	103883	2510.01
D8	13	30503.4	6547.03	22509.5	110731	2620.84
D9	13	38995	7225.26	20793.4	103627	3991.47
D10	13	37614.4	6711.71	21906.9	113118	3682.68
D11	13	42253	8017.65	25590.4	144756	3357.04
D12	13	154483	19871.4	30217.2	155256	7490.53
E1	13	49031.2	8194.18	19956.7	124866	3823.09
E2	13	49779.2	8826.4	21677.5	121007	3826.47
E3	13	67484.7	8347.52	21576.1	113707	4473.4
E4	13	36098.4	6354.54	26268.1	136528	2978.64
E5	13	28302.2	4716.75	20744.5	104337	2456.78
E6	13	29249.2	5079.2	23847.1	118084	3512.91
E7	13	35985.9	6339.11	21806.4	104825	4362.36
E8	13	34760.9	6360.6	23357.8	114092	3540.33
E9	13	33893.4	7427.53	24338	106764	2283.44
E10	13	36328.7	6306.03	20724.8	111828	3102.31
E11	13	59938.7	11579	26745	137890	7113.29
E12	13	57303.6	9958.39	23153.7	135255	5739.37
F1	13	49276.4	9472.44	22738.8	140382	7468.94
F2	13	51262.4	8787.44	22036.4	125600	3184.33
F3	13	36077.3	6405.72	20983.9	119355	2859.72
F4	13	36125.8	5989.52	25284.2	133809	3210.74
F5	13	28194.5	4533.01	20687.2	107994	2157.96
F6	13	57634.6	10495.4	28111.9	128721	6668.12
F7	13	29264.4	4832.52	22073.3	111295	3158.47
F8	13	30859.1	4986.93	21805.6	112314	2304.21
F9	13	30789.9	5196.34	20049.8	107450	3053.49
F10	13	31544.4	5391.96	20541.2	114540	3606.19
F11	13	32143.7	5057.61	22615.9	136374	2302.33
F12	13	54068.5	9399.78	22766.6	134363	5778.33
G1	13	48905.6	8377.34	20535.6	134713	3870.3
G2	13	58748.3	10278	23803.7	140491	3325.61
G3	13	38326.6	6930.55	18545.5	105513	2461.92
G4	13	32054	5525.61	24408.1	136357	2915.04
G5	13	27376.4	4548.11	18892.2	101168	2417.83
G6	13	29555	5192.02	20850.7	107654	2342.94
G7	13	29188.4	5208.1	20709.6	108611	2685.66
G8	13	36941.7	6699.37	22588.1	118566	3757
G9	13	33911.2	5231.08	20117.7	111233	2352.95
G10	13	36139.4	6903.7	21212.1	116668	2406.61
G11	13	80485.2	13645.7	27253.9	145087	8244.29
G12	13	42118.3	6595.55	20766.8	136203	3088.96
H1	13	58282.9	9695.97	23796.8	154275	7715.75
H2	13	44662.3	7604.88	24199.5	154165	4009.26
H3	13	37077.5	6635.5	22276.2	131529	4913.47
H4	13	38138.5	7371.53	26052.2	146581	3069.28
H5	13	29630	5419.97	20922.9	117035	2471.16
H6	13	37636.2	6449.93	25055.2	134675	3895.7
H7	13	32789.6	9049.21	26382	135460	2686.07
H8	13	34953.9	6129.31	21947.2	122361	2584.07
H9	13	32654.8	5870.03	21781	125462	2532.21
H10	13	36531.7	8787.64	5780.31	7324.17	4146.24
H11	13	39490.5	6440.17	4232.55	6397.6	3208.93
H12	13	47710.8	6540.8	3860.23	5671.47	3765.72
A1	14	21441.8	4494.44	13255.8	93044.4	2939.38
A2	14	35610.1	5805.44	15548	100179	2871.74
A3	14	31684.4	7234.67	17755	103033	2410.62
A4	14	34087.9	5277.63	16968.9	94882.6	3042.82
A5	14	30455.9	4730.28	17785.4	99133.2	2804.33
A6	14	47983.5	8557.34	24804.8	127536	5304.39
A7	14	47536.6	5269.58	18749.6	100644	3202.77
A8	14	162897	24950.2	63024.7	327502	13844.9
A9	14	40706.3	6135.02	18227.2	104039	2724.51
A10	14	30205	5468.8	18906.1	113369	3416.11
A11	14	32515.7	4941.34	19579.4	129330	2966.52
A12	14	33911.1	4969.85	17685.5	127410	3068.4
B1	14	39156.4	6743.57	18405.4	123147	3275.15
B2	14	41708.4	6733	18385.6	111442	3084.56
B3	14	33578.8	5987.26	18716.3	107423	2724.55
B4	14	29926.5	4691.59	19517	106853	2788.72
B5	14	29550.8	4492.97	22049.9	122795	3068.71
B6	14	24848.2	3869.31	20568.1	110057	2185.92
B7	14	27825	4414.45	20003.9	107390	2434.81
B8	14	106375	14335.9	59799.8	325693	8121.44
B9	14	32726.8	5278.68	18001	99155.1	2758.47
B10	14	37282.8	5945.56	20246.7	117319	2912.5
B11	14	41698.9	6706.54	22523.5	138073	4007.93
B12	14	46145.1	8263.64	22578.4	146241	6337.85
C1	14	43660.2	7952.38	19818.4	126136	3694.12
C2	14	49071.9	8187.46	26010	157695	3856.55
C3	14	37225.9	5119.6	18856.2	107794	2386.08
C4	14	31591.1	5124.13	21666	115523	3309.49
C5	14	29571.2	4465.64	19928.3	102082	2765.41
C6	14	28418.5	4607.54	21617.1	110053	2382.12
C7	14	32814	4822.5	21068.7	105946	1994.52
C8	14	32824.5	4937	20334.6	103874	2353.09
C9	14	32528.5	6685.01	19266.2	97531.5	2569.83
C10	14	29712.3	5609.77	19984.7	110573	2441.48
C11	14	32965.8	6088.62	22406.1	136604	2325.91
C12	14	42932.5	6552.93	21820.2	140059	3139.04
D1	14	49951.4	8812.9	21644.9	133498	3493.19
D2	14	39352.2	6958.93	21370.1	125083	2919.54
D3	14	40091.9	7649.35	21591.3	113096	3660.36
D4	14	32471.2	5845.98	24129.7	125275	3969.52
D5	14	30548.5	4906.54	20689.3	105132	2566.38
D6	14	37311.4	6424.17	23822.9	114029	4257.04
D7	14	27599	4362.18	21031.1	103884	2470.84
D8	14	30382.9	6727.44	22578.4	110820	2191.03
D9	14	38606.3	7548.82	20801.7	103301	3708.35
D10	14	37552.3	6666.69	21882	112853	3525.93
D11	14	42007.5	8286.19	25855.2	144576	3548.87
D12	14	153584	19669.5	30432.8	155015	7431.9
E1	14	48791	8201.08	20068	124657	4068.53
E2	14	49573	8589.17	21557.4	121031	4015.24
E3	14	67031.7	8316.84	21523	113510	4365.18
E4	14	35976	6098.36	26285.5	136631	2953.28
E5	14	28054.2	4477.02	20609	104097	2435.98
E6	14	28983.5	5094.74	23864.4	117435	3526.66
E7	14	36106	6205.17	21847.8	105025	4310.29
E8	14	34864.9	6024.88	23419	113776	3711.16
E9	14	33875.1	7410.79	24354.3	106544	2308.69
E10	14	36250.1	6035.06	20673.3	111872	2971.02
E11	14	59637.4	11615.6	26812	137587	7153.43
E12	14	57043.3	9643.24	23163.5	134786	5504.75
F1	14	49220	9736.87	22868.3	140454	7435.77
F2	14	50857	8688.87	21965.7	125238	3446.97
F3	14	35680.6	6391.4	21020.2	119545	2632.67
F4	14	36255.1	5897.36	25245.9	133866	3245.53
F5	14	28183.9	4454.47	20657.3	107908	2377.58
F6	14	57303.5	10465.1	28090.1	128722	6820.37
F7	14	28952.3	4813.81	21991	111095	3443.73
F8	14	30729.1	4994.75	21739.4	112171	2156.59
F9	14	30731.9	4894.6	20068.8	107177	2941.18
F10	14	31767.4	5321.41	20526.6	114217	3748.58
F11	14	32274	5249.78	22485.3	136323	2673.45
F12	14	53873.4	9417.79	22719.9	134266	5837.91
G1	14	49018.1	8831.08	20421.5	134452	3874.16
G2	14	58735.2	10264.9	23800.4	140768	3607.85
G3	14	38211.5	6920.55	18473.8	105463	2932.17
G4	14	32360.1	5465.09	24363.2	136162	2893.8
G5	14	27348.3	4489.26	18756.7	101282	2409.94
G6	14	29519.7	5269.09	20896.8	107442	2517.15
G7	14	29218.8	5061.82	20675.9	108323	2845.67
G8	14	36620.8	6684.63	22658.8	118234	3740.04
G9	14	34006.1	5386.19	19929.4	110946	2406.39
G10	14	36404.5	6878.63	21067.9	116897	2608.08
G11	14	80716.9	13578.1	27480.4	145322	8542.86
G12	14	41937.8	6488.78	20713.3	135470	2889.34
H1	14	58631.8	10249.5	23618.8	154066	7805.65
H2	14	44530.7	7618.9	24171.4	153973	3831.74
H3	14	36927.7	6667.06	22256.7	131448	4622.31
H4	14	37980.4	7146.4	25836.7	146048	3238.99
H5	14	29859.8	5174.95	20900.7	117078	2651.32
H6	14	37783.8	6571.87	25171.4	134466	3650.98
H7	14	32833	9099.54	26371.1	135056	2440.8
H8	14	34819.3	6120.22	21986.8	122138	2674.83
H9	14	32564.7	5676.37	21778.4	124889	2749.21
H10	14	36328.5	8586.16	5799.85	7072.82	4213.96
H11	14	39337.3	6585.02	4192.05	6064.26	3396.17
H12	14	47510.9	6311.33	4023.16	6188.47	3435.32
A1	15	21594	4661.89	13095.5	93028.9	2681.34
A2	15	35856.7	5662.94	15468.3	99994	3281.39
A3	15	31614.4	7018.66	17627.7	103310	2138.05
A4	15	33976.5	5239.6	16889	94886	2907.67
A5	15	30678	4708.66	17760.5	98886.2	2531.27
A6	15	47852.5	8634.46	24682.3	127191	5097.23
A7	15	51364.5	5175.24	18806.4	100790	2806.91
A8	15	162954	24765.2	62715.7	326161	13467.9
A9	15	40806.5	5993.67	18406.4	103580	2766.05
A10	15	30092.2	5594.9	18927.3	113473	3125.45
A11	15	32222.2	4972.47	19364.2	128800	2787.65
A12	15	33529.9	5176.68	17741.2	126854	2569.32
B1	15	39101.6	6933	18350.8	123082	3513.68
B2	15	41788.7	7240.06	18331.8	110567	3119.74
B3	15	33302.3	5816.04	18899.4	107218	2651.39
B4	15	29746.2	4684.79	19195.9	106348	2981.75
B5	15	29199.7	4684.75	21756.8	122982	3106.12
B6	15	25081	3803.36	20561.5	109593	1998.24
B7	15	27784.3	4246.61	20073.7	107082	2410.84
B8	15	105512	14799.8	59504.2	325670	7953.45
B9	15	32731.6	5452.14	18159.1	99101.9	2623.08
B10	15	37073.2	6031.49	20198	117216	2280.63
B11	15	41945.8	6433.38	22359.2	137882	3868.21
B12	15	45901.6	8200.29	22466.4	145751	6233.84
C1	15	43602.6	7832.13	19683.6	125864	3621.23
C2	15	48733.9	8141.51	25685.1	157486	4370.31
C3	15	36895.7	5345.11	18865.5	107384	2171.21
C4	15	31524.5	4977.57	21661.6	114997	3117.3
C5	15	29547.1	4468.6	19981	101542	2849.67
C6	15	28558	4547.74	21663.4	110077	2328.55
C7	15	32686.7	4995.58	21137.1	106196	1560
C8	15	32664.2	4661.71	20232.1	103974	2467.24
C9	15	32475.8	6293.67	19230.9	96935.7	2702.15
C10	15	29988.1	5617.59	19892.8	111023	2546.89
C11	15	33152	5902.79	22427.9	136171	2306.03
C12	15	42944.1	6678.83	21792.5	139856	3440.15
D1	15	49836.6	8859.26	21552.9	133294	3422.98
D2	15	39311.7	6928.98	21397	125481	2702.87
D3	15	39959.7	7545.04	21548	112664	3404.39
D4	15	32434.6	5564.73	24106.4	125250	3795.04
D5	15	30457.1	5155.03	21178	104679	2411.6
D6	15	37390.6	6342.1	23949.9	113868	4072.35
D7	15	27603.8	4627.26	21112.4	103560	2468.1
D8	15	30657.1	6584.17	22681.9	110824	2297.32
D9	15	38560.6	7356.98	20802.7	102996	3883.39
D10	15	37496.7	6978.04	21951.9	112922	3073.09
D11	15	41913.3	8265.45	25739.8	144132	3272.6
D12	15	153083	19545.7	30102.7	154785	7366.32
E1	15	49241.4	7872.57	19978.5	124747	3952.1
E2	15	49544.4	8605.42	21596.4	120446	3908.86
E3	15	66923.8	8339.15	21636.8	113378	4267.32
E4	15	35560.8	6119.71	26176.4	136353	3252.84
E5	15	27985.3	4565.48	20642.2	104308	2674.28
E6	15	29104.2	5061.07	23882.6	117621	3394.65
E7	15	35923.4	6168.55	21892.1	104879	4569.68
E8	15	34523.9	6219.82	23321	113907	3332.08
E9	15	33654.8	7539.4	24228.2	106613	2344.22
E10	15	36474.6	5974.65	20631.8	111783	2841.56
E11	15	59276.4	11628.1	26738.3	137352	7259.53
E12	15	56998.5	9605.63	23157.8	134508	5784.14
F1	15	49055.3	9475.29	22494.1	139917	7567.18
F2	15	51016.8	8840.92	21771.8	125786	3583.91
F3	15	35760.6	6469.24	21087.6	119748	2399.32
F4	15	35834.9	6015.49	25326	134030	3115.95
F5	15	28390	4449.61	20698	107946	2224.1
F6	15	57145.6	10371.4	27936.7	128550	6548.55
F7	15	29014.1	4735.09	21878.2	110560	3394.26
F8	15	30738.6	4838.3	21724	112199	2262.15
F9	15	30907.5	4971.04	19872.7	106913	3010.1
F10	15	31751.5	5256.82	20364.7	114158	3571.24
F11	15	32246.1	5011.33	22484.3	136378	2901.29
F12	15	53973.2	9351.73	22613.5	133487	5590.49
G1	15	48793	8886.04	20482.4	134185	3715.64
G2	15	58542	10259	23661.2	140499	3755.53
G3	15	38526.1	7073.23	18485.3	105800	2547.83
G4	15	32236.4	5498.18	24499.6	135977	2742.7
G5	15	27243.5	4511.72	18869.6	101104	2541.67
G6	15	29492.4	5215.07	20882.2	107237	2459.83
G7	15	29156.6	5214.13	20819.1	108109	2316.22
G8	15	36702.9	6711.66	22637.2	118020	4078.35
G9	15	33739.1	5218.22	19966.4	110610	2365.22
G10	15	35855.8	6764	21175.4	116709	2677.67
G11	15	80557	13529.7	27249.5	144839	8537.41
G12	15	42367.1	6447.53	20681.4	135856	3362.72
H1	15	58294.4	9767.16	23431.3	153551	7084.91
H2	15	44407.2	7789.68	24180.8	153436	3842.12
H3	15	36882.4	6433.04	22245.4	131614	4642
H4	15	37788.3	7376.48	25828.8	145384	3185.4
H5	15	29811.4	5294.82	20850.4	116766	2561.99
H6	15	37804.8	6754.02	25087.4	134246	3931.65
H7	15	32645.8	9318.97	26147.8	134400	2527.32
H8	15	34636	6238.39	21821.5	121859	2626.24
H9	15	32484.1	5632.56	21613.7	124537	2571.59
H10	15	36189.3	8505.56	5618.12	7264.08	4239.86
H11	15	39863.3	6459.72	4245.68	6138.59	3314.96
H12	15	47456.3	6674.05	3853.44	5974.59	3538.4
A1	16	21563.9	4655.19	13049.9	92592.5	2354.1
A2	16	35519.8	6244.29	15731.8	100269	2999.06
A3	16	31449.9	7220.46	17891.7	102376	2360.6
A4	16	34324.7	5137.04	16732.7	94681.7	2914.01
A5	16	30145.8	4592.33	17875.5	98700.9	2968.37
A6	16	47591.6	8453.12	24686.6	127293	5196.62
A7	16	55078.8	5589.19	18736.8	100922	2914.61
A8	16	163035	24921.7	62476.8	324040	13541.5
A9	16	40397.7	6017.06	18259.8	103179	2892.63
A10	16	29862.7	5532.42	18655.3	113229	3295.65
A11	16	32219.4	5022.76	19466	128928	2558.83
A12	16	33785.2	5060.62	17675.8	126594	3341.39
B1	16	39171.8	6765.51	18152.4	123194	3413.87
B2	16	41185.2	7308.46	18296.4	110583	3167.96
B3	16	33140.8	6316.9	18739.1	107011	2815.41
B4	16	29907.7	4776.56	19216.5	106612	3176.94
B5	16	29168.9	4355.05	21703.9	122497	3332.99
B6	16	24961.8	3935.25	20484.6	110037	1873.13
B7	16	27566.1	4147.83	20161.5	107490	2402.85
B8	16	104985	14438.4	59574.6	325084	7611.37
B9	16	32611.9	5291.46	18029.1	98973	2361.51
B10	16	36688.2	5852.73	20363.9	116796	2827.59
B11	16	42060.9	6392.52	22454.6	137786	4001
B12	16	45721.5	8014.54	22477.5	145280	6247.89
C1	16	43709	7599	19833.4	125859	3869.07
C2	16	48437.1	8173.84	25815.4	157157	4399.23
C3	16	36571.3	5267.63	18836.5	107376	2182.46
C4	16	31604.8	5019.6	21690.4	115083	3371.04
C5	16	29418.9	4565.44	19960.4	101312	2750.36
C6	16	28368	4434.77	21755.1	109893	2610.23
C7	16	32821.7	5147.23	21081.2	106326	1901.35
C8	16	32757.1	4735.29	20257.5	103711	2444.77
C9	16	32099.7	6424.12	19299.7	96969.5	2456.42
C10	16	29937.7	5529.51	19782.8	110785	1933.29
C11	16	33270	6276.64	22464.9	135868	2387.76
C12	16	42634.7	6520.86	21672.7	139382	3002.72
D1	16	50049.6	8793.93	21439	132769	2983.45
D2	16	39429.9	7180.1	21371.2	125134	2786.04
D3	16	39936.4	7252.14	21480.3	113083	3709.86
D4	16	32448.1	5744.73	24158.3	125369	3961.06
D5	16	30373.6	4952.84	21011.8	104613	2203.89
D6	16	37412.2	6507.97	23698.5	113892	4279.79
D7	16	27586.1	4611.72	20883.1	103855	2511.84
D8	16	30906.3	6722.13	22666	111061	2268.41
D9	16	38666.1	7231.45	20561.4	102761	3640.44
D10	16	37317.7	6958.34	21656.8	113114	3533.67
D11	16	41981	8101.63	25674.9	143816	3144.36
D12	16	152788	19636.4	29986.3	154106	7065.23
E1	16	49079.3	8026.49	20071.2	124997	3900.71
E2	16	49420.6	8633.58	21445.6	120587	3771.2
E3	16	66341.5	8171.85	21553.7	113504	4232.51
E4	16	35483.3	6109.93	26287.3	136281	2958.92
E5	16	28622.4	4690.21	20579.5	104027	2896.51
E6	16	29287.6	5072.29	23774.3	117816	3743.93
E7	16	36355.9	6280.17	21937.3	104910	3977.05
E8	16	34528.9	6114.23	23327.6	114121	3519.22
E9	16	34032.2	7469.81	24148.4	106454	2188.06
E10	16	36697.3	6089.26	20742.8	111446	3047.22
E11	16	59626.6	11424.8	26752.7	137502	7126.67
E12	16	56648.6	9654.95	23087	134230	5862.06
F1	16	49114.6	9523.89	22664.2	140322	7636.08
F2	16	50727.4	8620.71	21752.6	125352	3461.28
F3	16	35903.3	6571.23	20988.4	120009	2774.12
F4	16	36099.7	5962.71	25289.3	134399	3220.31
F5	16	28236	4537.06	20573.3	108081	2107.94
F6	16	57072.8	10346.5	27889.2	128905	6523.83
F7	16	29187.5	4737.42	21923.3	110573	3400.86
F8	16	30575.6	4907.92	21691.7	112294	2600.28
F9	16	30754.5	4897.01	19909.9	107111	2980.32
F10	16	31676.9	5367.31	20348.4	114171	3614.05
F11	16	32593.6	5350.39	22621.8	135831	2649.57
F12	16	53750.6	9481.28	22598.7	133529	5787.43
G1	16	48559.1	8399.88	20638.1	134400	3740.13
G2	16	58558.7	10462.5	23684.4	140067	3505.02
G3	16	38062.3	6807.86	18649.8	105947	2814.39
G4	16	31887.3	5451.38	24367.2	135949	3053.07
G5	16	27460.5	4264.72	18835.3	101186	2529.05
G6	16	29666.9	5063.82	20787.6	106902	2294.55
G7	16	29177.8	5012.8	20633.7	107970	2584.48
G8	16	36613.8	6563.44	22710.4	117871	3667.12
G9	16	33480.6	5210.51	20045.5	111043	2635.03
G10	16	35941.9	6952.06	21100.1	116717	2684.08
G11	16	80133	13349.5	27164.6	144776	8547.21
G12	16	42234.7	6502.13	20664.3	135590	2738.77
H1	16	58078.5	9633.68	23554.2	152667	7785.5
H2	16	44287.8	7511.84	24158.6	153821	3744.13
H3	16	36897.5	6819.45	22376.8	131248	4944.56
H4	16	37853.2	7218.14	25890.2	145673	3252.79
H5	16	29685	5322.72	20834.8	117033	2474.16
H6	16	37739.6	6590.93	24937.4	134080	3902.59
H7	16	32671.3	9127.85	26291.7	134807	2614.63
H8	16	34979.6	6190.14	21827	121718	2669.83
H9	16	32377.5	5657.97	21630.1	124512	2537.46
H10	16	36137.4	8641.56	5627.89	7380.24	3858.4
H11	16	39513.5	6625.26	4130.76	6303.01	3416.47
H12	16	47225	6709.58	3887.38	5971.75	3695.13
A1	17	21464.3	4913.07	13189.8	92435.6	2632.33
A2	17	35372.9	5828.11	15685.8	100144	2745.8
A3	17	31928.8	7464.88	17939.6	103067	2338.1
A4	17	33828.1	5293.76	16750.9	94588	2934.07
A5	17	30289	4708.66	17703.5	98573.3	2637.35
A6	17	47127.1	8553.17	24770.4	127122	5053.29
A7	17	58675.3	5506.4	18886.7	100542	2623.62
A8	17	161983	25288.8	62342.7	324340	13372.9
A9	17	40037.3	6035.36	18101	102955	3180.41
A10	17	30063.4	5507.42	18798.6	113218	3190.65
A11	17	32046.2	4879.08	19326	128683	2666.85
A12	17	33559.1	5411.78	17315.6	126251	3008.68
B1	17	39116.9	7236.08	18188.8	122609	3413.87
B2	17	41642.8	7265.33	18272.3	111227	2995.94
B3	17	33353	6109.91	18783.2	107209	2632.51
B4	17	29735.7	4723.31	19208.5	106634	3090.67
B5	17	29225	4749.4	21738	122170	3195.42
B6	17	25083.8	3811.49	20367.5	109859	1945.66
B7	17	27745.4	4403.08	20090.9	107330	2163.19
B8	17	104811	15074.9	59121.4	323964	7156.27
B9	17	32256.5	5184.65	17973	98757.2	2208.62
B10	17	36849.7	6042.35	20083.8	116716	2413.92
B11	17	41746.2	6400.69	22509.7	137783	3944.42
B12	17	45900	8046.22	22362.8	145141	5557.74
C1	17	44052.1	7908.21	19916.3	126084	3990.19
C2	17	48701.3	7921.97	25793.4	156771	3829.33
C3	17	36864.4	5327.77	18780.8	107565	2026.09
C4	17	31604.8	5256.68	21450	115128	2985.56
C5	17	29799.7	4460.69	19798.2	101229	2956.99
C6	17	28457.8	4642.43	21577.8	109779	2560.11
C7	17	32472.2	5123.41	21083.7	106244	1634.2
C8	17	32791.2	4869.47	20227.5	103793	2297.36
C9	17	32212.6	6304.98	19277.1	97038	2373.61
C10	17	29712.3	5683.17	19932.7	110724	2298.27
C11	17	33256.4	6012.1	22411.5	136331	2291.67
C12	17	42787.4	6643.2	21768.3	139578	2981.38
D1	17	49387.4	8799.2	21558.9	132735	3340.27
D2	17	39322.1	6931.28	21287.2	125107	2845.13
D3	17	39554.2	7616.69	21541.6	112782	3252.71
D4	17	32358.6	5669.05	24087.3	125803	3800.33
D5	17	30346.3	4774.26	20779.9	104886	2271.8
D6	17	37150.4	6315.31	23876.8	114007	4065.98
D7	17	27529.9	4327.64	21107.8	103393	2218.47
D8	17	30582.3	6627.51	22625	111214	2181.71
D9	17	38376.5	7205.81	20631	102600	4019.21
D10	17	37525.4	6978.04	21749.8	112825	3166.95
D11	17	42206.5	8225.01	25721.3	143782	3170.42
D12	17	151793	19654.9	29871.9	153684	7301.73
E1	17	48765.8	8052.9	19973.1	124867	3809.46
E2	17	49240.8	8581.59	21578.5	120648	3882.79
E3	17	66481.5	8296.4	21580.8	113038	4183.57
E4	17	35409.9	6321.63	26299.3	136280	2981.46
E5	17	28152.3	4595.55	20587.8	103802	2487.99
E6	17	28909	5055.02	23861.7	117749	3514.74
E7	17	35629.8	6248.92	21876.1	104712	4337.74
E8	17	34317.6	6135.89	23323.8	114171	3714.04
E9	17	33831.8	7550.85	24084.9	106360	2629.42
E10	17	36707.8	6202.09	20747.3	111597	2818.61
E11	17	59213.8	11473	26614	137166	7160.12
E12	17	56634.8	9732.69	23041.4	134198	5597.6
F1	17	49010.8	9288.05	22623.6	140223	7452.36
F2	17	50377.4	8639.58	21809.1	125392	3391.79
F3	17	35846.8	6241.1	21139.8	119877	2604.74
F4	17	36338.3	6019.68	25285.9	134216	3235.96
F5	17	28242	4471.47	20713.8	108167	2209.69
F6	17	56561	10277	27892.3	128956	6459.27
F7	17	29406.1	4779.51	21914.5	110505	3229.37
F8	17	30659.3	4881.32	21653.8	112134	2394.93
F9	17	30638.5	5092.54	19996.8	107361	3084.97
F10	17	31952.7	5320.56	20422.1	113544	3607.94
F11	17	32251.2	5235.69	22443.7	135665	2480.43
F12	17	53729.5	9330.28	22604.5	133420	5737.78
G1	17	49003.5	8518.25	20420.2	134545	4387.11
G2	17	58240.3	9938.47	23728.6	140233	3389.06
G3	17	38308.6	6871.47	18551.6	105891	2716.97
G4	17	32167.6	5413.45	24383.2	136131	2841.53
G5	17	27168.3	4559.72	18766.1	100911	2533.79
G6	17	29416.5	5186.98	20873.4	107124	2440.47
G7	17	28964.8	4989.43	20538	107689	2542.9
G8	17	36871.1	6567.53	22580.6	117536	3640.84
G9	17	33778.1	5235.36	19951.7	111133	2411.64
G10	17	36298.3	6914.45	21140.4	116690	2326.02
G11	17	79567.6	13503.8	27088.4	144742	8105.91
G12	17	42353.7	6658.65	20602.8	135229	3188.2
H1	17	57808.6	9728	23522.6	152616	8109.44
H2	17	44212.6	7668.61	24066.2	152844	3897.45
H3	17	36782.1	6645.29	22335.8	131389	4750.79
H4	17	37567.9	7074.66	25823.2	145313	3092.02
H5	17	29659.7	5303.87	20836.3	116682	2538.72
H6	17	37832.5	6378.29	24990.6	133928	3714.45
H7	17	32668.3	9204.14	26300.3	134215	2524.14
H8	17	34773.3	6144.69	21754.1	121513	2777.74
H9	17	32211.2	5841.11	21488.7	123986	2601.34
H10	17	36262.4	8515.64	5769.56	7119.88	4261.77
H11	17	39216.7	6524.09	4289.46	5983.18	3409.7
H12	17	46732.5	6531.92	3708.15	5987.33	3857.5
A1	18	21285.8	4906.37	13249.5	91854.7	2476.63
A2	18	35077.4	5701.8	15394.7	99553.6	2531.28
A3	18	31770.8	7135.19	17857.5	102382	2440.62
A4	18	33810.1	5288	16734.9	94324	3010.09
A5	18	30374.7	4723.07	17619.6	98575.3	2859.34
A6	18	47165.7	8405.18	24535.1	126820	4771.85
A7	18	58816.7	5433.24	18672.2	100268	2868.32
A8	18	160901	24742.4	62074.6	324200	12888.6
A9	18	40305.6	6095.36	18127.5	102827	2721.55
A10	18	30265.3	5555.14	18658.6	112153	3248.12
A11	18	32465.6	4849.15	19227.7	128458	2570.44
A12	18	33777.9	5024.91	17417.1	125429	2897.77
B1	18	39665.5	6556.14	18587.4	122753	3528.91
B2	18	41193.4	6816.27	18487.5	110217	3321.73
B3	18	33110.7	6012.81	18668.4	107451	2421.3
B4	18	30058.7	4402.68	19081.2	106174	3111.16
B5	18	29403.3	4496.2	21686.2	122123	3147.15
B6	18	24837.1	4192.73	20539	110044	1914.83
B7	18	27642.1	4333.15	20029.3	107513	2389.54
B8	18	105447	14616.4	59031.4	324008	8707.87
B9	18	32551.5	5365.41	17946.8	98626.5	2638.74
B10	18	36684	5911	20240.7	116750	2186.84
B11	18	41587.5	6789.42	22450	137314	3823.18
B12	18	45310.9	8123.97	22430.5	144805	5840.27
C1	18	43732.8	8306.99	19873.7	125871	3541.6
C2	18	48886.6	8153.42	26138.7	157399	4043.68
C3	18	36981.5	5383.27	18591.6	107475	2230.84
C4	18	31530.8	5295.47	21679.3	115129	3243.63
C5	18	29855.6	4598.05	19865.4	101703	2450.45
C6	18	28382.4	4811.05	21613.6	109500	2318.18
C7	18	32615	4981.29	21128.8	106316	1922.79
C8	18	32588.2	4853.02	20207.6	103953	2477.12
C9	18	32288.2	6451.08	19368.4	96586.6	2712.05
C10	18	30199.7	5635.21	19943.7	110508	2461.37
C11	18	33713.8	6344.41	22346.1	135266	2373.4
C12	18	42892.7	6663.39	21680.7	138637	2992.05
D1	18	49975.7	8712.8	21587.9	133122	3226.78
D2	18	39697.8	7031.5	21390.2	125476	2935.95
D3	18	39804.2	7440.73	21430.6	112544	3561.34
D4	18	32434.6	5987.12	24121.2	125670	3755.92
D5	18	30508.1	4991.57	20937.2	104974	2175.93
D6	18	37405.8	6311.86	23775.3	113599	4214.28
D7	18	27564.5	4350.96	21008.3	103617	2742.34
D8	18	30598.1	6810.57	22773.2	111048	2526.68
D9	18	38549.3	7030.77	20591.1	102469	3935.04
D10	18	37540.3	6863.63	21628.1	112813	3442.71
D11	18	42295.4	8136.89	25672.8	143545	3142.28
D12	18	151561	19431.6	29840.7	153282	7435.88
E1	18	49206.6	7962.16	20098.5	124855	3880.78
E2	18	49367.7	8623.83	21555.3	120167	3954.75
E3	18	66369.2	8090.05	21422.2	113197	4257.91
E4	18	35447.4	6061.89	26288.3	136218	3163.63
E5	18	28311.9	4891.01	20682.7	103933	2652.53
E6	18	29100.3	5062.79	23734.3	117625	3506.49
E7	18	35864.2	6171.23	21812	105189	4166.39
E8	18	34335.1	6172.89	23502	114027	3646.86
E9	18	33731.3	7237.26	24056.8	106090	2671.49
E10	18	37491.3	6417.97	20520.7	111865	2985.71
E11	18	59255.8	11356.4	26456.1	136674	7245.19
E12	18	56573.6	9481.07	23013.8	133705	5163.19
F1	18	49377.3	9468.15	22696.9	140307	7280.11
F2	18	50620.8	8528.43	21662.7	125151	3589.02
F3	18	36064.3	6459.4	21206.3	120057	2907.47
F4	18	36094.1	5879.76	25270.6	133878	3284.66
F5	18	28110.7	4511.96	20701.4	108206	2028.23
F6	18	56416.9	10194.6	27819.1	128838	6621.88
F7	18	29288.1	4845.77	21942.7	110332	3545.14
F8	18	30580.7	4897.75	21727.3	112030	2379.26
F9	18	30529.3	5092.54	19834.6	107091	2946.29
F10	18	32071.8	5279.77	20236.2	113466	3683.06
F11	18	32396	5215.57	22592.1	135530	2554.05
F12	18	53664.5	9250.49	22406.3	132913	5276.87
G1	18	48864.6	8525.3	20604.4	133735	3972.11
G2	18	58582.5	10147.8	23588.3	140523	3440.47
G3	18	38135.1	7133.21	18531.3	105929	2678.01
G4	18	32454.1	5444.11	24372	136069	2952.61
G5	18	27357.2	4603.86	18852.5	100793	1931.1
G6	18	29807.4	5207.87	20723.8	106762	2765.82
G7	18	29281.8	5080.67	20577	107616	2533.49
G8	18	36685.2	6728.03	22610.6	117684	3472.11
G9	18	33447.6	5253.36	19963.8	110969	2352.95
G10	18	36583.6	6987.88	20860.9	116785	2409.36
G11	18	80336.9	13652.4	27061.2	144255	8251.92
G12	18	42785.7	6394.14	20573.2	135221	2818.62
H1	18	57947.4	9699.53	23425	151886	7694.05
H2	18	43973.6	7453.22	23957.4	153260	3865.17
H3	18	36713.1	6561.48	22297.8	131034	4936.27
H4	18	37631.1	7069.71	25786.5	145300	3017.32
H5	18	29522.2	5346.09	20796.3	116533	2559.74
H6	18	37619.7	6619.89	24875.8	133961	3747.34
H7	18	32967.1	9194.7	26160.3	134064	2557.48
H8	18	34596.8	6171.96	21790.2	121633	3094.31
H9	18	32439.1	5629.06	21498.2	123818	2679.21
H10	18	36483.9	8380.64	5712.89	7254.07	4242.84
H11	18	39472.4	6510.3	4239.11	6111.56	3478.51
H12	18	47038.2	6496.39	3743.45	6097.82	3347.78
A1	19	21024.7	4502.81	12848.7	91680.7	2404.56
A2	19	34996.4	6054.82	15263	99777.6	2766.56
A3	19	31933.7	7295.77	17817.9	102401	2353.1
A4	19	34011.1	5143.96	16770.3	94300.3	2820.04
A5	19	29885.3	4672.63	17646.5	98453.9	2909.43
A6	19	46920.2	8322.85	24528.6	126992	5109.79
A7	19	58628.2	5244.56	18698.7	99848.8	2609.45
A8	19	159688	24045.2	62062.9	322552	12836.5
A9	19	39851.9	5905.2	18156	102499	2921.31
A10	19	30000.4	5844.82	18649.7	111980	3298.96
A11	19	32268	4838.37	19238.1	128277	2884.05
A12	19	33721.4	5518.92	17340.6	125112	2960.33
B1	19	38605.7	7162.3	18205.1	122586	3222.71
B2	19	41188.5	7024.45	18435.1	110376	3048.07
B3	19	33621.2	5874.82	18831.2	106849	2404.78
B4	19	29928.8	4901.18	19236	106378	2813.52
B5	19	29255.8	4733.24	21826.3	121969	3364.36
B6	19	24790.9	3909.06	20575.6	109660	1928.43
B7	19	27569.7	4556.06	20096.3	107531	2112.59
B8	19	104108	14465.4	59160.8	323168	8234.45
B9	19	32462.4	5450.32	17936.5	98505	2475.72
B10	19	37178	5978.15	20143.4	116562	2520.54
B11	19	41569.6	6671.52	22221.3	136940	3699.63
B12	19	45486.1	8399	22347.6	144531	5819.18
C1	19	43378.4	7976.92	19812.6	125587	3876.92
C2	19	47852.1	8070.03	25756.2	156645	3962.02
C3	19	36432.3	5272.26	18583.5	107452	1959.72
C4	19	31559.4	5279.31	21599.6	114927	3533.01
C5	19	29586.6	4613.86	19921.1	100916	2624.98
C6	19	28480.2	4621.66	21652	109815	2693.17
C7	19	32412	5273.47	21051.1	106455	1872.49
C8	19	32530.2	4973.35	20195.8	103764	2535.55
C9	19	32248.3	6638.05	19150.4	96428.5	2399.71
C10	19	30234.3	5563.77	19984.7	110242	2179.93
C11	19	34157.7	6184.82	22333.1	135589	2084.04
C12	19	42937.6	6674.08	21562.1	138371	3178.16
D1	19	49191	8685.4	21478	132472	3260.44
D2	19	39848.6	6960.08	21371.2	125012	2860.45
D3	19	39797.1	7486.04	21428.5	112687	3426.51
D4	19	32719.4	5451.2	24298.2	125794	3795.04
D5	19	30368.3	5322.27	20923.2	104460	2277.79
D6	19	36976.7	6395.66	23726.9	113471	4284.34
D7	19	27483.4	4588.41	21045.7	103401	2468.1
D8	19	30189.4	6716.83	22662.3	111424	2370.97
D9	19	38128	6921.15	20579	102451	3658.61
D10	19	38196.7	6933.02	21764.2	112498	3274.35
D11	19	42969.5	8429.27	25706.9	143122	3260.08
D12	19	151367	19451.1	29870.9	153394	7295.77
E1	19	49042	8094.25	19986.2	124909	4040.21
E2	19	49447.1	8722.41	21405.6	119989	3405.13
E3	19	66198.8	8142.1	21476.3	112691	4409.41
E4	19	35628.5	6090.36	26018.7	136116	3045.31
E5	19	28324.9	4745.94	20605.3	104013	2823.69
E6	19	29090.1	5258.81	23833.5	117571	3698.09
E7	19	35726.3	6217.67	21838.4	104804	4452.29
E8	19	34286.8	6229.74	23242.7	114152	3871.43
E9	19	33846.8	7401.1	24084.9	106105	2477
E10	19	38767.6	6290.04	20666.1	111763	2996.72
E11	19	59173.7	11247.5	26524	136597	7137.18
E12	19	57182.1	9512	22876.3	133634	5495.63
F1	19	49485.6	9598.22	22662.9	139944	7410.25
F2	19	50560.2	8650.07	21627.3	125113	3437.77
F3	19	36096.5	6507.71	21010.5	119912	2792.14
F4	19	35993.4	6018.84	25235.7	133910	3135.08
F5	19	28143.1	4546.78	20727.1	108324	1993.47
F6	19	56087.9	10340.5	27736.5	128729	6849.87
F7	19	29231.3	4869.15	21863.7	109955	3243.39
F8	19	30732	4943.9	21845.2	112486	2392.45
F9	19	30871.3	4950.12	19898.3	107183	3281.5
F10	19	32267.1	5370.71	20201.9	113077	3704.9
F11	19	33006.3	5151.18	22665.4	135342	2615.74
F12	19	54395.5	9338	22337.5	132593	5579.73
G1	19	48487.4	8336.47	20472.1	134062	4135.79
G2	19	58562.3	10069.8	23748.5	140379	3290.6
G3	19	38244.8	6836.03	18523.4	106163	2684.21
G4	19	32389.1	5395.7	24451.4	135830	2901.97
G5	19	27557.1	4555.08	18748.2	100892	2468.31
G6	19	29716.2	5196.34	20762.7	106533	2299.02
G7	19	29154.4	5086.7	20508.8	107345	2521.73
G8	19	36570.8	6604.38	22491.6	117273	3419.54
G9	19	33799.3	5302.21	19956.9	110858	2409.89
G10	19	37037.5	6971.76	20986.4	116832	2632.8
G11	19	80678.6	13643.4	27013.2	144277	8307.49
G12	19	43407.6	6682.91	20704.2	134542	3146
H1	19	57812.5	9784.96	23582.5	152104	7466.21
H2	19	44101.2	7318.12	24008.8	152654	3964.31
H3	19	36446.8	6464.6	22304	131254	4826.43
H4	19	37411.5	7218.14	25784.1	145063	3155.35
H5	19	29536.3	5377.75	20822.2	116331	2453.14
H6	19	37563.5	6609.98	24947.1	133725	3751.93
H7	19	32737.9	9112.91	26190.6	134141	2658.29
H8	19	34614.4	6295.72	21644.4	121632	2608.37
H9	19	32329	5588.75	21353.3	123485	2755.33
H10	19	36453.4	8569.03	5691.4	7314.15	4196.03
H11	19	39461.6	6567.78	4147.17	5993.32	3646.57
H12	19	46940.7	6370.55	3888.74	5495.83	3164.22
A1	20	21032.2	4333.68	12927.3	92081.5	2547.27
A2	20	35740	5847.54	15319.7	99809.4	2864.82
A3	20	31594.8	7295.77	17830.2	102462	2048.02
A4	20	33988.1	5342.16	16655.1	94153.6	2366.05
A5	20	29914.6	4672.63	17673.5	98235.7	3061.68
A6	20	46911.4	8381.21	24466.3	126450	4918.33
A7	20	57817.4	5424.57	18700.6	100260	2626.46
A8	20	159816	24449.3	61748.2	321661	13238
A9	20	40185.8	6049.6	18168.2	102580	3075.58
A10	20	30671.9	5717.59	18629.5	112190	3034.82
A11	20	32544.3	5306.52	19287.8	128003	2835.27
A12	20	34374.4	5163.29	17194.6	124547	3236.18
B1	20	39185	7172.27	18316.2	122681	3138.12
B2	20	41424.6	6783.56	18367.2	110221	2947.73
B3	20	33483	6346.29	18848.9	107153	2272.62
B4	20	29551.9	4680.26	19254.4	106461	2767.15
B5	20	29742.3	4387.38	21758	122155	3275.07
B6	20	24719.8	3667.84	20412.5	109841	1985.55
B7	20	27941.8	4243.99	19978.6	107666	2192.48
B8	20	104864	14559.8	59129.9	322242	8216.12
B9	20	32262.3	5257.68	17937.4	98467.7	2363.35
B10	20	36804.8	6116.42	20261.6	116763	2426.75
B11	20	42219.6	6573.46	22500.6	137141	3960.59
B12	20	45164.8	7830.23	22152.8	144080	5771.39
C1	20	43497.4	7774.46	19925.5	125902	3649.26
C2	20	47845.2	7867.51	25668.2	156629	4144.05
C3	20	36917.7	5027.09	18728.6	107212	2325.33
C4	20	31882	5048.7	21766.8	114893	3558.92
C5	20	29708.1	4633.63	19868.4	101373	2983.07
C6	20	28471.4	4545.25	21753.4	109776	2584.3
C7	20	32426.7	5138.5	21077.9	106550	1564.94
C8	20	32903.8	4904.97	20271.1	103728	2523.86
C9	20	32314.5	6611.09	19109.7	96209.2	2332.2
C10	20	31288.1	5932.73	19908.8	110372	2356.95
C11	20	34549.3	6155.3	22328.7	135153	2565.57
C12	20	43826	6657.45	21399.6	138499	3379.69
D1	20	49703.1	8764.43	21550.9	132963	2919.01
D2	20	39672.3	6960.08	21353.3	125177	2726.95
D3	20	39550.2	7634.6	21395.7	112569	3748.84
D4	20	32586.6	5652.68	24190.1	126001	3621.63
D5	20	30188.1	5219.28	20846.6	105085	2107.03
D6	20	37097.6	6406.89	23774.4	113692	4270.69
D7	20	27457.7	4655.75	21015.6	103228	2260.38
D8	20	30383.8	6552.33	22755.5	111746	2377.5
D9	20	38355	7109.45	20410.2	102131	3678.7
D10	20	38836.5	7123.39	21781.4	113109	3392.4
D11	20	44603.5	8473.85	25580.1	143182	3248.62
D12	20	151808	19481.3	29779.2	153074	7075.17
E1	20	48753.8	8024.19	20163.9	124855	4016.08
E2	20	49404.7	8425.6	21178.9	120152	3901.56
E3	20	65669.1	8154.19	21412	112857	4332.25
E4	20	35408.2	6243.35	26298.3	136104	3019.02
E5	20	28150.6	4702.59	20548.1	103681	2494.61
E6	20	29246.9	5107.7	23868	117546	3975.86
E7	20	35801.8	5991.75	21936.4	105188	4145.56
E8	20	34533	6122.35	23168.3	113869	3713.08
E9	20	34141.9	7266.33	24012.4	105886	2435.86
E10	20	40776.6	6771.57	20722.1	111948	3282.26
E11	20	59776.3	11466.2	26524	136440	6886.75
E12	20	57690.6	9726.83	22846.2	133562	5450.87
F1	20	49393.6	9153.69	22553	140194	7756.01
F2	20	50611.4	8377.42	21617.2	124846	3537.92
F3	20	35921.6	6430.77	21100	120414	2407.42
F4	20	35878.5	6067.43	25209.2	134438	3373.37
F5	20	28269.2	4357.3	20739.6	108421	2219.01
F6	20	56387.1	10107	27787.9	129076	6558.11
F7	20	29242.8	4766.26	21874.1	110044	3357.16
F8	20	30823.1	4874.28	21785.4	112283	2293.49
F9	20	30501.5	5243.01	19927.3	107295	3264.48
F10	20	33076.2	5561.94	20315.8	112925	3594.83
F11	20	33879.2	5517.4	22449.6	134964	2747.08
F12	20	55148.6	9468.41	22373.5	132135	5525.12
G1	20	49325.2	8529.52	20512.3	134033	3897.36
G2	20	58582.5	10115.9	23667.8	140316	3408.75
G3	20	38154.9	6916.92	18551.6	106548	2782.5
G4	20	32198.9	5321.47	24363.2	135711	2702.68
G5	20	27445.7	4518.69	18856.4	101009	2664.74
G6	20	29856.7	5166.82	20696	106666	2431.54
G7	20	29082.2	5100.27	20590.1	107488	2645.66
G8	20	36584.7	6618.3	22563.1	117417	3534.85
G9	20	33473	5303.07	19970.7	111192	2402.88
G10	20	38359.7	7037.14	20951.4	116581	2307.71
G11	20	82002.9	13839.4	26874.9	143990	8018.73
G12	20	45306.8	6877.04	20655.2	135068	3166.53
H1	20	57960.9	9946.91	23113	151585	7585.55
H2	20	43671.6	7471.06	24116.5	152616	4000.04
H3	20	36930.9	6747.61	22356.3	131203	4859.59
H4	20	37443.9	7289.89	25748.9	144991	2994.58
H5	20	29293.9	5153.08	20764.5	116459	2377.33
H6	20	37648.9	6465.94	24990.6	133579	3663.21
H7	20	32560.5	9108.98	26146.3	133604	2484.45
H8	20	34641.4	6162.87	21719.4	121237	2605.51
H9	20	32148	5579.99	21316.2	123276	2488.46
H10	20	36081.6	8771.52	5756.86	7358.21	3959.99
H11	20	39517.1	6516.05	4174.54	6000.07	3186.37
H12	20	47454.7	6565.97	3949.84	6286.21	3648.53
A1	21	21075.4	4733.9	12993.3	91921.5	2933.62
A2	21	35316.4	5466.99	15506.6	99533.9	3107.01
A3	21	32060.7	7426.51	17936.9	102298	2605.67
A4	21	33767.9	5239.6	16676.7	94100.5	2953.07
A5	21	30152.6	4838.37	17591.6	98319	2699.23
A6	21	46992.9	8469.8	24515.7	126514	4853.46
A7	21	58464.3	5251.29	18514.6	100063	2764.39
A8	21	159638	24463.5	61480.1	320994	12710.8
A9	21	39604.3	6104.51	18067.4	102393	2601.89
A10	21	30998.4	5349.52	18616.1	112060	3133.19
A11	21	33842.6	5249.05	19301.7	128148	2880.57
A12	21	34985.5	5249.59	17385.1	124464	2920.52
B1	21	38980.9	6697.71	18334.4	122291	3356.35
B2	21	40988.4	7110.69	18304.9	110655	2697.52
B3	21	33014.9	6074.14	18793.3	106941	2677.35
B4	21	29707.6	4597.55	19302.5	105993	2618.33
B5	21	29433	4559.77	21495.5	121566	3196.63
B6	21	25205.7	3760.9	20328.1	110139	2012.75
B7	21	27758	4355.01	20067.3	107575	2074.42
B8	21	105326	14969.7	58626	321549	7812.95
B9	21	32323.6	5174.61	17744.8	98707.7	2661.76
B10	21	37127.8	5986.06	20073.9	117006	2325.06
B11	21	42515.1	6818.61	22360.4	136973	3438.67
B12	21	45986	8053.42	22415.3	144016	6004.72
C1	21	43586.3	7741.33	19705.5	125972	3663.84
C2	21	46515.7	7772.21	25539.6	156442	4055.59
C3	21	36947.9	5394.84	18692.6	107412	2440.08
C4	21	32035.3	5110.12	21654.9	115274	3238.23
C5	21	29567.3	4551.61	19903.6	101330	2739.33
C6	21	28818.6	4629.97	21597.9	109501	2668.12
C7	21	32467.6	5211.54	21022.7	106428	1550.93
C8	21	32800.6	4876.4	20280.2	103474	2265
C9	21	31987.6	6414.55	19253.5	96229.3	2514.02
C10	21	31964.3	5738.95	19726.9	110161	2446.45
C11	21	35953.3	6573.96	22299.3	135096	2393.28
C12	21	44249.7	7014.97	21408.8	138197	2868.76
D1	21	49927.1	9024.68	21555.9	132521	3091.17
D2	21	39726.8	6774.62	21377.9	125340	3225.94
D3	21	39778.8	7444.95	21402	112539	4023.76
D4	21	32186.4	5849.05	24247.3	126158	3798.22
D5	21	30363	5162.59	20930.2	105022	2181.92
D6	21	37202.5	6115.75	23660.1	113588	3881.29
D7	21	27591.8	4517.6	20891.4	103318	2380.64
D8	21	30485.1	6847.72	22883.1	111916	2578.89
D9	21	37887	7338.42	20524.3	102187	3670.09
D10	21	40261.6	7355.96	21906	112771	3746.54
D11	21	45841.8	8718.54	25578	143486	3028.64
D12	21	152696	19632.5	29665.7	152774	7078.15
E1	21	49062.5	7932.3	20222.8	125087	3959.45
E2	21	49273.6	8631.42	21375	120081	4088.25
E3	21	65665.6	8055.66	21419.4	112808	4200.51
E4	21	35518.4	6103.7	26117.7	136265	3199.31
E5	21	28326.5	4768.05	20503.9	103792	2479.48
E6	21	29353.5	5075.75	23951.7	117554	3594.5
E7	21	35619.2	6367.68	21747	104817	4230.77
E8	21	34416.6	6189.13	23262.5	113885	3646.86
E9	21	33629	7525.31	23857.3	105867	2493.83
E10	21	44411.4	6898.61	20565	111892	3088.54
E11	21	61042.1	11518.3	26267.6	136438	7051.16
E12	21	59073.9	9662.47	22824.2	133550	5416.05
F1	21	49136.9	9360.94	22558.2	140480	7151.25
F2	21	50846.5	8446.63	21757.6	125118	3342.73
F3	21	36982.1	6182.95	21007	120385	2703.85
F4	21	36221.8	5821.96	25301.3	134572	3533.38
F5	21	28655.6	4458.52	20514.2	108667	2229.19
F6	21	56085.8	10214.3	27774.7	129389	6442.53
F7	21	29118.4	4743.66	21798.4	109891	3374.47
F8	21	30530	5037.77	21770.9	112227	2233.29
F9	21	30865.3	5125.53	19859.4	107701	2990.53
F10	21	34411.8	5586.59	20344.1	113200	3842.93
F11	21	35466.8	5685.42	22371.5	135237	2785.88
F12	21	56402.8	9562.79	22294.1	132143	5726.2
G1	21	49025.5	8681.71	20599.2	134369	4131.92
[truncated: 10,295 more rows]

## Sheet: Multicomponent Data
Block Type	96alum
Chemistry	SYBR_GREEN
Experiment File Name	D:\ShuJu\LZM\spx9-12 iaa=lp.eds
Experiment Run End Time	2023-08-17 06:04:16 AM CST
Instrument Type	sds7500
Passive Reference	ROX
Well	Cycle	SYBR	ROX
A1	1	22682.3	97894.4
A2	1	37126.4	103438
A3	1	33095.7	107924
A4	1	36031.9	99693.9
A5	1	31278.6	103720
A6	1	48275.8	133012
A7	1	50051.4	107709
A8	1	176156	351406
A9	1	42481.7	110160
A10	1	30827.8	120993
A11	1	32841.9	135013
A12	1	34107.1	132585
B1	1	40545.6	129323
B2	1	44290.8	115496
B3	1	33922.8	110786
B4	1	30023.3	110975
B5	1	29680.1	127551
B6	1	24663.7	113522
B7	1	28115.5	110220
B8	1	109663	348278
B9	1	34627.4	104227
B10	1	39830.4	123092
B11	1	44109.9	144826
B12	1	47281.5	153248
C1	1	45357.6	129415
C2	1	48723.9	161792
C3	1	38052.8	111650
C4	1	31804.4	118296
C5	1	30049.7	105292
C6	1	28367.3	113573
C7	1	33705.9	108997
C8	1	33383.2	107793
C9	1	34549.8	102906
C10	1	31547	117175
C11	1	34126.4	143882
C12	1	44162	147281
D1	1	51290.7	137818
D2	1	40646.2	128365
D3	1	40733.1	117365
D4	1	32790.2	127175
D5	1	29200.8	107513
D6	1	38232.2	117996
D7	1	27713.9	107932
D8	1	29425.4	114013
D9	1	42710.5	109002
D10	1	39897.3	117982
D11	1	44392.9	151506
D12	1	169447	162767
E1	1	49916.2	128132
E2	1	53080.1	124875
E3	1	72631.4	117695
E4	1	35326.6	141027
E5	1	27420.9	108416
E6	1	29456.8	121243
E7	1	37721.3	109493
E8	1	35366.5	118695
E9	1	34994	112289
E10	1	37405.6	115740
E11	1	67390	144866
E12	1	60934.7	141413
F1	1	50852.2	144440
F2	1	53697.2	130336
F3	1	36765.5	121132
F4	1	35571.7	137636
F5	1	27968.3	109644
F6	1	56987.4	131567
F7	1	28956.7	116555
F8	1	30878	116085
F9	1	31223.6	111236
F10	1	32648.2	121200
F11	1	32590	141074
F12	1	55178.1	141809
G1	1	49092.5	138502
G2	1	61360.1	144451
G3	1	40699	106577
G4	1	32028.6	139685
G5	1	27316.2	105508
G6	1	29671	113143
G7	1	29224.5	114006
G8	1	37530.3	123682
G9	1	35511.9	115071
G10	1	37724	121957
G11	1	85433.1	150990
G12	1	42098.3	141348
H1	1	59326.6	161546
H2	1	45398.8	157838
H3	1	37682.4	135060
H4	1	38380.6	152235
H5	1	30675.7	120373
H6	1	39062.1	138960
H7	1	33278.8	140844
H8	1	35638.9	126724
H9	1	33555.8	132952
H10	1
H11	1
H12	1
A1	2	22098.8	96791
A2	2	36370.8	102978
A3	2	32776.1	107059
A4	2	35864.4	99772.5
A5	2	31229.5	104062
A6	2	49018.2	132779
A7	2	49379.8	107111
A8	2	176564	349079
A9	2	42992.8	109519
A10	2	30866.3	120715
A11	2	33354.5	135121
A12	2	34122	133079
B1	2	40381.7	127972
B2	2	43381	113659
B3	2	34376.6	109603
B4	2	30285.9	109806
B5	2	29918.3	126861
B6	2	25013.1	112498
B7	2	28508.2	109577
B8	2	108897	343602
B9	2	34265.4	103162
B10	2	39518	121835
B11	2	43669.7	143160
B12	2	47206.9	152745
C1	2	45710.5	129373
C2	2	49809.1	160605
C3	2	38231.1	110320
C4	2	31753.1	117372
C5	2	29941.9	104670
C6	2	28605.2	112833
C7	2	33647.9	108323
C8	2	33318.6	107102
C9	2	33940.3	101737
C10	2	31390.7	115589
C11	2	33635.9	142197
C12	2	44597.1	147567
D1	2	51267.5	137211
D2	2	40555.3	127181
D3	2	40363.5	116545
D4	2	32696.1	126014
D5	2	29602.1	107273
D6	2	38278.5	117224
D7	2	27831.2	107165
D8	2	29601.4	113210
D9	2	41892.7	108048
D10	2	39429.2	116930
D11	2	43918.3	149033
D12	2	164631	161890
E1	2	50398.3	127615
E2	2	52060.7	123952
E3	2	71686.9	116913
E4	2	35715.4	138701
E5	2	27632.4	107910
E6	2	29414.6	120192
E7	2	38670.8	106824
E8	2	35437.6	117592
E9	2	35042.7	111206
E10	2	37032.8	114783
E11	2	65371.8	143360
E12	2	60329.4	141272
F1	2	51399.4	143706
F2	2	52765.4	128557
F3	2	36559.9	120269
F4	2	36042.5	136183
F5	2	28073	108556
F6	2	57631.7	131327
F7	2	29163	115746
F8	2	31101.3	115315
F9	2	31396.5	110101
F10	2	32364	120004
F11	2	32377.9	140201
F12	2	55804.4	142674
G1	2	49743.8	138123
G2	2	60462.8	143042
G3	2	40255.4	105505
G4	2	32046.1	138755
G5	2	27235.8	104260
G6	2	29947	111970
G7	2	29256.5	112678
G8	2	37091.4	122765
G9	2	35422.3	114188
G10	2	37802	120095
G11	2	84144.3	149744
G12	2	42955.3	141658
H1	2	59672.1	160746
H2	2	45120.4	157170
H3	2	37628.2	134485
H4	2	38563.2	152019
H5	2	30772.3	120539
H6	2	38966.1	138926
H7	2	33722.5	141790
H8	2	36060.5	127035
H9	2	33750.3	133353
H10	2
H11	2
H12	2
A1	3	22415	97523
A2	3	37035.8	103449
A3	3	33198.5	106605
A4	3	35875.6	99190.4
A5	3	31190	103226
A6	3	49180.4	131943
A7	3	48998.5	106153
A8	3	174253	347315
A9	3	42525.6	108317
A10	3	30722.9	120264
A11	3	32993.9	134406
A12	3	34268.4	132888
B1	3	40582.7	127327
B2	3	43294.9	113255
B3	3	33745.8	109485
B4	3	29496.4	109278
B5	3	29582.5	126284
B6	3	25045	112109
B7	3	28172.4	109012
B8	3	108443	341505
B9	3	34126.5	102948
B10	3	39423.5	121560
B11	3	43417.9	141393
B12	3	47351.8	152547
C1	3	45914.5	129181
C2	3	49539.8	160544
C3	3	37671.6	110092
C4	3	31848.6	116829
C5	3	30228.8	103995
C6	3	28651.4	112404
C7	3	34066	107827
C8	3	33286.1	106465
C9	3	33573.1	101018
C10	3	31131.9	115118
C11	3	33599	140966
C12	3	44466	146522
D1	3	51833.5	136948
D2	3	40565.6	127227
D3	3	40281.5	116164
D4	3	32663.9	125793
D5	3	29605.5	106461
D6	3	38278.8	116957
D7	3	28095.7	106512
D8	3	29667	112768
D9	3	41236.5	107190
D10	3	39202.2	116043
D11	3	43420.4	148016
D12	3	163699	161509
E1	3	50608.7	127897
E2	3	51762.7	123737
E3	3	71082.7	116551
E4	3	35591.1	138734
E5	3	27772.9	107073
E6	3	29251	119871
E7	3	37975.9	107424
E8	3	35092.2	117005
E9	3	34723.8	110457
E10	3	36665.4	114548
E11	3	64322.4	142522
E12	3	60234.7	140667
F1	3	51363.6	143532
F2	3	52422.2	128392
F3	3	36591.5	119824
F4	3	36346.9	135672
F5	3	28381.5	108797
F6	3	57856.6	130903
F7	3	29286.7	115100
F8	3	31061.3	114944
F9	3	30763.9	109664
F10	3	32183.4	119257
F11	3	32328.6	139716
F12	3	55681.5	141964
G1	3	49763.4	137900
G2	3	60044.8	142456
G3	3	40190.7	105874
G4	3	32042.1	138277
G5	3	27412.4	103818
G6	3	29889.9	110905
G7	3	29322.4	112192
G8	3	37134.1	122415
G9	3	35224.9	113762
G10	3	37625.1	119626
G11	3	84040.9	149002
G12	3	42856.5	141627
H1	3	59561.3	160829
H2	3	45549.2	157234
H3	3	37467.8	134478
H4	3	38597.3	151124
H5	3	30477.3	120216
H6	3	38780.1	138924
H7	3	33937.5	141466
H8	3	36366.1	126372
H9	3	33512.1	132521
H10	3
H11	3
H12	3
A1	4	22477.4	96676.7
A2	4	36678.1	102265
A3	4	33163.7	105746
A4	4	35404.9	98335.3
A5	4	30792.6	103029
A6	4	48886.8	131308
A7	4	48935.7	104942
A8	4	173479	342529
A9	4	42287.3	107066
A10	4	30748.8	118886
A11	4	32623.7	133747
A12	4	33842.6	132333
B1	4	40868.9	126599
B2	4	43446.1	113720
B3	4	33606.2	109086
B4	4	30015.5	109022
B5	4	29867.6	125704
B6	4	24879.2	111656
B7	4	28281.2	108827
B8	4	107697	338845
B9	4	34346.5	102286
B10	4	38998.6	121004
B11	4	43574.5	141795
B12	4	47031.5	151786
C1	4	45754.6	128618
C2	4	48761.4	160771
C3	4	37434.5	108993
C4	4	31840.2	116506
C5	4	29955.5	103628
C6	4	28537.7	111862
C7	4	34006.2	107505
C8	4	33210.5	105992
C9	4	33544.5	100870
C10	4	30892.2	114180
C11	4	33617	140517
C12	4	44523.1	146177
D1	4	51546.6	135908
D2	4	40266.4	126862
D3	4	40543.8	115935
D4	4	32573.3	125332
D5	4	29846.2	106548
D6	4	38243.4	116462
D7	4	28002.4	106341
D8	4	29879.3	112212
D9	4	41113.4	106637
D10	4	38924.6	115775
D11	4	43240.9	147904
D12	4	162599	160759
E1	4	49988.3	127158
E2	4	51094.2	123379
E3	4	69950.6	116129
E4	4	35783	138320
E5	4	27892	106616
E6	4	29266.7	119719
E7	4	37718.5	107078
E8	4	35095.2	116330
E9	4	34485.6	110008
E10	4	36741.7	113871
E11	4	63915.2	141666
E12	4	60029.5	140201
F1	4	51287.3	142797
F2	4	51924.8	127711
F3	4	36614.1	120254
F4	4	36447.5	135343
F5	4	28198	108483
F6	4	58155.2	130797
F7	4	29345.4	114498
F8	4	30965.9	114444
F9	4	30987.7	108958
F10	4	32389.1	118934
F11	4	32399.2	139817
F12	4	55447.5	140750
G1	4	49388.4	137539
G2	4	59800.3	142253
G3	4	39900.1	105680
G4	4	32067.1	138313
G5	4	27382.6	103499
G6	4	29841.1	110285
G7	4	29083.9	111513
G8	4	37207	121688
G9	4	35073.1	113326
G10	4	37365.4	119174
G11	4	82603.2	148582
G12	4	42681.2	140869
H1	4	59861.2	160203
H2	4	45399.7	156700
H3	4	37680.4	134402
H4	4	38614.3	150170
H5	4	30667.8	119825
H6	4	38982.3	138104
H7	4	33619.8	140583
H8	4	36120.8	126017
H9	4	33802.2	131380
H10	4
H11	4
H12	4
A1	5	22321.8	96924.4
A2	5	36816.2	102277
A3	5	32817.1	105710
A4	5	35403.7	98041.5
A5	5	30703.9	102433
A6	5	48393.6	131198
A7	5	48695.8	104475
A8	5	172768	341670
A9	5	41519.5	106753
A10	5	30904.1	117658
A11	5	32339	133385
A12	5	34249.5	131790
B1	5	40199.4	125917
B2	5	43100.1	113189
B3	5	33478.8	109171
B4	5	30164.3	108970
B5	5	29698.8	125455
B6	5	24590.7	111656
B7	5	28234.7	108784
B8	5	107659	338869
B9	5	34074.9	101985
B10	5	38735.2	120624
B11	5	43247.9	141417
B12	5	46656.9	151110
C1	5	45961.1	128084
C2	5	48696.6	159631
C3	5	37576.7	109337
C4	5	31721.5	116563
C5	5	29977	103442
C6	5	28658.5	111913
C7	5	33710	107180
C8	5	33150.6	105532
C9	5	33486.4	100594
C10	5	30914.1	114000
C11	5	33876	140047
C12	5	44278.3	145416
D1	5	50797.4	136000
D2	5	40206.7	126725
D3	5	40620.4	115900
D4	5	32569.7	125307
D5	5	29744.7	106402
D6	5	38027.2	116415
D7	5	28207.5	106132
D8	5	30041.1	112248
D9	5	40546.3	106119
D10	5	39028.7	115602
D11	5	43125.7	147968
D12	5	161583	159689
E1	5	50170.3	126580
E2	5	50989.2	122890
E3	5	70090.9	116311
E4	5	35848.8	138313
E5	5	28019.8	106345
E6	5	29281	119523
E7	5	37527.9	106688
E8	5	34817.2	116266
E9	5	34337.8	109920
E10	5	36669.9	113615
E11	5	63315.4	141438
E12	5	59701.4	139464
F1	5	50894.1	142599
F2	5	51835.8	127925
F3	5	36375.1	119949
F4	5	36458.3	135226
F5	5	28169.7	108614
F6	5	58520	130427
F7	5	29213.7	113694
F8	5	31088.3	114351
F9	5	30902.3	108966
F10	5	31975.8	118485
F11	5	32197.8	139602
F12	5	55500.1	139684
G1	5	49053.3	137280
G2	5	59320.1	141958
G3	5	39497.4	105763
G4	5	32016.7	137841
G5	5	27284.8	103274
G6	5	29834.6	110118
G7	5	29203.2	111346
G8	5	36636.9	121269
G9	5	34923.1	112968
G10	5	36982.1	119286
G11	5	81703.9	148425
G12	5	42654.7	140107
H1	5	58973.9	159571
H2	5	45433.4	156509
H3	5	37543.2	133877
H4	5	38204.8	150117
H5	5	30473.6	119360
H6	5	38855.8	137748
H7	5	34035.7	139656
H8	5	36188.1	125379
H9	5	33486.8	130483
H10	5
H11	5
H12	5
A1	6	22403.1	96340.8
A2	6	36254.8	102251
A3	6	32287.1	105403
A4	6	35079.4	97817
A5	6	30643.3	101688
A6	6	48290.7	130498
A7	6	48095.3	103960
A8	6	171487	339301
A9	6	41696.2	106434
A10	6	30337	116930
A11	6	32640.8	132352
A12	6	33392.7	131021
B1	6	40276.9	126287
B2	6	42897.6	113037
B3	6	33280.3	109124
B4	6	29982.6	108838
B5	6	29806.2	125415
B6	6	24955.9	111286
B7	6	28109.1	108372
B8	6	107208	336650
B9	6	33643.9	101704
B10	6	38420.7	120365
B11	6	43214.6	141021
B12	6	46687.5	150510
C1	6	45020.3	128100
C2	6	49501	159957
C3	6	37233.5	109433
C4	6	31879.5	116334
C5	6	29558.1	103452
C6	6	28614.6	112125
C7	6	33558.9	106954
C8	6	32893.3	105388
C9	6	33209.8	100099
C10	6	30616.2	113536
C11	6	33652.7	139879
C12	6	44127.2	144392
D1	6	51273.6	136036
D2	6	40169.7	126854
D3	6	40350.5	115288
D4	6	32133.1	125739
D5	6	29412.6	106245
D6	6	37838.7	115977
D7	6	28220.5	105678
D8	6	29764.9	111750
D9	6	40326.7	105979
D10	6	38791.4	115371
D11	6	43063	147190
D12	6	160453	159391
E1	6	49898.3	126261
E2	6	50864.2	123056
E3	6	69436.5	115903
E4	6	35707.6	138037
E5	6	28108.5	106144
E6	6	29385.9	119340
E7	6	37313.3	106781
E8	6	34704.3	115947
E9	6	34171.6	109383
E10	6	37043.4	113383
E11	6	62924.4	140823
E12	6	59371.7	139141
F1	6	50893.5	142174
F2	6	51159.2	127535
F3	6	36352.3	119967
F4	6	36752.5	135245
F5	6	28231.6	108672
F6	6	58726.9	130767
F7	6	29350.3	113844
F8	6	31032.6	113999
F9	6	30926.8	108554
F10	6	31878.2	117897
F11	6	32390.7	139131
F12	6	54997.2	138740
G1	6	49129	137165
G2	6	59275	141830
G3	6	39374.2	105560
G4	6	32177.5	137844
G5	6	27412.2	102945
G6	6	29858.4	109931
G7	6	29426.7	110989
G8	6	36833.6	120949
G9	6	34944.1	112781
G10	6	36928.9	118805
G11	6	81537.4	148557
G12	6	43221.1	139554
H1	6	58798.6	158352
H2	6	45318.4	156197
H3	6	37212.6	133436
H4	6	38357.2	149236
H5	6	30309.7	119275
H6	6	38553.3	137293
H7	6	33901.4	139135
H8	6	35881	124645
H9	6	33739.2	130064
H10	6
H11	6
H12	6
A1	7	22678.5	95607.8
A2	7	36137.2	101758
A3	7	32702.2	104900
A4	7	35251.8	97816.3
A5	7	30303	101637
A6	7	48279.7	129989
A7	7	47507.8	103657
A8	7	170512	337993
A9	7	41544.2	106281
A10	7	30414.3	117547
A11	7	32639.6	132387
A12	7	33625.3	130650
B1	7	40374.1	125959
B2	7	42565.5	113300
B3	7	33720.1	108928
B4	7	29847.1	108572
B5	7	29450.6	124871
B6	7	24671.4	111357
B7	7	27735.4	108280
B8	7	107225	335972
B9	7	33530.7	101668
B10	7	37966.1	119596
B11	7	43172.2	140761
B12	7	46938.4	149428
C1	7	44801.8	127605
C2	7	48925.7	159906
C3	7	37399.3	109204
C4	7	31760.5	116636
C5	7	29932	103260
C6	7	28608.3	111371
C7	7	33656	107015
C8	7	32796	105030
C9	7	33217.2	99871.6
C10	7	30633	113379
C11	7	33488.4	139431
C12	7	43615.8	143969
D1	7	51360.7	135535
D2	7	40145	126633
D3	7	40355.4	115113
D4	7	32523.6	125041
D5	7	29859.1	106069
D6	7	37881.6	115782
D7	7	28143.4	105707
D8	7	30067.2	111472
D9	7	39877.4	106019
D10	7	38743.2	115143
D11	7	42997.6	146914
D12	7	158690	158816
E1	7	49593.3	126023
E2	7	50625	122584
E3	7	69029.3	115448
E4	7	35717.9	137925
E5	7	27965.5	106259
E6	7	29161.1	119285
E7	7	37072.3	106495
E8	7	34979.2	115766
E9	7	34548.7	109236
E10	7	36801.2	113169
E11	7	62068.6	140727
E12	7	59135.6	138631
F1	7	50475.1	141881
F2	7	50689	127345
F3	7	36191.6	119880
F4	7	36491.9	135099
F5	7	28333.8	108456
F6	7	58686.3	130563
F7	7	29309.7	113574
F8	7	31135.4	113793
F9	7	30867.9	108634
F10	7	32024.1	117152
F11	7	32420.9	138484
F12	7	54846.5	137900
G1	7	49061.1	136558
G2	7	58903	141662
G3	7	39376.9	105495
G4	7	32203.6	137838
G5	7	27469.2	103012
G6	7	29925.8	109326
G7	7	29143.6	110772
G8	7	36722.3	120797
G9	7	34970.1	112455
G10	7	37007	118474
G11	7	80835.1	148178
G12	7	43005.1	138787
H1	7	59164.2	158108
H2	7	45396	155966
H3	7	37124	133483
H4	7	38079.2	149113
H5	7	30487.7	119199
H6	7	38628.7	137097
H7	7	33523.7	138649
H8	7	36070.3	124182
H9	7	33346.4	129258
H10	7
H11	7
H12	7
A1	8	22166.1	95235.5
A2	8	35831.8	101481
A3	8	32754.3	104953
A4	8	35199.8	96832.5
A5	8	30670.3	101262
A6	8	47951.1	129570
A7	8	47971.6	103194
A8	8	169494	336407
A9	8	41008.6	106017
A10	8	30351.9	116820
A11	8	32491.3	131649
A12	8	33976.6	130473
B1	8	39850.3	125597
B2	8	42624.2	112816
B3	8	33180.3	108742
B4	8	29855.5	108239
B5	8	29943	124421
B6	8	24742.2	110930
B7	8	28194.5	108214
B8	8	106925	334214
B9	8	33555.7	101068
B10	8	38005.8	119196
B11	8	42869.6	140636
B12	8	46453.8	149152
C1	8	44606.2	127462
C2	8	49223.1	159500
C3	8	37197.1	108841
C4	8	32013.9	116376
C5	8	29826.1	103151
C6	8	28510	111499
C7	8	33596.1	106896
C8	8	33132.6	105040
C9	8	33300.5	99694.4
C10	8	30508.1	113041
C11	8	33250.4	138940
C12	8	43826.6	142943
D1	8	51153.8	135367
D2	8	40099.9	126547
D3	8	40022.6	115091
D4	8	32109.7	125471
D5	8	29765.6	105881
D6	8	37427.4	115445
D7	8	28064.9	105339
D8	8	30193.6	111594
D9	8	39818.3	105476
D10	8	38364.9	114829
D11	8	43022.3	146917
D12	8	157642	158076
E1	8	49705.3	125774
E2	8	50586.6	122470
E3	8	68715.2	115179
E4	8	35585.7	137791
E5	8	28157.9	105835
E6	8	29195	119152
E7	8	37056.5	106504
E8	8	34491.8	115290
E9	8	34427.3	109062
E10	8	36624.3	112854
E11	8	61996.7	140200
E12	8	58769	138171
F1	8	50063.1	141312
F2	8	50472.3	127436
F3	8	36120.1	119800
F4	8	36421.2	135038
F5	8	28378.6	108499
F6	8	58727.8	130570
F7	8	29225.8	112955
F8	8	30788.3	113915
F9	8	30705.3	108536
F10	8	32047	117042
F11	8	32369.7	138491
F12	8	54506.3	137524
G1	8	48634.7	135856
G2	8	58961.7	141461
G3	8	39106.3	105842
G4	8	32041.7	137572
G5	8	27551.6	102538
G6	8	29821.4	109344
G7	8	29260.3	110111
G8	8	36680.2	120430
G9	8	34452	112423
G10	8	36694.4	118142
G11	8	79991.2	147340
G12	8	42456.9	138425
H1	8	59281.5	157762
H2	8	44823.9	155475
H3	8	37115.9	133050
H4	8	38052.1	148569
H5	8	30168.2	118647
H6	8	38618.8	136447
H7	8	33609.2	138192
H8	8	35643.5	123672
H9	8	33271.2	128423
H10	8
H11	8
H12	8
A1	9	21809	94950.9
A2	9	36195.1	101586
A3	9	32656.1	104559
A4	9	34811.8	97067.4
A5	9	30519.4	100980
A6	9	47415.8	129524
A7	9	47521.1	102744
A8	9	167160	335050
A9	9	41206.8	105275
A10	9	30253	116192
A11	9	32588.8	131340
A12	9	33572.9	129859
B1	9	39854.9	125077
B2	9	43052.6	112628
B3	9	33008.4	108565
B4	9	30062.3	108385
B5	9	29444.8	124385
B6	9	24870.1	111153
B7	9	27900.1	108059
B8	9	107055	333075
B9	9	33277.6	100761
B10	9	38022.4	118877
B11	9	42802.8	140856
B12	9	46134.4	148946
C1	9	44439.6	127225
C2	9	49338.9	159352
C3	9	37428.3	108823
C4	9	32196.2	116529
C5	9	29959	102956
C6	9	28268.2	111691
C7	9	33493.2	106987
C8	9	33032.8	104864
C9	9	32812.1	99294.7
C10	9	30634.4	112836
C11	9	33399.6	138596
C12	9	43401.9	142760
D1	9	51052.9	134907
D2	9	39902.3	126560
D3	9	40184.8	115088
D4	9	32287.9	125472
D5	9	30173.7	105971
D6	9	37799.9	115502
D7	9	28303.2	105565
D8	9	29961.2	111570
D9	9	39892.6	105324
D10	9	38148.5	114505
D11	9	42996.8	146452
D12	9	156283	157642
E1	9	49337.7	125738
E2	9	50258.1	122345
E3	9	68038.5	115407
E4	9	35445.4	137735
E5	9	27878	105761
E6	9	29293.9	119260
E7	9	37110.6	106193
E8	9	34672.6	115437
E9	9	34308.7	108747
E10	9	36643.4	112864
E11	9	61758.7	140164
E12	9	58526.2	137527
F1	9	49771.2	141133
F2	9	50428.7	127102
F3	9	36050.7	119976
F4	9	36645.5	134810
F5	9	28387.9	108389
F6	9	58398.2	130338
F7	9	29437.4	113051
F8	9	30758.7	113695
F9	9	30750.6	108498
F10	9	31589.5	116666
F11	9	32482.4	138187
F12	9	54340.7	136619
G1	9	48957.3	136067
G2	9	58289.1	141483
G3	9	39035	106131
G4	9	32188.5	137399
G5	9	27485.8	102614
G6	9	29874.6	109123
G7	9	29530.2	110316
G8	9	36929.7	120262
G9	9	34540.3	112151
G10	9	36608.1	118098
G11	9	79677.7	147231
G12	9	42625.2	137871
H1	9	58947.6	157050
H2	9	45002.5	155502
H3	9	37134.8	132848
H4	9	38106.4	148054
H5	9	30256.6	118592
H6	9	38205.1	136512
H7	9	33544.2	137823
H8	9	35658.3	123422
H9	9	33140.6	128247
H10	9
H11	9
H12	9
A1	10	21821.2	94464.8
A2	10	36154.9	101328
A3	10	32667.7	104405
A4	10	34994.8	96641.1
A5	10	30466.7	100336
A6	10	47303.6	129141
A7	10	47243	102497
A8	10	165532	332946
A9	10	40726.3	104833
A10	10	30254.5	115351
A11	10	32832.6	131340
A12	10	33473.4	129083
B1	10	40061.5	124762
B2	10	42343.7	112412
B3	10	33174.4	107863
B4	10	29981.9	108370
B5	10	29491.1	124413
B6	10	24375.7	111006
B7	10	28011.8	107891
B8	10	106046	331947
B9	10	33305.2	100542
B10	10	37440.1	118913
B11	10	42553.2	139867
B12	10	46458.5	148203
C1	10	44595.5	126988
C2	10	49041.4	159464
C3	10	37295	108684
C4	10	32043.7	116164
C5	10	29658.3	103202
C6	10	28549.2	111362
C7	10	33389.4	106715
C8	10	32859.8	104864
C9	10	32762.2	98801.5
C10	10	30167.6	112469
C11	10	33267.6	138341
C12	10	43332.1	142073
D1	10	50504.5	134629
D2	10	40019.1	126592
D3	10	39843.3	114783
D4	10	32009.7	125365
D5	10	29973.4	105559
D6	10	37751.3	115499
D7	10	27971.6	105063
D8	10	30428.4	111660
D9	10	39275.9	104707
D10	10	38110.9	114515
D11	10	42643.2	146314
D12	10	155895	157306
E1	10	49319.7	125684
E2	10	50000.4	122105
E3	10	67978	114945
E4	10	35553.5	137553
E5	10	27939.5	105484
E6	10	29170.6	118807
E7	10	36986.8	106289
E8	10	34633.1	115273
E9	10	34225.4	108513
E10	10	36553.3	113298
E11	10	61280.2	139626
E12	10	57975	137029
F1	10	49492.6	141180
F2	10	49876.1	126917
F3	10	36164.3	119717
F4	10	36575.6	135149
F5	10	28416	108664
F6	10	58245.1	129955
F7	10	29248.8	112720
F8	10	30657.6	113607
F9	10	30715.2	108320
F10	10	31924.1	116371
F11	10	32405	138053
F12	10	54287.1	136463
G1	10	48938.9	135926
G2	10	58231.9	141478
G3	10	38940.2	105898
G4	10	31832	137508
G5	10	27513.5	102401
G6	10	29836.6	108717
G7	10	29163.9	110016
G8	10	36712.6	119848
G9	10	34290.3	112085
G10	10	36389.9	117965
G11	10	79116.7	146739
G12	10	42393.7	137587
H1	10	58654	156957
H2	10	44875.8	155047
H3	10	37053	132896
H4	10	37963.9	148113
H5	10	30228.7	118413
H6	10	38453.9	136143
H7	10	33565.6	137402
H8	10	35443.8	123264
H9	10	32959.1	127380
H10	10
H11	10
H12	10
A1	11	22184.8	94007.9
A2	11	36141.2	101325
A3	11	32567.6	104368
A4	11	34313.3	96510.7
A5	11	30303.2	100408
A6	11	46887.4	129229
A7	11	47238.7	102606
A8	11	164814	332444
A9	11	40723.4	105227
A10	11	30250.5	115223
A11	11	32311.5	131090
A12	11	33555.9	128783
B1	11	40258.4	125195
B2	11	42246.8	112075
B3	11	33344.3	108119
B4	11	30291.6	108066
B5	11	29471.5	123907
B6	11	24742.9	110499
B7	11	28086.7	107874
B8	11	106633	332014
B9	11	33292.5	100381
B10	11	37394.3	118843
B11	11	42339.5	139694
B12	11	46066.6	147842
C1	11	44359.7	127171
C2	11	49199.1	159166
C3	11	37250.6	108387
C4	11	32179.6	116343
C5	11	30053.5	102701
C6	11	28431.1	111276
C7	11	33293.6	106676
C8	11	32909	104771
C9	11	32628.9	98523.1
C10	11	30458.2	111846
C11	11	33383.3	138209
C12	11	43041.7	141912
D1	11	50549.4	134439
D2	11	40218.8	126553
D3	11	39959.1	114530
D4	11	31999.7	125713
D5	11	29912.4	105613
D6	11	37738	115198
D7	11	27848.8	105202
D8	11	30346	111411
D9	11	39437	104631
D10	11	37909.8	114401
D11	11	42771.2	146571
D12	11	155336	156627
E1	11	49222.2	125664
E2	11	50052.8	121805
E3	11	68006.8	114881
E4	11	35390.1	138267
E5	11	28183.5	105597
E6	11	29291.6	118711
E7	11	36674.8	106231
E8	11	34527.5	115206
E9	11	34095.1	108577
E10	11	36572.3	112904
E11	11	61036.4	139502
E12	11	57581.4	136993
F1	11	49597.9	140931
F2	11	49922.9	126642
F3	11	36036.2	120109
F4	11	36427	135014
F5	11	28464.7	108488
F6	11	57988.4	130163
F7	11	29333.3	112583
F8	11	30896.3	113400
F9	11	30853.2	108088
F10	11	31759.2	116095
F11	11	32460	137624
F12	11	53745.2	135864
G1	11	49029.1	135691
G2	11	58238	141686
G3	11	38701.9	105938
G4	11	32290.2	137388
G5	11	27345	102438
G6	11	29712.7	108779
G7	11	28849.4	109802
G8	11	36558.6	119759
G9	11	33983.7	112322
G10	11	35948.9	117968
G11	11	78737.4	146561
G12	11	42064.8	137285
H1	11	58438.5	155556
H2	11	44653.4	154959
H3	11	37217.5	132937
H4	11	37566.9	147821
H5	11	29958.2	118249
H6	11	38241.4	136038
H7	11	33324.5	137203
H8	11	35292.9	123463
H9	11	32963.6	127376
H10	11
H11	11
H12	11
A1	12	21881.7	93590
A2	12	35964.4	100935
A3	12	31835.6	104029
A4	12	34543.4	96322
A5	12	30283.1	100574
A6	12	47081.9	128597
A7	12	46752.1	102271
A8	12	164805	330574
A9	12	40463.4	104513
A10	12	29771	114764
A11	12	32344.2	130599
A12	12	33633.5	128680
B1	12	39819.4	124646
B2	12	42271.2	112028
B3	12	33506.9	108370
B4	12	29753.1	107713
B5	12	29445.5	123895
B6	12	24657.7	111277
B7	12	27987	108256
B8	12	106487	330934
B9	12	33105.3	100227
B10	12	37266	118498
B11	12	42388.3	139508
B12	12	45670.3	147752
C1	12	44451.4	126928
C2	12	49456.7	159082
C3	12	37105.7	108525
C4	12	32115.9	116372
C5	12	29765.9	103190
C6	12	28686.3	111204
C7	12	33123.4	106994
C8	12	33051.2	104810
C9	12	32950.7	98571.7
C10	12	30208.1	112186
C11	12	33461.2	138020
C12	12	43461.7	141818
D1	12	50558.5	134633
D2	12	39666.9	126356
D3	12	39867	114775
D4	12	32237.8	125734
D5	12	30235.1	105890
D6	12	37680.1	115220
D7	12	28165.8	104869
D8	12	30384.5	111767
D9	12	39361.2	104744
D10	12	38152.8	114658
D11	12	42436.2	145944
D12	12	154386	156505
E1	12	49153	125417
E2	12	50159.2	121789
E3	12	67364.6	114747
E4	12	35098.5	137645
E5	12	28220.2	105581
E6	12	29078.5	118912
E7	12	36667.8	106009
E8	12	34273.5	115251
E9	12	34449.6	108501
E10	12	36551.5	112505
E11	12	60943.2	139084
E12	12	57150.8	136602
F1	12	49519.1	141158
F2	12	49826.4	126713
F3	12	36048.4	120052
F4	12	36145.7	134721
F5	12	28268.7	108864
F6	12	57924.5	130131
F7	12	29282	112273
F8	12	30756	113573
F9	12	30602.7	107998
F10	12	31617.1	115883
F11	12	32279.4	137508
F12	12	54062.5	135700
G1	12	48477.1	135406
G2	12	58016.1	141547
G3	12	38603.1	105999
G4	12	32227.3	137283
G5	12	27236	102234
G6	12	29619.8	108496
G7	12	29319.8	109476
G8	12	36844.5	119525
G9	12	34222.8	111940
G10	12	36253.2	118170
G11	12	78349.9	146504
G12	12	41910	137227
H1	12	58342.8	156171
H2	12	44572.8	154466
H3	12	36974.5	132327
H4	12	37943.7	147421
H5	12	30075.7	118317
H6	12	38502.7	135838
H7	12	33463.1	136822
H8	12	35329.8	123145
H9	12	32763.3	126743
H10	12
H11	12
H12	12
A1	13	22029.5	93775.6
A2	13	35434.6	100807
A3	13	32266.7	103735
A4	13	34409.3	96200.3
A5	13	30418.3	100199
A6	13	46640.5	128825
A7	13	46805	102093
A8	13	163804	330795
A9	13	40548.6	104383
A10	13	29952.3	114431
A11	13	32264.4	130504
A12	13	33289.4	127767
B1	13	39437.2	124081
B2	13	42353	111810
B3	13	33631.3	108458
B4	13	29704.2	107913
B5	13	29211.7	123706
B6	13	24584.4	110495
B7	13	27637.4	108148
B8	13	106174	330515
B9	13	32965.9	100016
B10	13	37415.1	118366
B11	13	42339.1	139060
B12	13	45698.7	147648
C1	13	44450.4	127046
C2	13	49330.1	159146
C3	13	37182.1	108388
C4	13	31745.3	116094
C5	13	29765.7	102563
C6	13	28506.9	110763
C7	13	32864.2	107061
C8	13	32810	104622
C9	13	32942.8	98478.3
C10	13	30134.1	111815
C11	13	33227.6	137637
C12	13	42823.4	141160
D1	13	50041.6	133993
D2	13	39965.6	126055
D3	13	39686.7	114324
D4	13	32008.8	126188
D5	13	30079.3	105886
D6	13	37543.8	115109
D7	13	27838.4	104826
D8	13	30572.2	111764
D9	13	39070.9	104548
D10	13	37797.1	114096
D11	13	42397.7	145777
D12	13	153158	156120
E1	13	48906	125555
E2	13	49751.5	121869
E3	13	67193.5	114565
E4	13	35380.4	137591
E5	13	28283.2	105251
E6	13	29170.7	119135
E7	13	36280.1	105799
E8	13	34463.4	115157
E9	13	34003.7	108092
E10	13	36556	112670
E11	13	60484.3	139075
E12	13	57224.4	136218
F1	13	49303.3	141185
F2	13	49713.5	126457
F3	13	36185	120148
F4	13	36272.9	134868
F5	13	28338.4	108864
F6	13	57797	130159
F7	13	29353.3	112271
F8	13	30836.5	113248
F9	13	30643.5	108261
F10	13	31288.2	115328
F11	13	32180.4	137186
F12	13	53819.9	135290
G1	13	48546.3	135368
G2	13	57809.3	141341
G3	13	38441.9	106230
G4	13	32065	137312
G5	13	27463.8	101944
G6	13	29663.9	108562
G7	13	29182.3	109478
G8	13	36949.7	119512
G9	13	34056.7	112032
G10	13	35902.8	117537
G11	13	77561	146030
G12	13	42068.1	136905
H1	13	58205.8	155110
H2	13	44865.7	155025
H3	13	36841.8	132342
H4	13	37856.9	147576
H5	13	29856.7	117868
H6	13	37887.7	135737
H7	13	33304.2	136669
H8	13	35193.8	123237
H9	13	32870.1	126282
H10	13
H11	13
H12	13
A1	14	21589.4	93469.5
A2	14	35615.7	100686
A3	14	32033.6	103750
A4	14	34155.5	95581.4
A5	14	30278.5	99803.2
A6	14	46705.9	128571
A7	14	47462.8	101440
A8	14	162733	329738
A9	14	40141.4	104710
A10	14	30379.4	114080
A11	14	32498.4	129976
A12	14	33525.4	127781
B1	14	39280	123774
B2	14	41851.9	112140
B3	14	33399.8	108126
B4	14	30057.5	107661
B5	14	29446.2	123648
B6	14	24647.5	110894
B7	14	27935.1	108204
B8	14	106505	328090
B9	14	32887.1	99892.6
B10	14	37430.7	118103
B11	14	41833.5	138881
B12	14	46327.7	147003
C1	14	43813.6	126843
C2	14	49331.9	158652
C3	14	37285.9	108513
C4	14	31773.2	116419
C5	14	29708.7	102936
C6	14	28431.5	110979
C7	14	32935.4	106881
C8	14	32901.1	104746
C9	14	32852	98405.3
C10	14	29954	111382
C11	14	33205.9	137392
C12	14	43015.1	140823
D1	14	50236	134269
D2	14	39574.9	125908
D3	14	39616.1	114048
D4	14	32275.2	126298
D5	14	30294.1	106014
D6	14	37329.5	115152
D7	14	27758.2	104818
D8	14	30469.2	111859
D9	14	38723.4	104228
D10	14	37731.1	113832
D11	14	42186.9	145629
D12	14	152251	155908
E1	14	48671.5	125362
E2	14	49520.6	121880
E3	14	66742.4	114365
E4	14	35233.6	137695
E5	14	28015.9	104998
E6	14	28910.2	118500
E7	14	36387.3	106001
E8	14	34537.9	114855
E9	14	33984.6	107877
E10	14	36449.9	112706
E11	14	60191.5	138784
E12	14	56929.6	135754
F1	14	49282.2	141270
F2	14	49307.5	126094
F3	14	35791.1	120339
F4	14	36391.8	134919
F5	14	28320.6	108775
F6	14	57466	130158
F7	14	29042.4	112065
F8	14	30708.6	113098
F9	14	30556.9	107994
F10	14	31502.5	115008
F11	14	32331.6	137123
F12	14	53631	135190
G1	14	48719.4	135099
G2	14	57792.5	141615
G3	14	38327.3	106174
G4	14	32361.7	137114
G5	14	27430	102040
G6	14	29636.7	108359
G7	14	29199.2	109190
G8	14	36631.4	119194
G9	14	34166.8	111728
G10	14	36160.6	117747
G11	14	77775.8	146287
G12	14	41876.9	136174
H1	14	58627.9	154886
H2	14	44738.2	154832
H3	14	36698	132259
H4	14	37678.5	147026
H5	14	30057.5	117908
H6	14	38046.5	135544
H7	14	33352.3	136269
H8	14	35059.9	123023
H9	14	32759.5	125717
H10	14
H11	14
H12	14
A1	15	21762	93438.2
A2	15	35836.2	100496
A3	15	31935.2	104010
A4	15	34041	95575.5
A5	15	30495	99555.3
A6	15	46590.2	128217
A7	15	51223	101588
A8	15	162766	328377
A9	15	40224.6	104277
A10	15	30286.3	114184
A11	15	32216.4	129430
A12	15	33191.7	127236
B1	15	39253.9	123706
B2	15	41997.7	111268
B3	15	33107.5	107944
B4	15	29878.7	107126
B5	15	29118.3	123797
B6	15	24871.9	110435
B7	15	27877	107909
B8	15	105704	328033
B9	15	32911.9	99858.4
B10	15	37234.8	117995
B11	15	42039.6	138674
B12	15	46080.4	146507
C1	15	43741.3	126560
C2	15	48993.2	158412
C3	15	36983.4	108109
C4	15	31692.9	115901
C5	15	29685.4	102412
C6	15	28563.9	111008
C7	15	32825.8	107136
C8	15	32714.8	104831
C9	15	32759.2	97813.8
C10	15	30227	111815
C11	15	33366.9	136967
C12	15	43043.5	140619
D1	15	50129.2	134058
D2	15	39531.3	126304
D3	15	39478	113615
D4	15	32211.9	126271
D5	15	30228.3	105632
D6	15	37401.1	115009
D7	15	27786.9	104509
D8	15	30727.7	111876
D9	15	38657.9	103928
D10	15	37708.9	113907
D11	15	42092.1	145177
D12	15	151743	155647
E1	15	49071.5	125441
E2	15	49496.2	121306
E3	15	66638.1	114248
E4	15	34826.6	137409
E5	15	27955.3	105210
E6	15	29026.4	118685
E7	15	36203.6	105864
E8	15	34216.4	114971
E9	15	33778.5	107930
E10	15	36665.5	112613
E11	15	59836.9	138543
E12	15	56881.6	135478
F1	15	49087.7	140701
F2	15	49476.3	126614
F3	15	35878.4	120547
F4	15	35987.2	135090
F5	15	28524.4	108818
F6	15	57301.1	129969
F7	15	29097.1	111524
F8	15	30703.4	113124
F9	15	30739.1	107711
F10	15	31479.8	114930
F11	15	32276.1	137177
F12	15	53723.3	134407
G1	15	48507	134840
G2	15	57604.1	141335
G3	15	38654.3	106508
G4	15	32243.1	136947
G5	15	27328.7	101879
G6	15	29604.6	108156
G7	15	29152.4	108996
G8	15	36716.1	118981
G9	15	33885.3	111400
G10	15	35607	117574
G11	15	77623.6	145786
G12	15	42291.5	136554
H1	15	58228.1	154356
H2	15	44639.4	154301
H3	15	36624.8	132422
H4	15	37517	146370
H5	15	30022.6	117594
H6	15	38086.3	135318
H7	15	33189.1	135596
H8	15	34891.3	122728
H9	15	32674.9	125350
H10	15
H11	15
H12	15
A1	16	21731.8	92999.8
A2	16	35592.2	100795
A3	16	31802	103115
A4	16	34370.3	95356.3
A5	16	29957.7	99387.9
A6	16	46310.1	128319
A7	16	54932.5	101709
A8	16	162871	326256
A9	16	39828.6	103865
A10	16	30052.4	113915
A11	16	32221.2	129566
A12	16	33420.6	126972
B1	16	39298	123797
B2	16	41413.8	111282
B3	16	33010	107722
B4	16	30048	107390
B5	16	29054.7	123313
B6	16	24766.8	110863
B7	16	27650.6	108321
B8	16	105144	327463
B9	16	32775.2	99715.5
B10	16	36833.9	117599
B11	16	42147.3	138590
B12	16	45876.9	146042
C1	16	43815.1	126571
C2	16	48704.5	158101
C3	16	36654.5	108097
C4	16	31776.6	115989
C5	16	29567.9	102183
C6	16	28365.2	110840
C7	16	32974.2	107256
C8	16	32814.5	104575
C9	16	32400.8	97855.4
C10	16	30167.3	111567
C11	16	33528.4	136672
C12	16	42718.5	140138
D1	16	50329.7	133526
D2	16	39676.3	125959
D3	16	39422.6	114021
D4	16	32242.2	126395
D5	16	30127.1	105544
D6	16	37437.4	115001
D7	16	27767.9	104770
D8	16	30986.9	112108
D9	16	38748.5	103666
D10	16	37529.7	114063
D11	16	42140.4	144857
D12	16	151470	154964
E1	16	48931.3	125697
E2	16	49376.7	121429
E3	16	66044.4	114364
E4	16	34749.2	137351
E5	16	28599.1	104926
E6	16	29209	118862
E7	16	36641.2	105899
E8	16	34210.9	115182
E9	16	34146	107763
E10	16	36898.1	112294
E11	16	60158.7	138693
E12	16	56544.5	135197
F1	16	49151.5	141120
F2	16	49169.9	126183
F3	16	36030.2	120793
F4	16	36244	135449
F5	16	28379.8	108936
F6	16	57225.8	130312
F7	16	29269.2	111542
F8	16	30548.1	113214
F9	16	30579.7	107910
F10	16	31417.9	114942
F11	16	32659.1	136652
F12	16	53521.8	134448
G1	16	48210.7	135068
G2	16	57649.1	140911
G3	16	38166.6	106672
G4	16	31893	136905
G5	16	27518.9	101955
G6	16	29763.1	107814
G7	16	29154.5	108837
G8	16	36613.4	118842
G9	16	33628.8	111837
G10	16	35713.1	117574
G11	16	77185.2	145716
G12	16	42169.6	136287
H1	16	57999.2	153494
H2	16	44485.5	154680
H3	16	36687.5	132075
H4	16	37562.4	146662
H5	16	29900.6	117855
H6	16	38004.7	135136
H7	16	33195.2	136014
H8	16	35225.8	122589
H9	16	32572.6	125328
H10	16
H11	16
H12	16
A1	17	21671.1	92858.8
A2	17	35387.2	100665
A3	17	32304.8	103803
A4	17	33902	95266.2
A5	17	30113	99241.2
A6	17	45866.5	128160
A7	17	58466.4	101349
A8	17	161879	326542
A9	17	39478.4	103628
A10	17	30245.8	113918
A11	17	32030.3	129310
A12	17	33260.1	126599
B1	17	39313.2	123221
B2	17	41857.5	111915
B3	17	33193	107922
B4	17	29872.3	107410
B5	17	29151.7	122995
B6	17	24874.7	110673
B7	17	27855.2	108155
B8	17	105042	326306
B9	17	32412.3	99495.8
B10	17	37016.1	117489
B11	17	41839.4	138592
B12	17	46056	145892
C1	17	44192.9	126802
C2	17	48935.4	157716
C3	17	36950.5	108277
C4	17	31799.8	116004
C5	17	29934.7	102080
C6	17	28474.2	110705
C7	17	32625.7	107176
C8	17	32861.4	104652
C9	17	32500	97919.8
C10	17	29962.3	111525
C11	17	33482.9	137124
C12	17	42885	140341
D1	17	49680	133506
D2	17	39542	125922
D3	17	39082.9	113731
D4	17	32144.7	126812
D5	17	30082.4	105783
D6	17	37160.1	115137
D7	17	27686.5	104344
D8	17	30656.6	112253
D9	17	38460.4	103518
D10	17	37737.3	113788
D11	17	42377.1	144829
D12	17	150498	154539
E1	17	48626.9	125558
E2	17	49193.2	121504
E3	17	66197.1	113907
E4	17	34697	137352
E5	17	28124.6	104705
E6	17	28832	118808
E7	17	35918.8	105698
E8	17	34003.2	115231
E9	17	33955.8	107663
E10	17	36920.1	112443
E11	17	59757	138347
E12	17	56541	135160
F1	17	49018.6	141016
F2	17	48827.4	126229
F3	17	35938.5	120680
F4	17	36486	135269
F5	17	28379.7	109037
F6	17	56711.8	130362
F7	17	29489.8	111473
F8	17	30628.9	113052
F9	17	30483.6	108168
F10	17	31688.2	114331
F11	17	32308	136467
F12	17	53481.4	134341
G1	17	48662.6	135192
G2	17	57270.2	141078
G3	17	38416.9	106605
G4	17	32165.9	137086
G5	17	27259.1	101675
G6	17	29526.8	108043
G7	17	28941.8	108549
G8	17	36869.3	118496
G9	17	33925.5	111914
G10	17	36060.7	117550
G11	17	76647.8	145674
G12	17	42308.5	135925
H1	17	57749.1	153442
H2	17	44432.3	153704
H3	17	36552.3	132210
H4	17	37266.1	146299
H5	17	29873.6	117510
H6	17	38074.4	134992
H7	17	33200	135431
H8	17	35017.1	122379
H9	17	32429.3	124793
H10	17
H11	17
H12	17
A1	18	21495.7	92287.9
A2	18	35079.6	100052
A3	18	32105.2	103117
A4	18	33883.8	95003.8
A5	18	30199.3	99234.1
A6	18	45890	127834
A7	18	58596.8	101055
A8	18	160743	326376
A9	18	39750.3	103503
A10	18	30450.4	112850
A11	18	32435.5	129077
A12	18	33409	125793
B1	18	39750.7	123402
B2	18	41357.3	110939
B3	18	32941.4	108147
B4	18	30157.4	106941
B5	18	29302	122942
B6	18	24671.1	110877
B7	18	27745.5	108328
B8	18	105620	326340
B9	18	32724.3	99364.8
B10	18	36836.8	117539
B11	18	41735.3	138123
B12	18	45491.7	145567
C1	18	43932	126585
C2	18	49145.3	158375
C3	18	37072.1	108167
C4	18	31730.4	116034
C5	18	30003.3	102554
C6	18	28416.1	110435
C7	18	32753.4	107252
C8	18	32658.7	104808
C9	18	32590.2	97487.1
C10	18	30437.8	111313
C11	18	33973.8	136064
C12	18	42991	139402
D1	18	50246.7	133891
D2	18	39924	126298
D3	18	39314.6	113484
D4	18	32251.1	126686
D5	18	30262.4	105890
D6	18	37414	114722
D7	18	27723.1	104552
D8	18	30689.8	112109
D9	18	38612	103383
D10	18	37739.9	113762
D11	18	42455	144589
D12	18	150245	154140
E1	18	49048.5	125559
E2	18	49324.9	121027
E3	18	66065	114045
E4	18	34709.6	137290
E5	18	28309.6	104846
E6	18	29022.7	118669
E7	18	36144.1	106158
E8	18	34024.5	115112
E9	18	33826.8	107394
E10	18	37717.4	112680
E11	18	59784.9	137843
E12	18	56450.2	134668
F1	18	49401.8	141105
F2	18	49056.2	125975
F3	18	36177.1	120866
F4	18	36230.7	134934
F5	18	28253.2	109074
F6	18	56561.7	130237
F7	18	29379.2	111308
F8	18	30552.8	112959
F9	18	30376.2	107882
F10	18	31801.7	114233
F11	18	32448.6	136350
F12	18	53408.8	133816
G1	18	48530.7	134407
G2	18	57630	141350
G3	18	38274.8	106640
G4	18	32452.5	137023
G5	18	27450.6	101569
G6	18	29916.4	107669
G7	18	29264.8	108482
G8	18	36700.8	118646
G9	18	33600.6	111754
G10	18	36350.2	117612
G11	18	77435.2	145188
G12	18	42694.9	135913
H1	18	57881.7	152708
H2	18	44169.1	154104
H3	18	36475.8	131855
H4	18	37327.9	146282
H5	18	29742.2	117358
H6	18	37889.2	135011
H7	18	33495	135266
H8	18	34845.5	122502
H9	18	32630.2	124628
H10	18
H11	18
H12	18
A1	19	21182.5	92077.8
A2	19	35052.3	100261
A3	19	32286.8	103131
A4	19	34063	94983.6
A5	19	29711.7	99118.4
A6	19	45636.5	128004
A7	19	58388.5	100643
A8	19	159466	324752
A9	19	39282	103183
A10	19	30230.8	112679
A11	19	32240.9	128900
A12	19	33438.3	125472
B1	19	38802.3	123199
B2	19	41379.7	111091
B3	19	33430	107571
B4	19	30082.3	107160
B5	19	29180.9	122808
B6	19	24596.3	110503
B7	19	27697.8	108354
B8	19	104281	325527
B9	19	32646.2	99243.6
B10	19	37331.5	117344
B11	19	41701.9	137729
B12	19	45703.7	145288
C1	19	43540.8	126299
C2	19	48115.5	157587
C3	19	36517.4	108143
C4	19	31757.1	115825
C5	19	29738.8	101788
C6	19	28494.5	110750
C7	19	32580.4	107380
C8	19	32613.5	104621
C9	19	32570.2	97304.5
C10	19	30463.9	111055
C11	19	34391.7	136381
C12	19	43036.6	139127
D1	19	49472	133237
D2	19	40065.1	125838
D3	19	39311	113624
D4	19	32481.1	126829
D5	19	30156.6	105384
D6	19	36996.3	114591
D7	19	27664	104345
D8	19	30274.9	112465
D9	19	38183.5	103363
D10	19	38396.6	113467
D11	19	43154.5	144175
D12	19	150055	154254
E1	19	48903.7	125602
E2	19	49414.7	120833
E3	19	65904	113553
E4	19	34892.4	137155
E5	19	28309.1	104915
E6	19	29030.1	118630
E7	19	36012.1	105784
E8	19	33981.4	115203
E9	19	33956.9	107412
E10	19	38966.3	112596
E11	19	59691.2	137774
E12	19	57052.8	134585
F1	19	49526.4	140743
F2	19	49012.6	125933
F3	19	36214.2	120700
F4	19	36144.6	134961
F5	19	28288.6	109193
F6	19	56249	130120
F7	19	29325.2	110927
F8	19	30706.2	113422
F9	19	30700.5	107981
F10	19	32006.2	113844
F11	19	33043	136173
F12	19	54139.6	133495
G1	19	48133.5	134718
G2	19	57601.8	141225
G3	19	38349.4	106870
G4	19	32383.6	136797
G5	19	27643.6	101655
G6	19	29825.2	107448
G7	19	29139.8	108206
G8	19	36576.2	118226
G9	19	33953.5	111643
G10	19	36796.2	117673
G11	19	77770.1	145203
G12	19	43345.7	135255
H1	19	57761.8	152937
H2	19	44276.9	153510
H3	19	36200.8	132074
H4	19	37128.6	146047
H5	19	29759.6	117162
H6	19	37832.6	134787
H7	19	33260	135345
H8	19	34876	122483
H9	19	32517	124283
H10	19
H11	19
H12	19
A1	20	21165.7	92482.8
A2	20	35749	100298
A3	20	31954.4	103192
A4	20	34065.6	94825.1
A5	20	29741.5	98906.6
A6	20	45641.5	127463
A7	20	57611.2	101050
A8	20	159647	323839
A9	20	39628.6	103265
A10	20	30871.4	112884
A11	20	32581.3	128634
A12	20	34012.7	124896
B1	20	39370.5	123304
B2	20	41580	110930
B3	20	33349.7	107873
B4	20	29686.1	107243
B5	20	29626	122982
B6	20	24499.6	110661
B7	20	28032.1	108472
B8	20	105039	324611
B9	20	32426.5	99206.5
B10	20	36981	117555
B11	20	42327.3	137957
B12	20	45305.3	144821
C1	20	43630.3	126622
C2	20	48084.9	157563
C3	20	36971.7	107923
C4	20	32053.9	115812
C5	20	29861	102231
C6	20	28478.5	110725
C7	20	32581.9	107476
C8	20	32976.6	104594
C9	20	32632.9	97083.4
C10	20	31545.8	111175
C11	20	34774	135951
C12	20	43906	139238
D1	20	49985.4	133729
D2	20	39891	125999
D3	20	39082.5	113505
D4	20	32368.2	127019
D5	20	29965.7	105987
D6	20	37116.7	114814
D7	20	27644.5	104170
D8	20	30451.5	112793
D9	20	38429.3	103028
D10	20	39048.7	114072
D11	20	44771.5	144220
D12	20	150495	153925
E1	20	48611.5	125567
E2	20	49338.4	120969
E3	20	65379.8	113710
E4	20	34689.1	137179
E5	20	28132.9	104581
E6	20	29172.5	118610
E7	20	36066.3	106173
E8	20	34217.2	114915
E9	20	34236.8	107186
E10	20	41003.6	112784
E11	20	60310.9	137618
E12	20	57580.5	134510
F1	20	49377.9	140982
F2	20	49032.2	125669
F3	20	36032.3	121205
F4	20	36035.2	135478
F5	20	28395.8	109291
F6	20	56523.6	130467
F7	20	29327.2	111016
F8	20	30790.3	113214
F9	20	30363.2	108095
F10	20	32827	113706
F11	20	33947	135776
F12	20	54898.3	133044
G1	20	48981.7	134692
G2	20	57628.1	141154
G3	20	38269.1	107254
G4	20	32187.9	136669
G5	20	27529.7	101784
G6	20	29961.3	107570
G7	20	29069.3	108357
G8	20	36591	118377
G9	20	33630.9	111975
G10	20	38109.7	117420
G11	20	79104	144897
G12	20	45233.5	135771
H1	20	57931	152379
H2	20	43875	153483
H3	20	36711.9	132028
H4	20	37168.6	145973
H5	20	29495.9	117282
H6	20	37902.1	134648
H7	20	33084	134811
H8	20	34888.7	122102
H9	20	32337.3	124072
H10	20
H11	20
H12	20
A1	21	21265	92332.4
A2	21	35279.3	100045
A3	21	32429.4	103043
A4	21	33836.2	94776.6
A5	21	29995.5	98978.1
A6	21	45731.5	127531
A7	21	58227.7	100834
A8	21	159471	323148
A9	21	39065.1	103068
A10	21	31140.6	112754
A11	21	33840.9	128779
A12	21	34620.9	124829
B1	21	39101.7	122919
B2	21	41194.3	111352
B3	21	32856.7	107658
B4	21	29831.3	106787
B5	21	29339.1	122370
B6	21	24988.9	110944
B7	21	27862.4	108393
B8	21	105541	323867
B9	21	32477.3	99421.3
B10	21	37282.8	117774
B11	21	42650.1	137775
B12	21	46141.4	144784
C1	21	43713.2	126670
C2	21	46762.8	157363
C3	21	37040.1	108118
C4	21	32211.7	116173
C5	21	29713.5	102193
C6	21	28831	110434
C7	21	32629.5	107350
C8	21	32871.8	104345
C9	21	32289.2	97120.9
C10	21	32191.1	110945
C11	21	36207.9	135892
C12	21	44370.2	138938
D1	21	50239.7	133292
D2	21	39924	126163
D3	21	39290.1	113477
D4	21	31990.1	127182
D5	21	30134.2	105937
D6	21	37194.6	114696
D7	21	27765	104243
D8	21	30579.1	112977
D9	21	37992.3	103098
D10	21	40482.8	113753
D11	21	46020.7	144517
D12	21	151390	153614
E1	21	48902.4	125802
E2	21	49233.1	120922
E3	21	65366.4	113662
E4	21	34783.7	137315
E5	21	28313	104685
E6	21	29275.3	118628
E7	21	35918.5	105785
E8	21	34107.6	114942
E9	21	33753.6	107150
E10	21	44611.4	112706
E11	21	61565.2	137586
E12	21	58932.8	134497
F1	21	49150.8	141262
F2	21	49268.2	125952
F3	21	37053	121166
F4	21	36351	135621
F5	21	28788.1	109505
F6	21	56233.7	130774
F7	21	29201.9	110855
F8	21	30515.3	113158
F9	21	30710	108486
F10	21	34148.7	113980
F11	21	35531.9	136036
F12	21	56142.3	133045
G1	21	48707	135034
[truncated: 10,295 more rows]

## Sheet: Amplification Data
Block Type	96alum
Chemistry	SYBR_GREEN
Experiment File Name	D:\ShuJu\LZM\spx9-12 iaa=lp.eds
Experiment Run End Time	2023-08-17 06:04:16 AM CST
Instrument Type	sds7500
Passive Reference	ROX
Well	Cycle	Target Name	Rn	ΔRn
A1	1	SPX9	0.231702	0.00186963
A1	2	SPX9	0.228315	-0.00180566
A1	3	SPX9	0.229843	-0.000565411
A1	4	SPX9	0.232501	0.00180435
A1	5	SPX9	0.230301	-0.000683219
A1	6	SPX9	0.23254	0.00126755
A1	7	SPX9	0.237203	0.00564246
A1	8	SPX9	0.232751	0.000901759
A1	9	SPX9	0.229687	-0.00244963
A1	10	SPX9	0.230998	-0.00142707
A1	11	SPX9	0.235989	0.00327587
A1	12	SPX9	0.233804	0.000802205
A1	13	SPX9	0.234917	0.00162739
A1	14	SPX9	0.230978	-0.00259918
A1	15	SPX9	0.232903	-0.000962643
A1	16	SPX9	0.233676	-0.000478236
A1	17	SPX9	0.233376	-0.00106539
A1	18	SPX9	0.23292	-0.00181044
A1	19	SPX9	0.23005	-0.00496842
A1	20	SPX9	0.228861	-0.00644512
A1	21	SPX9	0.230309	-0.0052851
A1	22	SPX9	0.234818	-0.00106409
A1	23	SPX9	0.233402	-0.00276872
A1	24	SPX9	0.238438	0.00197939
A1	25	SPX9	0.237678	0.000931178
A1	26	SPX9	0.251375	0.0143405
A1	27	SPX9	0.259469	0.0221458
A1	28	SPX9	0.284966	0.0473544
A1	29	SPX9	0.319017	0.0811181
A1	30	SPX9	0.386224	0.148037
A1	31	SPX9	0.485162	0.246686
A1	32	SPX9	0.624396	0.385632
A1	33	SPX9	0.778055	0.539003
A1	34	SPX9	0.946639	0.707299
A1	35	SPX9	1.0788	0.839174
A1	36	SPX9	1.2113	0.97138
A1	37	SPX9	1.32059	1.08039
A1	38	SPX9	1.41733	1.17684
A1	39	SPX9	1.49227	1.25149
A1	40	SPX9	1.55733	1.31626
A2	1	SPX9	0.358925	0.00213887
A2	2	SPX9	0.353189	-0.00346942
A2	3	SPX9	0.358012	0.00148159
A2	4	SPX9	0.358656	0.00225353
A2	5	SPX9	0.359968	0.00369382
A2	6	SPX9	0.354567	-0.00157844
A2	7	SPX9	0.355129	-0.000888366
A2	8	SPX9	0.353087	-0.00280203
A2	9	SPX9	0.356299	0.000538043
A2	10	SPX9	0.356809	0.00117623
A2	11	SPX9	0.356686	0.00118101
A2	12	SPX9	0.356311	0.000934458
A2	13	SPX9	0.351508	-0.00374012
A2	14	SPX9	0.35373	-0.00139008
A2	15	SPX9	0.356592	0.00160005
A2	16	SPX9	0.353115	-0.00174958
A2	17	SPX9	0.351533	-0.0032025
A2	18	SPX9	0.350615	-0.00399255
A2	19	SPX9	0.349609	-0.00487017
A2	20	SPX9	0.356429	0.00207762
A2	21	SPX9	0.352636	-0.00158767
A2	22	SPX9	0.35592	0.00182494
A2	23	SPX9	0.363007	0.00904021
A2	24	SPX9	0.367589	0.0137506
A2	25	SPX9	0.382221	0.0285101
A2	26	SPX9	0.413393	0.0598107
A2	27	SPX9	0.450529	0.0970747
A2	28	SPX9	0.535142	0.181816
A2	29	SPX9	0.663814	0.310615
A2	30	SPX9	0.861255	0.508185
A2	31	SPX9	1.08653	0.733593
A2	32	SPX9	1.30902	0.956203
A2	33	SPX9	1.49648	1.14379
A2	34	SPX9	1.67312	1.32056
A2	35	SPX9	1.81399	1.46156
A2	36	SPX9	1.95106	1.59876
A2	37	SPX9	2.04135	1.68917
A2	38	SPX9	2.12738	1.77534
A2	39	SPX9	2.18418	1.83226
A2	40	SPX9	2.25561	1.90382
A3	1	SPX9	0.306659	-0.00426535
A3	2	SPX9	0.306151	-0.00474818
A3	3	SPX9	0.311415	0.00054042
A3	4	SPX9	0.313617	0.00276766
A3	5	SPX9	0.310446	-0.000378628
A3	6	SPX9	0.306322	-0.00447758
A3	7	SPX9	0.311747	0.00097195
A3	8	SPX9	0.312084	0.00133473
A3	9	SPX9	0.312323	0.00159777
A3	10	SPX9	0.312895	0.00219479
A3	11	SPX9	0.312046	0.0013712
A3	12	SPX9	0.306027	-0.00462309
A3	13	SPX9	0.311049	0.000423845
A3	14	SPX9	0.308757	-0.00184385
A3	15	SPX9	0.30704	-0.00353567
A3	16	SPX9	0.308412	-0.00213889
A3	17	SPX9	0.311212	0.00068586
A3	18	SPX9	0.311347	0.000845986
A3	19	SPX9	0.313065	0.0025887
A3	20	SPX9	0.309659	-0.000792579
A3	21	SPX9	0.314717	0.00429068
A3	22	SPX9	0.308578	-0.00182333
A3	23	SPX9	0.31635	0.00597305
A3	24	SPX9	0.326439	0.0160871
A3	25	SPX9	0.345862	0.0355353
A3	26	SPX9	0.371668	0.0613658
A3	27	SPX9	0.417266	0.106989
A3	28	SPX9	0.50609	0.195838
A3	29	SPX9	0.649308	0.33908
A3	30	SPX9	0.844318	0.534116
A3	31	SPX9	1.07465	0.764471
A3	32	SPX9	1.28268	0.972532
A3	33	SPX9	1.46754	1.15741
A3	34	SPX9	1.64767	1.33756
A3	35	SPX9	1.77878	1.4687
A3	36	SPX9	1.90302	1.59297
A3	37	SPX9	1.99677	1.68674
A3	38	SPX9	2.07868	1.76867
A3	39	SPX9	2.13177	1.82179
A3	40	SPX9	2.2027	1.89274
A4	1	SPX10	0.361425	0.00196375
A4	2	SPX10	0.359462	-5.44415e-06
A4	3	SPX10	0.361684	0.00221104
A4	4	SPX10	0.360043	0.000563986
A4	5	SPX10	0.361109	0.00162384
A4	6	SPX10	0.358623	-0.000868406
A4	7	SPX10	0.360388	0.000890615
A4	8	SPX10	0.363512	0.00400922
A4	9	SPX10	0.358635	-0.000874073
A4	10	SPX10	0.36211	0.00259539
A4	11	SPX10	0.355539	-0.00398177
A4	12	SPX10	0.358624	-0.000903104
A4	13	SPX10	0.357684	-0.00184891
A4	14	SPX10	0.357344	-0.00219447
A4	15	SPX10	0.356169	-0.00337608
A4	16	SPX10	0.360441	0.000890006
A4	17	SPX10	0.355866	-0.00369079
A4	18	SPX10	0.356657	-0.00290565
A4	19	SPX10	0.35862	-0.000948861
A4	20	SPX10	0.359247	-0.000327782
A4	21	SPX10	0.35701	-0.00257089
A4	22	SPX10	0.362849	0.00326196
A4	23	SPX10	0.362808	0.00321556
A4	24	SPX10	0.364828	0.00522915
A4	25	SPX10	0.372506	0.0129016
A4	26	SPX10	0.392623	0.0330122
A4	27	SPX10	0.425225	0.0656089
A4	28	SPX10	0.481854	0.122232
A4	29	SPX10	0.581128	0.2215
A4	30	SPX10	0.737747	0.378113
A4	31	SPX10	0.960324	0.600684
A4	32	SPX10	1.2113	0.851649
A4	33	SPX10	1.42683	1.06717
A4	34	SPX10	1.62083	1.26117
A4	35	SPX10	1.75832	1.39865
A4	36	SPX10	1.88833	1.52866
A4	37	SPX10	1.97925	1.61957
A4	38	SPX10	2.05768	1.698
A4	39	SPX10	2.10396	1.74428
A4	40	SPX10	2.15207	1.79238
A5	1	SPX10	0.301567	0.00168026
A5	2	SPX10	0.300106	1.13311e-05
A5	3	SPX10	0.302153	0.00185157
A5	4	SPX10	0.298872	-0.00163762
A5	5	SPX10	0.299747	-0.000969684
A5	6	SPX10	0.301346	0.00042209
A5	7	SPX10	0.298149	-0.00298312
A5	8	SPX10	0.302881	0.00154204
A5	9	SPX10	0.302233	0.000686097
A5	10	SPX10	0.303646	0.00189173
A5	11	SPX10	0.3018	-0.000161529
A5	12	SPX10	0.301104	-0.00106581
A5	13	SPX10	0.303578	0.00120158
A5	14	SPX10	0.303382	0.000797707
A5	15	SPX10	0.306312	0.00352024
A5	16	SPX10	0.301422	-0.00157708
A5	17	SPX10	0.303433	0.000225967
A5	18	SPX10	0.304324	0.000909638
A5	19	SPX10	0.29976	-0.00386183
A5	20	SPX10	0.300702	-0.00312701
A5	21	SPX10	0.303052	-0.000985146
A5	22	SPX10	0.302635	-0.00160929
A5	23	SPX10	0.303994	-0.000458348
A5	24	SPX10	0.310047	0.0053878
A5	25	SPX10	0.315884	0.0110173
A5	26	SPX10	0.329221	0.0241464
A5	27	SPX10	0.355706	0.0504244
A5	28	SPX10	0.399975	0.0944855
A5	29	SPX10	0.484004	0.178307
A5	30	SPX10	0.619075	0.313171
A5	31	SPX10	0.822653	0.516541
A5	32	SPX10	1.06169	0.755369
A5	33	SPX10	1.29368	0.987157
A5	34	SPX10	1.51228	1.20555
A5	35	SPX10	1.66484	1.3579
A5	36	SPX10	1.80229	1.49514
A5	37	SPX10	1.90795	1.60059
A5	38	SPX10	2.00189	1.69432
A5	39	SPX10	2.06986	1.76209
A5	40	SPX10	2.12651	1.81853
A6	1	SPX10	0.362943	-0.00935984
A6	2	SPX10	0.369173	-0.00248673
A6	3	SPX10	0.372741	0.00172528
A6	4	SPX10	0.372307	0.00193513
A6	5	SPX10	0.368858	-0.000870276
A6	6	SPX10	0.370049	0.000964574
A6	7	SPX10	0.371415	0.00297469
A6	8	SPX10	0.370078	0.00228177
A6	9	SPX10	0.366077	-0.00107548
A6	10	SPX10	0.366296	-0.000212756
A6	11	SPX10	0.362824	-0.00304039
A6	12	SPX10	0.366118	0.00089767
A6	13	SPX10	0.362044	-0.00253281
A6	14	SPX10	0.363268	-0.000665203
A6	15	SPX10	0.36337	8.08489e-05
A6	16	SPX10	0.360899	-0.0017459
A6	17	SPX10	0.357884	-0.00411765
A6	18	SPX10	0.35898	-0.00237751
A6	19	SPX10	0.356524	-0.00418999
A6	20	SPX10	0.358077	-0.00199331
A6	21	SPX10	0.35859	-0.000835838
A6	22	SPX10	0.360585	0.00180239
A6	23	SPX10	0.361831	0.0036925
A6	24	SPX10	0.364797	0.00730228
A6	25	SPX10	0.367015	0.0101639
A6	26	SPX10	0.38402	0.0278133
A6	27	SPX10	0.407544	0.0519807
A6	28	SPX10	0.452294	0.0973749
A6	29	SPX10	0.52942	0.175144
A6	30	SPX10	0.668352	0.314721
A6	31	SPX10	0.850036	0.497049
A6	32	SPX10	1.07773	0.725391
A6	33	SPX10	1.28962	0.937922
A6	34	SPX10	1.48959	1.13853
A6	35	SPX10	1.62373	1.27332
A6	36	SPX10	1.75372	1.40395
A6	37	SPX10	1.85222	1.50309
A6	38	SPX10	1.93856	1.59008
A6	39	SPX10	1.99547	1.64763
A6	40	SPX10	2.03999	1.6928
A7	1	SPX11	0.464692	0.0383594
A7	2	SPX11	0.461016	0.0282975
A7	3	SPX11	0.461585	0.0224814
A7	4	SPX11	0.466314	0.0208237
A7	5	SPX11	0.466098	0.0142221
A7	6	SPX11	0.462633	0.00437173
A7	7	SPX11	0.458318	-0.00632933
A7	8	SPX11	0.464867	-0.00616672
A7	9	SPX11	0.462522	-0.0148976
A7	10	SPX11	0.46092	-0.0228847
A7	11	SPX11	0.460389	-0.0298015
A7	12	SPX11	0.45714	-0.039437
A7	13	SPX11	0.458455	-0.0445079
A7	14	SPX11	0.467889	-0.0414591
A7	15	SPX11	0.504224	-0.0115107
A7	16	SPX11	0.540094	0.0179734
A7	17	SPX11	0.576884	0.0483774
A7	18	SPX11	0.579853	0.0449609
A7	19	SPX11	0.580153	0.0388747
A7	20	SPX11	0.570124	0.0224607
A7	21	SPX11	0.577462	0.0234127
A7	22	SPX11	0.573219	0.0127838
A7	23	SPX11	0.576386	0.00956465
A7	24	SPX11	0.579903	0.006696
A7	25	SPX11	0.576133	-0.00345985
A7	26	SPX11	0.571763	-0.0142154
A7	27	SPX11	0.57347	-0.0188945
A7	28	SPX11	0.582264	-0.0164869
A7	29	SPX11	0.588185	-0.0169517
A7	30	SPX11	0.597552	-0.0139708
A7	31	SPX11	0.608588	-0.00932022
A7	32	SPX11	0.631201	0.00690708
A7	33	SPX11	0.665486	0.0348059
A7	34	SPX11	0.717292	0.080226
A7	35	SPX11	0.786134	0.142682
A7	36	SPX11	0.865199	0.215362
A7	37	SPX11	0.943376	0.287153
A7	38	SPX11	1.0305	0.367887
A7	39	SPX11	1.11862	0.44962
A7	40	SPX11	1.22925	0.55387
A8	1	SPX11	0.501291	-0.00190266
A8	2	SPX11	0.505798	0.00300671
A8	3	SPX11	0.501714	-0.000676044
A8	4	SPX11	0.506465	0.00447675
A8	5	SPX11	0.505656	0.00406885
A8	6	SPX11	0.505413	0.00422797
A8	7	SPX11	0.504482	0.00369824
A8	8	SPX11	0.503835	0.00345312
A8	9	SPX11	0.498912	-0.00106884
A8	10	SPX11	0.497173	-0.00240648
A8	11	SPX11	0.495764	-0.0034138
A8	12	SPX11	0.498541	-0.000234987
A8	13	SPX11	0.495183	-0.00319158
A8	14	SPX11	0.493521	-0.00445144
A8	15	SPX11	0.495668	-0.00190307
A8	16	SPX11	0.499211	0.00204151
A8	17	SPX11	0.495737	-0.00103107
A8	18	SPX11	0.492508	-0.00385853
A8	19	SPX11	0.49104	-0.00492486
A8	20	SPX11	0.492982	-0.00258093
A8	21	SPX11	0.493493	-0.00166811
A8	22	SPX11	0.491438	-0.00332172
A8	23	SPX11	0.492833	-0.00152487
A8	24	SPX11	0.487981	-0.00597593
A8	25	SPX11	0.493341	-0.000213945
A8	26	SPX11	0.492793	-0.000360717
A8	27	SPX11	0.495087	0.00233467
A8	28	SPX11	0.499907	0.00755697
A8	29	SPX11	0.502898	0.0109488
A8	30	SPX11	0.512675	0.0211282
A8	31	SPX11	0.525977	0.0348315
A8	32	SPX11	0.553169	0.0624254
A8	33	SPX11	0.580567	0.090225
A8	34	SPX11	0.632173	0.142232
A8	35	SPX11	0.686501	0.196961
A8	36	SPX11	0.763263	0.274126
A8	37	SPX11	0.838318	0.349582
A8	38	SPX11	0.913835	0.4255
A8	39	SPX11	0.996018	0.508085
A8	40	SPX11	1.09489	0.60736
A9	1	SPX11	0.385637	-0.00605051
A9	2	SPX11	0.392559	0.0012749
A9	3	SPX11	0.392605	0.00172394
A9	4	SPX11	0.394964	0.00448689
A9	5	SPX11	0.388931	-0.00114306
A9	6	SPX11	0.391755	0.00208373
A9	7	SPX11	0.390889	0.00162147
A9	8	SPX11	0.386812	-0.00205222
A9	9	SPX11	0.391421	0.00295958
A9	10	SPX11	0.388486	0.000427642
A9	11	SPX11	0.387004	-0.000651137
A9	12	SPX11	0.38716	-9.11745e-05
A9	13	SPX11	0.388461	0.00161305
A9	14	SPX11	0.383359	-0.00308656
A9	15	SPX11	0.385748	-0.000294289
A9	16	SPX11	0.383464	-0.00217451
A9	17	SPX11	0.380962	-0.00427304
A9	18	SPX11	0.38405	-0.000781955
A9	19	SPX11	0.380703	-0.00372627
A9	20	SPX11	0.383758	-0.000267793
A9	21	SPX11	0.379021	-0.00460149
A9	22	SPX11	0.379747	-0.00347242
A9	23	SPX11	0.382741	-7.53412e-05
A9	24	SPX11	0.381733	-0.000679607
A9	25	SPX11	0.378021	-0.00398891
A9	26	SPX11	0.38124	-0.000366104
A9	27	SPX11	0.383927	0.00272399
A9	28	SPX11	0.385695	0.00489488
A9	29	SPX11	0.389587	0.00919071
A9	30	SPX11	0.396428	0.0164345
A9	31	SPX11	0.411853	0.0322633
A9	32	SPX11	0.428274	0.0490874
A9	33	SPX11	0.450297	0.0715137
A9	34	SPX11	0.485596	0.107216
A9	35	SPX11	0.513978	0.136001
A9	36	SPX11	0.561878	0.184304
A9	37	SPX11	0.608493	0.231322
A9	38	SPX11	0.661874	0.285107
A9	39	SPX11	0.715036	0.338671
A9	40	SPX11	0.790881	0.41492
A10	1	SPX12	0.254789	-0.000392409
A10	2	SPX12	0.255695	-0.000228324
A10	3	SPX12	0.255462	-0.0012043
A10	4	SPX12	0.25864	0.00123159
A10	5	SPX12	0.262661	0.00450969
A10	6	SPX12	0.259447	0.000553514
A10	7	SPX12	0.258742	-0.000893991
A10	8	SPX12	0.259818	-0.000560897
A10	9	SPX12	0.260371	-0.00074985
A10	10	SPX12	0.262283	0.000419885
A10	11	SPX12	0.262539	-6.63765e-05
A10	12	SPX12	0.259412	-0.00393672
A10	13	SPX12	0.261751	-0.00233962
A10	14	SPX12	0.2663	0.0014669
A10	15	SPX12	0.26524	-0.000335249
A10	16	SPX12	0.263815	-0.00250299
A10	17	SPX12	0.265504	-0.00155641
A10	18	SPX12	0.26983	0.00202674
A10	19	SPX12	0.268292	-0.000253766
A10	20	SPX12	0.27348	0.00419184
A10	21	SPX12	0.276183	0.00615205
A10	22	SPX12	0.287179	0.0164064
A10	23	SPX12	0.303658	0.032142
A10	24	SPX12	0.333916	0.0616579
A10	25	SPX12	0.381852	0.108852
A10	26	SPX12	0.467752	0.194009
A10	27	SPX12	0.578475	0.30399
A10	28	SPX12	0.732172	0.456944
A10	29	SPX12	0.911308	0.635337
A10	30	SPX12	1.07475	0.798042
A10	31	SPX12	1.22518	0.947726
A10	32	SPX12	1.36943	1.09123
A10	33	SPX12	1.50668	1.22774
A10	34	SPX12	1.64956	1.36988
A10	35	SPX12	1.75258	1.47216
A10	36	SPX12	1.86599	1.58482
A10	37	SPX12	1.94352	1.66161
A10	38	SPX12	2.01981	1.73716
A10	39	SPX12	2.07945	1.79605
A10	40	SPX12	2.1365	1.85236
A11	1	SPX12	0.243249	0.000958734
A11	2	SPX12	0.246848	0.00398085
A11	3	SPX12	0.245479	0.00203481
A11	4	SPX12	0.243921	-0.000100845
A11	5	SPX12	0.242449	-0.00214955
A11	6	SPX12	0.246622	0.00144659
A11	7	SPX12	0.246547	0.000794802
A11	8	SPX12	0.246801	0.000471982
A11	9	SPX12	0.248126	0.00121921
A11	10	SPX12	0.249982	0.00249836
A11	11	SPX12	0.246484	-0.00157663
A11	12	SPX12	0.247661	-0.000976683
A11	13	SPX12	0.247229	-0.00198534
A11	14	SPX12	0.250034	0.000242469
A11	15	SPX12	0.248909	-0.00145954
A11	16	SPX12	0.248685	-0.00226045
A11	17	SPX12	0.247701	-0.00382154
A11	18	SPX12	0.251288	-0.000811583
A11	19	SPX12	0.250124	-0.00255269
A11	20	SPX12	0.253287	3.39374e-05
A11	21	SPX12	0.262783	0.0089527
A11	22	SPX12	0.268399	0.0139919
A11	23	SPX12	0.284227	0.0292428
A11	24	SPX12	0.310294	0.0547323
A11	25	SPX12	0.354602	0.0984636
A11	26	SPX12	0.434381	0.177665
A11	27	SPX12	0.539304	0.282011
A11	28	SPX12	0.695535	0.437665
A11	29	SPX12	0.878442	0.619996
A11	30	SPX12	1.05329	0.79427
A11	31	SPX12	1.21011	0.950506
A11	32	SPX12	1.37356	1.11338
A11	33	SPX12	1.51932	1.25857
A11	34	SPX12	1.67548	1.41415
A11	35	SPX12	1.78403	1.52212
A11	36	SPX12	1.89814	1.63566
A11	37	SPX12	1.99127	1.72821
A11	38	SPX12	2.06631	1.80267
A11	39	SPX12	2.1422	1.87798
A11	40	SPX12	2.21628	1.95149
A12	1	SPX12	0.257248	0.00434344
A12	2	SPX12	0.256404	0.00267536
A12	3	SPX12	0.257876	0.00332334
A12	4	SPX12	0.255739	0.000362322
A12	5	SPX12	0.259878	0.00367824
A12	6	SPX12	0.254864	-0.00216023
A12	7	SPX12	0.257369	-0.0004793
A12	8	SPX12	0.26041	0.00173819
A12	9	SPX12	0.258535	-0.000961732
A12	10	SPX12	0.259317	-0.00100329
A12	11	SPX12	0.260563	-0.000581537
A12	12	SPX12	0.261373	-0.000595347
A12	13	SPX12	0.260547	-0.00224513
A12	14	SPX12	0.262367	-0.00124908
A12	15	SPX12	0.260866	-0.00357388
A12	16	SPX12	0.263212	-0.00205264
A12	17	SPX12	0.26272	-0.00336815
A12	18	SPX12	0.265586	-0.00132593
A12	19	SPX12	0.266501	-0.00123561
A12	20	SPX12	0.272329	0.00376884
A12	21	SPX12	0.277345	0.00796092
A12	22	SPX12	0.285532	0.015324
A12	23	SPX12	0.298327	0.0272948
A12	24	SPX12	0.330057	0.0582008
A12	25	SPX12	0.369239	0.0965586
A12	26	SPX12	0.452056	0.178551
A12	27	SPX12	0.560969	0.286641
A12	28	SPX12	0.713805	0.438652
A12	29	SPX12	0.899789	0.623813
A12	30	SPX12	1.06739	0.79059
A12	31	SPX12	1.23293	0.955307
A12	32	SPX12	1.37853	1.10008
A12	33	SPX12	1.52737	1.24809
A12	34	SPX12	1.67825	1.39816
A12	35	SPX12	1.79133	1.51041
A12	36	SPX12	1.90143	1.61969
A12	37	SPX12	2.00082	1.71826
A12	38	SPX12	2.07933	1.79594
A12	39	SPX12	2.14559	1.86137
A12	40	SPX12	2.20155	1.91651
B1	1	SPX9	0.313523	-0.0049938
B1	2	SPX9	0.315552	-0.00305158
B1	3	SPX9	0.318727	3.62756e-05
B1	4	SPX9	0.322822	0.00404427
B1	5	SPX9	0.319254	0.000388726
B1	6	SPX9	0.318932	-2.01278e-05
B1	7	SPX9	0.320532	0.00149294
B1	8	SPX9	0.317286	-0.00184065
B1	9	SPX9	0.318643	-0.000570713
B1	10	SPX9	0.321102	0.00180108
B1	11	SPX9	0.321566	0.00217722
B1	12	SPX9	0.319458	-1.70332e-05
B1	13	SPX9	0.317835	-0.00172741
B1	14	SPX9	0.317352	-0.00229774
B1	15	SPX9	0.317318	-0.00241954
B1	16	SPX9	0.31744	-0.0023841
B1	17	SPX9	0.319046	-0.000865842
B1	18	SPX9	0.322124	0.00212572
B1	19	SPX9	0.314956	-0.00512947
B1	20	SPX9	0.319297	-0.000876559
B1	21	SPX9	0.318109	-0.00215168
B1	22	SPX9	0.315138	-0.00520927
B1	23	SPX9	0.320713	0.00027883
B1	24	SPX9	0.326215	0.00569335
B1	25	SPX9	0.328081	0.00747172
B1	26	SPX9	0.332106	0.0114097
B1	27	SPX9	0.352017	0.031234
B1	28	SPX9	0.389484	0.068613
B1	29	SPX9	0.446473	0.125515
B1	30	SPX9	0.541926	0.220881
B1	31	SPX9	0.689578	0.368446
B1	32	SPX9	0.900131	0.578911
B1	33	SPX9	1.11817	0.796864
B1	34	SPX9	1.33697	1.01558
B1	35	SPX9	1.49095	1.16946
B1	36	SPX9	1.65202	1.33045
B1	37	SPX9	1.79353	1.47188
B1	38	SPX9	1.90986	1.58812
B1	39	SPX9	2.00208	1.68025
B1	40	SPX9	2.08539	1.76347
B2	1	SPX9	0.383482	0.00341443
B2	2	SPX9	0.381676	0.00184761
B2	3	SPX9	0.382278	0.0026889
B2	4	SPX9	0.382044	0.002694
B2	5	SPX9	0.380779	0.00166773
B2	6	SPX9	0.379499	0.000627358
B2	7	SPX9	0.37569	-0.00294296
B2	8	SPX9	0.377821	-0.000572778
B2	9	SPX9	0.382253	0.00409904
B2	10	SPX9	0.376684	-0.00123114
B2	11	SPX9	0.376952	-0.000724199
B2	12	SPX9	0.377328	-0.000109047
B2	13	SPX9	0.378796	0.00159851
B2	14	SPX9	0.373212	-0.003746
B2	15	SPX9	0.377445	0.00072587
B2	16	SPX9	0.372153	-0.00432687
B2	17	SPX9	0.374011	-0.0022295
B2	18	SPX9	0.372793	-0.00320887
B2	19	SPX9	0.372486	-0.00327672
B2	20	SPX9	0.374832	-0.000691133
B2	21	SPX9	0.369948	-0.0053363
B2	22	SPX9	0.376698	0.00165279
B2	23	SPX9	0.37154	-0.00326623
B2	24	SPX9	0.380753	0.00618582
B2	25	SPX9	0.384049	0.00972175
B2	26	SPX9	0.392682	0.0185935
B2	27	SPX9	0.412409	0.0385602
B2	28	SPX9	0.4514	0.0777896
B2	29	SPX9	0.517118	0.143747
B2	30	SPX9	0.621132	0.248
B2	31	SPX9	0.784602	0.411709
B2	32	SPX9	1.01267	0.640021
B2	33	SPX9	1.24188	0.869465
B2	34	SPX9	1.46656	1.09439
B2	35	SPX9	1.62773	1.2558
B2	36	SPX9	1.79296	1.42126
B2	37	SPX9	1.92676	1.5553
B2	38	SPX9	2.0456	1.67439
B2	39	SPX9	2.13707	1.76609
B2	40	SPX9	2.21807	1.84733
B3	1	SPX9	0.306201	0.000670383
B3	2	SPX9	0.313647	0.00790803
B3	3	SPX9	0.308224	0.00227625
B3	4	SPX9	0.30807	0.0019141
B3	5	SPX9	0.306663	0.000298754
B3	6	SPX9	0.304977	-0.00159646
B3	7	SPX9	0.309564	0.00278218
B3	8	SPX9	0.305128	-0.00186167
B3	9	SPX9	0.304042	-0.00315581
B3	10	SPX9	0.307561	0.000154131
B3	11	SPX9	0.308404	0.00078916
B3	12	SPX9	0.309191	0.00136715
B3	13	SPX9	0.310087	0.00205564
B3	14	SPX9	0.308898	0.000657676
B3	15	SPX9	0.306711	-0.00173768
B3	16	SPX9	0.306437	-0.00222012
B3	17	SPX9	0.307564	-0.00130137
B3	18	SPX9	0.304598	-0.00447556
B3	19	SPX9	0.310772	0.00148985
B3	20	SPX9	0.309157	-0.000333183
B3	21	SPX9	0.305194	-0.00450509
B3	22	SPX9	0.306199	-0.00370835
B3	23	SPX9	0.310725	0.000609231
B3	24	SPX9	0.313187	0.00286241
B3	25	SPX9	0.318171	0.00763877
B3	26	SPX9	0.326191	0.0154501
B3	27	SPX9	0.337537	0.0265874
B3	28	SPX9	0.371616	0.0604584
B3	29	SPX9	0.43396	0.122593
B3	30	SPX9	0.528041	0.216467
B3	31	SPX9	0.683889	0.372106
B3	32	SPX9	0.901503	0.589512
B3	33	SPX9	1.1406	0.828398
B3	34	SPX9	1.38617	1.07376
B3	35	SPX9	1.5611	1.24849
B3	36	SPX9	1.74758	1.43476
B3	37	SPX9	1.8841	1.57107
B3	38	SPX9	2.021	1.70776
B3	39	SPX9	2.1188	1.80535
B3	40	SPX9	2.20578	1.89213
B4	1	SPX10	0.27054	-0.00290306
B4	2	SPX10	0.275812	0.00201593
B4	3	SPX10	0.269921	-0.0042282
B4	4	SPX10	0.275317	0.000815214
B4	5	SPX10	0.276814	0.00195962
B4	6	SPX10	0.275479	0.000272265
B4	7	SPX10	0.274906	-0.000653758
B4	8	SPX10	0.27583	-8.24233e-05
B4	9	SPX10	0.277367	0.00110168
B4	10	SPX10	0.276663	4.55374e-05
B4	11	SPX10	0.280306	0.00333616
B4	12	SPX10	0.276226	-0.00109677
B4	13	SPX10	0.275261	-0.0024149
B4	14	SPX10	0.279188	0.00115932
B4	15	SPX10	0.278913	0.000531468
B4	16	SPX10	0.279803	0.00106963
B4	17	SPX10	0.278115	-0.000971563
B4	18	SPX10	0.282	0.00256045
B4	19	SPX10	0.280723	0.000930768
B4	20	SPX10	0.27681	-0.00333404
B4	21	SPX10	0.279352	-0.00114506
B4	22	SPX10	0.28131	0.000460501
B4	23	SPX10	0.280883	-0.000319311
B4	24	SPX10	0.281559	3.41278e-06
B4	25	SPX10	0.286598	0.00468973
B4	26	SPX10	0.298269	0.0160082
B4	27	SPX10	0.316003	0.0333899
B4	28	SPX10	0.35052	0.0675541
B4	29	SPX10	0.421236	0.137917
B4	30	SPX10	0.529486	0.245814
B4	31	SPX10	0.718034	0.434009
B4	32	SPX10	0.960889	0.676512
B4	33	SPX10	1.2299	0.945172
B4	34	SPX10	1.48214	1.19705
B4	35	SPX10	1.64313	1.35769
B4	36	SPX10	1.80532	1.51953
B4	37	SPX10	1.92934	1.6432
B4	38	SPX10	2.02135	1.73486
B4	39	SPX10	2.09117	1.80432
B4	40	SPX10	2.15215	1.86495
B5	1	SPX10	0.232692	-0.00135533
B5	2	SPX10	0.235836	0.00144216
B5	3	SPX10	0.234254	-0.000486045
B5	4	SPX10	0.237603	0.0025165
B5	5	SPX10	0.236728	0.00129507
B5	6	SPX10	0.237661	0.00188132
B5	7	SPX10	0.235848	-0.000278335
B5	8	SPX10	0.240658	0.00418481
B5	9	SPX10	0.236723	-9.65618e-05
B5	10	SPX10	0.237043	-0.00012335
B5	11	SPX10	0.237851	0.000338516
B5	12	SPX10	0.237666	-0.00019357
B5	13	SPX10	0.236138	-0.00206782
B5	14	SPX10	0.238145	-0.000407021
B5	15	SPX10	0.23521	-0.0036891
B5	16	SPX10	0.235618	-0.00362802
B5	17	SPX10	0.237015	-0.00257681
B5	18	SPX10	0.23834	-0.0015991
B5	19	SPX10	0.237613	-0.00267181
B5	20	SPX10	0.240896	0.000264482
B5	21	SPX10	0.239757	-0.00122135
B5	22	SPX10	0.240253	-0.00107179
B5	23	SPX10	0.239504	-0.00216717
B5	24	SPX10	0.24189	-0.000128072
B5	25	SPX10	0.243445	0.0010801
B5	26	SPX10	0.253556	0.0108451
B5	27	SPX10	0.260171	0.0171136
B5	28	SPX10	0.279343	0.0359389
B5	29	SPX10	0.321865	0.0781137
B5	30	SPX10	0.387791	0.143693
B5	31	SPX10	0.500561	0.256116
B5	32	SPX10	0.682827	0.438037
B5	33	SPX10	0.91355	0.668413
B5	34	SPX10	1.16766	0.922174
B5	35	SPX10	1.35465	1.10881
B5	36	SPX10	1.52919	1.28302
B5	37	SPX10	1.66897	1.42245
B5	38	SPX10	1.77371	1.52684
B5	39	SPX10	1.85572	1.6085
B5	40	SPX10	1.92527	1.67771
B6	1	SPX10	0.217258	-0.004605
B6	2	SPX10	0.222342	0.000383351
B6	3	SPX10	0.223398	0.00134517
B6	4	SPX10	0.22282	0.000671444
B6	5	SPX10	0.220235	-0.00200835
B6	6	SPX10	0.224251	0.00191195
B6	7	SPX10	0.221552	-0.000881377
B6	8	SPX10	0.223043	0.00051445
B6	9	SPX10	0.223746	0.00112177
B6	10	SPX10	0.219589	-0.00312995
B6	11	SPX10	0.22392	0.00110602
B6	12	SPX10	0.221588	-0.00132115
B6	13	SPX10	0.222493	-0.000511114
B6	14	SPX10	0.222263	-0.000836864
B6	15	SPX10	0.225217	0.00202264
B6	16	SPX10	0.223401	0.000111739
B6	17	SPX10	0.224758	0.00137292
B6	18	SPX10	0.222509	-0.000971105
B6	19	SPX10	0.222585	-0.000990337
B6	20	SPX10	0.221392	-0.00227785
B6	21	SPX10	0.225239	0.00147397
B6	22	SPX10	0.222905	-0.00095541
B6	23	SPX10	0.223903	-5.20073e-05
B6	24	SPX10	0.226334	0.00228344
B6	25	SPX10	0.229841	0.0056949
B6	26	SPX10	0.24044	0.0161991
B6	27	SPX10	0.257532	0.0331965
B6	28	SPX10	0.290361	0.06593
B6	29	SPX10	0.349744	0.125218
B6	30	SPX10	0.451484	0.226863
B6	31	SPX10	0.618655	0.393939
B6	32	SPX10	0.836488	0.611677
B6	33	SPX10	1.07265	0.847741
B6	34	SPX10	1.30228	1.07728
B6	35	SPX10	1.47281	1.24772
B6	36	SPX10	1.64541	1.42022
B6	37	SPX10	1.7844	1.55911
B6	38	SPX10	1.89548	1.6701
B6	39	SPX10	1.98754	1.76206
B6	40	SPX10	2.05604	1.83047
B7	1	SPX11	0.255085	-0.00246242
B7	2	SPX11	0.260165	0.00257357
B7	3	SPX11	0.258433	0.000797792
B7	4	SPX11	0.259874	0.00219504
B7	5	SPX11	0.259548	0.00182558
B7	6	SPX11	0.259376	0.00161001
B7	7	SPX11	0.256146	-0.0016639
B7	8	SPX11	0.260543	0.00268944
B7	9	SPX11	0.258195	0.000297087
B7	10	SPX11	0.25963	0.00168894
B7	11	SPX11	0.260367	0.00238223
B7	12	SPX11	0.258525	0.0004966
B7	13	SPX11	0.25555	-0.0025222
B7	14	SPX11	0.25817	5.41159e-05
B7	15	SPX11	0.258339	0.000178864
B7	16	SPX11	0.255265	-0.00293888
B7	17	SPX11	0.257549	-0.000698794
B7	18	SPX11	0.256125	-0.00216665
B7	19	SPX11	0.255623	-0.00271156
B7	20	SPX11	0.258427	4.82479e-05
B7	21	SPX11	0.257049	-0.0013738
B7	22	SPX11	0.255932	-0.00253467
B7	23	SPX11	0.257135	-0.00137545
B7	24	SPX11	0.252404	-0.00615003
B7	25	SPX11	0.256351	-0.0022462
B7	26	SPX11	0.253438	-0.00520283
B7	27	SPX11	0.255945	-0.00273961
B7	28	SPX11	0.257621	-0.00110785
B7	29	SPX11	0.260537	0.00176458
B7	30	SPX11	0.264996	0.00617988
B7	31	SPX11	0.272084	0.013224
B7	32	SPX11	0.280318	0.0214142
B7	33	SPX11	0.293566	0.0346182
B7	34	SPX11	0.310915	0.0519234
B7	35	SPX11	0.330202	0.071167
B7	36	SPX11	0.354345	0.0952664
B7	37	SPX11	0.38764	0.128517
B7	38	SPX11	0.420062	0.160895
B7	39	SPX11	0.45274	0.19353
B7	40	SPX11	0.501326	0.242073
B8	1	SPX11	0.314873	-0.00142688
B8	2	SPX11	0.316927	0.000201275
B8	3	SPX11	0.317545	0.000393171
B8	4	SPX11	0.317834	0.000256942
B8	5	SPX11	0.317699	-0.00030385
B8	6	SPX11	0.318456	2.71029e-05
B8	7	SPX11	0.319149	0.000294696
B8	8	SPX11	0.319928	0.000647613
B8	9	SPX11	0.321413	0.00170711
B8	10	SPX11	0.319468	-0.000663752
B8	11	SPX11	0.321171	0.000613603
B8	12	SPX11	0.321776	0.000792862
B8	13	SPX11	0.321239	-0.000169397
B8	14	SPX11	0.32462	0.00278571
B8	15	SPX11	0.322235	-2.50685e-05
B8	16	SPX11	0.321085	-0.00160057
B8	17	SPX11	0.321914	-0.00119702
B8	18	SPX11	0.323651	0.000113983
B8	19	SPX11	0.320344	-0.00361849
B8	20	SPX11	0.323585	-0.000803723
B8	21	SPX11	0.325877	0.00106285
B8	22	SPX11	0.324176	-0.00106381
B8	23	SPX11	0.320888	-0.0047773
B8	24	SPX11	0.322169	-0.00392257
B8	25	SPX11	0.32465	-0.00186708
B8	26	SPX11	0.32779	0.000847254
B8	27	SPX11	0.331543	0.00417465
B8	28	SPX11	0.334089	0.00629508
B8	29	SPX11	0.338403	0.0101831
B8	30	SPX11	0.35514	0.0264942
B8	31	SPX11	0.372493	0.0434217
B8	32	SPX11	0.395318	0.0658207
B8	33	SPX11	0.43833	0.108407
B8	34	SPX11	0.502725	0.172377
B8	35	SPX11	0.578665	0.247891
B8	36	SPX11	0.680458	0.349258
B8	37	SPX11	0.781776	0.450151
B8	38	SPX11	0.887909	0.555858
B8	39	SPX11	0.979191	0.646715
B8	40	SPX11	1.10228	0.769376
B9	1	SPX11	0.332229	0.00141734
B9	2	SPX11	0.332151	0.00138794
B9	3	SPX11	0.331494	0.000778708
B9	4	SPX11	0.335788	0.0051206
B9	5	SPX11	0.334117	0.00349746
B9	6	SPX11	0.330803	0.00023195
B9	7	SPX11	0.329806	-0.000717027
B9	8	SPX11	0.332009	0.00153435
B9	9	SPX11	0.330263	-0.000163651
B9	10	SPX11	0.331258	0.000879269
B9	11	SPX11	0.331663	0.00133261
B9	12	SPX11	0.330302	1.95387e-05
B9	13	SPX11	0.329606	-0.000628346
B9	14	SPX11	0.329225	-0.000961219
B9	15	SPX11	0.329586	-0.000552373
B9	16	SPX11	0.328687	-0.00140282
B9	17	SPX11	0.325766	-0.00427632
B9	18	SPX11	0.329335	-0.000659368
B9	19	SPX11	0.32895	-0.000996146
B9	20	SPX11	0.326858	-0.00303949
B9	21	SPX11	0.326663	-0.00318649
B9	22	SPX11	0.324713	-0.00508825
B9	23	SPX11	0.325651	-0.00410225
B9	24	SPX11	0.325881	-0.00382406
B9	25	SPX11	0.326669	-0.00298826
B9	26	SPX11	0.326588	-0.00302141
B9	27	SPX11	0.326877	-0.00268388
B9	28	SPX11	0.331217	0.00170402
B9	29	SPX11	0.336776	0.00731066
B9	30	SPX11	0.345299	0.0158822
B9	31	SPX11	0.350703	0.0213338
B9	32	SPX11	0.366209	0.0368887
B9	33	SPX11	0.387682	0.0584096
B9	34	SPX11	0.420287	0.0910627
B9	35	SPX11	0.444599	0.115423
B9	36	SPX11	0.49001	0.160882
B9	37	SPX11	0.535688	0.206607
B9	38	SPX11	0.582882	0.25385
B9	39	SPX11	0.629833	0.300849
B9	40	SPX11	0.699631	0.370695
B10	1	SPX12	0.323583	0.00152696
B10	2	SPX12	0.324357	0.00276127
B10	3	SPX12	0.324314	0.0031778
B10	4	SPX12	0.322291	0.00161519
B10	5	SPX12	0.321123	0.000907247
B10	6	SPX12	0.319201	-0.00055517
B10	7	SPX12	0.317453	-0.00184268
B10	8	SPX12	0.318851	1.47966e-05
B10	9	SPX12	0.319847	0.00147089
B10	10	SPX12	0.314852	-0.00306411
B10	11	SPX12	0.314652	-0.00280342
B10	12	SPX12	0.314487	-0.00250818
B10	13	SPX12	0.316097	-0.000438609
B10	14	SPX12	0.316932	0.000856852
B10	15	SPX12	0.315563	-5.29403e-05
B10	16	SPX12	0.313215	-0.00194031
B10	17	SPX12	0.315061	0.000365273
B10	18	SPX12	0.3134	-0.00083542
B10	19	SPX12	0.318138	0.00436301
B10	20	SPX12	0.314585	0.00126978
B10	21	SPX12	0.316562	0.00370715
B10	22	SPX12	0.326896	0.0145006
B10	23	SPX12	0.338322	0.026387
B10	24	SPX12	0.361992	0.050517
B10	25	SPX12	0.397799	0.0867837
B10	26	SPX12	0.466361	0.155806
B10	27	SPX12	0.553834	0.243739
B10	28	SPX12	0.68504	0.375405
B10	29	SPX12	0.829895	0.52072
B10	30	SPX12	0.975851	0.667136
B10	31	SPX12	1.10619	0.797938
B10	32	SPX12	1.24511	0.937319
B10	33	SPX12	1.38285	1.07552
B10	34	SPX12	1.52455	1.21767
B10	35	SPX12	1.63468	1.32827
B10	36	SPX12	1.75901	1.45306
B10	37	SPX12	1.8535	1.54801
B10	38	SPX12	1.93543	1.63039
B10	39	SPX12	2.01452	1.70995
B10	40	SPX12	2.07856	1.77445
B11	1	SPX12	0.304572	-0.000394048
B11	2	SPX12	0.305041	6.61569e-05
B11	3	SPX12	0.307073	0.00209
B11	4	SPX12	0.307307	0.00231581
B11	5	SPX12	0.305817	0.000818093
B11	6	SPX12	0.306441	0.00143422
B11	7	SPX12	0.306706	0.00169025
B11	8	SPX12	0.304827	-0.000196057
B11	9	SPX12	0.303876	-0.00115563
B11	10	SPX12	0.30424	-0.000799648
B11	11	SPX12	0.303087	-0.00196081
B11	12	SPX12	0.303842	-0.00121396
B11	13	SPX12	0.304467	-0.000597624
B11	14	SPX12	0.301219	-0.00385344
B11	15	SPX12	0.303153	-0.00192768
B11	16	SPX12	0.304115	-0.000973617
B11	17	SPX12	0.301888	-0.00320906
B11	18	SPX12	0.302161	-0.00294424
B11	19	SPX12	0.302784	-0.00232984
B11	20	SPX12	0.306815	0.00169395
B11	21	SPX12	0.309564	0.00443421
B11	22	SPX12	0.311823	0.00668506
B11	23	SPX12	0.321376	0.0162296
B11	24	SPX12	0.339096	0.0339414
B11	25	SPX12	0.363433	0.0582706
B11	26	SPX12	0.414888	0.109717
B11	27	SPX12	0.482887	0.177708
B11	28	SPX12	0.602898	0.297711
B11	29	SPX12	0.761255	0.45606
B11	30	SPX12	0.934645	0.629442
B11	31	SPX12	1.1038	0.79859
B11	32	SPX12	1.26126	0.956044
B11	33	SPX12	1.41516	1.10993
B11	34	SPX12	1.56936	1.26413
B11	35	SPX12	1.69136	1.38612
B11	36	SPX12	1.82801	1.52276
B11	37	SPX12	1.92933	1.62407
B11	38	SPX12	2.02645	1.72119
B11	39	SPX12	2.10853	1.80326
B11	40	SPX12	2.17687	1.87159
B12	1	SPX12	0.308529	0.000696536
B12	2	SPX12	0.309056	0.000771114
B12	3	SPX12	0.310407	0.00166925
B12	4	SPX12	0.309855	0.000664538
B12	5	SPX12	0.308761	-0.00088213
B12	6	SPX12	0.310194	9.8707e-05
B12	7	SPX12	0.31412	0.00357227
B12	8	SPX12	0.311453	0.000453142
B12	9	SPX12	0.309739	-0.00171371
B12	10	SPX12	0.313478	0.00157281
B12	11	SPX12	0.311594	-0.000764333
B12	12	SPX12	0.309101	-0.00370962
B12	13	SPX12	0.309511	-0.00375217
B12	14	SPX12	0.315147	0.0014319
B12	15	SPX12	0.314527	0.000359565
B12	16	SPX12	0.314135	-0.000485586
B12	17	SPX12	0.315686	0.000613268
B12	18	SPX12	0.312514	-0.00301166
B12	19	SPX12	0.314574	-0.00140364
B12	20	SPX12	0.312837	-0.00359317
B12	21	SPX12	0.318691	0.0018083
B12	22	SPX12	0.324408	0.00707227
B12	23	SPX12	0.333478	0.0156901
B12	24	SPX12	0.346382	0.0281411
B12	25	SPX12	0.372333	0.0536396
B12	26	SPX12	0.422564	0.103419
B12	27	SPX12	0.490491	0.170893
B12	28	SPX12	0.605037	0.284987
B12	29	SPX12	0.7629	0.442397
B12	30	SPX12	0.935684	0.614729
B12	31	SPX12	1.09934	0.777934
B12	32	SPX12	1.25912	0.937255
B12	33	SPX12	1.40436	1.08205
B12	34	SPX12	1.55466	1.2319
B12	35	SPX12	1.67786	1.35464
B12	36	SPX12	1.81255	1.48888
B12	37	SPX12	1.91042	1.5863
B12	38	SPX12	2.0098	1.68523
B12	39	SPX12	2.0786	1.75357
B12	40	SPX12	2.15036	1.82488
C1	1	SPX9	0.350483	-0.00260954
C1	2	SPX9	0.353325	0.000486333
C1	3	SPX9	0.355427	0.00284287
C1	4	SPX9	0.355741	0.00341193
C1	5	SPX9	0.358837	0.00676205
C1	6	SPX9	0.351446	-0.00037455
C1	7	SPX9	0.351096	-0.00046928
C1	8	SPX9	0.349958	-0.00135359
C1	9	SPX9	0.349299	-0.00175767
C1	10	SPX9	0.35118	0.000377736
C1	11	SPX9	0.348819	-0.00172862
C1	12	SPX9	0.350209	-8.4326e-05
C1	13	SPX9	0.349875	-0.00016338
C1	14	SPX9	0.345415	-0.00436925
C1	15	SPX9	0.345617	-0.00391234
C1	16	SPX9	0.34617	-0.00310519
C1	17	SPX9	0.348519	-0.000501859
C1	18	SPX9	0.347055	-0.00171105
C1	19	SPX9	0.344743	-0.00376886
C1	20	SPX9	0.34457	-0.00368686
C1	21	SPX9	0.345097	-0.0029062
C1	22	SPX9	0.346863	-0.000885804
C1	23	SPX9	0.348687	0.00119304
C1	24	SPX9	0.350161	0.00292164
C1	25	SPX9	0.360254	0.0132696
C1	26	SPX9	0.369694	0.0229641
C1	27	SPX9	0.395123	0.0486475
C1	28	SPX9	0.438786	0.0925647
C1	29	SPX9	0.52328	0.177313
C1	30	SPX9	0.654148	0.308436
C1	31	SPX9	0.829569	0.484111
C1	32	SPX9	1.04459	0.699391
C1	33	SPX9	1.23958	0.894628
C1	34	SPX9	1.43056	1.08586
C1	35	SPX9	1.58003	1.23559
C1	36	SPX9	1.73523	1.39104
C1	37	SPX9	1.85121	1.50728
C1	38	SPX9	1.95698	1.61331
C1	39	SPX9	2.03718	1.69376
C1	40	SPX9	2.11749	1.77432
C2	1	SPX9	0.301151	-0.00852619
C2	2	SPX9	0.310134	0.000675627
C2	3	SPX9	0.308574	-0.000664737
C2	4	SPX9	0.303297	-0.00572288
C2	5	SPX9	0.305057	-0.00374365
C2	6	SPX9	0.309465	0.00088342
C2	7	SPX9	0.305966	-0.00239693
C2	8	SPX9	0.308609	0.000465284
C2	9	SPX9	0.309622	0.00169692
C2	10	SPX9	0.307539	-0.000166833
C2	11	SPX9	0.309107	0.00161987
C2	12	SPX9	0.310888	0.00362073
C2	13	SPX9	0.309968	0.00291921
C2	14	SPX9	0.310944	0.00411443
C2	15	SPX9	0.309276	0.00266568
C2	16	SPX9	0.308059	0.00166759
C2	17	SPX9	0.310276	0.0041033
C2	18	SPX9	0.310311	0.00435712
C2	19	SPX9	0.305326	-0.000408781
C2	20	SPX9	0.305179	-0.000336694
C2	21	SPX9	0.297164	-0.00813245
C2	22	SPX9	0.301754	-0.00332334
C2	23	SPX9	0.303163	-0.00169563
C2	24	SPX9	0.303118	-0.00152162
C2	25	SPX9	0.310423	0.00600256
C2	26	SPX9	0.324935	0.0207333
C2	27	SPX9	0.346639	0.0426562
C2	28	SPX9	0.396184	0.0924207
C2	29	SPX9	0.472867	0.169323
C2	30	SPX9	0.592903	0.289577
C2	31	SPX9	0.767004	0.463898
C2	32	SPX9	0.98676	0.683873
C2	33	SPX9	1.1936	0.890934
C2	34	SPX9	1.40228	1.09984
C2	35	SPX9	1.55892	1.25669
C2	36	SPX9	1.70074	1.39873
C2	37	SPX9	1.82516	1.52336
C2	38	SPX9	1.93746	1.63589
C2	39	SPX9	2.01438	1.71303
C2	40	SPX9	2.08298	1.78184
C3	1	SPX9	0.340823	-0.00178879
C3	2	SPX9	0.346549	0.00396115
C3	3	SPX9	0.342182	-0.000381765
C3	4	SPX9	0.343459	0.000919673
C3	5	SPX9	0.343677	0.00116241
C3	6	SPX9	0.340241	-0.00224855
C3	7	SPX9	0.34247	4.71308e-06
C3	8	SPX9	0.341756	-0.000684942
C3	9	SPX9	0.343937	0.0015204
C3	10	SPX9	0.343151	0.000758475
C3	11	SPX9	0.343681	0.00131342
C3	12	SPX9	0.341911	-0.000433021
C3	13	SPX9	0.343048	0.000728644
C3	14	SPX9	0.343609	0.00131387
C3	15	SPX9	0.342094	-0.000175885
C3	16	SPX9	0.339087	-0.0031585
C3	17	SPX9	0.341259	-0.000962934
C3	18	SPX9	0.34273	0.000533262
C3	19	SPX9	0.337678	-0.00449475
C3	20	SPX9	0.342574	0.000426154
C3	21	SPX9	0.342591	0.000467043
C3	22	SPX9	0.340901	-0.00119843
C3	23	SPX9	0.346666	0.0045907
C3	24	SPX9	0.348146	0.00609575
C3	25	SPX9	0.359735	0.0177086
C3	26	SPX9	0.375689	0.0336876
C3	27	SPX9	0.41026	0.0682827
C3	28	SPX9	0.462855	0.120902
C3	29	SPX9	0.562742	0.220813
C3	30	SPX9	0.713045	0.371141
C3	31	SPX9	0.903909	0.562029
C3	32	SPX9	1.11864	0.776789
C3	33	SPX9	1.30295	0.961115
C3	34	SPX9	1.49453	1.15273
C3	35	SPX9	1.64273	1.30095
C3	36	SPX9	1.7937	1.45195
C3	37	SPX9	1.92464	1.58291
C3	38	SPX9	2.02321	1.6815
C3	39	SPX9	2.10715	1.76547
C3	40	SPX9	2.19504	1.85338
C4	1	SPX10	0.268855	-0.00282734
C4	2	SPX10	0.270534	-0.00143299
C4	3	SPX10	0.27261	0.000357429
C4	4	SPX10	0.273293	0.00075525
C4	5	SPX10	0.27214	-0.00068317
C4	6	SPX10	0.274036	0.000927396
C4	7	SPX10	0.272304	-0.00108934
C4	8	SPX10	0.27509	0.00141172
C4	9	SPX10	0.276293	0.00232977
C4	10	SPX10	0.275849	0.00160053
C4	11	SPX10	0.276594	0.00205977
C4	12	SPX10	0.275977	0.00115815
C4	13	SPX10	0.273444	-0.00166012
C4	14	SPX10	0.27292	-0.00246974
C4	15	SPX10	0.273448	-0.00222683
C4	16	SPX10	0.273961	-0.00199882
C4	17	SPX10	0.274127	-0.00211777
C4	18	SPX10	0.273458	-0.00307197
C4	19	SPX10	0.274181	-0.00263436
C4	20	SPX10	0.276776	-0.000325018
C4	21	SPX10	0.277273	-0.000112598
C4	22	SPX10	0.275623	-0.00204815
C4	23	SPX10	0.280688	0.00273136
C4	24	SPX10	0.285348	0.00710651
C4	25	SPX10	0.291301	0.0127741
C4	26	SPX10	0.31075	0.0319385
C4	27	SPX10	0.34384	0.0647432
C4	28	SPX10	0.40315	0.123768
C4	29	SPX10	0.514241	0.234573
C4	30	SPX10	0.688993	0.409041
C4	31	SPX10	0.951793	0.671555
C4	32	SPX10	1.23936	0.958841
C4	33	SPX10	1.50164	1.22083
C4	34	SPX10	1.73477	1.45368
C4	35	SPX10	1.89112	1.60974
C4	36	SPX10	2.04415	1.76249
C4	37	SPX10	2.14966	1.86771
C4	38	SPX10	2.23927	1.95704
C4	39	SPX10	2.30087	2.01835
C4	40	SPX10	2.35868	2.07588
C5	1	SPX10	0.285395	-0.00196389
C5	2	SPX10	0.28606	-0.00157507
C5	3	SPX10	0.290677	0.00276453
C5	4	SPX10	0.289068	0.000878878
C5	5	SPX10	0.289795	0.00132841
C5	6	SPX10	0.285717	-0.0030258
C5	7	SPX10	0.289871	0.000850466
C5	8	SPX10	0.289149	-0.000147945
C5	9	SPX10	0.290987	0.00141328
C5	10	SPX10	0.28738	-0.0024706
C5	11	SPX10	0.292632	0.00250415
C5	12	SPX10	0.288459	-0.00194602
C5	13	SPX10	0.290219	-0.000462675
C5	14	SPX10	0.288613	-0.00234514
C5	15	SPX10	0.289862	-0.00137332
C5	16	SPX10	0.289362	-0.0021509
C5	17	SPX10	0.293246	0.00145712
C5	18	SPX10	0.29256	0.000493276
C5	19	SPX10	0.292164	-0.00017877
C5	20	SPX10	0.292092	-0.000527997
C5	21	SPX10	0.290759	-0.00213828
C5	22	SPX10	0.292655	-0.000518646
C5	23	SPX10	0.294546	0.00109485
C5	24	SPX10	0.298229	0.00450113
C5	25	SPX10	0.307918	0.0139131
C5	26	SPX10	0.322893	0.0286111
C5	27	SPX10	0.350025	0.0554665
C5	28	SPX10	0.4109	0.116065
C5	29	SPX10	0.513261	0.218149
C5	30	SPX10	0.670094	0.374705
C5	31	SPX10	0.904495	0.608829
C5	32	SPX10	1.18113	0.885191
C5	33	SPX10	1.43544	1.13922
C5	34	SPX10	1.66497	1.36848
C5	35	SPX10	1.8211	1.52432
C5	36	SPX10	1.98071	1.68366
C5	37	SPX10	2.097	1.79968
C5	38	SPX10	2.19034	1.89273
C5	39	SPX10	2.24918	1.9513
C5	40	SPX10	2.32046	2.0223
C6	1	SPX10	0.249773	-0.00407011
C6	2	SPX10	0.253517	-0.000583871
C6	3	SPX10	0.254896	0.000536851
C6	4	SPX10	0.255114	0.000497011
C6	5	SPX10	0.256078	0.00120184
C6	6	SPX10	0.255202	6.78695e-05
C6	7	SPX10	0.256875	0.00148244
C6	8	SPX10	0.255698	4.72577e-05
C6	9	SPX10	0.253093	-0.00281608
C6	10	SPX10	0.256365	0.000197652
C6	11	SPX10	0.255501	-0.000924579
C6	12	SPX10	0.257962	0.00127847
C6	13	SPX10	0.257369	0.000426938
C6	14	SPX10	0.256188	-0.00101203
C6	15	SPX10	0.257313	-0.000145046
C6	16	SPX10	0.255912	-0.00180443
C6	17	SPX10	0.257208	-0.000766473
C6	18	SPX10	0.257311	-0.000922065
C6	19	SPX10	0.257286	-0.0012056
C6	20	SPX10	0.257201	-0.00154832
C6	21	SPX10	0.261069	0.00206075
C6	22	SPX10	0.258944	-0.00032236
C6	23	SPX10	0.263194	0.00366991
C6	24	SPX10	0.265049	0.00526594
C6	25	SPX10	0.275502	0.0154612
C6	26	SPX10	0.292597	0.0322973
C6	27	SPX10	0.321144	0.0605865
C6	28	SPX10	0.37772	0.116905
C6	29	SPX10	0.482429	0.221355
C6	30	SPX10	0.650592	0.38926
C6	31	SPX10	0.887823	0.626232
C6	32	SPX10	1.17786	0.916008
C6	33	SPX10	1.44605	1.18395
C6	34	SPX10	1.69116	1.4288
C6	35	SPX10	1.87051	1.60789
C6	36	SPX10	2.0322	1.76932
C6	37	SPX10	2.15142	1.88828
C6	38	SPX10	2.24496	1.98156
C6	39	SPX10	2.32093	2.05727
C6	40	SPX10	2.37544	2.11152
C7	1	SPX11	0.309236	-0.00615586
C7	2	SPX11	0.310627	-0.00428707
C7	3	SPX11	0.315932	0.00149656
C7	4	SPX11	0.316321	0.00236315
C7	5	SPX11	0.314519	0.00103872
C7	6	SPX11	0.313771	0.000768742
C7	7	SPX11	0.314499	0.00197491
C7	8	SPX11	0.314288	0.00224218
C7	9	SPX11	0.313059	0.00149069
C7	10	SPX11	0.312883	0.0017928
C7	11	SPX11	0.312102	0.00148897
C7	12	SPX11	0.309582	-0.00055257
C7	13	SPX11	0.306966	-0.00269055
C7	14	SPX11	0.308149	-0.00103017
C7	15	SPX11	0.306395	-0.00230579
C7	16	SPX11	0.307433	-0.000789833
C7	17	SPX11	0.304411	-0.00333441
C7	18	SPX11	0.305386	-0.00188151
C7	19	SPX11	0.303413	-0.00337636
C7	20	SPX11	0.303155	-0.00315671
C7	21	SPX11	0.303955	-0.00187807
C7	22	SPX11	0.301102	-0.00425366
C7	23	SPX11	0.302546	-0.00233129
C7	24	SPX11	0.29909	-0.00530967
C7	25	SPX11	0.300895	-0.00302692
C7	26	SPX11	0.303684	0.000240311
C7	27	SPX11	0.303686	0.000719806
C7	28	SPX11	0.309287	0.0067991
C7	29	SPX11	0.315512	0.0135016
C7	30	SPX11	0.323224	0.0216914
C7	31	SPX11	0.337847	0.0367932
C7	32	SPX11	0.359224	0.0586475
C7	33	SPX11	0.382034	0.0819354
C7	34	SPX11	0.421352	0.121732
C7	35	SPX11	0.455577	0.156435
C7	36	SPX11	0.501215	0.202551
C7	37	SPX11	0.548183	0.249996
C7	38	SPX11	0.604481	0.306772
C7	39	SPX11	0.661227	0.363996
C7	40	SPX11	0.743913	0.44716
C8	1	SPX11	0.309698	-0.00226813
C8	2	SPX11	0.311091	-0.00104674
C8	3	SPX11	0.312649	0.000339346
C8	4	SPX11	0.31333	0.000848287
C8	5	SPX11	0.314128	0.00147525
C8	6	SPX11	0.312117	-0.000708334
C8	7	SPX11	0.312253	-0.000743256
C8	8	SPX11	0.315427	0.0022585
C8	9	SPX11	0.315005	0.00166541
C8	10	SPX11	0.313354	-0.000157322
C8	11	SPX11	0.314103	0.000419658
C8	12	SPX11	0.315343	0.00148814
C8	13	SPX11	0.313605	-0.000421469
C8	14	SPX11	0.314104	-9.42922e-05
C8	15	SPX11	0.312073	-0.00229683
C8	16	SPX11	0.313788	-0.000753864
C8	17	SPX11	0.314006	-0.000707454
C8	18	SPX11	0.311607	-0.00327864
C8	19	SPX11	0.31173	-0.00332668
C8	20	SPX11	0.315281	5.26147e-05
C8	21	SPX11	0.315029	-0.000371346
C8	22	SPX11	0.314267	-0.00130552
C8	23	SPX11	0.31486	-0.000883903
C8	24	SPX11	0.31371	-0.00220539
C8	25	SPX11	0.316249	0.000161904
C8	26	SPX11	0.316372	0.000112916
C8	27	SPX11	0.319521	0.00309006
C8	28	SPX11	0.321945	0.00534222
C8	29	SPX11	0.331061	0.0142867
C8	30	SPX11	0.34252	0.0255736
C8	31	SPX11	0.360572	0.043454
C8	32	SPX11	0.386118	0.0688289
C8	33	SPX11	0.422334	0.104873
C8	34	SPX11	0.477182	0.15955
C8	35	SPX11	0.525273	0.207468
C8	36	SPX11	0.589243	0.271266
C8	37	SPX11	0.652187	0.334039
C8	38	SPX11	0.724197	0.405878
C8	39	SPX11	0.801526	0.483035
C8	40	SPX11	0.906904	0.588241
C9	1	SPX11	0.33574	0.00531601
C9	2	SPX11	0.33361	0.00292054
C9	3	SPX11	0.332346	0.00139177
C9	4	SPX11	0.332553	0.00133387
C9	5	SPX11	0.332886	0.00140081
C9	6	SPX11	0.331771	2.12698e-05
C9	7	SPX11	0.332599	0.000583734
C9	8	SPX11	0.334025	0.00174514
C9	9	SPX11	0.330452	-0.00209316
C9	10	SPX11	0.331596	-0.00121443
C9	11	SPX11	0.33118	-0.00189529
C9	12	SPX11	0.334282	0.000941
C9	13	SPX11	0.334518	0.000912246
C9	14	SPX11	0.333843	-2.77734e-05
C9	15	SPX11	0.334914	0.000777163
C9	16	SPX11	0.331109	-0.00329255
C9	17	SPX11	0.331905	-0.00276227
C9	18	SPX11	0.334303	-0.000628836
C9	19	SPX11	0.334724	-0.000473024
C9	20	SPX11	0.336133	0.000670317
C9	21	SPX11	0.332464	-0.00326385
C9	22	SPX11	0.333891	-0.00210135
C9	23	SPX11	0.335791	-0.000467192
C9	24	SPX11	0.337116	0.000592971
C9	25	SPX11	0.340328	0.00353956
C9	26	SPX11	0.341363	0.00430987
C9	27	SPX11	0.345479	0.00816033
C9	28	SPX11	0.358139	0.020555
C9	29	SPX11	0.370654	0.0328053
C9	30	SPX11	0.392779	0.0546646
C9	31	SPX11	0.427106	0.088727
C9	32	SPX11	0.479317	0.140672
C9	33	SPX11	0.548841	0.209931
C9	34	SPX11	0.64617	0.306996
C9	35	SPX11	0.738264	0.398824
C9	36	SPX11	0.846765	0.50706
C9	37	SPX11	0.942973	0.603003
C9	38	SPX11	1.05687	0.716633
C9	39	SPX11	1.16846	0.827954
C9	40	SPX11	1.29868	0.957915
C10	1	SPX12	0.26923	0.00116543
C10	2	SPX12	0.271572	0.00320381
C10	3	SPX12	0.270434	0.00176199
C10	4	SPX12	0.270557	0.00158194
C10	5	SPX12	0.271177	0.00189766
C10	6	SPX12	0.269659	7.69621e-05
C10	7	SPX12	0.270182	0.000296535
C10	8	SPX12	0.269885	-0.000304291
C10	9	SPX12	0.271495	0.00100179
C10	10	SPX12	0.268232	-0.00256509
C10	11	SPX12	0.272323	0.00122331
C10	12	SPX12	0.269267	-0.00213619
C10	13	SPX12	0.269501	-0.00220663
C10	14	SPX12	0.26893	-0.00308107
C10	15	SPX12	0.27033	-0.00198405
C10	16	SPX12	0.270397	-0.00222108
C10	17	SPX12	0.26866	-0.00426175
C10	18	SPX12	0.273445	0.000219527
C10	19	SPX12	0.274312	0.000783883
C10	20	SPX12	0.283749	0.00991656
C10	21	SPX12	0.290154	0.0160182
C10	22	SPX12	0.302645	0.0282061
C10	23	SPX12	0.333218	0.058475
C10	24	SPX12	0.376388	0.101341
C10	25	SPX12	0.451335	0.175985
C10	26	SPX12	0.563579	0.287925
C10	27	SPX12	0.684801	0.408844
C10	28	SPX12	0.826219	0.549959
C10	29	SPX12	0.964149	0.687585
C10	30	SPX12	1.09547	0.818599
C10	31	SPX12	1.22497	0.947798
C10	32	SPX12	1.35797	1.0805
C10	33	SPX12	1.48919	1.21141
C10	34	SPX12	1.62426	1.34617
C10	35	SPX12	1.7231	1.44472
C10	36	SPX12	1.82125	1.54256
C10	37	SPX12	1.89919	1.6202
C10	38	SPX12	1.97622	1.69693
C10	39	SPX12	2.03822	1.75862
C10	40	SPX12	2.08837	1.80846
C11	1	SPX12	0.237183	0.000650304
C11	2	SPX12	0.236544	-0.000588194
C11	3	SPX12	0.238348	0.000615101
C11	4	SPX12	0.239238	0.000905269
C11	5	SPX12	0.241891	0.00295784
C11	6	SPX12	0.240584	0.00105135
C11	7	SPX12	0.240179	4.59099e-05
C11	8	SPX12	0.239314	-0.00141922
C11	9	SPX12	0.240986	-0.000347263
C11	10	SPX12	0.240475	-0.00145851
C11	11	SPX12	0.241542	-0.00099167
C11	12	SPX12	0.242438	-0.000696019
C11	13	SPX12	0.241415	-0.00231853
C11	14	SPX12	0.241686	-0.00264748
C11	15	SPX12	0.243612	-0.00132189
C11	16	SPX12	0.24532	-0.000214469
C11	17	SPX12	0.24418	-0.00195412
C11	18	SPX12	0.249689	0.00295497
C11	19	SPX12	0.252173	0.00483873
C11	20	SPX12	0.255783	0.00784872
C11	21	SPX12	0.266446	0.0179115
C11	22	SPX12	0.286377	0.0372421
C11	23	SPX12	0.317483	0.0677486
C11	24	SPX12	0.369825	0.11949
C11	25	SPX12	0.456835	0.2059
C11	26	SPX12	0.593047	0.341512
C11	27	SPX12	0.75615	0.504015
C11	28	SPX12	0.938023	0.685288
C11	29	SPX12	1.12498	0.871643
C11	30	SPX12	1.28511	1.03117
C11	31	SPX12	1.42645	1.17192
C11	32	SPX12	1.57941	1.32427
C11	33	SPX12	1.71353	1.4578
C11	34	SPX12	1.84353	1.58719
C11	35	SPX12	1.93271	1.67577
C11	36	SPX12	2.02764	1.77011
C11	37	SPX12	2.09971	1.84157
C11	38	SPX12	2.164	1.90526
C11	39	SPX12	2.21579	1.95645
C11	40	SPX12	2.26395	2.00401
C12	1	SPX12	0.29985	-0.00227167
C12	2	SPX12	0.302216	-0.000258107
C12	3	SPX12	0.303476	0.000648627
C12	4	SPX12	0.304584	0.00140361
C12	5	SPX12	0.304495	0.000961638
C12	6	SPX12	0.305608	0.0017218
C12	7	SPX12	0.302953	-0.00128621
C12	8	SPX12	0.306603	0.00201118
C12	9	SPX12	0.304021	-0.00092414
C12	10	SPX12	0.304999	-0.000299246
C12	11	SPX12	0.303299	-0.00235179
C12	12	SPX12	0.306461	0.000456866
C12	13	SPX12	0.303368	-0.00298825
C12	14	SPX12	0.305455	-0.00125415
C12	15	SPX12	0.3061	-0.000962922
C12	16	SPX12	0.304832	-0.0025836
C12	17	SPX12	0.305576	-0.00219215
C12	18	SPX12	0.308397	0.000275182
C12	19	SPX12	0.309334	0.000859276
C12	20	SPX12	0.315332	0.00650428
C12	21	SPX12	0.319352	0.0101721
C12	22	SPX12	0.334209	0.0246754
C12	23	SPX12	0.354572	0.0446863
C12	24	SPX12	0.39288	0.0826407
C12	25	SPX12	0.457422	0.14683
C12	26	SPX12	0.558331	0.247386
C12	27	SPX12	0.688788	0.37749
C12	28	SPX12	0.857746	0.546096
C12	29	SPX12	1.0423	0.730292
C12	30	SPX12	1.20043	0.888075
C12	31	SPX12	1.34394	1.03123
C12	32	SPX12	1.49868	1.18562
C12	33	SPX12	1.6381	1.32468
C12	34	SPX12	1.77522	1.46145
C12	35	SPX12	1.87305	1.55893
C12	36	SPX12	1.98301	1.66853
C12	37	SPX12	2.05671	1.74189
C12	38	SPX12	2.13551	1.82033
C12	39	SPX12	2.19649	1.88096
C12	40	SPX12	2.24635	1.93046
D1	1	SPX9	0.372162	-0.00492641
D1	2	SPX9	0.373641	-0.00335908
D1	3	SPX9	0.37849	0.00157913
D1	4	SPX9	0.379275	0.00245189
D1	5	SPX9	0.373511	-0.00322293
D1	6	SPX9	0.376912	0.000265813
D1	7	SPX9	0.378947	0.00239003
D1	8	SPX9	0.377889	0.00142013
D1	9	SPX9	0.378431	0.00205033
D1	10	SPX9	0.375139	-0.00115301
D1	11	SPX9	0.376003	-0.000200774
D1	12	SPX9	0.375528	-0.000586929
D1	13	SPX9	0.373466	-0.00256092
D1	14	SPX9	0.374143	-0.00179516
D1	15	SPX9	0.373938	-0.00191208
D1	16	SPX9	0.376929	0.00116772
D1	17	SPX9	0.372118	-0.0035545
D1	18	SPX9	0.375282	-0.000302534
D1	19	SPX9	0.371308	-0.00418796
D1	20	SPX9	0.373781	-0.0016258
D1	21	SPX9	0.376914	0.0015949
D1	22	SPX9	0.376331	0.00110044
D1	23	SPX9	0.382224	0.00708221
D1	24	SPX9	0.388135	0.0130821
D1	25	SPX9	0.406524	0.0315587
D1	26	SPX9	0.436427	0.0615507
D1	27	SPX9	0.493104	0.118316
D1	28	SPX9	0.588087	0.213388
D1	29	SPX9	0.737667	0.363056
D1	30	SPX9	0.944595	0.570073
D1	31	SPX9	1.18045	0.806019
D1	32	SPX9	1.40549	1.03114
D1	33	SPX9	1.59981	1.22555
D1	34	SPX9	1.78133	1.40716
D1	35	SPX9	1.92041	1.54633
D1	36	SPX9	2.04373	1.66974
D1	37	SPX9	2.14875	1.77484
D1	38	SPX9	2.22824	1.85443
D1	39	SPX9	2.30193	1.92821
D1	40	SPX9	2.35143	1.9778
D2	1	SPX9	0.316646	0.000106093
D2	2	SPX9	0.318878	0.00234036
D2	3	SPX9	0.318845	0.00230959
D2	4	SPX9	0.317403	0.000870807
D2	5	SPX9	0.317276	0.000746606
D2	6	SPX9	0.31666	0.000133201
D2	7	SPX9	0.317019	0.00049448
D2	8	SPX9	0.316878	0.000356034
D2	9	SPX9	0.315284	-0.00123498
D2	10	SPX9	0.316126	-0.000390245
D2	11	SPX9	0.317802	0.00128848
D2	12	SPX9	0.313931	-0.00258071
D2	13	SPX9	0.317049	0.000539932
D2	14	SPX9	0.314316	-0.00218962
D2	15	SPX9	0.312986	-0.00351756
D2	16	SPX9	0.314994	-0.0015072
D2	17	SPX9	0.314019	-0.00247943
D2	18	SPX9	0.316109	-0.000386336
D2	19	SPX9	0.318387	0.00189394
D2	20	SPX9	0.316597	0.000107132
D2	21	SPX9	0.316447	-4.02252e-05
D2	22	SPX9	0.322071	0.00558611
D2	23	SPX9	0.32335	0.00686733
D2	24	SPX9	0.334459	0.0179791
D2	25	SPX9	0.352948	0.0364714
D2	26	SPX9	0.389261	0.072787
D2	27	SPX9	0.451864	0.135393
D2	28	SPX9	0.560204	0.243735
D2	29	SPX9	0.728194	0.411728
D2	30	SPX9	0.960458	0.643994
D2	31	SPX9	1.20273	0.886269
D2	32	SPX9	1.42621	1.10975
D2	33	SPX9	1.61249	1.29603
D2	34	SPX9	1.78834	1.47189
D2	35	SPX9	1.9206	1.60415
D2	36	SPX9	2.04498	1.72853
D2	37	SPX9	2.14022	1.82378
D2	38	SPX9	2.22893	1.91249
D2	39	SPX9	2.27785	1.96141
D2	40	SPX9	2.35156	2.03512
D3	1	SPX9	0.347064	-0.00167374
D3	2	SPX9	0.346333	-0.00234068
D3	3	SPX9	0.346762	-0.00184772
D3	4	SPX9	0.349712	0.00116551
D3	5	SPX9	0.350479	0.00199732
D3	6	SPX9	0.349997	0.00157878
D3	7	SPX9	0.350572	0.00221757
D3	8	SPX9	0.347748	-0.000541945
D3	9	SPX9	0.349166	0.00093968
D3	10	SPX9	0.34712	-0.00104199
D3	11	SPX9	0.348895	0.000797468
D3	12	SPX9	0.347348	-0.000685612
D3	13	SPX9	0.347143	-0.000826694
D3	14	SPX9	0.347365	-0.000540827
D3	15	SPX9	0.347471	-0.000370475
D3	16	SPX9	0.345749	-0.00202855
D3	17	SPX9	0.343643	-0.00407135
D3	18	SPX9	0.346435	-0.00121524
D3	19	SPX9	0.345976	-0.00160991
D3	20	SPX9	0.344323	-0.00319849
D3	21	SPX9	0.34624	-0.00121825
D3	22	SPX9	0.349697	0.00230314
D3	23	SPX9	0.355527	0.00819759
D3	24	SPX9	0.36023	0.0129646
D3	25	SPX9	0.376717	0.0295155
D3	26	SPX9	0.40227	0.0551318
D3	27	SPX9	0.451678	0.104604
D3	28	SPX9	0.539437	0.192428
D3	29	SPX9	0.690047	0.343101
D3	30	SPX9	0.898948	0.552067
D3	31	SPX9	1.14779	0.80097
D3	32	SPX9	1.38856	1.04181
D3	33	SPX9	1.59476	1.24807
D3	34	SPX9	1.78017	1.43354
D3	35	SPX9	1.91924	1.57267
D3	36	SPX9	2.05984	1.71334
D3	37	SPX9	2.1569	1.81047
D3	38	SPX9	2.24461	1.89824
D3	39	SPX9	2.3134	1.96709
D3	40	SPX9	2.35804	2.0118
D4	1	SPX10	0.257834	-0.00114489
D4	2	SPX10	0.259464	0.000730243
D4	3	SPX10	0.259664	0.00117564
D4	4	SPX10	0.259897	0.00165376
D4	5	SPX10	0.259919	0.00192163
D4	6	SPX10	0.255554	-0.00219809
D4	7	SPX10	0.260104	0.00259738
D4	8	SPX10	0.255914	-0.00134738
D4	9	SPX10	0.257332	0.000316074
D4	10	SPX10	0.255332	-0.00143862
D4	11	SPX10	0.254545	-0.00198028
D4	12	SPX10	0.256397	0.000117452
D4	13	SPX10	0.25366	-0.00237447
D4	14	SPX10	0.255548	-0.000240586
D4	15	SPX10	0.255102	-0.000441123
D4	16	SPX10	0.255092	-0.000206218
D4	17	SPX10	0.253482	-0.00157024
D4	18	SPX10	0.254575	-0.000232169
D4	19	SPX10	0.256101	0.00153896
D4	20	SPX10	0.25483	0.000513224
D4	21	SPX10	0.251529	-0.00254172
D4	22	SPX10	0.255923	0.00209752
D4	23	SPX10	0.25622	0.00263924
D4	24	SPX10	0.261354	0.00801892
D4	25	SPX10	0.272033	0.0189433
D4	26	SPX10	0.295771	0.0429267
D4	27	SPX10	0.334846	0.0822474
D4	28	SPX10	0.404322	0.151969
D4	29	SPX10	0.532943	0.280835
D4	30	SPX10	0.718341	0.466478
D4	31	SPX10	0.94586	0.694243
D4	32	SPX10	1.17763	0.926258
D4	33	SPX10	1.37053	1.1194
D4	34	SPX10	1.56187	1.31099
D4	35	SPX10	1.71054	1.4599
D4	36	SPX10	1.84445	1.59406
D4	37	SPX10	1.95405	1.70391
D4	38	SPX10	2.04221	1.79231
D4	39	SPX10	2.1075	1.85785
D4	40	SPX10	2.16235	1.91295
D5	1	SPX10	0.271604	-0.00751595
D5	2	SPX10	0.275952	-0.00352408
D5	3	SPX10	0.278087	-0.0017457
D5	4	SPX10	0.28012	-6.90916e-05
D5	5	SPX10	0.27955	-0.000995418
D5	6	SPX10	0.276838	-0.00406331
D5	7	SPX10	0.281507	0.000249106
D5	8	SPX10	0.281124	-0.000489942
D5	9	SPX10	0.284736	0.00276497
D5	10	SPX10	0.283949	0.0016224
D5	11	SPX10	0.283226	0.00054208
D5	12	SPX10	0.285535	0.00249505
D5	13	SPX10	0.284071	0.000675246
D5	14	SPX10	0.285756	0.00200296
D5	15	SPX10	0.286168	0.00205853
D5	16	SPX10	0.285445	0.000979496
D5	17	SPX10	0.284379	-0.000442651
D5	18	SPX10	0.285792	0.000614337
D5	19	SPX10	0.286159	0.00062437
D5	20	SPX10	0.282729	-0.00316223
D5	21	SPX10	0.284455	-0.00179277
D5	22	SPX10	0.28347	-0.00313341
D5	23	SPX10	0.286247	-0.000712604
D5	24	SPX10	0.289295	0.00197859
D5	25	SPX10	0.294283	0.00660992
D5	26	SPX10	0.308716	0.0206867
D5	27	SPX10	0.332063	0.0436775
D5	28	SPX10	0.378629	0.0898873
D5	29	SPX10	0.463574	0.174476
D5	30	SPX10	0.604761	0.315306
D5	31	SPX10	0.809918	0.520107
D5	32	SPX10	1.05869	0.76852
D5	33	SPX10	1.29371	1.00319
D5	34	SPX10	1.50849	1.21761
D5	35	SPX10	1.67891	1.38767
D5	36	SPX10	1.84899	1.55739
D5	37	SPX10	1.96799	1.67604
D5	38	SPX10	2.07728	1.78497
D5	39	SPX10	2.15693	1.86427
D5	40	SPX10	2.21858	1.92556
D6	1	SPX10	0.324014	-0.00328402
D6	2	SPX10	0.326543	-0.000640708
D6	3	SPX10	0.327289	0.000219616
D6	4	SPX10	0.328378	0.00142332
D6	5	SPX10	0.326651	-0.000189558
D6	6	SPX10	0.326261	-0.00046503
D6	7	SPX10	0.327181	0.000568803
D6	8	SPX10	0.324201	-0.00229631
D6	9	SPX10	0.327268	0.000884719
D6	10	SPX10	0.326855	0.000585822
D6	11	SPX10	0.327591	0.00143691
D6	12	SPX10	0.327027	0.000987003
D6	13	SPX10	0.326158	0.000232249
D6	14	SPX10	0.324176	-0.00163541
D6	15	SPX10	0.325201	-0.000496108
D6	16	SPX10	0.325539	-4.36584e-05
D6	17	SPX10	0.322747	-0.00272191
D6	18	SPX10	0.326127	0.00077237
D6	19	SPX10	0.322856	-0.00238433
D6	20	SPX10	0.323277	-0.00184817
D6	21	SPX10	0.324289	-0.000722721
D6	22	SPX10	0.327689	0.00279183
D6	23	SPX10	0.327683	0.00290057
D6	24	SPX10	0.333383	0.00871475
D6	25	SPX10	0.348335	0.0237808
D6	26	SPX10	0.370303	0.0458629
D6	27	SPX10	0.417183	0.0928576
D6	28	SPX10	0.496696	0.172485
D6	29	SPX10	0.634508	0.310411
D6	30	SPX10	0.845867	0.521884
D6	31	SPX10	1.11484	0.790976
D6	32	SPX10	1.4009	1.07715
D6	33	SPX10	1.63474	1.3111
D6	34	SPX10	1.85239	1.52887
D6	35	SPX10	1.99528	1.67187
D6	36	SPX10	2.1276	1.80431
D6	37	SPX10	2.23039	1.90721
D6	38	SPX10	2.30737	1.9843
D6	39	SPX10	2.36419	2.04124
D6	40	SPX10	2.41802	2.09518
D7	1	SPX11	0.256773	-0.00686643
D7	2	SPX11	0.259704	-0.00415807
D7	3	SPX11	0.263779	-0.000306705
D7	4	SPX11	0.263326	-0.000982966
D7	5	SPX11	0.265777	0.00124572
D7	6	SPX11	0.267042	0.00228754
D7	7	SPX11	0.266241	0.00126238
D7	8	SPX11	0.266425	0.00122416
D7	9	SPX11	0.26811	0.00268589
D7	10	SPX11	0.266237	0.000588918
D7	11	SPX11	0.264718	-0.00115251
D7	12	SPX11	0.26858	0.00248634
D7	13	SPX11	0.265569	-0.00074863
D7	14	SPX11	0.264824	-0.00171666
D7	15	SPX11	0.26588	-0.000883548
D7	16	SPX11	0.265036	-0.00195114
D7	17	SPX11	0.265338	-0.00187171
D7	18	SPX11	0.26516	-0.00227259
D7	19	SPX11	0.26512	-0.00253669
D7	20	SPX11	0.265377	-0.00250217
D7	21	SPX11	0.266348	-0.00175423
D7	22	SPX11	0.264881	-0.00344502
D7	23	SPX11	0.266224	-0.00232465
D7	24	SPX11	0.269198	0.000425847
D7	25	SPX11	0.270449	0.00145336
D7	26	SPX11	0.272731	0.00351229
D7	27	SPX11	0.276718	0.00727679
D7	28	SPX11	0.283932	0.0142674
D7	29	SPX11	0.295844	0.0259564
D7	30	SPX11	0.315599	0.0454881
D7	31	SPX11	0.348296	0.0779618
D7	32	SPX11	0.391903	0.121346
D7	33	SPX11	0.456677	0.185896
D7	34	SPX11	0.549306	0.278302
D7	35	SPX11	0.637411	0.366184
D7	36	SPX11	0.747794	0.476343
D7	37	SPX11	0.85094	0.579267
D7	38	SPX11	0.96824	0.696343
D7	39	SPX11	1.0807	0.808579
D7	40	SPX11	1.23001	0.957663
D8	1	SPX11	0.258088	-0.00736398
D8	2	SPX11	0.261474	-0.00446081
D8	3	SPX11	0.26308	-0.00333711
D8	4	SPX11	0.266276	-0.00062375
D8	5	SPX11	0.26763	0.000247737
D8	6	SPX11	0.266353	-0.00151188
D8	7	SPX11	0.269729	0.00138167
D8	8	SPX11	0.270565	0.00173504
D8	9	SPX11	0.268542	-0.00077085
D8	10	SPX11	0.27251	0.00271502
D8	11	SPX11	0.27238	0.00210163
D8	12	SPX11	0.271856	0.0010959
D8	13	SPX11	0.273542	0.00229885
D8	14	SPX11	0.272388	0.000662796
D8	15	SPX11	0.274658	0.00245026
D8	16	SPX11	0.276403	0.00371215
D8	17	SPX11	0.273102	-7.08872e-05
D8	18	SPX11	0.273751	9.46417e-05
D8	19	SPX11	0.269194	-0.00494463
D8	20	SPX11	0.269977	-0.00464379
D8	21	SPX11	0.270667	-0.0044361
D8	22	SPX11	0.272673	-0.00291301
D8	23	SPX11	0.272023	-0.00404516
D8	24	SPX11	0.274974	-0.00157741
D8	25	SPX11	0.275318	-0.00171604
D8	26	SPX11	0.281719	0.00420259
D8	27	SPX11	0.285891	0.00789233
D8	28	SPX11	0.293565	0.0150837
D8	29	SPX11	0.303592	0.0246278
D8	30	SPX11	0.319515	0.0400681
D8	31	SPX11	0.343382	0.0634529
D8	32	SPX11	0.372838	0.0924268
D8	33	SPX11	0.405505	0.12461
D8	34	SPX11	0.446354	0.164977
D8	35	SPX11	0.48467	0.20281
D8	36	SPX11	0.533221	0.250879
D8	37	SPX11	0.580054	0.297229
D8	38	SPX11	0.644921	0.361614
D8	39	SPX11	0.706735	0.422945
D8	40	SPX11	0.786975	0.502703
D9	1	SPX11	0.391831	0.0101152
D9	2	SPX11	0.387725	0.00649874
D9	3	SPX11	0.384705	0.00396912
D9	4	SPX11	0.385544	0.00529849
D9	5	SPX11	0.382082	0.00232693
D9	6	SPX11	0.380515	0.00124996
D9	7	SPX11	0.376134	-0.00264096
D9	8	SPX11	0.37751	-0.000774591
D9	9	SPX11	0.378762	0.000966671
D9	10	SPX11	0.375103	-0.0022017
D9	11	SPX11	0.376915	0.000100472
D9	12	SPX11	0.375783	-0.000541319
D9	13	SPX11	0.373713	-0.00212117
D9	14	SPX11	0.371527	-0.00381745
D9	15	SPX11	0.371967	-0.00288649
D9	16	SPX11	0.373781	-0.000582645
D9	17	SPX11	0.371534	-0.00233949
D9	18	SPX11	0.373486	0.000102396
D9	19	SPX11	0.369411	-0.00348234
D9	20	SPX11	0.373	0.000597179
D9	21	SPX11	0.368508	-0.00340518
D9	22	SPX11	0.368518	-0.00290453
D9	23	SPX11	0.369661	-0.00127207
D9	24	SPX11	0.369349	-0.00109382
D9	25	SPX11	0.371651	0.00169836
D9	26	SPX11	0.375423	0.00596057
D9	27	SPX11	0.376766	0.00779362
D9	28	SPX11	0.383595	0.015113
D9	29	SPX11	0.399743	0.0317517
D9	30	SPX11	0.424865	0.0573638
D9	31	SPX11	0.454431	0.08742
D9	32	SPX11	0.507729	0.141208
D9	33	SPX11	0.573669	0.207638
D9	34	SPX11	0.667766	0.302225
D9	35	SPX11	0.748884	0.383834
D9	36	SPX11	0.857379	0.492819
D9	37	SPX11	0.947757	0.583686
D9	38	SPX11	1.06064	0.697064
D9	39	SPX11	1.16971	0.806621
D9	40	SPX11	1.30575	0.94315
D10	1	SPX12	0.338165	0.00121447
D10	2	SPX12	0.337205	0.00057782
D10	3	SPX12	0.337825	0.00152141
D10	4	SPX12	0.33621	0.000230129
D10	5	SPX12	0.337614	0.00195758
D10	6	SPX12	0.336231	0.000898698
D10	7	SPX12	0.33648	0.00147063
D10	8	SPX12	0.334104	-0.000581183
D10	9	SPX12	0.33316	-0.00120162
D10	10	SPX12	0.332803	-0.00123515
D10	11	SPX12	0.331377	-0.0023377
D10	12	SPX12	0.332753	-0.000638497
D10	13	SPX12	0.331274	-0.0017943
D10	14	SPX12	0.331464	-0.00128069
D10	15	SPX12	0.331048	-0.00137231
D10	16	SPX12	0.329026	-0.00307129
D10	17	SPX12	0.331645	-0.000128293
D10	18	SPX12	0.331744	0.000294325
D10	19	SPX12	0.338395	0.00726827
D10	20	SPX12	0.342317	0.0115137
D10	21	SPX12	0.355882	0.0254026
D10	22	SPX12	0.378722	0.0485662
D10	23	SPX12	0.415163	0.085331
D10	24	SPX12	0.478196	0.148687
D10	25	SPX12	0.579192	0.250007
D10	26	SPX12	0.718234	0.389373
D10	27	SPX12	0.869409	0.540871
D10	28	SPX12	1.02339	0.695179
D10	29	SPX12	1.18659	0.858698
D10	30	SPX12	1.33104	1.00347
D10	31	SPX12	1.48114	1.1539
D10	32	SPX12	1.62116	1.29424
D10	33	SPX12	1.75606	1.42946
D10	34	SPX12	1.88309	1.55682
D10	35	SPX12	1.97546	1.64951
D10	36	SPX12	2.07166	1.74603
D10	37	SPX12	2.1459	1.8206
D10	38	SPX12	2.20524	1.88027
D10	39	SPX12	2.25825	1.9336
D10	40	SPX12	2.31257	1.98823
D11	1	SPX12	0.293011	0.00362145
D11	2	SPX12	0.294689	0.00492281
D11	3	SPX12	0.29335	0.0032065
D11	4	SPX12	0.292358	0.00183834
D11	5	SPX12	0.291453	0.000556583
D11	6	SPX12	0.292567	0.00129342
D11	7	SPX12	0.292671	0.00102128
D11	8	SPX12	0.292834	0.000807693
D11	9	SPX12	0.29359	0.001187
D11	10	SPX12	0.29145	-0.00133037
D11	11	SPX12	0.291812	-0.00134508
D11	12	SPX12	0.290769	-0.00276447
D11	13	SPX12	0.29084	-0.00306996
D11	14	SPX12	0.289687	-0.00459977
D11	15	SPX12	0.289936	-0.00472743
D11	16	SPX12	0.290911	-0.00412965
D11	17	SPX12	0.292601	-0.00281634
D11	18	SPX12	0.293626	-0.00216843
D11	19	SPX12	0.299319	0.0031487
D11	20	SPX12	0.310439	0.013892
D11	21	SPX12	0.318444	0.0215194
D11	22	SPX12	0.344696	0.0473955
D11	23	SPX12	0.38693	0.0892529
D11	24	SPX12	0.456881	0.158826
D11	25	SPX12	0.566069	0.267638
D11	26	SPX12	0.72863	0.429822
D11	27	SPX12	0.902839	0.603654
D11	28	SPX12	1.08909	0.789533
D11	29	SPX12	1.26379	0.963853
D11	30	SPX12	1.41328	1.11296
D11	31	SPX12	1.55773	1.25704
D11	32	SPX12	1.69138	1.39031
D11	33	SPX12	1.81523	1.51378
D11	34	SPX12	1.93034	1.62852
D11	35	SPX12	2.01083	1.70863
D11	36	SPX12	2.08886	1.78628
D11	37	SPX12	2.15514	1.85219
D11	38	SPX12	2.20703	1.9037
D11	39	SPX12	2.25294	1.94923
D11	40	SPX12	2.29677	1.99268
D12	1	SPX12	1.04104	0.0245818
D12	2	SPX12	1.01693	0.00304557
D12	3	SPX12	1.01356	0.00225795
D12	4	SPX12	1.01145	0.00271297
D12	5	SPX12	1.01186	0.0056988
D12	6	SPX12	1.00667	0.00308298
D12	7	SPX12	0.999207	-0.00180252
D12	8	SPX12	0.997254	-0.0011812
D12	9	SPX12	0.991379	-0.00448176
D12	10	SPX12	0.991028	-0.00225779
D12	11	SPX12	0.991756	0.00104472
D12	12	SPX12	0.986459	-0.00167755
D12	13	SPX12	0.981028	-0.00453471
D12	14	SPX12	0.976545	-0.00644349
D12	15	SPX12	0.974917	-0.00549632
D12	16	SPX12	0.97745	-0.000389218
D12	17	SPX12	0.973852	-0.00141323
D12	18	SPX12	0.974732	0.00204115
D12	19	SPX12	0.972782	0.0026658
D12	20	SPX12	0.977715	0.0101734
D12	21	SPX12	0.985524	0.020557
D12	22	SPX12	1.00607	0.0436769
D12	23	SPX12	1.03586	0.076044
D12	24	SPX12	1.10215	0.144906
D12	25	SPX12	1.18768	0.233013
D12	26	SPX12	1.33342	0.381323
D12	27	SPX12	1.48682	0.5373
D12	28	SPX12	1.65192	0.704969
D12	29	SPX12	1.81445	0.870078
D12	30	SPX12	1.95641	1.01461
D12	31	SPX12	2.0945	1.15528
D12	32	SPX12	2.22099	1.28434
D12	33	SPX12	2.34129	1.40722
D12	34	SPX12	2.44795	1.51645
D12	35	SPX12	2.53174	1.60282
D12	36	SPX12	2.60615	1.6798
D12	37	SPX12	2.66708	1.7433
D12	38	SPX12	2.72325	1.80205
D12	39	SPX12	2.7656	1.84698
D12	40	SPX12	2.81198	1.89593
E1	1	SPX9	0.389567	-0.0059892
E1	2	SPX9	0.394926	-0.000290135
E1	3	SPX9	0.395697	0.000822443
E1	4	SPX9	0.393119	-0.00141583
E1	5	SPX9	0.396352	0.00215821
E1	6	SPX9	0.3952	0.0013469
E1	7	SPX9	0.393526	1.36611e-05
E1	8	SPX9	0.395196	0.00202386
E1	9	SPX9	0.392385	-0.00044652
E1	10	SPX9	0.39241	-8.01021e-05
E1	11	SPX9	0.391698	-0.000451739
E1	12	SPX9	0.391918	0.000108275
E1	13	SPX9	0.389517	-0.00195119
E1	14	SPX9	0.388249	-0.00287896
E1	15	SPX9	0.391193	0.000405369
E1	16	SPX9	0.389279	-0.00116814
E1	17	SPX9	0.387285	-0.00282106
E1	18	SPX9	0.390641	0.000875138
E1	19	SPX9	0.389354	-7.04615e-05
E1	20	SPX9	0.387137	-0.00194741
E1	21	SPX9	0.388724	-1.91453e-05
E1	22	SPX9	0.387125	-0.00127749
E1	23	SPX9	0.394836	0.0067742
E1	24	SPX9	0.400296	0.0125744
E1	25	SPX9	0.41559	0.0282092
E1	26	SPX9	0.442355	0.055315
E1	27	SPX9	0.491581	0.104882
E1	28	SPX9	0.571747	0.185388
E1	29	SPX9	0.713141	0.327123
E1	30	SPX9	0.902837	0.51716
E1	31	SPX9	1.11828	0.732945
E1	32	SPX9	1.32165	0.936653
E1	33	SPX9	1.49908	1.11442
E1	34	SPX9	1.67657	1.29226
E1	35	SPX9	1.80456	1.42058
E1	36	SPX9	1.93334	1.54971
E1	37	SPX9	2.03829	1.655
E1	38	SPX9	2.12724	1.74429
E1	39	SPX9	2.19426	1.81165
E1	40	SPX9	2.25678	1.87451
E2	1	SPX9	0.425065	0.0116384
E2	2	SPX9	0.420006	0.00678742
E2	3	SPX9	0.418329	0.00531919
E2	4	SPX9	0.414125	0.00132224
E2	5	SPX9	0.414917	0.00232283
E2	6	SPX9	0.413344	0.00095739
E2	7	SPX9	0.412981	0.000802071
E2	8	SPX9	0.413052	0.00108148
E2	9	SPX9	0.410791	-0.000971681
E2	10	SPX9	0.409487	-0.0020675
E2	11	SPX9	0.410925	-0.000421597
E2	12	SPX9	0.411853	0.000714658
E2	13	SPX9	0.408236	-0.00269448
E2	14	SPX9	0.406305	-0.0044174
E2	15	SPX9	0.408028	-0.00248661
E2	16	SPX9	0.40663	-0.00367712
E2	17	SPX9	0.40487	-0.0052293
E2	18	SPX9	0.407554	-0.00233736
E2	19	SPX9	0.408951	-0.000732107
E2	20	SPX9	0.407858	-0.00161711
E2	21	SPX9	0.407148	-0.00211959
E2	22	SPX9	0.409091	3.14027e-05
E2	23	SPX9	0.411487	0.00263545
E2	24	SPX9	0.422229	0.0135851
E2	25	SPX9	0.430548	0.0221122
E2	26	SPX9	0.455068	0.0468404
E2	27	SPX9	0.496011	0.0879913
E2	28	SPX9	0.567192	0.15938
E2	29	SPX9	0.694852	0.287248
E2	30	SPX9	0.877377	0.469982
E2	31	SPX9	1.10509	0.697905
E2	32	SPX9	1.33515	0.928175
E2	33	SPX9	1.53501	1.12824
[truncated: 1,847 more rows]

## Sheet: BioGroup Analysis Result
Block Type	96alum
Chemistry	SYBR_GREEN
Experiment File Name	D:\ShuJu\LZM\spx9-12 iaa=lp.eds
Experiment Run End Time	2023-08-17 06:04:16 AM CST
Instrument Type	sds7500
Passive Reference	ROX
Biogroup Name	Target Name	Task	RQ	RQ Min	RQ Max	Cт Mean	ΔCт Mean	ΔCт SE	ΔΔCт
Analysis Type	Singleplex
Endogenous Control	SPX9
RQ Min/Max Confidence Level	95.0
Reference Biogroup Name

## Sheet: Technical Analysis Result
Block Type	96alum
Chemistry	SYBR_GREEN
Experiment File Name	D:\ShuJu\LZM\spx9-12 iaa=lp.eds
Experiment Run End Time	2023-08-17 06:04:16 AM CST
Instrument Type	sds7500
Passive Reference	ROX
Sample Name	Target Name	Task	RQ	RQ Min	RQ Max	Cт Mean	ΔCт Mean	ΔCт SE	ΔΔCт
0d	SPX10	UNKNOWN	1	0.195245	5.12176	29.0525	-0.227267	0.848798	0
0d	SPX11	UNKNOWN	1	0.168983	5.91776	33.2787	3.99896	0.923862	0
0d	SPX12	UNKNOWN	1	0.197348	5.0672	25.9488	-3.33098	0.843233	0
1d lp	SPX10	UNKNOWN	0.929932	0.530649	1.62965	29.9728	-0.122464	0.291512	0.104803
1d lp	SPX11	UNKNOWN	1.20827	0.221496	6.59117	33.8213	3.72601	0.881555	-0.272945
1d lp	SPX12	UNKNOWN	1.02795	0.643054	1.64323	26.7245	-3.37075	0.24375	-0.0397714
1dlp+iaa	SPX10	UNKNOWN	1.32952	0.977113	1.80903	28.8217	-0.638175	0.160029	-0.410908
1dlp+iaa	SPX11	UNKNOWN	2.82261	0.833239	9.56166	31.9618	2.50192	0.633987	-1.49703
1dlp+iaa	SPX12	UNKNOWN	2.23238	1.3931	3.57731	24.9703	-4.48956	0.245021	-1.15859
5d lp	SPX10	UNKNOWN	0.639243	0.344619	1.18575	28.5985	0.418297	0.321044	0.645564
5d lp	SPX11	UNKNOWN	2.02429	1.18376	3.46164	31.1618	2.98154	0.278787	-1.01742
5d lp	SPX12	UNKNOWN	1.51432	1.16572	1.96717	24.2506	-3.92965	0.135947	-0.598668
5d lp+iaa	SPX10	UNKNOWN	0.860073	0.732302	1.01014	28.5813	-0.00979869	0.0835678	0.217468
5d lp+iaa	SPX11	UNKNOWN	2.50348	1.34219	4.66953	31.2661	2.67502	0.323919	-1.32393
5d lp+iaa	SPX12	UNKNOWN	2.62651	0.751728	9.1769	23.8669	-4.72412	0.650063	-1.39314
10d lp	SPX10	UNKNOWN	0.475347	0.395106	0.571882	27.8784	0.845681	0.0960718	1.07295
10d lp	SPX11	UNKNOWN	0.511752	0.233828	1.12001	31.9982	4.96544	0.406994	0.966482
10d lp	SPX12	UNKNOWN	0.578074	0.470271	0.710588	24.4924	-2.5403	0.107245	0.790675
10d lp+iaa	SPX10	UNKNOWN	0.389581	0.293093	0.517833	27.943	1.13274	0.147874	1.36001
10d lp+iaa	SPX11	UNKNOWN	1.41385	0.856075	2.33506	30.3095	3.49932	0.260702	-0.499634
10d lp+iaa	SPX12	UNKNOWN	1.03082	0.784546	1.3544	23.4354	-3.37477	0.141859	-0.043794
0d	SPX8	UNKNOWN	1	0.134245	7.44905	35.8912	6.61146	1.04344	0
1d lp	SPX8	UNKNOWN
1dlp+iaa	SPX8	UNKNOWN	0.970228	0.215872	4.36066	36.115	6.65506	0.681284	0.0436039
Analysis Type	Singleplex
Endogenous Control	SPX9
RQ Min/Max Confidence Level	95.0
Reference Sample	0d
