# Supplementary material for: Genome-wide identification and characterization of SPXdomain-containing genes family in eggplant
Source: PeerJ journal article supplement (doi:10.7717/peerj.17341), 2024-05-28
Supplement: 16SPX_IAA+LP.zip [file spx1-4 iaa lp.xls]

## Sheet: Sample Setup
Block Type	96alum
Chemistry	SYBR_GREEN
Experiment File Name	D:\ShuJu\LZM\7 sample with IAA.eds
Experiment Run End Time	2023-08-17 00:01:40 AM CST
Instrument Type	sds7500
Passive Reference	ROX
Well	Sample Name	Sample Color	Biogroup Name	Biogroup Color	Target Name	Target Color	Task	Reporter	Quencher	Comments
A1	od	RGB(132,193,241)			SPX1	RGB(139,189,249)	UNKNOWN	SYBR	None
A2	od	RGB(132,193,241)			SPX1	RGB(139,189,249)	UNKNOWN	SYBR	None
A3	od	RGB(132,193,241)			SPX1	RGB(139,189,249)	UNKNOWN	SYBR	None
A4	od	RGB(132,193,241)			SPX2	RGB(208,243,98)	UNKNOWN	SYBR	None
A5	od	RGB(132,193,241)			SPX2	RGB(208,243,98)	UNKNOWN	SYBR	None
A6	od	RGB(132,193,241)			SPX2	RGB(208,243,98)	UNKNOWN	SYBR	None
A7	od	RGB(132,193,241)			SPX3	RGB(244,165,230)	UNKNOWN	SYBR	None
A8	od	RGB(132,193,241)			SPX3	RGB(244,165,230)	UNKNOWN	SYBR	None
A9	od	RGB(132,193,241)			SPX3	RGB(244,165,230)	UNKNOWN	SYBR	None
A10	od	RGB(132,193,241)			SPX4	RGB(255,191,168)	UNKNOWN	SYBR	None
A11	od	RGB(132,193,241)			SPX4	RGB(255,191,168)	UNKNOWN	SYBR	None
A12	od	RGB(132,193,241)			SPX4	RGB(255,191,168)	UNKNOWN	SYBR	None
B1	1d lp	RGB(168,255,222)			SPX1	RGB(139,189,249)	UNKNOWN	SYBR	None
B2	1d lp	RGB(168,255,222)			SPX1	RGB(139,189,249)	UNKNOWN	SYBR	None
B3	1d lp	RGB(168,255,222)			SPX1	RGB(139,189,249)	UNKNOWN	SYBR	None
B4	1d lp	RGB(168,255,222)			SPX2	RGB(208,243,98)	UNKNOWN	SYBR	None
B5	1d lp	RGB(168,255,222)			SPX2	RGB(208,243,98)	UNKNOWN	SYBR	None
B6	1d lp	RGB(168,255,222)			SPX2	RGB(208,243,98)	UNKNOWN	SYBR	None
B7	1d lp	RGB(168,255,222)			SPX3	RGB(244,165,230)	UNKNOWN	SYBR	None
B8	1d lp	RGB(168,255,222)			SPX3	RGB(244,165,230)	UNKNOWN	SYBR	None
B9	1d lp	RGB(168,255,222)			SPX3	RGB(244,165,230)	UNKNOWN	SYBR	None
B10	1d lp	RGB(168,255,222)			SPX4	RGB(255,191,168)	UNKNOWN	SYBR	None
B11	1d lp	RGB(168,255,222)			SPX4	RGB(255,191,168)	UNKNOWN	SYBR	None
B12	1d lp	RGB(168,255,222)			SPX4	RGB(255,191,168)	UNKNOWN	SYBR	None
C1	1d lp+iaa	RGB(223,221,142)			SPX1	RGB(139,189,249)	UNKNOWN	SYBR	None
C2	1d lp+iaa	RGB(223,221,142)			SPX1	RGB(139,189,249)	UNKNOWN	SYBR	None
C3	1d lp+iaa	RGB(223,221,142)			SPX1	RGB(139,189,249)	UNKNOWN	SYBR	None
C4	1d lp+iaa	RGB(223,221,142)			SPX2	RGB(208,243,98)	UNKNOWN	SYBR	None
C5	1d lp+iaa	RGB(223,221,142)			SPX2	RGB(208,243,98)	UNKNOWN	SYBR	None
C6	1d lp+iaa	RGB(223,221,142)			SPX2	RGB(208,243,98)	UNKNOWN	SYBR	None
C7	1d lp+iaa	RGB(223,221,142)			SPX3	RGB(244,165,230)	UNKNOWN	SYBR	None
C8	1d lp+iaa	RGB(223,221,142)			SPX3	RGB(244,165,230)	UNKNOWN	SYBR	None
C9	1d lp+iaa	RGB(223,221,142)			SPX3	RGB(244,165,230)	UNKNOWN	SYBR	None
C10	1d lp+iaa	RGB(223,221,142)			SPX4	RGB(255,191,168)	UNKNOWN	SYBR	None
C11	1d lp+iaa	RGB(223,221,142)			SPX4	RGB(255,191,168)	UNKNOWN	SYBR	None
C12	1d lp+iaa	RGB(223,221,142)			SPX4	RGB(255,191,168)	UNKNOWN	SYBR	None
D1	5d lp	RGB(247,255,168)			SPX1	RGB(139,189,249)	UNKNOWN	SYBR	None
D2	5d lp	RGB(247,255,168)			SPX1	RGB(139,189,249)	UNKNOWN	SYBR	None
D3	5d lp	RGB(247,255,168)			SPX1	RGB(139,189,249)	UNKNOWN	SYBR	None
D4	5d lp	RGB(247,255,168)			SPX2	RGB(208,243,98)	UNKNOWN	SYBR	None
D5	5d lp	RGB(247,255,168)			SPX2	RGB(208,243,98)	UNKNOWN	SYBR	None
D6	5d lp	RGB(247,255,168)			SPX2	RGB(208,243,98)	UNKNOWN	SYBR	None
D7	5d lp	RGB(247,255,168)			SPX3	RGB(244,165,230)	UNKNOWN	SYBR	None
D8	5d lp	RGB(247,255,168)			SPX3	RGB(244,165,230)	UNKNOWN	SYBR	None
D9	5d lp	RGB(247,255,168)			SPX3	RGB(244,165,230)	UNKNOWN	SYBR	None
D10	5d lp	RGB(247,255,168)			SPX4	RGB(255,191,168)	UNKNOWN	SYBR	None
D11	5d lp	RGB(247,255,168)			SPX4	RGB(255,191,168)	UNKNOWN	SYBR	None
D12	5d lp	RGB(247,255,168)			SPX4	RGB(255,191,168)	UNKNOWN	SYBR	None
E1	5d lp+iaa	RGB(180,255,0)			SPX1	RGB(139,189,249)	UNKNOWN	SYBR	None
E2	5d lp+iaa	RGB(180,255,0)			SPX1	RGB(139,189,249)	UNKNOWN	SYBR	None
E3	5d lp+iaa	RGB(180,255,0)			SPX1	RGB(139,189,249)	UNKNOWN	SYBR	None
E4	5d lp+iaa	RGB(180,255,0)			SPX2	RGB(208,243,98)	UNKNOWN	SYBR	None
E5	5d lp+iaa	RGB(180,255,0)			SPX2	RGB(208,243,98)	UNKNOWN	SYBR	None
E6	5d lp+iaa	RGB(180,255,0)			SPX2	RGB(208,243,98)	UNKNOWN	SYBR	None
E7	5d lp+iaa	RGB(180,255,0)			SPX3	RGB(244,165,230)	UNKNOWN	SYBR	None
E8	5d lp+iaa	RGB(180,255,0)			SPX3	RGB(244,165,230)	UNKNOWN	SYBR	None
E9	5d lp+iaa	RGB(180,255,0)			SPX3	RGB(244,165,230)	UNKNOWN	SYBR	None
E10	5d lp+iaa	RGB(180,255,0)			SPX4	RGB(255,191,168)	UNKNOWN	SYBR	None
E11	5d lp+iaa	RGB(180,255,0)			SPX4	RGB(255,191,168)	UNKNOWN	SYBR	None
E12	5d lp+iaa	RGB(180,255,0)			SPX4	RGB(255,191,168)	UNKNOWN	SYBR	None
F1	10d lp	RGB(255,204,153)			SPX1	RGB(139,189,249)	UNKNOWN	SYBR	None
F2	10d lp	RGB(255,204,153)			SPX1	RGB(139,189,249)	UNKNOWN	SYBR	None
F3	10d lp	RGB(255,204,153)			SPX1	RGB(139,189,249)	UNKNOWN	SYBR	None
F4	10d lp	RGB(255,204,153)			SPX2	RGB(208,243,98)	UNKNOWN	SYBR	None
F5	10d lp	RGB(255,204,153)			SPX2	RGB(208,243,98)	UNKNOWN	SYBR	None
F6	10d lp	RGB(255,204,153)			SPX2	RGB(208,243,98)	UNKNOWN	SYBR	None
F7	10d lp	RGB(255,204,153)			SPX3	RGB(244,165,230)	UNKNOWN	SYBR	None
F8	10d lp	RGB(255,204,153)			SPX3	RGB(244,165,230)	UNKNOWN	SYBR	None
F9	10d lp	RGB(255,204,153)			SPX3	RGB(244,165,230)	UNKNOWN	SYBR	None
F10	10d lp	RGB(255,204,153)			SPX4	RGB(255,191,168)	UNKNOWN	SYBR	None
F11	10d lp	RGB(255,204,153)			SPX4	RGB(255,191,168)	UNKNOWN	SYBR	None
F12	10d lp	RGB(255,204,153)			SPX4	RGB(255,191,168)	UNKNOWN	SYBR	None
G1	10d lp+ iaa	RGB(253,138,88)			SPX1	RGB(139,189,249)	UNKNOWN	SYBR	None
G2	10d lp+ iaa	RGB(253,138,88)			SPX1	RGB(139,189,249)	UNKNOWN	SYBR	None
G3	10d lp+ iaa	RGB(253,138,88)			SPX1	RGB(139,189,249)	UNKNOWN	SYBR	None
G4	10d lp+ iaa	RGB(253,138,88)			SPX2	RGB(208,243,98)	UNKNOWN	SYBR	None
G5	10d lp+ iaa	RGB(253,138,88)			SPX2	RGB(208,243,98)	UNKNOWN	SYBR	None
G6	10d lp+ iaa	RGB(253,138,88)			SPX2	RGB(208,243,98)	UNKNOWN	SYBR	None
G7	10d lp+ iaa	RGB(253,138,88)			SPX3	RGB(244,165,230)	UNKNOWN	SYBR	None
G8	10d lp+ iaa	RGB(253,138,88)			SPX3	RGB(244,165,230)	UNKNOWN	SYBR	None
G9	10d lp+ iaa	RGB(253,138,88)			SPX3	RGB(244,165,230)	UNKNOWN	SYBR	None
G10	10d lp+ iaa	RGB(253,138,88)			SPX4	RGB(255,191,168)	UNKNOWN	SYBR	None
G11	10d lp+ iaa	RGB(253,138,88)			SPX4	RGB(255,191,168)	UNKNOWN	SYBR	None
G12	10d lp+ iaa	RGB(253,138,88)			SPX4	RGB(255,191,168)	UNKNOWN	SYBR	None
H1	od	RGB(132,193,241)			actin	RGB(243,124,98)	UNKNOWN	SYBR	None
H2	od	RGB(132,193,241)			actin	RGB(243,124,98)	UNKNOWN	SYBR	None
H3	od	RGB(132,193,241)			actin	RGB(243,124,98)	UNKNOWN	SYBR	None
H4	1d lp	RGB(168,255,222)			actin	RGB(243,124,98)	UNKNOWN	SYBR	None
H5	1d lp	RGB(168,255,222)			actin	RGB(243,124,98)	UNKNOWN	SYBR	None
H6	1d lp	RGB(168,255,222)			actin	RGB(243,124,98)	UNKNOWN	SYBR	None
H7	1d lp+iaa	RGB(223,221,142)			actin	RGB(243,124,98)	UNKNOWN	SYBR	None
H8	1d lp+iaa	RGB(223,221,142)			actin	RGB(243,124,98)	UNKNOWN	SYBR	None
H9	1d lp+iaa	RGB(223,221,142)			actin	RGB(243,124,98)	UNKNOWN	SYBR	None
H10	5d lp	RGB(247,255,168)			actin	RGB(243,124,98)	UNKNOWN	SYBR	None
H11	5d lp	RGB(247,255,168)			actin	RGB(243,124,98)	UNKNOWN	SYBR	None
H12	5d lp	RGB(247,255,168)			actin	RGB(243,124,98)	UNKNOWN	SYBR	None

## Sheet: Results
Block Type	96alum
Chemistry	SYBR_GREEN
Experiment File Name	D:\ShuJu\LZM\7 sample with IAA.eds
Experiment Run End Time	2023-08-17 00:01:40 AM CST
Instrument Type	sds7500
Passive Reference	ROX
Well	Sample Name	Target Name	Task	Reporter	Quencher	RQ	RQ Min	RQ Max	Cт	Cт Mean	Cт SD	ΔCт	ΔCт Mean	ΔCт SE	HK Control ΔCт Mean	HK Control ΔCт SE	ΔΔCт	Automatic Ct Threshold	Ct Threshold	Automatic Baseline	Baseline Start	Baseline End	Efficiency	Tm1	Tm2	Tm3	Comments	OUTLIERRG
A1	od	SPX1	UNKNOWN	SYBR	None				26.9397	26.7441	0.254597							TRUE	0.132715	TRUE	3	23	1	78.2949				N
A2	od	SPX1	UNKNOWN	SYBR	None				26.8364	26.7441	0.254597							TRUE	0.132715	TRUE	3	22	1	78.4864				N
A3	od	SPX1	UNKNOWN	SYBR	None				26.4563	26.7441	0.254597							TRUE	0.132715	TRUE	3	22	1	78.4864				N
A4	od	SPX2	UNKNOWN	SYBR	None	1	0.694266	1.44037	27.4423	27.583	0.207448		0.838831	0.189609			0	TRUE	0.332682	TRUE	3	21	1	81.5508				N
A5	od	SPX2	UNKNOWN	SYBR	None	1	0.694266	1.44037	27.4853	27.583	0.207448		0.838831	0.189609			0	TRUE	0.332682	TRUE	3	22	1	81.7424				N
A6	od	SPX2	UNKNOWN	SYBR	None	1	0.694266	1.44037	27.8212	27.583	0.207448		0.838831	0.189609			0	TRUE	0.332682	TRUE	3	22	1	81.7424				N
A7	od	SPX3	UNKNOWN	SYBR	None	1	0.736133	1.35845	26.9225	26.9034	0.105818		0.159306	0.159183			0	TRUE	0.304616	TRUE	3	22	1	79.8271				N
A8	od	SPX3	UNKNOWN	SYBR	None	1	0.736133	1.35845	26.7894	26.9034	0.105818		0.159306	0.159183			0	TRUE	0.304616	TRUE	3	21	1	79.8271				N
A9	od	SPX3	UNKNOWN	SYBR	None	1	0.736133	1.35845	26.9984	26.9034	0.105818		0.159306	0.159183			0	TRUE	0.304616	TRUE	3	21	1	79.8271				N
A10	od	SPX4	UNKNOWN	SYBR	None	1	0.744709	1.34281	22.4823	22.4287	0.0745514		-4.31547	0.153164			0	TRUE	0.15739	TRUE	3	17	1	80.2102				N
A11	od	SPX4	UNKNOWN	SYBR	None	1	0.744709	1.34281	22.4601	22.4287	0.0745514		-4.31547	0.153164			0	TRUE	0.15739	TRUE	3	17	1	80.2102				N
A12	od	SPX4	UNKNOWN	SYBR	None	1	0.744709	1.34281	22.3435	22.4287	0.0745514		-4.31547	0.153164			0	TRUE	0.15739	TRUE	3	17	1	80.0186				N
B1	1d lp	SPX1	UNKNOWN	SYBR	None				26.2565	26.2949	0.0476009							TRUE	0.132715	TRUE	3	22	1	78.4864				N
B2	1d lp	SPX1	UNKNOWN	SYBR	None				26.3482	26.2949	0.0476009							TRUE	0.132715	TRUE	3	22	1	78.678				N
B3	1d lp	SPX1	UNKNOWN	SYBR	None				26.28	26.2949	0.0476009							TRUE	0.132715	TRUE	3	21	1	78.678				N
B4	1d lp	SPX2	UNKNOWN	SYBR	None	0.414343	0.296121	0.579763	28.0601	28.4048	0.298565		2.10993	0.174553			1.2711	TRUE	0.332682	TRUE	3	22	1	81.9339				Y
B5	1d lp	SPX2	UNKNOWN	SYBR	None	0.414343	0.296121	0.579763	28.5711	28.4048	0.298565		2.10993	0.174553			1.2711	TRUE	0.332682	TRUE	3	22	1	81.9339				N
B6	1d lp	SPX2	UNKNOWN	SYBR	None	0.414343	0.296121	0.579763	28.5832	28.4048	0.298565		2.10993	0.174553			1.2711	TRUE	0.332682	TRUE	3	22	1	81.9339				N
B7	1d lp	SPX3	UNKNOWN	SYBR	None	0.539477	0.49071	0.593091	27.3034	27.3446	0.0707507		1.04967	0.0492324			0.890366	TRUE	0.304616	TRUE	3	22	1	80.2102				N
B8	1d lp	SPX3	UNKNOWN	SYBR	None	0.539477	0.49071	0.593091	27.3041	27.3446	0.0707507		1.04967	0.0492324			0.890366	TRUE	0.304616	TRUE	3	21	1	80.0186				N
B9	1d lp	SPX3	UNKNOWN	SYBR	None	0.539477	0.49071	0.593091	27.4263	27.3446	0.0707507		1.04967	0.0492324			0.890366	TRUE	0.304616	TRUE	3	21	1	80.0186				N
B10	1d lp	SPX4	UNKNOWN	SYBR	None	0.548624	0.331719	0.907361	22.5629	22.8455	0.450309		-3.44936	0.261434			0.86611	TRUE	0.15739	TRUE	3	18	1	80.5932				N
B11	1d lp	SPX4	UNKNOWN	SYBR	None	0.548624	0.331719	0.907361	23.3648	22.8455	0.450309		-3.44936	0.261434			0.86611	TRUE	0.15739	TRUE	3	19	1	80.4017				N
B12	1d lp	SPX4	UNKNOWN	SYBR	None	0.548624	0.331719	0.907361	22.6089	22.8455	0.450309		-3.44936	0.261434			0.86611	TRUE	0.15739	TRUE	3	18	1	80.0186				N
C1	1d lp+iaa	SPX1	UNKNOWN	SYBR	None				27.8133	27.8037	0.127737							TRUE	0.132715	TRUE	3	23	1	78.678				N
C2	1d lp+iaa	SPX1	UNKNOWN	SYBR	None				27.9263	27.8037	0.127737							TRUE	0.132715	TRUE	3	23	1	78.8695				N
C3	1d lp+iaa	SPX1	UNKNOWN	SYBR	None				27.6714	27.8037	0.127737							TRUE	0.132715	TRUE	3	24	1	78.8695				N
C4	1d lp+iaa	SPX2	UNKNOWN	SYBR	None	2.33987	1.90173	2.87895	27.2613	27.4161	0.136025		-0.387596	0.107733			-1.22643	TRUE	0.332682	TRUE	3	21	1	82.1254				N
C5	1d lp+iaa	SPX2	UNKNOWN	SYBR	None	2.33987	1.90173	2.87895	27.5167	27.4161	0.136025		-0.387596	0.107733			-1.22643	TRUE	0.332682	TRUE	3	21	1	82.1254				N
C6	1d lp+iaa	SPX2	UNKNOWN	SYBR	None	2.33987	1.90173	2.87895	27.4702	27.4161	0.136025		-0.387596	0.107733			-1.22643	TRUE	0.332682	TRUE	3	22	1	82.1254				N
C7	1d lp+iaa	SPX3	UNKNOWN	SYBR	None	1.66038	1.35113	2.04042	27.1972	27.2315	0.13451		-0.572212	0.107098			-0.731517	TRUE	0.304616	TRUE	3	21	1	80.2102				N
C8	1d lp+iaa	SPX3	UNKNOWN	SYBR	None	1.66038	1.35113	2.04042	27.3798	27.2315	0.13451		-0.572212	0.107098			-0.731517	TRUE	0.304616	TRUE	3	21	1	80.2102				N
C9	1d lp+iaa	SPX3	UNKNOWN	SYBR	None	1.66038	1.35113	2.04042	27.1174	27.2315	0.13451		-0.572212	0.107098			-0.731517	TRUE	0.304616	TRUE	3	22	1	80.2102				N
C10	1d lp+iaa	SPX4	UNKNOWN	SYBR	None	1.20412	1.01652	1.42634	23.1926	23.2202	0.0831733		-4.58345	0.0880047			-0.267976	TRUE	0.15739	TRUE	3	19	1	80.5932				N
C11	1d lp+iaa	SPX4	UNKNOWN	SYBR	None	1.20412	1.01652	1.42634	23.3137	23.2202	0.0831733		-4.58345	0.0880047			-0.267976	TRUE	0.15739	TRUE	3	19	1	80.2102				N
C12	1d lp+iaa	SPX4	UNKNOWN	SYBR	None	1.20412	1.01652	1.42634	23.1544	23.2202	0.0831733		-4.58345	0.0880047			-0.267976	TRUE	0.15739	TRUE	3	19	1	80.2102				N
D1	5d lp	SPX1	UNKNOWN	SYBR	None				24.2184	24.2149	0.0488828							TRUE	0.132715	TRUE	3	20	1	78.8695				N
D2	5d lp	SPX1	UNKNOWN	SYBR	None				24.262	24.2149	0.0488828							TRUE	0.132715	TRUE	3	19	1	78.8695				N
D3	5d lp	SPX1	UNKNOWN	SYBR	None				24.1644	24.2149	0.0488828							TRUE	0.132715	TRUE	3	20	1	78.8695				N
D4	5d lp	SPX2	UNKNOWN	SYBR	None	0.245181	0.194015	0.309841	26.9503	27.0818	0.204906		2.86691	0.121623			2.02808	TRUE	0.332682	TRUE	3	21	1	82.3169				N
D5	5d lp	SPX2	UNKNOWN	SYBR	None	0.245181	0.194015	0.309841	27.3179	27.0818	0.204906		2.86691	0.121623			2.02808	TRUE	0.332682	TRUE	3	21	1	82.3169				N
D6	5d lp	SPX2	UNKNOWN	SYBR	None	0.245181	0.194015	0.309841	26.9773	27.0818	0.204906		2.86691	0.121623			2.02808	TRUE	0.332682	TRUE	3	21	1	82.3169				N
D7	5d lp	SPX3	UNKNOWN	SYBR	None	0.109934	0.0918466	0.131582	27.3829	27.5595	0.15422		3.3446	0.0934046			3.1853	TRUE	0.304616	TRUE	3	22	1	80.4017				N
D8	5d lp	SPX3	UNKNOWN	SYBR	None	0.109934	0.0918466	0.131582	27.6676	27.5595	0.15422		3.3446	0.0934046			3.1853	TRUE	0.304616	TRUE	3	22	1	80.4017				N
D9	5d lp	SPX3	UNKNOWN	SYBR	None	0.109934	0.0918466	0.131582	27.628	27.5595	0.15422		3.3446	0.0934046			3.1853	TRUE	0.304616	TRUE	3	22	1	80.2102				N
D10	5d lp	SPX4	UNKNOWN	SYBR	None	0.488127	0.45796	0.520282	20.953	20.9341	0.0301153		-3.2808	0.0331485			1.03467	TRUE	0.15739	TRUE	3	16	1	80.7847				N
D11	5d lp	SPX4	UNKNOWN	SYBR	None	0.488127	0.45796	0.520282	20.8994	20.9341	0.0301153		-3.2808	0.0331485			1.03467	TRUE	0.15739	TRUE	3	16	1	80.5932				N
D12	5d lp	SPX4	UNKNOWN	SYBR	None	0.488127	0.45796	0.520282	20.95	20.9341	0.0301153		-3.2808	0.0331485			1.03467	TRUE	0.15739	TRUE	3	17	1	80.2102				N
E1	5d lp+iaa	SPX1	UNKNOWN	SYBR	None				23.6717	23.671	0.0838928							TRUE	0.132715	TRUE	3	19	1	78.8695				N
E2	5d lp+iaa	SPX1	UNKNOWN	SYBR	None				23.7546	23.671	0.0838928							TRUE	0.132715	TRUE	3	19	1	78.8695				N
E3	5d lp+iaa	SPX1	UNKNOWN	SYBR	None				23.5868	23.671	0.0838928							TRUE	0.132715	TRUE	3	20	1	79.061				N
E4	5d lp+iaa	SPX2	UNKNOWN	SYBR	None	0.133029	0.114705	0.15428	27.3058	27.42	0.103699		3.74902	0.0770096			2.91019	TRUE	0.332682	TRUE	3	21	1	82.3169				N
E5	5d lp+iaa	SPX2	UNKNOWN	SYBR	None	0.133029	0.114705	0.15428	27.4459	27.42	0.103699		3.74902	0.0770096			2.91019	TRUE	0.332682	TRUE	3	21	1	82.3169				N
E6	5d lp+iaa	SPX2	UNKNOWN	SYBR	None	0.133029	0.114705	0.15428	27.5083	27.42	0.103699		3.74902	0.0770096			2.91019	TRUE	0.332682	TRUE	3	22	1	82.1254				N
E7	5d lp+iaa	SPX3	UNKNOWN	SYBR	None	0.0708193	0.0619325	0.0809813	27.5499	27.65	0.0867491		3.97902	0.069674			3.81971	TRUE	0.304616	TRUE	3	22	1	80.4017				N
E8	5d lp+iaa	SPX3	UNKNOWN	SYBR	None	0.0708193	0.0619325	0.0809813	27.6982	27.65	0.0867491		3.97902	0.069674			3.81971	TRUE	0.304616	TRUE	3	22	1	80.4017				N
E9	5d lp+iaa	SPX3	UNKNOWN	SYBR	None	0.0708193	0.0619325	0.0809813	27.702	27.65	0.0867491		3.97902	0.069674			3.81971	TRUE	0.304616	TRUE	3	22	1	80.4017				N
E10	5d lp+iaa	SPX4	UNKNOWN	SYBR	None	0.347345	0.306084	0.394168	20.8894	20.8811	0.0769135		-2.78991	0.0657107			1.52556	TRUE	0.15739	TRUE	3	16	1	80.5932				N
E11	5d lp+iaa	SPX4	UNKNOWN	SYBR	None	0.347345	0.306084	0.394168	20.8004	20.8811	0.0769135		-2.78991	0.0657107			1.52556	TRUE	0.15739	TRUE	3	16	1	80.5932				N
E12	5d lp+iaa	SPX4	UNKNOWN	SYBR	None	0.347345	0.306084	0.394168	20.9535	20.8811	0.0769135		-2.78991	0.0657107			1.52556	TRUE	0.15739	TRUE	3	17	1	80.2102				N
F1	10d lp	SPX1	UNKNOWN	SYBR	None				19.7348	19.7261	0.0697883							TRUE	0.132715	TRUE	3	15	1	78.678				N
F2	10d lp	SPX1	UNKNOWN	SYBR	None				19.6524	19.7261	0.0697883							TRUE	0.132715	TRUE	3	15	1	78.8695				N
F3	10d lp	SPX1	UNKNOWN	SYBR	None				19.7911	19.7261	0.0697883							TRUE	0.132715	TRUE	3	15	1	78.8695				N
F4	10d lp	SPX2	UNKNOWN	SYBR	None	0.00547441	0.00414534	0.0072296	27.8158	28.078	0.240365		8.35191	0.144506			7.51308	TRUE	0.332682	TRUE	3	22	1	82.1254				N
F5	10d lp	SPX2	UNKNOWN	SYBR	None	0.00547441	0.00414534	0.0072296	28.1304	28.078	0.240365		8.35191	0.144506			7.51308	TRUE	0.332682	TRUE	3	22	1	82.1254				N
F6	10d lp	SPX2	UNKNOWN	SYBR	None	0.00547441	0.00414534	0.0072296	28.2878	28.078	0.240365		8.35191	0.144506			7.51308	TRUE	0.332682	TRUE	3	23	1	82.1254				N
F7	10d lp	SPX3	UNKNOWN	SYBR	None	0.00519471	0.00368203	0.00732884	27.1261	27.4741	0.301798		7.74805	0.178841			7.58874	TRUE	0.304616	TRUE	3	21	1	80.2102				N
F8	10d lp	SPX3	UNKNOWN	SYBR	None	0.00519471	0.00368203	0.00732884	27.6639	27.4741	0.301798		7.74805	0.178841			7.58874	TRUE	0.304616	TRUE	3	22	1	80.2102				N
F9	10d lp	SPX3	UNKNOWN	SYBR	None	0.00519471	0.00368203	0.00732884	27.6324	27.4741	0.301798		7.74805	0.178841			7.58874	TRUE	0.304616	TRUE	3	22	1	80.2102				N
F10	10d lp	SPX4	UNKNOWN	SYBR	None	0.060632	0.0511775	0.071833	19.2983	19.4544	0.135674		-0.271692	0.0880867			4.04378	TRUE	0.15739	TRUE	3	15	1	80.5932				N
F11	10d lp	SPX4	UNKNOWN	SYBR	None	0.060632	0.0511775	0.071833	19.521	19.4544	0.135674		-0.271692	0.0880867			4.04378	TRUE	0.15739	TRUE	3	15	1	80.4017				N
F12	10d lp	SPX4	UNKNOWN	SYBR	None	0.060632	0.0511775	0.071833	19.5439	19.4544	0.135674		-0.271692	0.0880867			4.04378	TRUE	0.15739	TRUE	3	15	1	80.2102				N
G1	10d lp+ iaa	SPX1	UNKNOWN	SYBR	None				18.6791	18.4923	0.300591							TRUE	0.132715	TRUE	3	14	1	78.4864				N
G2	10d lp+ iaa	SPX1	UNKNOWN	SYBR	None				18.6524	18.4923	0.300591							TRUE	0.132715	TRUE	3	14	1	78.678				N
G3	10d lp+ iaa	SPX1	UNKNOWN	SYBR	None				18.1456	18.4923	0.300591							TRUE	0.132715	TRUE	3	14	1	78.678				N
G4	10d lp+ iaa	SPX2	UNKNOWN	SYBR	None	0.00630455	0.00438609	0.00906214	26.688	26.6406	0.127601		8.14822	0.188536			7.30939	TRUE	0.332682	TRUE	3	21	1	81.9339				N
G5	10d lp+ iaa	SPX2	UNKNOWN	SYBR	None	0.00630455	0.00438609	0.00906214	26.496	26.6406	0.127601		8.14822	0.188536			7.30939	TRUE	0.332682	TRUE	3	21	1	81.9339				N
G6	10d lp+ iaa	SPX2	UNKNOWN	SYBR	None	0.00630455	0.00438609	0.00906214	26.7376	26.6406	0.127601		8.14822	0.188536			7.30939	TRUE	0.332682	TRUE	3	21	1	81.9339				N
G7	10d lp+ iaa	SPX3	UNKNOWN	SYBR	None	0.0038821	0.00237914	0.00633453	26.6857	26.6606	0.322247		8.16825	0.254426			8.00895	TRUE	0.304616	TRUE	3	21	1	80.0186				N
G8	10d lp+ iaa	SPX3	UNKNOWN	SYBR	None	0.0038821	0.00237914	0.00633453	26.9696	26.6606	0.322247		8.16825	0.254426			8.00895	TRUE	0.304616	TRUE	3	21	1	80.0186				N
G9	10d lp+ iaa	SPX3	UNKNOWN	SYBR	None	0.0038821	0.00237914	0.00633453	26.3265	26.6606	0.322247		8.16825	0.254426			8.00895	TRUE	0.304616	TRUE	3	21	1	79.8271				N
G10	10d lp+ iaa	SPX4	UNKNOWN	SYBR	None	0.0454495	0.0295304	0.0699503	18.4122	18.6365	0.245441		0.144122	0.224051			4.45959	TRUE	0.15739	TRUE	3	14	1	80.4017				N
G11	10d lp+ iaa	SPX4	UNKNOWN	SYBR	None	0.0454495	0.0295304	0.0699503	18.8987	18.6365	0.245441		0.144122	0.224051			4.45959	TRUE	0.15739	TRUE	3	15	1	80.2102				N
G12	10d lp+ iaa	SPX4	UNKNOWN	SYBR	None	0.0454495	0.0295304	0.0699503	18.5985	18.6365	0.245441		0.144122	0.224051			4.45959	TRUE	0.15739	TRUE	3	14	1	80.0186				N
H1	od	actin	UNKNOWN	SYBR	None	1	0.749729	1.33381	20.7726	20.829	0.0488458		-5.91511	0.149673			0	TRUE	0.34586	TRUE	3	14	1	80.2102				N
H2	od	actin	UNKNOWN	SYBR	None	1	0.749729	1.33381	20.8572	20.829	0.0488458		-5.91511	0.149673			0	TRUE	0.34586	TRUE	3	15	1	80.2102				N
H3	od	actin	UNKNOWN	SYBR	None	1	0.749729	1.33381	20.8573	20.829	0.0488458		-5.91511	0.149673			0	TRUE	0.34586	TRUE	3	15	1	80.2102				N
H4	1d lp	actin	UNKNOWN	SYBR	None	0.479237	0.434848	0.528157	21.525	21.441	0.0733943		-4.85392	0.050506			1.06119	TRUE	0.34586	TRUE	3	16	1	80.4017				N
H5	1d lp	actin	UNKNOWN	SYBR	None	0.479237	0.434848	0.528157	21.4083	21.441	0.0733943		-4.85392	0.050506			1.06119	TRUE	0.34586	TRUE	3	15	1	80.4017				N
H6	1d lp	actin	UNKNOWN	SYBR	None	0.479237	0.434848	0.528157	21.3896	21.441	0.0733943		-4.85392	0.050506			1.06119	TRUE	0.34586	TRUE	3	16	1	80.4017				N
H7	1d lp+iaa	actin	UNKNOWN	SYBR	None	1.86148	1.54721	2.23958	20.9333	20.9921	0.106682		-6.81156	0.0960864			-0.896451	TRUE	0.34586	TRUE	3	15	1	80.4017				N
H8	1d lp+iaa	actin	UNKNOWN	SYBR	None	1.86148	1.54721	2.23958	20.9277	20.9921	0.106682		-6.81156	0.0960864			-0.896451	TRUE	0.34586	TRUE	3	15	1	80.4017				N
H9	1d lp+iaa	actin	UNKNOWN	SYBR	None	1.86148	1.54721	2.23958	21.1153	20.9921	0.106682		-6.81156	0.0960864			-0.896451	TRUE	0.34586	TRUE	3	15	1	80.2102				N
H10	5d lp	actin	UNKNOWN	SYBR	None	0.215201	0.153049	0.302592	20.8414	20.516	0.302814		-3.69887	0.177093			2.21624	TRUE	0.34586	TRUE	3	15	1	80.2102				N
H11	5d lp	actin	UNKNOWN	SYBR	None	0.215201	0.153049	0.302592	20.4644	20.516	0.302814		-3.69887	0.177093			2.21624	TRUE	0.34586	TRUE	3	14	1	80.0186				N
H12	5d lp	actin	UNKNOWN	SYBR	None	0.215201	0.153049	0.302592	20.2424	20.516	0.302814		-3.69887	0.177093			2.21624	TRUE	0.34586	TRUE	3	14	1	79.8271				N
Analysis Type	Singleplex
Endogenous Control	SPX1
RQ Min/Max Confidence Level	95.0
Reference Sample	od

## Sheet: Raw Data
Block Type	96alum
Chemistry	SYBR_GREEN
Experiment File Name	D:\ShuJu\LZM\7 sample with IAA.eds
Experiment Run End Time	2023-08-17 00:01:40 AM CST
Instrument Type	sds7500
Passive Reference	ROX
Well	Cycle	1	2	3	4	5
A1	1	22024.2	4323.64	15557.1	110082	3306.98
A2	1	33153.4	5107.49	18380.8	123034	3033.66
A3	1	30645.1	4655.43	19222.7	119891	2656.93
A4	1	35956.6	5595.67	19015.9	110212	2811.6
A5	1	34790.5	5348.97	20127.8	114296	2954.62
A6	1	55027.9	9850.68	26694.7	137078	5732.29
A7	1	34912.4	5475.59	21854.4	121808	3252.84
A8	1	187672	29384.1	75952.5	401887	15457.1
A9	1	46903.6	7033.97	22941.3	131877	3568.07
A10	1	34846	6101.56	22654.6	140993	3552.05
A11	1	36556.5	5739.95	21273.1	146582	3110.55
A12	1	39158.9	5904.3	19951	146499	3655.63
B1	1	39395.6	6055.66	20944.5	140761	4691.11
B2	1	40514.4	7015.52	21133.2	130241	3557.6
B3	1	32571.4	5637.17	23204.2	136444	2981.78
B4	1	29961.6	4691.59	20264.8	114251	3186.64
B5	1	33362.4	5100.65	24799.9	141790	3720.35
B6	1	25458.8	3825.94	22246	121596	2207.68
B7	1	29601.5	4856.77	22673.5	122482	2559.08
B8	1	110226	15595.5	68635.4	385697	9428.69
B9	1	37599.2	5947.88	22193.8	122473	3008.99
B10	1	43032	6907.52	23569.8	136769	2941.13
B11	1	44269.2	6794.09	23770.4	147369	4186.91
B12	1	46901.3	8027.5	22145.9	144266	6122.79
C1	1	42396.8	6655.41	22194.6	142552	4399.53
C2	1	43402	6972.36	29465.9	182976	5222.59
C3	1	36182	4645.46	22303.4	129776	3117.32
C4	1	30948	4740.49	21711.4	118820	2807.4
C5	1	33123.5	5359.95	25317.5	130898	3229.82
C6	1	30519.3	5098.45	24724.5	127772	2426.19
C7	1	29005.1	4654.98	23535.3	121957	2025.85
C8	1	33166.5	4954.31	23145.8	120494	2798
C9	1	36758.6	7099.84	22798.7	118747	2825.46
C10	1	35498.4	6509.17	24858.5	140918	3217.18
C11	1	33679.8	5609.84	24064.7	148114	3050.41
C12	1	44501.3	6854.62	22667.1	147206	3246.92
D1	1	46944	7326.17	23358	147639	3867.33
D2	1	34465.4	5627.28	22866.7	138470	2965.5
D3	1	38153.8	6474.56	24863.5	134804	3926.85
D4	1	31670.6	5637.34	23771.5	122806	4338.55
D5	1	36060.6	5749.33	26134.6	132657	2937.86
D6	1	40869.6	6979.67	26920.1	131073	4071.44
D7	1	27678.5	4846.58	24094.7	121618	2083.63
D8	1	28469.1	5716.6	24649.5	124563	3172.8
D9	1	42818.6	7771.6	23684.9	121388	3948.43
D10	1	46196.6	7987.09	26853.6	141074	3912
D11	1	44621.5	8126.52	24187.9	134294	3614.56
D12	1	162767	20505.2	29696.9	149843	8063.9
E1	1	47295.8	7094.96	22616.8	143852	4656.94
E2	1	46618.1	7501.58	23662.5	135815	4497.07
E3	1	71187.2	7897.66	25250.8	134033	5351.32
E4	1	35153.7	6064.56	25058.8	131696	3193.68
E5	1	28994.4	4965.32	25524.3	132781	3062.94
E6	1	32598.4	5531.68	27731.3	140536	3822.76
E7	1	40087.7	6959.71	25434.5	122332	4475.96
E8	1	34442.3	6173.79	24780.3	121691	3894.46
E9	1	36192.8	8115.49	27422.9	123716	2503.18
E10	1	37306.2	6501.49	24757.6	135846	4187.52
E11	1	40187	7008.49	22895.5	130286	4816.43
E12	1	61492.3	10337.9	23842.9	138878	5949.94
F1	1	48320.7	8856.38	26003.1	161475	8640.19
F2	1	53206.9	8030.33	24737.2	144904	4025.38
F3	1	35527.5	5804.51	23950.5	137445	6186.14
F4	1	34854.2	5682.88	24152.7	129849	3332.49
F5	1	29424.7	4514.39	25382.3	134736	2380.12
F6	1	63323.2	11601.6	32655.9	152207	7458.89
F7	1	30463.3	5269	24567.7	127064	3320.88
F8	1	29608.3	4857.85	23717.7	125137	2600.28
F9	1	32207.5	5577.74	21929.4	118837	3279.8
F10	1	38244.3	6360.03	25291.6	142490	3962.61
F11	1	30178.5	4499.23	20456.5	123493	2704.29
F12	1	53184.4	9289.96	22238.4	131344	5649.24
G1	1	43482.8	6816.01	22648.9	151096	4280.14
G2	1	52972.5	8291.92	24968.3	150380	4210.61
G3	1	38341.9	6433.43	20468.2	117343	3033.13
G4	1	29656.2	4746.96	22018.9	124693	2575.26
G5	1	29119.3	4793.56	23389.6	129494	2618.98
G6	1	31370.3	5234.52	26619.4	143633	2803.04
G7	1	29297.4	4920.06	22706.1	122780	2642.52
G8	1	39068.5	6217.04	23522.5	125571	3754.45
G9	1	36282.5	5722.14	20946.7	115372	2641.16
G10	1	47268.1	8759.26	25938.4	144455	3281.16
G11	1	80278.9	13137.8	24546.7	126891	8033.99
G12	1	42851.3	6538.53	20465	134695	3023.94
H1	1	61488.8	10375.8	24795.8	159541	7959.1
H2	1	45367.1	7649.49	22947.8	146516	3918.2
H3	1	40644.1	7102.46	24041.7	142929	5483.36
H4	1	37148.9	6955.91	24023.4	136889	3034.37
H5	1	33182.9	5750.19	23267.3	133617	2585.26
H6	1	42938	7212.06	28123.8	154875	4251.32
H7	1	34521.6	8339.8	27321	145891	2937.69
H8	1	34918.7	6285.93	22120.1	124390	2462.59
H9	1	34705.3	5936.62	22344.1	129215	2612.71
H10	1	51180.5	11338.4	28201	156213	5539.6
H11	1	40271	7104.65	22428	145583	2977.71
H12	1	42863.7	6677.01	19852.4	139804	3240.47
A1	2	21858.9	4378.9	15745.7	110520	3208.96
A2	2	33415.1	5125.31	18452.9	123523	3184.52
A3	2	31106.1	4771.95	19314.3	120720	2694.44
A4	2	36101.3	5612.95	19288.6	110735	2850.66
A5	2	35468.2	5541.48	20478	115548	3445.74
A6	2	55898.5	9996.59	26821.5	136340	5700.91
A7	2	35347.2	5773.05	21913.2	121866	3090.34
A8	2	187900	29737	76541.2	401097	15650.2
A9	2	47314.7	6968.88	23016.6	132054	3263.48
A10	2	34775.2	5952.74	22664.7	140255	3838.29
A11	2	36646.7	5991.39	21525.3	146951	2931.68
A12	2	40069.1	5984.66	20173.5	147128	3790.71
B1	2	39957.3	6057.65	20933.5	141177	4305.4
B2	2	40040.4	6701.77	21164.3	129380	3759.59
B3	2	32813.7	5569.45	23416.3	136017	2873.23
B4	2	29828.2	4701.78	20090.5	113472	2851.26
B5	2	33354.7	4903.48	24509.1	140824	3612.95
B6	2	25362.7	3884.66	22135.4	120653	2244.85
B7	2	29625.1	4718.65	22563	121920	2530.67
B8	2	109422	14834.9	68534	384491	9016.35
B9	2	37134.7	5960.66	22034.8	122076	2508.87
B10	2	42577.5	6656.66	23265.9	135065	3248.17
B11	2	44031.2	6794.09	23315.3	146520	4253.88
B12	2	47214.6	8505.55	22216.4	144498	5757.34
C1	2	42560.8	6957.26	22138.2	143119	4572.23
C2	2	43470.6	6465.21	29024.1	181149	5453.95
C3	2	36428.8	4802.74	22356.8	128880	2954.2
C4	2	30978.7	4825.63	21700.4	117926	2539.62
C5	2	33425.2	5503.24	25099.7	129470	3198.73
C6	2	30524.1	4895.77	24656.4	126674	2482.35
C7	2	28786	4674.82	23598	121775	1903
C8	2	33310.7	5059.92	23146.7	119935	2782.72
C9	2	35979.2	7092.88	22620.6	117885	2955.08
C10	2	35754.5	6599.21	24666.6	139234	2917.84
C11	2	33952.2	5550.81	23843.5	147198	2948.8
C12	2	44467.9	7202.64	22796.1	148235	3332.27
D1	2	47052.2	7486.33	23469.9	147565	3792.31
D2	2	34180.1	5232.16	22967.6	137683	3170.13
D3	2	38164	6574.65	24764.1	133846	4095.39
D4	2	31323.3	5496.2	23583.9	122083	3972.69
D5	2	36154.6	5908.07	26066.9	132062	2990.78
D6	2	41204.2	6914.88	26820.5	130124	4066.89
D7	2	27586.1	4709.29	24146.8	120550	2535.52
D8	2	28685.1	5919.12	24490.2	123706	2744.85
D9	2	41851.7	7593.02	23542	119951	3989.56
D10	2	46062.1	8098.69	26591.1	139873	4274.85
D11	2	44857.5	8361.87	24210.6	133840	3911.69
D12	2	164102	20781.1	29946.6	150150	8035.08
E1	2	47408.7	6980.1	22668.1	143927	4411.5
E2	2	46259.5	7789.72	23695.2	135749	4499.16
E3	2	71278.2	8107.71	25093.2	133356	5481.18
E4	2	35617.1	5937.37	25094.6	131446	3218.09
E5	2	29265.2	5072.36	25679.2	132306	3262.47
E6	2	32655.6	5596.45	27672.1	139136	4127.12
E7	2	39752.6	6851.67	25426	121532	4662.46
E8	2	34583.8	6380.46	24603	121374	3785.06
E9	2	36352.4	8467.84	27360.3	122804	3196.07
E10	2	37066.8	6368.22	24541.8	134827	3930.45
E11	2	39889.7	6809.98	22729.9	129529	4609.97
E12	2	62860.1	10632.1	24059.3	139042	6189.53
F1	2	48679.8	8897.83	25819.9	160296	8517.71
F2	2	52390.8	8375.33	24713.9	143735	4167.43
F3	2	35024.6	5769.62	23785.7	137251	6161.82
F4	2	35151.5	5910.76	24173.2	129053	3307.28
F5	2	29462.5	4683.63	25275	133804	2576.84
F6	2	63663.3	11746	32566.3	150680	7493.16
F7	2	30456.1	4965.02	24458.9	126722	3263.17
F8	2	29994.6	4910.26	23712	125000	2565.64
F9	2	32169.9	5410.37	21797.8	118308	3208.33
F10	2	38090.9	6267.38	25123.6	141618	4038.62
F11	2	30292.3	4875.51	20317	123236	2586.89
F12	2	54560.4	9488.15	22457.9	132080	5884.25
G1	2	44094	6859.69	22397.2	150945	4434.8
G2	2	52452.7	8242.24	24675.5	149283	4268.59
G3	2	38038	6405.26	20422.3	116944	3237.7
G4	2	29239	4831.68	21762.1	123860	2582.61
G5	2	29042.6	4826.07	23361.6	128311	2667.89
G6	2	31321	5256.84	26528.5	142387	2776.24
G7	2	29040.5	5072.37	22660.1	121997	2491.14
G8	2	38988.6	6203.12	23606.5	124798	3829.91
G9	2	36357.1	5858.4	20813.4	114402	2679.7
G10	2	46701.9	8678.66	25971.6	143597	3344.34
G11	2	79300	13106.2	24273.4	125916	8462.22
G12	2	43185.6	6810.31	20601.7	135884	2946.38
H1	2	61833.9	10845.7	24769.1	159599	8021.09
H2	2	45290.6	7643.12	22782.8	147018	4166.04
H3	2	40398.3	7387.65	24114.6	143256	5477.14
H4	2	37537.1	6892.41	24110.4	136435	3124.5
H5	2	33258.7	6022.36	23547.8	134995	2584.51
H6	2	43403.3	7541.31	28467.5	155964	4018.06
H7	2	35078.8	8758.21	27507.7	146115	2715.44
H8	2	35337.4	6369.84	22222.9	124870	2566.21
H9	2	35390.6	5967.29	22320	130010	2820.08
H10	2	51610.3	11915.6	28492.2	156761	5594.38
H11	2	39672.7	7083.96	22544	145475	2649.48
H12	2	43780.9	6462.34	19836.1	140590	3256
A1	3	22247.8	4239.91	15657.7	110737	3170.03
A2	3	33582.6	4871.06	18659.7	124144	3311.84
A3	3	30985.6	4946.74	19406	119792	2525.65
A4	3	36121.8	5591.06	19094.7	110575	3067.1
A5	3	35800.8	5575.45	20393	114898	3018.46
A6	3	55861.1	10034.1	26619.5	135712	6071.27
A7	3	35587.1	5826.96	21820.2	121287	3160.25
A8	3	187270	29221.9	75760.1	398308	14804.3
A9	3	47060.2	7013.63	22799.8	131634	3428.63
A10	3	35243.3	6191.31	22476.6	139633	4079.22
A11	3	36736.9	5817.78	21564.6	146562	2959.55
A12	3	39720.7	6121.55	20226.3	147167	3416.75
B1	3	39724.7	6133.42	20935.4	140313	4186.98
B2	3	39928.9	6371.67	20946.3	129567	3758.28
B3	3	32390.8	5707.44	23317.8	135482	3051.4
B4	3	30510.5	4623.61	20167.3	112931	2936.46
B5	3	32786.8	5274.12	24483.2	140539	3938.77
B6	3	25106.8	3726.57	22159.7	120173	2272.96
B7	3	29645.9	4793.83	22495.9	121362	2621.21
B8	3	109855	15493	68227.2	382514	9196.56
B9	3	36934.5	6082.99	21926.3	121248	2617.55
B10	3	42462	6892.7	23163.6	134023	3065.53
B11	3	43284.1	6509.25	23513	145722	3727.34
B12	3	47529.4	8403.32	22058.8	144100	5823.4
C1	3	42200.2	7018.61	22359.3	142760	4285.14
C2	3	43281.9	6877.05	29034.3	181383	4559.14
C3	3	36092.8	4773.83	22360.3	129041	3198.32
C4	3	30879.3	4811.62	21662.7	117976	3476.86
C5	3	33565	5528.93	24930.3	129387	3254.9
C6	3	30359.7	4933.15	24652.9	126440	2567.02
C7	3	29085.4	4787.57	23340	121203	1870.02
C8	3	33320.9	5057.33	22976.2	119786	3018.21
C9	3	35529.2	6894.6	22692.9	117596	2522.12
C10	3	35639.8	6621.72	24662.6	138260	3314.64
C11	3	33696.8	5804.41	23869.7	147059	3173
C12	3	44751.6	6835.62	22515	147403	2973.08
D1	3	47319.2	7430.48	23570.9	147385	4075.07
D2	3	34093.1	5392.28	22964.2	137510	3153.72
D3	3	38125.4	6766.41	24723.9	133776	4219.68
D4	3	31249.2	5424.61	23609.3	122107	4240.21
D5	3	36457.9	6031.84	26007.2	131499	2962.82
D6	3	41153.8	6983.13	26687	129479	4421.72
D7	3	27872.8	4881.12	24154.1	120585	2535.52
D8	3	28794.7	6034.97	24576.8	123852	2834.35
D9	3	41550.9	7603.63	23375.9	119331	3796.34
D10	3	45920.3	8322.82	26583.4	139063	4154.87
D11	3	44431	8150.36	24076.6	133353	3486.32
D12	3	163222	20645.6	29657.1	149483	8146.38
E1	3	47330.6	7003.08	22669.2	143118	4569.88
E2	3	45584.5	7210.18	23561.3	135406	4409.47
E3	3	70741.3	7768.46	24955.2	133102	5588.45
E4	3	35480.9	6021.87	24967.2	131272	3215.28
E5	3	29748.3	4860.94	25559.4	131997	3088.47
E6	3	32472.2	5447.92	27565.7	138643	3727.42
E7	3	39613.1	6993.65	25417.5	121701	4837.6
E8	3	34334.2	6245.99	24595.5	120754	4161.26
E9	3	36019.1	8171.87	27249.6	122411	2889.37
E10	3	36899.1	6337.13	24513.8	133992	3738.56
E11	3	40043.2	6775.29	22675.4	128913	5014.28
E12	3	62592.1	10551.9	24072.3	138865	5990.56
F1	3	48607.1	8683.42	25787.2	159833	8406.71
F2	3	51992.7	7971.61	24568.5	143671	4022.32
F3	3	35002	5909.18	23847.8	137153	6001.44
F4	3	35715.2	5826.98	24050.5	128721	3493.38
F5	3	29692.7	4609.13	25092.9	133378	2656.54
F6	3	63823.3	11804.9	32413.7	149842	7564.11
F7	3	30651	5099.08	24555.6	126179	3049.64
F8	3	29851.4	4731.91	23694.3	124497	2597.8
F9	3	32070.4	5265.54	21824.2	117743	3455.06
F10	3	38156.3	6382.12	25107.3	141347	4229.93
F11	3	30375	4770.88	20302.2	123276	2829.66
F12	3	53988.8	9420.37	22345.7	131383	6064.64
G1	3	44155.4	7110.52	22445.2	150198	4120.33
G2	3	52880.7	8396.01	24835.7	150139	3998.39
G3	3	38280.7	6495.23	20457.6	116429	2877.26
G4	3	29264	4842.98	21814.3	123613	2470.72
G5	3	29162.1	4911.25	23234.7	128231	2484.88
G6	3	31302.3	5368.48	26395.8	142212	2658.61
G7	3	29073.7	5323.47	22612.6	121582	2309.95
G8	3	38876.5	6286.65	23435.1	124578	3801.09
G9	3	36168.1	5620.15	20847.8	114309	2563.19
G10	3	47034.6	8937.47	25911.6	143225	3250.02
G11	3	78066.1	13280.8	24173.2	125366	7897.78
G12	3	43423.7	6724.16	20567.5	136118	2889.34
H1	3	62119.2	10735.3	24717.1	159726	7801
H2	3	45406	8011.44	23163	147882	3808.69
H3	3	40642	7321.25	24125.9	143163	5315.5
H4	3	37392	6850.35	24137.5	136332	2949.92
H5	3	33301.9	5947.72	23619.6	134995	2788.69
H6	3	43039.1	7465.85	28306.9	154473	4127.43
H7	3	35242.8	8817.19	27488.2	145582	2612.25
H8	3	35566.6	6311.8	22306.2	124685	2737.72
H9	3	35476.3	6061.93	22285.5	129230	2823.58
H10	3	51706.8	11973.1	28591.8	157293	5871.26
H11	3	39969.4	7439.19	22520	145807	3061.18
H12	3	43744.6	6398.68	19952.9	140859	2895.95
A1	4	22484.6	4353.78	15742.6	110033	3061.92
A2	4	33292.7	5091.3	18799.1	123804	3332.6
A3	4	31037.7	4919.74	19173.4	118772	2799.47
A4	4	35806.9	5442.41	19154	109470	3018.53
A5	4	35530.2	5703.1	20446.9	114388	2928.1
A6	4	55751.1	9842.35	26519.6	135207	5826.45
A7	4	35244.4	5747.06	21703.6	120482	3180.09
A8	4	185763	29173.5	75614.4	395504	16005.8
A9	4	47013	6880.41	22876.2	130932	3708.5
A10	4	34949.6	6060.67	22293	138317	3715.62
A11	4	36659.6	5693.26	21477.8	145561	2727.25
A12	4	39879.4	6215.29	20237.5	146107	3446.61
B1	4	39340.8	6263.03	21091.9	139572	4359.54
B2	4	40019.1	6434.12	20930.8	128887	3810.41
B3	4	32147.1	5267.92	23104.4	135045	3293.3
B4	4	30517.5	4823.01	19948.3	112888	2844.79
B5	4	33041	5042.47	24523.2	140057	3708.28
B6	4	25647.3	3957.84	22220.7	119834	2208.58
B7	4	29047.4	4765.85	22419.8	121192	2173.84
B8	4	109734	16078.3	68300.4	380786	9410.36
B9	4	36932.6	5845.62	22046	121047	2551.24
B10	4	42455.6	6695.18	22881.6	133795	3169.19
B11	4	43538.7	6655.18	23442.9	145485	3770.06
B12	4	47608.9	8476.75	21930.3	143811	5436.86
C1	4	42728.6	7164.63	22162.4	142076	4675.41
C2	4	43575.2	6592.85	28937.8	180842	4967.42
C3	4	36164.6	4643.15	22225.7	128880	2803.45
C4	4	30942.7	4794.38	21667.1	117708	2775.01
C5	4	33470.5	5423.19	24920	128487	3374.26
C6	4	30616.3	4880.82	24537.6	125878	2579.12
C7	4	29078.4	4839.17	23420.9	120822	1770.25
C8	4	33059.1	5146.49	22934.5	119184	3056.86
C9	4	35390.8	6968.52	22529.2	117178	2813.76
C10	4	35401.5	6484.7	24520.7	137883	2761.7
C11	4	33710.4	5741.01	23877.3	146566	3217.18
C12	4	45017.4	6942.52	22525.3	146502	3064.36
D1	4	46810.5	7708.65	23515.9	147003	3857.71
D2	4	34170.8	5373.85	22821.9	137629	2931.58
D3	4	38276.8	6476.66	24816.9	133332	4280.77
D4	4	31452.2	5677.23	23482.2	121841	4282.51
D5	4	36980.1	6136.72	25977.4	131139	2886.93
D6	4	41289	7083.35	26745.5	128815	4421.72
D7	4	27858.3	4910.47	24071.9	119866	2170.18
D8	4	28793.9	6017.29	24669.1	122959	2690.77
D9	4	40970.8	7564.73	23226.5	118732	4095.73
D10	4	45718.1	8243.1	26438.7	138236	3977.8
D11	4	44364.4	8331.81	24003.4	133497	3745.92
D12	4	162436	20630	29552.1	148405	7998.32
E1	4	47307.8	7198.34	22475	142855	4626.52
E2	4	45763.3	7078.02	23531.8	135406	4692.1
E3	4	70470.2	7959.93	24998.1	132494	5365.44
E4	4	35792.5	6105.48	25155.1	131072	3537.37
E5	4	29658.3	5098.9	25647.8	131776	3022.28
E6	4	32621.9	5498.87	27548.4	138499	3601.83
E7	4	39484.9	6813.27	25311.1	120751	5044.92
E8	4	34445.7	6345.26	24400.4	120515	3896.38
E9	4	35962.5	8140.16	27100	121883	2743.5
E10	4	36697.3	6283.82	24598.7	133492	3840.47
E11	4	39738	6961.27	22759.6	128560	4837.46
E12	4	62722.2	10630.5	23790	137856	5865.38
F1	4	48369.6	8469.02	25606.6	159021	8308.46
F2	4	51702.3	8386.86	24547.3	143608	4169.47
F3	4	35182.1	5776.77	23746.8	136817	6068.11
F4	4	35744.5	5810.23	24093.1	128481	3391.63
F5	4	29726.7	4911.17	25243.4	133254	2525.96
F6	4	64648.9	11937.2	32342.8	149629	7648.61
F7	4	30620.8	5103.76	24349.2	125746	3039.75
F8	4	29917.5	4760.07	23624.8	124075	2567.29
F9	4	31926.6	5444.17	21699.3	117140	3588.64
F10	4	37949.2	6376.17	25146.7	141303	4429.11
F11	4	30422.6	4767.86	20244.8	123127	2516.25
F12	4	54342.4	9398.92	22263.8	130898	5605.38
G1	4	43718.2	6484.86	22366.1	149485	4244.05
G2	4	52396.6	8386.55	24872.2	150190	3989.64
G3	4	37767.5	6491.59	20444.4	116500	3201.39
G4	4	29406.5	5053.58	21781.4	123264	2591.6
G5	4	29037.4	4847.75	23205.9	127948	2590.58
G6	4	31410.9	5443.38	26377.5	141666	2718.91
G7	4	28770.1	5094.24	22619.5	121092	2658.99
G8	4	38688.4	6264.54	23254.6	124177	3690.86
G9	4	36241	5697.28	20670.6	114078	2697.22
G10	4	46914.3	8839.86	25961.7	142741	3660.28
G11	4	76645.7	12565.7	23996.8	125058	7448.85
G12	4	43713.9	6907.37	20553.8	135516	2840.29
H1	4	62053.6	10822.5	24690.3	158447	7642.9
H2	4	45779.2	8026.74	23048.4	147980	4145.29
H3	4	40514.8	7414.86	23967.8	142549	5247.11
H4	4	37348.2	7011.98	24080.1	135906	3066.85
H5	4	33372.5	5914.55	23585.6	134797	2721.13
H6	4	42836.1	7340.87	28110.3	153059	4094.54
H7	4	35254	8870.67	27303.9	145047	2681.3
H8	4	35633.6	6327.89	22246.5	124078	2632.67
H9	4	35557.8	6208.26	22282.1	128207	2676.59
H10	4	51644.8	11840.1	28583	156610	5628.24
H11	4	39921.2	7209.27	22458.7	145189	3118.7
H12	4	43372.7	6838.38	20111.7	140467	3220.7
A1	5	22106.9	4558.07	15587	109598	3281.04
A2	5	32978.3	4616.82	18535.6	123499	2892.5
A3	5	31041	4827.37	19105	118238	2595.66
A4	5	35977.1	5609.49	19020.5	109433	2934.07
A5	5	35564	5385	20258.3	114097	3077.4
A6	5	54949.7	9687.06	26406.8	134208	5548.16
A7	5	35234.7	5673.9	21650.8	120216	3113.96
A8	5	184731	29939.1	75119	394216	14743
A9	5	47166.2	7003.46	22737.7	130638	3144.81
A10	5	34890.6	6127.69	22241.4	137455	4032.8
A11	5	36940.1	5710.02	21340.2	145132	2838.75
A12	5	39999.8	5940.02	20074.8	145823	3401.11
B1	5	38651.8	6211.19	20860.7	139712	4132.85
B2	5	39874.8	6399.92	21144.5	129231	3366.04
B3	5	32268.9	5809.66	23079.2	135030	3162.32
B4	5	30649.8	5029.21	20071	112172	2712.15
B5	5	32710.8	4926.1	24486.7	139493	3946.01
B6	5	25194.6	3750.05	22015.4	119997	2079.84
B7	5	29351.6	4664.45	22365.5	120986	2547.54
B8	5	108477	14848.4	68055.5	380313	8008.43
B9	5	36689.3	6045.56	21946.9	120921	2684.79
B10	5	42067.4	6779.13	22982.9	133167	2915.46
B11	5	43098.5	6525.6	23406.1	145489	3966.36
B12	5	46750.4	8158.53	21804.6	142879	5938.66
C1	5	42344.2	6876.28	22105.9	141722	4428.69
C2	5	43570.1	6793.67	29012.3	180840	4877.25
C3	5	36297.9	4709.06	22099.2	128926	2705.58
C4	5	31053.8	5010.98	21711.4	117135	3390.48
C5	5	33953.5	5372.79	24892.1	128898	3577.88
C6	5	30427.9	5124.2	24479.1	125543	2254.25
C7	5	29181	4889.99	23423.5	121154	2039.87
C8	5	33077.8	5106.67	23013.4	118961	2523.86
C9	5	35381.4	7009.4	22475.9	116988	2829.96
C10	5	35306.6	6582.57	24525.7	137540	2832.31
C11	5	33402.8	5794.58	23808.6	146637	3119.99
C12	5	44826.1	7194.32	22482.7	145989	3224.4
D1	5	47024.6	7442.07	23427	147234	4159.71
D2	5	34057.2	5370.39	22857.8	137564	3057.42
D3	5	38331.7	6658.94	24727	133593	3798.34
D4	5	31469.5	5445.07	23436.6	121933	4301.54
D5	5	37132.2	6034.67	25906.7	131307	2944.85
D6	5	41309.1	7172.33	26590.1	128878	4383.51
D7	5	28273.5	4793.91	24016.2	119931	2311.4
D8	5	28465	6145.52	24599.2	123325	2923.86
D9	5	40563.5	7558.54	23116	118564	3979.99
D10	5	45541	8202.78	26461.7	138045	4429.66
D11	5	44464.9	8335.95	24207.5	133682	3540.53
D12	5	161474	20407.7	29486.9	147717	7965.52
E1	5	47415.9	6820.45	22608.1	142669	4467.09
E2	5	45547.5	7364	23541.3	134940	4285.36
E3	5	69618.6	7917.17	24720.1	132608	5068.09
E4	5	35919.7	6284.27	24969.9	131075	3215.28
E5	5	30053.1	5054.67	25693.9	131988	3015.66
E6	5	32547.5	5581.77	27459.3	138409	3669.67
E7	5	39338	6875.78	25379.9	120614	4723.05
E8	5	34587.9	6381.36	24420.2	120194	3728.43
E9	5	35823.7	7932.27	26984.8	121333	2831.39
E10	5	36635.3	6553.02	24305.3	133497	3890.97
E11	5	39630.4	6860.09	22739.5	128720	4718.93
E12	5	62037	10726.6	23821.7	137805	5996.37
F1	5	48261.3	8667.7	25554.3	158825	8206.4
F2	5	51268.6	8003.07	24584.7	143525	3831.22
F3	5	35181.2	6113.16	23852.2	136615	5823.95
F4	5	35711.2	5938.41	24076.9	128119	3367.28
F5	5	29738.7	4829.38	25122	133091	2693
F6	5	64942.6	11962.9	32488.4	149091	7843.91
F7	5	30451.8	5187.16	24321.8	125236	2958.13
F8	5	29692	4799.18	23696.7	124040	2329.78
F9	5	31921.3	5308.18	21777.9	117479	3391.25
F10	5	37769.8	6412.72	24956.5	141349	4221.2
F11	5	30127.8	4681.34	20330.9	123412	2271.49
F12	5	54163.8	9488.15	22118.1	130284	5592.97
G1	5	44330.8	6837.15	22240.2	148707	4269.83
G2	5	52173.7	8453.97	25073.3	150036	4042.15
G3	5	37902.3	6517.04	20485.9	115803	3431.64
G4	5	29442.5	4717.1	21763.7	123232	2782.72
G5	5	29322.3	4880.27	23151.4	127691	2687.61
G6	5	31171.2	5440.5	26302	141463	2734.55
G7	5	29022.8	5008.28	22453.2	121103	2570.36
G8	5	38719.1	6303.03	23515.8	124114	3592.51
G9	5	35985	6011.8	20687.8	114048	2662.18
G10	5	46853.7	8888.21	25877.5	142398	3515.59
G11	5	75619.2	12578.1	23894.4	125203	7687.48
G12	5	43386.2	6811.52	20531.1	134574	3138.01
H1	5	61993.9	10406.1	24646.1	158179	7980.8
H2	5	45713.4	7933.7	23213.3	148281	4065.75
H3	5	40396.2	7474.73	24013	142437	5365.24
H4	5	37336.1	7011.98	23991.5	135671	2862.23
H5	5	33812.7	5992.2	23706.2	134666	2512.45
H6	5	42663.7	7391.17	27964.8	152300	4461.63
H7	5	34982.2	8956.4	27509.2	144244	2585.26
H8	5	35533.5	6437.66	22174.2	123867	2746.29
H9	5	35172.3	6076.82	22130.3	128177	2462.21
H10	5	51362.4	12089.9	28523.4	155931	5430.04
H11	5	39917.6	7316.18	22492.6	144983	3401.81
H12	5	43536.4	6372.03	20179.6	140146	3366.14
A1	6	22073.1	4263.35	15587	109452	3641.43
A2	6	33554.4	4914.79	18779.2	123962	3191.43
A3	6	30746.1	5068.96	18916.3	118670	2912
A4	6	35452.3	5357.14	18772.9	108900	3018.53
A5	6	35516.6	5610.45	20261.4	113952	3119.64
A6	6	55064.2	9738.13	26198.3	133960	5831.69
A7	6	34968.1	5559.34	21559.7	119509	3308.58
A8	6	183361	29202	74713.9	394225	14090.1
A9	6	46688.3	6902.78	22784.6	130439	3695.65
A10	6	34666.3	6009.55	22163.1	137130	3902.39
A11	6	36401.9	5961.46	21369.1	145015	2615.74
A12	6	39593	6057.57	20012.2	145176	3563.21
B1	6	39353.9	6312.88	20502.2	139007	4212.36
B2	6	39487.7	6576.87	20909.5	128488	3437.71
B3	6	32656.3	5722.77	22872.2	134926	3072.64
B4	6	30550.3	4913.65	20064.1	112998	2767.15
B5	6	32687.7	4984.28	24446.7	139560	3575.54
B6	6	25604.8	3821.42	21984.4	119513	2034.51
B7	6	29233	4740.5	22423.5	121285	2343.38
B8	6	109298	15660.2	67790.9	379554	8332.19
B9	6	36888.5	5897.66	21838.4	120857	2820.18
B10	6	42161.5	6890.73	22921.3	133174	3020.11
B11	6	42975.7	6732.22	23217.6	145024	3652.28
B12	6	47264.9	8327	21920.7	141707	5601.32
C1	6	41953.5	6714.31	22059.8	141337	4506.07
C2	6	43798.2	6694.96	29118.9	180943	4773.48
C3	6	36499.5	4800.42	22219.9	128708	2865.32
C4	6	30801	4812.7	21833.3	117759	2995.28
C5	6	33814.7	5539.8	24958.2	128402	3464.53
C6	6	30569	4860.06	24412.7	125665	2376.07
C7	6	29183.3	4849.5	23427.6	120974	1839.51
C8	6	33103.4	4998.46	22886.4	118739	2936.42
C9	6	35188.7	7133.76	22573.6	116923	2825.46
C10	6	35395.6	6313.43	24397.8	137523	2846.24
C11	6	33568.6	5654.66	23743.3	146560	2985.25
C12	6	44584.7	7058.92	22305.3	145518	3305.01
D1	6	46771.8	7564.3	23482.9	146499	3588.41
D2	6	34189.4	5324.31	22942.9	137537	3386.8
D3	6	38326.6	6695.82	24722.8	133388	3864.7
D4	6	31682.2	5695.64	23540.4	122199	4210.61
D5	6	37444.3	5973.26	25882.8	130871	3076.66
D6	6	41365.9	7056.56	26571.8	128217	4394.43
D7	6	28192.4	4755.92	23906.6	119704	2468.1
D8	6	28769	6096	24823.7	123222	2725.27
D9	6	40425.2	7568.27	23087.3	118739	4022.08
D10	6	45582.8	8126.82	26428.2	137895	4167.44
D11	6	44064.9	8411.64	24110.6	133635	3409.17
D12	6	160608	20305.3	29311.9	147301	8145.38
E1	6	46840.6	6814.7	22508.8	142386	4581.42
E2	6	45342.2	7446.33	23572.9	134850	4365.66
E3	6	69403.7	7802.85	24849.8	132418	5427.54
E4	6	35762.3	6012.08	25146.9	131262	3302.61
E5	6	30022.3	4998.94	25494.8	131932	2946.63
E6	6	32455	5467.78	27526.6	138622	3681.59
E7	6	39134.4	7056.15	25349.7	120839	4594.3
E8	6	34623.7	6372.33	24470.1	120290	4175.65
E9	6	35833.7	8095.23	27102.7	121344	2860.38
E10	6	36891.2	6365.56	24150.9	133256	3681.64
E11	6	39575.6	6723.25	22833.3	128571	4927.3
E12	6	62344.7	10314.5	23757.4	137103	5897.71
F1	6	47507.4	8500.46	25423.5	158432	8262.53
F2	6	50773.4	7975.8	24465.5	143250	4270.65
F3	6	35260.4	5919.02	24006.3	136703	5875.3
F4	6	35837.3	6142.84	24042.8	128273	3064.64
F5	6	29718.4	4814.81	25053	132817	2534.44
F6	6	65505.7	12079.2	32484.5	149239	7878.98
F7	6	30793.4	5068.69	24396	125533	3384.37
F8	6	30139.3	4906.35	23600.6	123940	2727.28
F9	6	32191	5302.55	21667.8	117635	3586.08
F10	6	37937.5	6386.37	24921.4	140810	4243.04
F11	6	29910.6	4980.15	20307.1	122635	2415.76
F12	6	53637	9483	22150.8	129779	5714.61
G1	6	43469.7	6844.19	22187	148517	3928.29
G2	6	52682.8	8385.37	24950.7	150180	4174.51
G3	6	37717.1	6389.81	20423.2	115434	3088.03
G4	6	29505.1	4676.76	21757.3	123289	2292.66
G5	6	29335.6	4872.53	23118.7	127359	2674.2
G6	6	31359.6	5250.36	26291.7	141471	2711.47
G7	6	28918	5110.83	22549	121299	2706.05
G8	6	38627	6213.77	23285.4	123991	3957.95
G9	6	36070.6	5889.25	20589.8	114481	2786.58
G10	6	47032.8	8944.63	25925	142437	3331.52
G11	6	75362	12572.5	23945.6	124944	7850.93
G12	6	43267.2	6617.39	20444.5	134447	3002.27
H1	6	61737.5	10011	24562.6	158377	7814.95
H2	6	46011.5	7802.43	23381.8	149267	3882.46
H3	6	40628	7201.52	23964.8	142370	5274.05
H4	6	37296.4	7048.27	23859.8	135397	3062.79
H5	6	33658.8	5873.08	23786.9	135190	2670.08
H6	6	42708.7	7291.33	27795.2	151655	3954.59
H7	6	35025.6	9071.23	27427.5	143634	2470.96
H8	6	35564.6	6429.97	22014.5	123371	2587.65
H9	6	35075.2	5969.04	22193.2	127679	2579.46
H10	6	51240.4	11910.6	28565.4	155902	5710.91
H11	6	39588.2	7381.71	22507.9	144757	3318.34
H12	6	43738	6856.15	19963.7	139527	3408.5
A1	7	21952.8	4231.54	15631	108906	3226.26
A2	7	33334.1	4898.59	18736.3	124703	3252.33
A3	7	31032.8	5007.85	19198.1	118435	2665.68
A4	7	35521.4	5321.41	18841.3	108992	2632.11
A5	7	35103.9	5547.65	20370.2	113746	3176.61
A6	7	54374.1	9708.95	26161.8	133483	5509.45
A7	7	34968.1	5851.99	21494.1	119601	3118.68
A8	7	182517	28308.4	75191.9	392568	15607.3
A9	7	46977.3	6812.28	22949.5	130642	3829.15
A10	7	34901.1	5994.78	22278.4	136967	3828.34
A11	7	36235.9	5791.44	21194.4	144254	2702.86
A12	7	39895.8	6128.99	19955.2	144841	3217.69
B1	7	38976.5	5916.08	20593.2	139013	4708.03
B2	7	39559.9	6652.7	20993.1	129175	3592.78
B3	7	32635.8	5325.41	22921.4	134511	3152.88
B4	7	30622.9	5148.17	20220.1	112515	3124.1
B5	7	33230.3	4891.62	24338.4	139021	3598.47
B6	7	25232.5	3948.81	22012.6	119737	2065.33
B7	7	29342.6	4772.85	22413.5	121002	2424.16
B8	7	109690	15379.7	67892.2	379323	8988.86
B9	7	36787	5928.7	21847.8	120532	2518.08
B10	7	41942.3	6711.97	22884.6	132589	2860.17
B11	7	43136.9	6845.46	23401.5	145228	3710.02
B12	7	46740.7	7895.03	21718.9	141318	5757.34
C1	7	42231.5	7160.95	21874.4	141308	4319.9
C2	7	43000.5	6511.16	28944.6	180726	4615.27
C3	7	36097.4	4940.35	22082.9	128597	3242.19
C4	7	31122.5	5058.4	21746.9	118046	2770.69
C5	7	33950.6	5494.34	24835.3	128436	3289
C6	7	30465.6	4974.69	24418.8	125719	2195.49
C7	7	29152.5	4954.3	23492.8	121021	2149.53
C8	7	33088.1	5036.55	23061.5	118435	2402.52
C9	7	35586.9	7081.58	22588	116693	3036.09
C10	7	35076.3	6411.3	24434.7	137127	2859.16
C11	7	33325.7	5825.18	23721.5	146581	3102.32
C12	7	44408.9	6975.77	22221.1	144965	3237.44
D1	7	46443	7391.5	23513.9	146384	3938.5
D2	7	34147.6	5343.9	22960.8	137988	3039.91
D3	7	38114.2	6686.34	24616	133460	3998.48
D4	7	31510.9	5446.09	23364.5	121986	3833.11
D5	7	37675.5	6187.74	25849	130894	3252.41
D6	7	41564.4	7009.91	26514.2	128121	4144.23
D7	7	28205.2	5082.3	24028.1	119763	2419.82
D8	7	28969.2	6045.59	24668.1	123494	2744.85
D9	7	40032.8	7459.53	23003.8	118482	3743.74
D10	7	45394.5	8372.52	26204	137666	3861.68
D11	7	44165.4	8405.42	23930.3	133287	3602.04
D12	7	159399	20295.5	29354.4	146873	7864.17
E1	7	46877.8	6880.17	22581.9	142317	4543.66
E2	7	45320	7469.08	23577.1	135106	4310.39
E3	7	69246.8	7620.68	24755.6	132102	5150.9
E4	7	35990.7	6354.54	24970.8	131145	3322.33
E5	7	30156.8	5274.05	25674.6	132017	2854.9
E6	7	32602.3	5713.02	27371.9	138720	3316.73
E7	7	38960.8	7120.45	25304.5	120907	4703.17
E8	7	34723.5	6318.19	24477.7	119856	3888.7
E9	7	35652.5	8049.43	27013.8	121058	2851.03
E10	7	36460.6	6203.86	24274.6	133239	3695.41
E11	7	39307.6	6810.94	22704.1	128402	4815.47
E12	7	62072.4	10396.4	23755	136673	6041.13
F1	7	48179.7	8749.17	25454.9	158101	8155.36
F2	7	50617.7	7856.26	24376.6	143264	3672.82
F3	7	35337.8	6098.85	24009.9	137008	6147.4
F4	7	36225.7	6090.89	24079.4	127971	3268.14
F5	7	29610.4	4656.91	25106.2	132723	2387.75
F6	7	65663	12285.5	32512.6	149198	7918.04
F7	7	30661.8	5160.66	24375	125437	3143.63
F8	7	29944.7	4909.48	23770.2	124089	2484.82
F9	7	32106.6	5311.4	21624.8	117518	3530.78
F10	7	37966	6446.72	24977.1	141058	4460.56
F11	7	30446.4	4785.97	20361.5	122561	2550.07
F12	7	53385.1	9349.16	22064	129653	5677.38
G1	7	43734.3	6945.65	22083.3	147772	4089.39
G2	7	52257.1	8517.85	24989.3	150074	3836.48
G3	7	37634.5	6743.33	20399.3	115440	3201.39
G4	7	29235	4812.32	21743.7	123142	2531.97
G5	7	29494.9	4949.19	23100	127265	2735.73
G6	7	30990	5314.46	26266.8	141096	2876.75
G7	7	28774.4	5172.66	22399.6	121179	2429.96
G8	7	38290.7	6250.62	23331.1	123781	3578.94
G9	7	35789.2	5977.52	20627.6	114255	2835.63
G10	7	47017	9013.59	25972.5	142257	3443.25
G11	7	74878.9	12658	23814.9	125131	7795.36
G12	7	42605.2	6735.08	20174.6	134213	2875.65
H1	7	61363.5	10274.4	24639.8	157999	7963.75
H2	7	45792.7	8235.75	23336.2	149229	3723.38
H3	7	40574.1	7546.57	24122.8	142105	5355.91
H4	7	37269.6	6822.31	23913.3	135423	2900.39
H5	7	33442.4	5983.16	23710.7	135583	2623.54
H6	7	42447.9	7654.1	27770.4	150908	4086.89
H7	7	35049.6	9037.41	27383.2	143329	2758.3
H8	7	35377.3	6357.25	22030.5	122826	2374.69
H9	7	35148	6073.32	22073.4	127271	2561.96
H10	7	51012.8	12145.3	28455	155651	5568.48
H11	7	40022.5	7229.96	22455.4	144802	2899.88
H12	7	42857.1	6854.67	19836.1	139272	2862.06
A1	8	21672.9	4507.83	15546.1	108505	3089.31
A2	8	33680.5	5256.48	18796	124243	3162.37
A3	8	30720.1	4993.64	19024.3	118207	2495.64
A4	8	35259.1	5700.53	18933.8	108797	2868.61
A5	8	34992.3	5439.56	20212.8	113835	3230.63
A6	8	53932.7	9571.38	26074.8	133527	5676.84
A7	8	34842.8	5521.8	21476.5	119327	2852.26
A8	8	181957	29005.6	74635.2	393161	14445.7
A9	8	46531.7	6992.27	22650.2	129972	3487.97
A10	8	34766	5914.12	22158.6	136472	3984.17
A11	8	36573.7	5851.3	21244.2	143851	2767.9
A12	8	39673.3	6230.17	19896.7	144347	3327.18
B1	8	38812	6155.35	20733.3	138338	3868.94
B2	8	39514	6413.3	20892.5	129477	3641
B3	8	32471.5	5166.98	22960.5	134863	2990.04
B4	8	30600.6	4826.41	20049.2	112604	3250.27
B5	8	33027.8	4752.63	24516.2	139914	3553.82
B6	8	25299.9	4048.18	21963.8	119851	2075.31
B7	8	29196.8	4756.24	22404.4	121094	2512.03
B8	8	109086	15414.8	67622	378489	9587.51
B9	8	36842.5	6032.78	21787.9	120434	2825.7
B10	8	41746.6	6478.89	22928.3	132584	3048.74
B11	8	42641.8	6889.82	23336	144422	4040.26
B12	8	46385.2	8142.69	21788	141277	5601.32
C1	8	42062.5	6897.14	21899.7	141022	4207.76
C2	8	43777.7	6548.6	28907.4	181188	4846.63
C3	8	36525	4949.61	22337.1	128920	3065.57
C4	8	30884.5	4916.15	21678.2	117251	2818.2
C5	8	33700.9	5391.57	24866.3	127913	3313.07
C6	8	30569	4868.36	24375.1	125718	2234.37
C7	8	29138.6	4909.04	23556.2	120953	2101.71
C8	8	32940.5	5074.64	22885.5	118320	2654.19
C9	8	35100.4	7032.01	22676.7	117060	2702.15
C10	8	35126.7	6349.64	24251.9	137119	2919.83
C11	8	33553.8	5749.76	23895.8	146440	3129.93
C12	8	44303.6	7119.49	22255.7	145111	3491.12
D1	8	46557.7	7423.11	23358	146029	4009.67
D2	8	34398.1	5331.22	22883.6	137856	3292.69
D3	8	38232.1	6566.22	24629.7	133383	4246.01
D4	8	31402.2	5619.96	23481.1	122479	4106.98
D5	8	37541	6027.12	25868.9	131070	3489.08
D6	8	41306.7	7164.56	26409.1	127939	4160.6
D7	8	28058.3	4799.09	24031.7	119897	2425.28
D8	8	28758.2	6058.85	24663.5	123282	2704.76
D9	8	39711.5	7379.08	23045.5	118543	3768.61
D10	8	45456.7	8041.48	26453.1	137320	3823.95
D11	8	44312.5	8391.94	24070.4	133472	3594.75
D12	8	158383	20004.9	29132.1	146344	7959.56
E1	8	46867	6997.33	22421.6	142377	4760.78
E2	8	45305.2	7425.75	23531.8	134982	4525.23
E3	8	68468.3	7968.29	24805	132236	5383.32
E4	8	35772.9	6162.41	25103.8	131379	3256.59
E5	8	29962.3	4947.63	25688.4	131894	2983.51
E6	8	32574.1	5546.36	27523.9	138766	3852.1
E7	8	38930.8	6941.86	25209.4	119949	4644.47
E8	8	34690.2	6385.87	24457.9	119886	3834.96
E9	8	35911	8206.22	26962.1	120954	2723.86
E10	8	36313	6259.84	24230.4	132813	3934.12
E11	8	39398.6	6792.63	22650.5	128474	4846.06
E12	8	61456.1	10271	23589.8	136422	5974.81
F1	8	47596.5	8664.84	25449.6	157856	8461.57
F2	8	50295.9	7950.64	24462.4	143653	4139.84
F3	8	35398.7	6033.54	23875.2	136911	5578.88
F4	8	36201.1	5847.09	24046.2	127823	3279.45
F5	8	30069.3	4891.74	24990.6	132604	2592.1
F6	8	65798	12163.1	32493.9	149100	7916.45
F7	8	30608.6	5098.3	24200.1	125381	2939.99
F8	8	29924.1	4936.86	23639.3	124209	2303.39
F9	8	31873.1	5406.35	21752.2	117558	3560.56
F10	8	37612.1	6383.82	24973.7	141384	3997.56
F11	8	30226.1	4579.72	20251.7	122656	2548.08
F12	8	53402.5	9440.96	22024.7	129420	5529.25
G1	8	43640.7	7135.88	22190.9	147733	4064.91
G2	8	52387.1	8629.04	24926.3	149751	3934.94
G3	8	37772.9	6476.14	20396.6	115478	3072.98
G4	8	29261.7	4750.99	21821.5	123677	2483.79
G5	8	29351.8	4761.81	23221.5	127296	2545.62
G6	8	31380.3	5306.54	26233.8	141213	2876
G7	8	28615.8	4997.72	22526.8	120980	2693.5
G8	8	38536.4	6317.77	23325.3	123652	3733.26
G9	8	35965.5	5703.28	20686.1	114377	2541.29
G10	8	47181.2	8982.25	25837.2	142128	3237.2
G11	8	74422.4	12373.1	23752.8	124969	7573.07
G12	8	42621.2	6547.02	20386.4	133630	3023.94
H1	8	61442.5	10413.2	24713.9	157021	8202.44
H2	8	45892	7646.94	23429.8	149779	4152.21
H3	8	40548.2	7288.6	23815.9	142030	5136.25
H4	8	37121.3	7119.19	24013.8	135134	2870.35
H5	8	33576.2	5943.95	23912	135406	2625.79
H6	8	42259.8	7252.46	27910	150245	4005.06
H7	8	35099.7	9127.85	27317.1	143072	2584.47
H8	8	35354.3	6402.7	22052	122781	2608.37
H9	8	35225.1	6153.06	22128.6	127542	2611.84
H10	8	51572.7	12007.3	28574.2	155235	5837.4
H11	8	39632.9	7244.91	22460.8	144174	3109.68
H12	8	43108.3	6755.48	19823.9	138627	3234.82
A1	9	22542.8	4409.04	15535.1	108580	3138.32
A2	9	33575.1	5405.46	18832.8	124405	3105.63
A3	9	31112.7	5179.8	19017.5	118178	2723.2
A4	9	35145.1	5276.47	18929.2	108798	2946.74
A5	9	35169.3	5485.89	20303.9	113698	3164.82
A6	9	53806.1	9595.35	26110.2	133058	5374.48
A7	9	34516.1	5647.91	21565.6	119030	3044.05
A8	9	180514	28883.2	75005.3	391755	14979
A9	9	46583.5	6933.29	22707.2	130085	3209.09
A10	9	34577.2	6231.07	22024.2	136578	3771.98
A11	9	36217.3	5942.3	21335.6	143517	3039.7
A12	9	39700.7	6468.25	19914.8	143320	3485
B1	9	39169.6	5963.93	20527.7	138063	4227.58
B2	9	39600.9	6368.69	20920.9	129261	3509.38
B3	9	32442.8	5595	22912.6	134170	2798.89
B4	9	30282.3	4870.59	20068.7	112674	2993.61
B5	9	32728.4	5180.38	24353.7	138994	3772.24
B6	9	25416.3	4027.4	21989.1	119802	2298.34
B7	9	29291.9	4716.9	22426.2	120557	2632.75
B8	9	109027	15671	68002	377999	8622.35
B9	9	36741	5999.91	21744.9	120411	2859.78
B10	9	41200.1	6575.67	22785.2	132310	2794.02
B11	9	42686.6	6755.57	23139.5	143651	4168.43
B12	9	45971.4	8023.18	21586.3	140693	5576.02
C1	9	41800.8	6765.84	21980.4	140756	4539.71
C2	9	43317.9	6531.59	28782.1	180521	5018.45
C3	9	36430	4684.78	22414.9	129047	3107.19
C4	9	31116.2	4836.4	21752.4	118028	3280.34
C5	9	33938.1	5751.27	24874.5	127643	3211.77
C6	9	30492.8	4983.82	24448.5	125693	2461.61
C7	9	28936.5	5026.55	23477.7	120765	2184.98
C8	9	33204.1	5077.24	22877.3	117943	2798.9
C9	9	35063	7078.1	22585.3	116958	2816.46
C10	9	35193.9	6621.72	24305.8	136828	2850.21
C11	9	33641.2	5823	23823.9	146065	2927.82
C12	9	43632.2	7037.54	22259.2	144441	3089.26
D1	9	46554.4	7315.63	23293	145712	3759.61
D2	9	34603.4	5372.69	22949.6	138193	2871.39
D3	9	37547.1	6491.41	24547.3	132851	3898.41
D4	9	31197.2	5406.2	23484.3	122426	3826.77
D5	9	37570	6231.2	25878.8	130441	2699.19
D6	9	41105.7	7218.12	26426.5	127616	4121.48
D7	9	27927.4	4926.88	24145	119552	2168.36
D8	9	28838.8	6239.27	24561.9	123291	2942.51
D9	9	39498.5	7353.44	23068.7	118232	3864.26
D10	9	45179.4	8209.34	26431	137212	4198.41
D11	9	43692.3	8325.58	24159	133111	3492.58
D12	9	157318	20166.8	28956.2	145945	7460.72
E1	9	47285	7129.42	22472.8	141988	4551
E2	9	45329.6	7269.76	23514.9	134670	4628.48
E3	9	68229.3	7764.74	24706.1	131940	5441.66
E4	9	35844.7	6413.24	25004.7	131188	3204.95
E5	9	30139	5337.74	25634.9	131976	3301.24
E6	9	32537.3	5582.63	27592.1	138524	3445.07
E7	9	38775	7185.63	25218.8	120306	4484.48
E8	9	34829.1	6375.94	24439	119723	3900.22
E9	9	35706.5	8097.87	26965.7	120592	2795.86
E10	9	36301.6	6282.93	24150.9	132695	4015.83
E11	9	39304.7	6729.04	22673.5	128213	4695.04
E12	9	60968.3	10332	23578.4	136162	6089.22
F1	9	47826.5	8550.49	25168.3	157807	8494.74
F2	9	50196.6	8016.7	24304.9	143788	3939.54
F3	9	35156	5934.23	23767.1	136740	5975.31
F4	9	35967.3	5845.41	24115.2	127935	3533.38
F5	9	29926.7	5000.24	25044.7	132402	2763.38
F6	9	65804.3	12242.4	32524.3	148945	7868.62
F7	9	30611.5	5157.54	24376.6	125275	3405.8
F8	9	29885.2	4728.78	23775	123930	2262.15
F9	9	32079.5	5255.88	21769.6	117317	3292.56
F10	9	37400	6360.03	24913.7	141254	4132.96
F11	9	29929.2	4672.28	20199.2	122599	2385.91
F12	9	53163.4	9324.28	21870.8	128923	5781.64
G1	9	43199.2	6682.14	22035.3	147618	4004.33
G2	9	52267.9	8281.27	25144	150134	4026.83
G3	9	37533.8	6384.35	20279.1	115517	3433.41
G4	9	29480.1	4942.23	21783.8	123749	2468.27
G5	9	29494.9	4858.59	23086	127305	2660.79
G6	9	31232.4	5374.96	26185.4	141128	2692.86
G7	9	28695.8	5240.52	22441	121222	2497.41
G8	9	38716.8	6381.64	23351.1	123767	3685.77
G9	9	35530.8	5626.15	20692.1	114560	2848.77
G10	9	47175.9	8898.07	25967.1	142045	3321.45
G11	9	74105	12186.2	23838.9	125044	7313.73
G12	9	43054.5	6497.27	20355.7	133483	3252.08
H1	9	61673.9	10664.1	24515.4	156598	8193.14
H2	9	46371.3	8075.17	23299.9	149788	4130.3
H3	9	40113.7	7482.35	23970.9	142057	5072
H4	9	37179.7	7079.6	23935.6	135001	3126.94
H5	9	33584.4	6069.86	23875	135791	2554.48
H6	9	42340.7	7475.76	27752.4	149855	4065.48
H7	9	34848.1	9172.68	27321	142903	2401.9
H8	9	35166.9	6491.5	21913.8	122491	2694.12
H9	9	35043.2	6203	21979.4	127217	2736.96
H10	9	51129.7	12299.5	28429.6	154759	5642.19
H11	9	40022.5	7177.08	22319.7	143757	3194.27
H12	9	43270.3	6697.74	19880.9	137949	2812.64
A1	10	22108.8	4628.4	15531.9	107941	3315.63
A2	10	33780.3	5105.87	18691.9	124649	3149.92
A3	10	31032.8	5186.91	18847.9	117893	2675.68
A4	10	35105.5	5309.89	18769.5	108850	2820.04
A5	10	35200.9	5197.64	20316.4	113811	3143.21
A6	10	53647.6	9554.71	26022.1	132947	5613.02
A7	10	34569.6	5797.12	21407.9	119089	3029.87
A8	10	181854	28376.7	73930	391519	15031.1
A9	10	46363.6	6837.7	22768.3	130163	3038.01
A10	10	34556.2	6033.4	22036.6	136335	3689.09
A11	10	36817	5884.83	21261.5	143484	2927.03
A12	10	39698.8	6249.52	19836.9	142806	3213.43
B1	10	39136.7	5828.35	20351.1	137370	3879.09
B2	10	39309	6344.9	20906.7	129007	3299.58
B3	10	32449.6	5170.81	22958	134399	3198.9
B4	10	30538.6	4922.71	20010.2	112715	2777.93
B5	10	32735	5167.45	24337.2	139306	3828.95
B6	10	25532.7	4134.91	21921.6	119582	2157.81
B7	10	29328.1	4984.39	22386.3	120630	2313.2
B8	10	108586	15784.3	67503.8	378380	9211.83
B9	10	36684.5	5847.45	21784.2	120271	3008.99
B10	10	41271.7	6667.52	22883.6	131998	2760.45
B11	10	42759.5	6599.14	23171.7	143825	3790.85
B12	10	45779.9	8092.29	21626.4	140498	5013.77
C1	10	41793.3	6802.65	21903.2	140287	4467.94
C2	10	43285.3	6441.39	28768.6	180803	4863.65
C3	10	36636.2	4969.27	22358	128751	3049.82
C4	10	31113	4832.09	21586.3	118042	2884.07
C5	10	33486.9	5419.24	24788.8	127981	3010.15
C6	10	30488	4890.79	24570.8	125619	2241.29
C7	10	29521.3	4881.25	23522.8	120814	2025.03
C8	10	32882.5	5130.04	22872.8	117884	2956.19
C9	10	35057.9	7100.71	22602.5	116913	2874.07
C10	10	34952.7	6550.27	24217.9	136700	2789.55
C11	10	33007.8	5773.81	23927.4	146169	3385.05
C12	10	44111	6997.15	22221.1	143922	3086.89
D1	10	46265.3	7580.1	23224.1	145531	3692.28
D2	10	34405.1	5288.6	23030.3	138005	3066.17
D3	10	37903.8	6586.24	24630.8	133146	4017.44
D4	10	31339.6	5602.57	23533	122468	3781.3
D5	10	37599.9	6187.74	26116.7	130502	3046.7
D6	10	41242.6	6977.08	26368.9	127061	4390.79
D7	10	28100.8	4774.05	24084.7	120054	2439.86
D8	10	28689.2	6158.79	24673.7	123215	2873.51
D9	10	39765.7	7249.13	23016.7	118152	3821.21
D10	10	44949.5	8080.87	26207.8	137049	4167.44
D11	10	44136.8	8332.84	24074.5	132718	3488.41
D12	10	155827	19756.3	28990.2	145699	7870.13
E1	10	46546.3	7000.78	22453.2	142017	4557.3
E2	10	44979.4	7387.83	23610.9	134689	4412.59
E3	10	68179.4	7966.44	24816.2	131886	5175.36
E4	10	35951.6	6151.73	25023.1	131461	3123.25
E5	10	30297	5052.01	25792.6	131958	3210.46
E6	10	32513.8	5488.51	27684.9	139131	3278.23
E7	10	38939.7	7248.14	25267.8	120756	4589.56
E8	10	34867.4	6372.33	24538	119795	4198.69
E9	10	35714	8217.67	26930.3	120968	2946.41
E10	10	36213.4	6382.44	24260.2	132304	3526.48
E11	10	39398.6	6851.42	22738.6	128163	4581.29
E12	10	60666.7	10254.3	23546.7	135450	5932.53
F1	10	47461.4	8926.42	25267.8	157508	8128.57
F2	10	49483	7856.26	24335.2	143526	4169.47
F3	10	35121.2	6034.43	23808.8	136571	5713.13
F4	10	36015.6	6085.87	24000.2	128097	3475.99
F5	10	29879.9	4838.29	25212.7	132484	2736.25
F6	10	65744.7	12330.1	32521.1	148451	7750.64
F7	10	30760.4	4979.83	24403.2	125517	3249.98
F8	10	29924.8	4983.8	23641.8	123830	2453.48
F9	10	31733.8	5309.79	21734.9	117605	3546.95
F10	10	37416	6396.57	24869.1	140981	3912.82
F11	10	30116.5	4835.27	20261.6	122277	2694.34
F12	10	53002.1	9313.98	21887.1	128718	5645.93
G1	10	43472.6	6806.15	21922.4	146789	3807.14
G2	10	51992.4	8604.2	25023.6	150270	3966.66
G3	10	37512.2	6412.53	20366.6	115265	3122.57
G4	10	29343.9	4674.34	21682.7	123481	2589.15
G5	10	29166.6	4784.26	23055.7	127117	2433.6
G6	10	31283.7	5423.21	26321.8	141291	2730.08
G7	10	28922.3	5144.76	22537.5	121101	2397.01
G8	10	38593.2	6205.58	23390.2	123691	3934.21
G9	10	35576.5	5860.97	20650.9	114703	2604.37
G10	10	46899.4	9065.53	25923.2	141716	3496.36
G11	10	73177	12382.1	23588.4	124837	7287.58
G12	10	43367.5	6730.23	20296.5	133509	3333.07
H1	10	61157.2	10245.9	24447.6	157034	8019.54
H2	10	46332.3	7932.43	23502.3	150335	3900.91
H3	10	39986.5	7384.38	23937	141327	5548.64
H4	10	37033.8	6920.45	23954.8	134912	3139.11
H5	10	33565.8	6136.2	23769.9	135785	2436.63
H6	10	42187.1	7530.64	27728.4	149498	4296.44
H7	10	34751.5	9101.9	27250.9	142635	2692.42
H8	10	35271.8	6161.47	21859.7	122609	2476.17
H9	10	34947.9	6047.03	22190.6	126938	2791.21
H10	10	51090.1	12179.6	28571.3	154875	5589.4
H11	10	39940.5	7611.63	22441.1	143541	2760.02
H12	10	43719.8	6808.77	19716.6	137410	3095.04
A1	11	21881.4	4583.19	15208.1	107003	3308.43
A2	11	33524.3	5152.84	18768.5	124997	3051.65
A3	11	30509.9	4891.32	19114.6	118117	2979.51
A4	11	35159.2	5652.13	18932.6	108909	2889.72
A5	11	35402.8	5573.39	20226.2	113760	3321.98
A6	11	53241.5	9402.55	26056.5	132819	5899.69
A7	11	34432.5	5624.8	21440.2	119190	3314.25
A8	11	179576	28305.5	74358.4	391522	13939.9
A9	11	46659.5	6953.63	22702.1	129696	3391.05
A10	11	35040.1	6217.44	22178.8	135893	4015.12
A11	11	36638.1	5876.45	21248.8	142956	2767.9
A12	11	39179	6082.86	19798	142162	3047.07
B1	11	38869	6107.5	20374.8	137253	4525.32
B2	11	39049.8	6393.97	20967.6	129038	3845.6
B3	11	32314.1	5319.02	23043.8	134199	3261.44
B4	11	30345.5	4605.48	20074.4	112510	2883.61
B5	11	32800	4953.04	24463.2	139017	3641.91
B6	11	25726.7	3741.92	21999.4	119793	2133.33
B7	11	29175.1	4746.62	22443.4	120539	2652.28
B8	11	108974	15161.2	67959.8	378628	8460.47
B9	11	36719	5855.67	21849.6	120299	2733.6
B10	11	40969.1	6738.63	22751.5	131938	2833.51
B11	11	42350.1	6813.94	23151	143652	3790.85
B12	11	45750.7	8106.69	21477.1	140643	5328.63
C1	11	41472.7	6705.72	21843.3	140578	4268.31
C2	11	42974.8	6487.34	28946.3	180852	4249.52
C3	11	36414.9	4903.35	22507.7	128438	2876.57
C4	11	31243.1	5002.36	21794.5	118049	3247.95
C5	11	33671	5470.63	24710.4	127912	3119.49
C6	11	30330.1	4909.9	24443.3	125765	2466.8
C7	11	29154	4947.15	23546.2	120752	1910.42
C8	11	32984.9	5053.86	22702.2	117770	2877.99
C9	11	35270.2	7032.88	22464.1	117021	2732.75
C10	11	34849.9	6489.59	24210.9	136340	3056.07
C11	11	33073.7	5827.37	23781.4	146043	2999.6
C12	11	44158.5	6899.76	22105.9	144435	2727.7
D1	11	46327.1	7629.62	23290	145517	3473.96
D2	11	34046.8	5343.9	23099.8	138315	3049.76
D3	11	37815.4	6586.24	24521.9	132514	3968.98
D4	11	31169.3	5633.25	23449.3	123018	3874.35
D5	11	37722.1	6191.52	25884.8	130673	2940.85
D6	11	40837.6	7060.02	26399.9	127373	4149.68
D7	11	28038.2	4865.57	23957.8	120235	2415.26
D8	11	28994.1	6314.44	24625.3	123612	2799.86
D9	11	39755.4	7209.35	22976.8	118124	3720.78
D10	11	44922.6	8307.81	26221.2	137436	3912
D11	11	43501.8	8360.84	24241.5	133260	3537.41
D12	11	155440	19852.8	28879.5	145801	7515.38
E1	11	46808.2	7021.45	22466.3	142169	4359.06
E2	11	44834.4	7357.5	23560.3	134440	4220.7
E3	11	68189.2	7471.03	24743.4	131914	5278.87
E4	11	35775.3	6330.52	25159.7	131502	3383.36
E5	11	30129.3	5205.05	25598.1	132142	3120.63
E6	11	32439.3	5577.45	27804.9	139228	3535.83
E7	11	38835.9	6949	25221.6	120475	4849.9
E8	11	34660.3	6365.11	24506.9	119501	4208.28
E9	11	35780.5	8317.21	26865	121060	2781.83
E10	11	36078	6322.91	24146.4	133020	3746.82
E11	11	39258.7	6942	22762.5	128238	4949.29
E12	11	60203	10152.3	23412.5	135902	5872.84
F1	11	47807.2	8726.3	25232.5	157466	8180.88
F2	11	49408.8	7564.74	24288.7	143295	4012.1
F3	11	35213.4	5962.86	23915.1	136673	5789.71
F4	11	36277.2	5897.36	24071.8	127679	3746.45
F5	11	29882.9	4837.48	25241.8	132646	2474.24
F6	11	66121.5	12347.5	32500.1	148012	8036.82
F7	11	30367	5035.95	24360.5	125800	3324.18
F8	11	29738.3	4882.89	23657.9	124055	2512.04
F9	11	32130	5349.22	21836.7	117616	3718.81
F10	11	37662.5	6324.33	24882	140842	4011.53
F11	11	30245.7	4849.35	20287.3	122134	2404.81
F12	11	53140.5	9308.83	21808.5	128585	5427.47
G1	11	43335.2	6756.83	21956.1	146975	4210.54
G2	11	52207	8664.52	25014.7	150300	4218.27
G3	11	37772.9	6627.92	20349.8	115432	3341.31
G4	11	29515.3	4810.7	21845.6	123316	2421.71
G5	11	29150.3	4709.16	23002.7	127133	2713.64
G6	11	31233.8	5349.75	26156.1	141449	2624.36
G7	11	28789.2	5131.19	22493.8	121572	2788.41
G8	11	38555.6	6477.45	23372.7	123638	3519.59
G9	11	35773.1	5772.7	20729.1	114745	2337.18
G10	11	46870.4	9085.23	25770.9	141577	3160.28
G11	11	72867.6	12252.6	23657	124750	7471.73
G12	11	42859.3	6548.23	20225.9	133355	3274.89
H1	11	60898.9	10708.6	24356.2	156577	7937.4
H2	11	45875.9	7742.53	23563.1	150662	3782.17
H3	11	40163.3	7228.73	23943.2	141764	4982.89
H4	11	37131	6899.83	23949.2	134481	3042.49
H5	11	33743.6	6005.02	23838	135660	2713.62
H6	11	42344.5	7359.16	27583.6	149055	3877.35
H7	11	34929.7	9335.48	27274.3	143004	2580.5
H8	11	35231.8	6173.36	21872.2	122611	2659.11
H9	11	35054.4	6285.37	22052.7	126696	2606.59
H10	11	51231.3	12048.6	28500	154680	5484.82
H11	11	39810.2	7300.09	22390.8	143248	2905.52
H12	11	43691.7	6973.11	19660.9	137275	3117.63
A1	12	21975.4	4265.03	15311.9	107068	3174.36
A2	12	32995.3	5266.19	18834.4	124837	3059.96
A3	12	30871.6	4975.17	19128.3	117934	2918.25
A4	12	35174.6	5564.55	19050.2	108876	2605.71
A5	12	35032.9	5554.86	20150.6	114118	3312.16
A6	12	52953.1	9540.12	25906.1	132561	5583.73
A7	12	34769.9	5534.31	21566.6	118903	2992.08
A8	12	180092	27753.4	74294.2	390977	13992
A9	12	46375.1	7129.56	22777.4	129817	3383.14
A10	12	35070.2	6175.4	22063.4	136182	3749.88
A11	12	36420.5	5760.31	21049.8	142874	3050.15
A12	12	39374.2	5980.19	19741	141722	3769.38
B1	12	38866.8	6169.31	20928.1	137849	4312.17
B2	12	38579.1	6124.83	20973.2	129103	3468.99
B3	12	32483.8	5172.09	23129.7	134211	3205.98
B4	12	30261.2	4828.68	20044.6	112807	2860.97
B5	12	32730.6	5218.09	24314.9	139123	3682.94
B6	12	25453.3	4093.35	22002.3	119673	2068.05
B7	12	29281.9	4816.56	22449.7	121188	2553.75
B8	12	108857	16081	67399.7	378270	8585.69
B9	12	36463.2	5984.39	21816.9	120313	2807.28
B10	12	40948.8	6643.82	22827.9	131650	3046.77
B11	12	42577.8	6496.41	23239.5	143569	3676.53
B12	12	45729.6	7964.14	21470.2	140689	5213.37
C1	12	41549.1	7046.83	21947	140368	4312.05
C2	12	43106.9	6861.74	28870.1	180541	4443.46
C3	12	36258.5	4764.57	22330.1	128196	3236.57
C4	12	30963.9	5060.55	21659.4	118372	2980.17
C5	12	33638.3	5476.55	24735.1	127683	3103.44
C6	12	30532.1	5196.46	24387.4	126078	2399.4
C7	12	29221.9	4982.09	23486.1	121119	1771.07
C8	12	33153.7	4891.98	22783.9	118071	2695.53
C9	12	35063.9	7239.85	22587.1	117062	2761.56
C10	12	34880.6	6541.46	24130.9	136191	2669.22
C11	12	33060	5747.57	23854.4	146117	3234.85
C12	12	44134.1	7057.73	22104.8	143807	3141.42
D1	12	46306.1	7541.12	23243	145405	3724.98
D2	12	34354.1	5402.65	23107.6	138550	3066.17
D3	12	37878.4	6540.94	24462.7	132878	4306.05
D4	12	31211.7	5387.79	23502.3	122601	3900.79
D5	12	38050	6247.26	25959.4	130506	3085.65
D6	12	40957.6	7007.32	26165	127073	4258.86
D7	12	28067.9	4906.16	23971.5	120143	2288.62
D8	12	29006.5	6358.66	24844.2	123444	2721.54
D9	12	39311.6	7302.17	22947.2	118492	3626.09
D10	12	44919.8	8060.24	26291.2	137113	3547.21
D11	12	43622.5	8205.31	24165.2	133406	3505.09
D12	12	154912	19715.3	28727.2	145401	7701.2
E1	12	46541.5	7136.31	22483.7	142569	4720.92
E2	12	44785.8	7165.77	23546.5	134715	4404.25
E3	12	67586.4	7693.17	24712.7	132239	4832.85
E4	12	35702.7	6273.59	25139.5	131702	3297.91
E5	12	30130.1	5241.32	25678.3	132282	2960.81
E6	12	32467.5	5589.54	27722.2	139594	3572.5
E7	12	38772.6	7181.17	25284.7	120605	4510.99
E8	12	34675.2	6369.63	24488	119527	3861.83
E9	12	35926	8244.98	27219.7	120665	2863.18
E10	12	36230	6229.63	24194.2	132993	3495.26
E11	12	39307.6	6864.91	22845.7	128224	4757.17
E12	12	60181.4	10286.1	23341.7	135512	6287.36
F1	12	47587.5	8636.25	25420.9	157154	8090.29
F2	12	49359.7	7738.82	24293.8	143756	3784.21
F3	12	35557.9	6031.75	23954	136800	5773.49
F4	12	35966.5	5942.6	24053.9	127947	3644.7
F5	12	29578.7	4946.8	25063.8	132400	2575.99
F6	12	65842.4	12319.5	32442.5	148446	7749.05
F7	12	30997	5108.44	24322.6	125903	3131.26
F8	12	29708.9	4817.18	23745.9	124335	2118.65
F9	12	32235.4	5322.67	21748.9	117590	3554.6
F10	12	37298.6	6078.7	24888.8	141388	4029.88
F11	12	30422.6	4706.49	20370.4	122673	2259.55
F12	12	53024.1	9114.94	21861.7	128836	5241.29
G1	12	43311.8	7013.29	22044.3	146812	3986.29
G2	12	52213	8520.21	24998.2	150356	3845.23
G3	12	37698.3	6595.2	20423.2	115269	3079.18
G4	12	29513	4883.32	21824.7	123836	2372.71
G5	12	29474.3	5011.9	23066.6	126937	2460.42
G6	12	31144.5	5506.04	26175.1	141371	2419.62
G7	12	28811.9	5033.16	22481.6	121524	2446.43
G8	12	38546.4	6280.1	23355.3	123304	3831.61
G9	12	35682.5	5825.83	20748	115093	2451.94
G10	12	47454.2	8984.93	25992.2	141424	3281.16
G11	12	72574.5	12170.4	23481.7	125013	7412.89
G12	12	43073.3	6607.69	20183.7	133802	2962.35
H1	12	61178.4	10254.8	24316.8	156431	7794.8
H2	12	46349.8	8163.11	23588.9	150704	4328.58
H3	12	40668.9	7285.33	23928.8	141729	5292.71
H4	12	37207.2	7105.99	23973.9	135008	2902.02
H5	12	33801.6	6098.51	24106.7	136119	2606.28
H6	12	41982.5	7358.39	27493.6	149071	3765.69
H7	12	35008.4	9375.59	27297.6	142745	2712.26
H8	12	35190.6	6527.16	21867.3	122849	2372.55
H9	12	35316.1	6265.22	22163.9	126766	2436.84
H10	12	51210	12208.8	28601.6	154589	5565.5
H11	12	40285.5	7217.31	22389.7	143372	3076.97
H12	12	43860.3	6653.32	19761.4	137465	3004.67
A1	13	21932.2	4414.06	15396.8	106902	3180.13
A2	13	33264.5	5353.64	18884.9	124983	3263.4
A3	13	30594.6	4874.27	19095.5	117857	2876.99
A4	13	35305.1	5324.87	19084.4	109561	3237.08
A5	13	34987.8	5477.65	20240.7	114057	3118.65
A6	13	52901.4	9579.72	25831.9	132558	5713.46
A7	13	34383.3	5562.23	21312	119205	2957.13
A8	13	179160	28260	74559.5	391993	14908.5
A9	13	46281.8	6959.73	22720.4	129742	3461.27
A10	13	34613.9	6234.48	22144	135999	3447.06
A11	13	36200.1	5735.16	21002.4	142763	2642.46
A12	13	39217.3	5950.43	19722.9	141334	3517.71
B1	13	38901.9	6320.85	20524	137264	4547.32
B2	13	38921.9	6276.5	20932.2	129266	3771.32
B3	13	32305.9	5526.01	22994.6	133361	2716.29
B4	13	30302.2	4932.91	20034.3	112634	3273.99
B5	13	33003.6	5005.83	24385.5	139032	3771.03
B6	13	25327.6	3910.86	21984.4	120057	1948.38
B7	13	29200.4	4931.07	22400.8	120819	2606.12
B8	13	107979	15406.7	67821.9	377569	9431.74
B9	13	36711.3	5902.23	21901.1	120516	3069.78
B10	13	41240.7	6608.27	22602.5	131639	3073.42
B11	13	42689.1	6913.17	23015.4	143226	3520.65
B12	13	45526.7	8252.12	21584.9	140446	5093.89
C1	13	41673.1	6659.09	21965.4	140176	4439.9
C2	13	43379.6	6843.02	29059.7	180970	5015.05
C3	13	36136.8	4824.71	22331.3	128520	3250.07
C4	13	31032.6	4834.25	21864.3	118109	2928.34
C5	13	33459	5290.77	24696.9	127545	3202.74
C6	13	30527.3	5032	24515.8	126015	2560.11
C7	13	29288.3	4856.64	23507	121014	2248.47
C8	13	33303	5216.61	22834.7	117553	3013.71
C9	13	35097	6999.83	22626	116983	2783.16
C10	13	34731.3	6343.77	24174.9	135973	2901.93
C11	13	32984	5677.61	23810.8	145948	3277.92
C12	13	43616.8	7026.85	22231.5	143968	3188.83
D1	13	46331.5	7773.98	23422	145407	3841.36
D2	13	34318.1	5531.66	23232	138088	3391.17
D3	13	37597.9	6588.35	24580	132706	3989
D4	13	31333.8	5588.25	23645.4	123234	3878.58
D5	13	38001.7	6337.02	26182.4	130814	3039.71
D6	13	40798.3	7068.66	26262.8	126696	4096.01
D7	13	27870.4	4871.62	24177.8	120383	2178.38
D8	13	29089.6	6172.05	24672.8	123434	2908.01
D9	13	39152.8	7326.92	22923	118259	3579.22
D10	13	44879.9	8071.49	26356.3	136902	3866.52
D11	13	43370.6	8587.9	24193	133497	3474.85
D12	13	154209	19483.3	28845.5	145269	7845.29
E1	13	46411.8	6977.81	22463	142301	4384.23
E2	13	44837.6	7240.51	23518.1	134980	4217.57
E3	13	67481.2	7593.72	24766.8	131691	5108.55
E4	13	35443.3	6062.78	25024	131849	3173.02
E5	13	30117.1	5190.01	25712.4	132658	3006.2
E6	13	32484	5530.82	27673	139720	3501.91
E7	13	38812.3	6775.77	25207.5	120683	4918.06
E8	13	34704.4	6226.13	24386.2	119724	4408.86
E9	13	35695.7	8119.02	26788.8	120793	2942.67
E10	13	36130.4	6346.9	24081.4	132670	3888.21
E11	13	39309.6	6725.18	22603.6	128051	4674.96
E12	13	59960.8	10102.2	23326.2	135604	6046.94
F1	13	47639.5	8363.24	25296.6	157023	8035.43
F2	13	49446.4	7901.35	24332.2	143313	3988.59
F3	13	35586.6	5953.02	23997.5	136646	5809.53
F4	13	36343.8	6072.46	23990.8	127756	3501.21
F5	13	29728.9	4839.91	25309.1	132177	2794.75
F6	13	65533.4	12139.7	32364.6	147926	7733.9
F7	13	30794.9	5132.6	24384.7	125869	3471.76
F8	13	30055.6	5075.32	23846.9	124233	2360.29
F9	13	31971	5394.28	21661.2	117362	3354.67
F10	13	38009.6	6348.13	24972.8	141401	3987.95
F11	13	30346.1	4776.92	20282.4	122426	2646.59
F12	13	52965.5	9065.17	21760.2	128395	5391.06
G1	13	42988.7	6803.33	22059.9	146587	3814.88
G2	13	52234.5	8671.62	24962.8	150652	3335.45
G3	13	37608.4	6643.36	20394	115222	3319.17
G4	13	29123.9	4781.65	21771	123705	2367.8
G5	13	29250.7	4906.6	23097.7	126786	2743.62
G6	13	31279	5420.33	26212.5	141530	2573.74
G7	13	28622.2	5358.15	22587.3	121833	2650.36
G8	13	38773.6	6346.43	23346.1	123480	3806.17
G9	13	35765.5	5808.69	20774.7	115076	2595.61
G10	13	47508.7	9061.05	25858.7	141342	3571.45
G11	13	72741.4	12045.4	23554.6	125007	7102.34
G12	13	43164.2	6692.62	20294.2	133702	3388.96
H1	13	61421.3	10685.5	24305.8	155463	7525.1
H2	13	46767.3	7882.72	23599.4	150949	4005.81
H3	13	40570.8	7141.65	23916.5	141332	5050.24
H4	13	37089.7	7054.04	23882.9	134599	3112.32
H5	13	33829.1	5861.02	23961.6	135968	2435.13
H6	13	42424.7	7448.33	27621.9	148713	3787.87
H7	13	35070.5	9407.05	27380.9	142706	2605.1
H8	13	35292	6378.23	22034.7	122591	2514.04
H9	13	35486.7	6067.18	22005.2	126680	2412.34
H10	13	51213	12290.4	28436.5	153929	5369.29
H11	13	40100.9	7501.27	22421.4	143037	3250.67
H12	13	43845.4	6829.5	19952.9	136731	2579.67
A1	14	21990.4	4497.79	15225.4	106758	2939.38
A2	14	32861.6	5089.68	18831.3	125357	3008.75
A3	14	30679.3	4901.27	19133.8	117862	2748.2
A4	14	34939.1	5586.45	19085.5	108743	2791.54
A5	14	34863.8	5612.51	20139.2	113797	3041.06
A6	14	52692.2	9260.81	25810.4	132502	5655.92
A7	14	34288	5584.37	21438.3	119081	2973.19
A8	14	177696	27545.7	73845.4	391546	14681.7
A9	14	46017	6870.24	22795.8	129752	3270.4
A10	14	35037.5	5925.48	22089.2	136202	3721.14
A11	14	36107.1	5745.94	20922.5	142174	2863.15
A12	14	39417.9	5940.02	19553.2	141049	3314.38
B1	14	39031.4	6456.44	20695.1	137237	4513.48
B2	14	38897.3	6325.57	20954.8	129012	3557.6
B3	14	32619.3	5602.67	22946.6	133485	2807.15
B4	14	30426.2	4718.78	20233.9	112734	2391.87
B5	14	32785.7	5005.83	24332.5	138905	4018.41
B6	14	26009.4	4051.79	21990.1	119752	2036.32
B7	14	29098.1	4838.41	22497.7	121011	2520.02
B8	14	108886	15347.4	67866.9	378429	8332.19
B9	14	36846.4	5805.46	21859.9	120294	2835.84
B10	14	41350.9	6501.6	22797.2	131500	2769.34
B11	14	42430.7	6680.86	23100.4	143362	3417.88
B12	14	45734.4	8046.22	21558.7	140133	5397.5
C1	14	41643	6981.8	21937.8	139637	4194.3
C2	14	43511.7	6878.76	28988.6	180598	5375.7
C3	14	36469.4	4824.71	22265.1	128429	2623.45
C4	14	31181.8	5012.06	21910.9	118274	2942.37
C5	14	33294.1	5687.04	24781.6	127880	3173.65
C6	14	30650	4898.27	24438	126040	2431.37
C7	14	29211.1	5045.6	23489.4	121176	2030.8
C8	14	32920	5177.66	22888.2	117426	2890.58
C9	14	35011.2	7188.54	22645.9	117352	2760.66
C10	14	34957.7	6593.33	24070	135910	2660.27
C11	14	33024.9	5739.92	23686.6	146106	3169.69
C12	14	43691.2	7233.52	22235	143750	3186.46
D1	14	45964	7650.7	23447.9	145440	3981.78
D2	14	34332	5399.19	23206.2	138116	2904.22
D3	14	37336.7	6517.76	24626.6	132544	4167.01
D4	14	31348.3	5350.98	23723.8	123034	4109.1
D5	14	38064.1	6383.32	26106.7	130633	3071.67
D6	14	40881.6	6962.4	26175.1	127157	4562.74
D7	14	27868	4754.19	24108.4	120114	2284.98
D8	14	29058	6403.76	24806	123776	2754.17
D9	14	38909	7379.08	22921.2	118505	3679.65
D10	14	44843.8	8082.74	26282.5	136808	4143.25
D11	14	43823.6	8443.78	24222.9	133248	3276.77
D12	14	153384	19474.5	28562.6	144628	7436.87
E1	14	46820.2	6792.88	22393.2	142330	4428.29
E2	14	44444.1	7230.76	23542.3	134359	4221.74
E3	14	66981.8	7621.6	24548.5	132249	5084.09
E4	14	35398.5	6096.58	25226.6	131781	3252.84
E5	14	30250	5063.51	25937.3	132511	3297.46
E6	14	32678.4	5592.13	27790.4	140148	3679.75
E7	14	38585.2	7182.06	25224.5	120675	4574.42
E8	14	34752.6	6362.41	24359.8	120009	4243.79
E9	14	35966.7	8222.08	26983.9	120390	2795.86
E10	14	35892.8	6270.5	24169.9	133059	3661.44
E11	14	39193.1	6775.29	22615.1	128325	4701.73
E12	14	59584.1	10004.4	23222.1	135373	5763.41
F1	14	47725.6	8501.89	25318.8	156824	7984.39
F2	14	49441.2	7704.21	24312	144004	3632.96
F3	14	35442.2	6083.64	23860.2	136796	5740.16
F4	14	36262.2	6058.22	24048.8	127560	3664.7
F5	14	29870.8	4935.46	25128.7	132473	2709.11
F6	14	65144.2	12254.5	32410.5	147917	7836.73
F7	14	30807.8	5083.49	24462.9	125886	3268.12
F8	14	29869.8	4738.17	23671.6	124346	2389.16
F9	14	31940.9	5221.28	21743.1	117819	3475.48
F10	14	37929.1	6257.18	24860.6	141129	4038.62
F11	14	30647	4908.71	20295.2	122015	2657.53
F12	14	53247.6	9262.5	21625.1	128327	5453.13
G1	14	44148.1	6901.97	22105.3	146871	3874.16
G2	14	53003.5	8610.11	25013.6	150444	4049.8
G3	14	38361.6	6696.08	20348	115637	3100.43
G4	14	29152.8	4878.48	21635.4	123865	2486.24
G5	14	29610.8	4977.83	23161.5	126706	2655.27
G6	14	31246.4	5380	26232.3	141429	2461.32
G7	14	28992.4	5212.62	22616.4	121798	2618.2
G8	14	38771.3	6456.98	23462.6	123257	3809.57
G9	14	35598.6	5699.85	20869.3	115259	2562.32
G10	14	48339.2	9040.46	25803.2	141331	3237.2
G11	14	72535.1	12160.3	23572.1	124525	7009.72
G12	14	43861	6884.32	20272.6	133627	2995.43
H1	14	61785.7	10447	24534.3	155567	8052.09
H2	14	47089.5	7965.56	23742.1	151183	3907.82
H3	14	40795.1	7255.94	23954.5	141450	4996.36
H4	14	37489.3	6954.26	23902.9	134888	2921.5
H5	14	33965.9	5947.72	24076.3	136371	2709.12
H6	14	42615	7397.26	27594.1	148488	3988.24
H7	14	35167.1	9457.39	27298.4	142101	2405.87
H8	14	35591.6	6296.42	21895.8	122796	2487.6
H9	14	35622.8	6210.01	22007.8	126477	2666.09
H10	14	51674.3	12282.3	28432.6	153992	5499.76
H11	14	40565.3	7379.41	22518.9	143247	2974.33
H12	14	44167.7	6675.53	19640.6	136449	2962.31
A1	15	21868.3	3903.33	15407.8	106905	3020.11
A2	15	33181.6	5162.55	18786.9	124929	3162.37
A3	15	31078.4	5088.85	19074.9	117401	2780.71
A4	15	34849.5	5425.12	19031.9	108802	2919.29
A5	15	34932.5	5546.62	20289.4	113648	3330.82
A6	15	52451.2	9569.3	25800.8	132459	5661.15
A7	15	34406.8	5551.64	21313	118833	3264.18
A8	15	177405	27702.2	74078.6	391373	14666.4
A9	15	46225.4	7005.49	22633.9	129480	3500.83
A10	15	34507.7	6315.13	22024.2	135723	3660.36
A11	15	36389.1	5671.7	20938.7	142357	2798.1
A12	15	39583.9	6172.14	19524	140097	3398.27
B1	15	38151.5	6019.77	20622.3	136636	4022.89
B2	15	38964.5	6275.01	20860	129300	3530.23
B3	15	32364.8	5168.26	22902.5	133111	3032.52
B4	15	30340.8	4605.48	19962	112902	2680.88
B5	15	32565.5	5120.04	24240.7	138622	3834.99
B6	15	25383.1	3748.25	22051.9	120035	2104.32
B7	15	29318.1	4820.93	22355.5	120832	2528.9
B8	15	108542	15636	67534.8	377220	8594.86
B9	15	36804.2	6003.57	21739.3	119913	2965.7
B10	15	40956.3	6482.84	22673	131208	2739.72
B11	15	42117.2	6587.47	23016.5	142738	3610.72
B12	15	45551.1	7838.87	21383.2	140700	5528.22
C1	15	41456.4	6929.04	21923.9	139821	4198.78
C2	15	43402	6950.23	28892.1	180666	4700.33
C3	15	36211	4884.84	22478.7	128663	3049.82
C4	15	31128.9	5242.67	21858.8	118522	2671.35
C5	15	33775.1	5533.87	24758.9	127820	3042.25
C6	15	30410.2	5035.32	24414.4	126076	2229.19
C7	15	29204.2	5171.84	23570.4	121136	1960.71
C8	15	33085.5	5156.88	22793.9	117816	2629.02
C9	15	35063	7088.53	22636.9	117369	2577.93
C10	15	34788.6	6500.36	24300.8	136255	2950.66
C11	15	33231.4	5618.59	23778.1	145880	2911.25
C12	15	44204.7	6896.19	22130.1	143415	2725.33
D1	15	46147.2	7575.89	23486.9	145262	3938.5
D2	15	34550	5607.69	23128.9	138373	3057.42
D3	15	37625.4	6609.42	24624.5	132383	3427.57
D4	15	31176	5381.66	23539.4	123204	3497.91
D5	15	38056.2	6057.35	26250.1	130783	3147.56
D6	15	40812.7	6857.86	26339.6	126783	4226.11
D7	15	28061.5	4835.35	24182.4	120044	2501.81
D8	15	29440.1	6445.32	24765.9	123656	3168.14
D9	15	38566.2	7548.82	22877.6	118387	3730.35
D10	15	44960.6	8089.31	26373.6	136490	3859.75
D11	15	44023.6	8384.68	24236.3	133471	3228.81
D12	15	152832	19545.7	28684.7	144437	7322.6
E1	15	46306.1	6857.2	22651.7	142919	4201.73
E2	15	44881	7135.43	23541.3	134075	4336.46
E3	15	66848.9	7539.81	24681	131620	4951.41
E4	15	35267.9	6164.19	25151.4	131861	2932.62
E5	15	30239.5	4897.21	25729.9	132724	3156.56
E6	15	32730.9	5538.59	27905.9	140014	3614.67
E7	15	38462.7	6966.86	25426	120640	4650.15
E8	15	34729.3	6440.02	24395.6	119804	4000.99
E9	15	35844.5	8235.29	26911.3	120385	2853.83
E10	15	36197.7	6456.18	24246.6	132733	3919.43
E11	15	39473.9	7046.07	22689.8	127922	4992.3
E12	15	59364.4	10096.3	23344.9	135449	5675.53
F1	15	48004.6	8617.67	25074.1	156700	8691.23
F2	15	49965.7	7878.28	24374.6	143832	3610.48
F3	15	36194.8	6123.9	24043.5	136770	5841.97
F4	15	36282	5861.33	24083.7	127560	3722.1
F5	15	30010.4	4718.45	25005.6	132269	2476.78
F6	15	64768.8	12169.1	32182.3	147177	7727.52
F7	15	30799.9	5184.04	24446	126048	3396.73
F8	15	29904.3	4856.29	23874.3	124332	2172.26
F9	15	31885.2	5506.12	21686	117660	3238.11
F10	15	38712.2	6578.46	24960.8	141390	4084.92
F11	15	31086.6	5030.45	20194.3	122084	2418.74
F12	15	53787.2	9127.8	21660.3	128570	5333.97
G1	15	44772.4	6792.05	22031.4	146746	3901.23
G2	15	53620	8864.43	25041.3	150326	3920.72
G3	15	39123.9	6911.46	20423.2	115140	3174.82
G4	15	29567	4948.68	21856	123796	2500.94
G5	15	29508.2	4931.38	23055.7	126353	2692.34
G6	15	31195.1	5322.38	26223.5	141410	2519.39
G7	15	28778.6	5321.96	22759.7	121916	2498.2
G8	15	38839.7	6453.7	23473.4	123366	3758.69
G9	15	35469.7	5785.55	20777.3	115368	2415.15
G10	15	49279.5	9051.2	25874.8	140977	3365.41
G11	15	72851.4	12192.9	23626.5	125054	7043.5
G12	15	44585.9	6907.37	20449.1	133621	3335.35
H1	15	62516.3	10520	24277.4	155255	8030.39
H2	15	47639.9	8416.73	23609.9	151370	3625.4
H3	15	41213.4	7553.1	23838.5	141311	5155.93
H4	15	37788.3	7084.55	23949.2	134693	2953.98
H5	15	34510.9	6221.4	24125.2	136457	2643.06
H6	15	42617.2	7386.59	27379.5	147912	3793.99
H7	15	35934.7	9501.43	27444.7	142312	2582.08
H8	15	35736.4	6362.15	21950.6	122658	2438.29
H9	15	36004.8	6303.77	21938.8	126653	2664.34
H10	15	52248.3	12434.5	28454.1	153757	5178.06
H11	15	41058.7	7856.5	22453.2	143331	3169.46
H12	15	44684.9	7220.35	19749.2	135864	2929.84
A1	16	21719.9	4447.55	15175.1	106623	2897.58
A2	16	33465.9	4908.31	18707.2	124905	3156.84
A3	16	30664.7	4790.43	18936.8	117482	2536.9
A4	16	35210.4	5306.43	18787.7	109085	2823.21
A5	16	34782.6	5531.18	20344.3	113819	3254.2
A6	16	52030.7	9393.17	25616	132407	5288.69
A7	16	34350.1	5479.44	21416.8	119205	3234.89
A8	16	178008	27983.9	74040.7	391019	14488.6
A9	16	46279.5	6927.19	22695	129399	3588.84
A10	16	35163.3	6061.8	22322.1	135791	3636.04
A11	16	36520.7	5826.16	20952.6	142182	3091.97
A12	16	39797.3	6252.49	19567.1	140198	3507.75
B1	16	38706.6	6334.81	20225.5	137122	3726.84
B2	16	39248.3	6237.84	20984.6	129472	3306.09
B3	16	32299.1	5457.01	22907.5	133645	2737.53
B4	16	30037.7	4832.07	20088.2	112596	2927.83
B5	16	33094.9	4925.02	24286.6	138424	3489.86
B6	16	25624.2	3975.91	22161.6	120002	1957.44
B7	16	29080.9	4804.32	22532.2	121102	2753.47
B8	16	108495	15398.6	68311.7	377921	9724.96
B9	16	36607.9	5946.05	21860.9	120231	2720.71
B10	16	41016.1	6819.62	22635.3	130771	2776.25
B11	16	42590.6	6634.16	23080.9	143222	3804.7
B12	16	45586.8	7851.83	21513.1	140208	4953.33
C1	16	41380.1	6843.15	21875.6	139660	4494.85
C2	16	43100	6284.82	28717.8	180345	4310.76
C3	16	36308.3	4495.12	22269.8	128292	2982.32
C4	16	30787.2	5010.98	21966.2	118657	2722.1
C5	16	33816.6	5288.8	24769.2	127299	3251.89
C6	16	30492.8	5010.4	24517.5	126738	2314.73
C7	16	29363.9	4843.94	23507	121229	2058.83
C8	16	33095.7	5156.88	22929.9	117438	2612.84
C9	16	35036.7	7281.6	22587.1	117329	2820.06
C10	16	34816.3	6258.63	24095	135873	2732.86
C11	16	33120.2	5668.87	23755.2	145521	3504.32
C12	16	43841.4	6809.49	21935.4	143398	3148.53
D1	16	46349.1	7799.27	23444.9	145475	3754.8
D2	16	34358.7	5313.95	23088.6	138928	3025.68
D3	16	37277.8	6387.1	24710.1	132633	3655.09
D4	16	31127.9	5523.82	23521.4	123803	3790.81
D5	16	38272.4	6328.52	26047	130676	3110.61
D6	16	40834.4	6820.71	26108.3	126735	4184.26
D7	16	27719.4	4848.31	24271.9	120420	2392.49
D8	16	29309.7	6580.63	24729.6	123633	2997.51
D9	16	39083.7	7508.15	22999.1	118882	3893.91
D10	16	45208.2	8145.57	26232.7	136446	3851.04
D11	16	43966.4	8571.31	24225	133341	3338.28
D12	16	152808	19460.8	28388.6	144548	7409.05
E1	16	46882.6	6704.44	22549.2	142382	4139.85
E2	16	44883.1	7555.74	23415.8	134578	4305.17
E3	16	66539.5	7511.93	24625.9	131631	5328.74
E4	16	35245.1	6140.17	25262.4	132213	3566.48
E5	16	30124.4	5079.44	25815.6	132937	2984.45
E6	16	32472.2	5601.63	27800.4	140542	3192.97
E7	16	38782.3	7285.64	25240.5	120818	4829.08
E8	16	34529.7	6583.51	24502.2	119847	3942.45
E9	16	36095.6	8222.96	27013.8	120679	2732.27
E10	16	36832.7	6403.76	24071.5	132804	3654.09
E11	16	40032.5	6969.94	22564.4	127628	4636.73
E12	16	59568.6	9975.1	23281.5	135435	5628.28
F1	16	48920.2	8966.44	25118.6	156895	8090.29
F2	16	50377.4	7820.61	24324.1	143923	3851.65
F3	16	36849	6064.85	23822.1	136684	5746.46
F4	16	36263	6020.52	24052.2	127630	3226.4
F5	16	29819.5	4799.42	25088.8	132438	2437.78
F6	16	64669	11924.3	32029.7	147370	7409.46
F7	16	30752.4	5125.58	24569.3	126160	3423.12
F8	16	29631.8	4951.72	23630.5	124655	2496.37
F9	16	31968.8	5308.99	21743.1	117699	3429.54
F10	16	39723.3	6511.31	24970.2	141213	4157.42
F11	16	32185	4844.32	20096.3	122347	2471.47
F12	16	54475.2	9362.88	21770	128611	5270.25
G1	16	46857.2	7413.49	21934.1	146656	3996.6
G2	16	55229.7	8878.62	25002.6	150170	3918.53
G3	16	41329.7	7039.6	20472.7	115231	3198.73
G4	16	29254.6	4821.19	21756.5	124129	2518.91
G5	16	29660.2	4770.33	23096.1	126507	2521.95
G6	16	31302.3	5433.29	26291.7	141760	2596.07
G7	16	28940	5421.49	22663.9	122053	2517.81
G8	16	38404.3	6474.18	23430.1	123435	4106.33
G9	16	35674	5742.7	20862.4	115537	2498.37
G10	16	51756.1	9635.99	25873	141116	3383.72
G11	16	74175.6	12346.1	23363	125296	7418.34
G12	16	46914.4	7102.72	20309	133830	3404.93
H1	16	64089.4	10963.1	24291.6	154764	7914.15
H2	16	48629.3	8136.34	23759.7	151658	3513.58
H3	16	41933.7	7620.59	23819	141224	4900
H4	16	38752.8	7174.44	23950.8	134483	2884.97
H5	16	35200.3	6215.37	24112.6	136676	2561.24
H6	16	43618.4	7550.45	27447.1	147592	4006.59
H7	16	37086.4	9662.66	27425.2	142367	2347.93
H8	16	36834	6492.9	21936.8	122682	2593.36
H9	16	36519.4	6337.95	22088	126504	2784.21
H10	16	53552.9	12459.6	28510.7	153707	5405.15
H11	16	42921.1	7881.79	22503.5	142813	2923.57
H12	16	46226.8	7400.97	19726.1	135815	3309.66
A1	17	21330.9	4484.39	15289.9	106323	3436.73
A2	17	33281.4	5136.64	18832.8	125348	3286.93
A3	17	30752.6	5016.38	19099.6	117733	2634.42
A4	17	35124.7	5324.87	18817.4	109199	2882.33
A5	17	34825.4	5632.07	20295.6	113911	3119.64
A6	17	52280.6	9551.58	25749.2	132064	5546.06
A7	17	34436.8	5697	21443.2	119335	3013.81
A8	17	177047	27557	73842.5	392184	14516.2
A9	17	46402.7	6927.19	22736.7	129540	3561.15
A10	17	35162	6307.18	21985.1	135772	3538.79
A11	17	36307.5	5908.77	20909.8	142084	2999.04
A12	17	39346.8	6133.45	19597.7	140182	3015.79
B1	17	38656.2	5914.09	20274.7	136460	4731.71
B2	17	39064.6	6327.06	21087.9	129581	2793.95
B3	17	32180	5348.41	22979.5	133380	3189.46
B4	17	30478.9	4782.22	20065.3	112850	2911.65
B5	17	33043.2	5151.29	24155.9	138217	3734.83
B6	17	25798.8	3968.68	21983.5	120386	2044.48
B7	17	29197.7	4809.56	22477.8	120855	2403.74
B8	17	108786	15207.1	67985.1	377860	9492.83
B9	17	36822.4	5996.26	21815	120127	2804.52
B10	17	41212.9	6522.34	22610.4	131054	3046.77
B11	17	41997	6622.49	23072.8	142732	3634.96
B12	17	45500.7	7563.85	21683	140192	5345.5
C1	17	41395.1	6781.79	21791.5	139491	4133.74
C2	17	43703.9	6507.76	28919.2	180949	4582.95
C3	17	36760.2	4653.56	22175.8	128168	2883.32
C4	17	31195.5	4646.74	22052.7	119274	3259.83
C5	17	33325	5329.31	24889	127625	3504.66
C6	17	30351.7	4750.41	24547.2	126650	2307.82
C7	17	29471.1	4914.6	23431	121291	1875.79
C8	17	33106	5130.91	22824.7	117330	2616.44
C9	17	35212.4	7169.41	22597.1	117419	2783.16
C10	17	34972.5	6747.96	24227.9	135889	2586.67
C11	17	33147.4	5690.73	23748.7	145838	3259.14
C12	17	43779.8	6884.31	21905.4	143079	3146.16
D1	17	46367.9	7551.65	23511.9	145748	3914.45
D2	17	34372.6	5485.59	23093	138904	3350.69
D3	17	37491.2	6693.71	24619.2	132330	3832.05
D4	17	31391.6	5613.82	23612.5	123698	3986.44
D5	17	38209.1	6072.47	26057	130929	3101.63
D6	17	40575.8	7052.24	26210.7	126517	4269.78
D7	17	27662.4	4896.66	24241.8	120677	2268.58
D8	17	29461.7	6520.5	24952.3	123473	2739.25
D9	17	38825.9	7425.94	22861.8	118589	3726.52
D10	17	45996.3	8213.09	26319	136469	4044.56
D11	17	45006.8	9003.66	24363.1	133395	3558.26
D12	17	153130	19571	28556	144302	7425.94
E1	17	46361.4	7070.84	22602.6	142911	4311.86
E2	17	44934.9	7382.42	23473.8	134582	3927.64
E3	17	66542.2	7657.85	24499.1	131453	4756.63
E4	17	35360.1	6098.36	25231.2	131867	3077.24
E5	17	30030.4	5061.74	25752.9	133079	2864.36
E6	17	32452.6	5825.28	27959.6	140742	3387.32
E7	17	38734.5	6964.18	25346	120980	4601.87
E8	17	34462.3	6309.16	24570	120031	3953.96
E9	17	35980.8	8166.58	27017.4	120390	2870.66
E10	17	37558.6	6497.93	24066	133103	3526.48
E11	17	40868.9	6988.25	22670.6	128027	4602.32
E12	17	60012.5	10137.3	23189.5	135328	5486.51
F1	17	50696.6	8806.35	25282.2	156953	8094.12
F2	17	52229.9	8203.35	24283.7	143886	3958.96
F3	17	38507.2	6252.73	23943.4	136635	5642.85
F4	17	35959.3	6124.41	24064.1	127736	3271.62
F5	17	29953.1	4881.21	25127	132299	2477.63
F6	17	64425.9	11735.4	32165.2	147454	7615.92
F7	17	30764.7	5107.66	24481.4	126253	3024.91
F8	17	29930.7	4992.4	23735.4	124387	2400.7
F9	17	32139.7	5419.22	21763.8	117979	3305.32
F10	17	42272.2	6934.58	24841.7	141604	4156.55
F11	17	34294	5196.46	20229.9	121998	2510.28
F12	17	56174.6	9510.45	21749.6	128193	5357.97
G1	17	49567.9	7712.22	21718.7	146444	3954.07
G2	17	59066.6	9395.54	24961.7	150274	3452.51
G3	17	44707.6	7494.01	20294.1	115035	3221.75
G4	17	29459.7	4899.46	21903.3	123912	2272.24
G5	17	29585.7	4835.37	23078.2	126570	2660.79
G6	17	31502.8	5531.96	26177.3	141806	2707
G7	17	28822.5	5358.91	22583.5	122170	2822.14
G8	17	38628.5	6537.23	23446	123366	3654.4
G9	17	35582.5	5889.25	20740.3	115671	2473.84
G10	17	56307.4	10035.4	25802.3	141085	3211.56
G11	17	76434.8	12692.9	23554.6	125397	7350.78
G12	17	50049.3	7566.2	20257.8	134003	2840.29
H1	17	65780.1	10874.2	24190.8	154666	8048.99
H2	17	51249.8	8706.04	23748	151976	3930.88
H3	17	44556.9	7977.62	23851.9	141416	5326.9
H4	17	39650	7373.18	23946	134714	3014.88
H5	17	36868.1	6456.62	24081.5	136788	2883.27
H6	17	45026.5	7575.6	27543.9	147468	3966.83
H7	17	39049.8	9889.95	27437.7	142664	2617.01
H8	17	38639	6722.24	21829.8	122693	2530.48
H9	17	38426.1	6585.05	22092.3	126362	2541.84
H10	17	56081.7	12960.3	28467.7	153825	5754.73
H11	17	45611.1	8020.9	22456.5	142548	2977.71
H12	17	49156.9	7602.32	19743.8	135268	2946.78
A1	18	21992.3	4092.55	15135.8	106309	3379.06
A2	18	32920	5264.57	18638.2	125431	3107.01
A3	18	30751	5144.27	18973.7	117694	2679.44
A4	18	34667.7	5495.41	18955.5	108943	2927.73
A5	18	34638.2	5505.45	20328.8	113928	3194.29
A6	18	51609.2	9136.79	25611.7	132066	5413.19
A7	18	34300.8	5766.32	21424.6	119465	2936.34
A8	18	176427	28396.6	73731.8	390956	14939.2
A9	18	46117.2	6954.65	22721.4	129101	3458.3
A10	18	35559.4	6136.78	22063.4	135841	3402.85
A11	18	36492.1	6048.86	21008.1	141437	2902.64
A12	18	39465.4	6413.19	19373.8	139720	3705.39
B1	18	38129.6	6069.61	20502.2	136820	3841.87
B2	18	38826.8	6466.83	20721.3	130142	3312.61
B3	18	32782.2	5651.22	22968.1	132982	2875.59
B4	18	30229.6	4913.65	20183.4	112738	2605.39
B5	18	32715.2	4993.98	24210.1	139059	3516.41
B6	18	25582.6	4011.14	22044.4	120509	2075.31
B7	18	29083.6	4888.24	22540.3	121284	2468.54
B8	18	109004	15716.9	67988	377358	9517.26
B9	18	36828.2	5935.09	21898.3	120100	2928.86
B10	18	41588.3	6546.04	22596.5	130865	2720.96
B11	18	42686.6	6827.95	23079.7	143055	3960.59
B12	18	46622.2	8102.37	21363.8	140323	5181.04
C1	18	41163.4	6796.52	21743.1	139416	4160.65
C2	18	42868.4	6676.24	29161.2	180871	5113.72
C3	18	36664	4722.94	22399.8	128229	3232.07
C4	18	31063.3	4673.68	21793.4	119276	2982.32
C5	18	33820.4	5622.81	24850.8	127602	3066.32
C6	18	30769.5	5022.03	24617.9	126736	2463.34
C7	18	29492.7	4989.23	23534.5	121579	1824.67
C8	18	33240.7	4918.82	22806.6	117879	2708.12
C9	18	35084.2	7396.39	22701.1	117527	2902.87
C10	18	35237.4	6826.26	24348.8	136254	2739.83
C11	18	33637.8	5888.58	23714.9	145693	3200.61
C12	18	44244.5	6892.63	22086.3	143089	3130.75
D1	18	46746.5	7492.65	23430	145388	3704.78
D2	18	34343.6	5710.22	23285.7	139170	3030.06
D3	18	37519.7	6441.89	24661.5	132165	3755.16
D4	18	31317.5	5502.34	23712.1	123926	4202.15
D5	18	38556.4	6194.35	26261	130893	3448.14
D6	18	40546.2	6998.68	26042.5	126623	4600.95
D7	18	27960.3	5018.41	24023.5	120853	2327.8
D8	18	29495.8	6381.65	24883.3	123525	2972.34
D9	18	38391.5	7197.85	23117.9	118879	3971.38
D10	18	47820.1	8561.01	26287.3	136445	4171.31
D11	18	46692.6	8946.63	24315.7	133596	3510.3
D12	18	153893	19394.5	28542.8	144499	7360.36
E1	18	46535.5	6952.54	22679	143094	4569.88
E2	18	44851.4	7216.68	23450.6	134470	4359.41
E3	18	66616.2	7492.41	24612.9	131742	4864.84
E4	18	35617.1	5883.11	25222.9	132244	2947.65
E5	18	30048.2	5303.24	25846	132912	3218.97
E6	18	32785.7	5714.75	28015.1	141246	3716.42
E7	18	38857.8	7113.3	25483.5	120912	4855.58
E8	18	34622	6354.28	24441.8	119732	4045.14
E9	18	35964.2	8041.5	26924.9	120509	2865.99
E10	18	39372	6832.87	24200.6	132856	3771.61
E11	18	42265.8	7117.38	22618.9	127924	4387.26
E12	18	61153.6	10364.6	23161.9	135499	5563.61
F1	18	54092.1	9816.91	25182.7	157006	7846.6
F2	18	55004	8639.58	24306.9	144403	3936.47
F3	18	41267.8	6659.8	24008.1	136922	5404.99
F4	18	36211.4	6045.65	23947.4	127607	3402.07
F5	18	29899.5	4896.59	25026.4	132182	2647.22
F6	18	63666.1	11712	32028.9	147150	7302.65
F7	18	31032.2	5120.91	24590.3	126637	3351.39
F8	18	29826.4	4935.3	23593.3	124775	2135.15
F9	18	32024.5	5355.66	21816	117975	3381.89
F10	18	46883.6	7415.64	24864.8	141717	3960.87
F11	18	37577.8	5676.36	20362.5	122116	2558.03
F12	18	60053.5	10214	21646.4	128322	5305.01
G1	18	55816.7	8363.25	21947	146270	3946.34
G2	18	65272.8	10049.7	24830.2	150306	3790.54
G3	18	51300.8	8377.36	20538.1	115255	3404.18
G4	18	29650	4813.93	21771.8	124208	2403.74
G5	18	29707.5	5054.49	23044.8	126283	2689.19
G6	18	31408.9	5320.94	26288	141800	2557.36
G7	18	29189.1	5316.68	22670.8	122375	2512.31
G8	18	38936.4	6409.48	23268.7	123011	3586.57
G9	18	35433.3	5819.83	20914	116173	2411.64
G10	18	64388.8	10994.5	25699.3	141072	3332.44
G11	18	81314.7	13443	23584	125473	7234.19
G12	18	57493.4	8551.41	20209.9	133872	2790.1
H1	18	70626.5	11724.9	24245.9	154878	8092.39
H2	18	55553.7	9311.42	23915.2	151925	4095.72
H3	18	48811.4	8460.91	24042.8	141520	5462.64
H4	18	42569.4	7726.13	23973.9	134505	2977.53
H5	18	39341.3	6741.61	24197.7	136574	2878.77
H6	18	48083.1	7999.35	27323.3	147224	3874.29
H7	18	42621.7	10531.7	27431.4	142475	2592.4
H8	18	41916.4	7103.31	21965.9	122684	2438.29
H9	18	41495.5	6970.6	22072.5	126359	2563.71
H10	18	60097	13583.9	28413	153820	5506.73
H11	18	50689.5	9091.2	22234.3	142511	2958.53
H12	18	54912.9	8518.74	19500.7	135291	3004.67
A1	19	21702.9	4280.1	15096.5	105978	3281.04
A2	19	33296.5	4939.08	18791.5	125375	3073.8
A3	19	30659.8	4980.85	19180.3	117373	2879.49
A4	19	34969.8	5515	19015.9	109200	2980.52
A5	19	34575.1	5474.56	20350.5	113746	3329.84
A6	19	52193.6	8961.71	25755.6	132544	5583.73
A7	19	34292.2	5516.02	21428.5	119241	3142.3
A8	19	177140	27394.8	74087.3	391385	14298.6
A9	19	46262.3	7148.88	22828.3	129503	3242.71
A10	19	37066.2	6415.1	22188.8	135829	3663.67
A11	19	38176.9	6077.6	20870.5	141607	2981.62
A12	19	41477.3	6276.3	19665.9	139577	3074.08
B1	19	38873.4	6308.89	20493.1	136142	3831.72
B2	19	38585.7	6144.16	21000.1	129652	3496.35
B3	19	33281.8	5589.89	22831.8	133205	2992.4
B4	19	30521	4812.81	20303.8	112606	2947.24
B5	19	32697.6	4930.41	24316	138220	3243.69
B6	19	25339.7	4021.08	22115.7	120336	1661.88
B7	19	29223	4838.41	22486	121090	2410.84
B8	19	108886	15320.4	67723.4	377332	8393.27
B9	19	37040.8	5971.61	21738.3	119948	2712.42
B10	19	42429.9	6699.13	22741.5	130530	2954.95
B11	19	43364.7	6902.66	23078.6	142648	3797.78
B12	19	47135	7964.14	21449.5	140133	5380.64
C1	19	41495.3	6743.76	21805.3	139455	4426.44
C2	19	43534.1	6797.07	29234	180755	4542.12
C3	19	36051.1	4689.4	22382.4	128743	3007.07
C4	19	31136.3	4704.93	21780.1	119330	2493.19
C5	19	33610.3	5545.73	24771.3	127780	3071.34
C6	19	30625.9	4987.98	24660.7	127046	2312.14
C7	19	29529.7	5095.62	23578.8	121493	2014.31
C8	19	33187.9	5110.13	22867.3	117015	2567.9
C9	19	35191.2	7275.51	22677.6	117616	2617.54
C10	19	36169.7	6694.14	24073	135698	2861.15
C11	19	34037.3	5946.52	23710.6	145318	3208.34
C12	19	44937.8	6975.77	22051.8	143132	2513.13
D1	19	46768.5	7435.75	23501.9	145227	3703.82
D2	19	34778.5	5322.01	23066.2	139214	3025.68
D3	19	37622.3	6586.24	24471.1	132450	4083.8
D4	19	31514.7	5710.98	23627.3	123908	3750.63
D5	19	38594.2	6568.51	26185.4	130476	3217.46
D6	19	40441.3	6942.53	26169.6	126623	4596.41
D7	19	27933	4664.39	24169.6	121011	2267.67
D8	19	29534	6498.39	24897.3	123588	2529.47
D9	19	38445.7	7244.71	22886.8	118825	4000.08
D10	19	50420.9	8634.16	26112	136334	3931.35
D11	19	49513	9206.87	24344.5	133196	3436.28
D12	19	155933	20078.1	28381	143720	7310.67
E1	19	47145.6	6946.79	22451	142941	4339.13
E2	19	45368.7	7524.32	23338.9	134344	4131.01
E3	19	66981.8	7595.58	24674.4	131728	4769.8
E4	19	35333.2	5991.62	25055.2	132441	3233.12
E5	19	30254.1	5325.36	25993.5	133059	2989.18
E6	19	33090.6	5712.16	27969.6	141002	3980.44
E7	19	38874.8	7064.19	25511.7	120989	4883.04
E8	19	34617	6519.44	24554	119677	4235.16
E9	19	35840.3	8223.84	26883.2	120180	2882.82
E10	19	42073.8	6884.4	24149.1	132940	3591.66
E11	19	45460.7	7515.36	22524.2	127750	4624.31
E12	19	63938.3	10577	23272.5	135076	5736.88
F1	19	60430.5	10581.6	25118.6	156678	8043.08
F2	19	60847	9377.81	24179.6	144492	3656.47
F3	19	46763.6	7717.28	24048.8	136731	5456.35
F4	19	36592.8	6080.84	24048.8	127236	3537.73
F5	19	30157.6	4943.56	25137	132010	2516.64
F6	19	63571.9	11782.3	31940.1	146789	7157.56
F7	19	31340	5266.66	24592.7	126898	3377.77
F8	19	30084.2	4880.54	23825.9	124571	2578.84
F9	19	32344.6	5415.2	21849.9	118080	3282.35
F10	19	56049.3	8328.46	24912.8	142242	4328.65
F11	19	44431	6757.91	20192.3	122106	2677.43
F12	19	66835.5	10988.7	21698	128424	5160.2
G1	19	66779.1	9959.8	21856.2	146279	4068.77
G2	19	76907.8	11711.6	25046.8	150571	3821.17
G3	19	63139.7	9639.69	20451.5	115292	3144.71
G4	19	29657	4972.08	21870.5	124040	2552.39
G5	19	29939.9	4880.27	23041.7	126010	2805.94
G6	19	31577.4	5696.17	26388.5	141807	2551.4
G7	19	29233.7	5300.85	22667.8	122464	2665.27
G8	19	38732.2	6522.49	23401	123198	3552.66
G9	19	36007.9	5664.72	20999.1	116226	2642.03
G10	19	80368.1	12950.4	25755.7	140772	3412.11
G11	19	90448.8	14518.5	23400	125652	7184.06
G12	19	70893.1	10621.3	20338.6	134208	3160.82
H1	19	79598.5	13011.6	24353.1	154218	7585.55
H2	19	63527.9	10555.3	23848.6	152143	3900.91
H3	19	56399.6	9516.76	23925.8	141358	5389.07
H4	19	47062.8	8236.58	23938.8	134556	2869.54
H5	19	44852.1	7428.43	24040.8	136926	2531.96
H6	19	53761.8	8695.18	27360.8	146806	3802.4
H7	19	49754.2	11457.4	27536.5	142213	2873.39
H8	19	48047.1	7882.94	21977.7	122534	2559.06
H9	19	46782.6	7653.2	22176	126101	3033.58
H10	19	68926.1	14548	28557.6	153580	5389.21
H11	19	60256.3	10438.5	22383.1	142609	2891.99
H12	19	65337.6	10088.1	19662.3	134491	3301.19
A1	20	21898.3	4494.44	15333.9	105455	3172.92
A2	20	33563.8	5071.87	18766.9	125226	3221.88
A3	20	30970.9	4965.22	19002.4	117559	2614.42
A4	20	35393.5	5503.48	18947.5	109396	2988.97
A5	20	34775.8	5362.35	20230.4	113800	3287.6
A6	20	51750	9289.99	25800.8	132555	5391.22
A7	20	34426.1	5780.76	21455.9	119198	2900.44
A8	20	176615	27872.9	73288.8	391105	14663.3
A9	20	46573.2	7025.83	22667.5	129336	3409.84
A10	20	38966.3	6588.92	22091.4	135636	3827.24
A11	20	40487.1	6436.79	20912.1	140894	2824.82
A12	20	43458.2	6761.38	19499	139184	3322.91
B1	20	39123.5	6324.84	20702.4	136703	4280.03
B2	20	38641.5	6173.9	20978.9	130278	3264.39
B3	20	33290	5559.23	22811.6	133320	3359.37
B4	20	30448.5	4817.35	20202.9	113203	2784.4
B5	20	33090.5	5048.93	24417.3	138269	3679.32
B6	20	25695.3	4067.15	22267.5	120779	2065.33
B7	20	29621.4	4848.02	22472.4	121229	2158.75
B8	20	109610	15576.6	68055.5	376080	8301.64
B9	20	37056.1	6118.6	21925.4	119965	2806.36
B10	20	44213.7	6890.73	22500.2	130194	3083.3
B11	20	44586.5	6894.49	23053.3	142379	3730.8
B12	20	48607.1	8685.54	21221.5	140323	5317.38
C1	20	41186	7017.38	21788	139291	4235.79
C2	20	43767.4	6843.02	28973.4	181108	5280.43
C3	20	36786.8	4688.25	22450.8	128329	3115.07
C4	20	31223	4736.18	21934.1	119406	2857.07
C5	20	34004.6	5677.16	24871.4	127350	3344.17
C6	20	30933.8	5099.28	24627.5	127172	2456.43
C7	20	29562.9	5249.65	23599.6	121766	2164.37
C8	20	33617.7	5264.22	22743.1	117348	2951.7
C9	20	35212.4	7256.38	22732.7	117568	2833.57
C10	20	37450.8	6656.95	24203.9	135965	2623.47
C11	20	35389.2	6001.17	23787.9	145419	3190.67
C12	20	46120.2	7039.91	22012.6	142394	3126.01
D1	20	47324.8	7594.85	23592.9	145400	3751.91
D2	20	35153.1	5588.11	23211.8	139580	3007.08
D3	20	38260.5	6760.09	24642.4	132065	4258.65
D4	20	31846.7	5523.82	23648.5	124195	3513.77
D5	20	39084.8	6277.5	26306.8	130288	3064.68
D6	20	40759.1	7026.33	26225.3	126320	4290.71
D7	20	28142.6	4913.06	24148.6	121000	2358.78
D8	20	29616.2	6219.81	24829.3	123743	2937.84
D9	20	38681.1	7463.07	23052	119114	3709.3
D10	20	56212.1	9249.34	26314.2	136223	3643.97
D11	20	55071.3	9987.59	24352.8	133263	3298.66
D12	20	161512	20627.1	28301.6	143574	7172.55
E1	20	47926.3	7076.59	22691	143299	4404.16
E2	20	45932.6	7499.41	23436.9	134393	4552.35
E3	20	67718.4	7668.08	24583	131359	4960.82
E4	20	35431.1	6061.89	25167.9	132328	3475.39
E5	20	30538.6	5121.01	25995.4	133161	3018.5
E6	20	33206.6	5685.39	27826.8	141550	3544.08
E7	20	38772.6	7170.45	25251.8	121123	4770.38
E8	20	34957.2	6494.17	24427.7	119808	4167.02
E9	20	36093.9	8021.24	26978.4	120229	2805.21
E10	20	47826.8	7609.35	24255.6	132856	3680.72
E11	20	51501.3	8222.66	22752.9	127728	4619.53
E12	20	69444	11192.2	23083.8	135088	5550.35
F1	20	72313.3	12078.2	25316.2	156870	7852.98
F2	20	71392.8	10429.6	24419	144231	3480.69
F3	20	56660.8	8368.58	23906.2	136666	5454.54
F4	20	36611.8	6222.43	24127.2	127510	3526.43
F5	20	30282.2	4705.49	25132.8	132152	2568.36
F6	20	63117.5	11548.8	31990.7	146353	7555.34
F7	20	31238.6	5141.17	24545.9	126958	3015.84
F8	20	30105.5	4772.59	23864.6	125072	2244.83
F9	20	32465.1	5363.7	21840.8	118377	3431.24
F10	20	71791.8	10216.2	25052.5	141690	4046.48
F11	20	56432.9	8162.41	20258.6	121673	2464.51
F12	20	79961.7	12720.1	21692.2	128060	5310.8
G1	20	86230.2	13037.4	21928.9	145822	3857.41
G2	20	95974.6	14112.8	24962.8	150283	3393.43
G3	20	81620.3	11949	20489.5	115166	3130.54
G4	20	29995.2	5032.6	21857.6	123960	2414.36
G5	20	30198.9	4891.11	23027.6	125845	2402.05
G6	20	31864.4	5472.19	26280.7	141837	2487.37
G7	20	29497.7	5256.36	22741.3	122818	2348.38
G8	20	38945.6	6506.11	23392.7	123007	3894.35
G9	20	36063	5766.7	20916.6	116406	2609.62
G10	20	105867	15855.5	25802.3	140802	3221.63
G11	20	106194	16131.1	23395.6	125550	6851.72
G12	20	92370.9	13163.2	20171.2	133807	2934.97
H1	20	94995.7	15045.8	24135.6	154486	8056.74
H2	20	78901.8	12490	23881.3	152191	3957.39
H3	20	70284.4	11182.2	23827.2	141389	5107.23
H4	20	56099.8	9304.5	23976.3	134579	2811.89
H5	20	54314.3	8404.01	24172.6	136900	2575.5
H6	20	64093.4	9844.47	27338.3	146896	3999.71
H7	20	63011.5	13109.8	27471.1	142399	2502.71
H8	20	59407.5	9152.71	21965.9	123014	2383.98
H9	20	57645.3	8801.97	22044	125977	2981.96
H10	20	84134.8	16703.9	28447.2	153529	5318.5
H11	20	77920.8	12632	22399.6	142643	3141.26
H12	20	83542.7	12841.8	19601.2	134547	2730.75
A1	21	22014.8	4435.83	15302.4	105799	3595.3
A2	21	33081.9	5180.36	18900.2	124672	3000.45
A3	21	30606	5113.01	19043.5	117509	2588.16
A4	21	35585.4	5675.18	18820.8	109305	2896.06
A5	21	35377.9	5499.27	20258.3	113874	2968.37
A6	21	52023	9286.87	25548.3	132347	5185.12
A7	21	34881.3	5615.18	21415.8	119080	3159.31
A8	21	177137	27821.7	74171.9	391665	14347.6
A9	21	46808.1	7119.39	22717.4	129305	3065.7
A10	21	42844.1	7211.45	21943.6	135639	3725.56
A11	21	44475	7051.02	20986.2	141254	2701.7
A12	21	48259.2	7358.06	19522.6	138776	3213.43
B1	21	39496.5	6376.68	20387.5	136482	4143
B2	21	38984.2	6019.25	20874.1	129897	3551.08
B3	21	33309.2	5713.83	22920.1	132803	3181.2
B4	21	30441.5	4858.13	20113.4	113486	2724.01
B5	21	33134.6	5109.27	24337.2	138269	3927.91
B6	21	25636.2	3883.76	22001.3	120461	1914.83
B7	21	29999.9	4822.67	22494.1	120877	2556.41
B8	21	109920	15309.6	67836	376795	9175.18
B9	21	37498.7	6105.82	21806.6	119658	2786.1
B10	21	47817.6	7313.44	22573.7	130460	2764.4
B11	21	46963.7	7020.56	22909.7	142190	3973.29
B12	21	52589.7	9149.19	21468.9	140149	5221.8
C1	21	41361.3	6625.96	21776.5	138950	4202.15
C2	21	43439.7	6347.79	28716.1	180628	4788.79
C3	21	36672.1	4793.49	22374.2	128615	2741.58
C4	21	31605.9	4881.66	21883.2	119899	3056.83
C5	21	34101.9	5846.14	24889	127473	3482.59
C6	21	31551.2	4996.28	24610.9	126930	2463.34
C7	21	30020.4	5155.96	23719.9	121733	2015.13
C8	21	33802.8	5323.09	22841	117306	2836.65
C9	21	35549.5	7233.77	22621.5	117982	2740.85
C10	21	39927.2	7146.28	24142.9	135546	2910.88
C11	21	38018	6317.08	23832.6	145352	3023.9
C12	21	48859.8	7449.69	21940	142508	3041.84
D1	21	48655.7	7803.48	23562.9	145385	3520.12
D2	21	36675.7	5771.27	23072.9	139459	3245.63
D3	21	39178.2	6814.88	24547.3	132295	4050.09
D4	21	32341.3	5571.89	23752.4	124662	3673.44
D5	21	39407.4	6313.4	26176.4	130753	3026.73
D6	21	40972.8	7090.26	26177.8	126400	4217.92
D7	21	28197.2	4920.84	24356.8	121438	2340.55
D8	21	29544.8	6662	25052.9	123402	3099.14
D9	21	38588.6	7675.24	22983.3	119135	3824.08
D10	21	66924	10534.1	26357.3	136185	3704.93
D11	21	66031.1	11287.8	24423.9	133376	3389.36
D12	21	171847	21931.7	28284.5	143443	7318.62
E1	21	49338.7	7323.54	22476.1	142994	4219.56
E2	21	48026.2	7595.82	23314.6	134403	4342.72
E3	21	68800	7761.02	24697.7	131244	4874.25
E4	21	35856.9	6196.21	25279.8	132503	3092.26
E5	21	30755.8	5310.32	25938.2	133393	3006.2
E6	21	33483.3	5675.89	28041.4	141461	3921.77
E7	21	38950.3	7308.86	25333.7	121071	4473.12
E8	21	35050.4	6509.51	24490.9	119839	3522.1
E9	21	36408.1	8194.77	26869.6	119869	2778.09
E10	21	58696.8	8862.03	24207.8	132828	3525.56
E11	21	62379.4	9490.8	22647.6	127714	4298.37
E12	21	79675.4	12658.4	23272.5	135180	5552.01
F1	21	90901	14608.2	25253.4	156888	7958.88
F2	21	88663.5	12673.6	24368.5	144105	3584.93
F3	21	73107.3	10236.6	24063.9	136827	5407.69
F4	21	36839.3	6030.57	24145.1	127294	3322.06
F5	21	30691.3	4945.99	25163.6	132327	2691.31
F6	21	63171.5	11697.6	31813.9	146601	7325.76
F7	21	31634.2	5415.54	24496.8	127002	3337.37
F8	21	30298	4971.28	23772.6	124871	2282.77
F9	21	32701.7	5289.68	21706.7	118227	3422.73
F10	21	95936.1	12849.2	24960	141984	4068.32
F11	21	77344.2	10417.1	20469.4	122047	2340.14
F12	21	101200	15295.7	21664.4	128066	5165.16
G1	21	111780	16198.1	21840.7	145290	3762.04
[truncated: 10,391 more rows]

## Sheet: Multicomponent Data
Block Type	96alum
Chemistry	SYBR_GREEN
Experiment File Name	D:\ShuJu\LZM\7 sample with IAA.eds
Experiment Run End Time	2023-08-17 00:01:40 AM CST
Instrument Type	sds7500
Passive Reference	ROX
Well	Cycle	SYBR	ROX
A1	1	22126.5	110573
A2	1	33096.2	123598
A3	1	30655.4	120570
A4	1	36026.6	110946
A5	1	34577.4	115025
A6	1	53682.6	138187
A7	1	35046.2	122685
A8	1	187496	404519
A9	1	46172.1	132717
A10	1	35018.2	141786
A11	1	36563.9	147222
A12	1	38741.7	146888
B1	1	39412.3	141472
B2	1	40714.7	131020
B3	1	32255.3	137282
B4	1	30090.3	115045
B5	1	33240.8	142695
B6	1	25212	122461
B7	1	29732.6	123394
B8	1	110420	388279
B9	1	37769.3	123379
B10	1	43208	137679
B11	1	44368.6	148203
B12	1	47032.1	145004
C1	1	42385.5	143335
C2	1	43596.1	184011
C3	1	36191.1	130595
C4	1	31098.2	119670
C5	1	33310.2	131967
C6	1	30533	128801
C7	1	29140.3	122943
C8	1	33227.3	121453
C9	1	37074.9	119730
C10	1	35764.6	141878
C11	1	33850.7	148944
C12	1	44595.4	147982
D1	1	47086.1	148440
D2	1	34594.6	139295
D3	1	37420.1	135834
D4	1	31471.2	123825
D5	1	35720.1	133774
D6	1	40870	132303
D7	1	27878.6	122645
D8	1	28444.1	125641
D9	1	42865.5	122385
D10	1	46391.4	142237
D11	1	44762.4	135288
D12	1	161429	150682
E1	1	47004.5	144616
E2	1	46434	136717
E3	1	70734.6	135036
E4	1	34451.9	132686
E5	1	28934.1	133837
E6	1	32476.7	141704
E7	1	40405.9	123471
E8	1	34091.7	122813
E9	1	36301.7	125161
E10	1	37536.6	136824
E11	1	40466.4	131156
E12	1	61381.5	139873
F1	1	48230.4	162398
F2	1	51249.7	145823
F3	1	35553.4	138343
F4	1	34986.2	130831
F5	1	29548	135769
F6	1	63481.7	153835
F7	1	30566.3	128099
F8	1	29559.8	126107
F9	1	32047	119706
F10	1	37899.5	143439
F11	1	30187.5	124227
F12	1	52948.9	132248
G1	1	42942.7	151808
G2	1	51787.2	151252
G3	1	38381.7	118126
G4	1	29630.3	125530
G5	1	29187.7	130392
G6	1	31427.4	144698
G7	1	29231.8	123674
G8	1	38990	126523
G9	1	36452.2	116211
G10	1	46966.4	145493
G11	1	77717.9	127756
G12	1	42779.8	135382
H1	1	61433.7	160420
H2	1	45564.5	147328
H3	1	40370	143794
H4	1	36875.3	137781
H5	1	33402	134495
H6	1	43209.3	156014
H7	1	34944.1	147068
H8	1	35175.5	125258
H9	1	34900.6	130049
H10	1	51804	157378
H11	1	40483.1	146344
H12	1	42872.2	140405
A1	2	21972.2	111024
A2	2	33354.5	124090
A3	2	31123.3	121399
A4	2	36171	111493
A5	2	35265.3	116300
A6	2	54567.3	137472
A7	2	35510.5	122748
A8	2	187769	403807
A9	2	46566.1	132898
A10	2	34928.3	141058
A11	2	36690	147612
A12	2	39637.9	147529
B1	2	39962	141881
B2	2	40208	130171
B3	2	32487.4	136883
B4	2	29959.7	114255
B5	2	33214.8	141707
B6	2	25126.1	121520
B7	2	29741.3	122827
B8	2	109543	387077
B9	2	37312.4	122968
B10	2	42729.8	135963
B11	2	44134.7	147316
B12	2	47409.1	145240
C1	2	42586.2	143891
C2	2	43604.2	182158
C3	2	36452.2	129717
C4	2	31137	118788
C5	2	33623.3	130534
C6	2	30520	127712
C7	2	28925.3	122772
C8	2	33381.1	120903
C9	2	36303.4	118860
C10	2	36027.6	140194
C11	2	34112	148015
C12	2	44609.9	149014
D1	2	47213.4	148378
D2	2	34269.3	138529
D3	2	37447.2	134879
D4	2	31116	123090
D5	2	35830.5	133181
D6	2	41198.2	131357
D7	2	27775.2	121604
D8	2	28679	124778
D9	2	41894.3	120954
D10	2	46271.5	141023
D11	2	45023.1	134842
D12	2	162776	151006
E1	2	47100.4	144695
E2	2	46113.5	136657
E3	2	70848.5	134350
E4	2	34900.5	132444
E5	2	29213.5	133390
E6	2	32542.9	140321
E7	2	40064.5	122684
E8	2	34252.2	122479
E9	2	36496.6	124257
E10	2	37286.1	135793
E11	2	40149.8	130391
E12	2	62763.7	140057
F1	2	48591.6	161212
F2	2	50507.9	144668
F3	2	35053	138134
F4	2	35303.6	130048
F5	2	29601.6	134839
F6	2	63835.8	152321
F7	2	30531.9	127747
F8	2	29947.9	125971
F9	2	31994.7	119169
F10	2	37741.5	142560
F11	2	30344	123957
F12	2	54323.7	133000
G1	2	43548.9	151633
G2	2	51279.3	150138
G3	2	38079.3	117727
G4	2	29227.8	124678
G5	2	29116.1	129223
G6	2	31382.2	143460
G7	2	28993.5	122898
G8	2	38911.6	125771
G9	2	36540.5	115239
G10	2	46402.5	144650
G11	2	76774	126768
G12	2	43144.3	136573
H1	2	61839.6	160476
H2	2	45488.3	147809
H3	2	40160.5	144125
H4	2	37253.7	137343
H5	2	33506	135887
H6	2	43703.9	157128
H7	2	35537	147310
H8	2	35598.2	125744
H9	2	35580.1	130831
H10	2	52297	157950
H11	2	39892.6	146248
H12	2	43736.7	141182
A1	3	22333.2	111231
A2	3	33480.6	124724
A3	3	31029.3	120492
A4	3	36188.3	111314
A5	3	35598.5	115648
A6	3	54543.4	136830
A7	3	35753.4	122166
A8	3	187085	400964
A9	3	46324.7	132460
A10	3	35420.2	140423
A11	3	36752.1	147231
A12	3	39322.9	147573
B1	3	39745.7	141026
B2	3	40054.9	130334
B3	3	32089.7	136345
B4	3	30626	113731
B5	3	32691.9	141426
B6	3	24857.8	121050
B7	3	29770.2	122269
B8	3	110044	385094
B9	3	37129.1	122138
B10	3	42645.2	134923
B11	3	43363.4	146547
B12	3	47701.7	144830
C1	3	42240.3	143556
C2	3	43466.6	182389
C3	3	36116.9	129877
C4	3	31037.2	118834
C5	3	33764.2	130432
C6	3	30361.2	127481
C7	3	29232.8	122177
C8	3	33391.1	120736
C9	3	35837.8	118584
C10	3	35917.1	139234
C11	3	33891	147881
C12	3	44838.4	148161
D1	3	47468.8	148210
D2	3	34201.4	138358
D3	3	37428.8	134806
D4	3	31035.7	123116
D5	3	36145	132619
D6	3	41155.9	130706
D7	3	28074.9	121639
D8	3	28798.1	124933
D9	3	41599.7	120323
D10	3	46155.8	140224
D11	3	44578.5	134346
D12	3	161898	150320
E1	3	47029	143895
E2	3	45381.9	136303
E3	3	70284.8	134085
E4	3	34774.9	132257
E5	3	29673.9	133070
E6	3	32348.9	139821
E7	3	39939	122849
E8	3	33996	121869
E9	3	36138.8	123855
E10	3	37117.2	134967
E11	3	40297.5	129776
E12	3	62490.4	139884
F1	3	48493.2	160749
F2	3	50065.9	144588
F3	3	35046	138044
F4	3	35853.7	129707
F5	3	29822.9	134397
F6	3	64001.9	151478
F7	3	30737.8	127225
F8	3	29790.2	125473
F9	3	31884	118616
F10	3	37819.7	142292
F11	3	30413.4	123995
F12	3	53756	132301
G1	3	43646.3	150897
G2	3	51711.4	150999
G3	3	38329.9	117222
G4	3	29254.1	124441
G5	3	29242.9	129129
G6	3	31374.6	143271
G7	3	29051.3	122483
G8	3	38809.4	125534
G9	3	36328.7	115151
G10	3	46761.9	144276
G11	3	75592.9	126217
G12	3	43365.3	136801
H1	3	62102.3	160596
H2	3	45650.1	148702
H3	3	40393	144034
H4	3	37106	137243
H5	3	33540.7	135896
H6	3	43336	155640
H7	3	35705.5	146781
H8	3	35818.7	125571
H9	3	35675.8	130057
H10	3	52399.1	158488
H11	3	40230.6	146576
H12	3	43691.7	141458
A1	4	22581.7	110541
A2	4	33230	124403
A3	4	31077.1	119459
A4	4	35860.3	110229
A5	4	35349.4	115151
A6	4	54417.9	136320
A7	4	35406.2	121359
A8	4	185612	398192
A9	4	46265.8	131776
A10	4	35114	139102
A11	4	36658	146231
A12	4	39495.1	146524
B1	4	39389.2	140307
B2	4	40151.8	129660
B3	4	31798.1	135890
B4	4	30654.2	113663
B5	4	32920.4	140954
B6	4	25417.7	120723
B7	4	29175.6	122092
B8	4	109990	383401
B9	4	37099.9	121954
B10	4	42614.5	134666
B11	4	43632.8	146305
B12	4	47790.2	144531
C1	4	42779.5	142861
C2	4	43722.4	181844
C3	4	36174.2	129701
C4	4	31098.4	118570
C5	4	33660.5	129545
C6	4	30611.2	126914
C7	4	29231.1	121812
C8	4	33141.3	120138
C9	4	35708.6	118153
C10	4	35666.4	138845
C11	4	33896.9	147396
C12	4	45113.7	147271
D1	4	47005.1	147827
D2	4	34275.9	138459
D3	4	37552.8	134379
D4	4	31262.2	122840
D5	4	36673.9	132261
D6	4	41300.7	130061
D7	4	28063.1	120920
D8	4	28797.9	124066
D9	4	41024.1	119717
D10	4	45948.2	139391
D11	4	44533.5	134481
D12	4	161133	149245
E1	4	47032.5	143615
E2	4	45543.2	136300
E3	4	70037.2	133490
E4	4	35093.5	132084
E5	4	29606.8	132864
E6	4	32502.3	139677
E7	4	39796.3	121902
E8	4	34116.7	121608
E9	4	36081.1	123317
E10	4	36912.4	134485
E11	4	40018.1	129437
E12	4	62631.4	138856
F1	4	48233.9	159928
F2	4	49834	144525
F3	4	35209.9	137701
F4	4	35881.3	129475
F5	4	29884.9	134294
F6	4	64833.3	151259
F7	4	30708.7	126773
F8	4	29859.2	125049
F9	4	31761.5	118008
F10	4	37614.7	142253
F11	4	30459.9	123842
F12	4	54102.3	131810
G1	4	43135.6	150183
G2	4	51232.9	151054
G3	4	37822.7	117292
G4	4	29417.6	124094
G5	4	29113.4	128847
G6	4	31490	142731
G7	4	28729.8	122002
G8	4	38621.8	125117
G9	4	36408.8	114902
G10	4	46634.6	143805
G11	4	74111.8	125897
G12	4	43676	136203
H1	4	62052.9	159325
H2	4	46018.8	148788
H3	4	40281	143411
H4	4	37082.6	136817
H5	4	33607	135696
H6	4	43122.2	154222
H7	4	35722.2	146232
H8	4	35886.7	124965
H9	4	35773.1	129047
H10	4	52322.1	157812
H11	4	40153.2	145958
H12	4	43393.7	141087
A1	5	22241	110097
A2	5	32852.4	124073
A3	5	31067.9	118923
A4	5	36049	110177
A5	5	35344.2	114842
A6	5	53621.9	135323
A7	5	35387.9	121090
A8	5	184686	396864
A9	5	46433.6	131469
A10	5	35065.6	138245
A11	5	36934.5	145792
A12	5	39565.4	146227
B1	5	38707.5	140423
B2	5	40005.5	130021
B3	5	31983.8	135873
B4	5	30807.2	112971
B5	5	32582.9	140395
B6	5	24947.5	120859
B7	5	29465.6	121883
B8	5	108613	382901
B9	5	36883	121819
B10	5	42242.7	134057
B11	5	43183.4	146306
B12	5	46903.9	143597
C1	5	42364	142504
C2	5	43741	181851
C3	5	36312.8	129732
C4	5	31229.8	118012
C5	5	34133.8	129945
C6	5	30448.3	126577
C7	5	29337.5	122140
C8	5	33156	119928
C9	5	35703.7	117960
C10	5	35583.9	138507
C11	5	33600.2	147458
C12	5	44960.2	146759
D1	5	47180.6	148046
D2	5	34163.4	138399
D3	5	37623.4	134624
D4	5	31256.6	122924
D5	5	36814.6	132417
D6	5	41328.4	130103
D7	5	28464.4	120977
D8	5	28482.9	124418
D9	5	40621.4	119537
D10	5	45769.2	139206
D11	5	44632.9	134685
D12	5	160164	148562
E1	5	47090.5	143444
E2	5	45364.5	135840
E3	5	69188.5	133570
E4	5	35236.5	132063
E5	5	29993.8	133078
E6	5	32435.9	139577
E7	5	39655.6	121776
E8	5	34262.5	121295
E9	5	35925.1	122761
E10	5	36879	134455
E11	5	39900.1	129593
E12	5	61969.9	138809
F1	5	48153.6	159728
F2	5	49359.8	144446
F3	5	35246	137513
F4	5	35861.2	129117
F5	5	29889.3	134119
F6	5	65128.3	150749
F7	5	30549.1	126268
F8	5	29639.4	125024
F9	5	31741.4	118351
F10	5	37440.9	142276
F11	5	30158.8	124132
F12	5	53941.1	131187
G1	5	43787.9	149401
G2	5	51023	150924
G3	5	37959.9	116609
G4	5	29418.1	124060
G5	5	29398.9	128587
G6	5	31252.5	142522
G7	5	28971.8	121992
G8	5	38656.3	125087
G9	5	36188.6	114875
G10	5	46581.8	143457
G11	5	73100.2	126034
G12	5	43342.5	135269
H1	5	61934.3	159056
H2	5	45942	149102
H3	5	40171.8	143305
H4	5	37071.3	136574
H5	5	34050.4	135581
H6	5	42957	153457
H7	5	35461.9	145464
H8	5	35799.5	124750
H9	5	35377.5	129000
H10	5	52073.7	157135
H11	5	40163.6	145758
H12	5	43484.7	140776
A1	6	22166.3	109954
A2	6	33459.6	124556
A3	6	30811.2	119332
A4	6	35500.8	109624
A5	6	35326	114701
A6	6	53744.3	135054
A7	6	35111.5	120383
A8	6	183240	396830
A9	6	45952.7	131280
A10	6	34829.3	137915
A11	6	36446.6	145679
A12	6	39191.9	145582
B1	6	39409	139690
B2	6	39648.6	129263
B3	6	32355	135746
B4	6	30696.3	113784
B5	6	32565.9	140455
B6	6	25362	120378
B7	6	29356.3	122184
B8	6	109514	382123
B9	6	37062.4	121742
B10	6	42349.1	134057
B11	6	43090.2	145826
B12	6	47432.1	142447
C1	6	41959.2	142119
C2	6	43954.4	181963
C3	6	36522	129531
C4	6	30959.9	118641
C5	6	34012.8	129466
C6	6	30562.6	126688
C7	6	29336	121963
C8	6	33170.8	119694
C9	6	35526.2	117907
C10	6	35641.1	138475
C11	6	33746.6	147374
C12	6	44705	146276
D1	6	46948.2	147324
D2	6	34288.8	138382
D3	6	37623.6	134423
D4	6	31490.4	123199
D5	6	37120.2	131985
D6	6	41375.8	129450
D7	6	28380.6	120740
D8	6	28779.9	124344
D9	6	40485.5	119707
D10	6	45802.4	139054
D11	6	44247	134629
D12	6	159302	148136
E1	6	46525	143155
E2	6	45171.8	135755
E3	6	68966.1	133399
E4	6	35053	132269
E5	6	29958.2	132997
E6	6	32333.6	139796
E7	6	39469.1	121994
E8	6	34296.9	121396
E9	6	35950.7	122787
E10	6	37112.5	134198
E11	6	39830.5	129457
E12	6	62222.1	138108
F1	6	47392.1	159327
F2	6	48873.4	144163
F3	6	35303	137618
F4	6	36005.9	129264
F5	6	29867.8	133840
F6	6	65696.9	150894
F7	6	30877.1	126570
F8	6	30093	124914
F9	6	32007.4	118491
F10	6	37606	141740
F11	6	29980.5	123363
F12	6	53425.2	130692
G1	6	42944.4	149207
G2	6	51515	151053
G3	6	37763.4	116236
G4	6	29475.7	124114
G5	6	29411.6	128256
G6	6	31420.7	142529
G7	6	28877.4	122197
G8	6	38556.6	124938
G9	6	36260.3	115290
G10	6	46764.8	143499
G11	6	72852.7	125786
G12	6	43198.8	135135
H1	6	61625.6	159245
H2	6	46217.5	150094
H3	6	40367.9	143233
H4	6	37037.6	136289
H5	6	33885.5	136108
H6	6	42991.1	152801
H7	6	35516.5	144852
H8	6	35829.4	124242
H9	6	35269.8	128515
H10	6	51932.2	157111
H11	6	39848.7	145537
H12	6	43753.5	140142
A1	7	22044.3	109414
A2	7	33241.3	125287
A3	7	31084.5	119128
A4	7	35564.1	109722
A5	7	34912.7	114510
A6	7	53066.4	134580
A7	7	35146.6	120466
A8	7	182314	395258
A9	7	46223.9	131498
A10	7	35057.5	137766
A11	7	36258.8	144909
A12	7	39498.2	145242
B1	7	38982	139706
B2	7	39729.4	129951
B3	7	32288.3	135342
B4	7	30793.3	113328
B5	7	33094.2	139911
B6	7	25006.9	120603
B7	7	29468.2	121904
B8	7	109870	381909
B9	7	36965.9	121422
B10	7	42111.3	133475
B11	7	43263.6	146046
B12	7	46855.6	142043
C1	7	42291.3	142071
C2	7	43146.2	181730
C3	7	36139.2	129407
C4	7	31302.4	118913
C5	7	34142.8	129483
C6	7	30471	126742
C7	7	29315.5	122018
C8	7	33159.7	119415
C9	7	35914.6	117683
C10	7	35337.1	138089
C11	7	33527.9	147392
C12	7	44521.1	145719
D1	7	46602.7	147215
D2	7	34249.5	138829
D3	7	37412	134481
D4	7	31297.3	122965
D5	7	37369.2	132005
D6	7	41568.7	129348
D7	7	28422.8	120815
D8	7	28972.9	124592
D9	7	40086.3	119444
D10	7	45642.4	138802
D11	7	44346	134266
D12	7	158116	147721
E1	7	46570.3	143094
E2	7	45151.7	136009
E3	7	68793.3	133076
E4	7	35313.2	132133
E5	7	30116.5	133104
E6	7	32501	139871
E7	7	39302.8	122055
E8	7	34393	120970
E9	7	35767.5	122494
E10	7	36669.8	134196
E11	7	39576	129276
E12	7	61965.9	137682
F1	7	48085.9	159002
F2	7	48704.7	144165
F3	7	35398.8	137920
F4	7	36385.7	128971
F5	7	29746	133754
F6	7	65871.7	150857
F7	7	30754.9	126473
F8	7	29900.2	125082
F9	7	31925.1	118370
F10	7	37639.8	141992
F11	7	30486.1	123296
F12	7	53160.5	130558
G1	7	43221.2	148459
G2	7	51112.5	150951
G3	7	37721.3	116240
G4	7	29223	123969
G5	7	29577.1	128161
G6	7	31061.3	142157
G7	7	28741.2	122060
G8	7	38227.7	124737
G9	7	35991.4	115073
G10	7	46757.9	143328
G11	7	72383.4	125958
G12	7	42566.4	134876
H1	7	61298.7	158878
H2	7	46059.3	150052
H3	7	40357.1	142988
H4	7	36985.8	136321
H5	7	33683.3	136487
H6	7	42771.2	152062
H7	7	35537.1	144547
H8	7	35636.6	123705
H9	7	35353.5	128099
H10	7	51736	156851
H11	7	40255.5	145575
H12	7	42892.2	139876
A1	8	21809.4	109009
A2	8	33633.1	124836
A3	8	30775.7	118884
A4	8	35354.8	109540
A5	8	34789.1	114580
A6	8	52614.6	134615
A7	8	34983.4	120193
A8	8	181840	395778
A9	8	45813.3	130804
A10	8	34913.9	137264
A11	8	36598	144516
A12	8	39300.4	144749
B1	8	38856.2	139049
B2	8	39652.7	130239
B3	8	32105.8	135693
B4	8	30736.8	113395
B5	8	32877.7	140812
B6	8	25083.9	120708
B7	8	29322.3	121994
B8	8	109278	381056
B9	8	37032.7	121320
B10	8	41890	133475
B11	8	42783.4	145244
B12	8	46544.9	142008
C1	8	42090.6	141790
C2	8	43916.8	182183
C3	8	36562.8	129755
C4	8	31052.8	118122
C5	8	33885.7	128972
C6	8	30563.2	126735
C7	8	29297.5	121960
C8	8	33017.4	119281
C9	8	35428.2	118054
C10	8	35379.9	138059
C11	8	33743.6	147273
C12	8	44437.4	145868
D1	8	46719.5	146847
D2	8	34495.5	138690
D3	8	37517.3	134408
D4	8	31204.7	123467
D5	8	37220.3	132181
D6	8	41327.3	129156
D7	8	28251.5	120946
D8	8	28765.6	124383
D9	8	39759.9	119509
D10	8	45669.2	138489
D11	8	44489.3	134463
D12	8	157085	147179
E1	8	46574.6	143137
E2	8	45132.5	135882
E3	8	68056.8	133216
E4	8	35077.1	132380
E5	8	29894.2	132985
E6	8	32458.4	139937
E7	8	39257.1	121101
E8	8	34366	120997
E9	8	36038.9	122386
E10	8	36529.9	133772
E11	8	39663.6	129341
E12	8	61344.7	137416
F1	8	47502.9	158761
F2	8	48394.6	144561
F3	8	35451.7	137807
F4	8	36337.5	128821
F5	8	30222.9	133622
F6	8	65994.8	150758
F7	8	30696.3	126395
F8	8	29882	125183
F9	8	31703.3	118425
F10	8	37281.7	142313
F11	8	30244.4	123377
F12	8	53190.7	130323
G1	8	43155.4	148432
G2	8	51257.1	150626
G3	8	37828	116277
G4	8	29242.1	124505
G5	8	29416.8	128206
G6	8	31446.9	142268
G7	8	28567.9	121881
G8	8	38478	124609
G9	8	36137	115199
G10	8	46916.9	143185
G11	8	71901.8	125792
G12	8	42556.7	134320
H1	8	61398	157917
H2	8	46079.7	150606
H3	8	40300.7	142881
H4	8	36873.3	136047
H5	8	33811.5	136335
H6	8	42543.3	151424
H7	8	35595.8	144285
H8	8	35618.7	123664
H9	8	35438.6	128374
H10	8	52271.2	156453
H11	8	39874.7	144954
H12	8	43123.2	139236
A1	9	22647.4	109081
A2	9	33551.8	125001
A3	9	31186.2	118856
A4	9	35188.6	109541
A5	9	34969.5	114455
A6	9	52498.3	134156
A7	9	34676.9	119911
A8	9	180412	394441
A9	9	45855.5	130920
A10	9	34772.4	137355
A11	9	36263.7	144195
A12	9	39369.7	143733
B1	9	39178	138757
B2	9	39732.2	130027
B3	9	32131.9	135003
B4	9	30426.8	113466
B5	9	32627.6	139887
B6	9	25196.9	120664
B7	9	29412.4	121467
B8	9	109249	380617
B9	9	36928.7	121292
B10	9	41363.8	133188
B11	9	42809.5	144461
B12	9	46122.5	141411
C1	9	41816.6	141536
C2	9	43461.5	181511
C3	9	36440.9	129889
C4	9	31274.3	118897
C5	9	34155.8	128708
C6	9	30499	126720
C7	9	29108.6	121764
C8	9	33279	118909
C9	9	35396.1	117943
C10	9	35477.2	137779
C11	9	33838.6	146894
C12	9	43767.4	145205
D1	9	46702.1	146527
D2	9	34702.6	139030
D3	9	36835.6	133872
D4	9	30981.1	123414
D5	9	37270.3	131562
D6	9	41133.6	128841
D7	9	28133.2	120621
D8	9	28862.2	124379
D9	9	39547.6	119206
D10	9	45413.1	138382
D11	9	43870.4	134117
D12	9	156061	146769
E1	9	47003.7	142757
E2	9	45139.7	135572
E3	9	67801.4	132913
E4	9	35173.8	132179
E5	9	30104.8	133059
E6	9	32425.6	139707
E7	9	39123.7	121454
E8	9	34503.7	120834
E9	9	35827	122030
E10	9	36521.1	133646
E11	9	39563.6	129086
E12	9	60873.4	137159
F1	9	47714.1	158684
F2	9	48303.4	144677
F3	9	35201.4	137627
F4	9	36105.8	128940
F5	9	30091.8	133431
F6	9	66008.6	150610
F7	9	30705	126314
F8	9	29824.5	124925
F9	9	31893.3	118189
F10	9	37070.1	142177
F11	9	29962.6	123315
F12	9	52942.3	129816
G1	9	42660.9	148302
G2	9	51093.9	151028
G3	9	37581.6	116304
G4	9	29478	124571
G5	9	29568	128198
G6	9	31307.2	142178
G7	9	28669.8	122108
G8	9	38662.7	124725
G9	9	35698.9	115380
G10	9	46902.6	143117
G11	9	71563.8	125876
G12	9	42974.6	134171
H1	9	61661.3	157478
H2	9	46606.6	150602
H3	9	39895.5	142925
H4	9	36927.5	135908
H5	9	33833	136711
H6	9	42646.7	151021
H7	9	35351.2	144118
H8	9	35443	123362
H9	9	35264.7	128036
H10	9	51869.7	155967
H11	9	40248.7	144528
H12	9	43273.2	138570
A1	10	22253.9	108449
A2	10	33708	125227
A3	10	31108.9	118556
A4	10	35153.7	109574
A5	10	34964.6	114568
A6	10	52339	134038
A7	10	34747.5	119951
A8	10	181667	394080
A9	10	45626.2	131004
A10	10	34724.5	137116
A11	10	36840.8	144154
A12	10	39331.6	143216
B1	10	39126	138053
B2	10	39442.3	129775
B3	10	32086.6	135235
B4	10	30685.7	113499
B5	10	32632.2	140193
B6	10	25324.1	120439
B7	10	29476.7	121534
B8	10	108824	380934
B9	10	36855.5	121159
B10	10	41445.7	132891
B11	10	42860.3	144636
B12	10	45945.6	141221
C1	10	41814.5	141064
C2	10	43418.7	181787
C3	10	36674.9	129590
C4	10	31270.7	118889
C5	10	33676.3	129030
C6	10	30485.4	126663
C7	10	29673.9	121817
C8	10	32966	118851
C9	10	35393.4	117901
C10	10	35231	137643
C11	10	33208.7	147009
C12	10	44231.8	144687
D1	10	46452.5	146341
D2	10	34497.6	138853
D3	10	37196	134173
D4	10	31141	123462
D5	10	37295.8	131652
D6	10	41249	128288
D7	10	28291.5	121107
D8	10	28706.7	124319
D9	10	39800.1	119120
D10	10	45172.2	138194
D11	10	44310.3	133718
D12	10	154545	146536
E1	10	46260.9	142784
E2	10	44807.7	135601
E3	10	67771.5	132872
E4	10	35252.3	132449
E5	10	30235.7	133061
E6	10	32392.3	140316
E7	10	39292.9	121902
E8	10	34541.1	120918
E9	10	35844.9	122396
E10	10	36444.2	133273
E11	10	39670.4	129043
E12	10	60568.9	136450
F1	10	47404.6	158397
F2	10	47585	144422
F3	10	35178.1	137464
F4	10	36177.1	129086
F5	10	30030.3	133532
F6	10	65958.7	150123
F7	10	30836.2	126555
F8	10	29888	124811
F9	10	31555.6	118470
F10	10	37090.8	141903
F11	10	30166.8	123004
F12	10	52783.4	129615
G1	10	42949.5	147469
G2	10	50860.5	151150
G3	10	37563.9	116063
G4	10	29315.7	124296
G5	10	29235.7	128010
G6	10	31362.5	142356
G7	10	28885.2	122000
G8	10	38523.1	124655
G9	10	35768.6	115517
G10	10	46650.2	142788
G11	10	70679.5	125648
G12	10	43313.7	134191
H1	10	61094.2	157904
H2	10	46549.6	151164
H3	10	39761.6	142202
H4	10	36766.2	135822
H5	10	33821.7	136692
H6	10	42500.5	150667
H7	10	35248.7	143847
H8	10	35511.4	123471
H9	10	35153.4	127784
H10	10	51816.4	156097
H11	10	40225	144325
H12	10	43729	138020
A1	11	22025.1	107489
A2	11	33464.4	125580
A3	11	30555.7	118806
A4	11	35250.3	109651
A5	11	35210	114507
A6	11	51922.5	133917
A7	11	34591.7	120055
A8	11	179409	394137
A9	11	45935.5	130536
A10	11	35224.6	136693
A11	11	36664.9	143630
A12	11	38800.1	142576
B1	11	38904.9	137942
B2	11	39194.4	129813
B3	11	31972	135048
B4	11	30461	113304
B5	11	32674.8	139922
B6	11	25473.2	120656
B7	11	29300.1	121452
B8	11	109140	381230
B9	11	36890.4	121194
B10	11	41156.4	132818
B11	11	42486.8	144463
B12	11	45919	141350
C1	11	41486.5	141346
C2	11	43118	181854
C3	11	36449.4	129299
C4	11	31416.3	118923
C5	11	33863.7	128952
C6	11	30330.5	126790
C7	11	29316.5	121760
C8	11	33059.7	118717
C9	11	35596.1	117990
C10	11	35122.6	137287
C11	11	33280	146868
C12	11	44265.2	145183
D1	11	46519.7	146333
D2	11	34149.8	139167
D3	11	37113.2	133537
D4	11	30973.3	123993
D5	11	37416.6	131791
D6	11	40854	128599
D7	11	28237.5	121269
D8	11	29022.3	124704
D9	11	39785.5	119087
D10	11	45169.2	138577
D11	11	43686.3	134274
D12	11	154176	146626
E1	11	46520.4	142935
E2	11	44661.9	135349
E3	11	67732.4	132891
E4	11	35095	132507
E5	11	30082.7	133217
E6	11	32326.2	140427
E7	11	39164	121620
E8	11	34336.6	120625
E9	11	35920	122478
E10	11	36303.9	133966
E11	11	39543.2	129121
E12	11	60098.6	136884
F1	11	47718.5	158351
F2	11	47478.2	144188
F3	11	35261.3	137578
F4	11	36418	128684
F5	11	30033.1	133695
F6	11	66335.1	149689
F7	11	30450.9	126829
F8	11	29693.1	125035
F9	11	31951.9	118493
F10	11	37327.3	141768
F11	11	30296	122866
F12	11	52919	129474
G1	11	42807.4	147658
G2	11	51079.2	151180
G3	11	37845.1	116227
G4	11	29499.8	124152
G5	11	29212.2	128019
G6	11	31305.6	142491
G7	11	28751.2	122460
G8	11	38512.8	124600
G9	11	35953.9	115566
G10	11	46624.3	142633
G11	11	70361.4	125572
G12	11	42790.3	134032
H1	11	60909.4	157443
H2	11	46076.3	151493
H3	11	39915.2	142632
H4	11	36861.7	135396
H5	11	33983.4	136577
H6	11	42638.2	150212
H7	11	35448.2	144214
H8	11	35473.2	123475
H9	11	35285.4	127530
H10	11	51939.7	155896
H11	11	40056.3	144031
H12	11	43725.9	137882
A1	12	22072.1	107563
A2	12	32964	125428
A3	12	30922	118626
A4	12	35254.3	109630
A5	12	34842.5	114853
A6	12	51657.7	133645
A7	12	34913.3	119785
A8	12	179850	393589
A9	12	45678.3	130664
A10	12	35248.2	136967
A11	12	36434.7	143530
A12	12	38973.2	142135
B1	12	38912.1	138584
B2	12	38696.4	129876
B3	12	32121.3	135069
B4	12	30401.5	113595
B5	12	32633.4	140009
B6	12	25240.8	120538
B7	12	29412.9	122092
B8	12	109125	380812
B9	12	36653	121204
B10	12	41124.9	132542
B11	12	42668.3	144390
B12	12	45877.3	141394
C1	12	41606.9	141148
C2	12	43292.3	181539
C3	12	36280.2	129040
C4	12	31145.4	119224
C5	12	33831.9	128729
C6	12	30557.6	127092
C7	12	29386.9	122113
C8	12	33210.6	119023
C9	12	35413.8	118046
C10	12	35158.8	137130
C11	12	33256.9	146949
C12	12	44262.7	144562
D1	12	46487.6	146218
D2	12	34459.7	139400
D3	12	37168.5	133890
D4	12	30993	123589
D5	12	37747.6	131636
D6	12	40969	128273
D7	12	28270.6	121180
D8	12	29039.3	124565
D9	12	39356.5	119446
D10	12	45140.5	138266
D11	12	43787.1	134408
D12	12	153642	146217
E1	12	46272.1	143334
E2	12	44591	135620
E3	12	67155	133207
E4	12	35016.1	132702
E5	12	30086.4	133365
E6	12	32354.3	140776
E7	12	39121	121756
E8	12	34351.5	120648
E9	12	36058.5	122133
E10	12	36444.4	133944
E11	12	39582.5	129116
E12	12	60095.6	136492
F1	12	47491.7	158062
F2	12	47445.3	144643
F3	12	35609	137707
F4	12	36114.5	128945
F5	12	29741.9	133432
F6	12	66054.5	150108
F7	12	31082	126924
F8	12	29657.3	125321
F9	12	32053.5	118456
F10	12	36939	142307
F11	12	30453.1	123406
F12	12	52778	129727
G1	12	42819.9	147505
G2	12	51066.6	151232
G3	12	37768.1	116074
G4	12	29504.2	124662
G5	12	29563.1	127834
G6	12	31232.5	142415
G7	12	28764.2	122410
G8	12	38485.1	124270
G9	12	35869.6	115912
G10	12	47190	142507
G11	12	70056.3	125813
G12	12	43007.8	134469
H1	12	61117	157293
H2	12	46597.1	151538
H3	12	40420.7	142596
H4	12	36957.3	135919
H5	12	34050.7	137061
H6	12	42280.2	150217
H7	12	35530.2	143961
H8	12	35470.1	123709
H9	12	35541.5	127611
H10	12	51938.1	155817
H11	12	40512.4	144153
H12	12	43843.3	138079
A1	13	22051	107406
A2	13	33240.2	125579
A3	13	30636.6	118546
A4	13	35351.8	110312
A5	13	34788.6	114803
A6	13	51611.8	133634
A7	13	34535.5	120054
A8	13	179000	394631
A9	13	45565	130585
A10	13	34809	136794
A11	13	36215.5	143414
A12	13	38816.6	141749
B1	13	38968.4	137967
B2	13	39053.2	130035
B3	13	31991.8	134214
B4	13	30453.2	113424
B5	13	32881.7	139928
B6	13	25095.9	120914
B7	13	29344.8	121723
B8	13	108184	380173
B9	13	36888.3	121414
B10	13	41407.9	132506
B11	13	42832.9	144026
B12	13	45721.7	141166
C1	13	41677.5	140960
C2	13	43559	181984
C3	13	36166.1	129360
C4	13	31191.3	118989
C5	13	33636.1	128589
C6	13	30537.3	127046
C7	13	29440.7	122013
C8	13	33391.2	118521
C9	13	35421.5	117973
C10	13	34989	136920
C11	13	33173.6	146777
C12	13	43750.9	144733
D1	13	46543.2	146238
D2	13	34438.8	138959
D3	13	36896.7	133733
D4	13	31131.1	124230
D5	13	37706.6	131968
D6	13	40817.3	127916
D7	13	28071.5	121442
D8	13	29104.3	124534
D9	13	39202.9	119214
D10	13	45102.6	138067
D11	13	43582.7	134502
D12	13	152922	146102
E1	13	46124.8	143065
E2	13	44649.7	135878
E3	13	67044	132674
E4	13	34737.5	132833
E5	13	30068.2	133739
E6	13	32365.1	140893
E7	13	39125.4	121823
E8	13	34366.8	120830
E9	13	35817.7	122207
E10	13	36358.4	133614
E11	13	39567.9	128918
E12	13	59854.9	136581
F1	13	47507.3	157918
F2	13	47557.8	144211
F3	13	35629.1	137560
F4	13	36501.1	128749
F5	13	29881.1	133242
F6	13	65733.1	149587
F7	13	30884	126899
F8	13	30025.4	125233
F9	13	31799.5	118221
F10	13	37670.6	142328
F11	13	30386.2	123153
F12	13	52715.5	129280
G1	13	42475.3	147283
G2	13	51102.9	151518
G3	13	37684.8	116025
G4	13	29109	124526
G5	13	29331.5	127689
G6	13	31357.3	142577
G7	13	28606.8	122729
G8	13	38716.2	124441
G9	13	35950	115899
G10	13	47252.9	142412
G11	13	70204.4	125814
G12	13	43109	134383
H1	13	61418.8	156332
H2	13	46970.4	151781
H3	13	40308.2	142202
H4	13	36837.5	135505
H5	13	34052.5	136895
H6	13	42726.9	149880
H7	13	35594.8	143931
H8	13	35554.6	123474
H9	13	35687.2	127507
H10	13	51950.7	155147
H11	13	40368.3	143825
H12	13	43855.2	137369
A1	14	22119.8	107246
A2	14	32806.9	125943
A3	14	30723.4	118555
A4	14	35025.6	109503
A5	14	34683.8	114534
A6	14	51367.9	133576
A7	14	34444.4	119946
A8	14	177469	394113
A9	14	45292.8	130603
A10	14	35181.5	136989
A11	14	36126.3	142823
A12	14	39009.6	141449
B1	14	39115	137957
B2	14	39035.5	129785
B3	14	32309.5	134330
B4	14	30552.9	113543
B5	14	32666.4	139797
B6	14	25785.9	120614
B7	14	29233.7	121923
B8	14	109073	381023
B9	14	37010.3	121190
B10	14	41503.3	132390
B11	14	42548.3	144170
B12	14	45894.4	140854
C1	14	41691.1	140423
C2	14	43693.5	181610
C3	14	36494.9	129261
C4	14	31356.5	119157
C5	14	33511.7	128930
C6	14	30645.9	127061
C7	14	29382.3	122170
C8	14	33008.3	118403
C9	14	35356.3	118339
C10	14	35240.8	136846
C11	14	33221.3	146920
C12	14	43852	144518
D1	14	46166	146274
D2	14	34437.8	138982
D3	14	36632.3	133580
D4	14	31123.3	124042
D5	14	37773.5	131780
D6	14	40889.4	128358
D7	14	28058.6	121169
D8	14	29093.7	124887
D9	14	38967.4	119457
D10	14	45068.2	137966
D11	14	44013.2	134258
D12	14	152114	145440
E1	14	46502.2	143087
E2	14	44262.4	135267
E3	14	66549.9	133199
E4	14	34696.9	132791
E5	14	30189	133623
E6	14	32562.3	141330
E7	14	38935.2	121817
E8	14	34425.4	121106
E9	14	36097.3	121833
E10	14	36115.2	134007
E11	14	39458.8	129190
E12	14	59472.8	136341
F1	14	47610.4	157723
F2	14	47517.4	144891
F3	14	35500.4	137692
F4	14	36419	128563
F5	14	30030.4	133512
F6	14	65357.6	149584
F7	14	30892.3	126926
F8	14	29809.3	125322
F9	14	31751	118681
F10	14	37582.4	142047
F11	14	30698.8	122749
F12	14	53019	129200
G1	14	43625.1	147568
G2	14	51855.6	151319
G3	14	38433.6	116428
G4	14	29147.4	124669
G5	14	29695.2	127618
G6	14	31321.1	142480
G7	14	28959.7	122697
G8	14	38725.5	124237
G9	14	35773.5	116090
G10	14	48070.2	142394
G11	14	70026.8	125339
G12	14	43818.8	134305
H1	14	61740.8	156458
H2	14	47297.9	152027
H3	14	40542.4	142322
H4	14	37219.6	135792
H5	14	34197	137306
H6	14	42909.8	149655
H7	14	35695.7	143325
H8	14	35842	123660
H9	14	35837.8	127308
H10	14	52404.3	155209
H11	14	40808.6	144043
H12	14	44147.2	137061
A1	15	21916.1	107409
A2	15	33130.9	125515
A3	15	31140.7	118093
A4	15	34916.9	109556
A5	15	34744.2	114405
A6	15	51168.1	133534
A7	15	34557.6	119688
A8	15	177203	393970
A9	15	45517.2	130316
A10	15	34715.9	136509
A11	15	36390.6	143006
A12	15	39212	140503
B1	15	38190.6	137353
B2	15	39094.7	130060
B3	15	32007.6	133957
B4	15	30456.2	113678
B5	15	32461	139507
B6	15	25133.5	120900
B7	15	29449.3	121730
B8	15	108765	379793
B9	15	36991.6	120801
B10	15	41112.4	132087
B11	15	42228.1	143545
B12	15	45684.1	141398
C1	15	41500.7	140604
C2	15	43593.6	181665
C3	15	36245.7	129518
C4	15	31326.7	119395
C5	15	33973	128867
C6	15	30421.4	127093
C7	15	29387.7	122141
C8	15	33169.6	118774
C9	15	35397	118354
C10	15	35063.4	137214
C11	15	33410.2	146706
C12	15	44310	144176
D1	15	46336.3	146102
D2	15	34676.2	139228
D3	15	36928.1	133418
D4	15	30954.9	124186
D5	15	37735	131946
D6	15	40812.5	128011
D7	15	28258.1	121110
D8	15	29476.8	124765
D9	15	38647.8	119336
D10	15	45184.6	137662
D11	15	44203.3	134480
D12	15	151583	145266
E1	15	46003.6	143696
E2	15	44683.5	134987
E3	15	66412.5	132594
E4	15	34573.2	132860
E5	15	30162.8	133806
E6	15	32610.1	141213
E7	15	38795.1	121810
E8	15	34410.2	120909
E9	15	35977.5	121819
E10	15	36436.4	133695
E11	15	39767.5	128800
E12	15	59268.1	136429
F1	15	47901.2	157579
F2	15	48057.9	144727
F3	15	36248.4	137687
F4	15	36419.3	128567
F5	15	30148.4	133295
F6	15	64979.3	148828
F7	15	30893.5	127083
F8	15	29854.6	125334
F9	15	31724.6	118517
F10	15	38389.8	142316
F11	15	31146.3	122806
F12	15	53530	129443
G1	15	44223.3	147436
G2	15	52494.7	151205
G3	15	39211.2	115946
G4	15	29564.5	124626
G5	15	29589.3	127257
G6	15	31264.8	142460
G7	15	28758.2	122831
G8	15	38792.6	124346
G9	15	35655	116187
G10	15	49001.2	142051
G11	15	70329.9	125867
G12	15	44532.6	134318
H1	15	62466.5	156124
H2	15	47897.7	152198
H3	15	40990.7	142172
H4	15	37530.3	135604
H5	15	34765	137397
H6	15	42910.9	149061
H7	15	36459.9	143549
H8	15	35992.1	123531
H9	15	36225.4	127473
H10	15	52988.2	154979
H11	15	41355.8	144119
H12	15	44733.9	136492
A1	16	21847.7	107107
A2	16	33371.4	125482
A3	16	30694	118158
A4	16	35256.3	109808
A5	16	34594.1	114580
A6	16	50732.7	133461
A7	16	34493	120066
A8	16	177831	393613
A9	16	45560.8	130243
A10	16	35324.1	136607
A11	16	36542.5	142835
A12	16	39432.7	140607
B1	16	38779.2	137795
B2	16	39368.6	130242
B3	16	31975.6	134484
B4	16	30181	113391
B5	16	32964.9	139316
B6	16	25396.2	120881
B7	16	29213	122018
B8	16	108692	380579
B9	16	36791.2	121128
B10	16	41212.9	131652
B11	16	42699.1	144030
B12	16	45721.2	140923
C1	16	41414.7	140441
C2	16	43217.7	181328
C3	16	36301	129126
C4	16	30965.6	119541
C5	16	33990.2	128355
C6	16	30499.8	127757
C7	16	29514.2	122224
C8	16	33180.2	118419
C9	16	35391.2	118309
C10	16	35063.3	136812
C11	16	33306.7	146350
C12	16	43941.8	144139
D1	16	46563.8	146307
D2	16	34454.1	139772
D3	16	36560	133676
D4	16	30918.8	124774
D5	16	37974.9	131814
D6	16	40830.6	127934
D7	16	27919.9	121491
D8	16	29360	124737
D9	16	39153.5	119838
D10	16	45435.3	137602
D11	16	44168.7	134351
D12	16	151547	145345
E1	16	46552	143153
E2	16	44732.1	135469
E3	16	66104.2	132601
E4	16	34546.3	133222
E5	16	30064.8	134026
E6	16	32357.4	141717
E7	16	39140.5	121959
E8	16	34224.9	120965
E9	16	36224.2	122121
E10	16	37058.7	133743
E11	16	40309.3	128495
E12	16	59453.6	136409
F1	16	48844.9	157772
F2	16	48454.3	144812
F3	16	36888.3	137576
F4	16	36415.9	128631
F5	16	29966.7	133471
F6	16	64857.5	148997
F7	16	30841	127209
F8	16	29592.8	125622
F9	16	31787.7	118563
F10	16	39382.8	142141
F11	16	32207.2	123054
F12	16	54236.8	129495
G1	16	46353.8	147335
G2	16	54083.5	151044
G3	16	41403.2	116041
G4	16	29241.7	124943
G5	16	29723.7	127413
G6	16	31381.4	142813
G7	16	28927.2	122954
G8	16	38363.6	124409
G9	16	35852.5	116364
G10	16	51511.3	142187
G11	16	71647.5	126073
G12	16	46841.7	134510
H1	16	64070.8	155637
H2	16	48833	152498
H3	16	41708.7	142082
H4	16	38493.6	135395
H5	16	35445.6	137611
H6	16	43918.2	148754
H7	16	37616	143601
H8	16	37091.1	123553
H9	16	36737.4	127343
H10	16	54276.8	154936
H11	16	43189.2	143611
H12	16	46267.9	136441
A1	17	21472.5	106823
A2	17	33224.5	125935
A3	17	30811	118424
A4	17	35174.3	109924
A5	17	34648.3	114665
A6	17	51002.8	133138
A7	17	34604.6	120198
A8	17	176828	394744
A9	17	45681	130387
A10	17	35356.4	136552
A11	17	36346.6	142734
A12	17	38975.2	140595
B1	17	38668.6	137147
B2	17	39199.8	130360
B3	17	31846.5	134232
B4	17	30611.7	113640
B5	17	32937.6	139098
B6	17	25566.8	121238
B7	17	29329.1	121767
B8	17	108959	380479
B9	17	37008.7	121020
B10	17	41370	131929
B11	17	42114.7	143545
B12	17	45594.6	140924
C1	17	41421.3	140264
C2	17	43839.3	181948
C3	17	36764.6	128994
C4	17	31334.1	120160
C5	17	33507.4	128692
C6	17	30335.3	127674
C7	17	29627.2	122275
C8	17	33187.8	118299
C9	17	35553.3	118399
C10	17	35273	136844
C11	17	33336.2	146662
C12	17	43891.5	143821
D1	17	46550	146585
D2	17	34487.1	139749
D3	17	36804.3	133367
D4	17	31189.1	124683
D5	17	37887.4	132064
D6	17	40595.6	127734
D7	17	27867.6	121740
D8	17	29505.5	124608
D9	17	38890.2	119533
D10	17	46221.7	137635
D11	17	45244.9	134419
D12	17	151880	145118
E1	17	46085.5	143683
E2	17	44763.2	135479
E3	17	66120.6	132407
E4	17	34658.3	132875
E5	17	29969.6	134158
E6	17	32357.4	141936
E7	17	39064.2	122133
E8	17	34132.3	121154
E9	17	36106	121838
E10	17	37786.3	134036
E11	17	41136.5	128900
E12	17	59911.1	136293
F1	17	50569.6	157842
F2	17	50325.6	144770
F3	17	38547.1	137540
F4	17	36125.4	128738
F5	17	30106.9	133339
F6	17	64599.1	149098
F7	17	30851.2	127289
F8	17	29893.5	125370
F9	17	31966.9	118841
F10	17	41945.6	142509
F11	17	34328.3	122723
F12	17	55926.9	129079
G1	17	49054.8	147100
G2	17	57924.4	151135
G3	17	44789.4	115825
G4	17	29453.1	124746
G5	17	29656.3	127474
G6	17	31589.4	142845
G7	17	28804.6	123059
G8	17	38591.8	124341
G9	17	35777.2	116481
G10	17	56048.7	142145
G11	17	73912	126184
G12	17	49978.7	134675
H1	17	65712.1	155529
H2	17	51482.3	152812
H3	17	44336.3	142273
H4	17	39400.9	135622
H5	17	37120	137719
H6	17	45313.3	148643
H7	17	39582.4	143895
H8	17	38899.8	123551
H9	17	38647.4	127202
H10	17	56828.8	155046
H11	17	45850.4	143344
H12	17	49162	135900
A1	18	22064.6	106794
A2	18	32889.5	125998
A3	18	30826.8	118372
A4	18	34747	109687
A5	18	34448.4	114686
A6	18	50290.9	133124
A7	18	34478.8	120324
A8	18	176329	393526
A9	18	45406.7	129952
A10	18	35722.4	136628
A11	18	36548.2	142103
A12	18	39138.4	140116
B1	18	38176.3	137522
B2	18	38984.4	130878
B3	18	32477.8	133837
B4	18	30379.4	113542
B5	18	32595.2	139933
B6	18	25357.4	121366
B7	18	29224.6	122197
B8	18	109231	379986
B9	18	37007.4	121004
B10	18	41742.5	131740
B11	18	42819.2	143865
B12	18	46770.3	141021
C1	18	41195.8	140185
C2	18	43035.4	181898
C3	18	36676.8	129081
C4	18	31205.7	120130
C5	18	34026.7	128664
C6	18	30775.1	127768
C7	18	29655.7	122571
C8	18	33299.6	118836
C9	18	35450.2	118518
C10	18	35543.4	137218
C11	18	33843.2	146515
C12	18	44348.6	143849
D1	18	46914.1	146220
D2	18	34483.4	140033
D3	18	36808.3	133209
D4	18	31104.2	124920
D5	18	38243.2	132056
D6	18	40561.2	127817
D7	18	28173.9	121885
D8	18	29526.3	124650
D9	18	38435.6	119851
D10	18	48061.7	137607
D11	18	46901.2	134611
D12	18	152606	145308
E1	18	46241	143873
E2	18	44662.3	135367
E3	18	66176.7	132706
E4	18	34889.1	133244
E5	18	30009.7	134007
E6	18	32676.9	142438
E7	18	39200.5	122083
E8	18	34296.4	120844
E9	18	36077.1	121943
E10	18	39614.9	133808
E11	18	42529.2	128790
E12	18	61061.9	136459
F1	18	54037.5	157878
F2	18	53102.1	145280
F3	18	41318.2	137829
F4	18	36367.4	128597
F5	18	30055.2	133212
F6	18	63844.1	148781
F7	18	31117.5	127680
F8	18	29783.9	125734
F9	18	31846.6	118843
F10	18	46554.3	142616
F11	18	37622.6	122853
F12	18	59828.8	129195
G1	18	55275.7	146941
G2	18	64117.1	151144
G3	18	51397.6	116066
G4	18	29631.8	125022
G5	18	29798.9	127187
G6	18	31476	142852
G7	18	29163.3	123271
G8	18	38884.7	123970
G9	18	35622.3	116996
G10	18	64133.9	142114
G11	18	78806.5	126242
G12	18	57412.4	134539
H1	18	70577.2	155742
H2	18	55790.4	152778
H3	18	48586.9	142390
H4	18	42324	135414
H5	18	39595.1	137520
H6	18	48380.4	148375
H7	18	43182.5	143707
H8	18	42180.1	123558
H9	18	41720.4	127195
H10	18	60860.1	155032
H11	18	50980.3	143285
H12	18	54924.2	135898
A1	19	21807.9	106462
A2	19	33209.9	125957
A3	19	30715.4	118077
A4	19	35046.4	109948
A5	19	34383.2	114509
A6	19	50839.9	133612
A7	19	34440.4	120103
A8	19	176901	393982
A9	19	45571.9	130361
A10	19	37238.5	136630
A11	19	38198.1	142257
A12	19	41068.4	139994
B1	19	38938.9	136850
B2	19	38705.4	130423
B3	19	32961.6	134041
B4	19	30656.8	113426
B5	19	32572.9	139118
B6	19	25118.7	121204
B7	19	29357.1	121999
B8	19	109070	379925
B9	19	37221.3	120834
B10	19	42590.2	131426
B11	19	43495.1	143462
B12	19	47251.3	140842
C1	19	41514.8	140230
C2	19	43706	181790
C3	19	36066.9	129585
C4	19	31281	120180
C5	19	33810.9	128830
C6	19	30629.1	128078
C7	19	29702.7	122493
C8	19	33267.1	117995
C9	19	35543.3	118603
C10	19	36448.4	136638
C11	19	34243.8	146144
C12	19	45040.1	143887
D1	19	46928.5	146068
D2	19	34869.4	140052
D3	19	36922.6	133468
D4	19	31319.7	124890
D5	19	38316.9	131636
D6	19	40452.2	127833
D7	19	28114.9	122059
D8	19	29574.7	124713
D9	19	38494.4	119769
D10	19	50640.7	137475
D11	19	49714.1	134217
D12	19	154706	144513
E1	19	46840.3	143697
E2	19	45208.2	135229
E3	19	66548.7	132699
E4	19	34617.2	133419
E5	19	30215.5	134170
E6	19	32979.9	142192
E7	19	39213.1	122163
E8	19	34306.8	120805
E9	19	35972.8	121614
E10	19	42292.2	133882
E11	19	45726.7	128605
E12	19	63828.9	136052
F1	19	60367.2	157536
F2	19	58941.5	145348
F3	19	46863.5	137642
F4	19	36748.8	128244
F5	19	30315.6	133056
F6	19	63757.9	148414
F7	19	31435.7	127938
F8	19	30034.8	125563
F9	19	32169.1	118951
F10	19	55709.2	143130
F11	19	44506.8	122822
F12	19	66591.3	129300
G1	19	66249.1	146927
G2	19	75777.3	151411
G3	19	63227.4	116085
G4	19	29655.6	124869
G5	19	30012	126918
G6	19	31679.2	142872
G7	19	29205.8	123358
G8	19	38693.3	124171
G9	19	36174.4	117059
G10	19	80128.6	141814
G11	19	87926.7	126360
G12	19	70834.1	134884
H1	19	79543.3	155089
H2	19	63788	152987
H3	19	56192.1	142206
H4	19	46817.9	135453
H5	19	45115.4	137849
H6	19	54069.1	147967
H7	19	50336	143458
H8	19	48323.5	123412
H9	19	47016.4	126949
H10	19	69675.9	154807
H11	19	60556.7	143397
H12	19	65347.4	135119
A1	20	22030.2	105965
A2	20	33491	125806
A3	20	31018.2	118241
A4	20	35461.4	110134
A5	20	34566.6	114548
A6	20	50442	133629
A7	20	34604.1	120063
A8	20	176445	393620
A9	20	45862.4	130177
A10	20	39125.6	136429
A11	20	40509.1	141554
A12	20	43073.4	139581
B1	20	39186	137427
B2	20	38763.9	131039
B3	20	32965.8	134153
B4	20	30585.3	114003
B5	20	32973.7	139180
B6	20	25474	121660
B7	20	29751.8	122134
B8	20	109815	378731
B9	20	37253.4	120873
B10	20	44370.1	131067
B11	20	44693.8	143193
B12	20	48796.9	141006
C1	20	41247.3	140065
C2	20	43941.3	182112
C3	20	36794.5	129184
C4	20	31370	120274
C5	20	34214.5	128419
C6	20	30944.7	128197
C7	20	29750.3	122764
C8	20	33707.7	118307
C9	20	35562.4	118562
C10	20	37708.6	136915
C11	20	35582.3	146252
C12	20	46208.9	143154
D1	20	47495.9	146248
D2	20	35268.8	140429
D3	20	37574.5	133110
D4	20	31629.3	125175
D5	20	38777.2	131466
D6	20	40775.6	127542
D7	20	28345.2	122046
D8	20	29630.1	124858
D9	20	38750.1	120073
D10	20	56431.5	137386
D11	20	55287.3	134280
D12	20	160261	144338
E1	20	47623.5	144076
E2	20	45761.8	135289
E3	20	67287.1	132324
E4	20	34722.1	133322
E5	20	30478.9	134270
E6	20	33091	142711
E7	20	39120.5	122261
E8	20	34641.2	120917
E9	20	36204.4	121674
E10	20	48057.6	133808
E11	20	51767.4	128602
E12	20	69322.1	136045
F1	20	72238.8	157723
F2	20	69451.3	145106
F3	20	56712.3	137554
F4	20	36781.4	128523
F5	20	30416.7	133195
F6	20	63287.4	147993
F7	20	31323.5	127990
F8	20	30044.8	126060
F9	20	32282.3	119243
F10	20	71472.9	142581
F11	20	56505.8	122395
F12	20	79712.8	128938
G1	20	85754.8	146455
G2	20	94852.7	151087
G3	20	81732.3	115954
G4	20	29996.5	124789
G5	20	30269.7	126753
G6	20	31941.7	142887
G7	20	29462.2	123716
G8	20	38903.6	123982
G9	20	36239.4	117226
G10	20	105625	141831
G11	20	103626	126191
G12	20	92239.7	134466
H1	20	94903	155323
H2	20	79146.4	153037
H3	20	70074.8	142205
H4	20	55861.1	135466
H5	20	54572.4	137837
H6	20	64406.6	148054
H7	20	63624.9	143628
H8	20	59688.8	123883
H9	20	57867.6	126805
H10	20	84920.8	154737
H11	20	78200.1	143433
H12	20	83551.3	135164
A1	21	22135.9	106306
A2	21	33036.2	125271
A3	21	30680.4	118197
A4	21	35672.1	110029
A5	21	35175.8	114623
A6	21	50712.9	133392
A7	21	35032.7	119943
A8	21	176951	394269
A9	21	46105.4	130151
A10	21	43013.5	136415
A11	21	44497	141917
A12	21	47834.2	139158
B1	21	39558.2	137177
B2	21	39080.3	130652
B3	21	33005.4	133655
B4	21	30582.6	114271
B5	21	33023.5	139171
B6	21	25396.8	121314
B7	21	30123.4	121790
B8	21	110090	379411
B9	21	37688.5	120557
B10	21	47970.6	131338
B11	21	47044.9	142990
B12	21	52759.2	140856
C1	21	41368	139727
C2	21	43560	181609
C3	21	36692	129457
C4	21	31763.4	120755
C5	21	34327.5	128544
C6	21	31546.9	127957
C7	21	30194.6	122747
C8	21	33896.8	118278
C9	21	35893.2	118956
C10	21	40208.2	136496
C11	21	38210.4	146191
C12	21	48952.7	143259
D1	21	48830.9	146228
D2	21	36792.7	140295
D3	21	38486.7	133324
D4	21	32122.2	125647
D5	21	39098.3	131906
D6	21	40993.1	127614
D7	21	28400.1	122503
D8	21	29601.4	124552
D9	21	38682.3	120087
D10	21	67158	137348
D11	21	66249.2	134393
D12	21	170591	144166
E1	21	49044.6	143750
E2	21	47838.3	135282
E3	21	68367.6	132223
E4	21	35155.2	133506
E5	21	30711	134490
E6	21	33365.1	142652
E7	21	39308.5	122220
E8	21	34734.3	120954
E9	21	36533.4	121305
E10	21	58938.5	133764
E11	21	62643.9	128563
E12	21	79571.1	136154
F1	21	90834.9	157702
F2	21	86725.2	144961
F3	21	73164.2	137719
F4	21	36987.9	128312
F5	21	30844.6	133371
F6	21	63353.7	148214
F7	21	31740.8	128027
F8	21	30254.5	125851
F9	21	32509.5	119078
F10	21	95617.2	142829
F11	21	77388.6	122776
F12	21	100911	128937
G1	21	111256	145884
[truncated: 10,391 more rows]

## Sheet: Amplification Data
Block Type	96alum
Chemistry	SYBR_GREEN
Experiment File Name	D:\ShuJu\LZM\7 sample with IAA.eds
Experiment Run End Time	2023-08-17 00:01:40 AM CST
Instrument Type	sds7500
Passive Reference	ROX
Well	Cycle	Target Name	Rn	ΔRn
A1	1	SPX1	0.200108	4.78688e-05
A1	2	SPX1	0.197904	-0.00257812
A1	3	SPX1	0.200782	-0.000122849
A1	4	SPX1	0.204284	0.00295618
A1	5	SPX1	0.202013	0.000262664
A1	6	SPX1	0.201597	-0.000575628
A1	7	SPX1	0.201476	-0.0011191
A1	8	SPX1	0.20007	-0.0029478
A1	9	SPX1	0.20762	0.00417958
A1	10	SPX1	0.205201	0.00133735
A1	11	SPX1	0.204905	0.000619309
A1	12	SPX1	0.205202	0.000493501
A1	13	SPX1	0.205306	0.000174261
A1	14	SPX1	0.206254	0.000699648
A1	15	SPX1	0.204044	-0.00193307
A1	16	SPX1	0.20398	-0.00241897
A1	17	SPX1	0.201009	-0.00581276
A1	18	SPX1	0.206609	-0.000635426
A1	19	SPX1	0.204842	-0.00282554
A1	20	SPX1	0.2079	-0.000189415
A1	21	SPX1	0.208228	-0.000284154
A1	22	SPX1	0.208495	-0.000439675
A1	23	SPX1	0.21794	0.00858189
A1	24	SPX1	0.223248	0.0134681
A1	25	SPX1	0.240519	0.0303163
A1	26	SPX1	0.279329	0.0687034
A1	27	SPX1	0.343763	0.132715
A1	28	SPX1	0.440162	0.228691
A1	29	SPX1	0.573914	0.36202
A1	30	SPX1	0.697994	0.485678
A1	31	SPX1	0.779644	0.566905
A1	32	SPX1	0.854218	0.641056
A1	33	SPX1	0.952388	0.738804
A1	34	SPX1	1.04197	0.827963
A1	35	SPX1	1.1467	0.932271
A1	36	SPX1	1.23626	1.0214
A1	37	SPX1	1.31131	1.09604
A1	38	SPX1	1.37922	1.16352
A1	39	SPX1	1.44677	1.23065
A1	40	SPX1	1.48458	1.26804
A2	1	SPX1	0.267772	-0.000183248
A2	2	SPX1	0.268793	0.00104429
A2	3	SPX1	0.268437	0.000893878
A2	4	SPX1	0.267115	-0.000221677
A2	5	SPX1	0.264783	-0.00234837
A2	6	SPX1	0.268631	0.00170619
A2	7	SPX1	0.265322	-0.00139635
A2	8	SPX1	0.269417	0.00290458
A2	9	SPX1	0.268414	0.00210704
A2	10	SPX1	0.269175	0.00307428
A2	11	SPX1	0.266479	0.000584842
A2	12	SPX1	0.262812	-0.00287663
A2	13	SPX1	0.264696	-0.00078665
A2	14	SPX1	0.260489	-0.00478677
A2	15	SPX1	0.26396	-0.00110999
A2	16	SPX1	0.265944	0.00108054
A2	17	SPX1	0.263823	-0.000834938
A2	18	SPX1	0.261032	-0.0034193
A2	19	SPX1	0.263661	-0.000584618
A2	20	SPX1	0.266211	0.00217172
A2	21	SPX1	0.263718	-0.000115965
A2	22	SPX1	0.267586	0.0039582
A2	23	SPX1	0.272536	0.00911457
A2	24	SPX1	0.2828	0.0195853
A2	25	SPX1	0.303414	0.0404048
A2	26	SPX1	0.342137	0.0793336
A2	27	SPX1	0.407151	0.144554
A2	28	SPX1	0.518909	0.256518
A2	29	SPX1	0.678775	0.41659
A2	30	SPX1	0.852514	0.590535
A2	31	SPX1	0.971028	0.709255
A2	32	SPX1	1.05474	0.793177
A2	33	SPX1	1.18082	0.919455
A2	34	SPX1	1.30496	1.04381
A2	35	SPX1	1.44241	1.18146
A2	36	SPX1	1.55315	1.29241
A2	37	SPX1	1.65758	1.39704
A2	38	SPX1	1.75283	1.4925
A2	39	SPX1	1.8349	1.57478
A2	40	SPX1	1.89841	1.63849
A3	1	SPX1	0.254254	-0.0043112
A3	2	SPX1	0.256371	-0.00236839
A3	3	SPX1	0.257522	-0.00139196
A3	4	SPX1	0.260149	0.0010608
A3	5	SPX1	0.261244	0.00198106
A3	6	SPX1	0.258198	-0.00123932
A3	7	SPX1	0.260933	0.00132099
A3	8	SPX1	0.258872	-0.000914132
A3	9	SPX1	0.262388	0.00242691
A3	10	SPX1	0.262399	0.00226428
A3	11	SPX1	0.25719	-0.00312
A3	12	SPX1	0.260669	0.000184808
A3	13	SPX1	0.258437	-0.00222188
A3	14	SPX1	0.259149	-0.00168399
A3	15	SPX1	0.263696	0.00268855
A3	16	SPX1	0.25977	-0.00141134
A3	17	SPX1	0.260175	-0.00118121
A3	18	SPX1	0.260422	-0.00110858
A3	19	SPX1	0.260131	-0.00157428
A3	20	SPX1	0.26233	0.000450216
A3	21	SPX1	0.259571	-0.00248252
A3	22	SPX1	0.26818	0.0059516
A3	23	SPX1	0.273088	0.0106854
A3	24	SPX1	0.286294	0.0237165
A3	25	SPX1	0.316805	0.054053
A3	26	SPX1	0.361183	0.0982572
A3	27	SPX1	0.445573	0.182473
A3	28	SPX1	0.574702	0.311427
A3	29	SPX1	0.759637	0.496188
A3	30	SPX1	0.930325	0.666701
A3	31	SPX1	1.03272	0.768922
A3	32	SPX1	1.12085	0.856877
A3	33	SPX1	1.25947	0.99532
A3	34	SPX1	1.37415	1.10983
A3	35	SPX1	1.51075	1.24626
A3	36	SPX1	1.62275	1.35808
A3	37	SPX1	1.71904	1.45419
A3	38	SPX1	1.80152	1.5365
A3	39	SPX1	1.88651	1.62132
A3	40	SPX1	1.95004	1.68467
A4	1	SPX2	0.324721	-0.000497376
A4	2	SPX2	0.324424	-0.00048808
A4	3	SPX2	0.325102	0.000495424
A4	4	SPX2	0.325326	0.00102456
A4	5	SPX2	0.327191	0.00319503
A4	6	SPX2	0.323842	0.000151349
A4	7	SPX2	0.32413	0.000745038
A4	8	SPX2	0.322756	-0.000323824
A4	9	SPX2	0.321237	-0.00153678
A4	10	SPX2	0.320821	-0.00164759
A4	11	SPX2	0.321479	-0.000684171
A4	12	SPX2	0.321574	-0.000283541
A4	13	SPX2	0.320471	-0.00108099
A4	14	SPX2	0.319859	-0.00138784
A4	15	SPX2	0.318713	-0.00222758
A4	16	SPX2	0.321073	0.0004371
A4	17	SPX2	0.319988	-0.000342382
A4	18	SPX2	0.316784	-0.00324066
A4	19	SPX2	0.318756	-0.000962931
A4	20	SPX2	0.321985	0.00257189
A4	21	SPX2	0.324206	0.0050979
A4	22	SPX2	0.327598	0.00879574
A4	23	SPX2	0.341971	0.0234737
A4	24	SPX2	0.360768	0.0425764
A4	25	SPX2	0.392179	0.0742935
A4	26	SPX2	0.462439	0.144859
A4	27	SPX2	0.570612	0.253337
A4	28	SPX2	0.744094	0.427124
A4	29	SPX2	0.984334	0.66767
A4	30	SPX2	1.22805	0.911691
A4	31	SPX2	1.46276	1.14671
A4	32	SPX2	1.65603	1.34028
A4	33	SPX2	1.82793	1.51249
A4	34	SPX2	1.96251	1.64737
A4	35	SPX2	2.07501	1.76018
A4	36	SPX2	2.16271	1.84818
A4	37	SPX2	2.22724	1.91302
A4	38	SPX2	2.28265	1.96873
A4	39	SPX2	2.3168	2.00319
A4	40	SPX2	2.35721	2.04391
A5	1	SPX2	0.300608	-0.00595507
A5	2	SPX2	0.303226	-0.00318701
A5	3	SPX2	0.307818	0.00155486
A5	4	SPX2	0.306983	0.00087032
A5	5	SPX2	0.307764	0.0018016
A5	6	SPX2	0.307984	0.00217144
A5	7	SPX2	0.304888	-0.00077474
A5	8	SPX2	0.303622	-0.00189147
A5	9	SPX2	0.30553	0.000166993
A5	10	SPX2	0.305187	-2.63747e-05
A5	11	SPX2	0.307491	0.00242807
A5	12	SPX2	0.303366	-0.00154739
A5	13	SPX2	0.303029	-0.00173417
A5	14	SPX2	0.302824	-0.00178907
A5	15	SPX2	0.303695	-0.000768355
A5	16	SPX2	0.301922	-0.00239217
A5	17	SPX2	0.302169	-0.00199462
A5	18	SPX2	0.300372	-0.0036416
A5	19	SPX2	0.300266	-0.00359795
A5	20	SPX2	0.301764	-0.00195007
A5	21	SPX2	0.306883	0.00331912
A5	22	SPX2	0.31321	0.00979557
A5	23	SPX2	0.321973	0.0187092
A5	24	SPX2	0.342115	0.0390006
A5	25	SPX2	0.378969	0.0760048
A5	26	SPX2	0.444022	0.141208
A5	27	SPX2	0.550026	0.247361
A5	28	SPX2	0.721908	0.419393
A5	29	SPX2	0.966372	0.664007
A5	30	SPX2	1.22176	0.919542
A5	31	SPX2	1.47393	1.17187
A5	32	SPX2	1.67564	1.37372
A5	33	SPX2	1.85949	1.55773
A5	34	SPX2	1.99034	1.68873
A5	35	SPX2	2.10698	1.80551
A5	36	SPX2	2.19737	1.89606
A5	37	SPX2	2.25001	1.94884
A5	38	SPX2	2.30617	2.00516
A5	39	SPX2	2.33728	2.03642
A5	40	SPX2	2.37017	2.06945
A6	1	SPX2	0.388478	-0.0116763
A6	2	SPX2	0.396935	-0.00212767
A6	3	SPX2	0.398621	0.000648718
A6	4	SPX2	0.399193	0.00231205
A6	5	SPX2	0.396252	0.000461633
A6	6	SPX2	0.397947	0.00324702
A6	7	SPX2	0.394311	0.000702271
A6	8	SPX2	0.390852	-0.00166629
A6	9	SPX2	0.391323	-0.000103779
A6	10	SPX2	0.39048	0.000143408
A6	11	SPX2	0.387721	-0.00152495
A6	12	SPX2	0.386529	-0.00162555
A6	13	SPX2	0.386218	-0.000846307
A6	14	SPX2	0.38456	-0.00141299
A6	15	SPX2	0.383184	-0.0016978
A6	16	SPX2	0.380132	-0.00365894
A6	17	SPX2	0.383083	0.000382024
A6	18	SPX2	0.377774	-0.00383601
A6	19	SPX2	0.380505	-1.38867e-05
A6	20	SPX2	0.37748	-0.00194859
A6	21	SPX2	0.380179	0.00184123
A6	22	SPX2	0.385843	0.00859674
A6	23	SPX2	0.395193	0.0190376
A6	24	SPX2	0.408621	0.0335561
A6	25	SPX2	0.439861	0.0658872
A6	26	SPX2	0.494223	0.12134
A6	27	SPX2	0.584975	0.213183
A6	28	SPX2	0.727003	0.356301
A6	29	SPX2	0.927446	0.557836
A6	30	SPX2	1.14298	0.774462
A6	31	SPX2	1.36299	0.995556
A6	32	SPX2	1.53122	1.16488
A6	33	SPX2	1.7029	1.33765
A6	34	SPX2	1.83612	1.47196
A6	35	SPX2	1.94161	1.57854
A6	36	SPX2	2.0227	1.66073
A6	37	SPX2	2.10142	1.74054
A6	38	SPX2	2.14408	1.78429
A6	39	SPX2	2.19024	1.83154
A6	40	SPX2	2.2182	1.86059
A7	1	SPX3	0.28566	-0.00539269
A7	2	SPX3	0.289295	-0.00166774
A7	3	SPX3	0.292662	0.00178852
A7	4	SPX3	0.291747	0.000963916
A7	5	SPX3	0.292245	0.0015517
A7	6	SPX3	0.291665	0.00106163
A7	7	SPX3	0.291757	0.00124303
A7	8	SPX3	0.291061	0.000637019
A7	9	SPX3	0.289188	-0.00114535
A7	10	SPX3	0.289681	-0.000562239
A7	11	SPX3	0.288133	-0.00202077
A7	12	SPX3	0.291466	0.00140262
A7	13	SPX3	0.287668	-0.00230641
A7	14	SPX3	0.287165	-0.00271906
A7	15	SPX3	0.288732	-0.0010625
A7	16	SPX3	0.287283	-0.00242117
A7	17	SPX3	0.287897	-0.00171677
A7	18	SPX3	0.28655	-0.00297437
A7	19	SPX3	0.286757	-0.00267719
A7	20	SPX3	0.288215	-0.00112935
A7	21	SPX3	0.292078	0.00282395
A7	22	SPX3	0.298427	0.0092628
A7	23	SPX3	0.308372	0.0192973
A7	24	SPX3	0.334214	0.0452292
A7	25	SPX3	0.378461	0.0895661
A7	26	SPX3	0.455077	0.166273
A7	27	SPX3	0.593331	0.304616
A7	28	SPX3	0.804661	0.516036
A7	29	SPX3	1.06709	0.778554
A7	30	SPX3	1.31689	1.02845
A7	31	SPX3	1.5227	1.23434
A7	32	SPX3	1.68295	1.39469
A7	33	SPX3	1.83969	1.55151
A7	34	SPX3	1.94728	1.65919
A7	35	SPX3	2.03465	1.74666
A7	36	SPX3	2.09697	1.80907
A7	37	SPX3	2.1548	1.86699
A7	38	SPX3	2.18769	1.89996
A7	39	SPX3	2.21228	1.92465
A7	40	SPX3	2.24168	1.95413
A8	1	SPX3	0.463505	-0.00461305
A8	2	SPX3	0.464998	-0.00199279
A8	3	SPX3	0.46659	0.000726463
A8	4	SPX3	0.466137	0.0014014
A8	5	SPX3	0.465362	0.00175349
A8	6	SPX3	0.46176	-0.00072126
A8	7	SPX3	0.461253	-0.000101188
A8	8	SPX3	0.459448	-0.000778829
A8	9	SPX3	0.457386	-0.0017136
A8	10	SPX3	0.460989	0.00301615
A8	11	SPX3	0.455194	-0.00165101
A8	12	SPX3	0.456948	0.00122963
A8	13	SPX3	0.45359	-0.00100119
A8	14	SPX3	0.4503	-0.00316376
A8	15	SPX3	0.449786	-0.00254995
A8	16	SPX3	0.451791	0.000581685
A8	17	SPX3	0.447956	-0.00212615
A8	18	SPX3	0.448075	-0.000879573
A8	19	SPX3	0.449008	0.00118043
A8	20	SPX3	0.448263	0.00156295
A8	21	SPX3	0.448807	0.00323432
A8	22	SPX3	0.457203	0.0127571
A8	23	SPX3	0.471153	0.0278343
A8	24	SPX3	0.49828	0.0560886
A8	25	SPX3	0.539745	0.0986811
A8	26	SPX3	0.628735	0.188798
A8	27	SPX3	0.778661	0.339851
A8	28	SPX3	0.993396	0.555714
A8	29	SPX3	1.26656	0.830003
A8	30	SPX3	1.52266	1.08724
A8	31	SPX3	1.72055	1.28625
A8	32	SPX3	1.88404	1.45087
A8	33	SPX3	2.02209	1.59005
A8	34	SPX3	2.12311	1.69219
A8	35	SPX3	2.20817	1.77838
A8	36	SPX3	2.26941	1.84074
A8	37	SPX3	2.3182	1.89066
A8	38	SPX3	2.35471	1.9283
A8	39	SPX3	2.38437	1.95909
A8	40	SPX3	2.40186	1.97771
A9	1	SPX3	0.347899	-0.00234936
A9	2	SPX3	0.350389	0.000132172
A9	3	SPX3	0.349724	-0.000541678
A9	4	SPX3	0.351094	0.000819046
A9	5	SPX3	0.353191	0.00290742
A9	6	SPX3	0.350037	-0.000255099
A9	7	SPX3	0.351516	0.00121521
A9	8	SPX3	0.350245	-6.5089e-05
A9	9	SPX3	0.350255	-6.34995e-05
A9	10	SPX3	0.348281	-0.00204618
A9	11	SPX3	0.3519	0.00156406
A9	12	SPX3	0.349585	-0.000759622
A9	13	SPX3	0.34893	-0.00142337
A9	14	SPX3	0.346798	-0.00356433
A9	15	SPX3	0.349282	-0.00108906
A9	16	SPX3	0.349814	-0.000565956
A9	17	SPX3	0.350349	-3.92201e-05
A9	18	SPX3	0.349412	-0.000985523
A9	19	SPX3	0.349583	-0.000822912
A9	20	SPX3	0.352309	0.001894
A9	21	SPX3	0.354245	0.0038218
A9	22	SPX3	0.359842	0.00940939
A9	23	SPX3	0.372062	0.0216205
A9	24	SPX3	0.394916	0.044466
A9	25	SPX3	0.435261	0.0848028
A9	26	SPX3	0.513926	0.163458
A9	27	SPX3	0.644022	0.293546
A9	28	SPX3	0.853104	0.502619
A9	29	SPX3	1.14217	0.791675
A9	30	SPX3	1.44501	1.09451
A9	31	SPX3	1.71191	1.3614
A9	32	SPX3	1.89764	1.54712
A9	33	SPX3	2.04376	1.69323
A9	34	SPX3	2.15807	1.80754
A9	35	SPX3	2.24412	1.89357
A9	36	SPX3	2.31491	1.96435
A9	37	SPX3	2.35886	2.0083
A9	38	SPX3	2.40048	2.04991
A9	39	SPX3	2.42546	2.07487
A9	40	SPX3	2.43858	2.08799
A10	1	SPX4	0.24698	-0.00428657
A10	2	SPX4	0.247617	-0.00405881
A10	3	SPX4	0.25224	0.000155144
A10	4	SPX4	0.252434	-5.96001e-05
A10	5	SPX4	0.253648	0.000745342
A10	6	SPX4	0.252542	-0.000770005
A10	7	SPX4	0.254472	0.000750312
A10	8	SPX4	0.254355	0.000224462
A10	9	SPX4	0.253158	-0.00138226
A10	10	SPX4	0.253249	-0.00169961
A10	11	SPX4	0.257691	0.00233268
A10	12	SPX4	0.257349	0.0015815
A10	13	SPX4	0.254463	-0.00171353
A10	14	SPX4	0.256819	0.000233263
A10	15	SPX4	0.254312	-0.00268267
A10	16	SPX4	0.258581	0.00117689
A10	17	SPX4	0.258922	0.00110809
A10	18	SPX4	0.261457	0.00323402
A10	19	SPX4	0.272549	0.0139169
A10	20	SPX4	0.286784	0.0277427
A10	21	SPX4	0.315314	0.0558641
A10	22	SPX4	0.370999	0.111139
A10	23	SPX4	0.472539	0.21227
A10	24	SPX4	0.635041	0.374363
A10	25	SPX4	0.841805	0.580718
A10	26	SPX4	1.0372	0.775704
A10	27	SPX4	1.19367	0.931762
A10	28	SPX4	1.33889	1.07658
A10	29	SPX4	1.49192	1.2292
A10	30	SPX4	1.6456	1.38247
A10	31	SPX4	1.77822	1.51467
A10	32	SPX4	1.88527	1.62132
A10	33	SPX4	1.98711	1.72275
A10	34	SPX4	2.05674	1.79197
A10	35	SPX4	2.13004	1.86486
A10	36	SPX4	2.18968	1.92409
A10	37	SPX4	2.2363	1.9703
A10	38	SPX4	2.27103	2.00462
A10	39	SPX4	2.3125	2.04568
A10	40	SPX4	2.32685	2.05963
A11	1	SPX4	0.248359	-0.00152368
A11	2	SPX4	0.248557	-0.00166363
A11	3	SPX4	0.249621	-0.000937262
A11	4	SPX4	0.250686	-0.000210713
A11	5	SPX4	0.253336	0.00210104
A11	6	SPX4	0.250184	-0.00138946
A11	7	SPX4	0.250218	-0.00169355
A11	8	SPX4	0.253246	0.000996337
A11	9	SPX4	0.251491	-0.00109691
A11	10	SPX4	0.255566	0.00263963
A11	11	SPX4	0.255273	0.00200918
A11	12	SPX4	0.253848	0.000245224
A11	13	SPX4	0.252524	-0.00141633
A11	14	SPX4	0.252944	-0.0013346
A11	15	SPX4	0.254469	-0.000147738
A11	16	SPX4	0.255837	0.000882125
A11	17	SPX4	0.254646	-0.000646988
A11	18	SPX4	0.257196	0.00156472
A11	19	SPX4	0.268515	0.0125457
A11	20	SPX4	0.286174	0.0298665
A11	21	SPX4	0.313543	0.0568967
A11	22	SPX4	0.369472	0.112488
A11	23	SPX4	0.473487	0.216165
A11	24	SPX4	0.642631	0.384971
A11	25	SPX4	0.861941	0.603942
A11	26	SPX4	1.06856	0.810223
A11	27	SPX4	1.23534	0.976663
A11	28	SPX4	1.38276	1.12374
A11	29	SPX4	1.54264	1.28329
A11	30	SPX4	1.69555	1.43586
A11	31	SPX4	1.84392	1.58389
A11	32	SPX4	1.94879	1.68843
A11	33	SPX4	2.05855	1.79785
A11	34	SPX4	2.13225	1.87121
A11	35	SPX4	2.19887	1.93748
A11	36	SPX4	2.26156	1.99984
A11	37	SPX4	2.31874	2.05668
A11	38	SPX4	2.35472	2.09233
A11	39	SPX4	2.38126	2.11852
A11	40	SPX4	2.4197	2.15663
A12	1	SPX4	0.263749	-0.00258471
A12	2	SPX4	0.26868	0.00156401
A12	3	SPX4	0.266463	-0.0014335
A12	4	SPX4	0.269548	0.000869564
A12	5	SPX4	0.270576	0.00111651
A12	6	SPX4	0.269209	-0.00103158
A12	7	SPX4	0.271947	0.000924733
A12	8	SPX4	0.271508	-0.00029564
A12	9	SPX4	0.273908	0.00132278
A12	10	SPX4	0.274632	0.00126514
A12	11	SPX4	0.272137	-0.00201109
A12	12	SPX4	0.274198	-0.000730897
A12	13	SPX4	0.273841	-0.00186976
A12	14	SPX4	0.275785	-0.000707141
A12	15	SPX4	0.279083	0.00180946
A12	16	SPX4	0.280446	0.0023918
A12	17	SPX4	0.277215	-0.00162037
A12	18	SPX4	0.279327	-0.000289782
A12	19	SPX4	0.293359	0.0129606
A12	20	SPX4	0.308592	0.0274117
A12	21	SPX4	0.343741	0.0617794
A12	22	SPX4	0.403646	0.120904
A12	23	SPX4	0.513293	0.229769
A12	24	SPX4	0.692745	0.40844
A12	25	SPX4	0.910858	0.625772
A12	26	SPX4	1.10302	0.817156
A12	27	SPX4	1.27141	0.984764
A12	28	SPX4	1.4182	1.13077
A12	29	SPX4	1.58956	1.30135
A12	30	SPX4	1.74158	1.45258
A12	31	SPX4	1.88624	1.59646
A12	32	SPX4	2.00059	1.71003
A12	33	SPX4	2.10336	1.81202
A12	34	SPX4	2.17957	1.88745
A12	35	SPX4	2.25303	1.96013
A12	36	SPX4	2.31182	2.01814
A12	37	SPX4	2.36444	2.06998
A12	38	SPX4	2.39226	2.09702
A12	39	SPX4	2.44121	2.14518
A12	40	SPX4	2.4612	2.1644
B1	1	SPX1	0.278588	0.000518289
B1	2	SPX1	0.281658	0.00323885
B1	3	SPX1	0.281833	0.00306383
B1	4	SPX1	0.280736	0.00161681
B1	5	SPX1	0.275649	-0.00382
B1	6	SPX1	0.282117	0.00229824
B1	7	SPX1	0.279029	-0.00113937
B1	8	SPX1	0.279443	-0.00107529
B1	9	SPX1	0.282349	0.00148106
B1	10	SPX1	0.283413	0.00219477
B1	11	SPX1	0.282039	0.000471214
B1	12	SPX1	0.280784	-0.00113418
B1	13	SPX1	0.282447	0.00017981
B1	14	SPX1	0.283531	0.000913544
B1	15	SPX1	0.278047	-0.00491981
B1	16	SPX1	0.281427	-0.00189017
B1	17	SPX1	0.28195	-0.00171657
B1	18	SPX1	0.2776	-0.00641654
B1	19	SPX1	0.284538	0.000171086
B1	20	SPX1	0.28514	0.000423483
B1	21	SPX1	0.288373	0.00330668
B1	22	SPX1	0.291408	0.00599139
B1	23	SPX1	0.295089	0.00932297
B1	24	SPX1	0.316547	0.0304307
B1	25	SPX1	0.341501	0.0550352
B1	26	SPX1	0.393935	0.107119
B1	27	SPX1	0.490999	0.203833
B1	28	SPX1	0.631362	0.343847
B1	29	SPX1	0.806854	0.518989
B1	30	SPX1	0.959449	0.671234
B1	31	SPX1	1.04585	0.757284
B1	32	SPX1	1.14128	0.852366
B1	33	SPX1	1.2665	0.977233
B1	34	SPX1	1.39088	1.10127
B1	35	SPX1	1.51443	1.22447
B1	36	SPX1	1.62062	1.33031
B1	37	SPX1	1.71494	1.42428
B1	38	SPX1	1.79151	1.5005
B1	39	SPX1	1.86034	1.56898
B1	40	SPX1	1.9158	1.62408
B2	1	SPX1	0.310752	0.00192976
B2	2	SPX1	0.308886	0.000624471
B2	3	SPX1	0.307325	-0.000374391
B2	4	SPX1	0.30967	0.00253189
B2	5	SPX1	0.307684	0.00110713
B2	6	SPX1	0.306729	0.000713224
B2	7	SPX1	0.305726	0.000271576
B2	8	SPX1	0.30446	-0.000432987
B2	9	SPX1	0.305568	0.00123623
B2	10	SPX1	0.303928	0.000157919
B2	11	SPX1	0.301929	-0.00128044
B2	12	SPX1	0.297948	-0.00469958
B2	13	SPX1	0.300328	-0.00175812
B2	14	SPX1	0.30077	-0.000754686
B2	15	SPX1	0.30059	-0.000373432
B2	16	SPX1	0.302271	0.00186919
B2	17	SPX1	0.300704	0.00086353
B2	18	SPX1	0.297868	-0.00141147
B2	19	SPX1	0.296768	-0.00195051
B2	20	SPX1	0.29582	-0.00233678
B2	21	SPX1	0.299118	0.00152204
B2	22	SPX1	0.302134	0.00509966
B2	23	SPX1	0.311275	0.0148026
B2	24	SPX1	0.325883	0.0299711
B2	25	SPX1	0.350661	0.055311
B2	26	SPX1	0.397671	0.102882
B2	27	SPX1	0.481289	0.187061
B2	28	SPX1	0.604553	0.310887
B2	29	SPX1	0.745879	0.452774
B2	30	SPX1	0.842183	0.549639
B2	31	SPX1	0.918359	0.626377
B2	32	SPX1	0.99927	0.707849
B2	33	SPX1	1.11782	0.826965
B2	34	SPX1	1.22584	0.935537
B2	35	SPX1	1.33748	1.04774
B2	36	SPX1	1.43502	1.14584
B2	37	SPX1	1.53013	1.24152
B2	38	SPX1	1.60903	1.32098
B2	39	SPX1	1.67798	1.39048
B2	40	SPX1	1.75178	1.46485
B3	1	SPX1	0.234956	0.00181057
B3	2	SPX1	0.237337	0.00365337
B3	3	SPX1	0.235357	0.00113513
B3	4	SPX1	0.233998	-0.000761642
B3	5	SPX1	0.235395	9.71367e-05
B3	6	SPX1	0.238349	0.00251355
B3	7	SPX1	0.238568	0.00219482
B3	8	SPX1	0.236607	-0.000304644
B3	9	SPX1	0.238009	0.000559082
B3	10	SPX1	0.237266	-0.000721648
B3	11	SPX1	0.236746	-0.00177926
B3	12	SPX1	0.237814	-0.00124929
B3	13	SPX1	0.238365	-0.00123613
B3	14	SPX1	0.240522	0.000383118
B3	15	SPX1	0.238939	-0.0017378
B3	16	SPX1	0.237765	-0.00345011
B3	17	SPX1	0.23725	-0.00450296
B3	18	SPX1	0.242668	0.000376511
B3	19	SPX1	0.245908	0.00307867
B3	20	SPX1	0.245733	0.0023659
B3	21	SPX1	0.246944	0.00303957
B3	22	SPX1	0.24928	0.00483669
B3	23	SPX1	0.259811	0.0148297
B3	24	SPX1	0.277814	0.0322948
B3	25	SPX1	0.299828	0.0537711
B3	26	SPX1	0.355235	0.108641
B3	27	SPX1	0.44808	0.200948
B3	28	SPX1	0.598849	0.351178
B3	29	SPX1	0.789174	0.540965
B3	30	SPX1	0.957278	0.708532
B3	31	SPX1	1.06474	0.815453
B3	32	SPX1	1.15936	0.909542
B3	33	SPX1	1.3017	1.05134
B3	34	SPX1	1.433	1.1821
B3	35	SPX1	1.55624	1.30481
B3	36	SPX1	1.67751	1.42554
B3	37	SPX1	1.77323	1.52072
B3	38	SPX1	1.87148	1.61843
B3	39	SPX1	1.94585	1.69226
B3	40	SPX1	2.00848	1.75436
B4	1	SPX2	0.261553	-0.00872135
B4	2	SPX2	0.262217	-0.0079779
B4	3	SPX2	0.269285	-0.000830411
B4	4	SPX2	0.269694	-0.000341595
B4	5	SPX2	0.2727	0.00274303
B4	6	SPX2	0.269776	-0.000101513
B4	7	SPX2	0.271717	0.00191959
B4	8	SPX2	0.271059	0.00134023
B4	9	SPX2	0.268158	-0.00148149
B4	10	SPX2	0.270361	0.000801517
B4	11	SPX2	0.268842	-0.000638086
B4	12	SPX2	0.267631	-0.00177001
B4	13	SPX2	0.26849	-0.000832045
B4	14	SPX2	0.269087	-0.000155028
B4	15	SPX2	0.267916	-0.00124654
B4	16	SPX2	0.266167	-0.00291711
B4	17	SPX2	0.269375	0.000370827
B4	18	SPX2	0.26756	-0.0013646
B4	19	SPX2	0.270279	0.0014331
B4	20	SPX2	0.268286	-0.000480305
B4	21	SPX2	0.267632	-0.00105502
B4	22	SPX2	0.273213	0.00460546
B4	23	SPX2	0.281845	0.0133171
B4	24	SPX2	0.29414	0.0256913
B4	25	SPX2	0.318202	0.0498329
B4	26	SPX2	0.366863	0.0985725
B4	27	SPX2	0.442185	0.173974
B4	28	SPX2	0.580407	0.312276
B4	29	SPX2	0.790409	0.522357
B4	30	SPX2	1.0582	0.790227
B4	31	SPX2	1.35091	1.08301
B4	32	SPX2	1.5957	1.32789
B4	33	SPX2	1.81902	1.55129
B4	34	SPX2	1.97361	1.70596
B4	35	SPX2	2.09803	1.83046
B4	36	SPX2	2.20092	1.93343
B4	37	SPX2	2.27358	2.00616
B4	38	SPX2	2.34537	2.07804
B4	39	SPX2	2.38881	2.12155
B4	40	SPX2	2.42294	2.15576
B5	1	SPX2	0.23295	0.00176579
B5	2	SPX2	0.23439	0.00292235
B5	3	SPX2	0.23116	-0.000590575
B5	4	SPX2	0.233554	0.00152076
B5	5	SPX2	0.23208	-0.000235602
B5	6	SPX2	0.23186	-0.000738465
B5	7	SPX2	0.236538	0.00365662
B5	8	SPX2	0.233486	0.000321929
B5	9	SPX2	0.233243	-0.000203703
B5	10	SPX2	0.232767	-0.000963105
B5	11	SPX2	0.233521	-0.000491357
B5	12	SPX2	0.233081	-0.00121459
B5	13	SPX2	0.23499	0.000412247
B5	14	SPX2	0.23367	-0.00119102
B5	15	SPX2	0.232684	-0.00245994
B5	16	SPX2	0.236619	0.001193
B5	17	SPX2	0.236795	0.00108551
B5	18	SPX2	0.232934	-0.00305771
B5	19	SPX2	0.234138	-0.00213672
B5	20	SPX2	0.236914	0.000356784
B5	21	SPX2	0.237288	0.000447255
B5	22	SPX2	0.241412	0.00428869
B5	23	SPX2	0.244742	0.00733569
B5	24	SPX2	0.256722	0.0190335
B5	25	SPX2	0.275008	0.037036
B5	26	SPX2	0.311289	0.0730349
B5	27	SPX2	0.370923	0.132386
B5	28	SPX2	0.475876	0.237056
B5	29	SPX2	0.648793	0.40969
B5	30	SPX2	0.882714	0.643329
B5	31	SPX2	1.16135	0.921681
B5	32	SPX2	1.41447	1.17451
B5	33	SPX2	1.62984	1.3896
B5	34	SPX2	1.78524	1.54472
B5	35	SPX2	1.91963	1.67883
B5	36	SPX2	2.00343	1.76235
B5	37	SPX2	2.08526	1.84389
B5	38	SPX2	2.13097	1.88932
B5	39	SPX2	2.18037	1.93844
B5	40	SPX2	2.21226	1.97005
B6	1	SPX2	0.205877	-0.00158787
B6	2	SPX2	0.206766	-0.000870687
B6	3	SPX2	0.205351	-0.00245767
B6	4	SPX2	0.210545	0.00256499
B6	5	SPX2	0.206418	-0.0017339
B6	6	SPX2	0.210686	0.00236279
B6	7	SPX2	0.20735	-0.00114505
B6	8	SPX2	0.207805	-0.000861178
B6	9	SPX2	0.208818	-2.0198e-05
B6	10	SPX2	0.210265	0.00125503
B6	11	SPX2	0.211123	0.00194161
B6	12	SPX2	0.209401	4.77151e-05
B6	13	SPX2	0.207552	-0.00197258
B6	14	SPX2	0.213788	0.00409134
B6	15	SPX2	0.207886	-0.00198231
B6	16	SPX2	0.210092	5.21967e-05
B6	17	SPX2	0.210882	0.00067021
B6	18	SPX2	0.208932	-0.00145089
B6	19	SPX2	0.207243	-0.00331149
B6	20	SPX2	0.209387	-0.00133998
B6	21	SPX2	0.209348	-0.00155032
B6	22	SPX2	0.21591	0.00483969
B6	23	SPX2	0.219579	0.00833726
B6	24	SPX2	0.232394	0.020981
B6	25	SPX2	0.249683	0.038098
B6	26	SPX2	0.285135	0.0733783
B6	27	SPX2	0.346439	0.13451
B6	28	SPX2	0.449566	0.237466
B6	29	SPX2	0.617119	0.404847
B6	30	SPX2	0.833608	0.621164
B6	31	SPX2	1.08461	0.871991
B6	32	SPX2	1.30987	1.09709
B6	33	SPX2	1.53275	1.31979
B6	34	SPX2	1.7131	1.49997
B6	35	SPX2	1.8699	1.6566
B6	36	SPX2	1.99747	1.78399
B6	37	SPX2	2.08908	1.87543
B6	38	SPX2	2.16843	1.95461
B6	39	SPX2	2.2268	2.01281
B6	40	SPX2	2.26886	2.0547
B7	1	SPX3	0.240958	0.00134399
B7	2	SPX3	0.242141	0.00232803
B7	3	SPX3	0.243481	0.00346963
B7	4	SPX3	0.238965	-0.00124563
B7	5	SPX3	0.241753	0.00134399
B7	6	SPX3	0.240264	-0.000343896
B7	7	SPX3	0.241734	0.000926738
B7	8	SPX3	0.240359	-0.000646978
B7	9	SPX3	0.242142	0.000937266
B7	10	SPX3	0.242539	0.00113522
B7	11	SPX3	0.241249	-0.000353837
B7	12	SPX3	0.240908	-0.000893173
B7	13	SPX3	0.241078	-0.000922159
B7	14	SPX3	0.239771	-0.00242803
B7	15	SPX3	0.241924	-0.000474431
B7	16	SPX3	0.239416	-0.00318157
B7	17	SPX3	0.240862	-0.00193438
B7	18	SPX3	0.239159	-0.00383626
B7	19	SPX3	0.240633	-0.00256052
B7	20	SPX3	0.243599	0.000206356
B7	21	SPX3	0.247338	0.00374614
B7	22	SPX3	0.250846	0.00705552
B7	23	SPX3	0.258361	0.0143714
B7	24	SPX3	0.277623	0.0334349
B7	25	SPX3	0.312076	0.067689
B7	26	SPX3	0.377175	0.132589
B7	27	SPX3	0.488381	0.243596
B7	28	SPX3	0.678428	0.433444
B7	29	SPX3	0.945471	0.700289
B7	30	SPX3	1.23488	0.989498
B7	31	SPX3	1.49789	1.25231
B7	32	SPX3	1.69202	1.44624
B7	33	SPX3	1.86833	1.62235
B7	34	SPX3	1.98716	1.74098
B7	35	SPX3	2.09478	1.8484
B7	36	SPX3	2.16839	1.92182
B7	37	SPX3	2.21967	1.97289
B7	38	SPX3	2.2737	2.02673
B7	39	SPX3	2.30109	2.05392
B7	40	SPX3	2.31429	2.06692
B8	1	SPX3	0.284383	-0.000750866
B8	2	SPX3	0.283	-0.00227359
B8	3	SPX3	0.285758	0.000345097
B8	4	SPX3	0.28688	0.00132711
B8	5	SPX3	0.283657	-0.00203541
B8	6	SPX3	0.286593	0.000760844
B8	7	SPX3	0.287687	0.00171457
B8	8	SPX3	0.286777	0.000665251
B8	9	SPX3	0.28703	0.00077882
B8	10	SPX3	0.285678	-0.000713093
B8	11	SPX3	0.286283	-0.000248364
B8	12	SPX3	0.286558	-0.00011301
B8	13	SPX3	0.284566	-0.0022443
B8	14	SPX3	0.286263	-0.000686662
B8	15	SPX3	0.28638	-0.000709976
B8	16	SPX3	0.285598	-0.00163186
B8	17	SPX3	0.286373	-0.000995887
B8	18	SPX3	0.28746	-4.85389e-05
B8	19	SPX3	0.287084	-0.000564604
B8	20	SPX3	0.289955	0.00216662
B8	21	SPX3	0.290161	0.0022334
B8	22	SPX3	0.294931	0.00686336
B8	23	SPX3	0.307692	0.0194853
B8	24	SPX3	0.326294	0.0379469
B8	25	SPX3	0.358584	0.0700976
B8	26	SPX3	0.425113	0.136486
B8	27	SPX3	0.536615	0.247849
B8	28	SPX3	0.722084	0.433178
B8	29	SPX3	0.99656	0.707514
B8	30	SPX3	1.31093	1.02174
B8	31	SPX3	1.60685	1.31752
B8	32	SPX3	1.82048	1.53102
B8	33	SPX3	1.99601	1.70641
B8	34	SPX3	2.11391	1.82416
B8	35	SPX3	2.21331	1.92343
B8	36	SPX3	2.29058	2.00056
B8	37	SPX3	2.35183	2.06166
B8	38	SPX3	2.3815	2.0912
B8	39	SPX3	2.41437	2.12393
B8	40	SPX3	2.42656	2.13598
B9	1	SPX3	0.306125	0.00399133
B9	2	SPX3	0.303432	0.00101314
B9	3	SPX3	0.303992	0.00128719
B9	4	SPX3	0.304213	0.00122239
B9	5	SPX3	0.30277	-0.000506246
B9	6	SPX3	0.304433	0.000871831
B9	7	SPX3	0.30444	0.000593256
B9	8	SPX3	0.305247	0.00111473
B9	9	SPX3	0.30446	4.2455e-05
B9	10	SPX3	0.304191	-0.000512387
B9	11	SPX3	0.304392	-0.000596651
B9	12	SPX3	0.302407	-0.00286742
B9	13	SPX3	0.303822	-0.0017381
B9	14	SPX3	0.30539	-0.000455603
B9	15	SPX3	0.30622	8.8247e-05
B9	16	SPX3	0.303739	-0.00267775
B9	17	SPX3	0.305806	-0.000896864
B9	18	SPX3	0.305837	-0.00115073
B9	19	SPX3	0.308036	0.000762207
B9	20	SPX3	0.308203	0.000643999
B9	21	SPX3	0.31262	0.00477545
B9	22	SPX3	0.314499	0.00636933
B9	23	SPX3	0.324886	0.0164701
B9	24	SPX3	0.339736	0.0310352
B9	25	SPX3	0.373636	0.064649
B9	26	SPX3	0.433398	0.124126
B9	27	SPX3	0.540435	0.230877
B9	28	SPX3	0.720286	0.410443
B9	29	SPX3	0.982021	0.671892
B9	30	SPX3	1.30037	0.989958
B9	31	SPX3	1.59518	1.28448
B9	32	SPX3	1.80501	1.49403
B9	33	SPX3	1.97478	1.66351
B9	34	SPX3	2.09498	1.78342
B9	35	SPX3	2.20146	1.88962
B9	36	SPX3	2.27713	1.96501
B9	37	SPX3	2.32799	2.01558
B9	38	SPX3	2.36988	2.05718
B9	39	SPX3	2.38674	2.07375
B9	40	SPX3	2.41253	2.09926
B10	1	SPX4	0.313831	-0.00126932
B10	2	SPX4	0.314274	-0.000658876
B10	3	SPX4	0.316071	0.00130486
B10	4	SPX4	0.316446	0.00184753
B10	5	SPX4	0.315111	0.000679047
B10	6	SPX4	0.315903	0.00163898
B10	7	SPX4	0.315499	0.00140244
B10	8	SPX4	0.313841	-8.86832e-05
B10	9	SPX4	0.310567	-0.00319548
B10	10	SPX4	0.311877	-0.00171869
B10	11	SPX4	0.309871	-0.00355683
B10	12	SPX4	0.310278	-0.00298248
B10	13	SPX4	0.312498	-0.00059534
B10	14	SPX4	0.313493	0.000566775
B10	15	SPX4	0.311252	-0.00150705
B10	16	SPX4	0.313044	0.000452667
B10	17	SPX4	0.313578	0.00115311
B10	18	SPX4	0.316856	0.00459913
B10	19	SPX4	0.324062	0.0119722
B10	20	SPX4	0.33853	0.0266069
B10	21	SPX4	0.365247	0.0534914
B10	22	SPX4	0.419166	0.107577
B10	23	SPX4	0.516622	0.205201
B10	24	SPX4	0.675025	0.363771
B10	25	SPX4	0.899178	0.588091
B10	26	SPX4	1.12265	0.811727
B10	27	SPX4	1.30057	0.98982
B10	28	SPX4	1.44956	1.13898
B10	29	SPX4	1.60614	1.29572
B10	30	SPX4	1.75976	1.44951
B10	31	SPX4	1.90263	1.59255
B10	32	SPX4	2.01497	1.70505
B10	33	SPX4	2.1239	1.81415
B10	34	SPX4	2.19708	1.88749
B10	35	SPX4	2.26093	1.95152
B10	36	SPX4	2.31897	2.00973
B10	37	SPX4	2.37106	2.06198
B10	38	SPX4	2.406	2.09708
B10	39	SPX4	2.44237	2.13362
B10	40	SPX4	2.47548	2.16691
B11	1	SPX4	0.299378	0.00424401
B11	2	SPX4	0.299592	0.00435274
B11	3	SPX4	0.295902	0.00055626
B11	4	SPX4	0.298232	0.00278146
B11	5	SPX4	0.295158	-0.000398767
B11	6	SPX4	0.295491	-0.000171486
B11	7	SPX4	0.296232	0.000464474
B11	8	SPX4	0.294562	-0.00131144
B11	9	SPX4	0.29634	0.00036075
B11	10	SPX4	0.296333	0.000248374
B11	11	SPX4	0.294102	-0.00208779
B11	12	SPX4	0.295508	-0.000787239
B11	13	SPX4	0.297397	0.000995992
B11	14	SPX4	0.295126	-0.00138097
B11	15	SPX4	0.294181	-0.00243129
B11	16	SPX4	0.29646	-0.000257676
B11	17	SPX4	0.29339	-0.00343305
B11	18	SPX4	0.297634	0.000705433
B11	19	SPX4	0.303182	0.00614696
B11	20	SPX4	0.312124	0.0149833
B11	21	SPX4	0.329009	0.0317632
B11	22	SPX4	0.359069	0.0617174
B11	23	SPX4	0.418045	0.120588
B11	24	SPX4	0.525543	0.227981
B11	25	SPX4	0.694174	0.396506
B11	26	SPX4	0.912196	0.614423
B11	27	SPX4	1.10942	0.811538
B11	28	SPX4	1.26096	0.962978
B11	29	SPX4	1.41849	1.1204
B11	30	SPX4	1.57715	1.27895
B11	31	SPX4	1.73184	1.43354
B11	32	SPX4	1.86441	1.566
B11	33	SPX4	1.98549	1.68698
B11	34	SPX4	2.08477	1.78616
B11	35	SPX4	2.16075	1.86203
B11	36	SPX4	2.22962	1.93079
B11	37	SPX4	2.28971	1.99078
B11	38	SPX4	2.33915	2.04011
B11	39	SPX4	2.37819	2.07905
B11	40	SPX4	2.41621	2.11696
B12	1	SPX4	0.324351	-0.00569533
B12	2	SPX4	0.326418	-0.00329788
B12	3	SPX4	0.329364	-2.1803e-05
B12	4	SPX4	0.330657	0.00160198
B12	5	SPX4	0.326637	-0.00208862
B12	6	SPX4	0.332981	0.00458576
B12	7	SPX4	0.32987	0.00180562
B12	8	SPX4	0.327761	2.68734e-05
B12	9	SPX4	0.32616	-0.00124399
B12	10	SPX4	0.325346	-0.00172806
B12	11	SPX4	0.32486	-0.00188324
B12	12	SPX4	0.324463	-0.00195047
B12	13	SPX4	0.323886	-0.002197
B12	14	SPX4	0.32583	7.65351e-05
B12	15	SPX4	0.32309	-0.00233313
B12	16	SPX4	0.324442	-0.000650847
B12	17	SPX4	0.32354	-0.00122248
B12	18	SPX4	0.331655	0.00722287
B12	19	SPX4	0.335492	0.0113903
B12	20	SPX4	0.346063	0.0222912
B12	21	SPX4	0.374563	0.0511216
B12	22	SPX4	0.423894	0.100783
B12	23	SPX4	0.518204	0.195423
B12	24	SPX4	0.662348	0.339897
B12	25	SPX4	0.83678	0.51466
B12	26	SPX4	0.990336	0.668546
B12	27	SPX4	1.1093	0.787836
B12	28	SPX4	1.2309	0.909768
B12	29	SPX4	1.39016	1.06936
B12	30	SPX4	1.52702	1.20655
B12	31	SPX4	1.66122	1.34108
B12	32	SPX4	1.77228	1.45247
B12	33	SPX4	1.88042	1.56094
B12	34	SPX4	1.96402	1.64487
B12	35	SPX4	2.03869	1.71988
B12	36	SPX4	2.11008	1.79159
B12	37	SPX4	2.15109	1.83293
B12	38	SPX4	2.19645	1.87862
B12	39	SPX4	2.23226	1.91476
B12	40	SPX4	2.26812	1.95095
C1	1	SPX1	0.29571	-0.000619809
C1	2	SPX1	0.295961	-0.000332076
C1	3	SPX1	0.294242	-0.0020158
C1	4	SPX1	0.299449	0.00322794
C1	5	SPX1	0.297282	0.00109665
C1	6	SPX1	0.295241	-0.0009081
C1	7	SPX1	0.297677	0.00156387
C1	8	SPX1	0.296851	0.000774343
C1	9	SPX1	0.295448	-0.000592728
C1	10	SPX1	0.296422	0.000416936
C1	11	SPX1	0.293511	-0.00245819
C1	12	SPX1	0.294774	-0.00115855
C1	13	SPX1	0.29567	-0.000226939
C1	14	SPX1	0.296896	0.0010356
C1	15	SPX1	0.295161	-0.00066362
C1	16	SPX1	0.294891	-0.000897815
C1	17	SPX1	0.295309	-0.000443547
C1	18	SPX1	0.293867	-0.00184909
C1	19	SPX1	0.296048	0.000366999
C1	20	SPX1	0.294486	-0.00115811
C1	21	SPX1	0.296064	0.000455465
C1	22	SPX1	0.296283	0.000711071
C1	23	SPX1	0.29826	0.00272361
C1	24	SPX1	0.304773	0.00927287
C1	25	SPX1	0.316963	0.0214986
C1	26	SPX1	0.33733	0.0419013
C1	27	SPX1	0.375024	0.0796323
C1	28	SPX1	0.441931	0.146575
C1	29	SPX1	0.556486	0.261166
C1	30	SPX1	0.71857	0.423286
C1	31	SPX1	0.888134	0.592887
C1	32	SPX1	0.992589	0.697377
C1	33	SPX1	1.09779	0.802611
C1	34	SPX1	1.20558	0.910445
C1	35	SPX1	1.33227	1.03717
C1	36	SPX1	1.45767	1.16261
C1	37	SPX1	1.58084	1.28581
C1	38	SPX1	1.67443	1.37943
C1	39	SPX1	1.77117	1.47621
C1	40	SPX1	1.84471	1.54979
C2	1	SPX1	0.236921	-0.00146221
C2	2	SPX1	0.239375	0.000858376
C2	3	SPX1	0.238318	-0.000333013
C2	4	SPX1	0.240439	0.0016539
C2	5	SPX1	0.240532	0.00161367
C2	6	SPX1	0.241557	0.00250393
C2	7	SPX1	0.23742	-0.00176686
C2	8	SPX1	0.241058	0.00173772
C2	9	SPX1	0.239443	-1.10666e-05
C2	10	SPX1	0.238844	-0.000744513
C2	11	SPX1	0.237103	-0.00261969
C2	12	SPX1	0.238473	-0.00138286
C2	13	SPX1	0.239356	-0.000634368
C2	14	SPX1	0.24059	0.000465863
C2	15	SPX1	0.239966	-0.00029153
C2	16	SPX1	0.23834	-0.00205219
C2	17	SPX1	0.240944	0.000418503
C2	18	SPX1	0.236591	-0.00406855
C2	19	SPX1	0.240421	-0.00037307
C2	20	SPX1	0.241287	0.000358939
C2	21	SPX1	0.239856	-0.00120587
C2	22	SPX1	0.243012	0.0018162
C2	23	SPX1	0.246244	0.00491486
C2	24	SPX1	0.248735	0.00727191
C2	25	SPX1	0.260497	0.0188999
C2	26	SPX1	0.277537	0.0358062
C2	27	SPX1	0.314258	0.0723932
C2	28	SPX1	0.372841	0.130842
C2	29	SPX1	0.481218	0.239085
C2	30	SPX1	0.634578	0.392311
C2	31	SPX1	0.798789	0.556388
C2	32	SPX1	0.901042	0.658507
C2	33	SPX1	1.00137	0.758701
C2	34	SPX1	1.10161	0.858808
C2	35	SPX1	1.22668	0.983747
C2	36	SPX1	1.34829	1.10522
C2	37	SPX1	1.46567	1.22246
C2	38	SPX1	1.56126	1.31792
C2	39	SPX1	1.66236	1.41889
C2	40	SPX1	1.73351	1.4899
C3	1	SPX1	0.277125	-7.21337e-05
C3	2	SPX1	0.281014	0.00339119
C3	3	SPX1	0.278085	3.70436e-05
C3	4	SPX1	0.278904	0.000430932
C3	5	SPX1	0.279907	0.0010084
C3	6	SPX1	0.281955	0.00263092
C3	7	SPX1	0.279267	-0.000481762
C3	8	SPX1	0.281783	0.00160919
C3	9	SPX1	0.280554	-4.51768e-05
C3	10	SPX1	0.283007	0.00198247
C3	11	SPX1	0.2819	0.000450388
C3	12	SPX1	0.281155	-0.000720227
C3	13	SPX1	0.279577	-0.00272328
C3	14	SPX1	0.282335	-0.000390662
C3	15	SPX1	0.279851	-0.00329997
C3	16	SPX1	0.281128	-0.00244862
C3	17	SPX1	0.285011	0.00100886
C3	18	SPX1	0.284138	-0.000288834
C3	19	SPX1	0.278327	-0.00652519
C3	20	SPX1	0.284822	-0.000455626
C3	21	SPX1	0.28343	-0.00227253
C3	22	SPX1	0.285732	-0.000395861
C3	23	SPX1	0.288675	0.00212105
C3	24	SPX1	0.295747	0.00876848
C3	25	SPX1	0.305403	0.0179992
C3	26	SPX1	0.329677	0.0418479
C3	27	SPX1	0.37478	0.0865255
C3	28	SPX1	0.449678	0.160998
C3	29	SPX1	0.575949	0.286843
C3	30	SPX1	0.75734	0.467809
C3	31	SPX1	0.940929	0.650973
C3	32	SPX1	1.057	0.766616
C3	33	SPX1	1.17296	0.88215
C3	34	SPX1	1.29409	1.00286
C3	35	SPX1	1.43591	1.14425
C3	36	SPX1	1.57117	1.27909
C3	37	SPX1	1.70457	1.41207
C3	38	SPX1	1.81539	1.52246
C3	39	SPX1	1.91038	1.61703
C3	40	SPX1	1.9874	1.69361
C4	1	SPX2	0.259866	-0.00337064
C4	2	SPX2	0.262122	-0.00100198
C4	3	SPX2	0.261181	-0.00183095
C4	4	SPX2	0.262278	-0.000621482
C4	5	SPX2	0.264632	0.00184449
C4	6	SPX2	0.260954	-0.00172073
C4	7	SPX2	0.263238	0.000675229
C4	8	SPX2	0.262889	0.000438156
C4	9	SPX2	0.263037	0.00069896
C4	10	SPX2	0.263025	0.000798951
C4	11	SPX2	0.264174	0.00206025
C4	12	SPX2	0.261235	-0.000766974
C4	13	SPX2	0.262137	0.000247263
C4	14	SPX2	0.263152	0.00137508
C4	15	SPX2	0.262378	0.00071338
C4	16	SPX2	0.259037	-0.00251567
C4	17	SPX2	0.26077	-0.000670304
C4	18	SPX2	0.259767	-0.00156085
C4	19	SPX2	0.260285	-0.000931036
C4	20	SPX2	0.26082	-0.00028307
C4	21	SPX2	0.26304	0.00204932
C4	22	SPX2	0.269745	0.00886569
C4	23	SPX2	0.283181	0.0224144
C4	24	SPX2	0.305094	0.0444401
C4	25	SPX2	0.346808	0.0862662
C4	26	SPX2	0.41827	0.15784
C4	27	SPX2	0.542099	0.281782
C4	28	SPX2	0.72569	0.465485
C4	29	SPX2	0.983097	0.723004
C4	30	SPX2	1.24442	0.984442
C4	31	SPX2	1.4898	1.22993
C4	32	SPX2	1.69325	1.4335
C4	33	SPX2	1.88052	1.62087
C4	34	SPX2	2.02632	1.76679
C4	35	SPX2	2.15398	1.89456
C4	36	SPX2	2.25298	1.99368
C4	37	SPX2	2.32699	2.06779
C4	38	SPX2	2.38116	2.12208
C4	39	SPX2	2.42946	2.17049
C4	40	SPX2	2.4648	2.20594
C5	1	SPX2	0.252413	-0.00808947
C5	2	SPX2	0.257582	-0.00312787
C5	3	SPX2	0.258865	-0.002053
C5	4	SPX2	0.259837	-0.00128867
C5	5	SPX2	0.262678	0.00134442
C5	6	SPX2	0.262716	0.00117438
C5	7	SPX2	0.263685	0.00193549
C5	8	SPX2	0.262736	0.000777989
C5	9	SPX2	0.265374	0.0032083
C5	10	SPX2	0.260996	-0.00137737
C5	11	SPX2	0.262608	2.57745e-05
C5	12	SPX2	0.262814	2.38858e-05
C5	13	SPX2	0.261579	-0.00141912
C5	14	SPX2	0.259921	-0.00328446
C5	15	SPX2	0.263628	0.000214647
C5	16	SPX2	0.264813	0.00119153
C5	17	SPX2	0.260368	-0.00346122
C5	18	SPX2	0.264461	0.000422961
C5	19	SPX2	0.262447	-0.00179857
C5	20	SPX2	0.266428	0.00197481
C5	21	SPX2	0.26705	0.00238824
C5	22	SPX2	0.272702	0.00783285
C5	23	SPX2	0.284688	0.0196103
C5	24	SPX2	0.302237	0.0369512
C5	25	SPX2	0.338527	0.0730332
C5	26	SPX2	0.398283	0.132581
C5	27	SPX2	0.510694	0.244784
C5	28	SPX2	0.687869	0.421752
C5	29	SPX2	0.955788	0.689462
C5	30	SPX2	1.27812	1.01158
C5	31	SPX2	1.59873	1.33199
C5	32	SPX2	1.85784	1.59089
C5	33	SPX2	2.08226	1.81511
C5	34	SPX2	2.23565	1.96829
C5	35	SPX2	2.36608	2.09851
C5	36	SPX2	2.45526	2.18748
C5	37	SPX2	2.53937	2.27138
C5	38	SPX2	2.58619	2.31799
C5	39	SPX2	2.63468	2.36627
C5	40	SPX2	2.66653	2.39792
C6	1	SPX2	0.237055	-0.00155877
C6	2	SPX2	0.238976	0.000155581
C6	3	SPX2	0.238161	-0.000865135
C6	4	SPX2	0.241196	0.00196368
C6	5	SPX2	0.240552	0.00111321
C6	6	SPX2	0.241243	0.0015978
C6	7	SPX2	0.240416	0.000565085
C6	8	SPX2	0.241159	0.0011012
C6	9	SPX2	0.240679	0.000415935
C6	10	SPX2	0.240681	0.000211743
C6	11	SPX2	0.239218	-0.00145816
C6	12	SPX2	0.240437	-0.000445298
C6	13	SPX2	0.240364	-0.000724607
C6	14	SPX2	0.241191	-0.000102948
C6	15	SPX2	0.239364	-0.00213641
C6	16	SPX2	0.238733	-0.0029736
C6	17	SPX2	0.2376	-0.00431261
C6	18	SPX2	0.240867	-0.00125233
C6	19	SPX2	0.239145	-0.00318046
C6	20	SPX2	0.241383	-0.00114842
C6	21	SPX2	0.246543	0.00380555
C6	22	SPX2	0.250769	0.00782577
C6	23	SPX2	0.259837	0.0166875
C6	24	SPX2	0.27912	0.0357639
C6	25	SPX2	0.313749	0.0701867
C6	26	SPX2	0.38187	0.138102
C6	27	SPX2	0.4925	0.248526
C6	28	SPX2	0.67076	0.42658
C6	29	SPX2	0.920455	0.676068
C6	30	SPX2	1.19135	0.946757
C6	31	SPX2	1.46196	1.21716
C6	32	SPX2	1.67454	1.42953
C6	33	SPX2	1.89581	1.6506
C6	34	SPX2	2.05575	1.81033
C6	35	SPX2	2.19572	1.95009
C6	36	SPX2	2.30943	2.0636
C6	37	SPX2	2.3849	2.13886
C6	38	SPX2	2.44307	2.19683
C6	39	SPX2	2.49955	2.2531
C6	40	SPX2	2.53844	2.29179
C7	1	SPX3	0.237022	-0.00193075
C7	2	SPX3	0.235601	-0.003559
C7	3	SPX3	0.239265	-0.000102669
C7	4	SPX3	0.239968	0.000393163
C7	5	SPX3	0.240197	0.00041399
C7	6	SPX3	0.240532	0.000541689
C7	7	SPX3	0.240255	5.76356e-05
C7	8	SPX3	0.240223	-0.000181905
C7	9	SPX3	0.239057	-0.00155511
C7	10	SPX3	0.243593	0.00277387
C7	11	SPX3	0.240772	-0.000254352
C7	12	SPX3	0.240653	-0.000580751
C7	13	SPX3	0.241291	-0.000150201
C7	14	SPX3	0.240503	-0.00114554
C7	15	SPX3	0.240605	-0.00125111
C7	16	SPX3	0.241476	-0.000587622
C7	17	SPX3	0.242299	2.78218e-05
C7	18	SPX3	0.241947	-0.000531542
C7	19	SPX3	0.242484	-0.00020153
C7	20	SPX3	0.242337	-0.000556406
C7	21	SPX3	0.245991	0.00289057
C7	22	SPX3	0.250885	0.00757758
C7	23	SPX3	0.262813	0.0192976
C7	24	SPX3	0.281494	0.0377712
C7	25	SPX3	0.316632	0.0727019
C7	26	SPX3	0.386329	0.142191
C7	27	SPX3	0.505458	0.261114
C7	28	SPX3	0.701395	0.456843
C7	29	SPX3	0.978315	0.733556
C7	30	SPX3	1.27553	1.03056
C7	31	SPX3	1.54155	1.29638
C7	32	SPX3	1.73922	1.49384
C7	33	SPX3	1.9177	1.67211
C7	34	SPX3	2.05192	1.80612
C7	35	SPX3	2.15942	1.91341
C7	36	SPX3	2.24512	1.99891
C7	37	SPX3	2.30926	2.06285
C7	38	SPX3	2.34741	2.10079
C7	39	SPX3	2.38477	2.13793
C7	40	SPX3	2.41502	2.16798
C8	1	SPX3	0.273582	-0.0010062
C8	2	SPX3	0.276098	0.00106818
C8	3	SPX3	0.276563	0.00109242
C8	4	SPX3	0.275859	-5.31002e-05
C8	5	SPX3	0.276467	0.000113274
C8	6	SPX3	0.277131	0.000335677
C8	7	SPX3	0.277684	0.000447305
C8	8	SPX3	0.276804	-0.000874112
C8	9	SPX3	0.27987	0.00175107
C8	10	SPX3	0.277372	-0.00118825
C8	11	SPX3	0.278474	-0.000527607
C8	12	SPX3	0.279027	-0.000416158
C8	13	SPX3	0.281732	0.00184776
C8	14	SPX3	0.278781	-0.00154542
C8	15	SPX3	0.279267	-0.00150055
C8	16	SPX3	0.280194	-0.00101484
C8	17	SPX3	0.280542	-0.00110817
C8	18	SPX3	0.280214	-0.00187785
C8	19	SPX3	0.281937	-0.00059586
C8	20	SPX3	0.284918	0.00194346
C8	21	SPX3	0.286587	0.00317095
C8	22	SPX3	0.288079	0.00422189
C8	23	SPX3	0.29959	0.0152916
C8	24	SPX3	0.319109	0.0343691
C8	25	SPX3	0.35137	0.0661886
C8	26	SPX3	0.409296	0.123673
C8	27	SPX3	0.522256	0.236192
C8	28	SPX3	0.710864	0.424358
C8	29	SPX3	0.976892	0.689945
C8	30	SPX3	1.30389	1.0165
C8	31	SPX3	1.62224	1.33441
C8	32	SPX3	1.84375	1.55548
C8	33	SPX3	2.02178	1.73306
C8	34	SPX3	2.15696	1.8678
C8	35	SPX3	2.26559	1.976
C8	36	SPX3	2.34772	2.05769
C8	37	SPX3	2.41428	2.12381
C8	38	SPX3	2.4543	2.16338
C8	39	SPX3	2.47491	2.18355
C8	40	SPX3	2.50019	2.20838
C9	1	SPX3	0.309654	0.00826598
C9	2	SPX3	0.30543	0.00406414
C9	3	SPX3	0.302215	0.000871921
C9	4	SPX3	0.302223	0.00090297
C9	5	SPX3	0.302677	0.00137965
C9	6	SPX3	0.301307	3.15991e-05
C9	7	SPX3	0.305181	0.00392887
C9	8	SPX3	0.300101	-0.00112865
C9	9	SPX3	0.30011	-0.00109697
C9	10	SPX3	0.300197	-0.000987959
C9	11	SPX3	0.301686	0.000524205
C9	12	SPX3	0.300001	-0.00113874
C9	13	SPX3	0.300252	-0.000864981
C9	14	SPX3	0.298772	-0.0023228
C9	15	SPX3	0.299077	-0.00199501
C9	16	SPX3	0.299141	-0.00190849
C9	17	SPX3	0.300285	-0.000742007
C9	18	SPX3	0.299112	-0.00189158
C9	19	SPX3	0.299684	-0.00129726
C9	20	SPX3	0.299948	-0.0010112
C9	21	SPX3	0.301736	0.000799318
C9	22	SPX3	0.308861	0.0079471
C9	23	SPX3	0.318283	0.0173915
C9	24	SPX3	0.339336	0.0384674
C9	25	SPX3	0.37751	0.0766643
C9	26	SPX3	0.44892	0.148096
C9	27	SPX3	0.573134	0.272334
C9	28	SPX3	0.773173	0.472395
C9	29	SPX3	1.04081	0.740058
C9	30	SPX3	1.31221	1.01148
C9	31	SPX3	1.53619	1.23548
C9	32	SPX3	1.71387	1.41318
C9	33	SPX3	1.87359	1.57292
C9	34	SPX3	1.99364	1.693
C9	35	SPX3	2.08946	1.78884
C9	36	SPX3	2.16733	1.86673
C9	37	SPX3	2.2181	1.91753
C9	38	SPX3	2.26212	1.96157
C9	39	SPX3	2.30249	2.00196
C9	40	SPX3	2.31248	2.01197
C10	1	SPX4	0.25208	-0.00324196
C10	2	SPX4	0.256985	0.00145661
C10	3	SPX4	0.257962	0.00222858
C10	4	SPX4	0.25688	0.000941179
C10	5	SPX4	0.25691	0.000765791
C10	6	SPX4	0.257383	0.00103291
C10	7	SPX4	0.255902	-0.000653487
C10	8	SPX4	0.256266	-0.000495029
C10	9	SPX4	0.257493	0.000526653
C10	10	SPX4	0.25596	-0.00121157
C10	11	SPX4	0.255834	-0.00154318
C10	12	SPX4	0.25639	-0.00119202
C10	13	SPX4	0.255543	-0.00224515
C10	14	SPX4	0.257521	-0.000472237
C10	15	SPX4	0.255538	-0.00266047
C10	16	SPX4	0.256287	-0.00211703
C10	17	SPX4	0.257761	-0.000848613
C10	18	SPX4	0.259028	0.000212766
C10	19	SPX4	0.266752	0.00773091
C10	20	SPX4	0.275415	0.0161888
C10	21	SPX4	0.294574	0.0351422
C10	22	SPX4	0.327329	0.0676919
C10	23	SPX4	0.392449	0.132606
C10	24	SPX4	0.508007	0.247959
C10	25	SPX4	0.683101	0.422847
C10	26	SPX4	0.883045	0.622586
C10	27	SPX4	1.05743	0.796766
C10	28	SPX4	1.19089	0.930024
C10	29	SPX4	1.33485	1.07377
C10	30	SPX4	1.49171	1.23043
C10	31	SPX4	1.64077	1.37928
C10	32	SPX4	1.77455	1.51286
C10	33	SPX4	1.89224	1.63034
C10	34	SPX4	1.98083	1.71873
C10	35	SPX4	2.05947	1.79716
C10	36	SPX4	2.12242	1.85991
C10	37	SPX4	2.18386	1.92114
C10	38	SPX4	2.22722	1.96429
C10	39	SPX4	2.27077	2.00764
C10	40	SPX4	2.30578	2.04245
C11	1	SPX4	0.227271	-0.000542202
C11	2	SPX4	0.230463	0.00259601
C11	3	SPX4	0.229178	0.00125824
C11	4	SPX4	0.229972	0.00199976
C11	5	SPX4	0.227863	-0.000161672
C11	6	SPX4	0.228986	0.000908541
C11	7	SPX4	0.227473	-0.000657337
C11	8	SPX4	0.229123	0.000939512
C11	9	SPX4	0.23036	0.00212402
C11	10	SPX4	0.225895	-0.00239393
C11	11	SPX4	0.226598	-0.00174389
C11	12	SPX4	0.226315	-0.00207945
C11	13	SPX4	0.226013	-0.00243507
C11	14	SPX4	0.226118	-0.00238225
C11	15	SPX4	0.227735	-0.000818271
C11	16	SPX4	0.227583	-0.00102323
C11	17	SPX4	0.227299	-0.00136035
C11	18	SPX4	0.230987	0.00227512
C11	19	SPX4	0.234315	0.00555025
C11	20	SPX4	0.243294	0.0144764
C11	21	SPX4	0.261373	0.0325023
C11	22	SPX4	0.290434	0.0615106
C11	23	SPX4	0.353945	0.124969
C11	24	SPX4	0.456606	0.227577
C11	25	SPX4	0.615746	0.386664
C11	26	SPX4	0.792637	0.563503
C11	27	SPX4	0.927145	0.697957
C11	28	SPX4	1.0185	0.789255
C11	29	SPX4	1.11118	0.881885
C11	30	SPX4	1.20331	0.973959
C11	31	SPX4	1.28311	1.05371
C11	32	SPX4	1.35416	1.1247
C11	33	SPX4	1.41271	1.18321
C11	34	SPX4	1.45704	1.22749
C11	35	SPX4	1.49403	1.26442
C11	36	SPX4	1.51664	1.28697
C11	37	SPX4	1.55035	1.32064
C11	38	SPX4	1.55939	1.32962
C11	39	SPX4	1.58294	1.35312
C11	40	SPX4	1.58794	1.35807
C12	1	SPX4	0.301357	-0.00190501
C12	2	SPX4	0.299367	-0.00411978
C12	3	SPX4	0.302632	-0.00107993
C12	4	SPX4	0.306332	0.00239468
C12	5	SPX4	0.306354	0.0021921
C12	6	SPX4	0.305622	0.00123421
C12	7	SPX4	0.305527	0.000913826
C12	8	SPX4	0.304642	-0.000196204
C12	9	SPX4	0.301419	-0.00364426
C12	10	SPX4	0.305706	0.000417786
C12	11	SPX4	0.304892	-0.000621256
C12	12	SPX4	0.306186	0.000446995
C12	13	SPX4	0.302286	-0.0036773
C12	14	SPX4	0.303435	-0.00275353
C12	15	SPX4	0.307333	0.000918934
C12	16	SPX4	0.304857	-0.0017826
C12	17	SPX4	0.305181	-0.0016834
C12	18	SPX4	0.3083	0.00121054
C12	19	SPX4	0.313024	0.0057094
C12	20	SPX4	0.322792	0.0152522
C12	21	SPX4	0.341707	0.0339418
C12	22	SPX4	0.376789	0.0687988
C12	23	SPX4	0.444213	0.135997
C12	24	SPX4	0.563625	0.255184
C12	25	SPX4	0.752563	0.443897
C12	26	SPX4	0.966624	0.657734
C12	27	SPX4	1.15053	0.841409
C12	28	SPX4	1.29813	0.988784
C12	29	SPX4	1.45257	1.143
C12	30	SPX4	1.6131	1.30331
C12	31	SPX4	1.76228	1.45227
C12	32	SPX4	1.90245	1.59221
C12	33	SPX4	2.01841	1.70794
C12	34	SPX4	2.10559	1.7949
C12	35	SPX4	2.18222	1.8713
C12	36	SPX4	2.25271	1.94157
C12	37	SPX4	2.3175	2.00613
C12	38	SPX4	2.35725	2.04566
C12	39	SPX4	2.39291	2.08109
C12	40	SPX4	2.43651	2.12447
D1	1	SPX1	0.317207	1.96731e-05
D1	2	SPX1	0.318196	0.000868164
D1	3	SPX1	0.32028	0.00281094
D1	4	SPX1	0.317974	0.000363141
D1	5	SPX1	0.318688	0.000936079
D1	6	SPX1	0.318674	0.000780827
D1	7	SPX1	0.316562	-0.00147239
D1	8	SPX1	0.31815	-2.54676e-05
D1	9	SPX1	0.318728	0.000410916
D1	10	SPX1	0.317427	-0.00103156
D1	11	SPX1	0.317902	-0.000697187
D1	12	SPX1	0.317933	-0.000807467
D1	13	SPX1	0.318269	-0.000612988
D1	14	SPX1	0.315613	-0.00341039
D1	15	SPX1	0.317151	-0.00201396
D1	16	SPX1	0.31826	-0.00104569
D1	17	SPX1	0.317563	-0.00188377
D1	18	SPX1	0.320847	0.00125803
D1	19	SPX1	0.321279	0.00154874
D1	20	SPX1	0.324763	0.0048922
D1	21	SPX1	0.333936	0.0139236
D1	22	SPX1	0.348001	0.0278471
D1	23	SPX1	0.379168	0.0588733
D1	24	SPX1	0.434075	0.113639
D1	25	SPX1	0.527464	0.206886
D1	26	SPX1	0.675337	0.354618
D1	27	SPX1	0.862993	0.542133
D1	28	SPX1	1.02818	0.707174
D1	29	SPX1	1.13868	0.81754
D1	30	SPX1	1.23919	0.917906
D1	31	SPX1	1.37696	1.05553
D1	32	SPX1	1.50917	1.1876
D1	33	SPX1	1.64661	1.3249
D1	34	SPX1	1.75108	1.42923
D1	35	SPX1	1.86803	1.54604
D1	36	SPX1	1.96082	1.63868
D1	37	SPX1	2.03999	1.71772
D1	38	SPX1	2.10185	1.77943
D1	39	SPX1	2.16155	1.839
D1	40	SPX1	2.22159	1.8989
D2	1	SPX1	0.248355	0.000792064
D2	2	SPX1	0.247379	-0.000183581
D2	3	SPX1	0.247195	-0.000368331
D2	4	SPX1	0.247552	-1.13352e-05
D2	5	SPX1	0.246846	-0.000717686
D2	6	SPX1	0.247783	0.000218831
D2	7	SPX1	0.246703	-0.00086209
D2	8	SPX1	0.248723	0.00115773
D2	9	SPX1	0.249605	0.00203942
D2	10	SPX1	0.248447	0.000880523
D2	11	SPX1	0.245387	-0.00217948
D2	12	SPX1	0.247199	-0.000367356
D2	13	SPX1	0.247834	0.000267025
D2	14	SPX1	0.247785	0.000217994
D2	15	SPX1	0.24906	0.00149183
D2	16	SPX1	0.246503	-0.00106557
D2	17	SPX1	0.246778	-0.000790847
D2	18	SPX1	0.246252	-0.0013164
D2	19	SPX1	0.248975	0.00140575
D2	20	SPX1	0.251151	0.00358108
D2	21	SPX1	0.262252	0.0146817
D2	22	SPX1	0.27684	0.0292701
D2	23	SPX1	0.302856	0.055285
D2	24	SPX1	0.357061	0.10949
D2	25	SPX1	0.448463	0.200891
D2	26	SPX1	0.589682	0.34211
D2	27	SPX1	0.761766	0.514194
D2	28	SPX1	0.879802	0.632229
D2	29	SPX1	0.971373	0.7238
D2	30	SPX1	1.07115	0.823573
D2	31	SPX1	1.19856	0.950982
D2	32	SPX1	1.31389	1.06632
D2	33	SPX1	1.44696	1.19938
D2	34	SPX1	1.54484	1.29727
D2	35	SPX1	1.65525	1.40767
D2	36	SPX1	1.73855	1.49098
D2	37	SPX1	1.82135	1.57378
D2	38	SPX1	1.88436	1.63678
D2	39	SPX1	1.95325	1.70567
D2	40	SPX1	1.9956	1.74802
D3	1	SPX1	0.275483	-0.00317178
D3	2	SPX1	0.277635	-0.000900469
D3	3	SPX1	0.277649	-0.000768307
D3	4	SPX1	0.279454	0.00115578
D3	5	SPX1	0.27947	0.00129101
D3	6	SPX1	0.279891	0.00183033
D3	7	SPX1	0.278195	0.000253303
D3	8	SPX1	0.279131	0.00130812
D3	9	SPX1	0.275155	-0.00254817
D3	10	SPX1	0.277225	-0.000360151
D3	11	SPX1	0.277923	0.000457643
D3	12	SPX1	0.277605	0.000257808
D3	13	SPX1	0.275897	-0.00133091
D3	14	SPX1	0.274234	-0.00287509
D3	15	SPX1	0.276784	-0.00020589
D3	16	SPX1	0.273498	-0.00337362
D3	17	SPX1	0.275963	-0.000789739
D3	18	SPX1	0.27632	-0.000313092
D3	19	SPX1	0.27664	0.000124902
D3	20	SPX1	0.282282	0.00588607
D3	21	SPX1	0.288669	0.0123923
D3	22	SPX1	0.304125	0.0279667
D3	23	SPX1	0.335004	0.0589648
D3	24	SPX1	0.392392	0.116472
D3	25	SPX1	0.488368	0.212567
D3	26	SPX1	0.640775	0.365093
D3	27	SPX1	0.821935	0.546372
D3	28	SPX1	0.97223	0.696786
D3	29	SPX1	1.07056	0.795232
D3	30	SPX1	1.16823	0.893025
D3	31	SPX1	1.28044	1.00535
D3	32	SPX1	1.39559	1.12062
D3	33	SPX1	1.51879	1.24394
D3	34	SPX1	1.60721	1.33248
D3	35	SPX1	1.70519	1.43058
D3	36	SPX1	1.77985	1.50536
D3	37	SPX1	1.84349	1.56912
D3	38	SPX1	1.90392	1.62966
D3	39	SPX1	1.94801	1.67387
D3	40	SPX1	1.99077	1.71675
D4	1	SPX2	0.254158	0.000508739
D4	2	SPX2	0.252792	-0.000690782
D4	3	SPX2	0.252085	-0.00123024
D4	4	SPX2	0.254496	0.0013481
D4	5	SPX2	0.254276	0.00129567
D4	6	SPX2	0.255607	0.00279374
D4	7	SPX2	0.254521	0.00187543
D4	8	SPX2	0.252738	0.000259213
D4	9	SPX2	0.251033	-0.00127794
D4	10	SPX2	0.252232	8.75375e-05
D4	11	SPX2	0.249799	-0.00217755
D4	12	SPX2	0.250776	-0.00103379
D4	13	SPX2	0.250592	-0.00104962
D4	14	SPX2	0.250909	-0.000565549
D4	15	SPX2	0.249262	-0.00204517
D4	16	SPX2	0.247799	-0.00334146
D4	17	SPX2	0.250147	-0.000825686
D4	18	SPX2	0.248994	-0.00181169
D4	19	SPX2	0.250777	0.000138793
D4	20	SPX2	0.252681	0.00221037
D4	21	SPX2	0.255654	0.00534983
D4	22	SPX2	0.264317	0.0141809
D4	23	SPX2	0.27909	0.0291212
D4	24	SPX2	0.305098	0.0552959
D4	25	SPX2	0.352184	0.102549
D4	26	SPX2	0.438233	0.188766
D4	27	SPX2	0.581982	0.332682
D4	28	SPX2	0.783391	0.534259
D4	29	SPX2	1.05116	0.802194
D4	30	SPX2	1.29823	1.04943
D4	31	SPX2	1.522	1.27337
D4	32	SPX2	1.70163	1.45316
D4	33	SPX2	1.86767	1.61937
D4	34	SPX2	2.00211	1.75398
D4	35	SPX2	2.118	1.87004
D4	36	SPX2	2.19569	1.94789
D4	37	SPX2	2.27348	2.02585
D4	38	SPX2	2.315	2.06754
D4	39	SPX2	2.35808	2.11079
D4	40	SPX2	2.38974	2.14262
D5	1	SPX2	0.267018	-0.00726191
D5	2	SPX2	0.269036	-0.00622541
D5	3	SPX2	0.272547	-0.00369501
D5	4	SPX2	0.277284	6.08315e-05
D5	5	SPX2	0.27802	-0.000184975
D5	6	SPX2	0.281246	0.00205953
D5	7	SPX2	0.28309	0.00292246
D5	8	SPX2	0.281587	0.00043814
D5	9	SPX2	0.283291	0.00116127
D5	10	SPX2	0.28329	0.000178835
D5	11	SPX2	0.283909	-0.000183469
D5	12	SPX2	0.286757	0.00168326
D5	13	SPX2	0.285725	-0.000330121
D5	14	SPX2	0.28664	-0.000396845
D5	15	SPX2	0.285988	-0.00203016
D5	16	SPX2	0.288093	-0.000905953
D5	17	SPX2	0.286886	-0.00309431
D5	18	SPX2	0.289598	-0.00136371
D5	19	SPX2	0.291082	-0.000861301
D5	20	SPX2	0.29496	0.00203596
D5	21	SPX2	0.296411	0.00250556
D5	22	SPX2	0.302033	0.00714558
D5	23	SPX2	0.312684	0.0168158
D5	24	SPX2	0.33587	0.0390201
D5	25	SPX2	0.375555	0.0777237
D5	26	SPX2	0.447239	0.148427
D5	27	SPX2	0.570509	0.270716
D5	28	SPX2	0.766416	0.465641
D5	29	SPX2	1.05721	0.755458
D5	30	SPX2	1.38544	1.0827
D5	31	SPX2	1.70382	1.4001
D5	32	SPX2	1.95163	1.64693
D5	33	SPX2	2.16074	1.85506
D5	34	SPX2	2.30909	2.00243
D5	35	SPX2	2.43542	2.12778
D5	36	SPX2	2.5198	2.21117
D5	37	SPX2	2.59264	2.28303
D5	38	SPX2	2.64755	2.33697
D5	39	SPX2	2.68761	2.37604
D5	40	SPX2	2.71053	2.39798
D6	1	SPX2	0.308913	-0.00939307
D6	2	SPX2	0.313636	-0.00471452
D6	3	SPX2	0.314875	-0.00352047
D6	4	SPX2	0.317548	-0.00089107
D6	5	SPX2	0.31766	-0.000823959
D6	6	SPX2	0.319627	0.00109888
D6	7	SPX2	0.321369	0.00279708
D6	8	SPX2	0.31998	0.00136328
D6	9	SPX2	0.319259	0.000598315
D6	10	SPX2	0.321534	0.00282907
D6	11	SPX2	0.317685	-0.00106496
D6	12	SPX2	0.319388	0.000594341
D6	13	SPX2	0.319096	0.000257781
D6	14	SPX2	0.318557	-0.000325365
D6	15	SPX2	0.31882	-0.000106708
D6	16	SPX2	0.319155	0.000183712
D6	17	SPX2	0.317815	-0.00120067
D6	18	SPX2	0.317339	-0.00172072
D6	19	SPX2	0.316445	-0.0026589
D6	20	SPX2	0.319704	0.000555454
D6	21	SPX2	0.321228	0.0020349
D6	22	SPX2	0.330663	0.0114255
D6	23	SPX2	0.345533	0.0262511
D6	24	SPX2	0.371086	0.0517603
D6	25	SPX2	0.418825	0.099455
D6	26	SPX2	0.502935	0.18352
D6	27	SPX2	0.644705	0.325246
D6	28	SPX2	0.862786	0.543283
D6	29	SPX2	1.15263	0.833086
D6	30	SPX2	1.4485	1.12891
D6	31	SPX2	1.72411	1.40447
D6	32	SPX2	1.92519	1.60551
D6	33	SPX2	2.11468	1.79495
D6	34	SPX2	2.24695	1.92718
D6	35	SPX2	2.36361	2.0438
D6	36	SPX2	2.44095	2.12109
D6	37	SPX2	2.50527	2.18537
D6	38	SPX2	2.55617	2.23623
D6	39	SPX2	2.59228	2.27229
D6	40	SPX2	2.62009	2.30005
D7	1	SPX3	0.227311	-0.00610582
D7	2	SPX3	0.228407	-0.00494658
D7	3	SPX3	0.230805	-0.00248587
D7	4	SPX3	0.23208	-0.00114878
D7	5	SPX3	0.235288	0.00212251
D7	6	SPX3	0.235056	0.00195286
D7	7	SPX3	0.23526	0.00221951
D7	8	SPX3	0.233587	0.000609582
D7	9	SPX3	0.233236	0.000320909
D7	10	SPX3	0.233607	0.000755299
D7	11	SPX3	0.23285	6.02408e-05
D7	12	SPX3	0.233294	0.00056717
D7	13	SPX3	0.231151	-0.00151258
D7	14	SPX3	0.231565	-0.00103584
D7	15	SPX3	0.233325	0.000786997
D7	16	SPX3	0.229809	-0.00266637
D7	17	SPX3	0.228911	-0.00350217
D7	18	SPX3	0.231152	-0.00119849
D7	19	SPX3	0.230339	-0.00194826
D7	20	SPX3	0.232251	2.63397e-05
D7	21	SPX3	0.231833	-0.000329404
D7	22	SPX3	0.238506	0.00640634
D7	23	SPX3	0.245076	0.0130392
D7	24	SPX3	0.263981	0.0320071
D7	25	SPX3	0.297412	0.0655007
D7	26	SPX3	0.356383	0.124535
D7	27	SPX3	0.468578	0.236792
D7	28	SPX3	0.647756	0.416033
D7	29	SPX3	0.919288	0.687627
D7	30	SPX3	1.22602	0.994421
D7	31	SPX3	1.50779	1.27625
D7	32	SPX3	1.72818	1.49671
D7	33	SPX3	1.91588	1.68447
D7	34	SPX3	2.06306	1.83171
D7	35	SPX3	2.17342	1.94213
D7	36	SPX3	2.26822	2.037
D7	37	SPX3	2.33683	2.10567
D7	38	SPX3	2.37911	2.14802
D7	39	SPX3	2.42317	2.19214
D7	40	SPX3	2.43533	2.20436
D8	1	SPX3	0.226391	-0.00143718
D8	2	SPX3	0.229839	0.00144638
D8	3	SPX3	0.230509	0.00155105
D8	4	SPX3	0.232118	0.00259526
D8	5	SPX3	0.228929	-0.00115804
D8	6	SPX3	0.231454	0.000801672
D8	7	SPX3	0.232543	0.00132645
D8	8	SPX3	0.231267	-0.00051503
D8	9	SPX3	0.23205	-0.000296768
D8	10	SPX3	0.230911	-0.00199979
D8	11	SPX3	0.232731	-0.000745432
D8	12	SPX3	0.233125	-0.00091609
D8	13	SPX3	0.233706	-0.000899366
D8	14	SPX3	0.23296	-0.00221034
D8	15	SPX3	0.236259	0.00052357
D8	16	SPX3	0.235375	-0.000925101
D8	17	SPX3	0.236787	-7.82033e-05
D8	18	SPX3	0.236873	-0.000556526
D8	19	SPX3	0.237142	-0.000852056
D8	20	SPX3	0.23731	-0.00124885
D8	21	SPX3	0.237663	-0.00146125
D8	22	SPX3	0.246754	0.00706484
D8	23	SPX3	0.253023	0.0127691
D8	24	SPX3	0.266814	0.0259954
D8	25	SPX3	0.296182	0.0547992
D8	26	SPX3	0.345353	0.103405
D8	27	SPX3	0.444046	0.201534
D8	28	SPX3	0.605341	0.362263
D8	29	SPX3	0.858537	0.614894
D8	30	SPX3	1.18362	0.939408
D8	31	SPX3	1.52063	1.27585
D8	32	SPX3	1.77859	1.53325
D8	33	SPX3	1.98875	1.74285
D8	34	SPX3	2.13986	1.89339
D8	35	SPX3	2.26236	2.01533
D8	36	SPX3	2.34713	2.09953
D8	37	SPX3	2.42352	2.17536
D8	38	SPX3	2.46531	2.21658
D8	39	SPX3	2.49827	2.24898
D8	40	SPX3	2.52626	2.2764
D9	1	SPX3	0.350252	0.00667825
D9	2	SPX3	0.346365	0.00393094
D9	3	SPX3	0.345732	0.00443727
D9	4	SPX3	0.342676	0.00252069
D9	5	SPX3	0.339821	0.00080493
D9	6	SPX3	0.338206	0.000329151
D9	7	SPX3	0.335609	-0.00112876
D9	8	SPX3	0.332695	-0.00290368
D9	9	SPX3	0.331759	-0.00269958
D9	10	SPX3	0.334117	0.000796932
D9	11	SPX3	0.334087	0.00190685
D9	12	SPX3	0.329491	-0.00155018
D9	13	SPX3	0.328844	-0.00105798
D9	14	SPX3	0.326204	-0.00255851
D9	15	SPX3	0.323857	-0.00376599
D9	16	SPX3	0.32672	0.000236444
D9	17	SPX3	0.325351	7.30937e-06
D9	18	SPX3	0.320696	-0.00350896
D9	19	SPX3	0.321405	-0.00166052
D9	20	SPX3	0.322722	0.000795509
D9	21	SPX3	0.32212	0.00133313
D9	22	SPX3	0.327313	0.00766596
D9	23	SPX3	0.332939	0.0144314
D9	24	SPX3	0.349234	0.0318651
D9	25	SPX3	0.376232	0.0600026
D9	26	SPX3	0.42757	0.11248
D9	27	SPX3	0.523288	0.209337
D9	28	SPX3	0.674573	0.361762
D9	29	SPX3	0.902905	0.591233
D9	30	SPX3	1.15992	0.849384
D9	31	SPX3	1.38734	1.07795
D9	32	SPX3	1.56591	1.25766
D9	33	SPX3	1.73361	1.42649
D9	34	SPX3	1.85389	1.54792
D9	35	SPX3	1.97162	1.66679
D9	36	SPX3	2.05275	1.74905
D9	37	SPX3	2.12391	1.82135
D9	38	SPX3	2.16993	1.86852
D9	39	SPX3	2.20798	1.9077
D9	40	SPX3	2.23037	1.93123
D10	1	SPX4	0.326155	-0.003252
D10	2	SPX4	0.328113	-0.00115199
D10	3	SPX4	0.329157	3.39389e-05
D10	4	SPX4	0.329635	0.000654612
D10	5	SPX4	0.328787	-5.20809e-05
D10	6	SPX4	0.329386	0.000689202
D10	7	SPX4	0.328831	0.00027645
D10	8	SPX4	0.329767	0.00135456
D10	9	SPX4	0.328173	-9.76394e-05
D10	10	SPX4	0.326874	-0.00125399
D10	11	SPX4	0.32595	-0.00203635
D10	12	SPX4	0.326474	-0.00136954
D10	13	SPX4	0.326673	-0.00102913
D10	14	SPX4	0.326662	-0.000897753
D10	15	SPX4	0.328228	0.000810049
D10	16	SPX4	0.330193	0.00291768
D10	17	SPX4	0.335828	0.00869472
D10	18	SPX4	0.349268	0.0222766
D10	19	SPX4	0.368364	0.041515
D10	20	SPX4	0.410752	0.0840451
D10	21	SPX4	0.488964	0.1624
D10	22	SPX4	0.625724	0.299301
D10	23	SPX4	0.843261	0.51698
D10	24	SPX4	1.10991	0.783771
D10	25	SPX4	1.32374	0.997748
D10	26	SPX4	1.49178	1.16593
D10	27	SPX4	1.65078	1.32506
D10	28	SPX4	1.80393	1.47836
D10	29	SPX4	1.95581	1.63039
D10	30	SPX4	2.08699	1.76171
D10	31	SPX4	2.1966	1.87146
D10	32	SPX4	2.28527	1.96027
D10	33	SPX4	2.35201	2.02715
D10	34	SPX4	2.40836	2.08364
D10	35	SPX4	2.46526	2.14069
D10	36	SPX4	2.50833	2.1839
D10	37	SPX4	2.53901	2.21472
D10	38	SPX4	2.57404	2.24989
D10	39	SPX4	2.60144	2.27743
D10	40	SPX4	2.62781	2.30394
D11	1	SPX4	0.330867	-0.00102713
D11	2	SPX4	0.333895	0.002366
D11	3	SPX4	0.331819	0.000654851
D11	4	SPX4	0.331151	0.000352102
D11	5	SPX4	0.331386	0.000952156
D11	6	SPX4	0.32866	-0.0014094
D11	7	SPX4	0.330285	0.000581442
D11	8	SPX4	0.330865	0.0015264
D11	9	SPX4	0.327106	-0.00186798
D11	10	SPX4	0.33137	0.00276078
D11	11	SPX4	0.325353	-0.00289089
D11	12	SPX4	0.325777	-0.00210237
D11	13	SPX4	0.32403	-0.00348399
D11	14	SPX4	0.327824	0.000675383
D11	15	SPX4	0.328698	0.00191419
D11	16	SPX4	0.328756	0.00233734
D11	17	SPX4	0.336595	0.0105412
D11	18	SPX4	0.348421	0.0227316
D11	19	SPX4	0.3704	0.0450762
D11	20	SPX4	0.411731	0.0867725
D11	21	SPX4	0.492952	0.168358
D11	22	SPX4	0.631384	0.307155
D11	23	SPX4	0.850846	0.526982
D11	24	SPX4	1.08895	0.765449
D11	25	SPX4	1.27008	0.946945
D11	26	SPX4	1.42327	1.1005
D11	27	SPX4	1.57632	1.25392
D11	28	SPX4	1.72983	1.40779
D11	29	SPX4	1.88394	1.56227
D11	30	SPX4	2.02548	1.70417
D11	31	SPX4	2.12119	1.80024
D11	32	SPX4	2.20877	1.88819
D11	33	SPX4	2.28253	1.96232
D11	34	SPX4	2.34752	2.02767
D11	35	SPX4	2.39181	2.07232
D11	36	SPX4	2.44261	2.12349
D11	37	SPX4	2.48442	2.16566
D11	38	SPX4	2.51749	2.1991
D11	39	SPX4	2.54643	2.22841
D11	40	SPX4	2.55888	2.24122
D12	1	SPX4	1.07133	-0.0152871
D12	2	SPX4	1.07794	-0.00567033
D12	3	SPX4	1.07702	-0.00357864
D12	4	SPX4	1.07965	0.00205333
D12	5	SPX4	1.0781	0.00350534
D12	6	SPX4	1.07538	0.00379434
D12	7	SPX4	1.07037	0.00178988
D12	8	SPX4	1.0673	0.001729
D12	9	SPX4	1.06331	0.000745089
D12	10	SPX4	1.05466	-0.00490301
D12	11	SPX4	1.05149	-0.00506175
D12	12	SPX4	1.05078	-0.00276526
D12	13	SPX4	1.04668	-0.0038604
D12	14	SPX4	1.04589	-0.00164223
D12	15	SPX4	1.04349	-0.00104054
D12	16	SPX4	1.04267	0.00115271
D12	17	SPX4	1.0466	0.00808215
D12	18	SPX4	1.05022	0.0147149
D12	19	SPX4	1.07053	0.0380258
D12	20	SPX4	1.11032	0.0808278
D12	21	SPX4	1.1833	0.156807
D12	22	SPX4	1.30842	0.284936
D12	23	SPX4	1.50913	0.488653
D12	24	SPX4	1.73134	0.71387
D12	25	SPX4	1.91363	0.899171
D12	26	SPX4	2.05151	1.04005
D12	27	SPX4	2.18576	1.17731
D12	28	SPX4	2.33184	1.3264
D12	29	SPX4	2.47319	1.47075
D12	30	SPX4	2.59125	1.59182
D12	31	SPX4	2.69286	1.69644
D12	32	SPX4	2.75858	1.76516
D12	33	SPX4	2.8298	1.83939
D12	34	SPX4	2.88329	1.89589
D12	35	SPX4	2.93002	1.94562
D12	36	SPX4	2.9688	1.98741
D12	37	SPX4	2.99664	2.01826
D12	38	SPX4	3.0297	2.05432
D12	39	SPX4	3.0496	2.07723
D12	40	SPX4	3.07464	2.10528
E1	1	SPX1	0.32503	-0.00293761
E1	2	SPX1	0.325516	-0.00213011
E1	3	SPX1	0.326829	-0.000496223
E1	4	SPX1	0.327489	0.000485918
E1	5	SPX1	0.328286	0.00160348
E1	6	SPX1	0.324998	-0.0013631
E1	7	SPX1	0.325454	-0.000586144
E1	8	SPX1	0.325385	-0.000332879
E1	9	SPX1	0.329257	0.00386013
E1	10	SPX1	0.323991	-0.00108433
E1	11	SPX1	0.325465	0.000710756
E1	12	SPX1	0.322828	-0.00160497
E1	13	SPX1	0.322404	-0.00170775
E1	14	SPX1	0.324993	0.00120275
E1	15	SPX1	0.320144	-0.00332499
E1	16	SPX1	0.32519	0.00204187
E1	17	SPX1	0.320744	-0.0020824
E1	18	SPX1	0.321401	-0.00110396
E1	19	SPX1	0.325966	0.00378184
E1	20	SPX1	0.330545	0.00868263
E1	21	SPX1	0.34118	0.0196383
E1	22	SPX1	0.364794	0.0435744
E1	23	SPX1	0.407101	0.0862023
E1	24	SPX1	0.479508	0.15893
E1	25	SPX1	0.595436	0.27518
E1	26	SPX1	0.750503	0.430568
E1	27	SPX1	0.884193	0.56458
E1	28	SPX1	0.95679	0.637498
E1	29	SPX1	1.05008	0.731111
E1	30	SPX1	1.15772	0.839075
E1	31	SPX1	1.27395	0.955622
E1	32	SPX1	1.38134	1.06333
E1	33	SPX1	1.49787	1.18019
E1	34	SPX1	1.5913	1.27394
E1	35	SPX1	1.68371	1.36667
E1	36	SPX1	1.76068	1.44395
E1	37	SPX1	1.82869	1.51229
E1	38	SPX1	1.89164	1.57556
E1	39	SPX1	1.94455	1.62879
E1	40	SPX1	1.9918	1.67637
E2	1	SPX1	0.339635	0.00635702
E2	2	SPX1	0.337441	0.00436201
E2	3	SPX1	0.332949	6.98631e-05
E2	4	SPX1	0.334139	0.0014603
E2	5	SPX1	0.333954	0.0014748
E2	6	SPX1	0.332745	0.000465767
E2	7	SPX1	0.331977	-0.000103206
E2	8	SPX1	0.332146	0.000266058
E2	9	SPX1	0.332957	0.001277
E2	10	SPX1	0.330437	-0.00104307
E2	11	SPX1	0.329975	-0.00130538
E2	12	SPX1	0.328794	-0.00228649
E2	13	SPX1	0.328603	-0.00227834
E2	14	SPX1	0.327222	-0.0034593
E2	15	SPX1	0.331022	0.000539945
E2	16	SPX1	0.330201	-8.1033e-05
E2	17	SPX1	0.330408	0.000325543
E2	18	SPX1	0.329934	5.218e-05
E2	19	SPX1	0.334308	0.00462536
E2	20	SPX1	0.338253	0.00876983
E2	21	SPX1	0.353619	0.0243366
E2	22	SPX1	0.370516	0.0414333
E2	23	SPX1	0.408414	0.0795308
E2	24	SPX1	0.48298	0.154297
E2	25	SPX1	0.600137	0.271653
E2	26	SPX1	0.768234	0.43995
E2	27	SPX1	0.947825	0.619741
E2	28	SPX1	1.06739	0.73951
E2	29	SPX1	1.17098	0.843295
E2	30	SPX1	1.28576	0.958277
E2	31	SPX1	1.41266	1.08538
E2	32	SPX1	1.54176	1.21467
E2	33	SPX1	1.65625	1.32937
[truncated: 1,847 more rows]

## Sheet: BioGroup Analysis Result
Block Type	96alum
Chemistry	SYBR_GREEN
Experiment File Name	D:\ShuJu\LZM\7 sample with IAA.eds
Experiment Run End Time	2023-08-17 00:01:40 AM CST
Instrument Type	sds7500
Passive Reference	ROX
Biogroup Name	Target Name	Task	RQ	RQ Min	RQ Max	Cт Mean	ΔCт Mean	ΔCт SE	ΔΔCт
Analysis Type	Singleplex
Endogenous Control	SPX1
RQ Min/Max Confidence Level	95.0
Reference Biogroup Name

## Sheet: Technical Analysis Result
Block Type	96alum
Chemistry	SYBR_GREEN
Experiment File Name	D:\ShuJu\LZM\7 sample with IAA.eds
Experiment Run End Time	2023-08-17 00:01:40 AM CST
Instrument Type	sds7500
Passive Reference	ROX
Sample Name	Target Name	Task	RQ	RQ Min	RQ Max	Cт Mean	ΔCт Mean	ΔCт SE	ΔΔCт
od	SPX2	UNKNOWN	1	0.694266	1.44037	27.583	0.838831	0.189609	0
od	SPX3	UNKNOWN	1	0.736133	1.35845	26.9034	0.159306	0.159183	0
od	SPX4	UNKNOWN	1	0.744709	1.34281	22.4287	-4.31547	0.153164	0
1d lp	SPX2	UNKNOWN	0.414343	0.296121	0.579763	28.4048	2.10993	0.174553	1.2711
1d lp	SPX3	UNKNOWN	0.539477	0.49071	0.593091	27.3446	1.04967	0.0492324	0.890366
1d lp	SPX4	UNKNOWN	0.548624	0.331719	0.907361	22.8455	-3.44936	0.261434	0.86611
1d lp+iaa	SPX2	UNKNOWN	2.33987	1.90173	2.87895	27.4161	-0.387596	0.107733	-1.22643
1d lp+iaa	SPX3	UNKNOWN	1.66038	1.35113	2.04042	27.2315	-0.572212	0.107098	-0.731517
1d lp+iaa	SPX4	UNKNOWN	1.20412	1.01652	1.42634	23.2202	-4.58345	0.0880047	-0.267976
5d lp	SPX2	UNKNOWN	0.245181	0.194015	0.309841	27.0818	2.86691	0.121623	2.02808
5d lp	SPX3	UNKNOWN	0.109934	0.0918466	0.131582	27.5595	3.3446	0.0934046	3.1853
5d lp	SPX4	UNKNOWN	0.488127	0.45796	0.520282	20.9341	-3.2808	0.0331485	1.03467
5d lp+iaa	SPX2	UNKNOWN	0.133029	0.114705	0.15428	27.42	3.74902	0.0770096	2.91019
5d lp+iaa	SPX3	UNKNOWN	0.0708193	0.0619325	0.0809813	27.65	3.97902	0.069674	3.81971
5d lp+iaa	SPX4	UNKNOWN	0.347345	0.306084	0.394168	20.8811	-2.78991	0.0657107	1.52556
10d lp	SPX2	UNKNOWN	0.00547441	0.00414534	0.0072296	28.078	8.35191	0.144506	7.51308
10d lp	SPX3	UNKNOWN	0.00519471	0.00368203	0.00732884	27.4741	7.74805	0.178841	7.58874
10d lp	SPX4	UNKNOWN	0.060632	0.0511775	0.071833	19.4544	-0.271692	0.0880867	4.04378
10d lp+ iaa	SPX2	UNKNOWN	0.00630455	0.00438609	0.00906214	26.6406	8.14822	0.188536	7.30939
10d lp+ iaa	SPX3	UNKNOWN	0.0038821	0.00237914	0.00633453	26.6606	8.16825	0.254426	8.00895
10d lp+ iaa	SPX4	UNKNOWN	0.0454495	0.0295304	0.0699503	18.6365	0.144122	0.224051	4.45959
od	actin	UNKNOWN	1	0.749729	1.33381	20.829	-5.91511	0.149673	0
1d lp	actin	UNKNOWN	0.479237	0.434848	0.528157	21.441	-4.85392	0.050506	1.06119
1d lp+iaa	actin	UNKNOWN	1.86148	1.54721	2.23958	20.9921	-6.81156	0.0960864	-0.896451
5d lp	actin	UNKNOWN	0.215201	0.153049	0.302592	20.516	-3.69887	0.177093	2.21624
Analysis Type	Singleplex
Endogenous Control	SPX1
RQ Min/Max Confidence Level	95.0
Reference Sample	od
