# Supplementary material for: Genome-wide identification and characterization of SPXdomain-containing genes family in eggplant
Source: PeerJ journal article supplement (doi:10.7717/peerj.17341), 2024-05-28
Supplement: 16SPX_IAA+LP.zip [file spx13-16 iaa +lp.xls]

## Sheet: Sample Setup
Block Type	96alum
Chemistry	SYBR_GREEN
Experiment File Name	D:\ShuJu\LZM\13-16 spx iaa +lp.eds
Experiment Run End Time	2023-08-17 08:06:49 AM CST
Instrument Type	sds7500
Passive Reference	ROX
Well	Sample Name	Sample Color	Biogroup Name	Biogroup Color	Target Name	Target Color	Task	Reporter	Quencher	Comments
A1	0d	RGB(132,193,241)			SPX13	RGB(139,189,249)	UNKNOWN	SYBR	None
A2	0d	RGB(132,193,241)			SPX13	RGB(139,189,249)	UNKNOWN	SYBR	None
A3	0d	RGB(132,193,241)			SPX13	RGB(139,189,249)	UNKNOWN	SYBR	None
A4	0d	RGB(132,193,241)			SPX14	RGB(208,243,98)	UNKNOWN	SYBR	None
A5	0d	RGB(132,193,241)			SPX14	RGB(208,243,98)	UNKNOWN	SYBR	None
A6	0d	RGB(132,193,241)			SPX14	RGB(208,243,98)	UNKNOWN	SYBR	None
A7	0d	RGB(132,193,241)			SPX15	RGB(244,165,230)	UNKNOWN	SYBR	None
A8	0d	RGB(132,193,241)			SPX15	RGB(244,165,230)	UNKNOWN	SYBR	None
A9	0d	RGB(132,193,241)			SPX15	RGB(244,165,230)	UNKNOWN	SYBR	None
A10	0d	RGB(132,193,241)			SPX16	RGB(255,191,168)	UNKNOWN	SYBR	None
A11	0d	RGB(132,193,241)			SPX16	RGB(255,191,168)	UNKNOWN	SYBR	None
A12	0d	RGB(132,193,241)			SPX16	RGB(255,191,168)	UNKNOWN	SYBR	None
B1	1d lp	RGB(168,255,222)			SPX13	RGB(139,189,249)	UNKNOWN	SYBR	None
B2	1d lp	RGB(168,255,222)			SPX13	RGB(139,189,249)	UNKNOWN	SYBR	None
B3	1d lp	RGB(168,255,222)			SPX13	RGB(139,189,249)	UNKNOWN	SYBR	None
B4	1d lp	RGB(168,255,222)			SPX14	RGB(208,243,98)	UNKNOWN	SYBR	None
B5	1d lp	RGB(168,255,222)			SPX14	RGB(208,243,98)	UNKNOWN	SYBR	None
B6	1d lp	RGB(168,255,222)			SPX14	RGB(208,243,98)	UNKNOWN	SYBR	None
B7	1d lp	RGB(168,255,222)			SPX15	RGB(244,165,230)	UNKNOWN	SYBR	None
B8	1d lp	RGB(168,255,222)			SPX15	RGB(244,165,230)	UNKNOWN	SYBR	None
B9	1d lp	RGB(168,255,222)			SPX15	RGB(244,165,230)	UNKNOWN	SYBR	None
B10	1d lp	RGB(168,255,222)			SPX16	RGB(255,191,168)	UNKNOWN	SYBR	None
B11	1d lp	RGB(168,255,222)			SPX16	RGB(255,191,168)	UNKNOWN	SYBR	None
B12	1d lp	RGB(168,255,222)			SPX16	RGB(255,191,168)	UNKNOWN	SYBR	None
C1	1d lp+iaa	RGB(223,221,142)			SPX13	RGB(139,189,249)	UNKNOWN	SYBR	None
C2	1d lp+iaa	RGB(223,221,142)			SPX13	RGB(139,189,249)	UNKNOWN	SYBR	None
C3	1d lp+iaa	RGB(223,221,142)			SPX13	RGB(139,189,249)	UNKNOWN	SYBR	None
C4	1d lp+iaa	RGB(223,221,142)			SPX14	RGB(208,243,98)	UNKNOWN	SYBR	None
C5	1d lp+iaa	RGB(223,221,142)			SPX14	RGB(208,243,98)	UNKNOWN	SYBR	None
C6	1d lp+iaa	RGB(223,221,142)			SPX14	RGB(208,243,98)	UNKNOWN	SYBR	None
C7	1d lp+iaa	RGB(223,221,142)			SPX15	RGB(244,165,230)	UNKNOWN	SYBR	None
C8	1d lp+iaa	RGB(223,221,142)			SPX15	RGB(244,165,230)	UNKNOWN	SYBR	None
C9	1d lp+iaa	RGB(223,221,142)			SPX15	RGB(244,165,230)	UNKNOWN	SYBR	None
C10	1d lp+iaa	RGB(223,221,142)			SPX16	RGB(255,191,168)	UNKNOWN	SYBR	None
C11	1d lp+iaa	RGB(223,221,142)			SPX16	RGB(255,191,168)	UNKNOWN	SYBR	None
C12	1d lp+iaa	RGB(223,221,142)			SPX16	RGB(255,191,168)	UNKNOWN	SYBR	None
D1	5d lp	RGB(247,255,168)			SPX13	RGB(139,189,249)	UNKNOWN	SYBR	None
D2	5d lp	RGB(247,255,168)			SPX13	RGB(139,189,249)	UNKNOWN	SYBR	None
D3	5d lp	RGB(247,255,168)			SPX13	RGB(139,189,249)	UNKNOWN	SYBR	None
D4	5d lp	RGB(247,255,168)			SPX14	RGB(208,243,98)	UNKNOWN	SYBR	None
D5	5d lp	RGB(247,255,168)			SPX14	RGB(208,243,98)	UNKNOWN	SYBR	None
D6	5d lp	RGB(247,255,168)			SPX14	RGB(208,243,98)	UNKNOWN	SYBR	None
D7	5d lp	RGB(247,255,168)			SPX15	RGB(244,165,230)	UNKNOWN	SYBR	None
D8	5d lp	RGB(247,255,168)			SPX15	RGB(244,165,230)	UNKNOWN	SYBR	None
D9	5d lp	RGB(247,255,168)			SPX15	RGB(244,165,230)	UNKNOWN	SYBR	None
D10	5d lp	RGB(247,255,168)			SPX16	RGB(255,191,168)	UNKNOWN	SYBR	None
D11	5d lp	RGB(247,255,168)			SPX16	RGB(255,191,168)	UNKNOWN	SYBR	None
D12	5d lp	RGB(247,255,168)			SPX16	RGB(255,191,168)	UNKNOWN	SYBR	None
E1	5d lp+ iaa	RGB(180,255,0)			SPX13	RGB(139,189,249)	UNKNOWN	SYBR	None
E2	5d lp+ iaa	RGB(180,255,0)			SPX13	RGB(139,189,249)	UNKNOWN	SYBR	None
E3	5d lp+ iaa	RGB(180,255,0)			SPX13	RGB(139,189,249)	UNKNOWN	SYBR	None
E4	5d lp+ iaa	RGB(180,255,0)			SPX14	RGB(208,243,98)	UNKNOWN	SYBR	None
E5	5d lp+ iaa	RGB(180,255,0)			SPX14	RGB(208,243,98)	UNKNOWN	SYBR	None
E6	5d lp+ iaa	RGB(180,255,0)			SPX14	RGB(208,243,98)	UNKNOWN	SYBR	None
E7	5d lp+ iaa	RGB(180,255,0)			SPX15	RGB(244,165,230)	UNKNOWN	SYBR	None
E8	5d lp+ iaa	RGB(180,255,0)			SPX15	RGB(244,165,230)	UNKNOWN	SYBR	None
E9	5d lp+ iaa	RGB(180,255,0)			SPX15	RGB(244,165,230)	UNKNOWN	SYBR	None
E10	5d lp+ iaa	RGB(180,255,0)			SPX16	RGB(255,191,168)	UNKNOWN	SYBR	None
E11	5d lp+ iaa	RGB(180,255,0)			SPX16	RGB(255,191,168)	UNKNOWN	SYBR	None
E12	5d lp+ iaa	RGB(180,255,0)			SPX16	RGB(255,191,168)	UNKNOWN	SYBR	None
F1	10d lp	RGB(255,204,153)			SPX13	RGB(139,189,249)	UNKNOWN	SYBR	None
F2	10d lp	RGB(255,204,153)			SPX13	RGB(139,189,249)	UNKNOWN	SYBR	None
F3	10d lp	RGB(255,204,153)			SPX13	RGB(139,189,249)	UNKNOWN	SYBR	None
F4	10d lp	RGB(255,204,153)			SPX14	RGB(208,243,98)	UNKNOWN	SYBR	None
F5	10d lp	RGB(255,204,153)			SPX14	RGB(208,243,98)	UNKNOWN	SYBR	None
F6	10d lp	RGB(255,204,153)			SPX14	RGB(208,243,98)	UNKNOWN	SYBR	None
F7	10d lp	RGB(255,204,153)			SPX15	RGB(244,165,230)	UNKNOWN	SYBR	None
F8	10d lp	RGB(255,204,153)			SPX15	RGB(244,165,230)	UNKNOWN	SYBR	None
F9	10d lp	RGB(255,204,153)			SPX15	RGB(244,165,230)	UNKNOWN	SYBR	None
F10	10d lp	RGB(255,204,153)			SPX16	RGB(255,191,168)	UNKNOWN	SYBR	None
F11	10d lp	RGB(255,204,153)			SPX16	RGB(255,191,168)	UNKNOWN	SYBR	None
F12	10d lp	RGB(255,204,153)			SPX16	RGB(255,191,168)	UNKNOWN	SYBR	None
G1	10d lp+ iaa	RGB(253,138,88)			SPX13	RGB(139,189,249)	UNKNOWN	SYBR	None
G2	10d lp+ iaa	RGB(253,138,88)			SPX13	RGB(139,189,249)	UNKNOWN	SYBR	None
G3	10d lp+ iaa	RGB(253,138,88)			SPX13	RGB(139,189,249)	UNKNOWN	SYBR	None
G4	10d lp+ iaa	RGB(253,138,88)			SPX14	RGB(208,243,98)	UNKNOWN	SYBR	None
G5	10d lp+ iaa	RGB(253,138,88)			SPX14	RGB(208,243,98)	UNKNOWN	SYBR	None
G6	10d lp+ iaa	RGB(253,138,88)			SPX14	RGB(208,243,98)	UNKNOWN	SYBR	None
G7	10d lp+ iaa	RGB(253,138,88)			SPX15	RGB(244,165,230)	UNKNOWN	SYBR	None
G8	10d lp+ iaa	RGB(253,138,88)			SPX15	RGB(244,165,230)	UNKNOWN	SYBR	None
G9	10d lp+ iaa	RGB(253,138,88)			SPX15	RGB(244,165,230)	UNKNOWN	SYBR	None
G10	10d lp+ iaa	RGB(253,138,88)			SPX16	RGB(255,191,168)	UNKNOWN	SYBR	None
G11	10d lp+ iaa	RGB(253,138,88)			SPX16	RGB(255,191,168)	UNKNOWN	SYBR	None
G12	10d lp+ iaa	RGB(253,138,88)			SPX16	RGB(255,191,168)	UNKNOWN	SYBR	None
H1	5d lp	RGB(247,255,168)			SPX8	RGB(243,124,98)	UNKNOWN	SYBR	None
H2	5d lp	RGB(247,255,168)			SPX8	RGB(243,124,98)	UNKNOWN	SYBR	None
H3	5d lp	RGB(247,255,168)			SPX8	RGB(243,124,98)	UNKNOWN	SYBR	None
H4	5d lp+ iaa	RGB(180,255,0)			SPX8	RGB(243,124,98)	UNKNOWN	SYBR	None
H5	5d lp+ iaa	RGB(180,255,0)			SPX8	RGB(243,124,98)	UNKNOWN	SYBR	None
H6	5d lp+ iaa	RGB(180,255,0)			SPX8	RGB(243,124,98)	UNKNOWN	SYBR	None
H7	10d lp	RGB(255,204,153)			SPX8	RGB(243,124,98)	UNKNOWN	SYBR	None
H8	10d lp	RGB(255,204,153)			SPX8	RGB(243,124,98)	UNKNOWN	SYBR	None
H9	10d lp	RGB(255,204,153)			SPX8	RGB(243,124,98)	UNKNOWN	SYBR	None
H10	10d lp+ iaa	RGB(253,138,88)			SPX8	RGB(243,124,98)	UNKNOWN	SYBR	None
H11	10d lp+ iaa	RGB(253,138,88)			SPX8	RGB(243,124,98)	UNKNOWN	SYBR	None
H12	10d lp+ iaa	RGB(253,138,88)			SPX8	RGB(243,124,98)	UNKNOWN	SYBR	None

## Sheet: Results
Block Type	96alum
Chemistry	SYBR_GREEN
Experiment File Name	D:\ShuJu\LZM\13-16 spx iaa +lp.eds
Experiment Run End Time	2023-08-17 08:06:49 AM CST
Instrument Type	sds7500
Passive Reference	ROX
Well	Sample Name	Target Name	Task	Reporter	Quencher	RQ	RQ Min	RQ Max	Cт	Cт Mean	Cт SD	ΔCт	ΔCт Mean	ΔCт SE	HK Control ΔCт Mean	HK Control ΔCт SE	ΔΔCт	Automatic Ct Threshold	Ct Threshold	Automatic Baseline	Baseline Start	Baseline End	Efficiency	Tm1	Tm2	Tm3	Comments	HIGHSD	NOAMP	EXPFAIL	MTP
A1	0d	SPX13	UNKNOWN	SYBR	None				25.9145	25.5593	0.316819							TRUE	0.275502	TRUE	3	20	1	78.0623				N	N	N	N
A2	0d	SPX13	UNKNOWN	SYBR	None				25.3059	25.5593	0.316819							TRUE	0.275502	TRUE	3	20	1	78.0623				N	N	N	N
A3	0d	SPX13	UNKNOWN	SYBR	None				25.4575	25.5593	0.316819							TRUE	0.275502	TRUE	3	20	1	78.2554				N	N	N	N
A4	0d	SPX14	UNKNOWN	SYBR	None	1	0.18956	5.27538	36.9307	36.1993	1.03433		10.64	0.753909			0	TRUE	0.122195	TRUE	3	33	1	78.2554				Y	N	N	N
A5	0d	SPX14	UNKNOWN	SYBR	None	1	0.18956	5.27538	Undetermined	36.1993	1.03433		10.64	0.753909			0	TRUE	0.122195	TRUE	3	39	1	62.4177				N	Y	Y	N
A6	0d	SPX14	UNKNOWN	SYBR	None	1	0.18956	5.27538	35.4679	36.1993	1.03433		10.64	0.753909			0	TRUE	0.122195	TRUE	3	31	1	78.4486				Y	N	N	N
A7	0d	SPX15	UNKNOWN	SYBR	None	1	0.630639	1.58569	26.8961	26.6098	0.267929		1.05052	0.239555			0	TRUE	0.174095	TRUE	3	22	1	81.1526				N	N	N	N
A8	0d	SPX15	UNKNOWN	SYBR	None	1	0.630639	1.58569	26.365	26.6098	0.267929		1.05052	0.239555			0	TRUE	0.174095	TRUE	3	22	1	80.9594				N	N	N	N
A9	0d	SPX15	UNKNOWN	SYBR	None	1	0.630639	1.58569	26.5684	26.6098	0.267929		1.05052	0.239555			0	TRUE	0.174095	TRUE	3	22	1	80.9594				N	N	N	N
A10	0d	SPX16	UNKNOWN	SYBR	None	1	0.697388	1.43392	27.9208	27.8463	0.0695988		2.28694	0.187277			0	TRUE	0.313475	TRUE	3	21	1	78.8349				N	N	N	N
A11	0d	SPX16	UNKNOWN	SYBR	None	1	0.697388	1.43392	27.8349	27.8463	0.0695988		2.28694	0.187277			0	TRUE	0.313475	TRUE	3	22	1	78.6417				N	N	N	N
A12	0d	SPX16	UNKNOWN	SYBR	None	1	0.697388	1.43392	27.783	27.8463	0.0695988		2.28694	0.187277			0	TRUE	0.313475	TRUE	3	22	1	78.4486				N	N	N	N
B1	1d lp	SPX13	UNKNOWN	SYBR	None				27.8339	27.9591	0.157302							TRUE	0.275502	TRUE	3	22	1	78.0623				N	N	N	N
B2	1d lp	SPX13	UNKNOWN	SYBR	None				27.9077	27.9591	0.157302							TRUE	0.275502	TRUE	3	23	1	78.2554				N	N	N	N
B3	1d lp	SPX13	UNKNOWN	SYBR	None				28.1356	27.9591	0.157302							TRUE	0.275502	TRUE	3	23	1	78.4486				N	N	N	N
B4	1d lp	SPX14	UNKNOWN	SYBR	None	7.02996	2.28796	21.6002	36.2862	35.7855	0.708099		7.82644	0.508872			-2.81352	TRUE	0.122195	TRUE	3	32	1	78.4486				Y	N	N	N
B5	1d lp	SPX14	UNKNOWN	SYBR	None	7.02996	2.28796	21.6002	Undetermined	35.7855	0.708099		7.82644	0.508872			-2.81352	TRUE	0.122195	TRUE	3	39	1	62.2246				N	Y	Y	N
B6	1d lp	SPX14	UNKNOWN	SYBR	None	7.02996	2.28796	21.6002	35.2848	35.7855	0.708099		7.82644	0.508872			-2.81352	TRUE	0.122195	TRUE	3	31	1	78.6417				Y	N	N	N
B7	1d lp	SPX15	UNKNOWN	SYBR	None	4.57525	2.78633	7.51273	27.1259	26.8158	0.41771		-1.14333	0.257698			-2.19385	TRUE	0.174095	TRUE	3	22	1	81.3457				N	N	N	N
B8	1d lp	SPX15	UNKNOWN	SYBR	None	4.57525	2.78633	7.51273	26.9806	26.8158	0.41771		-1.14333	0.257698			-2.19385	TRUE	0.174095	TRUE	3	22	1	81.3457				N	N	N	N
B9	1d lp	SPX15	UNKNOWN	SYBR	None	4.57525	2.78633	7.51273	26.3408	26.8158	0.41771		-1.14333	0.257698			-2.19385	TRUE	0.174095	TRUE	3	21	1	81.1526				N	N	N	N
B10	1d lp	SPX16	UNKNOWN	SYBR	None	2.87425	1.80821	4.56876	28.2773	28.7228	0.386311		0.763756	0.240818			-1.52318	TRUE	0.313475	TRUE	3	23	1	79.028				N	N	N	N
B11	1d lp	SPX16	UNKNOWN	SYBR	None	2.87425	1.80821	4.56876	28.9272	28.7228	0.386311		0.763756	0.240818			-1.52318	TRUE	0.313475	TRUE	3	24	1	78.8349				N	N	N	N
B12	1d lp	SPX16	UNKNOWN	SYBR	None	2.87425	1.80821	4.56876	28.9641	28.7228	0.386311		0.763756	0.240818			-1.52318	TRUE	0.313475	TRUE	3	23	1	78.6417				N	N	N	N
C1	1d lp+iaa	SPX13	UNKNOWN	SYBR	None				26.9556	27.0257	0.0692526							TRUE	0.275502	TRUE	3	21	1	78.2554				N	N	N	N
C2	1d lp+iaa	SPX13	UNKNOWN	SYBR	None				27.094	27.0257	0.0692526							TRUE	0.275502	TRUE	3	21	1	78.4486				N	N	N	N
C3	1d lp+iaa	SPX13	UNKNOWN	SYBR	None				27.0275	27.0257	0.0692526							TRUE	0.275502	TRUE	3	21	1	78.6417				N	N	N	N
C4	1d lp+iaa	SPX14	UNKNOWN	SYBR	None	3.90283	2.7864	5.46659	35.8486	35.7012	0.20849		8.67544	0.15275			-1.96452	TRUE	0.122195	TRUE	3	32	1	78.8349	84.0497			N	N	N	Y
C5	1d lp+iaa	SPX14	UNKNOWN	SYBR	None	3.90283	2.7864	5.46659	Undetermined	35.7012	0.20849		8.67544	0.15275			-1.96452	TRUE	0.122195	TRUE	3	39	1	62.0314				N	Y	Y	N
C6	1d lp+iaa	SPX14	UNKNOWN	SYBR	None	3.90283	2.7864	5.46659	35.5537	35.7012	0.20849		8.67544	0.15275			-1.96452	TRUE	0.122195	TRUE	3	31	1	78.8349				N	N	N	N
C7	1d lp+iaa	SPX15	UNKNOWN	SYBR	None	2.99934	1.83152	4.9118	26.9288	26.4916	0.438491		-0.534126	0.256301			-1.58465	TRUE	0.174095	TRUE	3	22	1	81.5389				N	N	N	N
C8	1d lp+iaa	SPX15	UNKNOWN	SYBR	None	2.99934	1.83152	4.9118	26.4942	26.4916	0.438491		-0.534126	0.256301			-1.58465	TRUE	0.174095	TRUE	3	22	1	81.5389				N	N	N	N
C9	1d lp+iaa	SPX15	UNKNOWN	SYBR	None	2.99934	1.83152	4.9118	26.0518	26.4916	0.438491		-0.534126	0.256301			-1.58465	TRUE	0.174095	TRUE	3	21	1	81.3457				N	N	N	N
C10	1d lp+iaa	SPX16	UNKNOWN	SYBR	None	2.43937	2.1146	2.81401	27.9561	28.0262	0.108344		1.00043	0.074239			-1.28651	TRUE	0.313475	TRUE	3	22	1	79.028				N	N	N	N
C11	1d lp+iaa	SPX16	UNKNOWN	SYBR	None	2.43937	2.1146	2.81401	27.9714	28.0262	0.108344		1.00043	0.074239			-1.28651	TRUE	0.313475	TRUE	3	22	1	79.028				N	N	N	N
C12	1d lp+iaa	SPX16	UNKNOWN	SYBR	None	2.43937	2.1146	2.81401	28.1509	28.0262	0.108344		1.00043	0.074239			-1.28651	TRUE	0.313475	TRUE	3	22	1	78.6417				N	N	N	N
D1	5d lp	SPX13	UNKNOWN	SYBR	None				27.541	27.4957	0.19149							TRUE	0.275502	TRUE	3	22	1	78.4486				N	N	N	N
D2	5d lp	SPX13	UNKNOWN	SYBR	None				27.2856	27.4957	0.19149							TRUE	0.275502	TRUE	3	22	1	78.6417				N	N	N	N
D3	5d lp	SPX13	UNKNOWN	SYBR	None				27.6604	27.4957	0.19149							TRUE	0.275502	TRUE	3	22	1	78.8349				N	N	N	N
D4	5d lp	SPX14	UNKNOWN	SYBR	None	2.19205			37.0033	37.0033			9.50768				-1.13228	TRUE	0.122195	TRUE	3	33	1	78.8349				N	N	N	N
D5	5d lp	SPX14	UNKNOWN	SYBR	None	2.19205			Undetermined	37.0033			9.50768				-1.13228	TRUE	0.122195	TRUE	3	39	1	61.8383				N	Y	Y	N
D6	5d lp	SPX14	UNKNOWN	SYBR	None	2.19205			Undetermined	37.0033			9.50768				-1.13228	TRUE	0.122195	TRUE	3	39	1	62.0314				N	N	Y	N
D7	5d lp	SPX15	UNKNOWN	SYBR	None	5.64797	4.55449	7.00398	26.0806	26.0484	0.0289455		-1.44721	0.111813			-2.49773	TRUE	0.174095	TRUE	3	21	1	81.5389				N	N	N	N
D8	5d lp	SPX15	UNKNOWN	SYBR	None	5.64797	4.55449	7.00398	26.0245	26.0484	0.0289455		-1.44721	0.111813			-2.49773	TRUE	0.174095	TRUE	3	21	1	81.5389				N	N	N	N
D9	5d lp	SPX15	UNKNOWN	SYBR	None	5.64797	4.55449	7.00398	26.0403	26.0484	0.0289455		-1.44721	0.111813			-2.49773	TRUE	0.174095	TRUE	3	21	1	81.5389				N	N	N	N
D10	5d lp	SPX16	UNKNOWN	SYBR	None	4.42281	3.3559	5.82892	27.4665	27.6376	0.158303		0.141975	0.143444			-2.14496	TRUE	0.313475	TRUE	3	22	1	79.2211				N	N	N	N
D11	5d lp	SPX16	UNKNOWN	SYBR	None	4.42281	3.3559	5.82892	27.7788	27.6376	0.158303		0.141975	0.143444			-2.14496	TRUE	0.313475	TRUE	3	22	1	79.028				N	N	N	N
D12	5d lp	SPX16	UNKNOWN	SYBR	None	4.42281	3.3559	5.82892	27.6677	27.6376	0.158303		0.141975	0.143444			-2.14496	TRUE	0.313475	TRUE	3	22	1	78.6417				N	N	N	N
E1	5d lp+ iaa	SPX13	UNKNOWN	SYBR	None				27.8746	27.9093	0.0834179							TRUE	0.275502	TRUE	3	22	1	78.6417				N	N	N	N
E2	5d lp+ iaa	SPX13	UNKNOWN	SYBR	None				28.0045	27.9093	0.0834179							TRUE	0.275502	TRUE	3	23	1	78.6417				N	N	N	N
E3	5d lp+ iaa	SPX13	UNKNOWN	SYBR	None				27.8488	27.9093	0.0834179							TRUE	0.275502	TRUE	3	22	1	78.8349				N	N	N	N
E4	5d lp+ iaa	SPX14	UNKNOWN	SYBR	None				Undetermined									TRUE	0.122195	TRUE	3	39	1	62.2246				N	Y	Y	N
E5	5d lp+ iaa	SPX14	UNKNOWN	SYBR	None				Undetermined									TRUE	0.122195	TRUE	3	39	1	62.0314				N	Y	Y	N
E6	5d lp+ iaa	SPX14	UNKNOWN	SYBR	None				Undetermined									TRUE	0.122195	TRUE	3	39	1	62.0314				N	Y	Y	N
E7	5d lp+ iaa	SPX15	UNKNOWN	SYBR	None	8.1411	5.92083	11.194	26.1926	25.9346	0.274198		-1.9747	0.165472			-3.02522	TRUE	0.174095	TRUE	3	21	1	81.732				N	N	N	N
E8	5d lp+ iaa	SPX15	UNKNOWN	SYBR	None	8.1411	5.92083	11.194	25.6467	25.9346	0.274198		-1.9747	0.165472			-3.02522	TRUE	0.174095	TRUE	3	20	1	81.5389				N	N	N	N
E9	5d lp+ iaa	SPX15	UNKNOWN	SYBR	None	8.1411	5.92083	11.194	25.9646	25.9346	0.274198		-1.9747	0.165472			-3.02522	TRUE	0.174095	TRUE	3	21	1	81.5389				N	N	N	N
E10	5d lp+ iaa	SPX16	UNKNOWN	SYBR	None	5.92279	4.66394	7.52141	27.5269	27.63	0.198215		-0.279336	0.124161			-2.56628	TRUE	0.313475	TRUE	3	22	1	79.2211				N	N	N	N
E11	5d lp+ iaa	SPX16	UNKNOWN	SYBR	None	5.92279	4.66394	7.52141	27.5045	27.63	0.198215		-0.279336	0.124161			-2.56628	TRUE	0.313475	TRUE	3	22	1	79.028				N	N	N	N
E12	5d lp+ iaa	SPX16	UNKNOWN	SYBR	None	5.92279	4.66394	7.52141	27.8585	27.63	0.198215		-0.279336	0.124161			-2.56628	TRUE	0.313475	TRUE	3	22	1	78.6417				N	N	N	N
F1	10d lp	SPX13	UNKNOWN	SYBR	None				28.2368	28.0976	0.160904							TRUE	0.275502	TRUE	3	23	1	78.2554				N	N	N	N
F2	10d lp	SPX13	UNKNOWN	SYBR	None				27.9214	28.0976	0.160904							TRUE	0.275502	TRUE	3	22	1	78.4486				N	N	N	N
F3	10d lp	SPX13	UNKNOWN	SYBR	None				28.1346	28.0976	0.160904							TRUE	0.275502	TRUE	3	23	1	78.4486				N	N	N	N
F4	10d lp	SPX14	UNKNOWN	SYBR	None	106.218	69.3411	162.708	32.4072	32.0067	0.348461		3.90907	0.221597			-6.73089	TRUE	0.122195	TRUE	3	28	1	78.8349				N	N	N	N
F5	10d lp	SPX14	UNKNOWN	SYBR	None	106.218	69.3411	162.708	31.7731	32.0067	0.348461		3.90907	0.221597			-6.73089	TRUE	0.122195	TRUE	3	27	1	78.8349				N	N	N	N
F6	10d lp	SPX14	UNKNOWN	SYBR	None	106.218	69.3411	162.708	31.8397	32.0067	0.348461		3.90907	0.221597			-6.73089	TRUE	0.122195	TRUE	3	27	1	78.6417				N	N	N	N
F7	10d lp	SPX15	UNKNOWN	SYBR	None	13.4522	10.0004	18.0954	25.6397	25.3984	0.212905		-2.69925	0.154077			-3.74977	TRUE	0.174095	TRUE	3	21	1	81.5389				N	N	N	N
F8	10d lp	SPX15	UNKNOWN	SYBR	None	13.4522	10.0004	18.0954	25.3184	25.3984	0.212905		-2.69925	0.154077			-3.74977	TRUE	0.174095	TRUE	3	20	1	81.5389				N	N	N	N
F9	10d lp	SPX15	UNKNOWN	SYBR	None	13.4522	10.0004	18.0954	25.237	25.3984	0.212905		-2.69925	0.154077			-3.74977	TRUE	0.174095	TRUE	3	20	1	81.3457				N	N	N	N
F10	10d lp	SPX16	UNKNOWN	SYBR	None	3.89502	3.05961	4.95853	28.5907	28.4229	0.146003		0.32531	0.125442			-1.96163	TRUE	0.313475	TRUE	3	22	1	79.2211				N	N	N	N
F11	10d lp	SPX16	UNKNOWN	SYBR	None	3.89502	3.05961	4.95853	28.3248	28.4229	0.146003		0.32531	0.125442			-1.96163	TRUE	0.313475	TRUE	3	23	1	79.028				N	N	N	N
F12	10d lp	SPX16	UNKNOWN	SYBR	None	3.89502	3.05961	4.95853	28.3533	28.4229	0.146003		0.32531	0.125442			-1.96163	TRUE	0.313475	TRUE	3	22	1	78.6417				N	N	N	N
G1	10d lp+ iaa	SPX13	UNKNOWN	SYBR	None				27.3812	26.8189	0.669825							TRUE	0.275502	TRUE	3	22	1	78.0623				Y	N	N	N
G2	10d lp+ iaa	SPX13	UNKNOWN	SYBR	None				26.9976	26.8189	0.669825							TRUE	0.275502	TRUE	3	22	1	78.2554				Y	N	N	N
G3	10d lp+ iaa	SPX13	UNKNOWN	SYBR	None				26.0778	26.8189	0.669825							TRUE	0.275502	TRUE	3	20	1	78.4486				Y	N	N	N
G4	10d lp+ iaa	SPX14	UNKNOWN	SYBR	None	46.4048	19.1303	112.565	32.3799	31.9226	0.432873		5.10376	0.460451			-5.5362	TRUE	0.122195	TRUE	3	28	1	78.6417				N	N	N	N
G5	10d lp+ iaa	SPX14	UNKNOWN	SYBR	None	46.4048	19.1303	112.565	31.8687	31.9226	0.432873		5.10376	0.460451			-5.5362	TRUE	0.122195	TRUE	3	28	1	78.6417				N	N	N	N
G6	10d lp+ iaa	SPX14	UNKNOWN	SYBR	None	46.4048	19.1303	112.565	31.5192	31.9226	0.432873		5.10376	0.460451			-5.5362	TRUE	0.122195	TRUE	3	27	1	78.6417				N	N	N	N
G7	10d lp+ iaa	SPX15	UNKNOWN	SYBR	None	11.5302	4.79441	27.7295	24.798	24.342	0.418428		-2.47683	0.455978			-3.52735	TRUE	0.174095	TRUE	3	20	1	81.3457				N	N	N	N
G8	10d lp+ iaa	SPX15	UNKNOWN	SYBR	None	11.5302	4.79441	27.7295	24.2525	24.342	0.418428		-2.47683	0.455978			-3.52735	TRUE	0.174095	TRUE	3	19	1	81.3457				N	N	N	N
G9	10d lp+ iaa	SPX15	UNKNOWN	SYBR	None	11.5302	4.79441	27.7295	23.9756	24.342	0.418428		-2.47683	0.455978			-3.52735	TRUE	0.174095	TRUE	3	19	1	80.9594				N	N	N	N
G10	10d lp+ iaa	SPX16	UNKNOWN	SYBR	None	3.47675	1.60254	7.54291	27.5306	27.3081	0.19296		0.4892	0.402451			-1.79774	TRUE	0.313475	TRUE	3	21	1	79.028				N	N	N	N
G11	10d lp+ iaa	SPX16	UNKNOWN	SYBR	None	3.47675	1.60254	7.54291	27.1869	27.3081	0.19296		0.4892	0.402451			-1.79774	TRUE	0.313475	TRUE	3	22	1	78.8349				N	N	N	N
G12	10d lp+ iaa	SPX16	UNKNOWN	SYBR	None	3.47675	1.60254	7.54291	27.2067	27.3081	0.19296		0.4892	0.402451			-1.79774	TRUE	0.313475	TRUE	3	21	1	78.6417				N	N	N	N
H1	5d lp	SPX8	UNKNOWN	SYBR	None				37.2005	36.2037	1.40967		8.70803	1.0029				TRUE	0.0104517	TRUE	3	35	1	79.8006				Y	N	N	N
H2	5d lp	SPX8	UNKNOWN	SYBR	None				35.2069	36.2037	1.40967		8.70803	1.0029				TRUE	0.0104517	TRUE	3	34	1	79.9937				Y	N	N	N
H3	5d lp	SPX8	UNKNOWN	SYBR	None				Undetermined	36.2037	1.40967		8.70803	1.0029				TRUE	0.0104517	TRUE	3	39	1	61.8383				N	Y	Y	N
H4	5d lp+ iaa	SPX8	UNKNOWN	SYBR	None				Undetermined									TRUE	0.0104517	TRUE	3	39	1	62.0314				N	Y	Y	N
H5	5d lp+ iaa	SPX8	UNKNOWN	SYBR	None				Undetermined									TRUE	0.0104517	TRUE	3	39	1	62.0314				N	Y	Y	N
H6	5d lp+ iaa	SPX8	UNKNOWN	SYBR	None				Undetermined									TRUE	0.0104517	TRUE	3	39	1	62.2246				N	Y	Y	N
H7	10d lp	SPX8	UNKNOWN	SYBR	None				Undetermined									TRUE	0.0104517	TRUE	3	39	1	62.0314				N	Y	Y	N
H8	10d lp	SPX8	UNKNOWN	SYBR	None				Undetermined									TRUE	0.0104517	TRUE	3	39	1	61.8383				N	Y	Y	N
H9	10d lp	SPX8	UNKNOWN	SYBR	None				Undetermined									TRUE	0.0104517	TRUE	3	39	1	62.0314				N	Y	Y	N
H10	10d lp+ iaa	SPX8	UNKNOWN	SYBR	None				Undetermined	35.9036			9.08478					TRUE	0.0104517	TRUE	3	39	1	62.0314				N	Y	Y	N
H11	10d lp+ iaa	SPX8	UNKNOWN	SYBR	None				Undetermined	35.9036			9.08478					TRUE	0.0104517	TRUE	3	39	1	62.0314				N	Y	Y	N
H12	10d lp+ iaa	SPX8	UNKNOWN	SYBR	None				35.9036	35.9036			9.08478					TRUE	0.0104517	TRUE	3	34	1	79.6074				N	N	N	N
Analysis Type	Singleplex
Endogenous Control	SPX13
RQ Min/Max Confidence Level	95.0
Reference Sample	0d

## Sheet: Raw Data
Block Type	96alum
Chemistry	SYBR_GREEN
Experiment File Name	D:\ShuJu\LZM\13-16 spx iaa +lp.eds
Experiment Run End Time	2023-08-17 08:06:49 AM CST
Instrument Type	sds7500
Passive Reference	ROX
Well	Cycle	1	2	3	4	5
A1	1	19653.1	3519.86	14851.3	103325	3020.11
A2	1	32174.5	4611.97	16903.9	109074	2958.93
A3	1	27721	5734.02	18427.9	109151	2815.72
A4	1	35956.6	5869.92	18769.5	106252	3158.95
A5	1	31182.1	4816.75	19724.8	110150	3061.68
A6	1	47400.1	8204.04	23623.9	120077	5420.52
A7	1	33339	5273.44	19669	108068	2728.49
A8	1	178417	27966.9	74189.3	385780	15040.3
A9	1	43651.8	6511.27	20963.5	118438	2885.71
A10	1	33486.1	5635.79	22252.6	135292	4018.43
A11	1	33546.3	5193.97	21017.4	139887	3332.4
A12	1	34296	5024.91	17513.1	127767	3802.08
B1	1	36940.4	5786.47	20571.3	137129	4092.25
B2	1	39735.4	6214.05	20242.8	120678	2930.78
B3	1	28288.7	4906.33	20554.4	117813	2236.04
B4	1	31462.1	5653.47	21174.4	116316	3123.02
B5	1	30306.9	4773.1	22660.9	127950	3972.56
B6	1	26228.4	4013.85	20455.6	108880	2359.99
B7	1	28110.3	4423.19	21448.8	113353	2363.8
B8	1	110871	14797.1	67135.1	367894	8542.93
B9	1	34834	5774.42	20711.4	112976	2496.9
B10	1	42771.1	6877.89	25101.3	144576	2882.88
B11	1	44898.7	6910.83	24880.5	153597	4398.21
B12	1	41912.4	7203.87	21319.6	138696	4623.02
C1	1	40971.9	6314.3	21836.4	136681	3987.95
C2	1	40264.2	6466.92	27847.9	169802	4019.86
C3	1	38478.4	5308.11	21710.3	120945	2255.58
C4	1	30742.8	4880.59	21776.8	115929	3035.23
C5	1	31417.2	5274.96	21271.8	107993	3454.5
C6	1	28291.8	4451.38	21453.8	107891	2725.14
C7	1	31711.5	4928.1	23661.4	119130	2388.64
C8	1	34430.6	5233.93	24166.4	122655	2785.42
C9	1	33163.6	6650.23	20704.2	105800	2663.44
C10	1	34652.2	6280.16	25086.3	140311	2687.12
C11	1	35837.6	6776.19	26150.6	157793	2376.71
C12	1	41960.7	6487.6	20565.4	131402	2494.17
D1	1	46277.4	7118.59	23544.9	143733	3472.99
D2	1	33468.1	5226.4	21632.2	125993	2928.29
D3	1	36575.6	6122.64	24465.8	129263	3371.74
D4	1	31857.3	5551.43	24073.5	123461	4151.39
D5	1	34074.7	5458.32	23507	116048	2572.37
D6	1	37812.5	6736.91	24096.2	113611	4157.87
D7	1	27332.4	4528.83	23793.4	118083	2350.58
D8	1	28701.7	5762.59	25583.9	126627	2557.44
D9	1	39638.6	7433.01	22016.4	109865	3836.52
D10	1	43774.7	7965.52	26893.8	140736	4263.24
D11	1	43284.9	8223.98	27525.7	155532	3757.39
D12	1	150584	19317.5	28912.7	142832	7880.06
E1	1	46082.8	6695.25	22354	138408	4171.32
E2	1	43960.6	7024.94	22161.4	123622	3899.48
E3	1	71827.5	8207.17	25226.6	131657	5210.18
E4	1	33950.4	5828.85	25955.5	134395	2967.37
E5	1	28417.3	4981.24	23055.6	116367	2725.35
E6	1	29241.4	5210.46	23358.6	114432	3371.73
E7	1	41791.3	7014.19	25742.5	122889	5676.37
E8	1	37071.5	7008.57	27659.2	135585	4000.03
E9	1	33809.4	7836.25	25646	111238	2601.36
E10	1	36601.2	6488.16	26480.1	144549	3730.3
E11	1	59700.9	11797.7	29089.4	151699	7693.48
E12	1	57276.9	9477.73	22893.4	132717	5573.56
F1	1	54120.3	10157.1	26769.7	159197	9739.99
F2	1	48273	7321.46	22577.8	127583	3616.61
F3	1	31547.2	5181.83	24175.5	135758	3223.71
F4	1	33732.4	5665.28	25035.4	132148	3314.23
F5	1	28691.9	4756.51	23608.6	123050	2445.41
F6	1	55565.7	9810.73	28144.6	128172	5984.17
F7	1	28789.7	4824.72	25070.8	127033	3478.35
F8	1	31050.8	5040.9	25623.3	131712	2741.3
F9	1	29350.5	5014.49	21138.1	112148	3352.12
F10	1	35824.6	6131.4	25935	145142	4047.35
F11	1	31783.7	5130.05	24116.2	145952	2626.69
F12	1	53270.5	9187	22582.4	132054	5804.81
G1	1	44069.1	6949.88	23568.6	155266	4008.2
G2	1	49586.3	7809.31	19987.3	115771	3400
G3	1	38915.3	6277.12	26011.2	147455	2823.24
G4	1	31319	5124.58	23788.7	131465	2919.12
G5	1	27414	4499.33	22744.3	123061	2548.77
G6	1	28534.9	4911.86	22801.7	119564	2506.73
G7	1	29188.4	4893.67	23382.5	123081	2441.72
G8	1	36693.7	6743.59	27623.8	146388	3674.75
G9	1	33968.8	5291.07	22217.6	122282	2452.82
G10	1	38451	7363.11	24836.6	139212	3279.33
G11	1	87751.7	14789.9	29303.4	155026	9307.79
G12	1	41743.9	6390.5	21316.8	140116	3046.76
H1	1	60787.1	9841.91	23736.9	154309	8903.03
H2	1	41306.2	6935.77	21372	134911	3846.73
H3	1	38988.1	6995.79	25065.1	148430	5435.7
H4	1	34800.9	6341.54	24060.1	136342	2910.14
H5	1	31451.1	5853.48	24350.2	137102	2715.87
H6	1	37546.3	6564.25	24671.8	133630	3553.85
H7	1	32839.8	8416.88	26575.7	138818	2734.49
H8	1	37769.3	6952.28	25062.9	138229	2794.89
H9	1	32717.1	5778.02	21045.5	120127	2599.59
H10	1	50138.1	11634.6	27325.5	146544	6117.27
H11	1	39829.5	7216.17	21959.6	137891	3079.22
H12	1	50483.9	7815.51	18994.3	128425	2996.2
A1	2	19658.7	4099.25	14736.6	103098	2894.69
A2	2	32671.5	4979.56	16923.8	108557	2868.97
A3	2	28035.4	5611.81	18555.2	108685	2675.68
A4	2	36053.9	5683.24	18728.4	105601	3052.32
A5	2	31550.8	5189.41	19939.2	110280	3022.39
A6	2	48626.3	8491.68	23547.6	119302	5047.01
A7	2	33160.2	5458.27	19841.3	108299	3334.09
A8	2	178407	27616.8	73271.3	382496	15156.8
A9	2	43753.2	6377.04	20799.6	117512	3175.47
A10	2	33812.6	5970.92	22368	135043	3869.24
A11	2	33894.1	5211.93	21076.4	140732	3427.65
A12	2	34097.2	4870.16	17737	128632	3775.06
B1	2	37287	6041.7	20478.5	135793	3901.08
B2	2	39253.2	6275.01	20071.5	118776	3296.97
B3	2	28532.3	5005.99	20300.7	115706	2559.35
B4	2	31720.7	5531.11	20981.7	115356	3193.11
B5	2	30156.2	4649.2	22538.5	126364	3343.85
B6	2	26295.8	4178.27	20414.3	107977	2132.43
B7	2	27933.7	4700.29	21209.6	111361	2411.73
B8	2	110361	15568.5	65893.8	362287	8686.49
B9	2	34452.8	5683.12	20371	109826	2499.66
B10	2	42580.7	6873.94	24678.2	140842	2603.48
B11	2	44949.9	6748.57	24775.9	151668	4256.19
B12	2	42215.9	7192.35	21296.1	138844	5176.82
C1	2	40974.4	6953.58	21816.8	136375	4005.89
C2	2	40190.4	6119.74	27220.1	166720	3757.88
C3	2	38242.1	5531.3	21444.5	119301	2264.58
C4	2	30686.8	4896.75	21765.7	114990	3273.86
C5	2	31706.4	5079.3	21000.2	106391	3326.11
C6	2	28383.2	4610.87	21273	106827	2522.96
C7	2	31223.9	5078.95	23506.1	117803	2020.08
C8	2	34091.1	5297.12	23751.8	120087	2800.7
C9	2	32963.2	6267.58	20215.8	101965	2692.25
C10	2	34652.2	6528.74	24678.6	137132	2948.67
C11	2	35812.6	6474.49	25713.6	155512	2978.62
C12	2	42185.3	6507.79	20835	131827	2859.28
D1	2	46124	7182.87	23332	143124	3700.94
D2	2	32858.1	5248.28	21200.9	123605	2814.49
D3	2	36116.2	6191.13	24180.3	127498	3459.17
D4	2	31459.9	5669.05	23768.3	122261	3814.08
D5	2	34268.9	5469.66	23139.8	113444	2719.17
D6	2	38603.4	6640.15	23894.2	112315	4370.77
D7	2	27425.5	4503.79	23339.6	114817	2265.85
D8	2	28542.2	5901.43	25012.8	123493	2219
D9	2	39107.1	7253.55	21399.3	107566	4118.68
D10	2	43454.8	7811.72	26329.5	137195	4063.91
D11	2	43351.6	8410.6	27509.2	153896	3757.39
D12	2	150849	19399.4	28871	143568	7805.54
E1	2	46993.1	7147.8	22489.2	138276	4240.54
E2	2	43146	6951.28	21866.2	121840	4098.68
E3	2	71782.9	8177.42	24973.8	130234	5500
E4	2	33811.8	5779.93	25468.6	130544	2947.65
E5	2	28978.2	4866.25	22915.5	114186	2745.2
E6	2	29561.2	4861.59	22765.5	111707	3427.65
E7	2	41846.5	7243.68	25459.9	120955	5484.19
E8	2	36602.4	6873.2	26963.5	131663	4039.38
E9	2	33813.6	7883.82	25517.2	110129	2606.98
E10	2	36511.3	6262.5	25966.4	140867	3828.54
E11	2	57947.9	11607.9	28403.3	147150	7442.09
E12	2	57457.9	9455.16	23007.3	133331	5331.49
F1	2	53774.6	9902.68	26846.9	159215	10039.8
F2	2	47427.7	7511.27	22071.7	125474	3371.35
F3	2	31929.1	5166.62	23729.9	134148	3118.3
F4	2	33920.3	5627.58	24798.6	130055	3284.66
F5	2	28968.9	4750.03	23158.7	119721	2436.93
F6	2	56224.4	10186.3	27750.5	125418	6546.15
F7	2	28770.3	4901.11	24762	125580	3351.39
F8	2	30845.1	5167.63	25364.9	130570	2580.49
F9	2	29599.1	4776.32	20736.7	110339	3240.66
F10	2	35693	6253.78	25434.6	141671	4181.88
F11	2	31736.2	5111.94	23610.5	142160	2793.84
F12	2	53809.2	9290.82	22590.6	132711	5765.92
G1	2	44320.6	7271.16	23494.7	154523	4100.99
G2	2	49106.9	7728.87	19916.5	113752	3479.85
G3	2	38456.9	6520.68	25523.2	144590	3010.99
G4	2	31436.4	5331.15	23479	129846	2863.58
G5	2	27538	4743.23	22410.3	120401	2387.85
G6	2	28291.2	4836.24	22373.5	116494	2379.42
G7	2	29354	4997.72	22775	119665	2637.81
G8	2	36694.5	6834.49	26977.2	142748	3753.6
G9	2	33878.1	5414.48	21657.8	118609	2682.33
G10	2	38473	7399.83	24624.3	137215	2997.27
G11	2	86827.1	14696.4	29081.2	151593	8972.18
G12	2	41977.9	6449.96	21462.6	140848	2934.97
H1	2	61238.2	10213.9	24072.6	153875	8298.54
H2	2	41310.2	7111.65	21211.7	134173	3474.39
H3	2	38555.7	6766.12	24993.3	147775	5028.48
H4	2	35184.2	6490.8	24301.2	136186	2870.35
H5	2	31744	5830.11	24365	137170	2847.99
H6	2	37626.5	6376.77	24891.6	133519	3875.05
H7	2	33021.7	8606.42	26734.4	137848	2766.24
H8	2	38139.3	6847.4	25021.3	138040	2817.75
H9	2	32830.6	5812.19	20954.9	119589	2874.33
H10	2	50017.2	11952.9	27408.6	145991	6184.99
H11	2	39863.3	7450.69	22124.8	139198	3170.58
H12	2	51604.4	7936.91	19339.1	128973	3066.8
A1	3	19799.6	3920.07	14907.9	103667	2913.43
A2	3	32615	4804.67	16954.4	108083	2766.56
A3	3	28056.6	5452.65	18267.9	107931	2436.87
A4	3	36047.5	5413.6	18675.9	105081	3133.61
A5	3	31663.6	4928.96	19645	109595	3064.63
A6	3	48549.2	8555.25	23328.5	118412	5291.83
A7	3	33525.4	5326.38	19772.8	106777	2992.08
A8	3	179164	27892.9	73265.5	379575	15619.6
A9	3	43711.7	6461.45	20579.7	115900	2961.86
A10	3	33695.9	6129.96	22294.1	134653	3786.35
A11	3	33836.9	5147.28	21026.7	141016	3738.93
A12	3	34452.8	5030.86	17835.7	128636	2967.44
B1	3	36900.9	6191.25	20403.9	135489	3523.83
B2	3	39364.7	6090.63	19632.7	117480	3208.36
B3	3	28254.5	4594.57	20189.6	114941	2068.49
B4	3	31678.6	5932.18	20740.8	114402	3031.35
B5	3	30559	4653.51	22374.8	125586	3463.32
B6	3	26079.6	4054.5	20187.5	106929	2135.15
B7	3	28352	4450.29	20936.1	110365	2280.36
B8	3	110335	14611	65359	358752	7681.62
B9	3	34436.5	5675.82	20125.9	108405	2604.66
B10	3	42475.9	6736.66	24233.3	138348	2746.63
B11	3	44673.5	7099.94	24705.8	151074	4021.79
B12	3	42735.3	7319.06	21164.9	138230	4700.33
C1	3	41283.6	6692.22	21807.6	136013	3824.21
C2	3	40516.4	5998.92	26629.4	164950	3985.84
C3	3	38638.3	5199.4	21398.1	118207	2375.96
C4	3	30996.7	4701.7	21755.8	114155	2995.28
C5	3	32033.2	4819.41	20920.7	105823	3037.24
C6	3	28882.8	4683.13	21081.7	105877	2365.71
C7	3	31350.5	4920.16	23292.4	116713	2312.78
C8	3	34001.6	5227.87	23382.6	118344	2521.16
C9	3	32257.6	6557.18	20129	101666	2388.91
C10	3	34505.9	6302.67	24445.7	134872	2599.6
C11	3	36704.8	7046.19	25474.9	154371	2829.52
C12	3	42065.9	6351.01	20485.9	130831	2641.16
D1	3	46132.8	7413.62	23292	141988	3319.11
D2	3	33492.4	5077.8	21353.3	123121	2493.86
D3	3	36591.8	6486.15	24013.2	126843	3826.78
D4	3	31949.7	5620.98	23694.1	121195	4237.04
D5	3	34389.4	5699.26	22979.5	112823	2411.6
D6	3	39054	6774.92	23896	111483	4304.35
D7	3	27626.3	4561.64	23110.4	113316	2307.76
D8	3	28620.3	5953.61	24804.1	122033	2145.34
D9	3	38343.8	7191.67	21149.7	105949	3744.69
D10	3	43033	7969.27	25991.3	135930	3967.15
D11	3	43239.4	8302.77	27347.4	152921	3914.81
D12	3	150260	19349.7	28712.1	142310	7690.27
E1	3	46515.1	6730.85	22299.4	137445	4452.41
E2	3	42690	6786.62	21745	121028	3999.6
E3	3	71301.4	8250.85	24848.8	129364	5308.98
E4	3	34085.9	5835.07	25160.6	129432	3054.7
E5	3	28933.7	4859.17	22666.6	113165	2724.4
E6	3	29756.3	5137.06	22733.7	109893	3455.16
E7	3	41726.4	7054.37	25293.2	120231	5651.75
E8	3	36771.3	6902.99	26722.2	130208	3980.84
E9	3	33537.6	7893.51	25020.1	109166	2701.42
E10	3	36209.9	6373.55	25553.9	139049	3700.92
E11	3	57130.1	11325.6	27847.4	145209	7279.6
E12	3	57319.1	9540.42	22958.5	132670	5537.91
F1	3	54368.2	10038.5	26892.7	158605	10043.6
F2	3	46923	7336.15	21945.5	124555	3622.74
F3	3	31470.7	5243.56	23756.5	133670	2854.31
F4	3	33971.9	5516.15	24645.2	129346	3285.53
F5	3	28808.9	4822.1	23004	118348	2531.9
F6	3	56712.7	10338.9	27626.7	124262	6677.68
F7	3	28984.6	4893.31	24673.3	124555	3513.81
F8	3	30955.3	5295.14	25268	129408	2273.7
F9	3	29390.4	4831.03	20541.4	109487	3129.21
F10	3	35578.9	6269.93	25425.2	140784	4442.22
F11	3	31529.3	5116.97	23292.8	140970	2760.01
F12	3	53996.1	9343.15	22584.8	131385	5756.81
G1	3	44428.8	7221.84	23445.4	153900	4151.26
G2	3	48507.2	7643.71	19610.5	113254	3251.22
G3	3	38477.6	6390.72	25357.9	143319	3158.88
G4	3	31286.9	5192.36	23545.6	129283	3012.23
G5	3	27487.8	4559.72	22216.4	119287	2682.09
G6	3	28350.4	4724.6	22070.7	115041	2347.41
G7	3	29387.3	5194.53	22483.1	117917	2782.14
G8	3	36494.8	6782.08	26795	140384	3842.63
G9	3	33475.6	5416.19	21490.1	117824	2471.21
G10	3	38495.8	7373.86	24661.9	136407	3031.16
G11	3	86045.1	14435.1	28815.5	150354	8832.7
G12	3	42169.2	6656.22	21255.3	139272	3046.76
H1	3	61261.3	9955.81	24014.3	153943	8453.54
H2	3	41247.1	6856.76	21224.6	133754	3722.23
H3	3	38943.9	6779.18	24986.1	147384	5332.08
H4	3	35192.3	6514.72	24193.4	135882	2805.39
H5	3	31985	5966.57	24292.5	136348	2696.36
H6	3	37744.9	6494.14	24648.5	132696	3570.68
H7	3	33466.5	8922.58	26809.1	137231	2694.8
H8	3	38323.2	6981.65	24889.3	137285	2969.25
H9	3	32945.8	5872.65	20908.3	119035	2633.71
H10	3	50474.4	12016.4	27296.2	145108	5865.29
H11	3	40147.9	7551.85	22055.9	139350	2858.15
H12	3	51455.7	7939.87	19124.6	128734	3301.19
A1	4	19711.3	4062.41	14547.9	104168	2805.31
A2	4	32451.2	4791.72	16732.3	107121	3001.83
A3	4	28193.4	5080.33	18183.1	107236	2429.37
A4	4	36134.6	5652.13	18711.3	105171	3191.68
A5	4	31546.3	5100.88	19515.5	108704	3176.61
A6	4	48233.3	8473.96	23464.9	117441	4987.38
A7	4	33159.1	5488.11	19782.6	106024	2705.82
A8	4	177211	28578.7	72286.3	376083	14856.4
A9	4	43654.1	6381.11	20530.8	114922	3008.34
A10	4	33996.2	6069.75	21805.9	133754	4092.48
A11	4	34296.3	5416.68	21027.8	140436	3579.8
A12	4	34939.9	5138	17585.4	128349	3692.6
B1	4	37929.9	6041.7	20463.9	135627	3945.07
B2	4	39089.2	6233.38	19634.1	117630	3204.45
B3	4	28184.7	4708.29	19982.5	114514	2698.59
B4	4	31848.3	5940.11	20841.8	113811	3000.08
B5	4	30443.4	4831.29	22145.3	124409	3434.35
B6	4	26064.9	4385.15	20115.3	106296	2178.67
B7	4	28034.2	4570.05	20831	109652	2156.09
B8	4	108439	14640.7	65494.1	356291	9447.01
B9	4	34051.5	5611.91	19970.7	108103	2610.18
B10	4	42259.9	6800.85	24180.6	138178	2904.6
B11	4	44885.9	6920.17	24631.1	150014	4144.18
B12	4	42420.4	7320.5	21207.7	137830	4687.68
C1	4	40846.7	6668.91	21584.1	135034	3800.66
C2	4	39946.8	6014.23	26888.4	164204	4069.2
C3	4	38706.7	5507.02	21002.3	117855	2360.21
C4	4	30892	4945.24	21697	114234	3041.71
C5	4	31750.8	4990.36	20903.1	105091	3128.51
C6	4	28427.3	4625.82	21034.6	104927	2666.39
C7	4	31664.5	5019.4	23178.8	116381	2213.02
C8	4	34028	5259.03	23186.7	118105	2731.49
C9	4	31946	6589.35	19750	100796	2536.53
C10	4	34327	6317.35	24156.9	134137	3098.84
C11	4	36977.2	7412.38	25392.1	153450	2811.85
C12	4	42153.2	6125.33	20491.6	129720	2930.41
D1	4	46034.6	7522.15	23037.2	141365	3309.49
D2	4	33286	5245.98	21095.6	122741	2423.83
D3	4	36373.3	6422.93	24043.9	126577	3719.34
D4	4	31622.5	5572.91	23660.2	121312	3719.97
D5	4	34310.3	5529.19	22500.8	112087	2365.66
D6	4	39071.7	6705.81	23691.2	111379	4536.36
D7	4	27386.2	4508.97	22939.6	112729	2217.56
D8	4	28827.1	6094.23	24595.5	121004	2365.38
D9	4	38080.4	7186.36	21102.4	104987	3700.69
D10	4	43288.9	8062.11	25970.2	135555	4125.84
D11	4	42917.6	8591.01	27139.2	152524	3480.07
D12	4	149294	19506.7	28527.6	141777	7454.76
E1	4	46655.6	6780.24	22278.7	136892	4226.91
E2	4	42539.8	6915.53	21437.2	120453	3680.46
E3	4	70919.7	8093.77	24674.4	129059	4991.87
E4	4	34035.3	5890.22	24983.7	129495	3362.71
E5	4	29106.3	5026.36	22387.2	112522	2986.34
E6	4	29261	4960.9	22438.1	109420	3427.65
E7	4	41513.8	6996.33	25274.4	119771	5417.92
E8	4	36812.9	6856.06	26786.3	129740	4293.7
E9	4	33450.3	7676.82	24882.2	108595	2673.36
E10	4	36113.8	6429.52	25591.8	138806	3593.5
E11	4	56825.9	11125.1	27848.3	144702	6752.94
E12	4	57269.1	9490.27	22803	131861	5581.02
F1	4	54825.3	9716.86	26699.1	157746	9893.1
F2	4	46673.3	7213.46	21817.2	124279	3606.39
F3	4	31663.8	5321.4	23604.2	133088	2828.18
F4	4	33840.3	5558.88	24491.8	129040	3367.28
F5	4	28959.8	4786.47	22831	117833	2356.38
F6	4	57065.2	10283	27448.3	123237	6567.68
F7	4	29277.4	4934.62	24520.1	123854	3415.7
F8	4	31058.1	5169.98	25074.2	128829	2520.28
F9	4	29284.2	4829.43	20428	108581	3237.26
F10	4	35565.5	5980.96	25074.8	140261	4019.4
F11	4	31027.7	5067.68	23329.4	140227	2343.12
F12	4	54083.1	9488.15	22566	131026	5746.88
G1	4	44806	6882.24	23287.1	153165	3997.89
G2	4	48178.1	7743.07	19481.2	112455	3270.91
G3	4	38143.2	6490.69	25295.1	142624	2904.72
G4	4	31520.1	5074.56	23222.3	128798	2570.36
G5	4	27425.8	4677.41	21970.4	118418	2782.27
G6	4	28351.1	4787.26	22050.2	114638	2301.25
G7	4	29748.9	5118.37	22258.6	117271	2397.01
G8	4	36384.3	6850.05	26477.2	139700	3981.69
G9	4	33558.6	5395.62	21405	117231	2193.52
G10	4	38386.9	7446.4	24606.4	135771	2976.21
G11	4	85325.6	14410.3	28719.7	149751	8748.8
G12	4	42365.8	6857.63	21277	138974	3427.74
H1	4	61828.1	9776.06	24100.9	153488	8317.14
H2	4	41041.7	7135.87	21212.9	133443	3810.99
H3	4	38954.6	6872.79	24824.9	147010	4872.02
H4	4	35284.7	6717.58	24139.1	135088	2805.39
H5	4	31946.3	5786.38	24137.8	135533	2806.7
H6	4	37734.4	6649.61	24481.2	131819	3902.59
H7	4	33592.3	8891.91	26481.6	135543	2756.71
H8	4	38258.3	7022.21	24717.1	135916	3074.3
H9	4	33206.6	5867.4	20735.9	118406	2701.96
H10	4	50136	12169.5	27256.2	144082	6235.79
H11	4	40496.6	7478.28	22132.5	139217	3072.45
H12	4	51592.8	8120.49	19305.2	128478	3401.44
A1	5	19827.8	3724.15	14755.4	103032	2649.62
A2	5	32867.3	4709.13	16453.4	106588	2762.4
A3	5	28283	5840.6	18314.4	106923	2380.61
A4	5	35960.5	5769.67	18632.5	104223	3094.55
A5	5	31300.5	5008.23	19458.5	108163	3046.95
A6	5	48239.9	8511.48	23289.8	116960	5181.98
A7	5	33453.6	5168.51	19391.9	105348	2984.53
A8	5	177177	27172.8	72038.6	373529	13127.7
A9	5	43674.9	6402.47	20268.2	114379	3276.34
A10	5	33446.7	5962.97	21705.1	133176	4068.17
A11	5	33995.8	5276.59	21143.5	140342	3526.37
A12	5	34748.3	4959.44	17734.2	127634	3503.49
B1	5	37155.4	5910.1	20458.5	134346	3794.51
B2	5	38682.5	6136.73	19775.7	117293	3500.26
B3	5	28298.3	4957.44	20016.6	114189	2599.47
B4	5	31250.2	6013.75	20725.9	113832	3243.8
B5	5	29775.3	4822.67	22077	124000	3598.47
B6	5	26625.6	4040.95	19938.1	105675	2181.39
B7	5	27816.9	4398.71	20737.7	109349	2217.33
B8	5	108633	15522.7	64796	355171	8610.13
B9	5	34252.6	5793.59	20010.9	108287	2489.53
B10	5	42058.8	6800.85	23928.4	137456	2766.38
B11	5	44177.1	7154.81	24526.5	150257	3901.7
B12	5	42626.5	7281.62	21232.6	137610	4922.41
C1	5	41013.2	6637.01	21478.2	134300	4197.66
C2	5	40322.5	5874.68	27201.5	164040	3662.62
C3	5	38931.5	5538.24	21063.8	117610	2345.58
C4	5	31165.9	4948.48	21609.5	113529	3020.12
C5	5	32014.9	5242.35	20689.4	104301	3480.58
C6	5	28657.4	4820.19	20993.5	104988	2674.16
C7	5	31824.2	4866.96	22986.7	115951	2243.52
C8	5	33923.9	5247.78	23005.2	117345	2572.4
C9	5	32068.3	6558.92	19873.9	100387	2658.04
C10	5	34238	6107.91	23912.1	133136	2828.34
C11	5	37200.8	7289.95	25308.2	152740	2476.11
C12	5	41924.7	6543.42	20367.2	128968	2903.14
D1	5	45549	7061.7	22895.2	140900	3515.31
D2	5	33155	5516.69	21043	122445	2537.64
D3	5	36375.4	6580.97	24015.3	126395	3631.92
D4	5	31693.7	5635.3	23558.5	120652	4224.35
D5	5	34610	5411.08	22678.9	111443	2804.05
D6	5	39339	6760.24	23837.5	110920	4519.07
D7	5	27631.1	4479.61	22921.3	112688	2512.75
D8	5	28319.6	6310.9	24566.6	120431	2391.49
D9	5	37728.2	7149.23	21020.7	104486	3811.65
D10	5	42776.1	7926.13	25994.2	135149	3985.54
D11	5	42900.7	8288.26	27011.5	151974	3751.13
D12	5	148504	19420.9	28454.8	140977	7854.23
E1	5	46084	6854.9	22212.2	136883	4042.31
E2	5	42687.9	7043.36	21584.8	120512	4085.12
E3	5	70874.2	7863.27	24754.6	128535	5256.29
E4	5	33663.3	5750.57	24958.9	129884	3030.29
E5	5	29100.6	4937.01	22405.7	111952	3112.11
E6	5	29417.7	4943.63	22378	109286	3298.39
E7	5	41522	7040.97	25060.6	119678	5610.1
E8	5	36313	6627.73	26515.7	129489	4093.12
E9	5	33553.4	7700.6	24847.8	108418	2845.42
E10	5	36154	6132.79	25292.1	138162	3518.21
E11	5	56440.5	10831.2	27561.3	144070	6997.63
E12	5	56918.4	9296.33	22589.1	131356	5457.5
F1	5	54167.8	9711.14	26627.1	157049	9923.72
F2	5	46486.3	7263.79	21859.6	123946	3324.34
F3	5	31845.6	5286.5	23379.2	132709	2717.36
F4	5	33833.1	5599.1	24441.6	129302	3300.32
F5	5	29079.1	4736.26	22770.3	117902	2627.71
F6	5	57433.7	10410.7	27527	123292	6729.5
F7	5	29058	5050.76	24371.8	123161	3618.51
F8	5	31274.8	5161.37	24827.9	127837	2704.19
F9	5	29313.6	4827.82	20277.4	108132	2930.12
F10	5	35295.6	6120.35	25090.2	139818	4194.12
F11	5	31407.2	5034.47	23033.5	139378	2461.52
F12	5	54082.2	9257.36	22335.9	130354	5721.23
G1	5	44167.1	7014.7	23232.6	152312	4353.6
G2	5	48097	7627.15	19359.7	112307	3398.9
G3	5	37954.4	6270.75	25278.3	142285	3135.85
G4	5	31582.8	5313.4	23254.4	128212	2451.93
G5	5	27510.7	4596.11	21967.3	117747	2651.32
G6	5	28200.6	4862.16	21938.7	114447	2517.15
G7	5	29513.3	5131.19	22264	116975	2628.4
G8	5	36107.1	7019.56	26365.7	139546	3676.45
G9	5	33437.4	5228.51	21264.8	117025	2266.23
G10	5	38292.1	7547.59	24336.7	135242	2934.09
G11	5	84466	14164.8	28642.4	149792	8908.98
G12	5	41987.3	6551.87	21113	137958	3015.96
H1	5	60843	10162.3	23918.2	153150	8101.69
H2	5	41417.6	7115.48	21059.6	132865	3591.97
H3	5	38659.2	6966.4	24895.8	146302	5127.96
H4	5	35437.1	6621.1	24052.9	134509	2794.02
H5	5	31737.3	5554.93	23989.7	134593	2675.34
H6	5	37769.6	6453.74	24356.6	130680	3730.51
H7	5	33734.6	8922.58	26350.9	135149	2813.07
H8	5	38565.3	6973.96	24621.3	134976	2993.55
H9	5	32969.2	5836.73	20789.3	117914	2920.71
H10	5	49845.5	12027.5	27186.8	143367	5965.88
H11	5	40333.7	7664.52	22297.8	139184	2996.88
H12	5	51806	8142.69	19371.7	128458	3192.46
A1	6	20387.7	3754.3	14540.1	102882	2871.63
A2	6	32091.7	5003.85	16638.8	106441	2754.1
A3	6	28071.3	5492.44	18112	106727	2263.08
A4	6	35904.2	5744.32	18545.8	104302	3200.13
A5	6	31112.2	5210	19136.3	107750	3028.29
A6	6	47937.2	8564.63	23095.3	116349	5155.82
A7	6	33152.7	5299.43	19394.8	104981	2795.57
A8	6	176025	27491.6	70989.4	371064	14743
A9	6	43494.1	6310.94	20313	113421	2825.38
A10	6	33667.1	5949.34	21866.4	132807	3790.77
A11	6	34711.4	5233.49	21089.1	140485	3468.3
A12	6	35023.8	4937.12	17657.7	126776	3931.47
B1	6	37291.4	5977.89	20227.3	133460	3684.54
B2	6	39190.9	6089.14	19658.2	117735	2899.51
B3	6	28381.8	4547.3	19921.9	113223	2349.32
B4	6	31706.7	5920.85	20636.5	113521	2707.84
B5	6	30235.4	4734.32	21902.8	123086	3605.71
B6	6	26512.9	4222.54	20077.8	105447	2169.6
B7	6	27788.8	4490.5	20674.3	109181	2424.16
B8	6	108539	14689.2	64793.2	353752	8903.34
B9	6	34179.8	5543.44	19822.9	107728	2447.16
B10	6	41838.5	6934.19	23784.4	137238	2868.07
B11	6	44255.1	6820.94	24404.7	149198	3919.02
B12	6	42323	7218.27	21310	137121	5311.76
C1	6	40777.8	6731.49	21396.4	134270	3686.27
C2	6	39940	6084.01	26910.4	164183	4133.84
C3	6	38895.5	5574.09	21103.3	117246	2189.21
C4	6	31174.4	5170.47	21461.1	113252	2894.86
C5	6	31824	5166.26	20490.1	104022	3344.17
C6	6	28886.8	4458.86	20951.6	104624	2495.31
C7	6	31210.1	5098.8	22965.9	115633	2075.32
C8	6	33516.2	5230.46	23044.2	116769	2571.5
C9	6	32147.2	6521.52	19834.2	100251	2681.45
C10	6	33952.3	6204.8	23994	132683	3131.66
C11	6	36763.8	7319.46	25116.4	152372	2809.64
C12	6	41492.1	6687.15	20361.4	127962	2827.27
D1	6	45668.2	7245.04	23054.1	140026	3389.32
D2	6	32879	5136.54	20976.9	122230	2776.19
D3	6	36269.7	6295.44	23982.5	125697	3550.81
D4	6	31778.4	5840.87	23774.7	120113	3856.37
D5	6	34381.5	5592.49	22562.5	110741	2655.26
D6	6	39424.7	6942.53	23769.8	110686	4656.45
D7	6	27699.4	4559.05	22774.3	112359	2252.18
D8	6	28332	6187.97	24534.9	120449	2482.86
D9	6	37267.6	7132.43	20913.1	104277	3738.95
D10	6	42290.3	7863.3	25769	134872	4402.57
D11	6	42742	8444.82	27107.3	151663	3667.73
D12	6	146485	19026	28221.2	139847	7559.1
E1	6	46279.7	6951.39	22120.6	135957	4275.15
E2	6	42257.3	6677.21	21511	119955	3781.63
E3	6	70416.8	8052.88	24613.8	128156	5409.67
E4	6	33846.8	5800.38	24821.4	128646	2973.94
E5	6	29123.3	5069.71	22324.6	111467	2910.69
E6	6	29215.5	4972.12	22440.8	108932	3507.41
E7	6	41463.6	7004.36	25028.6	119045	5537.2
E8	6	36372	6676.47	26562.9	129052	4251.47
E9	6	33542.5	7490.07	24695.4	107652	2474.2
E10	6	36011.6	6450.85	25319.1	137855	3746.82
E11	6	55942.6	10946.8	27499.1	143595	6876.24
E12	6	56889.9	9429.25	22634.6	130564	5550.35
F1	6	54610.1	9872.66	26623.2	156766	9447.82
F2	6	46006.7	7413.74	21853.6	123485	3260.98
F3	6	31819.5	4968.01	23405.7	132719	2840.8
F4	6	33691.2	5553.02	24454.3	128718	2940.28
F5	6	29048.9	4690.92	22750.4	117565	2291.94
F6	6	57597.9	10502.2	27470.9	122946	6847.48
F7	6	29145	5056.21	24285.5	122920	3488.25
F8	6	31188.9	5241.94	24904.6	127736	2802.33
F9	6	29547.9	5001.62	20338.6	107743	3165.79
F10	6	35452.3	6071.05	24922.3	139588	4202.85
F11	6	31405.2	4842.31	23206.7	138842	2603.8
F12	6	54183.9	9232.48	22271.2	129668	5649.24
G1	6	44392.2	6790.65	23187.2	151380	3826.48
G2	6	47798.9	7398.85	19439.2	111879	3001.8
G3	6	37891.5	6432.52	25059.1	141550	3092.46
G4	6	31473.2	5189.14	23248.8	127924	2857.05
G5	6	27560.1	4580.63	21774.2	117098	2679.72
G6	6	28233.9	4858.56	21832.4	114151	2637.76
G7	6	29459.5	5098.01	22234.1	116437	2618.2
G8	6	36303.7	6963.06	26418.1	138960	3683.23
G9	6	33452.7	5117.1	21181.4	116648	2584.22
G10	6	38283.3	7520.73	24463.9	134765	3172.18
G11	6	84058.2	14332.6	28444.2	149324	9002.69
G12	6	41983.3	6600.41	21149.4	137399	3240.67
H1	6	60929.7	10418.5	23779.5	152342	8455.09
H2	6	41026.9	6785.38	21167.3	132785	3370.64
H3	6	38529.8	6818.36	24765.4	146174	5127.96
H4	6	35323.6	6665.63	24003.5	134155	3079.84
H5	6	31907.6	5903.99	23826.9	133403	2598.77
H6	6	37490.8	6526.15	24388.9	130044	3728.98
H7	6	33646.2	8909.21	26345.4	134057	2785.29
H8	6	38083.1	7064.86	24497.7	134262	2957.82
H9	6	32908.6	5895.44	20723.8	117110	2652.09
H10	6	49457.3	12178.6	26994.3	142755	6014.68
H11	6	40847.6	7727.75	22314.2	139276	3242.77
H12	6	52419.1	8389.94	19382.6	127815	3066.8
A1	7	20167.9	3717.46	14620.2	102398	2868.74
A2	7	31703.9	4994.14	16379.9	106084	3235.72
A3	7	28230.9	5510.91	18096.9	106226	2595.66
A4	7	35809.4	5763.9	18501.3	104160	3157.9
A5	7	31206.9	4977.34	19230.6	107233	2991.94
A6	7	48029.7	8423.94	22890.1	115690	5084.68
A7	7	32882.8	5099.19	19120.7	104080	3075.22
A8	7	174002	27414.7	70855.4	367226	14470.2
A9	7	43055.4	6521.44	20183.7	113009	2861.97
A10	7	33865.1	6189.04	21771.2	131880	3960.97
A11	7	34118.8	5404.7	21032.4	140009	3507.79
A12	7	34171.9	4963.9	17649.4	126230	3674.11
B1	7	36574	5567.14	20187.3	133497	3826.65
B2	7	39095.8	5828.92	19605.8	117286	2863.02
B3	7	28327	4213.82	19774.2	113522	2197.1
B4	7	31671.6	5739.58	20542.4	112964	2990.38
B5	7	30181.5	4872.23	21945.2	122961	3756.55
B6	7	26541.5	4145.75	19845.3	105351	1893.07
B7	7	28276.9	4516.72	20475.9	108412	2201.36
B8	7	108097	15285.3	63974.1	352277	8472.68
B9	7	34238.2	5641.12	20021.2	107628	2593.61
B10	7	41795.8	6765.3	23856.9	136555	2898.67
B11	7	44192.4	6881.65	24533.4	148959	4072.59
B12	7	42170.5	7329.14	20949.3	136161	5005.34
C1	7	40636.3	6654.18	21390.6	133994	3961.03
C2	7	40219.6	5871.28	26769.9	163434	4412.83
C3	7	38926.8	5634.22	20827.1	116864	2525.58
C4	7	30861.3	4703.85	21331.5	113050	3093.54
C5	7	31676.5	5272.99	20505.6	103515	3148.57
C6	7	28854.7	4571.83	20725.4	103913	2652.56
C7	7	30979.4	4935.24	22870.7	115343	2091.81
C8	7	33709.9	4898.04	22774.8	116383	2357.58
C9	7	31966.4	6593.7	19719.3	100002	2719.25
C10	7	34239	6287.01	23721.2	131769	2429.54
C11	7	36713.8	7390.52	24999.8	151993	2618.58
C12	7	40997.8	6383.08	19990.4	127107	2625.75
D1	7	45233.4	7141.78	22814.3	139441	3578.79
D2	7	32832.6	5098.53	20961.2	122431	2829.81
D3	7	35833.7	6468.23	23816.5	125790	3759.37
D4	7	31658.1	5732.46	23524.6	120209	4005.47
D5	7	34259.3	5650.12	22360.4	110217	2830.01
D6	7	39261.4	6756.78	23539.5	110474	4788.38
D7	7	27511.5	4628.12	22946	112414	2352.4
D8	7	28551.3	6161.44	24584.3	119942	2518.29
D9	7	37159.3	7230.56	20813.8	103678	3888.17
D10	7	42664	7954.27	25712.5	134404	3926.51
D11	7	42751.5	8436.52	26987.8	150981	3662.51
D12	7	145305	19024	27871.1	139150	7565.06
E1	7	46290.5	6817	22158.7	135376	4355.92
E2	7	42204.4	7060.69	21397.1	119624	3657.52
E3	7	70326.7	7831.66	24566.2	127914	5050.21
E4	7	33526.2	5797.72	25027.7	128712	3019.96
E5	7	29239.2	5204.17	22277.5	110765	2706.43
E6	7	28979.6	4934.99	22156.1	108978	3670.59
E7	7	41299.7	7122.23	25094.5	118959	5523
E8	7	36192.4	6494.17	26477.1	128730	3964.52
E9	7	33444.4	7511.21	24561.1	107279	2615.39
E10	7	36183.7	6289.15	25255	137446	3596.25
E11	7	55258.8	10832.2	27253.2	143441	6765.36
E12	7	56318.5	9207.72	22462.1	130139	5173.97
F1	7	54129.2	10072.8	26444	156542	9492.47
F2	7	45895.9	7222.89	21685.9	123162	3700.41
F3	7	31554.2	5112.94	23383.6	132389	3064.24
F4	7	33679.3	5691.26	24334.2	128621	3315.1
F5	7	28957.5	4611.56	22593.2	117069	2375.88
F6	7	57775.2	10542.2	27369.7	122664	6876.97
F7	7	29044.3	4982.95	24217.8	122625	3711.67
F8	7	31329.2	5221.61	24892.5	127476	2436.16
F9	7	29383.7	4926.79	20254.2	107219	3095.18
F10	7	35135.4	5916.36	24885.4	139090	4520.84
F11	7	31269.7	4923.8	23142.4	138473	2706.28
F12	7	53681.9	9387.77	22155.7	128501	5600.42
G1	7	43810.3	6680.73	22987.4	150837	3738.84
G2	7	47537.8	7594.03	19414.9	111864	3503.92
G3	7	37742.3	6348.91	24960.1	141233	3044.64
G4	7	31522.5	5168.96	23148.5	127639	2772.92
G5	7	27678.9	4892.66	21771.9	116746	2755.45
G6	7	28405.7	4832.64	21867.6	113554	2302.74
G7	7	29609.5	5255.6	22013.5	115858	2375.05
G8	7	35944.3	6782.08	26372.3	138494	4017.3
G9	7	33432.3	5334.78	21155.6	116745	2490.49
G10	7	38413.3	7244.01	24272.2	134382	2858.99
G11	7	83682.8	14145.7	28222	149325	8543.95
G12	7	42328.3	6833.36	20928.5	136223	3307.97
H1	7	60783.2	10007.4	23859.9	151315	8521.74
H2	7	40433.6	6733.13	21187.2	132387	3701.48
H3	7	38488.9	7089.4	24769.5	145325	4947.66
H4	7	35349.6	6641.72	24018.6	133208	3087.15
H5	7	31542.5	5869.31	23643.3	132349	2665.58
H6	7	37557.5	6369.91	24250.1	128999	3676.22
H7	7	33445.6	8930.45	26182.8	133218	2768.62
H8	7	38340.1	7041.78	24237.3	133365	2911.37
H9	7	32677.3	5918.22	20660	116701	2547.96
H10	7	49637.2	12258.2	26855.6	142038	5889.19
H11	7	40637.7	7753.04	22228.8	138796	3029.59
H12	7	52353	8333.68	19369	127498	3405.67
A1	8	20092.7	3814.58	14420.6	101994	2711.61
A2	8	31927.9	4679.98	16188.4	105542	2604.63
A3	8	27608.6	5226.7	18170.8	105732	2240.57
A4	8	36065.4	5558.79	18585.7	103411	3351.11
A5	8	30843.8	4850.72	19335.2	107183	3342.61
A6	8	47640.1	8407.27	22799.8	115223	4796.96
A7	8	32755.3	5490.03	19054.1	103802	2808.8
A8	8	171915	27326.5	70281.3	366571	14071.7
A9	8	42860.8	6666.86	20002.5	112948	2964.82
A10	8	33846.7	6044.76	21793.6	131814	3944.39
A11	8	34071.6	5290.96	20992	140321	3314.98
A12	8	34409.1	4974.32	17492.2	125845	3271.72
B1	8	37142.2	5856.26	20431.2	133114	3621.95
B2	8	39095.8	6208.1	19488.3	116942	3433.8
B3	8	27913.7	4515.36	19716.2	113464	2324.54
B4	8	31538.1	5735.04	20422	113197	2961.26
B5	8	29861.2	4501.59	21726.2	122640	3720.35
B6	8	26680.1	4122.26	19885.6	105206	2337.33
B7	8	28059.6	4490.5	20401.6	108381	2528.01
B8	8	107832	14902.3	63850.2	350889	9447.01
B9	8	34093.6	5417.45	19755.6	107488	2594.53
B10	8	41507	6601.35	23805.2	136353	2580.77
B11	8	44552	6830.28	24385.2	148388	3985.99
B12	8	41990.3	7297.46	20873.3	136573	4909.76
C1	8	40397.1	6433.32	21480.5	133843	3804.03
C2	8	40526.7	5694.29	26697.1	163564	4348.19
C3	8	38981.3	5618.03	20933.8	116759	2427.71
C4	8	30926.9	4958.18	21383.5	112869	3171.28
C5	8	31672.7	5159.35	20331.1	103391	3025.2
C6	8	28783.3	4708.88	20711.4	103834	2605.91
C7	8	30637.6	5050.37	22934.1	115029	1951.64
C8	8	33965.7	5161.21	22844.7	116053	2745.87
C9	8	31616.6	6400.64	19652.4	99450.5	2548.23
C10	8	33917.7	6262.54	23600.3	131417	2365.9
C11	8	36809.2	7422.22	25140.4	151468	2386.65
C12	8	41240.5	6402.08	20048	126823	2835.57
D1	8	45509.3	7431.53	22840.3	139667	3463.38
D2	8	32811.7	5361.18	21249.1	122326	2675.51
D3	8	36151.8	6071.02	23856.7	125716	3126.31
D4	8	31563.8	5528.93	23409	120046	3623.74
D5	8	34201.2	5669.02	22258.9	110357	2520.45
D6	8	39387.1	7130	23559.6	110076	4498.15
D7	8	27687.3	4331.96	22746	112123	2563.77
D8	8	28827.1	6246.34	24518.1	119887	2520.15
D9	8	36661.4	7078.51	20636.6	103642	3724.61
D10	8	42573.1	7949.58	25749.8	134443	4060.04
D11	8	42867.9	8606.56	26844.5	150443	3543.66
D12	8	144129	18771.5	27630.9	138879	7552.14
E1	8	46132	6905.44	21947.1	135332	4243.69
E2	8	42156.8	7112.69	21308.6	119745	3701.32
E3	8	70110.9	7971.08	24394.6	127936	5191.36
E4	8	33495.2	5686.53	24773.7	128698	3152.36
E5	8	29382.7	4935.24	22180.8	110876	2782.08
E6	8	28833.8	4848.64	22197	108862	3533.99
E7	8	41224.2	7090.98	24974.9	118594	5300.53
E8	8	36243.1	6784.76	26435.6	128458	4054.73
E9	8	33219.2	7554.38	24501.3	107033	2580.79
E10	8	36223.9	6358.45	25152.1	137279	3577.89
E11	8	55259.7	10702.1	27090.5	142798	6677.43
E12	8	56172.8	9384.11	22525.6	130129	5329
F1	8	53663.2	9513.89	26381.2	156094	9719.58
F2	8	45771.6	7179.9	21585.9	123106	3194.55
F3	8	31505.5	5231.04	23302.1	132018	2961.53
F4	8	33650	5477.61	24218.3	128127	3257.71
F5	8	29006.6	4716.02	22689.7	116971	2264.8
F6	8	58086.9	10481.8	27322.9	122633	6935.96
F7	8	29035.7	5060.11	24134	122404	3407.45
F8	8	31105.9	5167.63	24664.8	127299	2484
F9	8	29010.1	4722.41	20245.1	106883	3087.52
F10	8	35405.4	6117.8	24786.9	138842	4310.3
F11	8	31490	4922.8	22871.2	138525	2773.94
F12	8	53664.5	9306.26	21924	128451	5761.78
G1	8	43639.3	6770.92	22920	150409	3635.73
G2	8	47578.3	7554.99	19343.1	111370	3496.26
G3	8	37778.3	6269.85	24842.5	141000	2875.49
G4	8	31402.7	5352.13	23027.4	127454	2781.09
G5	8	27751.2	4600.76	21601.4	116266	2496.71
G6	8	28350.4	4926.26	21745.2	113631	2277.43
G7	8	29474.3	5190.76	21912.4	115705	2604.08
G8	8	36348.2	6887.72	26355.7	138299	3670.51
G9	8	33337.4	5456.47	21090.3	116076	2473.84
G10	8	37970.8	7250.28	24197.9	134362	2788.48
G11	8	83097.7	14001.5	28197	148662	8919.88
G12	8	42183.9	6447.53	20926.2	136118	3417.48
H1	8	61340.4	10146.2	23751.1	150989	8087.74
H2	8	40859.1	6979.11	21014	131949	3996.58
H3	8	38681.9	6828.16	24634	144940	5203.6
H4	8	34960.5	6677.17	23883.7	132768	2956.42
H5	8	31620.6	5744.16	23513.8	131846	2700.11
H6	8	37430.1	6485.75	24087.3	128643	3602.03
H7	8	33372.9	9160.88	26003.9	132405	2728.93
H8	8	37873.5	6876.77	24226.2	132777	2909.23
H9	8	32607.1	5880.54	20611.7	116571	2734.33
H10	8	49367.9	12105	26792.1	141053	5985.8
H11	8	41242	7663.37	22274.8	139108	3569.87
H12	8	52600.9	8247.81	19143.6	126846	2897.36
A1	9	20040.1	3690.66	14327.9	101391	2806.76
A2	9	32146.3	4437.07	16283.4	104920	2592.18
A3	9	28076.2	5897.44	18241.9	105944	2425.62
A4	9	36051.4	5389.4	18493.3	103633	3013.25
A5	9	30897.9	5036.02	19218.2	106248	3094.1
A6	9	47369.3	8064.39	22797.7	114613	4918.33
A7	9	32747.8	5185.83	19143.2	103086	3105.46
A8	9	171657	27736.3	69919.9	365015	14087.1
A9	9	42772.1	6363.82	20067.7	112157	3025.15
A10	9	33284.1	6309.45	21646.9	131366	4056.01
A11	9	34157.5	5595.08	20784.9	140040	3378.86
A12	9	34540.4	5166.27	17212.7	125337	3730.99
B1	9	36929.4	6095.54	20234.6	132731	3288.68
B2	9	38590.6	6071.3	19625.6	116649	3027.22
B3	9	27457.9	4650.79	19749	113174	2378.82
B4	9	31837.8	5665.93	20571.1	113061	2727.25
B5	9	29575	4617.95	21901.6	121825	3542.96
B6	9	26393.7	4409.54	19883.8	104564	1685.45
B7	9	27855.8	4418.82	20413.4	108236	2383.32
B8	9	107711	15328.5	64151.4	349051	8564.31
B9	9	33859.9	5613.74	19682.6	106926	2463.74
B10	9	41472.8	6783.08	23737.7	136139	2827.59
B11	9	44095.2	7094.11	24197.9	147940	3748.12
B12	9	42056.9	7252.83	20999.1	135737	5012.37
C1	9	40686.4	6695.9	21305.4	133377	4229.06
C2	9	40169.8	6298.44	26717.4	162842	4064.09
C3	9	38742.6	5539.4	20807.3	116758	2476.08
C4	9	30986.1	4819.16	21492.1	112923	2960.73
C5	9	31774.9	5235.44	20579.9	103074	3195.72
C6	9	28758.5	4742.11	20609.3	103358	2593.81
C7	9	30777.2	4859.82	22877.3	114678	2101.71
C8	9	33765.3	4951.71	22701.3	115351	2269.5
C9	9	31778.7	6453.69	19696.7	99280.5	2456.42
C10	9	34058.1	6371.17	23479.4	130863	2588.66
C11	9	36480	7005.74	25076.1	150713	2478.32
C12	9	40924.7	6360.51	19827.9	125946	2906.7
D1	9	45502.7	7506.35	22740.3	139003	3444.14
D2	9	32782.7	4911.92	20948.9	122216	2719.29
D3	9	36291	6226.95	23763.6	125667	3846.8
D4	9	31581.1	5637.34	23418.6	119984	4047.77
D5	9	34133.6	5664.3	22294.7	109736	2378.65
D6	9	39289.4	6781.83	23462.7	109622	4853.88
D7	9	27364.5	4737.78	22728.7	111617	2341.47
D8	9	28566.3	6284.37	24527.4	119870	2535.07
D9	9	36597.8	7068.78	20660.7	103061	3525.66
D10	9	42479.4	7731.07	25752.7	134164	3673
D11	9	42507	8722.68	27016.6	150051	3574.94
D12	9	143069	18793.9	27763.3	137790	7637.6
E1	9	45984.3	6586.13	21833.7	134726	4498.56
E2	9	42122.9	6842.95	21403.5	119553	3740.95
E3	9	69651.6	7868.84	24300.4	127420	5019.16
E4	9	33637.2	5866.21	24822.3	128545	2772.99
E5	9	29246.5	5147.55	22032.3	110359	2713.05
E6	9	29037.6	5036.89	22183.4	108431	3027.04
E7	9	41195.8	7013.29	24898.6	118291	5832.57
E8	9	36207.3	6575.39	26301.7	128478	3904.06
E9	9	32885	7323.59	24445	106447	2393.78
E10	9	35893.7	6282.05	25223.4	137036	3744.07
E11	9	54696.3	10543.1	26971.8	142189	6568.46
E12	9	55857.4	9384.94	22427.1	129317	5213.76
F1	9	53676.6	9593.93	26183.6	155770	9505.23
F2	9	45799.8	7025.75	21764.7	122871	3624.79
F3	9	31512.4	5177.36	23289.7	131619	2953.42
F4	9	33996.4	5811.9	24346.1	127834	3222.92
F5	9	29040.6	4961.38	22527.5	116654	2494.59
F6	9	57675.4	10370.7	27410.2	122343	6786.89
F7	9	29095.4	4880.84	24113	122129	3916.14
F8	9	31320.3	5095.66	24719.7	126930	2621.72
F9	9	29309.1	4639.53	20078.7	106755	3418.48
F10	9	35166.4	5933.36	24808.3	139073	4035.12
F11	9	31219	5134.08	22968.2	137932	2626.69
F12	9	53393.3	9108.93	21834.7	127963	5549.11
G1	9	43608.6	6759.64	22879.8	150504	4120.33
G2	9	47353	7422.51	19290	111395	3171.36
G3	9	37639.8	6297.11	24826.6	140824	3161.53
G4	9	31243.8	5254.49	23128.4	127075	2816.21
G5	9	27355	4531.07	21674.6	116134	2471.47
G6	9	28431	4965.16	21707.8	113219	2461.32
G7	9	29517.5	5152.3	22130.7	115732	2816.65
G8	9	36119.4	7045.76	26117.7	137803	3662.03
G9	9	33133.2	5361.34	20957	115899	2374.85
G10	9	38235.9	7382.81	24299.1	134062	2840.68
G11	9	82174.3	14044.3	28121.8	148045	8636.57
G12	9	42084.9	6607.69	20756.5	135308	3171.09
H1	9	60898.9	10290.4	23678.6	150526	8310.94
H2	9	40681.9	6875.87	20931	131729	3807.53
H3	9	38603.2	6896.74	24485.2	144709	5234.68
H4	9	35029.4	6704.39	23754.4	132354	2995.39
H5	9	31718.7	5521.75	23493	131226	2660.32
H6	9	37167.1	6746.4	24005.5	128524	3641.8
H7	9	33353.5	8994.94	26024.9	132077	2724.17
H8	9	37761.2	6973.26	24184.5	132462	2767.02
H9	9	32692.9	5762.25	20248.7	116020	2753.58
H10	9	48780.7	11872.3	26632.8	140885	5789.59
H11	9	41143.1	7854.2	22254	139076	3179.61
H12	9	52402.6	8130.85	18872.1	127148	3282.83
A1	10	19758.3	3933.47	14371.9	101525	2952.36
A2	10	31824.3	4642.73	16346.2	104773	2756.87
A3	10	28022.4	5692.81	18139.3	105692	2070.53
A4	10	35518.9	5621.02	18463.7	103271	3106.16
A5	10	31056.9	5032.93	19053.4	106078	3018.46
A6	10	47080.9	8523.99	22695.6	114439	5216.5
A7	10	32454.4	5345.63	18997.3	102804	2668.97
A8	10	171312	26777.3	69984	364294	13284
A9	10	42625.9	6237.73	20046.3	112432	2818.46
A10	10	33732.6	5709.64	21515.9	130895	3858.18
A11	10	34406.6	5310.11	21017.4	140006	3341.69
A12	10	34462	5117.16	17269.7	124287	3186.41
B1	10	37008.4	5983.87	19956.1	132668	3303.91
B2	10	38943.2	5946.39	19460	116393	2770.5
B3	10	27879.5	4768.34	19666.9	112672	2506.26
B4	10	31771.1	5807.55	20420.8	112755	3111.16
B5	10	29855.7	4462.8	21839.2	121880	3682.94
B6	10	26648.7	4140.33	19661.6	104627	2200.43
B7	10	27761.7	4531.58	20400.7	107688	2560.85
B8	10	107290	15730.4	63211.3	348350	8237.5
B9	10	34097.4	5664.86	19458.2	106813	2764
B10	10	41695.2	6616.17	23605.6	135414	2868.07
B11	10	43794.5	6743.9	24145	147827	3809.32
B12	10	41896.2	7202.43	20963.2	135458	4774.82
C1	10	40774	6390.37	21179.8	133759	4172.99
C2	10	40422	5980.2	26172.5	162961	4637.39
C3	10	38897.9	5498.92	20857.2	116274	2338.83
C4	10	31152.1	4851.49	21487.7	112786	2848.43
C5	10	31498.2	5179.11	20371.3	102578	2808.54
C6	10	28638.2	4501.22	20683.5	103291	2751.06
C7	10	30846.7	5040.84	22792.2	114794	1949.17
C8	10	33616	5216.61	22644.2	115172	2505.89
C9	10	31623.4	6351.07	19694	99478.8	2705.75
C10	10	33887.1	6165.65	23475.4	130620	2631.43
C11	10	36624.2	7367.56	24888.6	150168	2623
C12	10	41255.9	6324.88	19754.2	125686	2859.28
D1	10	45434.2	7395.71	22637.4	139065	3618.22
D2	10	32642.4	5065.12	21007.1	122094	2938.14
D3	10	35807.3	6441.89	23748.8	125309	3602.42
D4	10	31295.4	5767.23	23338	119681	4239.16
D5	10	34058.8	5568.87	22348.5	109677	2547.41
D6	10	39146.1	6926.98	23437.1	109380	4533.63
D7	10	27237.6	4692.02	22777.1	111661	2327.8
D8	10	28362	6412.6	24409.1	119413	2464.21
D9	10	36814.6	7049.33	20568.8	102722	3788.69
D10	10	42369.1	7606.35	25558.2	133809	4033.92
D11	10	42623.4	8639.74	26795.1	150305	3444.62
D12	10	142069	18683.7	27686.7	137264	7202.36
E1	10	45723.7	6740.04	21813	134646	4279.35
E2	10	41779.1	7029.27	21283.3	119362	3857.76
E3	10	69353.8	7814	24447.8	127094	5241.23
E4	10	33719.6	5879.55	24609.6	128593	3338.29
E5	10	29153.3	5041.4	22069.2	109993	2801
E6	10	29002.3	4896.14	22260.7	108631	3138.88
E7	10	40927.3	7161.52	24959.8	118287	5429.28
E8	10	36179.9	6749.57	26415.8	128408	4275.46
E9	10	33168.4	7479.5	24455	106057	2724.79
E10	10	36137.4	6532.58	25125.9	136956	3599.01
E11	10	54826.4	10640.4	27038.8	141953	6919.25
E12	10	55641.9	9237.82	22206.6	129278	5379.57
F1	10	53559.4	9754.02	26360.2	155453	9594.54
F2	10	45574.1	7198.78	21501.1	123007	3685.08
F3	10	31898.7	5245.35	23268.4	131784	2926.39
F4	10	33766.5	5501.91	24154.4	127544	3595.13
F5	10	29162.1	4584.84	22273.9	116270	2303.81
F6	10	57726	10561.1	27370.4	121878	7081.04
F7	10	28918.5	4936.18	23992.9	121855	3427.24
F8	10	31271.1	5013.52	24623.6	126630	2254.73
F9	10	29153.9	4752.98	19895	106486	3239.81
F10	10	35168.1	6266.53	24729.5	138523	4285.84
F11	10	31356.6	5122	22810.9	137720	2706.28
F12	10	53651.7	9046.3	21877.3	127329	5452.3
G1	10	43446.3	6904.79	22996.5	150501	3853.54
G2	10	47283.8	7521.87	19241.4	111603	3166.99
G3	10	37255.1	6427.07	24769.1	140494	3347.51
G4	10	31320.5	5155.25	23034.6	127069	2772.92
G5	10	27387.4	4654.96	21508.8	115728	2809.09
G6	10	28008.2	4908.26	21689.4	113505	2476.95
G7	10	29489.9	5220.92	21968.3	115230	2616.63
G8	10	36057.2	6732.95	26044.5	137656	3968.12
G9	10	33084	5211.37	21049.9	115767	2331.05
G10	10	37937.4	7501.03	24222.9	133459	3015.59
G11	10	81888.2	13968.9	27983.5	148008	8596.25
G12	10	41833.5	6532.46	20744	134691	2899.61
H1	10	61432.9	10092.8	23476.9	149372	8324.89
H2	10	40719.5	7130.77	20921.6	131257	3696.87
H3	10	38535.2	6930.48	24458.5	144148	5005.69
H4	10	35150.2	6703.56	23678.6	131671	2959.67
H5	10	31324.6	5786.38	23373.8	130410	2619.79
H6	10	37131.9	6513.95	23887.7	127636	3602.03
H7	10	33571.4	9167.96	26000	131271	2866.25
H8	10	37506.9	6897.75	24001.9	132021	2927.09
H9	10	32670.4	5799.93	20459.9	115449	2618.84
H10	10	48562.2	11904.6	26730.5	140398	5792.58
H11	10	40798.1	7857.65	22347	139150	3048.77
H12	10	51822.5	8505.42	18971.2	126764	3296.95
A1	11	19794	3861.47	14466.2	101026	2411.76
A2	11	31493	4505.09	16042.8	104652	2762.4
A3	11	27545.1	5834.91	18176.3	105382	2549.4
A4	11	35434.4	5608.34	18391.8	103261	2947.79
A5	11	30470.5	5121.46	18936.4	106164	3038.11
A6	11	46803.5	8269.7	22665.5	114452	5145.36
A7	11	32774.6	5252.26	18742.7	102299	2683.14
A8	11	169734	27167.2	69733.4	362109	14749.1
A9	11	42279.3	6489.92	19888.5	112107	3036.03
A10	11	33507.1	6156.09	21513.7	130701	4369.88
A11	11	34445.2	5262.22	20716.6	139630	3550.77
A12	11	33705	4992.17	17428.3	124300	3283.1
B1	11	37030.3	6089.55	20030.8	131781	3033.24
B2	11	38508.6	5671.3	19355.2	116743	3225.3
B3	11	27867.1	4464.25	19572.2	112086	2080.29
B4	11	31776.9	5928.78	20516	112434	3021.65
B5	11	29938.2	4739.7	21487.2	121187	3479
B6	11	26611.8	4324.62	19668.2	104260	2119.73
B7	11	28188.1	4491.37	20420.6	107670	2441.91
B8	11	107626	15231.4	63428	348338	8121.44
B9	11	34082.1	5471.32	19546.1	106495	2297.04
B10	11	41206.5	6625.06	23449.7	135110	2592.62
B11	11	44055.6	7162.98	24007.1	147034	4095.69
B12	11	42215.9	7344.98	20732.4	134525	5030.64
C1	11	40736.5	6332.7	21326.1	133139	4175.23
C2	11	40248.8	6073.8	26653.1	162836	4145.75
C3	11	39216.5	5424.91	20708.7	115832	2171.21
C4	11	31255.8	4898.91	21269.4	112359	2934.81
C5	11	31572.4	5090.17	20168.9	102218	3368.24
C6	11	28452.2	4654.06	20498.4	103206	2535.06
C7	11	30612.2	5020.99	22894.9	114556	2274.03
C8	11	33900.1	5140.43	22534.4	115192	2703.62
C9	11	31570.7	6464.12	19607.2	99300.6	2595.03
C10	11	33914.7	5982.64	23414.4	130235	2412.64
C11	11	36322.2	7416.75	24757.8	149946	2219.88
C12	11	40913.1	6153.84	19592.9	124970	3045.4
D1	11	45663.8	7415.73	22491.4	138458	3535.51
D2	11	32856.9	5252.89	21232.3	121877	2851.69
D3	11	35985.1	6172.16	23658.9	125302	3222.17
D4	11	31536.9	5707.91	23331.7	119465	4100.64
D5	11	34188.1	5651.07	22267.9	109112	2376.65
D6	11	38990.8	6733.46	23265.2	109277	4388.97
D7	11	27386.2	4517.6	22655.6	111412	2476.3
D8	11	28702.5	6462.13	24409.1	119292	2374.7
D9	11	36511.9	6716.05	20583.7	102185	3550.52
D10	11	42164.2	7966.46	25584.1	133509	3898.45
D11	11	42359.9	8439.63	26687.9	149608	3394.58
D12	11	140883	18347.3	27436.9	136991	7298.75
E1	11	45747.7	6630.93	21786.8	134232	4071.67
E2	11	41931.5	6624.14	21254.8	118963	3961.01
E3	11	69124.6	7806.57	24249.1	127099	4785.8
E4	11	33571.9	5965.83	24708.6	128472	3250.02
E5	11	29151.7	5005.13	21836.9	109460	2826.53
E6	11	28776.6	4920.31	22072.4	108122	3247.06
E7	11	40957.3	7036.51	24851.5	117844	5449.16
E8	11	36189.9	6475.21	26193.3	128043	4057.61
E9	11	33025.5	7389.65	24202.8	105789	2445.21
E10	11	35863.1	6505.93	25058.2	136812	3599.01
E11	11	54331.4	10568.1	26959.4	141523	6850.43
E12	11	55476.4	8954.44	22142.4	128766	5333.97
F1	11	53586.1	9425.27	26046.2	154879	9590.71
F2	11	45103.9	7026.8	21358.7	122891	3406.09
F3	11	31595.9	5236.4	23169.2	131468	2897.56
F4	11	33744.3	5573.13	24127.2	127291	3328.15
F5	11	29176.4	4853.68	22331.2	116254	2187.64
F6	11	57687.2	10444.7	27238	121779	6650.58
F7	11	29015.6	4883.18	24043.7	121451	3562.45
F8	11	31005.3	5162.94	24541.3	126594	2557.39
F9	11	29169.7	4798.85	19940.5	106147	3568.22
F10	11	35294.7	6055.75	24613.8	138416	4409.89
F11	11	31467.2	4914.75	22801	137632	2602.81
F12	11	53275.1	9213.6	21666	127018	5753.5
G1	11	43004.7	6738.51	22873.3	149631	4049.44
G2	11	47138.4	7502.94	19111	111160	3238.09
G3	11	37185	6208.96	24717	139773	2986.19
G4	11	31359.7	5381.98	22951.1	126667	3057.16
G5	11	27554.9	4815.23	21367.8	115370	2502.23
G6	11	28225.2	4870.81	21770.1	112981	2147.88
G7	11	29664	5257.87	21772.2	114804	2538.98
G8	11	36236.9	6846.77	25895.6	137310	3734.95
G9	11	32750.1	5411.05	20896.8	115649	2287.25
G10	11	38010.3	7331.77	24139.6	133459	3044.89
G11	11	81437.5	13656.9	27825.6	147398	8549.39
G12	11	41755.9	6614.97	20565.2	134734	3063.87
H1	11	60881.5	9991.4	23454.9	148965	7987
H2	11	40821.5	7138.42	20729.7	131214	3985.06
H3	11	38196.7	6993.61	24365.1	143721	5018.12
H4	11	34959.7	6729.13	23677.8	131301	3004.33
H5	11	31378.2	5631.83	23269.5	129906	2570.25
H6	11	36984.3	6538.34	23920.7	127645	3735.87
H7	11	33534.7	9307.17	25753.4	130935	2767.82
H8	11	37512.3	6836.91	23879.7	131465	2647.67
H9	11	32650.4	5856.01	20232.3	115571	2962.71
H10	11	48186.3	12057.7	26433.5	139817	5432.04
H11	11	40998.4	7719.7	22325.1	139307	2833.34
H12	11	52280.3	8348.48	18756.6	125877	2845.12
A1	12	20000.7	3449.53	14390.7	100660	2743.33
A2	12	31545.7	4616.82	16131.7	104348	2914.64
A3	12	27919.8	5756.75	18313	105141	2253.08
A4	12	35568.8	5476.98	18484.2	102957	3172.68
A5	12	30595.7	4935.14	19093.8	105919	3161.87
A6	12	46881.7	8342.65	22542	114284	5067.94
A7	12	32603.2	5261.88	18957.1	102438	2674.64
A8	12	168341	26282.1	69135.9	361206	13789.8
A9	12	42445.1	6093.32	19754.1	111766	2900.54
A10	12	33360.2	5892.54	21540.6	130384	3560.89
A11	12	33957.1	5311.31	20960.7	139527	3662.27
A12	12	34266.8	5178.17	17158.5	123924	3459.41
B1	12	36949.1	6261.03	19954.3	131833	3791.12
B2	12	38634.9	5986.54	19530.8	115558	2964.67
B3	12	27968.4	4634.18	19641.7	112778	2359.94
B4	12	31754.7	5798.49	20603.2	112811	3066.94
B5	12	29849.1	4605.02	21463.7	120525	3680.53
B6	12	26426.1	4180.08	19722.5	104355	2168.69
B7	12	28055	4680.19	20343.6	107290	2179.17
B8	12	107408	14875.3	63357.7	347395	9193.5
B9	12	33834	5728.77	19533.9	106441	2491.37
B10	12	41206.5	6651.72	23408	134932	2860.17
B11	12	43728	6690.2	24037	146681	4286.21
B12	12	41497	7395.38	20645.4	134420	4735.47
C1	12	41124.6	6614.92	21235.1	133008	4124.77
C2	12	40410	5810.01	26685.3	162475	4547.23
C3	12	38957	5627.29	20523	116359	2060.96
C4	12	31471.6	4926.92	21348.1	112832	3234.99
C5	12	31617.7	5261.13	20108	102118	3097.42
C6	12	28585.3	4414	20630.2	102866	2544.56
C7	12	30818.1	4961.44	22835.6	114261	2133.86
C8	12	33688.5	5117.92	22496.3	114644	2637.11
C9	12	31663.3	6858.08	19574.6	98917.7	2384.41
C10	12	33723.9	6197.95	23398.4	130002	2843.25
C11	12	36451.6	7483.43	24642.3	149973	2434.14
C12	12	40873.3	6166.9	19534.1	125118	2604.41
D1	12	45109.8	7288.24	22671.3	138084	3277.75
D2	12	32818.7	5278.23	20829	122012	3072.74
D3	12	35819.5	6165.84	23645.2	125153	3485.5
D4	12	31664.8	5631.21	23371.9	119780	3784.47
D5	12	33855.8	5641.62	22141.5	108838	2658.25
D6	12	38713.8	6701.49	23156.4	109186	4284.34
D7	12	26913.2	4662.66	22709.5	111692	2364.24
D8	12	28518.1	6559.41	24304.8	119244	2483.79
D9	12	36436.2	7097.07	20446.3	102250	3815.47
D10	12	42253.2	7754.52	25560.1	133310	4114.23
D11	12	42735.6	8532.95	26789.9	149809	3784.49
D12	12	139920	18202	27307.3	136273	7528.29
E1	12	45888.2	6628.63	21768.3	134088	3759.11
E2	12	41738.9	6946.95	21327.6	119210	3754.51
E3	12	68918.6	7728.49	24162.4	126916	5006.93
E4	12	33339.4	5522.86	24598.6	128266	2950.47
E5	12	29300.8	4974.17	21849.8	109063	2902.18
E6	12	28865.2	4934.99	22215.2	108480	3534.91
E7	12	40692	7067.76	24820.4	117607	5559.92
E8	12	36110.9	6914.72	26323.4	128042	3790.81
E9	12	32894.1	7391.41	24198.3	105744	2577.99
E10	12	35922.5	6293.6	25065.5	136647	3528.31
E11	12	54093.7	10493	26747	141560	6483.39
E12	12	55112.7	9142.52	22213.2	128517	5188.89
F1	12	53416.9	9645.39	26063.2	154790	9542.23
F2	12	45126.9	6946.06	21342.5	122263	3439.82
F3	12	31646.4	5221.19	23252.5	131222	3056.13
F4	12	33765	5695.45	24060.7	127545	3122.04
F5	12	28900.9	4962.18	22396.9	116294	2230.89
F6	12	57622.1	10530.9	27138.3	121592	6967.84
F7	12	28974.6	4965.02	23996.1	121712	3412.4
F8	12	31169	5244.29	24545.3	126242	2508.74
F9	12	29092.9	4829.43	19943.8	105844	3156.43
F10	12	34966.9	5953.76	24723.5	138258	4299.82
F11	12	31219	5192.43	22732.7	137172	2536.15
F12	12	52470.8	9044.58	21755.3	127096	5544.15
G1	12	43618.8	6659.6	22770.8	149519	3841.94
G2	12	47130	7383.47	19273.5	111024	2998.52
G3	12	37644.3	6317.1	24797.4	139758	2856.01
G4	12	31455.2	5171.38	23016.1	126375	2579.35
G5	12	27550.5	4756.39	21349.9	115232	2608.73
G6	12	28075.4	4862.16	21664.5	112798	2317.63
G7	12	29610.9	5288.03	21849.5	114595	2657.42
G8	12	36010.4	6888.54	26115.2	137181	3774.8
G9	12	32805.2	5219.08	20973.3	115536	2188.26
G10	12	38034.9	7449.08	24166.5	133403	3253.68
G11	12	80796.8	13832.6	27747.2	147275	8844.69
G12	12	41410.8	6526.39	20573.2	134161	2931.55
H1	12	61012.6	10071.5	23442.3	149084	8335.74
H2	12	40610.8	6875.87	20795.3	131077	3523.96
H3	12	38142.8	6755.23	24290.2	143541	5031.59
H4	12	34942.7	6585.64	23573.3	131167	2673.85
H5	12	31371.5	5643.14	23195.5	129707	2707.62
H6	12	37018.7	6373.72	23859.9	127092	3652.51
H7	12	33507	9244.25	25696.6	130540	2658.29
H8	12	37419	6942.5	23822.7	130969	2919.95
H9	12	32726.7	5615.91	20381.5	115258	2771.08
H10	12	48025.8	12049.6	26377.8	139965	5521.67
H11	12	40594.3	7734.64	22361.2	139583	2945
H12	12	52125	8363.29	18931.8	125771	3330.84
A1	13	20012	3968.64	14419	100654	2668.36
A2	13	31651.1	4814.39	16019.8	104504	3127.77
A3	13	27711.3	6021.07	17950.6	105099	2548.15
A4	13	35526.6	5382.49	18308.5	102621	2961.52
A5	13	31015.2	4710.72	18764.4	105301	3170.71
A6	13	46788.1	8116.5	22490.4	114075	4846.14
A7	13	32533.6	5190.65	18695.7	101536	2525.37
A8	13	167540	26982.2	68926.1	360464	15080.1
A9	13	42243.6	6547.88	19822.3	111389	2954.93
A10	13	33695.9	5984.55	21360.3	130032	3601.78
A11	13	34383.7	5142.49	20838.1	139724	3325.43
A12	13	34248.6	4963.9	17161.2	123445	3477.89
B1	13	36914	6127.44	19808.7	131258	4107.47
B2	13	38210.1	5941.93	19339.7	115821	3076.74
B3	13	27998.5	4772.17	19664.4	112305	2062.59
B4	13	31657.5	6023.95	20384.1	112157	2788.72
B5	13	29710.4	4467.11	21429.6	120184	3546.58
B6	13	26674.6	4116.84	19603.5	103644	1791.53
B7	13	27947.3	4664.45	20278.4	107108	2481.85
B8	13	106660	15306.9	63247.9	345865	8374.95
B9	13	33923.1	5685.86	19469.4	106494	2364.27
B10	13	41094.2	6569.75	23170.6	134402	2492.9
B11	13	43771.5	6903.83	23817.5	146369	3992.92
B12	13	41758.2	7298.9	20569.4	134084	4660.97
C1	13	40765.3	6881.18	21365.3	132351	4177.48
C2	13	40454.6	6056.78	26661.6	162072	4642.49
C3	13	39194.5	5565.99	20626.3	115760	2152.09
C4	13	31133.1	4921.54	21277.2	112393	2981.24
C5	13	31573.4	5146.5	20094.6	101629	3136.54
C6	13	28686.3	4585.95	20542.9	102750	2363.11
C7	13	30818.9	5137.7	22722.9	114095	2287.22
C8	13	33613.5	5126.58	22494.5	114417	2322.53
C9	13	31407.7	6450.21	19447.1	99018.3	2563.53
C10	13	33762.5	6389.77	23396.4	129313	2433.52
C11	13	36397.2	7408.01	24638	149120	2714.66
C12	13	40433	6365.26	19573.3	124905	2911.44
D1	13	45328.3	7235.55	22483.4	137936	3598.03
D2	13	32932.3	4906.16	20938.8	121598	2662.38
D3	13	35981	6190.08	23507.7	125198	3502.36
D4	13	31683.1	5497.23	23278.7	119370	3787.64
D5	13	34108.1	5736.11	22012.1	108773	2714.17
D6	13	38460.1	6675.57	23257.9	108778	4203.36
D7	13	26982.3	4623.81	22729.6	111257	2531.88
D8	13	28889.4	6478.93	24518.1	119068	2467.01
D9	13	36241	7007.79	20409.2	101705	4041.21
D10	13	42093.7	7646.67	25565.9	132983	4090.04
D11	13	42243.5	8824.29	26764.1	148840	3777.19
D12	13	139560	18301.5	27244.9	135747	7294.77
E1	13	45177.2	6718.22	21623.2	133124	4045.45
E2	13	41510.4	6974.03	21176.8	118479	3754.51
E3	13	68315.8	7850.25	24139.1	126870	5073.74
E4	13	33172.2	5755.91	24660.9	128043	2846.23
E5	13	29188.2	5066.17	21836	108955	3025.12
E6	13	28583	4897	22040.6	108240	3278.23
E7	13	41014.1	6887.38	24773.3	117366	5502.17
E8	13	35751.5	6847.03	26191.4	127670	3870.47
E9	13	33092	7446.03	24098.5	105055	2594.82
E10	13	35698.9	6444.63	24950.8	136520	3580.64
E11	13	53640.8	10647.2	26762.3	140881	6789.26
E12	13	54851.6	9193.51	22083	127940	5401.12
F1	13	53075.6	9549.62	26209.8	154164	9290.88
F2	13	44892.8	7147.39	21475.8	121807	3295.72
F3	13	31711.6	5148.73	23012.4	130842	2930.89
F4	13	33764.2	5672.83	24158.7	126991	3156.83
F5	13	29025.5	4613.99	22349.5	115590	2494.59
F6	13	57723.9	10590.6	27148.5	121173	6612.32
F7	13	28998.3	4941.64	23939.7	121365	3258.23
F8	13	31071.4	5248.2	24420.2	125722	2664.61
F9	13	29168.2	4794.02	19835.4	105014	3352.97
F10	13	34621.5	5980.11	24594.9	137811	3907.58
F11	13	31264.5	5035.48	22608	136805	2946.07
F12	13	52663.2	9030.86	21568.6	126311	5615.31
G1	13	43105.6	6900.56	22728	148985	3992.73
G2	13	47261.2	7540.8	19249.2	110374	3240.28
G3	13	37283.9	6440.7	24480.9	139134	3270.46
G4	13	31494.3	5377.14	22992.9	126096	2851.33
G5	13	27507	4539.59	21330.5	114661	2586.64
G6	13	28114	4735.41	21693.1	112602	2459.08
G7	13	29570.6	5220.92	21789	114412	2835.47
G8	13	36055.7	6973.7	25926.3	136623	3814.65
G9	13	32575.5	5267.93	20905.4	114940	2498.37
G10	13	37848.7	7175.95	24148.6	133013	2793.97
G11	13	80413.3	13909.2	27753.7	146665	8331.46
G12	13	41558	6394.14	20483.2	133667	3229.26
H1	13	60650.2	10035.9	23256.3	147926	8529.49
H2	13	40308.7	6954.89	20818.7	130394	3860.56
H3	13	38080.2	6775.91	24343.5	142993	4971.5
H4	13	34724.7	6609.55	23467.9	130789	2654.36
H5	13	31254	5744.92	23310.9	129032	2632.55
H6	13	36684.5	6496.42	23787.2	126429	3879.64
H7	13	33188	9100.33	25638.3	130061	2679.72
H8	13	37283.1	6880.27	23745	130345	2907.8
H9	13	32614.9	5816.57	20245.2	115239	2835.83
H10	13	47778.9	12057.7	26497	139377	5288.62
H11	13	40702.8	7920.88	22275.9	139398	3107.42
H12	13	52541.4	8690.48	18941.3	125711	3431.09
A1	14	19461.4	3920.07	14241.4	100467	2502.58
A2	14	31084.5	4717.22	16136.3	104200	2426.1
A3	14	28120.1	5661.54	18235.1	104838	2384.36
A4	14	35440.8	5592.21	18359.8	102903	3071.32
A5	14	30434.5	5021.61	19007.9	105012	2995.87
A6	14	46575.7	8181.11	22446.3	113532	4972.73
A7	14	32309.8	5058.76	18648.7	101943	2490.41
A8	14	167587	26728.9	68885.3	360062	14681.7
A9	14	42052.4	6328.23	19795.9	111222	3266.45
A10	14	33458.6	6147	21430.8	129865	3636.04
A11	14	34053	5164.04	20787.2	139138	3522.89
A12	14	33996.8	5097.82	17273.9	122805	3459.41
B1	14	37414.3	5756.56	19879.7	131400	3748.83
B2	14	37964.1	6173.9	19297.2	115589	3113.23
B3	14	28006.8	4788.78	19482.6	112141	2326.9
B4	14	31758.2	6020.55	20363.5	112277	3001.16
B5	14	29615.7	4503.74	21262.4	120068	2886.5
B6	14	26677.4	4150.27	19726.3	104082	2323.73
B7	14	28177.3	4614.63	20234.9	107023	2259.94
B8	14	106560	15652.1	63399.9	344956	9043.84
B9	14	33700.9	5697.73	19375.9	106443	2332.04
B10	14	40857.9	6419.63	23227.2	134233	2647.9
B11	14	43335.2	6579.3	23852	145724	3999.85
B12	14	41595.9	7123.23	20410.5	133454	5016.59
C1	14	40489.8	6536.39	21175.2	132652	3961.03
C2	14	40200.7	5827.03	26548.2	162413	4666.31
C3	14	39120.3	5445.72	20683.1	115962	2507.58
C4	14	31045.3	4991.58	21288.3	112503	3117.3
C5	14	31533.9	5207.77	20092.5	101414	3231.83
C6	14	28415.3	4576.81	20486.1	102451	2402.86
C7	14	30516.5	5218.69	22674.4	113842	2263.31
C8	14	33599.8	5207.95	22297.6	113870	2629.92
C9	14	31331.3	6443.25	19532.1	98846.5	2755.26
C10	14	33607.3	6178.38	23308.5	128832	2682.15
C11	14	36290.5	7459.38	24630.3	148680	2452.92
C12	14	40837.4	6446.03	19628.6	124301	3195.95
D1	14	45160.5	7391.5	22725.3	137677	3458.57
D2	14	32933.5	5184.93	20879.4	121925	2713.81
D3	14	35960.7	6309.14	23710.7	125071	3537.12
D4	14	31454.1	5677.23	23350.8	119389	3793.99
D5	14	34134.4	5723.82	22158.4	108112	2778.08
D6	14	38441.7	6577.95	23213.1	108812	4415.35
D7	14	27227.2	4522.78	22504	111285	2425.28
D8	14	28760.7	6669.96	24405.4	119255	2342.07
D9	14	36007.4	7021.93	20334.1	101496	3659.57
D10	14	42293.1	7635.42	25478.7	132771	4230.34
D11	14	42334.5	8678.1	26789.9	148848	3781.36
D12	14	138530	18161.1	27133.3	136068	7390.17
E1	14	45732.1	6988.14	21536	133448	4236.35
E2	14	41875.4	7036.86	21093.5	118672	3823.34
E3	14	68374.7	7657.85	24171.7	126794	4866.72
E4	14	33390	5875.99	24660	127630	2571.09
E5	14	29251.4	5067.05	21706.9	108693	2806.67
E6	14	28836.9	4941.9	22137	108298	3280.06
E7	14	41278.6	6910.6	24721.5	117624	5221.95
E8	14	35905.4	6896.67	26116	127965	4153.58
E9	14	32929.9	7302.45	24163.8	105313	2540.59
E10	14	35764.4	6335.35	24871.3	136427	3587.99
E11	14	53504.8	10321.5	26614	140832	6570.38
E12	14	54603.4	9262.9	21877.9	128174	5142.47
F1	14	53194.3	9721.15	25881.4	154059	9571.58
F2	14	44555.3	7219.75	21216.3	122069	3380.54
F3	14	31539.4	5205.99	23094.8	130749	2909.27
F4	14	33872	5635.12	23990	126691	3204.66
F5	14	28984.7	4827.77	22342.9	115772	2101.15
F6	14	57421.2	10393.3	27076.8	121067	6818.78
F7	14	28924.9	4963.46	23931.6	121094	3555.03
F8	14	31147.7	5212.22	24404	125858	2648.94
F9	14	29111.7	4868.05	19890	104871	3378.49
F10	14	34902.3	6016.65	24546.1	137567	4342.63
F11	14	31478.6	5045.54	22652.5	136396	2563.01
F12	14	52850	9153.54	21616.9	126296	5490.36
G1	14	42879	6883.65	22717.6	148788	4425.77
G2	14	46972.6	7479.29	19161.9	110423	3171.36
G3	14	37262.3	6379.81	24564	139363	3076.52
G4	14	31433.3	5464.29	22823.6	126280	2869.3
G5	14	27355.7	4634.05	21131.2	114376	2793.32
G6	14	28016.8	4935.63	21530.3	112462	2115.87
G7	14	29564.2	5343.07	21849.5	113954	2367.21
G8	14	35925.9	7043.31	25907.2	136559	3681.53
G9	14	32899.3	5309.07	20752.3	115275	2677.07
G10	14	37877.7	7378.34	24173.7	133121	2954.23
G11	14	80189.7	13386.7	27500	146290	8415.37
G12	14	41231.6	6634.38	20461.6	133703	2907.59
H1	14	60229.9	9978.95	23330.4	147629	8473.69
H2	14	40495.3	6712.74	20814	130046	3108.97
H3	14	38309.9	6937.01	24317.9	142851	5002.58
H4	14	34648.5	6448.75	23421.6	130546	2776.97
H5	14	31338.8	5607.7	23025.2	128733	2561.24
H6	14	36879.3	6464.41	23635.6	126210	3506.44
H7	14	32999.3	9265.49	25690.4	129563	2506.68
H8	14	36994.3	6743.22	23711.6	129972	2953.53
H9	14	32626.2	5700.91	20219.3	115151	2472.71
H10	14	47274.9	11944.9	26469.6	139476	5361.32
H11	14	40760.7	7779.48	22231	139275	3279.99
H12	14	53172.7	8401.78	18753.9	125275	3243.3
A1	15	19878.6	4008.82	14290.1	100385	2664.04
A2	15	31246.4	4577.96	16121	103988	2469
A3	15	27870.9	6083.6	18187.2	104669	2594.41
A4	15	35389.6	5671.72	18251.4	102891	3265.59
A5	15	30873.1	4911.46	18876.3	105065	3044
A6	15	46331.3	8046.67	22430.2	113408	5298.11
A7	15	32615	5166.58	18671.2	101266	2904.22
A8	15	167205	25744.2	68407.4	359120	13326.9
A9	15	41921.1	6495	19626.9	111208	2915.38
A10	15	33206.8	5753.94	21245	129413	3977.54
A11	15	33834	5227.5	20810.3	139553	3292.91
A12	15	33489.7	5085.92	16981.8	122266	3175.04
B1	15	36560.8	5626.96	19774.1	131391	3945.07
B2	15	37893.6	5977.62	19281.6	115432	2870.84
B3	15	27775.4	4547.3	19451.1	111897	2330.44
B4	15	31689.1	6062.47	20573.4	112214	3346.24
B5	15	29522.2	4575.93	21374.2	119941	3828.95
B6	15	26499.1	3964.16	19668.2	103769	2031.79
B7	15	27869.4	4644.35	20228.6	106749	2156.97
B8	15	107432	14554.4	62806	344212	8035.92
B9	15	33608.9	5742.46	19524.6	106175	2610.18
B10	15	40781.9	6447.28	23334.5	134281	2574.84
B11	15	43557.9	6916.67	23822.1	146138	4004.47
B12	15	41545.6	6999.4	20413.2	133703	4580.85
C1	15	40473.5	6548.66	21099.2	132245	3714.31
C2	15	40082.3	5878.09	26318	162623	4149.15
C3	15	39134.2	5442.25	20714.5	115597	2320.83
C4	15	31029.5	4924.77	21114.3	111903	3238.23
C5	15	31501.1	5154.4	20248.5	100986	3525.72
C6	15	28699.9	4783.64	20342	102629	2610.23
C7	15	30716.3	5016.23	22682.8	114151	2149.53
C8	15	33547.8	5115.33	22459.1	113632	3014.61
C9	15	31560.5	6526.74	19478.7	98706.6	2325.9
C10	15	33588.5	6087.36	23183.6	128381	2604.57
C11	15	36871.6	7317.28	24567.1	148532	2493.78
C12	15	39824.4	6530.36	19437.3	124022	2944.63
D1	15	44854.8	7200.78	22429.5	137397	3512.43
D2	15	32832.6	5210.27	20842.4	121779	2827.62
D3	15	35616.2	6287.01	23505.6	125035	3173.71
D4	15	31220.3	5417.45	23295.6	119086	3868.01
D5	15	33792.5	5484.78	21988.2	108388	2720.16
D6	15	37886.1	6503.65	23344.7	108833	4511.79
D7	15	27163.8	4565.96	22542.4	111387	2161.07
D8	15	28902.7	6639.89	24374.7	118999	2330.88
D9	15	35797.2	6757.6	20270	101551	3519.92
D10	15	42123.4	7883.93	25537.1	132971	4087.13
D11	15	42347.2	8757.93	26728.1	148914	3584.32
D12	15	137776	18008.9	27077.5	135514	7242.11
E1	15	45309.3	6392.01	21742.1	133532	4099.99
E2	15	41500.9	6887.37	21065.1	118612	3819.17
E3	15	67894	7737.79	24053.3	126502	5068.09
E4	15	33448.7	5749.68	24623.4	127923	3057.52
E5	15	29077.9	5015.74	21721.7	108578	3001.47
E6	15	28608.8	5166.42	21987.8	108285	3040.79
E7	15	40774	7136.52	24743.2	117308	5202.07
E8	15	36034.3	6841.62	26156.6	127755	3977.96
E9	15	32961.4	7356.18	24119.4	105047	2435.86
E10	15	35780.1	6258.95	24977.9	136657	3356.62
E11	15	53469.6	10542.1	26557.5	140482	6752.94
E12	15	54279.3	9145.03	22026	127798	5138.32
F1	15	52786.2	9596.79	25822.5	153961	9460.58
F2	15	44837.5	7025.75	21240.5	122054	3388.72
F3	15	31735.1	5248.03	23139.1	130387	3167.85
F4	15	33850.6	5845.41	23903.1	126483	3158.57
F5	15	29106.2	4758.94	22278.9	115524	2340.27
F6	15	57176	10653.3	27015.3	121156	6982.99
F7	15	29162.3	5039.07	23955.8	121004	3493.19
F8	15	31073.6	5096.44	24470.2	125860	2328.95
F9	15	29191.6	4693.44	19807.3	104761	3192.17
F10	15	34618.9	5938.46	24433	137505	4297.2
F11	15	31675.1	5062.65	22637.7	136456	2691.36
F12	15	52486.3	8988.82	21446.6	125952	5410.1
G1	15	42829.3	6679.32	22594.4	148381	4143.52
G2	15	46831.9	7598.76	19083.4	110896	3130.89
G3	15	37151.8	6329.83	24409.3	138993	3119.91
G4	15	31421.5	5222.22	22919.8	125935	2759.04
G5	15	27287.1	4622.44	21171.7	114268	2483.3
G6	15	28365.1	4793.74	21490	111772	2194.79
G7	15	29635.7	5076.14	21533.1	113892	2655.07
G8	15	36052.6	6927.02	25807.4	136397	3928.27
G9	15	32904.3	5123.1	20787.6	115218	2787.45
G10	15	37840.8	7295.05	23876.3	132376	2683.17
G11	15	79904.7	13602.9	27436.8	145626	8221.41
G12	15	41693	6473.01	20487.8	133153	3076.41
H1	15	60276.2	9898.86	23267.4	147040	7962.2
H2	15	40119.4	6907.74	20783.6	129860	3520.5
H3	15	37933.6	7011.03	24232.7	142760	4907.25
H4	15	34580.4	6471.84	23372.9	130073	2902.83
H5	15	31294.9	5641.63	22967.5	128330	2766.92
H6	15	36787.9	6416.4	23650.6	125620	3719.04
H7	15	33316.8	9226.16	25667	129338	2335.23
H8	15	37283.1	6751.61	23608.2	129883	2870.64
H9	15	32304.8	5572.1	20308.2	115196	2822.71
H10	15	47478.1	11981.1	26288.9	139493	5662.11
H11	15	40987.5	7559.9	22368.9	139466	2940.49
H12	15	52632.3	8709.72	18887	125172	2983.49
A1	16	19837.2	3960.26	14475.6	100683	3095.07
A2	16	30881.2	4594.15	16041.3	103818	2639.23
A3	16	27724.3	6072.23	18144.8	104303	2206.81
A4	16	35419.1	5670.57	18121.3	102606	3162.12
A5	16	30369.1	4831.16	18829.7	104477	3108.83
A6	16	46182.8	7995.6	22145.5	113166	4843
A7	16	32081.6	5188.72	18590.9	100867	3083.73
A8	16	166977	25584.8	68319.9	358182	13869.4
A9	16	41559.6	6088.24	19776.5	110549	2995.48
A10	16	33769.3	5835.73	21411.8	129078	3923.39
A11	16	34194.7	5329.27	20738.6	138639	3272
A12	16	34587.8	5233.23	17037.5	122461	3254.66
B1	16	36567.4	5447.5	19819.6	130934	3312.37
B2	16	38211.8	5989.52	19083.4	115310	3144.5
B3	16	27994.4	4475.75	19553.3	111933	2440.18
B4	16	31577.9	6259.6	20432.3	111902	3179.09
B5	16	29721.4	4721.39	21205.9	119549	3702.25
B6	16	26697.7	4284.87	19631.6	103613	1951.1
B7	16	27749.9	4433.68	20253.9	106466	2181.83
B8	16	106843	14956.3	62352.8	344042	8567.37
B9	16	33712.4	5635.65	19515.2	105844	2494.14
B10	16	40890	6438.39	23161.6	133590	2789.09
B11	16	43138.2	6754.4	23601.4	145454	3772.37
B12	16	41662.5	7120.35	20576.3	133182	4533.06
C1	16	40325.8	6535.16	21155.7	132613	4044.02
C2	16	40135.5	5837.24	26426.4	162229	4224
C3	16	39367.1	5621.5	20635.6	115575	2231.96
C4	16	30748.1	5165.08	21113.2	112207	2992.04
C5	16	31207.1	5036.81	19976.9	100930	3045.26
C6	16	28457.8	4631.63	20372.6	102387	2615.41
C7	16	30834.3	5102.77	22668.6	113901	2160.25
C8	16	33342.2	5281.54	22248.7	113205	2756.65
C9	16	31376.3	6639.79	19448.9	98771.5	2363.7
C10	16	33605.3	6499.38	23139.6	128198	2905.91
C11	16	36825.1	7507.48	24321.9	148175	2495.99
C12	16	40164.7	6503.04	19539.9	123970	2813.05
D1	16	44993.9	7444.18	22357.5	137538	3511.47
D2	16	33049.4	5340.44	20890.6	122176	2618.61
D3	16	35416	6515.65	23628.2	124975	3407.55
D4	16	31549.4	5657.8	23250.1	118975	4047.77
D5	16	33503.2	5736.11	21760.3	107686	2684.22
D6	16	37702.8	6694.58	23135.4	108691	4379.87
D7	16	27021.6	4386.36	22630	111150	2228.49
D8	16	29044.8	6582.4	24321.6	118795	2274.94
D9	16	35970.1	6764.67	20330.3	101282	3366.88
D10	16	41635.7	7802.35	25438.5	132439	3870.39
D11	16	42018.1	8853.32	26779.6	148468	3298.66
D12	16	136821	17979.7	27053.8	135252	7252.04
E1	16	45246.9	6774.5	21494.5	132600	4210.12
E2	16	41410.9	6990.28	21157.8	118033	3722.18
E3	16	67717.5	7643.91	24148.4	126267	4847.9
E4	16	33262.7	5752.35	24541.8	128079	2932.62
E5	16	29024.4	4827.32	21627.6	108424	2749.93
E6	16	28838.5	5026.53	21929.6	108429	3312.15
E7	16	40896.5	6821.31	24710.2	117493	5744.53
E8	16	35948.7	6783.86	26188.6	127846	3773.54
E9	16	32923.2	7260.16	24028.7	104750	2524.69
E10	16	35863.1	6290.93	24870.4	136428	3840.47
E11	16	52867	10387	26525.9	140153	6618.17
E12	16	53967.3	8826.54	21926.8	127312	5101.02
F1	16	52467.1	9363.8	25813.4	153805	9520.54
F2	16	44552.2	7048.82	21258.7	121537	3234.41
F3	16	31791.7	5129.05	22966.4	130398	2964.23
F4	16	33856.9	5525.37	24049.6	126552	2989.85
F5	16	28879	4727.36	22341.2	115146	2490.35
F6	16	57252.2	10361.6	27112.6	120978	6868.2
F7	16	28935	4848.88	23882.4	120896	3669.63
F8	16	31230	5114.44	24475.1	125159	2616.77
F9	16	29211.2	4758.62	19679	104553	3296.81
F10	16	34728.8	6075.3	24370.4	137500	3904.96
F11	16	31515.8	5052.58	22615.9	136216	2723.2
F12	16	52387.4	8894.44	21485.9	125761	5498.64
G1	16	42865.8	6618.73	22651.5	148509	3777.5
G2	16	46517.2	7417.78	19087.8	110376	2874.9
G3	16	37185	6501.59	24623.2	138260	3188.1
G4	16	31037.9	5240.78	22735.3	125705	2718.2
G5	16	27431	4805.94	21266.6	114032	2806.73
G6	16	28159.3	4903.94	21407.9	111739	2341.45
G7	16	29654.8	5297.07	21478.7	113570	2544.47
G8	16	36041.1	6900.82	25826.5	136235	4088.52
G9	16	32865.4	5394.76	20627.6	114868	2467.71
G10	16	37535.3	7438.34	24228.3	132563	2773.83
G11	16	79357.9	13267.3	27351.9	145633	8579.9
G12	16	41512.5	6468.16	20589.1	133091	3063.87
H1	16	60239.6	10121.3	23094	147270	7925
H2	16	40524.8	6858.03	20635	129554	3427.13
H3	16	38038.2	7003.41	24236.8	142718	5165.26
H4	16	34707.7	6686.25	23515.8	129852	2750.18
H5	16	31096.4	5635.6	22872.7	128141	2672.34
H6	16	36429	6467.46	23652.1	125328	3468.96
H7	16	33112.3	9270.99	25593.1	129127	2553.51
H8	16	36924.6	6621.56	23579.7	129419	2819.18
H9	16	32300.4	5788.53	20074.5	114894	2747.46
H10	16	46954.9	12096	26321.1	139313	5279.65
H11	16	40870.5	7720.85	22246.3	139495	3102.91
H12	16	51994.4	8227.08	18844.9	124687	2792.88
A1	17	19705.7	3933.47	14142.4	100200	2411.76
A2	17	31408.3	4459.75	16217.5	103702	2730.57
A3	17	27840	5893.18	18032.6	104172	2394.36
A4	17	35557.3	5525.37	18227.5	102658	2772.53
A5	17	30312.7	4987.64	18833.8	104213	2897.65
A6	17	46147.5	7966.42	22375.4	113078	4706.99
A7	17	32157.7	5292.69	18507.7	100646	2690.7
A8	17	165179	26441.4	68095.5	357672	12827.3
A9	17	41609.1	6101.46	19566.8	110651	2918.34
A10	17	33554.3	6210.62	21334.5	129171	3705.67
A11	17	33613.6	5176.01	20637.9	138439	3367.25
A12	17	34058.8	5172.22	16849.7	121662	3740.94
B1	17	36907.5	5922.06	19766.8	131074	3403.72
B2	17	37942.8	5964.24	19462.8	115180	2711.86
B3	17	27704.3	4548.58	19390.5	111763	2588.85
B4	17	32046.1	5966.17	20457.5	112085	3176.94
B5	17	29216.2	4486.5	20983.4	119078	3627.43
B6	17	26930.5	4077.99	19597.9	103632	2008.22
B7	17	28056.8	4563.93	20249.4	106644	2378
B8	17	106790	14435.7	62403.4	342400	8680.38
B9	17	33559.1	5633.82	19436.7	105882	2662.68
B10	17	40778.7	6341.6	23040.5	133441	2772.3
B11	17	43097.3	6944.68	23557.8	145031	3964.05
B12	17	41412.6	7147.71	20335.9	132861	4628.64
C1	17	40276.9	6870.14	20988.6	132314	3887.01
C2	17	40353.4	6072.09	26563.4	162120	4380.51
C3	17	39152.8	5496.61	20449.8	115173	2091.34
C4	17	30869.7	4887.05	21242.8	111753	3320.29
C5	17	31112.6	5100.05	19990.3	100562	3405.35
C6	17	28556.4	4655.72	20452.9	102354	2570.48
C7	17	30744.8	5082.12	22531.6	113372	2188.28
C8	17	33502.6	4828.79	22230.5	113259	2360.28
C9	17	31543.5	6487.6	19520.3	98374	2378.11
C10	17	33717	6404.45	23061.7	127678	2856.18
C11	17	36665	7370.84	24503.9	148230	2456.23
C12	17	40463.8	6334.38	19435	123792	2703.99
D1	17	45032.5	7286.13	22348.5	136973	3068.08
D2	17	32979.9	5108.9	20799.9	121569	3012.55
D3	17	35384.5	6340.75	23522.5	124722	3479.18
D4	17	31546.5	5565.75	23175.9	118589	3605.77
D5	17	33999	5641.62	21931.5	107820	2231.85
D6	17	37844.5	6631.51	23033	108423	4711.04
D7	17	27197.5	4558.18	22454.7	111239	2284.98
D8	17	28786.4	6737.17	24440.8	118742	2200.35
D9	17	35665.5	6908.77	20163.3	100930	3136.36
D10	17	41926.8	7639.17	25431.8	132242	3878.13
D11	17	42264.7	8771.41	26766.2	148081	3638.53
D12	17	136707	17704.7	26876.9	134789	7159.63
E1	17	45342.9	6467.82	21421.5	132988	4323.4
E2	17	41691.3	6794.21	21069.3	118190	3865.06
E3	17	67789.7	7869.77	24051.4	126358	4899.66
E4	17	33071.8	5676.74	24659.1	128012	2808.67
E5	17	29009	5066.17	21590.8	107840	3131.97
E6	17	28670	4935.86	22009.6	108017	2948.2
E7	17	40781.3	6968.64	24705.5	117265	5233.31
E8	17	36144.1	6637.66	26217.8	127912	4177.57
E9	17	33104.4	7466.29	23908.1	104438	2455.49
E10	17	35710.2	6472.17	25085.3	136141	3206.05
E11	17	53110.6	10230.9	26402.5	140101	6227.23
E12	17	53778.5	9094.88	21851.1	127286	5154.9
F1	17	52597.7	9788.33	25859.1	153312	9311.3
F2	17	44055.9	6754.16	21174.9	121068	3512.37
F3	17	31626.4	5193.46	23063.8	130279	3017.39
F4	17	33552.5	5739.85	23824.7	126055	3167.26
F5	17	29173.4	4601.03	22295.5	115200	2427.6
F6	17	56935	10261.9	26877.4	120675	6762.18
F7	17	29206.9	4824.72	23822.8	120686	3664.68
F8	17	30974.4	5350.68	24260.3	125292	2701.72
F9	17	29197.6	4738.5	19629.3	104193	3142.82
F10	17	34638.2	5704.73	24395.3	137128	4148.69
F11	17	31385.5	5067.68	22583.2	135984	2667.48
F12	17	52367.2	8988.82	21485.9	125869	5439.89
G1	17	42839.5	6796.28	22503.6	148381	4378.09
G2	17	46785.4	7330.25	18986.2	110109	3170.27
G3	17	37301.9	6435.25	24401.4	138447	3125.23
G4	17	31383.2	5212.54	22727.3	125466	2931.37
G5	17	27164.6	4737.81	21080.6	113814	2650.54
G6	17	28036.1	4887.37	21455.5	111595	2625.85
G7	17	29580.5	5115.35	21654.2	113270	2502.9
G8	17	36117.1	6887.72	25685	135771	3732.41
G9	17	32949.3	5260.22	20714.5	114819	2289.88
G10	17	37681.9	7474.16	24128	132346	2999.1
G11	17	79227	13566.8	27287.7	145413	8250.83
G12	17	41582	6564.01	20556.1	132713	2906.45
H1	17	59996.7	10235.2	23079.9	146632	8110.99
H2	17	40887.3	6809.6	20629.1	129660	3453.64
H3	17	37920.7	6848.84	24224.5	142122	5024.34
H4	17	34538.3	6746.45	23253.2	129704	2835.43
H5	17	30764.7	5685.36	22928.2	127696	2580.76
H6	17	36446.2	6322.66	23461.5	125137	3618.09
H7	17	33187.2	9385.03	25663.1	128782	2600.34
H8	17	36786	6773.98	23320	129012	2977.83
H9	17	32289.2	5818.33	20195.2	115075	2445.59
H10	17	47184.5	11810.9	26224.4	139014	5347.38
H11	17	40479.7	7571.4	22272.6	139150	2873.94
H12	17	52625.7	8511.34	18772.9	124190	3114.81
A1	18	20006.3	4124.37	14257.1	100039	2629.44
A2	18	31293.5	4850.01	15943.2	103272	2756.87
A3	18	27854.6	6130.5	18099.7	104074	2014.27
A4	18	35437	5483.89	18381.5	102568	3068.15
A5	18	30344.3	4835.28	18646.3	104250	2939.88
A6	18	46036.4	8270.74	22322.8	113039	4791.73
A7	18	32072	5235.89	18446	100468	2463.96
A8	18	164904	26017.4	68319.9	356802	14261.8
A9	18	41953.4	6024.17	19647.3	110257	2932.19
A10	18	33311.7	5857.32	21250.6	129197	3678.04
A11	18	34226.2	5245.46	20591.7	137948	3407.9
A12	18	33648.4	5048.72	16913.7	121603	3446.61
B1	18	36986.4	5792.45	19750.4	130445	3633.79
B2	18	37954.3	5818.51	19205.2	115085	3123.65
B3	18	27863	4767.06	19418.2	111382	2363.48
B4	18	31801.5	6074.93	20455.2	111782	2828.62
B5	18	29653.2	4647.04	20978.7	118957	3777.06
B6	18	26890.8	3993.98	19476.9	103140	2133.33
B7	18	27893	4476.51	20131.7	106764	2262.6
B8	18	105954	14934.7	62167	341032	8188.63
B9	18	33565.8	5483.18	19341.3	105903	2519.92
B10	18	40604.4	6699.13	22987.8	132997	2808.83
B11	18	42893.8	7029.9	23533.6	145152	3691.54
B12	18	41535.9	6976.36	20326.2	132521	4568.2
C1	18	40350.8	6659.09	21116.5	131871	3699.73
C2	18	40164.7	6053.37	26439.9	161544	4320.97
C3	18	39390.3	5803.07	20695.9	114814	2432.21
C4	18	31283.3	4957.1	21088.8	111980	3410.99
C5	18	30927.5	5062.5	19809.6	100672	2995.11
C6	18	28751.3	4561.03	20320.2	101820	2414.09
C7	18	30618.3	4826.47	22610.1	113676	2129.74
C8	18	33313.2	5066.85	22235.1	112983	2549.93
C9	18	31278.6	6565.87	19381.1	98520.2	2167.48
C10	18	33747.7	6374.11	22940.7	127665	2506.12
C11	18	36419.9	7641.93	24575.9	147907	2476.11
C12	18	39884.8	6159.78	19205.7	123381	2896.03
D1	18	45055.7	7104.9	22485.4	136840	3280.64
D2	18	32829.1	5256.35	20790.9	121991	2655.82
D3	18	35524.7	6079.44	23395.6	124564	3255.87
D4	18	31314.6	5795.87	23239.5	118609	3569.82
D5	18	33952.5	5692.64	21946.4	107609	2130
D6	18	37942.9	6387.02	22976.3	108257	4547.28
D7	18	27307.5	4662.66	22669.3	111313	2151.05
D8	18	29188.5	6598.32	24479.9	118828	2578.89
D9	18	35850.5	6771.75	20217.1	101029	3119.14
D10	18	41553.2	7771.4	25287.1	132371	4072.62
D11	18	42357.8	8783.85	26571.4	148222	3449.83
D12	18	135943	17903.6	26740.7	134967	7301.73
E1	18	45121.9	6790.58	21437.8	132358	4108.38
E2	18	41420.5	6841.87	20979.7	117982	3845.25
E3	18	67514.1	7920.89	23963.7	126031	4940.12
E4	18	33058	5735.45	24566.5	128095	2878.16
E5	18	29073.9	5027.24	21658.1	107867	2940.01
E6	18	28436.4	5042.07	21998.7	108191	3214.97
E7	18	40758.6	6952.57	24760.1	117133	5324.2
E8	18	35882.1	6385.87	26006.7	127774	4080.64
E9	18	33051.2	7443.39	23841.8	104434	2524.69
E10	18	35820.3	6348.68	24806.3	136255	3484.24
E11	18	53000	10179.8	26380.5	140077	6295.1
E12	18	53635.5	8829.89	21849.5	127234	5110.13
F1	18	52740.2	9545.33	25829.1	153363	9280.68
F2	18	44399.7	7001.64	21005.2	121128	3376.46
F3	18	31536.8	5138.89	22823.8	130243	3198.49
F4	18	33859.3	5540.45	23837.5	126009	2962.89
F5	18	28909.2	4733.02	21986.1	114877	2378.42
F6	18	56873.4	10274.7	26949.9	120540	6745.44
F7	18	29199.7	4986.06	23694.6	120629	3470.93
F8	18	31454	5151.98	24239.3	125265	2469.15
F9	18	29343.7	4720.8	19530	104119	3349.56
F10	18	34682.7	5969.91	24333.6	137238	4179.26
F11	18	31249	4874.51	22557.5	135325	2502.32
F12	18	52124.5	8955.36	21308.2	125258	5511.88
G1	18	43184.6	6866.74	22447.8	147796	4305.91
G2	18	46831.9	7196.58	18939.8	109974	3455.79
G3	18	37301	6567.93	24396.1	138286	3138.51
G4	18	31194.5	5161.7	22732.1	125394	2643.05
G5	18	27364.5	4763.36	21134.3	113566	2802
G6	18	28339.8	4961.55	21525.9	111748	2617.66
G7	18	29794.2	5208.85	21660.3	112926	2394.66
G8	18	36225.3	7157.13	25732.5	135721	3884.18
G9	18	32799.3	5499.32	20470.3	114799	2400.26
G10	18	37735.5	7593.27	23907.6	132202	2877.31
G11	18	78762.4	13231.3	27099.3	145083	8147.31
G12	18	41138	6493.64	20298.8	132682	2728.51
H1	18	59634.3	10066.2	22957	146094	8554.28
H2	18	40310	6777.74	20594	129563	3590.82
H3	18	37687.8	6730.2	24048.9	142013	4841.98
H4	18	34377.8	6668.1	23194.2	129492	2766.42
H5	18	30758	5475.01	22768.3	127455	2477.92
H6	18	36326.3	6438.5	23371.5	125122	3725.93
H7	18	33171.5	9451.09	25420.4	128488	2759.09
H8	18	36702.8	6824.33	23406.1	128856	2814.9
H9	18	32140.2	5733.33	20280.6	115125	2639.84
H10	18	46743.6	12267.2	26119.9	138797	5223.88
H11	18	40626.8	8035.84	22339.4	139433	3139
H12	18	52475.3	8397.34	18819.1	124003	2962.31
A1	19	20276.9	3794.49	14302.7	99552.4	2687.11
A2	19	31540.1	4832.2	16133.2	103593	2675.21
A3	19	28546.9	6077.92	18187.2	103978	2175.56
A4	19	34876.4	5309.89	18309.6	102340	2738.75
A5	19	30614.9	4665.42	18716.7	104232	3121.6
A6	19	46067.2	8024.79	22218.6	112579	4836.72
A7	19	32031.3	5133.85	18293.3	100390	2482.85
A8	19	165353	25835.3	68101.4	355956	12845.7
A9	19	41856.7	6454.33	19483.4	110490	2711.66
A10	19	33480.8	6089.07	21218.1	128920	4051.59
A11	19	34197.6	4996.42	20699.3	138015	3332.4
A12	19	33723.2	4713.92	17018	121510	3375.52
B1	19	36742.9	5947.98	19723.1	130628	3593.19
B2	19	37780.4	5961.26	19179.7	115217	3240.93
B3	19	27702.9	4507.69	19582.3	111446	2476.76
B4	19	31649.3	6270.93	20144.4	111887	2798.42
B5	19	29669.7	4502.66	21069.3	118547	3381.26
B6	19	26864.9	4041.86	19533.2	103298	2058.08
B7	19	27925.6	4648.72	20100.9	106511	2550.2
B8	19	107343	14554.4	61972.8	341552	7669.4
B9	19	33703.8	5815.5	19497.4	106039	2425.98
B10	19	40725.3	6390.99	23100.1	132603	2818.7
B11	19	43129.2	6808.1	23553.2	144254	3987.14
B12	19	40995.5	7118.92	20548.6	132237	4760.77
C1	19	40901.8	6397.73	21050.8	132077	4119.16
C2	19	39680.9	6303.54	26490.7	162104	4098.12
C3	19	39383.3	5807.69	20512.5	115066	2150.96
C4	19	31149	4922.61	21181.9	112172	2997.44
C5	19	31296.7	5252.24	19953.1	100257	2985.08
C6	19	28854.7	4703.9	20328	102054	2429.64
C7	19	32417.4	5148.02	22618.5	113430	2105.83
C8	19	33560.6	5044.34	22127.1	112643	2580.49
C9	19	31542.7	6769.37	19336.7	98474.5	2555.43
C10	19	33611.2	6189.14	22947.7	127087	2703.03
C11	19	36255.3	7499.83	24500.7	147350	2405.43
C12	19	39911.7	6039.81	19344	123457	2688.58
D1	19	45382.4	7590.64	22286.5	136949	3268.14
D2	19	32735.2	5387.67	20648.6	121826	2810.11
D3	19	35474.9	6295.44	23391.3	124529	3112.62
D4	19	31516.7	5650.64	23284	118991	3927.22
D5	19	33630.7	5594.38	21814	107619	2153.96
D6	19	37784.4	6457.86	22977.2	108314	4158.78
D7	19	27007.2	4580.63	22609	111446	2263.11
D8	19	29331.3	6747.78	24385.8	118836	2463.28
D9	19	35456.2	7016.63	20073.3	100472	3325.75
D10	19	41927.8	7902.69	25391.5	132384	4233.24
D11	19	42239.3	8839.84	26712.6	148267	3397.7
D12	19	134916	17632.6	26755.8	134106	7017.53
E1	19	45236	6468.97	21584	132671	4189.15
E2	19	41347.5	6836.45	20957.6	118055	3568.87
E3	19	67631.9	7499.84	23872.3	126528	4710.52
E4	19	33176.3	5677.63	24456.5	128149	2955.16
E5	19	28994.4	5016.63	21455.3	107544	3056.32
E6	19	28614.3	5094.74	21956.9	108493	3000.46
E7	19	40949.2	6917.75	24650.9	116959	5184.09
E8	19	36056	6721.59	25939.8	127613	4076.81
E9	19	32904.9	7471.57	23939.8	104347	2484.48
E10	19	36075.4	6323.8	24790.1	136300	3327.25
E11	19	52980.4	10173.1	26249.4	139807	6327.59
E12	19	53800.1	9154.23	21808.8	127131	4890.44
F1	19	52808.4	9621.09	25716.5	152869	9458.02
F2	19	44518.8	7154.73	21220.3	121257	3188.42
F3	19	31512.4	5341.08	22987.6	129967	2651.59
F4	19	33718.2	5538.78	24009.6	126031	3119.43
F5	19	28950	4799.42	22145.8	115288	2293.63
F6	19	56616.4	10222.6	26796.4	120271	6452.89
F7	19	29321.2	5035.17	23876	120503	3611.09
F8	19	31408.5	5345.2	24231.2	125011	2729.76
F9	19	29279.7	4738.5	19576.4	103710	3187.91
F10	19	34862.9	5857.72	24343	136983	4358.35
F11	19	31267.6	5278.95	22530.8	135506	2400.83
F12	19	52369.1	9048.87	21363.9	125063	5329.83
G1	19	43077.8	6923.1	22224.7	147783	3822.61
G2	19	46628	7222.6	19077.9	109908	2995.24
G3	19	37561.6	6311.65	24307.6	137839	3082.72
G4	19	31709.6	5185.1	22702.4	125665	2808.04
G5	19	27423.6	4619.34	21061.9	113580	2599.26
G6	19	28237.2	4896.01	21315.5	111519	2438.98
G7	19	30095	5357.4	21625.1	113060	2449.57
G8	19	36643.8	7098.99	25758.3	135468	3903.68
G9	19	33366.2	5321.06	20490.1	114616	2198.78
G10	19	37816.3	7385.5	23918.4	132232	2955.15
G11	19	78462.3	13215.5	27085.1	144555	8142.95
G12	19	41455	6605.26	20326.1	133025	2530.03
H1	19	59767.3	10021.7	23135	145957	8225.69
H2	19	40440.3	6711.46	20507.5	128980	3636.93
H3	19	37775.1	6534.27	24058.2	141960	4794.31
H4	19	34433.7	6402.57	23230.9	129666	2905.26
H5	19	30868.8	5540.6	22746.9	127228	2655.82
H6	19	36229.6	6488.8	23458.5	124532	3533.21
H7	19	32996.3	9456.6	25456.2	128303	2905.14
H8	19	36702.8	6665.61	23336	128788	2640.53
H9	19	32212.1	6011.98	20078.8	115185	2668.71
H10	19	46268.1	11843.1	26149.2	138955	5244.79
H11	19	40333.7	7475.98	22166.4	139604	2960.79
H12	19	52592.7	8657.91	18686	123859	3247.53
A1	20	20244.9	4072.46	14211.5	99575.7	3227.7
A2	20	31803.6	4735.04	15647.5	103305	2611.55
A3	20	28789.7	6215.76	18103.8	103436	2049.27
A4	20	35273.1	5465.45	18217.2	102342	3157.9
A5	20	30473.9	4985.58	18639	103922	2834.78
A6	20	45772.2	8020.62	22089.6	112489	4833.58
A7	20	32676.1	5225.3	18486.2	99822.5	2639.68
A8	20	165648	25220.5	67897.4	356525	13317.7
A9	20	41763.4	6498.05	19413.1	110249	2758.14
A10	20	33865.1	6182.22	21288.6	129135	3680.25
A11	20	34053	5277.79	20518.8	137692	3392.8
A12	20	34139.1	4812.13	16894.2	121253	3270.3
B1	20	37085.2	6099.52	19535.7	130202	4007.66
B2	20	37983.8	5808.1	19302.8	114892	2947.73
B3	20	27689.2	4829.67	19395.5	111325	2291.5
B4	20	32137.4	6140.64	20354.3	112079	3234.09
B5	20	29227.2	4519.9	20896.3	118673	3609.33
B6	20	26691.2	4185.5	19455.4	102886	2341.86
B7	20	27926.5	4574.42	20101.8	106206	2370.01
B8	20	108094	14613.7	61798.3	341061	7312.04
B9	20	33660.7	5578.13	19489	105995	2596.37
B10	20	40164.9	6398.89	22908.4	132701	2699.24
B11	20	42852.9	6827.95	23579.6	143653	3674.22
B12	20	41443.4	7054.12	20334.5	132255	4489.49
C1	20	40712.7	6937.63	21071.6	131473	3908.32
C2	20	40744.6	6238.87	26548.2	162104	4142.35
C3	20	39683.4	5438.78	20637.9	114850	2144.21
C4	20	31374.3	4896.75	20866.2	111545	2941.29
C5	20	30999.8	5268.05	19741.4	100461	3307.06
C6	20	28833	4639.94	20388.3	101730	2707
C7	20	31758.6	5397.33	22720.4	113473	2364.73
C8	20	33430.9	4997.59	22032.8	112646	2627.22
C9	20	31686.2	6671.1	19486	98553.1	2425.81
C10	20	33725.9	6475.89	22824.8	126648	3046.13
C11	20	36676.4	7182.83	24337.2	146986	2492.68
C12	20	40275.1	6359.32	19102	122784	2846.24
D1	20	45643.9	7343.03	22363.5	136420	3387.4
D2	20	32738.6	5143.46	20872.7	121812	2929.39
D3	20	35672.1	6122.64	23487.6	124660	3440.21
D4	20	31679.3	5549.39	23186.5	118369	3666.04
D5	20	33291.4	5424.31	21784.2	107145	2855.97
D6	20	37622.7	6342.96	22812.7	108153	4236.12
D7	20	27245.7	4576.32	22458.4	111388	1924.19
D8	20	29531.5	6586.82	24250.7	118487	2604.99
D9	20	36166.2	6674.5	19964.7	100298	3575.39
D10	20	41987.1	7817.35	25377.1	132149	3831.69
D11	20	42533.5	9054.46	26604.4	147306	3619.77
D12	20	134680	17450.2	26689.6	133765	7078.15
E1	20	45424.6	6614.84	21418.2	132050	4295.08
E2	20	41205.7	6900.37	21069.3	117830	3572
E3	20	67642.6	7720.13	23974.9	126310	4375.53
E4	20	32767.6	5679.41	24533.5	128044	2438.69
E5	20	28876.1	4868.01	21458	107089	2739.53
E6	20	28382.3	4955.72	22068.8	108280	3288.31
E7	20	41139.9	6997.22	24696.1	117092	5219.11
E8	20	36243.9	6633.15	26104.7	127647	3989.47
E9	20	33567.5	7272.5	23693.1	104333	2380.69
E10	20	36232.6	6351.34	24829.8	136314	3257.47
E11	20	52969.7	10387.9	26360.4	139489	6496.78
E12	20	54089.7	8910.13	21672.1	126726	5060.39
F1	20	52467.1	9422.41	25592.2	152756	9267.92
F2	20	44387.1	6909.36	21226.4	121258	3105.65
F3	20	31581.1	5085.21	22901.7	129479	3115.6
F4	20	33523.2	5823.63	23961	125832	3221.18
F5	20	28928.9	4942.75	22113.4	114646	2344.51
F6	20	56460.6	10223.3	26722.4	119997	6629.85
F7	20	29731.9	4961.9	23762.3	120433	3628.4
F8	20	31924.8	5404.65	24272.4	125031	2438.64
F9	20	29612.6	4875.29	19582.2	103644	3124.96
F10	20	35073.4	5910.41	24374.7	136700	4099.77
F11	20	31592.4	4943.93	22456.6	135222	2373.97
F12	20	52109.8	8867.84	21420.4	124973	5241.29
G1	20	43142.2	6831.51	22367.4	147431	3841.94
G2	20	46759.2	7834.15	18957.5	109867	2997.42
G3	20	37633.6	6412.53	24383.7	137624	2910.91
G4	20	31379.2	5262.56	22762.6	125363	2714.93
G5	20	27100.4	4721.55	20971.6	112736	2647.38
G6	20	28134.7	4984.6	21325.8	111192	2184.36
G7	20	30775.2	5316.68	21605.2	112853	2455.06
G8	20	37722.5	7185.79	25695.9	135272	3785.82
G9	20	34110.3	5283.36	20730.8	114629	2462.45
G10	20	38141.1	7664.91	23919.3	132192	3227.13
G11	20	78155.3	13271.8	27060.1	144249	8261.73
G12	20	42048.8	6357.74	20380.7	132191	3191.62
H1	20	59337.4	10196.1	22875	145076	8588.38
H2	20	40127.5	6860.58	20666.6	129131	3573.53
H3	20	37887.2	6689.92	24091	141674	4980.82
H4	20	34473.4	6478.44	23117.5	129281	2971.85
H5	20	30804.9	5643.14	22814.2	126715	2614.53
H6	20	36087.3	6492.61	23230.4	124500	3570.68
H7	20	33007.5	9651.65	25382.3	127659	2677.34
H8	20	36696	6545.34	23261	128244	2874.21
H9	20	32102.1	5810.44	20164.1	115017	2751.83
H10	20	46129.9	11815.9	26059.3	138782	5278.66
H11	20	40823.5	7640.38	22193.8	139440	3242.77
H12	20	52541.4	8410.66	18476.9	123871	3174.11
A1	21	21049.1	3945.19	14128.2	99502.6	2499.7
A2	21	32453.1	4979.56	15813	103416	2361.05
A3	21	29517.8	6167.44	18020.3	103839	2565.66
A4	21	35341	5413.6	18169.3	102369	2963.63
A5	21	30292.4	5114.26	18714.7	103751	2888.81
A6	21	45303.3	8198.83	22210	112352	4843
A7	21	32664.3	5059.73	18439.2	99781.7	2607.56
A8	21	166508	25115.2	67949.8	355205	13762.2
A9	21	41976.4	6240.78	19608.6	109940	3102.29
A10	21	33768	6043.63	21180	128691	3722.25
A11	21	34519.6	5281.38	20374.2	137279	3643.69
A12	21	34396.3	4984.73	16627.2	120898	3762.27
B1	21	37550.3	5622.97	19672.2	130191	3931.53
B2	21	38220	6352.34	19219.3	114600	3167.96
B3	21	27861.7	4680.18	19298.3	110833	2472.04
B4	21	32139.7	6149.71	20306.1	111577	3036.75
B5	21	29396.7	4588.86	21123.5	118449	3674.49
B6	21	26697.7	3996.69	19322.3	102942	2125.17
B7	21	28323.9	4286.82	20117.2	105845	2553.75
B8	21	107906	16005.5	61705.4	340351	7904.58
B9	21	34209.5	5652.99	19230.9	105655	2213.22
B10	21	40494.3	6667.52	22906.4	132553	2890.78
B11	21	42991.1	7010.06	23342.9	143757	3606.1
B12	21	41511.6	7175.07	20189.4	131815	4575.23
C1	21	40842.9	6705.72	20890.7	131746	3645.9
C2	21	40785.7	6141.87	26522.8	162051	4239.32
C3	21	40058.8	5482.73	20796.9	115231	2276.96
C4	21	30956.5	4754.5	21060	111793	3121.61
C5	21	31111.7	5108.95	19737.3	100119	3142.56
C6	21	29114.5	4576.81	20352.5	101305	2506.54
C7	21	32179.8	5161.52	22645.2	113113	1824.67
C8	21	34022.9	5325.69	22039.1	112261	2460.05
C9	21	32133.7	6646.75	19299.7	98215	2348.4
C10	21	34155	6389.77	22904.8	126743	2504.13
C11	21	36620.8	7479.06	24121.4	146342	2441.87
C12	21	40153.1	6134.83	19248.3	122372	2660.13
D1	21	45436.4	7452.61	22210.6	136636	3485.5
D2	21	33373	5361.18	20781.9	121933	2218.11
D3	21	35714.8	6303.87	23390.3	124975	3259.03
D4	21	31380	5610.75	23153.6	118588	3881.75
D5	21	33714.2	5660.52	21716.5	107007	2615.31
D6	21	37538.7	6418.12	22868.4	108134	4035.05
D7	21	27970	4476.16	22388	111436	1950.61
D8	21	30013.3	6901.66	24250.7	118372	2291.72
D9	21	36030.8	6987.45	20081.7	100241	3367.83
D10	21	42287.5	7836.11	25190.3	131783	3818.14
D11	21	42813.9	9001.58	26642.5	147412	3383.11
D12	21	134737	17603.3	26585.6	133706	6768.11
E1	21	45328.5	6760.72	21428	131857	4074.82
E2	21	41635.2	6810.46	20904.8	117825	3933.89
E3	21	67816.4	7666.22	23947.9	125862	4504.45
E4	21	32858.1	5731	24487.7	128245	2947.65
E5	21	29174.4	5112.17	21435	107361	2867.19
E6	21	28469.3	4753.66	21917.8	108190	3088.46
E7	21	41459.5	6840.95	24653.7	117322	5373.42
E8	21	36928.5	6761.3	26055.7	127904	4073.93
E9	21	33581.6	7239.9	23740.2	104020	2575.18
E10	21	36275.4	6424.19	24848.8	136360	3450.27
E11	21	52914.9	10134.5	26110.6	139331	6262.6
E12	21	53971.6	8909.3	21731.5	126439	5004.02
F1	21	52726.8	9599.65	25606.6	152382	9480.99
F2	21	44312.9	6955.5	20936.5	120611	3474.56
F3	21	31956.1	5191.67	22925.6	129785	2662.4
F4	21	33640.5	5625.91	23847.7	125643	3055.08
F5	21	29175.7	4990.53	22194	114638	2263.11
F6	21	56102.5	10103.2	26609.5	119891	6656.96
F7	21	30274.2	5103.76	23813.1	120336	3433.01
F8	21	32439.7	5329.56	24110.9	124709	2483.17
F9	21	30433.7	5041.04	19472.1	103290	3405.72
F10	21	34961.9	5803.32	24301	136470	4060.46
F11	21	32067.1	5097.86	22445.7	135132	2449.58
F12	21	52733.7	9214.46	21274.6	124723	5053.45
G1	21	43510.6	7307.8	22254.5	147321	3433.39
[truncated: 10,295 more rows]

## Sheet: Multicomponent Data
Block Type	96alum
Chemistry	SYBR_GREEN
Experiment File Name	D:\ShuJu\LZM\13-16 spx iaa +lp.eds
Experiment Run End Time	2023-08-17 08:06:49 AM CST
Instrument Type	sds7500
Passive Reference	ROX
Well	Cycle	SYBR	ROX
A1	1	19693.8	103809
A2	1	32075.1	109632
A3	1	27938.3	109870
A4	1	36063.8	107009
A5	1	30971.9	110895
A6	1	46182.9	121080
A7	1	33473.2	108877
A8	1	178249	388460
A9	1	42993.6	119229
A10	1	33620.7	136108
A11	1	33542.4	140571
A12	1	33907.4	128117
B1	1	36971.6	137836
B2	1	39844.9	121467
B3	1	28018	118593
B4	1	31676	117189
B5	1	30212.7	128802
B6	1	26030.8	109721
B7	1	28215.9	114253
B8	1	110978	370553
B9	1	35022.1	113839
B10	1	42946.7	145558
B11	1	45002.1	154478
B12	1	42033.3	139409
C1	1	40946.3	137486
C2	1	40444.3	170815
C3	1	38536.8	121815
C4	1	30909.2	116832
C5	1	31615.7	108923
C6	1	28294.5	108832
C7	1	31849	120180
C8	1	34505.2	123707
C9	1	33475	106724
C10	1	34903.5	141305
C11	1	36117.1	158733
C12	1	42052.7	132128
D1	1	46404.7	144594
D2	1	33571.2	126835
D3	1	35862.9	130323
D4	1	31645.4	124506
D5	1	33794.7	117107
D6	1	37855.7	114776
D7	1	27507.4	119132
D8	1	28673.8	127789
D9	1	39714.7	110839
D10	1	43995.2	141911
D11	1	43423.9	156634
D12	1	149359	143714
E1	1	45775.9	139203
E2	1	43795.6	124510
E3	1	71408.5	132689
E4	1	33217.4	135457
E5	1	28396.9	117379
E6	1	29183.8	115482
E7	1	42103.8	124055
E8	1	36703.1	136843
E9	1	33948	112659
E10	1	36835.4	145607
E11	1	60276.6	152972
E12	1	57144.4	133679
F1	1	54107.8	160217
F2	1	46558	128479
F3	1	31554.5	136701
F4	1	33872.2	133203
F5	1	28848	124047
F6	1	55684.3	129622
F7	1	28866.6	128133
F8	1	30994.2	132815
F9	1	29185	113023
F10	1	35472.7	146133
F11	1	31826.5	146813
F12	1	53017.2	132987
G1	1	43518.2	156026
G2	1	48715.4	116510
G3	1	38880.7	148473
G4	1	31303.8	132416
G5	1	27476.2	123977
G6	1	28613.5	120529
G7	1	29120.7	124053
G8	1	36640.2	147528
G9	1	34117.4	123172
G10	1	38130.4	140199
G11	1	84626.8	156048
G12	1	41668.5	140834
H1	1	60677.3	155139
H2	1	41482.2	135684
H3	1	38704.4	149343
H4	1	34490.5	137249
H5	1	31701.2	138059
H6	1	37810.7	134660
H7	1	33289.6	140005
H8	1	38063.2	139250
H9	1	32922.6	120933
H10	1	50812.7	147733
H11	1	40064.8	138687
H12	1	50491.9	129049
A1	2	19781.5	103574
A2	2	32615.6	109121
A3	2	28230.4	109423
A4	2	36135.9	106361
A5	2	31380.7	111047
A6	2	47434.9	120302
A7	2	33319.3	109126
A8	2	178204	385115
A9	2	43081.8	118297
A10	2	33987.3	135874
A11	2	33884.8	141413
A12	2	33687	128996
B1	2	37348.2	136503
B2	2	39379.6	119569
B3	2	28278.3	116485
B4	2	31918.8	116219
B5	2	30053.9	127223
B6	2	26117.7	108826
B7	2	28071.9	112263
B8	2	110562	364881
B9	2	34635.8	110692
B10	2	42759.3	141824
B11	2	45031	152560
B12	2	42328.3	139553
C1	2	41033.7	137180
C2	2	40331	167701
C3	2	38327.6	120163
C4	2	30855.4	115907
C5	2	31883.1	107311
C6	2	28401.9	107763
C7	2	31381	118854
C8	2	34177.6	121128
C9	2	33237.6	102887
C10	2	34931.9	138122
C11	2	36056.2	156433
C12	2	42275.8	132576
D1	2	46262.3	143970
D2	2	32972.4	124428
D3	2	35428.1	128551
D4	2	31267.4	123287
D5	2	33999.5	114500
D6	2	38634.5	113476
D7	2	27597.9	115863
D8	2	28536.3	124634
D9	2	39175.5	108500
D10	2	43665.9	138353
D11	2	43513.6	155016
D12	2	149623	144436
E1	2	46729.7	139085
E2	2	42989.1	122719
E3	2	71368	131258
E4	2	33103.4	131606
E5	2	28947.3	115214
E6	2	29477.2	112727
E7	2	42178.4	122117
E8	2	36245.8	132898
E9	2	33959.8	111551
E10	2	36724	141916
E11	2	58525.1	148406
E12	2	57317.7	134298
F1	2	53735.4	160245
F2	2	45781.4	126340
F3	2	31932.2	135060
F4	2	34056	131112
F5	2	29123	120715
F6	2	56378.6	126865
F7	2	28855.6	126664
F8	2	30804.5	131659
F9	2	29413.3	111192
F10	2	35370.1	142652
F11	2	31780.6	143012
F12	2	53557.3	133637
G1	2	43811.8	155283
G2	2	48252.5	114508
G3	2	38460.2	145592
G4	2	31444.1	130783
G5	2	27625.6	121316
G6	2	28368.1	117454
G7	2	29302.3	120616
G8	2	36659	143864
G9	2	34041.6	119486
G10	2	38165.5	138204
G11	2	83784.4	152634
G12	2	41905.5	141573
H1	2	61173.6	154739
H2	2	41509.2	134937
H3	2	38253.1	148687
H4	2	34886.2	137121
H5	2	31988.3	138128
H6	2	37870.5	134577
H7	2	33489	139065
H8	2	38417.7	139059
H9	2	33038.6	120393
H10	2	50731.9	147195
H11	2	40128.6	139996
H12	2	51605.3	129625
A1	3	19893.9	104153
A2	3	32534.9	108655
A3	3	28229.6	108646
A4	3	36095.4	105842
A5	3	31461.4	110337
A6	3	47378.3	119400
A7	3	33663.6	107616
A8	3	178995	382231
A9	3	43062.2	116680
A10	3	33894.9	135480
A11	3	33819	141690
A12	3	34059.2	129008
B1	3	36992.3	136194
B2	3	39464.8	118241
B3	3	27957.3	115716
B4	3	31920.3	115250
B5	3	30454.4	126438
B6	3	25893.9	107766
B7	3	28458.9	111248
B8	3	110432	361331
B9	3	34619.1	109263
B10	3	42639.4	139312
B11	3	44806.4	151964
B12	3	42854.7	138931
C1	3	41303.1	136821
C2	3	40638.2	165888
C3	3	38685.1	119078
C4	3	31143.3	115083
C5	3	32181.3	106741
C6	3	28905.1	106804
C7	3	31491.4	117755
C8	3	34083.4	119366
C9	3	32570.1	102582
C10	3	34762	135866
C11	3	37004.2	155280
C12	3	42137.4	131555
D1	3	46301.1	142841
D2	3	33580	123966
D3	3	35933.5	127886
D4	3	31751.9	122229
D5	3	34142.6	113868
D6	3	39095.5	112659
D7	3	27802.4	114358
D8	3	28622.1	123171
D9	3	38418.4	106878
D10	3	43266.6	137067
D11	3	43392	154035
D12	3	149049	143177
E1	3	46208.3	138245
E2	3	42522.8	121904
E3	3	70901.5	130385
E4	3	33388.4	130472
E5	3	28904.5	114179
E6	3	29699.9	110939
E7	3	42042.9	121385
E8	3	36423.4	131435
E9	3	33689.8	110543
E10	3	36438	140076
E11	3	57685.2	146428
E12	3	57194	133639
F1	3	54338.1	159645
F2	3	45276.2	125420
F3	3	31488.2	134592
F4	3	34096.5	130395
F5	3	28971.6	119344
F6	3	56879.6	125712
F7	3	29068.6	125645
F8	3	30927.9	130503
F9	3	29214.9	110329
F10	3	35263	141777
F11	3	31578.1	141802
F12	3	53753.2	132325
G1	3	43914.1	154661
G2	3	47655.8	113983
G3	3	38468.2	144318
G4	3	31282.7	130236
G5	3	27558.8	120196
G6	3	28417.5	115985
G7	3	29357.9	118859
G8	3	36462.1	141515
G9	3	33643.8	118692
G10	3	38189	137410
G11	3	83010.6	151384
G12	3	42123.4	139992
H1	3	61158.6	154802
H2	3	41413.9	134523
H3	3	38638.9	148300
H4	3	34898.1	136808
H5	3	32241.1	137309
H6	3	37999.9	133737
H7	3	33961	138465
H8	3	38613.9	138299
H9	3	33159.3	119840
H10	3	51190	146311
H11	3	40421.5	140139
H12	3	51460.2	129368
A1	4	19826.9	104617
A2	4	32373.5	107681
A3	4	28313.4	107949
A4	4	36211.5	105935
A5	4	31370	109444
A6	4	47069.1	118458
A7	4	33322.2	106874
A8	4	177161	378679
A9	4	43001.5	115709
A10	4	34180.6	134540
A11	4	34308.5	141116
A12	4	34550.3	128698
B1	4	37977.1	136338
B2	4	39212.9	118390
B3	4	27904.3	115274
B4	4	32089.1	114679
B5	4	30360.9	125250
B6	4	25916.5	107135
B7	4	28157.8	110533
B8	4	108564	358926
B9	4	34231.8	108946
B10	4	42434.7	139139
B11	4	44991.2	150908
B12	4	42547.3	138539
C1	4	40871.7	135829
C2	4	40078.6	165179
C3	4	38785.2	118685
C4	4	31063.5	115154
C5	4	31918.5	106019
C6	4	28450	105865
C7	4	31812.1	117414
C8	4	34112.8	119107
C9	4	32265.3	101679
C10	4	34587.1	135108
C11	4	37316.9	154362
C12	4	42192.4	130456
D1	4	46218.6	142198
D2	4	33395.1	123563
D3	4	35712.8	127628
D4	4	31422.6	122339
D5	4	34051.5	113083
D6	4	39107	112530
D7	4	27559.5	113759
D8	4	28842.9	122133
D9	4	38159.9	105925
D10	4	43529.8	136695
D11	4	43108.2	153620
D12	4	148123	142634
E1	4	46354.4	137695
E2	4	42390.9	121301
E3	4	70508.5	130063
E4	4	33343.4	130513
E5	4	29092.2	113511
E6	4	29194	110436
E7	4	41826.4	120930
E8	4	36463	130984
E9	4	33584	109963
E10	4	36348.8	139841
E11	4	57361.6	145927
E12	4	57140.9	132822
F1	4	54747.3	158773
F2	4	45019	125133
F3	4	31688.3	133999
F4	4	33970.6	130075
F5	4	29118	118815
F6	4	57226.7	124681
F7	4	29363.2	124935
F8	4	31019.2	129909
F9	4	29112.8	109423
F10	4	35220.5	141219
F11	4	31078.3	141071
F12	4	53859.4	131968
G1	4	44241.1	153916
G2	4	47351.2	113180
G3	4	38150.4	143625
G4	4	31501.7	129718
G5	4	27509.8	119310
G6	4	28424.7	115587
G7	4	29710.2	118195
G8	4	36361	140802
G9	4	33723.9	118097
G10	4	38092.7	136776
G11	4	82313.3	150780
G12	4	42344.5	139701
H1	4	61687.7	154357
H2	4	41248.8	134215
H3	4	38661.7	147912
H4	4	35015.1	136019
H5	4	32183.7	136487
H6	4	38005.8	132854
H7	4	34083.3	136763
H8	4	38554.2	136930
H9	4	33416.2	119200
H10	4	50875.1	145293
H11	4	40754.4	140016
H12	4	51621.4	129132
A1	5	19893.9	103508
A2	5	32768.1	107124
A3	5	28505.2	107654
A4	5	36055.8	104990
A5	5	31118	108904
A6	5	47086.5	117964
A7	5	33573.9	106162
A8	5	176947	376121
A9	5	43028.3	115145
A10	5	33627	133958
A11	5	33993.9	141034
A12	5	34336	128004
B1	5	37200.4	135068
B2	5	38800.8	118072
B3	5	28047.6	114956
B4	5	31505.8	114688
B5	5	29699.9	124840
B6	5	26435.8	106501
B7	5	27924.8	110223
B8	5	108853	357739
B9	5	34451.1	109132
B10	5	42236.7	138397
B11	5	44326.2	151137
B12	5	42743.1	138325
C1	5	41032	135094
C2	5	40432.8	165050
C3	5	39010.9	118451
C4	5	31335.2	114448
C5	5	32205	105216
C6	5	28696.5	105919
C7	5	31955.7	116967
C8	5	34009.3	118336
C9	5	32383.2	101292
C10	5	34475.6	134092
C11	5	37522.4	153650
C12	5	42025	129699
D1	5	45681.3	141725
D2	5	33296.1	123265
D3	5	35731.9	127444
D4	5	31501.7	121678
D5	5	34340.8	112473
D6	5	39378.2	112097
D7	5	27799.9	113716
D8	5	28361.4	121567
D9	5	37809.2	105422
D10	5	43008.8	136297
D11	5	43057.5	153063
D12	5	147342	141840
E1	5	45802	137679
E2	5	42551.8	121377
E3	5	70443.6	129556
E4	5	32958.3	130893
E5	5	29079.8	112953
E6	5	29348.2	110296
E7	5	41838.6	120811
E8	5	35947.8	130702
E9	5	33689	109785
E10	5	36357.7	139169
E11	5	56947.2	145272
E12	5	56772.7	132301
F1	5	54102.4	158077
F2	5	44846.1	124808
F3	5	31864.5	133600
F4	5	33967.3	130327
F5	5	29231.5	118876
F6	5	57603.6	124745
F7	5	29157	124236
F8	5	31235	128902
F9	5	29142.9	108961
F10	5	34970.6	140785
F11	5	31449.2	140200
F12	5	53830.3	131280
G1	5	43636.2	153068
G2	5	47258.7	113022
G3	5	37940	143289
G4	5	31589.5	129144
G5	5	27586.4	118649
G6	5	28283.1	115385
G7	5	29478.6	117904
G8	5	36103.7	140637
G9	5	33586.6	117878
G10	5	38013	136224
G11	5	81435.9	150816
G12	5	41931.9	138677
H1	5	60780.4	154005
H2	5	41615.4	133627
H3	5	38384.7	147221
H4	5	35157.4	135437
H5	5	31952.5	135542
H6	5	38020.2	131716
H7	5	34227.4	136359
H8	5	38852.7	135991
H9	5	33178.8	118721
H10	5	50571.7	144579
H11	5	40618.8	140000
H12	5	51833.1	129118
A1	6	20446.6	103341
A2	6	32053.5	106998
A3	6	28249.9	107438
A4	6	35997	105059
A5	6	30958.6	108460
A6	6	46802.3	117339
A7	6	33293.2	105800
A8	6	175869	373583
A9	6	42844.5	114203
A10	6	33841.3	133610
A11	6	34686.5	141170
A12	6	34601.4	127146
B1	6	37343.4	134167
B2	6	39293.7	118495
B3	6	28083.6	113990
B4	6	31947.1	114368
B5	6	30147.8	123918
B6	6	26344.6	106293
B7	6	27907	110050
B8	6	108669	356339
B9	6	34350.5	108559
B10	6	42036.1	138166
B11	6	44358.5	150077
B12	6	42437.2	137849
C1	6	40813.1	135054
C2	6	40080.1	165162
C3	6	38979.4	118096
C4	6	31365.4	114157
C5	6	32008.4	104916
C6	6	28889.5	105555
C7	6	31369.8	116652
C8	6	33604.5	117774
C9	6	32457.4	101153
C10	6	34204.6	133655
C11	6	37095.4	153266
C12	6	41620	128703
D1	6	45822.7	140875
D2	6	32981.2	123046
D3	6	35603.8	126752
D4	6	31607.3	121173
D5	6	34133.8	111768
D6	6	39480.2	111860
D7	6	27874.6	113373
D8	6	28362.3	121580
D9	6	37352.9	105205
D10	6	42522.2	135999
D11	6	42919.4	152766
D12	6	145315	140704
E1	6	46009.6	136753
E2	6	42086.5	120817
E3	6	70011.2	129169
E4	6	33153.9	129657
E5	6	29115.2	112466
E6	6	29151.1	109957
E7	6	41777.3	120185
E8	6	36013.1	130279
E9	6	33659.9	109011
E10	6	36250.3	138871
E11	6	56469.4	144797
E12	6	56764	131521
F1	6	54558	157793
F2	6	44400.2	124353
F3	6	31804	133612
F4	6	33822.6	129753
F5	6	29197.3	118541
F6	6	57775.6	124398
F7	6	29243.9	123987
F8	6	31157.7	128812
F9	6	29393.7	108587
F10	6	35121.1	140538
F11	6	31425.2	139690
F12	6	53929.6	130593
G1	6	43830.4	152139
G2	6	46941	112606
G3	6	37897.2	142538
G4	6	31468.7	128861
G5	6	27634.4	117986
G6	6	28316	115081
G7	6	29423.4	117370
G8	6	36294.2	140066
G9	6	33590.1	117496
G10	6	38003.7	135768
G11	6	81066.5	150335
G12	6	41935.3	138128
H1	6	60903.9	153193
H2	6	41188.3	133558
H3	6	38239.9	147081
H4	6	35052.2	135083
H5	6	32158.3	134350
H6	6	37752.2	131092
H7	6	34139	135280
H8	6	38385.8	135273
H9	6	33125.8	117919
H10	6	50207.3	143954
H11	6	41132	140094
H12	6	52469.3	128481
A1	7	20226.5	102868
A2	7	31673.2	106621
A3	7	28409.3	106943
A4	7	35906.4	104913
A5	7	31024.7	107961
A6	7	46884.6	116664
A7	7	33003.2	104880
A8	7	173877	369787
A9	7	42443.5	113782
A10	7	34068.7	132683
A11	7	34133.4	140693
A12	7	33780.4	126608
B1	7	36581.5	134201
B2	7	39166.1	118045
B3	7	27987.9	114268
B4	7	31893.1	113808
B5	7	30108.9	123801
B6	7	26364.8	106169
B7	7	28392.4	109268
B8	7	108299	354788
B9	7	34419.5	108484
B10	7	41973.4	137499
B11	7	44305.2	149856
B12	7	42304.3	136863
C1	7	40664.3	134781
C2	7	40330.8	164406
C3	7	39016.8	117688
C4	7	31009.5	113943
C5	7	31872.9	104419
C6	7	28869.7	104827
C7	7	31125.6	116354
C8	7	33763.2	117360
C9	7	32286.1	100894
C10	7	34497	132721
C11	7	37054.8	152878
C12	7	41093.7	127820
D1	7	45381.8	140273
D2	7	32931	123243
D3	7	35189	126826
D4	7	31477.4	121238
D5	7	34020.2	111227
D6	7	39301.9	111621
D7	7	27694.6	113450
D8	7	28578.5	121088
D9	7	37258.3	104603
D10	7	42901.5	135529
D11	7	42928.9	152080
D12	7	144161	139984
E1	7	46004.6	136183
E2	7	42079.3	120479
E3	7	69900.3	128922
E4	7	32835.6	129749
E5	7	29243.8	111769
E6	7	28913.6	109966
E7	7	41625.2	120109
E8	7	35819.9	129951
E9	7	33565.8	108627
E10	7	36403.7	138460
E11	7	55781.2	144617
E12	7	56175	131083
F1	7	54112.2	157555
F2	7	44271.8	124016
F3	7	31558.2	133285
F4	7	33824.5	129643
F5	7	29099.5	118034
F6	7	57955.8	124108
F7	7	29137.8	123689
F8	7	31295.2	128555
F9	7	29225.4	108060
F10	7	34793.5	140044
F11	7	31301.6	139319
F12	7	53461.9	129427
G1	7	43246.7	151581
G2	7	46708.1	112590
G3	7	37741	142214
G4	7	31515.8	128568
G5	7	27783.3	117639
G6	7	28484.3	114497
G7	7	29588.2	116773
G8	7	35921.8	139602
G9	7	33592.7	117589
G10	7	38102.3	135366
G11	7	80672.7	150311
G12	7	42307.2	136942
H1	7	60702.5	152183
H2	7	40598.6	133166
H3	7	38235	146242
H4	7	35079.2	134150
H5	7	31793.8	133289
H6	7	37801.9	130045
H7	7	33942.8	134434
H8	7	38637.4	134358
H9	7	32900.1	117508
H10	7	50394	143230
H11	7	40929.1	139609
H12	7	52396.4	128167
A1	8	20166.7	102448
A2	8	31845.8	106063
A3	8	27760.3	106460
A4	8	36132.5	104183
A5	8	30652.2	107924
A6	8	46504.2	116194
A7	8	32924.6	104598
A8	8	171810	369082
A9	8	42271.6	113702
A10	8	34030.8	132621
A11	8	34070	140997
A12	8	34012.4	126210
B1	8	37179.9	133844
B2	8	39216.1	117694
B3	8	27617.6	114206
B4	8	31760.6	114024
B5	8	29754.4	123457
B6	8	26499.8	106032
B7	8	28174.8	109229
B8	8	107996	353407
B9	8	34251	108315
B10	8	41668.9	137294
B11	8	44651.4	149275
B12	8	42123.3	137263
C1	8	40400.2	134640
C2	8	40612.8	164526
C3	8	39069.1	117597
C4	8	31099.5	113771
C5	8	31857.8	104274
C6	8	28812.2	104748
C7	8	30798.3	116053
C8	8	34043.2	117044
C9	8	31920.1	100342
C10	8	34177.1	132360
C11	8	37152.7	152375
C12	8	41334.4	127545
D1	8	45690.7	140499
D2	8	32939.9	123171
D3	8	35464.4	126754
D4	8	31364.8	121062
D5	8	33963.7	111351
D6	8	39461	111233
D7	8	27842.4	113139
D8	8	28859.9	121025
D9	8	36749.6	104546
D10	8	42811.2	135573
D11	8	43064	151532
D12	8	142974	139695
E1	8	45860.2	136118
E2	8	42037.9	120589
E3	8	69700.6	128924
E4	8	32794.4	129703
E5	8	29361.4	111866
E6	8	28761.6	109857
E7	8	41547	119735
E8	8	35897.9	129678
E9	8	33347.5	108379
E10	8	36450.6	138283
E11	8	55766.9	143964
E12	8	56054.3	131079
F1	8	53583	157107
F2	8	44144.7	123948
F3	8	31523.4	132909
F4	8	33774.8	129142
F5	8	29158	117949
F6	8	58259.4	124071
F7	8	29136.3	123460
F8	8	31069.2	128352
F9	8	28836.3	107728
F10	8	35082.8	139788
F11	8	31518.5	139340
F12	8	53433.9	129355
G1	8	43092.9	151151
G2	8	46747.9	112095
G3	8	37768	141971
G4	8	31416.7	128372
G5	8	27826.4	117145
G6	8	28438.5	114558
G7	8	29448.5	116611
G8	8	36332.4	139407
G9	8	33511.8	116922
G10	8	37666.3	135338
G11	8	80095.1	149657
G12	8	42111.8	136838
H1	8	61268.1	151848
H2	8	41049	132717
H3	8	38395.7	145847
H4	8	34700.6	133701
H5	8	31857.6	132778
H6	8	37688	129676
H7	8	33894.2	133611
H8	8	38158.7	133777
H9	8	32826.6	117375
H10	8	50110.3	142250
H11	8	41511.2	139924
H12	8	52625.9	127498
A1	9	20098	101843
A2	9	32024	105456
A3	9	28310.4	106679
A4	9	36096.8	104391
A5	9	30730.9	106988
A6	9	46203.9	115592
A7	9	32880.9	103902
A8	9	171611	367508
A9	9	42150.2	112928
A10	9	33515.7	132162
A11	9	34199.5	140699
A12	9	34172.9	125680
B1	9	37006.5	133445
B2	9	38701.9	117418
B3	9	27186.2	113924
B4	9	32049.5	113907
B5	9	29485	122676
B6	9	26249.3	105399
B7	9	27965.8	109087
B8	9	107924	351631
B9	9	34043.1	107752
B10	9	41657.6	137076
B11	9	44237.9	148812
B12	9	42182.1	136447
C1	9	40719.8	134162
C2	9	40332.1	163815
C3	9	38824.8	117581
C4	9	31144.5	113837
C5	9	31966.8	103994
C6	9	28791.5	104267
C7	9	30918.4	115701
C8	9	33824.4	116335
C9	9	32086.1	100180
C10	9	34328.1	131800
C11	9	36778.2	151623
C12	9	41018.9	126654
D1	9	45694	139831
D2	9	32861.1	123028
D3	9	35618.5	126698
D4	9	31392.8	121003
D5	9	33898.8	110745
D6	9	39333.9	110774
D7	9	27558.8	112639
D8	9	28604.9	121010
D9	9	36687	103977
D10	9	42695.6	135297
D11	9	42722.1	151164
D12	9	141945	138637
E1	9	45675.5	135508
E2	9	41974.2	120409
E3	9	69237.5	128404
E4	9	32953.1	129557
E5	9	29246.7	111338
E6	9	28981.4	109430
E7	9	41513.1	119427
E8	9	35843.4	129681
E9	9	32995.7	107794
E10	9	36116.3	138052
E11	9	55192.6	143350
E12	9	55746.5	130265
F1	9	53606.9	156765
F2	9	44156.3	123737
F3	9	31524.9	132515
F4	9	34150.9	128869
F5	9	29214.8	117617
F6	9	57842.1	123797
F7	9	29179.8	123188
F8	9	31275.7	127996
F9	9	29124.7	107583
F10	9	34825.8	140017
F11	9	31276.7	138765
F12	9	53143.3	128862
G1	9	43061.1	151243
G2	9	46509.2	112113
G3	9	37634.7	141796
G4	9	31250	128010
G5	9	27427.3	117024
G6	9	28522.5	114147
G7	9	29487.7	116664
G8	9	36122.8	138890
G9	9	33299.8	116731
G10	9	37944.5	135054
G11	9	79205.3	149043
G12	9	42038	136018
H1	9	60857.9	151383
H2	9	40861.3	132490
H3	9	38327.1	145604
H4	9	34773.5	133278
H5	9	31930.9	132164
H6	9	37455.1	129549
H7	9	33858.5	133290
H8	9	38058	133461
H9	9	32897.6	116790
H10	9	49503.6	142067
H11	9	41439	139890
H12	9	52414.4	127772
A1	10	19856.3	101980
A2	10	31739.9	105318
A3	10	28229.8	106418
A4	10	35602.9	104031
A5	10	30887.4	106800
A6	10	45977.9	115412
A7	10	32610.9	103606
A8	10	171148	366800
A9	10	41988	113198
A10	10	33872.3	131682
A11	10	34400.2	140689
A12	10	34090.6	124645
B1	10	37067.3	133355
B2	10	39031.7	117147
B3	10	27617.7	113420
B4	10	31998.7	113589
B5	10	29746.5	122722
B6	10	26472.4	105434
B7	10	27885.1	108547
B8	10	107553	350827
B9	10	34283.3	107615
B10	10	41856.2	136344
B11	10	43896	148695
B12	10	42017.5	136168
C1	10	40765	134528
C2	10	40543.1	163875
C3	10	38974.3	117109
C4	10	31312.1	113702
C5	10	31687.1	103480
C6	10	28649.4	104210
C7	10	31004.5	115804
C8	10	33703.2	116153
C9	10	31921.7	100376
C10	10	34135.9	131560
C11	10	36963.9	151064
C12	10	41339	126389
D1	10	45612.3	139883
D2	10	32739.7	122915
D3	10	35163.7	126342
D4	10	31123.4	120696
D5	10	33816.2	110694
D6	10	39205.3	110532
D7	10	27428.8	112688
D8	10	28415.4	120546
D9	10	36900	103632
D10	10	42573.7	134924
D11	10	42826.9	151391
D12	10	140952	138111
E1	10	45439.3	135426
E2	10	41657	120208
E3	10	68939	128102
E4	10	33036.2	129580
E5	10	29145.4	110983
E6	10	28933.5	109638
E7	10	41259	119432
E8	10	35832.5	129627
E9	10	33292.8	107412
E10	10	36383.4	137962
E11	10	55332.5	143125
E12	10	55516.1	130206
F1	10	53513.7	156470
F2	10	43954.5	123843
F3	10	31913.7	132674
F4	10	33893	128561
F5	10	29299.9	117207
F6	10	57910.8	123335
F7	10	29009.4	122902
F8	10	31219.8	127688
F9	10	28983	107294
F10	10	34865.6	139466
F11	10	31411	138538
F12	10	53391.3	128238
G1	10	42921.5	151251
G2	10	46451.2	112314
G3	10	37270	141464
G4	10	31315.5	127992
G5	10	27472	116604
G6	10	28097.9	114427
G7	10	29467.9	116150
G8	10	36030.6	138737
G9	10	33235.6	116612
G10	10	37666.2	134451
G11	10	78915	148991
G12	10	41781.7	135406
H1	10	61353.3	150220
H2	10	40931.7	132022
H3	10	38266.2	145046
H4	10	34895.5	132594
H5	10	31569.8	131345
H6	10	37396	128659
H7	10	34091.8	132493
H8	10	37798.6	133004
H9	10	32880.2	116250
H10	10	49292.3	141597
H11	10	41100.4	139972
H12	10	51903.1	127402
A1	11	19881.3	101492
A2	11	31395.4	105169
A3	11	27781.1	106116
A4	11	35518.2	104013
A5	11	30320.7	106874
A6	11	45673.7	115421
A7	11	32915.1	103078
A8	11	169660	364630
A9	11	41682.6	112860
A10	11	33713.1	131491
A11	11	34430.5	140286
A12	11	33335.4	124676
B1	11	37104.4	132483
B2	11	38568.6	117483
B3	11	27570.6	112829
B4	11	32017.6	113283
B5	11	29858.2	121996
B6	11	26456.7	105074
B7	11	28302.3	108531
B8	11	107829	350841
B9	11	34245.9	107311
B10	11	41376	136027
B11	11	44208.1	147897
B12	11	42351.2	135221
C1	11	40721.1	133929
C2	11	40383.5	163803
C3	11	39281.8	116655
C4	11	31419.5	113254
C5	11	31752.1	103101
C6	11	28479.7	104103
C7	11	30770.5	115583
C8	11	33976.8	116159
C9	11	31881.4	100190
C10	11	34142.5	131172
C11	11	36672.3	150830
C12	11	40979.4	125664
D1	11	45840.4	139268
D2	11	32972.7	122726
D3	11	35312.7	126323
D4	11	31357.6	120481
D5	11	33954.3	110128
D6	11	39034	110408
D7	11	27560.5	112428
D8	11	28757.9	120427
D9	11	36565.3	103104
D10	11	42409.5	134632
D11	11	42544.8	150690
D12	11	139744	137819
E1	11	45450	135013
E2	11	41762.1	119810
E3	11	68710.2	128082
E4	11	32899.1	129473
E5	11	29141.5	110429
E6	11	28713	109113
E7	11	41277.7	118983
E8	11	35819.4	129239
E9	11	33143	107117
E10	11	36109.4	137813
E11	11	54835.8	142692
E12	11	55318.7	129693
F1	11	53498.5	155870
F2	11	43471.8	123713
F3	11	31614	132352
F4	11	33878.2	128308
F5	11	29339.3	117199
F6	11	57861.8	123220
F7	11	29101.4	122512
F8	11	30970.4	127644
F9	11	29004.7	106968
F10	11	34968.6	139347
F11	11	31495.8	138450
F12	11	53044.8	127910
G1	11	42469.6	150379
G2	11	46309.8	111862
G3	11	37177.5	140746
G4	11	31378.5	127587
G5	11	27654.1	116235
G6	11	28309.9	113921
G7	11	29644.8	115706
G8	11	36220.5	138377
G9	11	32926.2	116478
G10	11	37718.9	134442
G11	11	78446.6	148373
G12	11	41717	135431
H1	11	60799.7	149814
H2	11	41032.9	131960
H3	11	37941.6	144614
H4	11	34711.9	132230
H5	11	31606.2	130836
H6	11	37252.6	128672
H7	11	34069.5	132133
H8	11	37797.5	132442
H9	11	32866.6	116346
H10	11	48940	140990
H11	11	41279.1	140124
H12	11	52327.3	126501
A1	12	20025.7	101123
A2	12	31463.8	104877
A3	12	28138.2	105892
A4	12	35633.8	103723
A5	12	30421.9	106650
A6	12	45761.4	115241
A7	12	32747.5	103240
A8	12	168173	363672
A9	12	41795.7	112508
A10	12	33532.5	131180
A11	12	33961.4	140210
A12	12	33912.2	124276
B1	12	37050	132530
B2	12	38734.4	116329
B3	12	27688.6	113520
B4	12	31981.6	113665
B5	12	29757.4	121342
B6	12	26257.4	105174
B7	12	28191.1	108147
B8	12	107575	349904
B9	12	34030.8	107257
B10	12	41379.3	135847
B11	12	43823.7	147552
B12	12	41655.7	135109
C1	12	41139.8	133790
C2	12	40511.5	163449
C3	12	39046.1	117154
C4	12	31635.8	113730
C5	12	31813.6	102994
C6	12	28589.2	103785
C7	12	30968.9	115285
C8	12	33765.6	115615
C9	12	32014.1	99808.6
C10	12	33978.7	130941
C11	12	36807.8	150844
C12	12	40942.2	125805
D1	12	45279.5	138915
D2	12	32937.5	122815
D3	12	35149.3	126175
D4	12	31475.8	120795
D5	12	33625.2	109843
D6	12	38756.5	110305
D7	12	27104.4	112711
D8	12	28584.2	120367
D9	12	36532.7	103153
D10	12	42475.3	134434
D11	12	42926.1	150901
D12	12	138785	137100
E1	12	45588.2	134867
E2	12	41608.4	120062
E3	12	68499.8	127892
E4	12	32627.1	129256
E5	12	29287.5	110041
E6	12	28801.4	109484
E7	12	41017.5	118746
E8	12	35780.5	129255
E9	12	33013.2	107071
E10	12	36146	137650
E11	12	54592.1	142705
E12	12	54985.7	129452
F1	12	53361.1	155784
F2	12	43493.2	123091
F3	12	31662.7	132119
F4	12	33910.4	128550
F5	12	29076.4	117246
F6	12	57805.6	123024
F7	12	29067.8	122762
F8	12	31141	127297
F9	12	28932.4	106668
F10	12	34634.3	139204
F11	12	31284	137989
F12	12	52232.3	127996
G1	12	43061.7	150256
G2	12	46288.2	111744
G3	12	37643.2	140740
G4	12	31451.4	127306
G5	12	27644	116096
G6	12	28160.8	113727
G7	12	29595.6	115510
G8	12	36000.8	138278
G9	12	32960.7	116375
G10	12	37756.8	134390
G11	12	77841.5	148247
G12	12	41367.1	134865
H1	12	60939.5	149932
H2	12	40791.4	131830
H3	12	37860.8	144428
H4	12	34679.3	132084
H5	12	31600.8	130631
H6	12	37269.5	128119
H7	12	34035.9	131736
H8	12	37716.6	131946
H9	12	32914.9	116053
H10	12	48780.8	141131
H11	12	40884	140401
H12	12	52177.9	126414
A1	13	20110.2	101119
A2	13	31596	105021
A3	13	27969.4	105813
A4	13	35580.2	103371
A5	13	30808.8	106000
A6	13	45644.3	115028
A7	13	32670.4	102320
A8	13	167483	362926
A9	13	41659.6	112144
A10	13	33874.2	130812
A11	13	34352.5	140391
A12	13	33859.2	123801
B1	13	36996.1	131947
B2	13	38311.1	116570
B3	13	27736.6	113055
B4	13	31909.8	112995
B5	13	29606.7	121001
B6	13	26498.3	104458
B7	13	28083	107960
B8	13	106885	348383
B9	13	34113.7	107300
B10	13	41258.6	135296
B11	13	43894.7	147219
B12	13	41896.9	134768
C1	13	40822.7	133153
C2	13	40584.6	163049
C3	13	39274.9	116575
C4	13	31300.2	113289
C5	13	31758.6	102512
C6	13	28705.9	103660
C7	13	30986.7	115108
C8	13	33692.3	115390
C9	13	31718.7	99892
C10	13	34038.6	130261
C11	13	36745.1	150001
C12	13	40537.1	125598
D1	13	45487.3	138750
D2	13	33008.4	122417
D3	13	35311.4	126204
D4	13	31482.4	120380
D5	13	33884.3	109762
D6	13	38503.5	109917
D7	13	27169.6	112285
D8	13	28945.3	120219
D9	13	36331.5	102612
D10	13	42306.6	134111
D11	13	42475.7	149941
D12	13	138448	136574
E1	13	44903.6	133900
E2	13	41388.3	119324
E3	13	67915.3	127845
E4	13	32485.6	129044
E5	13	29184.4	109933
E6	13	28518.5	109225
E7	13	41321	118503
E8	13	35420	128873
E9	13	33216.4	106381
E10	13	35940.6	137512
E11	13	54163.5	142036
E12	13	54737.1	128869
F1	13	53014.5	155178
F2	13	43295.2	122654
F3	13	31719.6	131716
F4	13	33907.8	128016
F5	13	29167.6	116548
F6	13	57912.9	122612
F7	13	29089.4	122413
F8	13	31045.6	126770
F9	13	29006.4	105838
F10	13	34297.3	138748
F11	13	31310.9	137613
F12	13	52422.4	127201
G1	13	42593.3	149724
G2	13	46442.8	111099
G3	13	37302.1	140090
G4	13	31512.1	127028
G5	13	27579.9	115532
G6	13	28187	113538
G7	13	29549.7	115323
G8	13	36055.5	137704
G9	13	32738.9	115780
G10	13	37543.8	134002
G11	13	77486.7	147644
G12	13	41493.3	134367
H1	13	60581.5	148767
H2	13	40505.2	131158
H3	13	37803.7	143892
H4	13	34468.2	131700
H5	13	31495.7	129979
H6	13	36951.9	127457
H7	13	33706	131257
H8	13	37575.6	131322
H9	13	32827.2	116019
H10	13	48538.6	140563
H11	13	41015	140210
H12	13	52633.5	126356
A1	14	19564.1	100918
A2	14	31027.4	104730
A3	14	28321.9	105585
A4	14	35522.6	103656
A5	14	30276.4	105745
A6	14	45449.8	114488
A7	14	32433.8	102716
A8	14	167496	362522
A9	14	41444.4	111978
A10	14	33664.1	130654
A11	14	34032.8	139807
A12	14	33639.4	123180
B1	14	37431.3	132093
B2	14	38099.9	116336
B3	14	27747.4	112874
B4	14	32008.9	113111
B5	14	29517.1	120866
B6	14	26503.5	104906
B7	14	28304.9	107871
B8	14	106825	347508
B9	14	33895.8	107240
B10	14	41007.5	135136
B11	14	43423.2	146585
B12	14	41712.2	134130
C1	14	40506.1	133432
C2	14	40307.1	163374
C3	14	39188.8	116782
C4	14	31220.1	113399
C5	14	31725.6	102300
C6	14	28437	103358
C7	14	30695	114853
C8	14	33687.3	114828
C9	14	31642.5	99733.5
C10	14	33861.4	129777
C11	14	36646.3	149566
C12	14	40944.8	125007
D1	14	45343.1	138518
D2	14	33040.5	122733
D3	14	35304.1	126103
D4	14	31272.9	120408
D5	14	33912.2	109132
D6	14	38476.4	109945
D7	14	27403.2	112283
D8	14	28834.9	120389
D9	14	36102.6	102396
D10	14	42502.7	133892
D11	14	42548.6	149952
D12	14	137415	136884
E1	14	45483	134212
E2	14	41754.9	119505
E3	14	67954.4	127773
E4	14	32715.7	128637
E5	14	29247.6	109659
E6	14	28774.3	109295
E7	14	41584.7	118749
E8	14	35575.9	129154
E9	14	33041.3	106643
E10	14	35994	137410
E11	14	53991.3	141971
E12	14	54501.2	129079
F1	14	53154.1	155043
F2	14	42968.7	122886
F3	14	31555.8	131634
F4	14	34011	127700
F5	14	29147	116725
F6	14	57595.1	122499
F7	14	29019.1	122147
F8	14	31117.7	126902
F9	14	28958.4	105704
F10	14	34580	138503
F11	14	31523.4	137213
F12	14	52622.3	127190
G1	14	42369.8	149530
G2	14	46150.6	111139
G3	14	37273.6	140324
G4	14	31460.4	127190
G5	14	27439.7	115227
G6	14	28110.2	113380
G7	14	29555.9	114878
G8	14	35934	137639
G9	14	33063.1	116093
G10	14	37594.9	134112
G11	14	77210.2	147247
G12	14	41206.9	134400
H1	14	60162.5	148480
H2	14	40656.7	130810
H3	14	38049.8	143749
H4	14	34376.5	131456
H5	14	31564.7	129651
H6	14	37141.2	127223
H7	14	33535.8	130771
H8	14	37275.6	130950
H9	14	32825.1	115928
H10	14	48028.5	140657
H11	14	41053.4	140085
H12	14	53207.7	125905
A1	15	19985.3	100841
A2	15	31165.4	104518
A3	15	28134.9	105413
A4	15	35482.4	103632
A5	15	30694.4	105781
A6	15	45194.9	114366
A7	15	32747.8	102052
A8	15	166990	361533
A9	15	41336.8	111944
A10	15	33362.8	130189
A11	15	33828.4	140219
A12	15	33145.4	122619
B1	15	36577.4	132074
B2	15	38004.8	116178
B3	15	27491.2	112630
B4	15	31945.2	113074
B5	15	29432.3	120756
B6	15	26308.2	104590
B7	15	28004	107600
B8	15	107565	346699
B9	15	33810.4	106993
B10	15	40936.2	135195
B11	15	43686.6	146991
B12	15	41644.6	134375
C1	15	40492	133020
C2	15	40196.3	163556
C3	15	39202.4	116424
C4	15	31197.9	112787
C5	15	31688.2	101899
C6	15	28738.5	103516
C7	15	30873.3	115157
C8	15	33627.1	114615
C9	15	31877.9	99588.5
C10	15	33832.5	129317
C11	15	37201.6	149412
C12	15	39962.4	124711
D1	15	45017.5	138211
D2	15	32943.8	122586
D3	15	34961.1	126042
D4	15	31017.3	120103
D5	15	33549.9	109381
D6	15	37918.7	109983
D7	15	27344	112388
D8	15	28973.6	120134
D9	15	35865.5	102442
D10	15	42361	134097
D11	15	42570.1	150009
D12	15	136658	136333
E1	15	44990.2	134316
E2	15	41368.4	119444
E3	15	67488.1	127473
E4	15	32760	128921
E5	15	29071.2	109548
E6	15	28567.7	109262
E7	15	41104.1	118441
E8	15	35699.7	128951
E9	15	33078.4	106376
E10	15	36001.4	137649
E11	15	53982.2	141620
E12	15	54168.5	128722
F1	15	52736.9	154940
F2	15	43221.7	122874
F3	15	31754.4	131283
F4	15	34010.6	127485
F5	15	29261.1	116474
F6	15	57375.4	122580
F7	15	29261.4	122061
F8	15	31033.2	126911
F9	15	29020.2	105585
F10	15	34291.7	138428
F11	15	31719.1	137271
F12	15	52244.5	126832
G1	15	42294.8	149114
G2	15	46022	111598
G3	15	37159.4	139942
G4	15	31424.1	126861
G5	15	27370.7	115125
G6	15	28442.2	112696
G7	15	29601.3	114779
G8	15	36048.4	137468
G9	15	33048.8	116041
G10	15	37552.4	133342
G11	15	76971.8	146584
G12	15	41637.2	133859
H1	15	60196.9	147889
H2	15	40313.1	130625
H3	15	37688	143651
H4	15	34314	130983
H5	15	31525	129246
H6	15	37045.8	126643
H7	15	33846.2	130546
H8	15	37561.9	130851
H9	15	32493.5	115983
H10	15	48233	140654
H11	15	41247.5	140286
H12	15	52725.3	125815
A1	16	19938.1	101156
A2	16	30810.8	104344
A3	16	27989.7	105046
A4	16	35511.2	103337
A5	16	30190.1	105197
A6	16	45044.7	114093
A7	16	32225	101650
A8	16	166752	360600
A9	16	40932.9	111310
A10	16	33925.9	129876
A11	16	34196.1	139307
A12	16	34235.8	122813
B1	16	36557.8	131624
B2	16	38318.9	116038
B3	16	27698.2	112677
B4	16	31856.4	112749
B5	16	29645.2	120349
B6	16	26539.2	104432
B7	16	27863.4	107324
B8	16	107027	346479
B9	16	33900.2	106666
B10	16	41041.5	134494
B11	16	43252.9	146292
B12	16	41777	133876
C1	16	40344.9	133390
C2	16	40244	163178
C3	16	39451.6	116393
C4	16	30942.9	113086
C5	16	31385.2	101809
C6	16	28484.4	103282
C7	16	30998.6	114910
C8	16	33440.3	114168
C9	16	31707.5	99649.1
C10	16	33896	129133
C11	16	37178.7	149032
C12	16	40292.5	124669
D1	16	45185.8	138343
D2	16	33172.3	122983
D3	16	34786.3	125999
D4	16	31367	119989
D5	16	33289.3	108662
D6	16	37754.3	109816
D7	16	27187	112167
D8	16	29109.5	119926
D9	16	36037.5	102184
D10	16	41870.6	133560
D11	16	42257	149575
D12	16	135718	136075
E1	16	44980.9	133370
E2	16	41293.5	118881
E3	16	67304.4	127252
E4	16	32574.7	129065
E5	16	29001.3	109383
E6	16	28782.9	109396
E7	16	41198.9	118619
E8	16	35608.9	129045
E9	16	33032.1	106071
E10	16	36087.1	137411
E11	16	53369.8	141292
E12	16	53822.5	128231
F1	16	52393.5	154785
F2	16	42951.6	122364
F3	16	31797.1	131272
F4	16	33985.4	127570
F5	16	29033.2	116110
F6	16	57424.9	122417
F7	16	29019	121946
F8	16	31191.4	126223
F9	16	29046.8	105365
F10	16	34414.8	138415
F11	16	31561.1	137032
F12	16	52135.6	126647
G1	16	42321.6	149245
G2	16	45694.6	111084
G3	16	37212.9	139242
G4	16	31047	126613
G5	16	27531.7	114904
G6	16	28249.1	112653
G7	16	29642.1	114454
G8	16	36034.9	137311
G9	16	33038.6	115677
G10	16	37266.3	133567
G11	16	76392.2	146586
G12	16	41459.8	133807
H1	16	60192.9	148101
H2	16	40704.8	130307
H3	16	37790.5	143610
H4	16	34464	130781
H5	16	31328.1	129049
H6	16	36696.2	126355
H7	16	33648.5	130330
H8	16	37193.8	130389
H9	16	32513.5	115659
H10	16	47731.1	140481
H11	16	41153.6	140303
H12	16	52030.3	125331
A1	17	19805.3	100643
A2	17	31306.8	104245
A3	17	28078.8	104905
A4	17	35628.6	103399
A5	17	30154.6	104936
A6	17	45007.4	114032
A7	17	32312.4	101421
A8	17	165082	360076
A9	17	40982.4	111387
A10	17	33766.8	129959
A11	17	33605.3	139100
A12	17	33713.6	122007
B1	17	36959.7	131759
B2	17	38051.5	115948
B3	17	27421.9	112492
B4	17	32287.8	112933
B5	17	29122.1	119858
B6	17	26747.2	104446
B7	17	28180.7	107499
B8	17	106918	344867
B9	17	33748.8	106694
B10	17	40920	134333
B11	17	43238	145869
B12	17	41536.6	133534
C1	17	40341.6	133078
C2	17	40486.5	163085
C3	17	39226.7	115976
C4	17	31036.1	112655
C5	17	31298	101450
C6	17	28584.5	103260
C7	17	30908.2	114373
C8	17	33553.8	114218
C9	17	31857.2	99266
C10	17	33995.5	128610
C11	17	37004.6	149107
C12	17	40563.1	124482
D1	17	45203	137783
D2	17	33078	122374
D3	17	34739.5	125737
D4	17	31356.5	119598
D5	17	33771.4	108814
D6	17	37889.9	109540
D7	17	27376.8	112232
D8	17	28868	119890
D9	17	35753.2	101817
D10	17	42141.4	133365
D11	17	42491.5	149191
D12	17	135573	135598
E1	17	45034.6	133746
E2	17	41547	119027
E3	17	67397.9	127331
E4	17	32378.7	129014
E5	17	29009.1	108806
E6	17	28608.7	109001
E7	17	41096.5	118394
E8	17	35789.4	129114
E9	17	33232.3	105750
E10	17	35954.7	137153
E11	17	53591.6	141226
E12	17	53671.1	128198
F1	17	52578.2	154301
F2	17	42432.8	121893
F3	17	31641.1	131167
F4	17	33705.4	127054
F5	17	29313.1	116157
F6	17	57101.9	122088
F7	17	29286.6	121732
F8	17	30960	126328
F9	17	29032.5	105004
F10	17	34287.2	138051
F11	17	31434.6	136799
F12	17	52127.9	126754
G1	17	42320.8	149106
G2	17	45951	110810
G3	17	37320.4	139402
G4	17	31385.9	126376
G5	17	27261.3	114667
G6	17	28125.6	112517
G7	17	29551.8	114180
G8	17	36109.8	136836
G9	17	33107.6	115638
G10	17	37416.2	133342
G11	17	76305.2	146361
G12	17	41541.7	133429
H1	17	59972.9	147468
H2	17	41054.6	130411
H3	17	37658.5	143019
H4	17	34304.2	130606
H5	17	31005.8	128616
H6	17	36698.1	126144
H7	17	33734.1	129998
H8	17	37073	129958
H9	17	32505.8	115851
H10	17	47923.1	140174
H11	17	40750.1	139964
H12	17	52689.6	124832
A1	18	20127	100495
A2	18	31252.1	103793
A3	18	28125.6	104815
A4	18	35505.2	103327
A5	18	30166.6	104951
A6	18	44935.2	113988
A7	18	32221.1	101238
A8	18	164772	359250
A9	18	41313.2	111006
A10	18	33479.9	129975
A11	18	34214.3	138609
A12	18	33294.5	121956
B1	18	37018.1	131134
B2	18	38043.5	115828
B3	18	27606.2	112118
B4	18	32057.7	112633
B5	18	29571.2	119739
B6	18	26700.4	103947
B7	18	28009.2	107603
B8	18	106148	343491
B9	18	33738	106704
B10	18	40792.4	133890
B11	18	43049.6	145985
B12	18	41631.8	133196
C1	18	40386.4	132652
C2	18	40298.3	162503
C3	18	39494.1	115650
C4	18	31452.4	112860
C5	18	31110.8	101534
C6	18	28769.2	102716
C7	18	30758.1	114681
C8	18	33390.4	113947
C9	18	31603.2	99392.9
C10	18	34022.2	128583
C11	18	36795.9	148796
C12	18	39971.3	124053
D1	18	45202.4	137666
D2	18	32945.4	122789
D3	18	34853.3	125564
D4	18	31148.9	119626
D5	18	33730.8	108608
D6	18	37965.8	109369
D7	18	27495.4	112332
D8	18	29253.5	119979
D9	18	35920.5	101921
D10	18	41785.8	133476
D11	18	42584.5	149309
D12	18	134846	135764
E1	18	44860.8	133124
E2	18	41285.9	118811
E3	18	67131.6	126999
E4	18	32370.1	129084
E5	18	29069.7	108841
E6	18	28386	109172
E7	18	41072.8	118272
E8	18	35507.6	128951
E9	18	33177.4	105738
E10	18	36050.7	137233
E11	18	53476.6	141200
E12	18	53496.8	128146
F1	18	52686.3	154347
F2	18	42801.5	121933
F3	18	31546.6	131104
F4	18	33989.6	127010
F5	18	29063.6	115801
F6	18	57042.3	121965
F7	18	29294	121659
F8	18	31416.7	126297
F9	18	29175.8	104919
F10	18	34359.1	138153
F11	18	31277.7	136145
F12	18	51887.4	126132
G1	18	42671.5	148520
G2	18	45982	110673
G3	18	37334.6	139243
G4	18	31194.1	126305
G5	18	27462.1	114429
G6	18	28433.4	112677
G7	18	29773.2	113843
G8	18	36243.9	136793
G9	18	32984.2	115590
G10	18	37483.1	133175
G11	18	75813.4	146016
G12	18	41096.5	133373
H1	18	59594.6	146925
H2	18	40483.2	130311
H3	18	37415	142892
H4	18	34137.9	130389
H5	18	30976.6	128360
H6	18	36591.6	126120
H7	18	33725.3	129680
H8	18	36996.2	129814
H9	18	32349.2	115910
H10	18	47543.3	139948
H11	18	40955.4	140252
H12	18	52525.8	124651
A1	19	20345.7	100017
A2	19	31490.5	104129
A3	19	28797.7	104729
A4	19	34931.7	103093
A5	19	30412.3	104941
A6	19	44941.8	113522
A7	19	32168.6	101143
A8	19	165183	358381
A9	19	41272.5	111219
A10	19	33677.9	129699
A11	19	34149	138686
A12	19	33310.8	121873
B1	19	36802.5	131313
B2	19	37891.5	115956
B3	19	27416.9	112199
B4	19	31928.1	112700
B5	19	29573.4	119345
B6	19	26679.5	104110
B7	19	28060	107351
B8	19	107478	343977
B9	19	33912.3	106855
B10	19	40873.7	133513
B11	19	43251.4	145100
B12	19	41124.9	132938
C1	19	40893	132850
C2	19	39850.6	163062
C3	19	39487.5	115878
C4	19	31316	113060
C5	19	31495.2	101144
C6	19	28885	102948
C7	19	32571.4	114440
C8	19	33633.3	113599
C9	19	31885.6	99343.4
C10	19	33866.6	128014
C11	19	36616.6	148238
C12	19	39981.4	124142
D1	19	45586.6	137752
D2	19	32867.3	122611
D3	19	34825.8	125530
D4	19	31333.8	120008
D5	19	33402.7	108601
D6	19	37814.7	109424
D7	19	27190.1	112456
D8	19	29408.9	119975
D9	19	35559.7	101356
D10	19	42170.2	133501
D11	19	42474	149368
D12	19	133809	134917
E1	19	44930.6	133448
E2	19	41212.8	118880
E3	19	67204	127477
E4	19	32481.3	129123
E5	19	28990.6	108497
E6	19	28566.3	109462
E7	19	41258.5	118086
E8	19	35711.2	128785
E9	19	33035.4	105665
E10	19	36300.2	137274
E11	19	53456.4	140920
E12	19	53700.4	128040
F1	19	52764.8	153849
F2	19	42936.2	122083
F3	19	31544.9	130849
F4	19	33849.7	127053
F5	19	29110.1	116225
F6	19	56783.2	121681
F7	19	29419.2	121558
F8	19	31390.2	126047
F9	19	29115.4	104521
F10	19	34526.4	137903
F11	19	31343.5	136320
F12	19	52140.9	125944
G1	19	42573.8	148484
G2	19	45784.6	110621
G3	19	37564	138791
G4	19	31705.5	126569
G5	19	27506.2	114434
G6	19	28325.7	112426
G7	19	30085.2	113970
G8	19	36653.1	136547
G9	19	33526.3	115411
G10	19	37539.2	133206
G11	19	75528.4	145494
G12	19	41422.4	133714
H1	19	59718.6	146805
H2	19	40602.5	129726
H3	19	37477.9	142841
H4	19	34163.2	130566
H5	19	31093.2	128134
H6	19	36501.3	125548
H7	19	33552.5	129502
H8	19	36979.3	129738
H9	19	32451.5	115947
H10	19	47023.9	140108
H11	19	40594.1	140402
H12	19	52679	124496
A1	20	20353.9	100034
A2	20	31733.6	103795
A3	20	29054.8	104184
A4	20	35341.7	103086
A5	20	30313.8	104627
A6	20	44651.8	113419
A7	20	32815.2	100606
A8	20	165398	358920
A9	20	41188.1	110973
A10	20	34067.5	129918
A11	20	34049.9	138349
A12	20	33731.2	121605
B1	20	37159.4	130874
B2	20	38071.2	115647
B3	20	27442.7	112058
B4	20	32396.6	112916
B5	20	29137.3	119448
B6	20	26524.5	103695
B7	20	28053.1	107050
B8	20	108226	343471
B9	20	33842.5	106811
B10	20	40322.7	133588
B11	20	42982.8	144509
B12	20	41553	132934
C1	20	40779.2	132254
C2	20	40891.8	163068
C3	20	39745.5	115679
C4	20	31536.6	112404
C5	20	31202.7	101319
C6	20	28858.1	102638
C7	20	31942.8	114496
C8	20	33500.2	113590
C9	20	32017.3	99438.5
C10	20	34012.4	127567
C11	20	36993.2	147860
C12	20	40381.3	123451
D1	20	45811.5	137237
D2	20	32843.6	122622
D3	20	35002.8	125670
D4	20	31487.3	119383
D5	20	33052.8	108133
D6	20	37644.3	109245
D7	20	27426	112378
D8	20	29593.3	119614
D9	20	36223.7	101170
D10	20	42219.9	133266
D11	20	42790.5	148408
D12	20	133556	134574
E1	20	45136.5	132817
E2	20	41081.1	118671
E3	20	67236.4	127272
E4	20	32076.9	129029
E5	20	28860.6	108049
E6	20	28324.5	109269
E7	20	41454.8	118223
E8	20	35889.3	128838
E9	20	33672.5	105619
E10	20	36458.6	137292
E11	20	53471	140618
E12	20	53955.3	127625
F1	20	52403.4	153723
F2	20	42775.5	122085
F3	20	31585.7	130359
F4	20	33684.8	126851
F5	20	29102.8	115590
F6	20	56629.5	121402
F7	20	29819.9	121474
F8	20	31907.5	126071
F9	20	29458.8	104457
F10	20	34741.1	137626
F11	20	31624.5	136031
F12	20	51862.6	125859
G1	20	42626.2	148150
G2	20	45988.4	110568
G3	20	37646.7	138587
G4	20	31387.4	126278
G5	20	27197.2	113592
G6	20	28233	112105
G7	20	30755.6	113763
G8	20	37730.1	136345
G9	20	34258.3	115453
G10	20	37891.8	133167
G11	20	75240.7	145191
G12	20	41970.8	132896
H1	20	59324.6	145909
H2	20	40314.8	129892
H3	20	37608.2	142562
H4	20	34212.6	130173
H5	20	31041	127635
H6	20	36360.9	125490
H7	20	33583.2	128858
H8	20	36959.8	129193
H9	20	32320.3	115791
H10	20	46884.4	139927
H11	20	41096.8	140243
H12	20	52592.1	124488
A1	21	21123.3	99950.1
A2	21	32404.5	103919
A3	21	29762.4	104575
A4	21	35401.7	103107
A5	21	30151.6	104468
A6	21	44213.1	113300
A7	21	32783.6	100560
A8	21	166239	357621
A9	21	41366.4	110690
A10	21	33953.1	129468
A11	21	34506.3	137925
A12	21	34010.3	121227
B1	21	37545	130876
B2	21	38374.9	115350
B3	21	27596.4	111562
B4	21	32400	112414
B5	21	29312.5	119255
B6	21	26510.4	103733
B7	21	28415.3	106696
B8	21	108194	342764
B9	21	34392.5	106445
B10	21	40680.1	133442
B11	21	43142.5	144586
B12	21	41637.4	132484
C1	21	40876	132505
C2	21	40921	163013
C3	21	40121.2	116073
C4	21	31108.9	112671
C5	21	31297.8	100981
C6	21	29131.5	102215
C7	21	32337.5	114131
C8	21	34119.2	113212
C9	21	32457.3	99082.4
C10	21	34426	127669
C11	21	36974.1	147200
C12	21	40231.2	123058
D1	21	45621.8	137436
D2	21	33494.1	122730
D3	21	35060.9	125970
D4	21	31196	119595
D5	21	33494.3	107988
D6	21	37567.7	109233
D7	21	28135.3	112415
D8	21	30100.3	119500
D9	21	36124.5	101129
D10	21	42519.2	132883
D11	21	43060.8	148516
D12	21	133632	134504
E1	21	45061.4	132626
E2	21	41494.6	118649
E3	21	67405.4	126827
E4	21	32170.6	129223
E5	21	29178.1	108314
E6	21	28393.1	109160
E7	21	41758.3	118442
E8	21	36578.6	129085
E9	21	33684.4	105317
E10	21	36508.6	137341
E11	21	53387.2	140433
E12	21	53839.9	127347
F1	21	52683.1	153356
F2	21	42717.9	121415
F3	21	31967.1	130663
F4	21	33781.6	126650
F5	21	29351.9	115591
F6	21	56263.7	121284
F7	21	30370.6	121385
F8	21	32411.3	125733
F9	21	30289.5	104095
F10	21	34620.3	137391
F11	21	32110.7	135941
F12	21	52522.2	125597
G1	21	43052.5	148027
[truncated: 10,295 more rows]

## Sheet: Amplification Data
Block Type	96alum
Chemistry	SYBR_GREEN
Experiment File Name	D:\ShuJu\LZM\13-16 spx iaa +lp.eds
Experiment Run End Time	2023-08-17 08:06:49 AM CST
Instrument Type	sds7500
Passive Reference	ROX
Well	Cycle	Target Name	Rn	ΔRn
A1	1	SPX13	0.189712	-0.00138171
A1	2	SPX13	0.190989	-0.000645972
A1	3	SPX13	0.191006	-0.0011702
A1	4	SPX13	0.18952	-0.00319841
A1	5	SPX13	0.192198	-0.00106161
A1	6	SPX13	0.197857	0.00405612
A1	7	SPX13	0.196626	0.00228397
A1	8	SPX13	0.196847	0.00196381
A1	9	SPX13	0.197343	0.00191824
A1	10	SPX13	0.194707	-0.00125916
A1	11	SPX13	0.19589	-0.000618004
A1	12	SPX13	0.198033	0.000983922
A1	13	SPX13	0.198876	0.00128557
A1	14	SPX13	0.193861	-0.00427051
A1	15	SPX13	0.198186	-0.000487146
A1	16	SPX13	0.197102	-0.00211259
A1	17	SPX13	0.196787	-0.00296912
A1	18	SPX13	0.20028	-1.78593e-05
A1	19	SPX13	0.203423	0.00258402
A1	20	SPX13	0.203469	0.00208895
A1	21	SPX13	0.211338	0.00941655
A1	22	SPX13	0.223616	0.0211533
A1	23	SPX13	0.245095	0.0420902
A1	24	SPX13	0.291	0.0874546
A1	25	SPX13	0.360684	0.156597
A1	26	SPX13	0.480131	0.275502
A1	27	SPX13	0.670034	0.464864
A1	28	SPX13	0.900424	0.694713
A1	29	SPX13	1.136	0.929744
A1	30	SPX13	1.32185	1.11506
A1	31	SPX13	1.44315	1.23581
A1	32	SPX13	1.55296	1.34508
A1	33	SPX13	1.61993	1.41151
A1	34	SPX13	1.66586	1.4569
A1	35	SPX13	1.71959	1.51009
A1	36	SPX13	1.73857	1.52853
A1	37	SPX13	1.75907	1.54848
A1	38	SPX13	1.77226	1.56114
A1	39	SPX13	1.78672	1.57505
A1	40	SPX13	1.79028	1.57807
A2	1	SPX13	0.292571	-0.0076645
A2	2	SPX13	0.298894	-0.00135343
A2	3	SPX13	0.299434	-0.000825494
A2	4	SPX13	0.300644	0.000371828
A2	5	SPX13	0.30589	0.00560507
A2	6	SPX13	0.29957	-0.000727582
A2	7	SPX13	0.297063	-0.00324688
A2	8	SPX13	0.300253	-6.92508e-05
A2	9	SPX13	0.303671	0.00333693
A2	10	SPX13	0.301371	0.00102393
A2	11	SPX13	0.298524	-0.00183491
A2	12	SPX13	0.300007	-0.000364328
A2	13	SPX13	0.300854	0.000470061
A2	14	SPX13	0.296262	-0.00413423
A2	15	SPX13	0.298182	-0.00222726
A2	16	SPX13	0.295283	-0.00513858
A2	17	SPX13	0.300319	-0.000114874
A2	18	SPX13	0.3011	0.000654129
A2	19	SPX13	0.302418	0.0019599
A2	20	SPX13	0.305732	0.00526154
A2	21	SPX13	0.311824	0.0113405
A2	22	SPX13	0.327024	0.0265278
A2	23	SPX13	0.361741	0.0612333
A2	24	SPX13	0.417105	0.116585
A2	25	SPX13	0.521864	0.221331
A2	26	SPX13	0.695923	0.395378
A2	27	SPX13	0.948907	0.648349
A2	28	SPX13	1.23697	0.936397
A2	29	SPX13	1.52146	1.22088
A2	30	SPX13	1.71141	1.41081
A2	31	SPX13	1.86071	1.5601
A2	32	SPX13	1.98332	1.6827
A2	33	SPX13	2.07331	1.77268
A2	34	SPX13	2.13893	1.83829
A2	35	SPX13	2.18156	1.8809
A2	36	SPX13	2.22159	1.92092
A2	37	SPX13	2.24709	1.94641
A2	38	SPX13	2.26149	1.96079
A2	39	SPX13	2.26861	1.9679
A2	40	SPX13	2.27593	1.97521
A3	1	SPX13	0.254286	-0.00449097
A3	2	SPX13	0.257994	-0.00148255
A3	3	SPX13	0.259832	-0.000344159
A3	4	SPX13	0.262284	0.00140881
A3	5	SPX13	0.264785	0.00321018
A3	6	SPX13	0.262941	0.000666735
A3	7	SPX13	0.265649	0.00267544
A3	8	SPX13	0.260757	-0.00291616
A3	9	SPX13	0.265379	0.00100627
A3	10	SPX13	0.265272	0.000199135
A3	11	SPX13	0.261798	-0.0039737
A3	12	SPX13	0.265725	-0.000746077
A3	13	SPX13	0.264328	-0.00284285
A3	14	SPX13	0.268239	0.000368559
A3	15	SPX13	0.266901	-0.00166915
A3	16	SPX13	0.266452	-0.00281752
A3	17	SPX13	0.26766	-0.00230912
A3	18	SPX13	0.268336	-0.00233287
A3	19	SPX13	0.274973	0.00360488
A3	20	SPX13	0.278879	0.00681158
A3	21	SPX13	0.284604	0.011837
A3	22	SPX13	0.299916	0.0264493
A3	23	SPX13	0.328532	0.0543656
A3	24	SPX13	0.384896	0.110031
A3	25	SPX13	0.479513	0.203948
A3	26	SPX13	0.640277	0.364012
A3	27	SPX13	0.890119	0.613154
A3	28	SPX13	1.18595	0.908285
A3	29	SPX13	1.49647	1.21811
A3	30	SPX13	1.7191	1.44004
A3	31	SPX13	1.88384	1.60407
A3	32	SPX13	2.00712	1.72666
A3	33	SPX13	2.09877	1.81761
A3	34	SPX13	2.15181	1.86994
A3	35	SPX13	2.19826	1.9157
A3	36	SPX13	2.24207	1.95881
A3	37	SPX13	2.2624	1.97844
A3	38	SPX13	2.28477	2.00011
A3	39	SPX13	2.29365	2.00829
A3	40	SPX13	2.30191	2.01585
A4	1	SPX14	0.337015	-0.00471019
A4	2	SPX14	0.339746	-0.0020775
A4	3	SPX14	0.341032	-0.000890876
A4	4	SPX14	0.341827	-0.000195246
A4	5	SPX14	0.34342	0.00129927
A4	6	SPX14	0.342637	0.000416833
A4	7	SPX14	0.342248	-7.0987e-05
A4	8	SPX14	0.346818	0.00439952
A4	9	SPX14	0.345784	0.00326604
A4	10	SPX14	0.342234	-0.000382289
A4	11	SPX14	0.34148	-0.00123593
A4	12	SPX14	0.343547	0.000732138
A4	13	SPX14	0.344199	0.00128516
A4	14	SPX14	0.342697	-0.000315803
A4	15	SPX14	0.342387	-0.000724796
A4	16	SPX14	0.343646	0.000434499
A4	17	SPX14	0.344575	0.00126504
A4	18	SPX14	0.343619	0.000209609
A4	19	SPX14	0.338835	-0.00467319
A4	20	SPX14	0.342836	-0.000771306
A4	21	SPX14	0.343349	-0.000357903
A4	22	SPX14	0.339624	-0.00418117
A4	23	SPX14	0.342763	-0.00114206
A4	24	SPX14	0.338388	-0.0056158
A4	25	SPX14	0.34233	-0.0017728
A4	26	SPX14	0.342316	-0.00188618
A4	27	SPX14	0.34529	0.000988681
A4	28	SPX14	0.342765	-0.00163457
A4	29	SPX14	0.342897	-0.00160192
A4	30	SPX14	0.342354	-0.00224417
A4	31	SPX14	0.348912	0.00421502
A4	32	SPX14	0.348242	0.0034461
A4	33	SPX14	0.352634	0.00773908
A4	34	SPX14	0.36236	0.0173659
A4	35	SPX14	0.3785	0.0334068
A4	36	SPX14	0.412974	0.0677812
A4	37	SPX14	0.472412	0.12712
A4	38	SPX14	0.57864	0.23325
A4	39	SPX14	0.74515	0.39966
A4	40	SPX14	0.965444	0.619855
A5	1	SPX14	0.279289	-0.00628792
A5	2	SPX14	0.282588	-0.0031222
A5	3	SPX14	0.28514	-0.000704016
A5	4	SPX14	0.286629	0.000652552
A5	5	SPX14	0.285739	-0.000371072
A5	6	SPX14	0.285437	-0.000805803
A5	7	SPX14	0.287371	0.000994462
A5	8	SPX14	0.284015	-0.00249411
A5	9	SPX14	0.287236	0.00059391
A5	10	SPX14	0.289207	0.00243137
A5	11	SPX14	0.283707	-0.0032022
A5	12	SPX14	0.285251	-0.00179115
A5	13	SPX14	0.290648	0.00347235
A5	14	SPX14	0.286315	-0.000993025
A5	15	SPX14	0.29017	0.00272833
A5	16	SPX14	0.286987	-0.000587632
A5	17	SPX14	0.287362	-0.000346148
A5	18	SPX14	0.287435	-0.000405727
A5	19	SPX14	0.289803	0.0018284
A5	20	SPX14	0.289732	0.00162497
A5	21	SPX14	0.288621	0.000381012
A5	22	SPX14	0.285675	-0.00269859
A5	23	SPX14	0.288523	1.64619e-05
A5	24	SPX14	0.291694	0.00305409
A5	25	SPX14	0.289374	0.000600758
A5	26	SPX14	0.288259	-0.000647487
A5	27	SPX14	0.288741	-0.000298565
A5	28	SPX14	0.287104	-0.00206904
A5	29	SPX14	0.290613	0.00130771
A5	30	SPX14	0.285094	-0.00434487
A5	31	SPX14	0.2898	0.000228353
A5	32	SPX14	0.290959	0.00125331
A5	33	SPX14	0.291204	0.00136542
A5	34	SPX14	0.288829	-0.00114236
A5	35	SPX14	0.288725	-0.00137962
A5	36	SPX14	0.291382	0.00114457
A5	37	SPX14	0.291907	0.00153617
A5	38	SPX14	0.289931	-0.000572792
A5	39	SPX14	0.290277	-0.000360008
A5	40	SPX14	0.290853	8.2493e-05
A6	1	SPX14	0.381425	-0.0189384
A6	2	SPX14	0.394298	-0.00572823
A6	3	SPX14	0.396803	-0.0028856
A6	4	SPX14	0.39735	-0.0020013
A6	5	SPX14	0.399159	0.000145388
A6	6	SPX14	0.398863	0.00018729
A6	7	SPX14	0.401876	0.00353749
A6	8	SPX14	0.400228	0.00222729
A6	9	SPX14	0.399714	0.00205029
A6	10	SPX14	0.39838	0.00105424
A6	11	SPX14	0.395712	-0.00127669
A6	12	SPX14	0.397094	0.000442549
A6	13	SPX14	0.396811	0.000497684
A6	14	SPX14	0.396984	0.00100745
A6	15	SPX14	0.395179	-0.000460073
A6	16	SPX14	0.394808	-0.000493689
A6	17	SPX14	0.394693	-0.000271036
A6	18	SPX14	0.39421	-0.000415994
A6	19	SPX14	0.395886	0.0015968
A6	20	SPX14	0.393688	-0.000263107
A6	21	SPX14	0.39023	-0.00338392
A6	22	SPX14	0.389586	-0.00369061
A6	23	SPX14	0.393542	0.000602741
A6	24	SPX14	0.392307	-0.000294309
A6	25	SPX14	0.391281	-0.000983189
A6	26	SPX14	0.392855	0.00092869
A6	27	SPX14	0.390487	-0.00110198
A6	28	SPX14	0.388336	-0.00291539
A6	29	SPX14	0.389699	-0.00121514
A6	30	SPX14	0.393448	0.00287153
A6	31	SPX14	0.394742	0.00450259
A6	32	SPX14	0.403413	0.0135111
A6	33	SPX14	0.413558	0.0239941
A6	34	SPX14	0.435362	0.0461353
A6	35	SPX14	0.481643	0.0927535
A6	36	SPX14	0.557055	0.168503
A6	37	SPX14	0.68607	0.297856
A6	38	SPX14	0.877882	0.490006
A6	39	SPX14	1.07158	0.68404
A6	40	SPX14	1.24326	0.856055
A7	1	SPX15	0.30744	-0.00340873
A7	2	SPX15	0.305329	-0.00614786
A7	3	SPX15	0.312813	0.000707425
A7	4	SPX15	0.311791	-0.00094249
A7	5	SPX15	0.316253	0.00289119
A7	6	SPX15	0.31468	0.000690592
A7	7	SPX15	0.314676	5.78013e-05
A7	8	SPX15	0.314774	-0.000472529
A7	9	SPX15	0.316461	0.000586826
A7	10	SPX15	0.314758	-0.00174428
A7	11	SPX15	0.319321	0.00219052
A7	12	SPX15	0.317197	-0.000562018
A7	13	SPX15	0.319296	0.000908491
A7	14	SPX15	0.315763	-0.00325278
A7	15	SPX15	0.320893	0.00124913
A7	16	SPX15	0.317019	-0.00325283
A7	17	SPX15	0.318597	-0.00230327
A7	18	SPX15	0.318272	-0.00325658
A7	19	SPX15	0.31805	-0.0041063
A7	20	SPX15	0.326175	0.00339095
A7	21	SPX15	0.326011	0.00259794
A7	22	SPX15	0.328663	0.00462221
A7	23	SPX15	0.334417	0.00974785
A7	24	SPX15	0.353729	0.0284318
A7	25	SPX15	0.38219	0.0562642
A7	26	SPX15	0.432268	0.105714
A7	27	SPX15	0.510508	0.183326
A7	28	SPX15	0.623946	0.296136
A7	29	SPX15	0.775512	0.447074
A7	30	SPX15	0.922005	0.592938
A7	31	SPX15	1.07795	0.748251
A7	32	SPX15	1.23424	0.903919
A7	33	SPX15	1.36482	1.03387
A7	34	SPX15	1.47741	1.14584
A7	35	SPX15	1.58497	1.25276
A7	36	SPX15	1.67058	1.33775
A7	37	SPX15	1.75078	1.41732
A7	38	SPX15	1.81114	1.47705
A7	39	SPX15	1.8585	1.52378
A7	40	SPX15	1.90325	1.5679
A8	1	SPX15	0.458862	-0.0107671
A8	2	SPX15	0.46273	-0.00647465
A8	3	SPX15	0.46829	-0.000490248
A8	4	SPX15	0.467839	-0.0005162
A8	5	SPX15	0.470452	0.00252072
A8	6	SPX15	0.470764	0.00325685
A8	7	SPX15	0.470208	0.00312522
A8	8	SPX15	0.465506	-0.00115248
A8	9	SPX15	0.466959	0.000724979
A8	10	SPX15	0.466598	0.000788375
A8	11	SPX15	0.465294	-9.12939e-05
A8	12	SPX15	0.462431	-0.00253055
A8	13	SPX15	0.461481	-0.0030562
A8	14	SPX15	0.46203	-0.00208243
A8	15	SPX15	0.461893	-0.00179495
A8	16	SPX15	0.462429	-0.000834771
A8	17	SPX15	0.458465	-0.00437501
A8	18	SPX15	0.458655	-0.00375995
A8	19	SPX15	0.460914	-0.0010774
A8	20	SPX15	0.460821	-0.000746173
A8	21	SPX15	0.464846	0.00370335
A8	22	SPX15	0.469106	0.00838816
A8	23	SPX15	0.478667	0.0183731
A8	24	SPX15	0.500894	0.0410242
A8	25	SPX15	0.53683	0.0773851
A8	26	SPX15	0.600333	0.141312
A8	27	SPX15	0.694916	0.236319
A8	28	SPX15	0.817947	0.359775
A8	29	SPX15	0.967879	0.510131
A8	30	SPX15	1.10488	0.647561
A8	31	SPX15	1.24229	0.785389
A8	32	SPX15	1.38601	0.929532
A8	33	SPX15	1.50645	1.0504
A8	34	SPX15	1.62298	1.16736
A8	35	SPX15	1.72087	1.26567
A8	36	SPX15	1.79437	1.33959
A8	37	SPX15	1.86167	1.40732
A8	38	SPX15	1.91359	1.45966
A8	39	SPX15	1.96445	1.51095
A8	40	SPX15	2.01024	1.55716
A9	1	SPX15	0.360596	-0.010246
A9	2	SPX15	0.364183	-0.00674482
A9	3	SPX15	0.369063	-0.001952
A9	4	SPX15	0.371635	0.000534212
A9	5	SPX15	0.373689	0.00250225
A9	6	SPX15	0.375162	0.00388837
A9	7	SPX15	0.373025	0.00166546
A9	8	SPX15	0.371775	0.000328686
A9	9	SPX15	0.373247	0.00171436
A9	10	SPX15	0.370927	-0.000691989
A9	11	SPX15	0.369329	-0.00237622
A9	12	SPX15	0.371491	-0.000299944
A9	13	SPX15	0.371482	-0.000395061
A9	14	SPX15	0.370114	-0.00184988
A9	15	SPX15	0.369263	-0.00278664
A9	16	SPX15	0.367736	-0.00440019
A9	17	SPX15	0.367927	-0.00429545
A9	18	SPX15	0.372171	-0.000137715
A9	19	SPX15	0.371093	-0.00130208
A9	20	SPX15	0.371153	-0.00132823
A9	21	SPX15	0.373713	0.00114469
A9	22	SPX15	0.382692	0.0100374
A9	23	SPX15	0.387964	0.0152232
A9	24	SPX15	0.411926	0.0390991
A9	25	SPX15	0.442536	0.0696228
A9	26	SPX15	0.499014	0.126014
A9	27	SPX15	0.589233	0.216147
A9	28	SPX15	0.707709	0.334537
A9	29	SPX15	0.860976	0.487717
A9	30	SPX15	0.998318	0.624973
A9	31	SPX15	1.13996	0.766528
A9	32	SPX15	1.28721	0.913692
A9	33	SPX15	1.40106	1.02745
A9	34	SPX15	1.51824	1.14455
A9	35	SPX15	1.62409	1.25031
A9	36	SPX15	1.69773	1.32387
A9	37	SPX15	1.77134	1.39739
A9	38	SPX15	1.83348	1.45944
A9	39	SPX15	1.87992	1.5058
A9	40	SPX15	1.93476	1.56055
A10	1	SPX16	0.247015	-0.00395328
A10	2	SPX16	0.250139	-0.00136538
A10	3	SPX16	0.250183	-0.00185777
A10	4	SPX16	0.254055	0.00147882
A10	5	SPX16	0.251027	-0.00208497
A10	6	SPX16	0.253284	-0.000363882
A10	7	SPX16	0.256767	0.00258298
A10	8	SPX16	0.256601	0.00188194
A10	9	SPX16	0.253595	-0.00166078
A10	10	SPX16	0.257227	0.00143611
A10	11	SPX16	0.25639	6.33866e-05
A10	12	SPX16	0.255622	-0.00124052
A10	13	SPX16	0.258953	0.00155452
A10	14	SPX16	0.257657	-0.000277211
A10	15	SPX16	0.256264	-0.00220601
A10	16	SPX16	0.261218	0.00221201
A10	17	SPX16	0.259827	0.000284785
A10	18	SPX16	0.257586	-0.00249168
A10	19	SPX16	0.259662	-0.000951883
A10	20	SPX16	0.262223	0.00107373
A10	21	SPX16	0.262252	0.000566435
A10	22	SPX16	0.264403	0.00218193
A10	23	SPX16	0.275035	0.0122783
A10	24	SPX16	0.288574	0.025281
A10	25	SPX16	0.313483	0.0496543
A10	26	SPX16	0.359624	0.0952596
A10	27	SPX16	0.441511	0.17661
A10	28	SPX16	0.578912	0.313475
A10	29	SPX16	0.797672	0.5317
A10	30	SPX16	1.07095	0.804445
A10	31	SPX16	1.34963	1.08258
A10	32	SPX16	1.59416	1.32658
A10	33	SPX16	1.7658	1.49768
A10	34	SPX16	1.90395	1.6353
A10	35	SPX16	2.02324	1.75405
A10	36	SPX16	2.10968	1.83996
A10	37	SPX16	2.18335	1.91309
A10	38	SPX16	2.2352	1.96441
A10	39	SPX16	2.28132	2.00999
A10	40	SPX16	2.32726	2.0554
A11	1	SPX16	0.238615	-0.00105202
A11	2	SPX16	0.239616	-0.000465547
A11	3	SPX16	0.238682	-0.00181268
A11	4	SPX16	0.243122	0.00221346
A11	5	SPX16	0.241033	-0.000289361
A11	6	SPX16	0.245707	0.00397118
A11	7	SPX16	0.242608	0.000458371
A11	8	SPX16	0.241636	-0.000927926
A11	9	SPX16	0.243069	9.18083e-05
A11	10	SPX16	0.244512	0.00112109
A11	11	SPX16	0.245431	0.00162552
A11	12	SPX16	0.242219	-0.00200007
A11	13	SPX16	0.244691	5.82934e-05
A11	14	SPX16	0.243427	-0.00161919
A11	15	SPX16	0.241253	-0.00420673
A11	16	SPX16	0.245473	-0.000400593
A11	17	SPX16	0.241592	-0.00469567
A11	18	SPX16	0.246841	0.000139714
A11	19	SPX16	0.246233	-0.000882323
A11	20	SPX16	0.246117	-0.00141212
A11	21	SPX16	0.250181	0.00223779
A11	22	SPX16	0.254686	0.00632942
A11	23	SPX16	0.263617	0.0148471
A11	24	SPX16	0.274402	0.0252177
A11	25	SPX16	0.304391	0.0547933
A11	26	SPX16	0.353724	0.103712
A11	27	SPX16	0.440467	0.190042
A11	28	SPX16	0.587852	0.337012
A11	29	SPX16	0.81132	0.560067
A11	30	SPX16	1.07975	0.828079
A11	31	SPX16	1.34097	1.08889
A11	32	SPX16	1.57592	1.32343
A11	33	SPX16	1.74177	1.48886
A11	34	SPX16	1.87794	1.62462
A11	35	SPX16	2.00228	1.74855
A11	36	SPX16	2.08974	1.83559
A11	37	SPX16	2.15301	1.89845
A11	38	SPX16	2.22124	1.96627
A11	39	SPX16	2.26495	2.00956
A11	40	SPX16	2.29384	2.03803
A12	1	SPX16	0.26466	-0.000152045
A12	2	SPX16	0.261147	-0.0043559
A12	3	SPX16	0.264009	-0.00218426
A12	4	SPX16	0.268461	0.00157615
A12	5	SPX16	0.268242	0.000666109
A12	6	SPX16	0.272139	0.00387228
A12	7	SPX16	0.266811	-0.00214636
A12	8	SPX16	0.269489	-0.000158595
A12	9	SPX16	0.271904	0.00156518
A12	10	SPX16	0.273502	0.00247242
A12	11	SPX16	0.267375	-0.00434539
A12	12	SPX16	0.272878	0.000466054
A12	13	SPX16	0.273497	0.000394176
A12	14	SPX16	0.273092	-0.000701054
A12	15	SPX16	0.270312	-0.00417221
A12	16	SPX16	0.278762	0.00358748
A12	17	SPX16	0.276325	0.000459345
A12	18	SPX16	0.273005	-0.00355139
A12	19	SPX16	0.273323	-0.00392445
A12	20	SPX16	0.277384	-0.000554991
A12	21	SPX16	0.280551	0.0019215
A12	22	SPX16	0.284078	0.004758
A12	23	SPX16	0.292325	0.0123141
A12	24	SPX16	0.30707	0.0263678
A12	25	SPX16	0.336318	0.0549253
A12	26	SPX16	0.390269	0.108185
A12	27	SPX16	0.476128	0.193353
A12	28	SPX16	0.628139	0.344674
A12	29	SPX16	0.863194	0.579037
A12	30	SPX16	1.13625	0.851401
A12	31	SPX16	1.40346	1.11792
A12	32	SPX16	1.64013	1.35391
A12	33	SPX16	1.81155	1.52463
A12	34	SPX16	1.95877	1.67116
A12	35	SPX16	2.0811	1.7928
A12	36	SPX16	2.18361	1.89462
A12	37	SPX16	2.2538	1.96411
A12	38	SPX16	2.32127	2.03089
A12	39	SPX16	2.36569	2.07463
A12	40	SPX16	2.40283	2.11107
B1	1	SPX13	0.268228	-0.00460779
B1	2	SPX13	0.273607	0.000186197
B1	3	SPX13	0.271615	-0.00239041
B1	4	SPX13	0.278552	0.0039612
B1	5	SPX13	0.27542	0.000245019
B1	6	SPX13	0.278336	0.00257552
B1	7	SPX13	0.272588	-0.00375644
B1	8	SPX13	0.277785	0.00085572
B1	9	SPX13	0.277318	-0.000196732
B1	10	SPX13	0.277959	-0.000140418
B1	11	SPX13	0.280069	0.0013847
B1	12	SPX13	0.279559	0.00029026
B1	13	SPX13	0.280387	0.000533405
B1	14	SPX13	0.283371	0.00293319
B1	15	SPX13	0.276945	-0.00407746
B1	16	SPX13	0.277744	-0.003864
B1	17	SPX13	0.28051	-0.00168194
B1	18	SPX13	0.282292	-0.000484706
B1	19	SPX13	0.280265	-0.00309644
B1	20	SPX13	0.283933	-1.4033e-05
B1	21	SPX13	0.286875	0.00234314
B1	22	SPX13	0.289697	0.00458042
B1	23	SPX13	0.294661	0.00896033
B1	24	SPX13	0.307502	0.0212167
B1	25	SPX13	0.332937	0.0460661
B1	26	SPX13	0.372923	0.0854674
B1	27	SPX13	0.452232	0.164192
B1	28	SPX13	0.58732	0.298695
B1	29	SPX13	0.80539	0.516181
B1	30	SPX13	1.09075	0.800954
B1	31	SPX13	1.39352	1.10315
B1	32	SPX13	1.64953	1.35857
B1	33	SPX13	1.81606	1.52451
B1	34	SPX13	1.9338	1.64167
B1	35	SPX13	2.03314	1.74042
B1	36	SPX13	2.09683	1.80353
B1	37	SPX13	2.14571	1.85182
B1	38	SPX13	2.19219	1.89772
B1	39	SPX13	2.20952	1.91446
B1	40	SPX13	2.23316	1.93752
B2	1	SPX13	0.328031	-0.00207896
B2	2	SPX13	0.329347	-0.000831741
B2	3	SPX13	0.333765	0.0035171
B2	4	SPX13	0.331219	0.000902059
B2	5	SPX13	0.328621	-0.00176519
B2	6	SPX13	0.331607	0.0011517
B2	7	SPX13	0.331789	0.00126501
B2	8	SPX13	0.333203	0.00260989
B2	9	SPX13	0.329607	-0.00105523
B2	10	SPX13	0.333186	0.00245467
B2	11	SPX13	0.32829	-0.00250986
B2	12	SPX13	0.332972	0.00210311
B2	13	SPX13	0.328654	-0.00228409
B2	14	SPX13	0.3275	-0.00350745
B2	15	SPX13	0.327124	-0.00395187
B2	16	SPX13	0.330227	-0.000918504
B2	17	SPX13	0.328178	-0.00303668
B2	18	SPX13	0.328449	-0.00283447
B2	19	SPX13	0.326776	-0.00457651
B2	20	SPX13	0.329203	-0.00221844
B2	21	SPX13	0.332683	0.00119258
B2	22	SPX13	0.334152	0.00259275
B2	23	SPX13	0.342498	0.0108694
B2	24	SPX13	0.350901	0.0192037
B2	25	SPX13	0.369894	0.0381273
B2	26	SPX13	0.415395	0.0835599
B2	27	SPX13	0.490039	0.158134
B2	28	SPX13	0.619872	0.287899
B2	29	SPX13	0.828378	0.496335
B2	30	SPX13	1.11848	0.786369
B2	31	SPX13	1.43818	1.106
B2	32	SPX13	1.71868	1.38643
B2	33	SPX13	1.89935	1.56703
B2	34	SPX13	2.03167	1.69928
B2	35	SPX13	2.1453	1.81285
B2	36	SPX13	2.21847	1.88594
B2	37	SPX13	2.26826	1.93566
B2	38	SPX13	2.31868	1.98601
B2	39	SPX13	2.34173	2.00899
B2	40	SPX13	2.35625	2.02345
B3	1	SPX13	0.236253	-0.0039114
B3	2	SPX13	0.242763	0.00217774
B3	3	SPX13	0.241603	0.000596904
B3	4	SPX13	0.24207	0.000643146
B3	5	SPX13	0.243985	0.00213745
B3	6	SPX13	0.246369	0.00410054
B3	7	SPX13	0.244932	0.00224326
B3	8	SPX13	0.241823	-0.00128685
B3	9	SPX13	0.238635	-0.00489585
B3	10	SPX13	0.2435	-0.000451025
B3	11	SPX13	0.244358	-1.34492e-05
B3	12	SPX13	0.243909	-0.000883346
B3	13	SPX13	0.245337	0.000123619
B3	14	SPX13	0.245827	0.000192957
B3	15	SPX13	0.244085	-0.00196966
B3	16	SPX13	0.24582	-0.000655344
B3	17	SPX13	0.243769	-0.00312759
B3	18	SPX13	0.246225	-0.00109191
B3	19	SPX13	0.244359	-0.00337888
B3	20	SPX13	0.244897	-0.00326199
B3	21	SPX13	0.247363	-0.00121622
B3	22	SPX13	0.251684	0.00268392
B3	23	SPX13	0.258931	0.00951033
B3	24	SPX13	0.266858	0.0170164
B3	25	SPX13	0.286256	0.0359941
B3	26	SPX13	0.321104	0.0704206
B3	27	SPX13	0.385071	0.133967
B3	28	SPX13	0.496716	0.245192
B3	29	SPX13	0.685133	0.433188
B3	30	SPX13	0.964133	0.711767
B3	31	SPX13	1.28066	1.02787
B3	32	SPX13	1.58831	1.3351
B3	33	SPX13	1.80201	1.54838
B3	34	SPX13	1.94665	1.6926
B3	35	SPX13	2.07628	1.82181
B3	36	SPX13	2.16054	1.90565
B3	37	SPX13	2.21859	1.96328
B3	38	SPX13	2.26534	2.00961
B3	39	SPX13	2.30337	2.04722
B3	40	SPX13	2.32379	2.06722
B4	1	SPX14	0.270299	-0.00588167
B4	2	SPX14	0.274643	-0.0020474
B4	3	SPX14	0.276965	-0.000234253
B4	4	SPX14	0.279817	0.00210761
B4	5	SPX14	0.27471	-0.00350902
B4	6	SPX14	0.279335	0.000606886
B4	7	SPX14	0.280235	0.000997206
B4	8	SPX14	0.278542	-0.00120468
B4	9	SPX14	0.281365	0.0011087
B4	10	SPX14	0.281706	0.000939538
B4	11	SPX14	0.282633	0.00135775
B4	12	SPX14	0.281367	-0.000418257
B4	13	SPX14	0.282401	0.000106233
B4	14	SPX14	0.282986	0.000181782
B4	15	SPX14	0.282515	-0.000798417
B4	16	SPX14	0.282542	-0.00128124
B4	17	SPX14	0.285902	0.00156973
B4	18	SPX14	0.284622	-0.000220134
B4	19	SPX14	0.283301	-0.00205012
B4	20	SPX14	0.28691	0.00104912
B4	21	SPX14	0.288222	0.00185107
B4	22	SPX14	0.286977	9.64839e-05
B4	23	SPX14	0.286159	-0.00123106
B4	24	SPX14	0.287013	-0.000886189
B4	25	SPX14	0.289408	0.000998927
B4	26	SPX14	0.287769	-0.00114931
B4	27	SPX14	0.289646	0.00021882
B4	28	SPX14	0.28614	-0.00379737
B4	29	SPX14	0.290182	-0.000264276
B4	30	SPX14	0.289306	-0.00165038
B4	31	SPX14	0.29319	0.00172476
B4	32	SPX14	0.295755	0.00378011
B4	33	SPX14	0.303628	0.0111434
B4	34	SPX14	0.316277	0.0232833
B4	35	SPX14	0.343134	0.04963
B4	36	SPX14	0.394419	0.100406
B4	37	SPX14	0.482842	0.188319
B4	38	SPX14	0.628512	0.33348
B4	39	SPX14	0.826086	0.530544
B4	40	SPX14	1.05602	0.75997
B5	1	SPX14	0.234566	-0.00594296
B5	2	SPX14	0.236229	-0.00457417
B5	3	SPX14	0.240865	-0.000232819
B5	4	SPX14	0.242402	0.00100994
B5	5	SPX14	0.237905	-0.00378222
B5	6	SPX14	0.243289	0.00130732
B5	7	SPX14	0.243205	0.000928602
B5	8	SPX14	0.24101	-0.00156088
B5	9	SPX14	0.240349	-0.00251601
B5	10	SPX14	0.24239	-0.000769612
B5	11	SPX14	0.244747	0.00129223
B5	12	SPX14	0.245237	0.00148803
B5	13	SPX14	0.244681	0.000637456
B5	14	SPX14	0.244214	-0.000124338
B5	15	SPX14	0.243733	-0.000900212
B5	16	SPX14	0.246326	0.00139892
B5	17	SPX14	0.242972	-0.0022494
B5	18	SPX14	0.246964	0.00144792
B5	19	SPX14	0.247798	0.00198691
B5	20	SPX14	0.243932	-0.00217339
B5	21	SPX14	0.245797	-0.000603642
B5	22	SPX14	0.246684	-1.03982e-05
B5	23	SPX14	0.247461	0.000471445
B5	24	SPX14	0.24839	0.00110638
B5	25	SPX14	0.247167	-0.000411273
B5	26	SPX14	0.249573	0.00170044
B5	27	SPX14	0.25226	0.00409232
B5	28	SPX14	0.250577	0.00211499
B5	29	SPX14	0.24963	0.000873336
B5	30	SPX14	0.247814	-0.0012375
B5	31	SPX14	0.252596	0.00324995
B5	32	SPX14	0.249169	-0.00047108
B5	33	SPX14	0.248027	-0.00190772
B5	34	SPX14	0.249218	-0.00101128
B5	35	SPX14	0.250005	-0.000518827
B5	36	SPX14	0.248062	-0.00275692
B5	37	SPX14	0.251269	0.000155925
B5	38	SPX14	0.25103	-0.000377538
B5	39	SPX14	0.250055	-0.00164706
B5	40	SPX14	0.25026	-0.00173715
B6	1	SPX14	0.237246	-0.00719179
B6	2	SPX14	0.239995	-0.00500208
B6	3	SPX14	0.240278	-0.00527784
B6	4	SPX14	0.241906	-0.0042082
B6	5	SPX14	0.248222	0.0015492
B6	6	SPX14	0.247849	0.000617249
B6	7	SPX14	0.248328	0.000537709
B6	8	SPX14	0.249922	0.00157285
B6	9	SPX14	0.249046	0.000137842
B6	10	SPX14	0.25108	0.00161263
B6	11	SPX14	0.25179	0.00176411
B6	12	SPX14	0.249656	-0.00092888
B6	13	SPX14	0.253673	0.0025301
B6	14	SPX14	0.25264	0.000938032
B6	15	SPX14	0.251535	-0.000725531
B6	16	SPX14	0.254129	0.00130931
B6	17	SPX14	0.256086	0.00270752
B6	18	SPX14	0.256865	0.00292791
B6	19	SPX14	0.256263	0.00176735
B6	20	SPX14	0.255792	0.00073709
B6	21	SPX14	0.255563	-5.05829e-05
B6	22	SPX14	0.25421	-0.00196252
B6	23	SPX14	0.256486	-0.000245366
B6	24	SPX14	0.254207	-0.00308305
B6	25	SPX14	0.255826	-0.00202301
B6	26	SPX14	0.258495	8.72059e-05
B6	27	SPX14	0.257451	-0.00151538
B6	28	SPX14	0.255529	-0.00399595
B6	29	SPX14	0.258717	-0.0013669
B6	30	SPX14	0.262116	0.00147267
B6	31	SPX14	0.264316	0.00311442
B6	32	SPX14	0.273475	0.011715
B6	33	SPX14	0.289717	0.027398
B6	34	SPX14	0.316141	0.053263
B6	35	SPX14	0.364233	0.100796
B6	36	SPX14	0.45404	0.190044
B6	37	SPX14	0.605665	0.341111
B6	38	SPX14	0.824541	0.559427
B6	39	SPX14	1.06905	0.803378
B6	40	SPX14	1.28723	1.021
B7	1	SPX15	0.24696	-0.00582302
B7	2	SPX15	0.250056	-0.0033375
B7	3	SPX15	0.255816	0.00181237
B7	4	SPX15	0.254746	0.000133146
B7	5	SPX15	0.253348	-0.00187521
B7	6	SPX15	0.253584	-0.00224971
B7	7	SPX15	0.259842	0.00339868
B7	8	SPX15	0.257942	0.000888308
B7	9	SPX15	0.256362	-0.00130107
B7	10	SPX15	0.256894	-0.00137907
B7	11	SPX15	0.260776	0.00189221
B7	12	SPX15	0.260673	0.00117975
B7	13	SPX15	0.260124	2.01905e-05
B7	14	SPX15	0.262396	0.00168262
B7	15	SPX15	0.260259	-0.00106424
B7	16	SPX15	0.259619	-0.00231466
B7	17	SPX15	0.262147	-0.000396296
B7	18	SPX15	0.260301	-0.00285327
B7	19	SPX15	0.261386	-0.00237745
B7	20	SPX15	0.262055	-0.00231884
B7	21	SPX15	0.26632	0.00133632
B7	22	SPX15	0.27138	0.00578622
B7	23	SPX15	0.277488	0.0112836
B7	24	SPX15	0.292252	0.0254382
B7	25	SPX15	0.312372	0.0449476
B7	26	SPX15	0.358563	0.0905286
B7	27	SPX15	0.431473	0.162829
B7	28	SPX15	0.532022	0.262767
B7	29	SPX15	0.677134	0.40727
B7	30	SPX15	0.844205	0.57373
B7	31	SPX15	1.0131	0.742018
B7	32	SPX15	1.186	0.914303
B7	33	SPX15	1.32039	1.04809
B7	34	SPX15	1.45542	1.18251
B7	35	SPX15	1.58232	1.3088
B7	36	SPX15	1.67945	1.40532
B7	37	SPX15	1.76522	1.49047
B7	38	SPX15	1.8376	1.56225
B7	39	SPX15	1.89763	1.62166
B7	40	SPX15	1.95009	1.67351
B8	1	SPX15	0.299492	-0.001606
B8	2	SPX15	0.303008	0.00125828
B8	3	SPX15	0.305625	0.00322329
B8	4	SPX15	0.302468	-0.000585373
B8	5	SPX15	0.304281	0.000575534
B8	6	SPX15	0.304959	0.000602015
B8	7	SPX15	0.305249	0.000239964
B8	8	SPX15	0.305584	-7.70262e-05
B8	9	SPX15	0.306925	0.000611961
B8	10	SPX15	0.306569	-0.000396264
B8	11	SPX15	0.307345	-0.000271614
B8	12	SPX15	0.307442	-0.000826546
B8	13	SPX15	0.306803	-0.00211822
B8	14	SPX15	0.307402	-0.00217036
B8	15	SPX15	0.310253	2.85634e-05
B8	16	SPX15	0.3089	-0.00197709
B8	17	SPX15	0.310028	-0.00150053
B8	18	SPX15	0.309027	-0.0031532
B8	19	SPX15	0.312458	-0.000374683
B8	20	SPX15	0.315096	0.00161151
B8	21	SPX15	0.315652	0.00151565
B8	22	SPX15	0.319831	0.00504242
B8	23	SPX15	0.326605	0.0111644
B8	24	SPX15	0.346558	0.030466
B8	25	SPX15	0.370537	0.0537934
B8	26	SPX15	0.416671	0.0992755
B8	27	SPX15	0.495036	0.176988
B8	28	SPX15	0.607828	0.289128
B8	29	SPX15	0.766858	0.447507
B8	30	SPX15	0.936291	0.616287
B8	31	SPX15	1.09882	0.778164
B8	32	SPX15	1.2625	0.941188
B8	33	SPX15	1.40504	1.08308
B8	34	SPX15	1.53963	1.21702
B8	35	SPX15	1.65901	1.33574
B8	36	SPX15	1.75142	1.4275
B8	37	SPX15	1.83452	1.50995
B8	38	SPX15	1.89901	1.5738
B8	39	SPX15	1.95991	1.63404
B8	40	SPX15	2.00482	1.6783
B9	1	SPX15	0.307645	-0.0078615
B9	2	SPX15	0.312902	-0.00275143
B9	3	SPX15	0.316842	0.00104226
B9	4	SPX15	0.314208	-0.00173802
B9	5	SPX15	0.315682	-0.000410048
B9	6	SPX15	0.316421	0.000182997
B9	7	SPX15	0.317277	0.000892091
B9	8	SPX15	0.316216	-0.000314418
B9	9	SPX15	0.315939	-0.000737811
B9	10	SPX15	0.318573	0.00175007
B9	11	SPX15	0.319128	0.00215807
B9	12	SPX15	0.317284	0.000167996
B9	13	SPX15	0.317927	0.000664719
B9	14	SPX15	0.316075	-0.00133361
B9	15	SPX15	0.316005	-0.00155011
B9	16	SPX15	0.317817	0.000115666
B9	17	SPX15	0.316314	-0.00153338
B9	18	SPX15	0.316184	-0.00180952
B9	19	SPX15	0.317367	-0.000773074
B9	20	SPX15	0.316844	-0.00144201
B9	21	SPX15	0.3231	0.00466813
B9	22	SPX15	0.327183	0.00860425
B9	23	SPX15	0.339904	0.021179
B9	24	SPX15	0.361114	0.0422432
B9	25	SPX15	0.393519	0.0745016
B9	26	SPX15	0.458587	0.139424
B9	27	SPX15	0.562582	0.243272
B9	28	SPX15	0.69307	0.373614
B9	29	SPX15	0.8491	0.529497
B9	30	SPX15	0.996023	0.676274
B9	31	SPX15	1.13248	0.812581
B9	32	SPX15	1.27465	0.954606
B9	33	SPX15	1.39917	1.07899
B9	34	SPX15	1.50413	1.1838
B9	35	SPX15	1.60359	1.28311
B9	36	SPX15	1.67675	1.35612
B9	37	SPX15	1.74465	1.42387
B9	38	SPX15	1.80518	1.48426
B9	39	SPX15	1.84044	1.51938
B9	40	SPX15	1.8859	1.56469
B10	1	SPX16	0.295048	-0.00823221
B10	2	SPX16	0.301496	-0.00196631
B10	3	SPX16	0.306073	0.00242891
B10	4	SPX16	0.304981	0.00115596
B10	5	SPX16	0.305185	0.0011787
B10	6	SPX16	0.304243	5.47653e-05
B10	7	SPX16	0.305263	0.000893193
B10	8	SPX16	0.303503	-0.00104897
B10	9	SPX16	0.303902	-0.000831111
B10	10	SPX16	0.306988	0.00207384
B10	11	SPX16	0.304175	-0.000921384
B10	12	SPX16	0.304603	-0.000674443
B10	13	SPX16	0.304951	-0.000508564
B10	14	SPX16	0.303454	-0.002187
B10	15	SPX16	0.302793	-0.00302895
B10	16	SPX16	0.305154	-0.000849654
B10	17	SPX16	0.304617	-0.00156852
B10	18	SPX16	0.304671	-0.00169553
B10	19	SPX16	0.306141	-0.000408046
B10	20	SPX16	0.301844	-0.00488582
B10	21	SPX16	0.304852	-0.00206008
B10	22	SPX16	0.312245	0.00515175
B10	23	SPX16	0.315006	0.00773094
B10	24	SPX16	0.32348	0.0160235
B10	25	SPX16	0.343898	0.0362603
B10	26	SPX16	0.384727	0.0769078
B10	27	SPX16	0.450209	0.142208
B10	28	SPX16	0.565205	0.257022
B10	29	SPX16	0.758539	0.450175
B10	30	SPX16	1.0222	0.713653
B10	31	SPX16	1.31878	1.01005
B10	32	SPX16	1.59182	1.28291
B10	33	SPX16	1.78149	1.4724
B10	34	SPX16	1.93783	1.62856
B10	35	SPX16	2.06126	1.7518
B10	36	SPX16	2.16589	1.85626
B10	37	SPX16	2.24121	1.9314
B10	38	SPX16	2.30279	1.99279
B10	39	SPX16	2.35847	2.04829
B10	40	SPX16	2.39739	2.08703
B11	1	SPX16	0.291317	-0.00202157
B11	2	SPX16	0.29517	0.00145797
B11	3	SPX16	0.294849	0.000764294
B11	4	SPX16	0.298136	0.00367911
B11	5	SPX16	0.293284	-0.00154566
B11	6	SPX16	0.295571	0.000368458
B11	7	SPX16	0.295652	7.71396e-05
B11	8	SPX16	0.299123	0.00317452
B11	9	SPX16	0.297273	0.000952552
B11	10	SPX16	0.295209	-0.00148403
B11	11	SPX16	0.298911	0.00184483
B11	12	SPX16	0.297006	-0.000433287
B11	13	SPX16	0.298158	0.00034658
B11	14	SPX16	0.296232	-0.00195246
B11	15	SPX16	0.297205	-0.0013515
B11	16	SPX16	0.295662	-0.00326773
B11	17	SPX16	0.296416	-0.00288617
B11	18	SPX16	0.294889	-0.00478559
B11	19	SPX16	0.298079	-0.0019685
B11	20	SPX16	0.297441	-0.00297975
B11	21	SPX16	0.298385	-0.00240781
B11	22	SPX16	0.300333	-0.000832494
B11	23	SPX16	0.303827	0.00228802
B11	24	SPX16	0.314311	0.0123995
B11	25	SPX16	0.3233	0.0210163
B11	26	SPX16	0.349394	0.0467372
B11	27	SPX16	0.397702	0.094673
B11	28	SPX16	0.479635	0.176233
B11	29	SPX16	0.628665	0.32489
B11	30	SPX16	0.844802	0.540654
B11	31	SPX16	1.12228	0.817761
B11	32	SPX16	1.42422	1.11932
B11	33	SPX16	1.65161	1.34635
B11	34	SPX16	1.83826	1.53262
B11	35	SPX16	1.98129	1.67528
B11	36	SPX16	2.10293	1.79654
B11	37	SPX16	2.18703	1.88027
B11	38	SPX16	2.26229	1.95516
B11	39	SPX16	2.32121	2.01371
B11	40	SPX16	2.37212	2.06425
B12	1	SPX16	0.301512	-0.00433899
B12	2	SPX16	0.303313	-0.00295589
B12	3	SPX16	0.30846	0.00177309
B12	4	SPX16	0.307113	7.84469e-06
B12	5	SPX16	0.309005	0.00148196
B12	6	SPX16	0.307853	-8.85835e-05
B12	7	SPX16	0.3091	0.000740553
B12	8	SPX16	0.306881	-0.00189665
B12	9	SPX16	0.309145	-5.04185e-05
B12	10	SPX16	0.308571	-0.00104247
B12	11	SPX16	0.3132	0.0031681
B12	12	SPX16	0.308312	-0.00213743
B12	13	SPX16	0.31088	1.23098e-05
B12	14	SPX16	0.310984	-0.000302278
B12	15	SPX16	0.309913	-0.00179093
B12	16	SPX16	0.312058	-6.39362e-05
B12	17	SPX16	0.311056	-0.00148431
B12	18	SPX16	0.31256	-0.000398068
B12	19	SPX16	0.309354	-0.0040225
B12	20	SPX16	0.312583	-0.00121181
B12	21	SPX16	0.314283	7.00852e-05
B12	22	SPX16	0.318058	0.00342699
B12	23	SPX16	0.318857	0.00380844
B12	24	SPX16	0.328049	0.0125818
B12	25	SPX16	0.34237	0.0264848
B12	26	SPX16	0.367353	0.0510504
B12	27	SPX16	0.411792	0.095071
B12	28	SPX16	0.492712	0.175572
B12	29	SPX16	0.636711	0.319153
B12	30	SPX16	0.848459	0.530484
B12	31	SPX16	1.13063	0.812234
B12	32	SPX16	1.43697	1.11816
B12	33	SPX16	1.65844	1.33921
B12	34	SPX16	1.84823	1.52858
B12	35	SPX16	2.00002	1.67995
B12	36	SPX16	2.11514	1.79465
B12	37	SPX16	2.20483	1.88393
B12	38	SPX16	2.28494	1.96362
B12	39	SPX16	2.35033	2.02859
B12	40	SPX16	2.40042	2.07826
C1	1	SPX13	0.297821	-0.00272007
C1	2	SPX13	0.299122	-0.00174223
C1	3	SPX13	0.301877	0.000689466
C1	4	SPX13	0.300906	-0.000604638
C1	5	SPX13	0.30373	0.00189629
C1	6	SPX13	0.302199	4.23168e-05
C1	7	SPX13	0.301707	-0.000772863
C1	8	SPX13	0.300061	-0.00274259
C1	9	SPX13	0.303511	0.000385022
C1	10	SPX13	0.303023	-0.00042682
C1	11	SPX13	0.304049	0.000276249
C1	12	SPX13	0.307495	0.003399
C1	13	SPX13	0.306585	0.00216641
C1	14	SPX13	0.303572	-0.00116996
C1	15	SPX13	0.304405	-0.000660278
C1	16	SPX13	0.302457	-0.00293088
C1	17	SPX13	0.303143	-0.00256837
C1	18	SPX13	0.304455	-0.00157937
C1	19	SPX13	0.307815	0.0014568
C1	20	SPX13	0.308342	0.00166062
C1	21	SPX13	0.308488	0.0014836
C1	22	SPX13	0.316955	0.0096278
C1	23	SPX13	0.327457	0.019807
C1	24	SPX13	0.346049	0.0380757
C1	25	SPX13	0.384211	0.0759146
C1	26	SPX13	0.457244	0.148624
C1	27	SPX13	0.581836	0.272893
C1	28	SPX13	0.782593	0.473327
C1	29	SPX13	1.06373	0.754143
C1	30	SPX13	1.36833	1.05842
C1	31	SPX13	1.64261	1.33238
C1	32	SPX13	1.84532	1.53476
C1	33	SPX13	1.96692	1.65604
C1	34	SPX13	2.08165	1.77045
C1	35	SPX13	2.15976	1.84824
C1	36	SPX13	2.22354	1.91169
C1	37	SPX13	2.24911	1.93693
C1	38	SPX13	2.27849	1.96599
C1	39	SPX13	2.30566	1.99284
C1	40	SPX13	2.3133	2.00016
C2	1	SPX13	0.236772	-0.00674756
C2	2	SPX13	0.240493	-0.00330915
C2	3	SPX13	0.244973	0.000888928
C2	4	SPX13	0.242637	-0.00172947
C2	5	SPX13	0.244973	0.000324189
C2	6	SPX13	0.242672	-0.00225909
C2	7	SPX13	0.245312	9.89722e-05
C2	8	SPX13	0.246847	0.00135141
C2	9	SPX13	0.246205	0.000427885
C2	10	SPX13	0.247402	0.00134294
C2	11	SPX13	0.246537	0.000195292
C2	12	SPX13	0.247854	0.00122981
C2	13	SPX13	0.24891	0.00200404
C2	14	SPX13	0.246717	-0.00047161
C2	15	SPX13	0.245765	-0.00170514
C2	16	SPX13	0.246627	-0.00112567
C2	17	SPX13	0.248254	0.000219148
C2	18	SPX13	0.247985	-0.00033218
C2	19	SPX13	0.24439	-0.00420925
C2	20	SPX13	0.250765	0.00188422
C2	21	SPX13	0.251029	0.00186559
C2	22	SPX13	0.256164	0.00671824
C2	23	SPX13	0.269473	0.0197448
C2	24	SPX13	0.286809	0.0367994
C2	25	SPX13	0.320924	0.0706317
C2	26	SPX13	0.389679	0.139105
C2	27	SPX13	0.502879	0.252023
C2	28	SPX13	0.689512	0.438374
C2	29	SPX13	0.964044	0.712623
C2	30	SPX13	1.26658	1.01487
C2	31	SPX13	1.53986	1.28788
C2	32	SPX13	1.73771	1.48545
C2	33	SPX13	1.88295	1.6304
C2	34	SPX13	1.98757	1.73474
C2	35	SPX13	2.06436	1.81125
C2	36	SPX13	2.12796	1.87456
C2	37	SPX13	2.17391	1.92023
C2	38	SPX13	2.19374	1.93978
C2	39	SPX13	2.20491	1.95067
C2	40	SPX13	2.22324	1.96872
C3	1	SPX13	0.316357	-0.00795886
C3	2	SPX13	0.318963	-0.00632702
C3	3	SPX13	0.324872	-0.00139295
C3	4	SPX13	0.326791	-0.000449427
C3	5	SPX13	0.329342	0.00112682
C3	6	SPX13	0.330065	0.000875598
C3	7	SPX13	0.331527	0.00136275
C3	8	SPX13	0.332229	0.00108947
C3	9	SPX13	0.330196	-0.00191853
C3	10	SPX13	0.332805	-0.00028455
C3	11	SPX13	0.336734	0.00267012
C3	12	SPX13	0.33329	-0.00174875
C3	13	SPX13	0.336906	0.000892363
C3	14	SPX13	0.335574	-0.00141487
C3	15	SPX13	0.336721	-0.00124284
C3	16	SPX13	0.33895	1.19632e-05
C3	17	SPX13	0.338232	-0.00168074
C3	18	SPX13	0.341496	0.000607814
C3	19	SPX13	0.340769	-0.00109353
C3	20	SPX13	0.343585	0.000747392
C3	21	SPX13	0.345654	0.00184189
C3	22	SPX13	0.350647	0.00585984
C3	23	SPX13	0.361682	0.0159194
C3	24	SPX13	0.384147	0.0374098
C3	25	SPX13	0.418312	0.0705997
C3	26	SPX13	0.48849	0.139803
C3	27	SPX13	0.614507	0.264845
C3	28	SPX13	0.814212	0.463576
C3	29	SPX13	1.0971	0.74549
C3	30	SPX13	1.43103	1.07844
C3	31	SPX13	1.72102	1.36746
C3	32	SPX13	1.93469	1.58016
C3	33	SPX13	2.08596	1.73045
C3	34	SPX13	2.19304	1.83655
C3	35	SPX13	2.28521	1.92775
C3	36	SPX13	2.35186	1.99342
C3	37	SPX13	2.38516	2.02575
C3	38	SPX13	2.43135	2.07097
C3	39	SPX13	2.443	2.08164
C3	40	SPX13	2.45841	2.09608
C4	1	SPX14	0.264562	-0.0058899
C4	2	SPX14	0.26621	-0.00466468
C4	3	SPX14	0.270616	-0.000681107
C4	4	SPX14	0.269756	-0.00196405
C4	5	SPX14	0.273794	0.00165045
C4	6	SPX14	0.274756	0.00218994
C4	7	SPX14	0.272149	-0.000839569
C4	8	SPX14	0.273351	-6.08801e-05
C4	9	SPX14	0.273588	-0.000246445
C4	10	SPX14	0.275387	0.00112972
C4	11	SPX14	0.277424	0.00274308
C4	12	SPX14	0.278166	0.00306222
C4	13	SPX14	0.276286	0.000759588
C4	14	SPX14	0.275312	-0.000637292
C4	15	SPX14	0.27661	0.00023736
C4	16	SPX14	0.273622	-0.00317368
C4	17	SPX14	0.275496	-0.00172238
C4	18	SPX14	0.278686	0.0010451
C4	19	SPX14	0.276986	-0.00107761
C4	20	SPX14	0.280565	0.00207841
C4	21	SPX14	0.276103	-0.00280677
C4	22	SPX14	0.275996	-0.0033365
C4	23	SPX14	0.281271	0.00151566
C4	24	SPX14	0.280165	-1.38664e-05
C4	25	SPX14	0.277811	-0.00279068
C4	26	SPX14	0.278829	-0.00219576
C4	27	SPX14	0.279814	-0.00163349
C4	28	SPX14	0.280317	-0.00155289
C4	29	SPX14	0.281599	-0.000693617
C4	30	SPX14	0.283398	0.000682132
C4	31	SPX14	0.283369	0.000230074
C4	32	SPX14	0.291665	0.00810285
C4	33	SPX14	0.299082	0.0150969
C4	34	SPX14	0.318149	0.0337413
C4	35	SPX14	0.354223	0.0693921
C4	36	SPX14	0.422169	0.136915
C4	37	SPX14	0.534674	0.248998
C4	38	SPX14	0.723547	0.437448
C4	39	SPX14	0.970492	0.68397
C4	40	SPX14	1.23956	0.952611
C5	1	SPX14	0.290259	-0.0144489
C5	2	SPX14	0.29711	-0.00782408
C5	3	SPX14	0.30149	-0.00366947
C5	4	SPX14	0.301064	-0.00432225
C5	5	SPX14	0.306085	0.000472395
C5	6	SPX14	0.305085	-0.000752882
C5	7	SPX14	0.305239	-0.000825077
C5	8	SPX14	0.305519	-0.000771269
C5	9	SPX14	0.30739	0.00087309
C5	10	SPX14	0.306216	-0.000527037
C5	11	SPX14	0.307972	0.00100366
C5	12	SPX14	0.308888	0.0016933
C5	13	SPX14	0.309805	0.00238401
C5	14	SPX14	0.310124	0.00247719
C5	15	SPX14	0.310975	0.00310219
C5	16	SPX14	0.308275	0.000175647
C5	17	SPX14	0.308508	0.000182696
C5	18	SPX14	0.306408	-0.00214336
C5	19	SPX14	0.311391	0.00261358
C5	20	SPX14	0.307964	-0.00103939
C5	21	SPX14	0.309938	0.000708024
C5	22	SPX14	0.309719	0.000263359
C5	23	SPX14	0.312556	0.00287462
C5	24	SPX14	0.310674	0.000766514
C5	25	SPX14	0.308861	-0.00127269
C5	26	SPX14	0.309042	-0.00131822
C5	27	SPX14	0.312316	0.0017301
C5	28	SPX14	0.310948	0.000135393
C5	29	SPX14	0.309711	-0.0013272
C5	30	SPX14	0.312137	0.000872525
C5	31	SPX14	0.310684	-0.000806314
C5	32	SPX14	0.315886	0.00416923
C5	33	SPX14	0.312008	6.55549e-05
C5	34	SPX14	0.309494	-0.00267466
C5	35	SPX14	0.313746	0.00135102
C5	36	SPX14	0.310931	-0.00168993
C5	37	SPX14	0.311583	-0.00126392
C5	38	SPX14	0.31273	-0.000343702
C5	39	SPX14	0.310133	-0.00316671
C5	40	SPX14	0.310844	-0.00268119
C6	1	SPX14	0.259982	-0.0111626
C6	2	SPX14	0.263559	-0.00797915
C6	3	SPX14	0.270638	-0.00129315
C6	4	SPX14	0.268739	-0.00358539
C6	5	SPX14	0.270927	-0.00178968
C6	6	SPX14	0.273692	0.000582171
C6	7	SPX14	0.275402	0.00189887
C6	8	SPX14	0.275062	0.0011655
C6	9	SPX14	0.276132	0.00184264
C6	10	SPX14	0.27492	0.000237667
C6	11	SPX14	0.273573	-0.00150213
C6	12	SPX14	0.275466	-2.44482e-06
C6	13	SPX14	0.276925	0.00106353
C6	14	SPX14	0.275129	-0.00112453
C6	15	SPX14	0.277623	0.000976122
C6	16	SPX14	0.275792	-0.00124778
C6	17	SPX14	0.276821	-0.000611919
C6	18	SPX14	0.280084	0.00225817
C6	19	SPX14	0.28058	0.00236054
C6	20	SPX14	0.281164	0.00255214
C6	21	SPX14	0.285002	0.00599735
C6	22	SPX14	0.281107	0.00170937
C6	23	SPX14	0.277673	-0.00211755
C6	24	SPX14	0.280621	0.000436695
C6	25	SPX14	0.274715	-0.00586229
C6	26	SPX14	0.281093	0.000123269
C6	27	SPX14	0.276339	-0.00502445
C6	28	SPX14	0.280203	-0.0015532
C6	29	SPX14	0.283613	0.00146387
C6	30	SPX14	0.280509	-0.00203265
C6	31	SPX14	0.286014	0.00307926
C6	32	SPX14	0.291808	0.00848
C6	33	SPX14	0.305222	0.0215006
C6	34	SPX14	0.325851	0.0417373
C6	35	SPX14	0.371661	0.0871543
C6	36	SPX14	0.446338	0.161438
C6	37	SPX14	0.581288	0.295995
C6	38	SPX14	0.785561	0.499875
C6	39	SPX14	1.04015	0.754067
C6	40	SPX14	1.29136	1.00489
C7	1	SPX15	0.265012	0.0017046
C7	2	SPX15	0.264031	1.20456e-05
C7	3	SPX15	0.267432	0.00270139
C7	4	SPX15	0.27094	0.00549805
C7	5	SPX15	0.273204	0.00705032
C7	6	SPX15	0.268919	0.00205388
C7	7	SPX15	0.267509	-6.75881e-05
C7	8	SPX15	0.265381	-0.00290696
C7	9	SPX15	0.267228	-0.0017719
C7	10	SPX15	0.267734	-0.00197779
C7	11	SPX15	0.26622	-0.004203
C7	12	SPX15	0.268629	-0.00250584
C7	13	SPX15	0.269196	-0.00265072
C7	14	SPX15	0.267254	-0.00530413
C7	15	SPX15	0.268096	-0.00517347
C7	16	SPX15	0.269765	-0.00421635
C7	17	SPX15	0.27024	-0.00445274
C7	18	SPX15	0.268207	-0.00719773
C7	19	SPX15	0.284617	0.00850093
C7	20	SPX15	0.278987	0.00215903
C7	21	SPX15	0.283337	0.00579791
C7	22	SPX15	0.286917	0.00866672
C7	23	SPX15	0.294451	0.015489
C7	24	SPX15	0.310254	0.03058
C7	25	SPX15	0.334457	0.054071
C7	26	SPX15	0.388316	0.107218
C7	27	SPX15	0.463796	0.181987
C7	28	SPX15	0.567613	0.285093
C7	29	SPX15	0.71568	0.432448
C7	30	SPX15	0.890975	0.607031
C7	31	SPX15	1.07228	0.787623
C7	32	SPX15	1.2535	0.968137
C7	33	SPX15	1.40698	1.1209
C7	34	SPX15	1.55244	1.26565
C7	35	SPX15	1.69151	1.40401
C7	36	SPX15	1.79924	1.51103
C7	37	SPX15	1.88134	1.59242
C7	38	SPX15	1.96057	1.67094
C7	39	SPX15	2.02748	1.73713
C7	40	SPX15	2.08879	1.79773
C8	1	SPX15	0.278928	-0.00417213
C8	2	SPX15	0.28216	-0.00175249
C8	3	SPX15	0.285536	0.000809598
C8	4	SPX15	0.286405	0.000865731
C8	5	SPX15	0.287396	0.00104364
C8	6	SPX15	0.28533	-0.00183597
C8	7	SPX15	0.28769	-0.000288885
C8	8	SPX15	0.290857	0.00206501
C8	9	SPX15	0.29075	0.00114479
C8	10	SPX15	0.290162	-0.000256594
C8	11	SPX15	0.292503	0.00127094
C8	12	SPX15	0.292053	7.69341e-06
C8	13	SPX15	0.291986	-0.000872086
C8	14	SPX15	0.293373	-0.000298436
C8	15	SPX15	0.293391	-0.00109325
C8	16	SPX15	0.292903	-0.00239434
C8	17	SPX15	0.293771	-0.0023397
C8	18	SPX15	0.293034	-0.00389051
C8	19	SPX15	0.296069	-0.00166825
C8	20	SPX15	0.294921	-0.00362923
C8	21	SPX15	0.301374	0.0020098
C8	22	SPX15	0.309527	0.00935007
C8	23	SPX15	0.317036	0.0160462
C8	24	SPX15	0.338281	0.0364775
C8	25	SPX15	0.369966	0.0673497
C8	26	SPX15	0.430701	0.127271
C8	27	SPX15	0.532686	0.228443
C8	28	SPX15	0.669678	0.364622
C8	29	SPX15	0.847195	0.541326
C8	30	SPX15	1.0258	0.719114
C8	31	SPX15	1.19874	0.891245
C8	32	SPX15	1.37205	1.06374
C8	33	SPX15	1.51251	1.20339
C8	34	SPX15	1.64534	1.3354
C8	35	SPX15	1.76459	1.45384
C8	36	SPX15	1.85312	1.54156
C8	37	SPX15	1.92897	1.61659
C8	38	SPX15	1.99034	1.67715
C8	39	SPX15	2.04019	1.72619
C8	40	SPX15	2.09155	1.77673
C9	1	SPX15	0.313659	-0.0036422
C9	2	SPX15	0.323049	0.00553374
C9	3	SPX15	0.317503	-0.000224704
C9	4	SPX15	0.317324	-0.000617422
C9	5	SPX15	0.319701	0.00154666
C9	6	SPX15	0.320874	0.0025064
C9	7	SPX15	0.320001	0.00142024
C9	8	SPX15	0.318111	-0.000682594
C9	9	SPX15	0.320283	0.0012763
C9	10	SPX15	0.318022	-0.00119847
C9	11	SPX15	0.318211	-0.00122292
C9	12	SPX15	0.320755	0.00110859
C9	13	SPX15	0.31753	-0.00233007
C9	14	SPX15	0.31727	-0.0028026
C9	15	SPX15	0.320096	-0.000189846
C9	16	SPX15	0.318191	-0.00230818
C9	17	SPX15	0.320927	0.000214723
C9	18	SPX15	0.317962	-0.00296353
C9	19	SPX15	0.320964	-0.000175297
C9	20	SPX15	0.321981	0.000629114
C9	21	SPX15	0.327579	0.00601361
C9	22	SPX15	0.331244	0.00946565
C9	23	SPX15	0.34548	0.0234883
C9	24	SPX15	0.372108	0.0499028
C9	25	SPX15	0.414338	0.0919194
C9	26	SPX15	0.485958	0.163326
C9	27	SPX15	0.600773	0.277929
C9	28	SPX15	0.733397	0.410339
C9	29	SPX15	0.893194	0.569923
C9	30	SPX15	1.02872	0.705236
C9	31	SPX15	1.16222	0.838521
C9	32	SPX15	1.3071	0.983189
C9	33	SPX15	1.42863	1.1045
C9	34	SPX15	1.53717	1.21283
C9	35	SPX15	1.62978	1.30523
C9	36	SPX15	1.71258	1.38782
C9	37	SPX15	1.77851	1.45353
C9	38	SPX15	1.83333	1.50814
C9	39	SPX15	1.8666	1.54119
C9	40	SPX15	1.9128	1.58719
C10	1	SPX16	0.247009	-0.00658225
C10	2	SPX16	0.252906	-0.00137318
C10	3	SPX16	0.255854	0.00088703
C10	4	SPX16	0.255995	0.000340373
C10	5	SPX16	0.257103	0.000759699
C10	6	SPX16	0.255918	-0.00111373
C10	7	SPX16	0.259921	0.00220179
C10	8	SPX16	0.258214	-0.000193179
C10	9	SPX16	0.260456	0.00136063
C10	10	SPX16	0.259471	-0.000312255
C10	11	SPX16	0.260288	-0.000183949
C10	12	SPX16	0.259496	-0.00166404
C10	13	SPX16	0.26131	-0.000537599
C10	14	SPX16	0.260921	-0.00161533
C10	15	SPX16	0.261625	-0.00159968
C10	16	SPX16	0.26249	-0.00142274
C10	17	SPX16	0.264329	-0.0002709
C10	18	SPX16	0.264595	-0.000693907
C10	19	SPX16	0.264555	-0.0014217
C10	20	SPX16	0.266624	-4.11026e-05
C10	21	SPX16	0.26965	0.00229755
C10	22	SPX16	0.271264	0.00322304
C10	23	SPX16	0.277499	0.00877021
C10	24	SPX16	0.293035	0.0236184
C10	25	SPX16	0.317772	0.0476672
C10	26	SPX16	0.365751	0.0949575
C10	27	SPX16	0.449115	0.177634
C10	28	SPX16	0.588363	0.316193
C10	29	SPX16	0.811217	0.538359
C10	30	SPX16	1.09678	0.823233
C10	31	SPX16	1.38819	1.11395
C10	32	SPX16	1.64358	1.36866
C10	33	SPX16	1.82146	1.54585
C10	34	SPX16	1.96243	1.68613
C10	35	SPX16	2.07594	1.79895
C10	36	SPX16	2.17021	1.89254
C10	37	SPX16	2.23713	1.95877
C10	38	SPX16	2.29854	2.01949
C10	39	SPX16	2.34526	2.06552
C10	40	SPX16	2.37512	2.09469
C11	1	SPX16	0.227533	-0.0112204
C11	2	SPX16	0.230489	-0.00887027
C11	3	SPX16	0.238306	-0.0016588
C11	4	SPX16	0.24175	0.00117888
C11	5	SPX16	0.244207	0.00303061
C11	6	SPX16	0.242032	0.000249751
C11	7	SPX16	0.242381	-7.43567e-06
C11	8	SPX16	0.243823	0.000829138
C11	9	SPX16	0.242564	-0.00103661
C11	10	SPX16	0.244691	0.000484654
C11	11	SPX16	0.243137	-0.00167498
C11	12	SPX16	0.244013	-0.00140501
C11	13	SPX16	0.244966	-0.00105783
C11	14	SPX16	0.245018	-0.00161185
C11	15	SPX16	0.248986	0.00175119
C11	16	SPX16	0.249467	0.00162635
C11	17	SPX16	0.248175	-0.000272063
C11	18	SPX16	0.247291	-0.00176208
C11	19	SPX16	0.247013	-0.00264592
C11	20	SPX16	0.25019	-7.39286e-05
C11	21	SPX16	0.251183	0.000312556
C11	22	SPX16	0.255219	0.00374338
C11	23	SPX16	0.263031	0.0109488
C11	24	SPX16	0.274516	0.0218282
C11	25	SPX16	0.298075	0.0447811
C11	26	SPX16	0.345163	0.0912637
C11	27	SPX16	0.427085	0.17258
C11	28	SPX16	0.56046	0.305349
C11	29	SPX16	0.774459	0.518741
C11	30	SPX16	1.04887	0.792552
C11	31	SPX16	1.33654	1.07961
C11	32	SPX16	1.58869	1.33115
C11	33	SPX16	1.77026	1.51212
C11	34	SPX16	1.91495	1.6562
C11	35	SPX16	2.0395	1.78015
C11	36	SPX16	2.13092	1.87096
C11	37	SPX16	2.20671	1.94615
C11	38	SPX16	2.26943	2.00826
C11	39	SPX16	2.3229	2.06113
C11	40	SPX16	2.36701	2.10463
C12	1	SPX16	0.318272	-0.00364982
C12	2	SPX16	0.318879	-0.0032622
C12	3	SPX16	0.320302	-0.00205824
C12	4	SPX16	0.323423	0.000842362
C12	5	SPX16	0.324018	0.0012185
C12	6	SPX16	0.323379	0.000360081
C12	7	SPX16	0.321498	-0.00174083
C12	8	SPX16	0.324078	0.000619252
C12	9	SPX16	0.323865	0.000187392
C12	10	SPX16	0.327077	0.00317955
C12	11	SPX16	0.326102	0.00198502
C12	12	SPX16	0.325442	0.00110496
C12	13	SPX16	0.322753	-0.00180294
C12	14	SPX16	0.327541	0.00276567
C12	15	SPX16	0.320441	-0.00455452
C12	16	SPX16	0.323195	-0.00201967
C12	17	SPX16	0.325854	0.000419859
C12	18	SPX16	0.322212	-0.00344207
C12	19	SPX16	0.322063	-0.00381069
C12	20	SPX16	0.327104	0.00101068
C12	21	SPX16	0.326929	0.000616038
C12	22	SPX16	0.331652	0.00511959
C12	23	SPX16	0.33818	0.0114286
C12	24	SPX16	0.348221	0.0212494
C12	25	SPX16	0.365859	0.0386681
C12	26	SPX16	0.406097	0.0786863
C12	27	SPX16	0.481324	0.153694
C12	28	SPX16	0.60434	0.276491
C12	29	SPX16	0.804335	0.476266
C12	30	SPX16	1.05139	0.723104
C12	31	SPX16	1.3219	0.993387
C12	32	SPX16	1.56103	1.2323
C12	33	SPX16	1.74141	1.41246
C12	34	SPX16	1.8924	1.56324
C12	35	SPX16	2.02234	1.69295
C12	36	SPX16	2.13488	1.80527
C12	37	SPX16	2.21734	1.88752
C12	38	SPX16	2.28471	1.95466
C12	39	SPX16	2.32532	1.99506
C12	40	SPX16	2.37679	2.0463
D1	1	SPX13	0.320931	-0.000961946
D1	2	SPX13	0.321334	-0.00104278
D1	3	SPX13	0.324144	0.00128355
D1	4	SPX13	0.32503	0.00168542
D1	5	SPX13	0.322325	-0.00150383
D1	6	SPX13	0.325271	0.000958401
D1	7	SPX13	0.323525	-0.00127118
D1	8	SPX13	0.325203	-7.73113e-05
D1	9	SPX13	0.326779	0.00101514
D1	10	SPX13	0.326074	-0.000174489
D1	11	SPX13	0.329153	0.00242119
D1	12	SPX13	0.32595	-0.00126551
D1	13	SPX13	0.327836	0.00013575
D1	14	SPX13	0.327344	-0.000839959
D1	15	SPX13	0.325715	-0.00295251
D1	16	SPX13	0.326621	-0.00253067
D1	17	SPX13	0.328074	-0.00156145
D1	18	SPX13	0.328349	-0.00177061
D1	19	SPX13	0.330932	0.000328356
D1	20	SPX13	0.333812	0.00272481
D1	21	SPX13	0.33195	0.000379236
D1	22	SPX13	0.335071	0.00301566
D1	23	SPX13	0.342253	0.00971417
D1	24	SPX13	0.357081	0.0240581
D1	25	SPX13	0.383534	0.0500272
D1	26	SPX13	0.435044	0.101053
D1	27	SPX13	0.530907	0.196432
D1	28	SPX13	0.687389	0.35243
D1	29	SPX13	0.929182	0.59374
D1	30	SPX13	1.241	0.905074
D1	31	SPX13	1.55441	1.218
D1	32	SPX13	1.80597	1.46907
D1	33	SPX13	1.97147	1.6341
D1	34	SPX13	2.10321	1.76535
D1	35	SPX13	2.20037	1.86202
D1	36	SPX13	2.26884	1.93001
D1	37	SPX13	2.31648	1.97716
D1	38	SPX13	2.35454	2.01474
D1	39	SPX13	2.3757	2.03542
D1	40	SPX13	2.39288	2.05212
D2	1	SPX13	0.264683	-0.00318141
D2	2	SPX13	0.264991	-0.00298752
D2	3	SPX13	0.27088	0.00278691
D2	4	SPX13	0.270268	0.00206062
D2	5	SPX13	0.270119	0.00179749
D2	6	SPX13	0.268039	-0.000395907
D2	7	SPX13	0.267205	-0.00134491
D2	8	SPX13	0.267433	-0.00123095
D2	9	SPX13	0.267101	-0.00167614
D2	10	SPX13	0.266362	-0.00253019
D2	11	SPX13	0.26867	-0.000335824
D2	12	SPX13	0.268189	-0.000931309
D2	13	SPX13	0.26964	0.000406362
D2	14	SPX13	0.269206	-0.000141857
D2	15	SPX13	0.268741	-0.000720773
D2	16	SPX13	0.269731	0.000154635
D2	17	SPX13	0.270302	0.000612036
D2	18	SPX13	0.268309	-0.00149493
D2	19	SPX13	0.268061	-0.00185701
D2	20	SPX13	0.267845	-0.00218794
D2	21	SPX13	0.272909	0.00276264
D2	22	SPX13	0.274528	0.00426705
D2	23	SPX13	0.283044	0.0126694
D2	24	SPX13	0.299623	0.029134
D2	25	SPX13	0.332362	0.0617591
D2	26	SPX13	0.390466	0.119749
D2	27	SPX13	0.496581	0.22575
D2	28	SPX13	0.671793	0.400847
D2	29	SPX13	0.932824	0.661765
D2	30	SPX13	1.23913	0.96796
D2	31	SPX13	1.51279	1.2415
D2	32	SPX13	1.72885	1.45745
D2	33	SPX13	1.87707	1.60556
D2	34	SPX13	2.01454	1.74292
D2	35	SPX13	2.10269	1.83095
D2	36	SPX13	2.18129	1.90943
D2	37	SPX13	2.23409	1.96211
D2	38	SPX13	2.26757	1.99548
D2	39	SPX13	2.30345	2.03125
D2	40	SPX13	2.32088	2.04856
D3	1	SPX13	0.275184	-0.00487002
D3	2	SPX13	0.275596	-0.00437596
D3	3	SPX13	0.28098	0.00108971
D3	4	SPX13	0.27982	1.17301e-05
D3	5	SPX13	0.280373	0.000646584
D3	6	SPX13	0.280894	0.00125003
D3	7	SPX13	0.27746	-0.00210211
D3	8	SPX13	0.279788	0.000308013
D3	9	SPX13	0.281129	0.00173135
D3	10	SPX13	0.278321	-0.000995084
D3	11	SPX13	0.279544	0.000309726
D3	12	SPX13	0.278575	-0.000576591
D3	13	SPX13	0.279796	0.000726163
D3	14	SPX13	0.279962	0.000973944
D3	15	SPX13	0.277377	-0.00152882
D3	16	SPX13	0.276084	-0.00274001
D3	17	SPX13	0.276287	-0.00245444
D3	18	SPX13	0.277573	-0.0010869
D3	19	SPX13	0.277431	-0.00114695
D3	20	SPX13	0.278528	3.2635e-05
D3	21	SPX13	0.278328	-8.58842e-05
D3	22	SPX13	0.283968	0.00563691
D3	23	SPX13	0.289216	0.0109667
D3	24	SPX13	0.299934	0.0217671
D3	25	SPX13	0.329311	0.051226
D3	26	SPX13	0.37107	0.0930672
D3	27	SPX13	0.459265	0.181344
D3	28	SPX13	0.607396	0.329557
D3	29	SPX13	0.842523	0.564766
D3	30	SPX13	1.14402	0.866348
D3	31	SPX13	1.45854	1.18094
D3	32	SPX13	1.72304	1.44553
D3	33	SPX13	1.90267	1.62524
D3	34	SPX13	2.04407	1.76673
D3	35	SPX13	2.15747	1.88021
D3	36	SPX13	2.23096	1.95377
D3	37	SPX13	2.29702	2.01992
D3	38	SPX13	2.34546	2.06844
D3	39	SPX13	2.36816	2.09122
D3	40	SPX13	2.39734	2.12048
D4	1	SPX14	0.254168	-0.00314239
D4	2	SPX14	0.253614	-0.00395045
D4	3	SPX14	0.259773	0.0019541
D4	4	SPX14	0.256849	-0.00122515
D4	5	SPX14	0.258894	0.00056525
D4	6	SPX14	0.260845	0.00226172
D4	7	SPX14	0.259634	0.000796304
D4	8	SPX14	0.259081	-1.08043e-05
D4	9	SPX14	0.259438	9.16545e-05
D4	10	SPX14	0.257867	-0.00173419
D4	11	SPX14	0.260271	0.000415394
D4	12	SPX14	0.260571	0.000460483
D4	13	SPX14	0.261526	0.0011611
D4	14	SPX14	0.259725	-0.000894542
D4	15	SPX14	0.258257	-0.00261724
D4	16	SPX14	0.261416	0.000287266
D4	17	SPX14	0.262182	0.000798732
D4	18	SPX14	0.260385	-0.00125238
D4	19	SPX14	0.261097	-0.000795398
D4	20	SPX14	0.26375	0.00160297
D4	21	SPX14	0.260847	-0.00155494
D4	22	SPX14	0.262079	-0.000576594
D4	23	SPX14	0.263772	0.000861009
D4	24	SPX14	0.26097	-0.00219555
D4	25	SPX14	0.262516	-0.000904156
D4	26	SPX14	0.262453	-0.00122111
D4	27	SPX14	0.261405	-0.00252377
D4	28	SPX14	0.263049	-0.001134
D4	29	SPX14	0.265829	0.00139127
D4	30	SPX14	0.263762	-0.000930896
D4	31	SPX14	0.264161	-0.000786297
D4	32	SPX14	0.267508	0.0023065
D4	33	SPX14	0.27086	0.00540325
D4	34	SPX14	0.280746	0.0150354
D4	35	SPX14	0.298207	0.0322412
D4	36	SPX14	0.326435	0.060215
D4	37	SPX14	0.38867	0.122195
D4	38	SPX14	0.498668	0.231939
D4	39	SPX14	0.684491	0.417507
D4	40	SPX14	0.950855	0.683617
D5	1	SPX14	0.28858	-0.0160044
D5	2	SPX14	0.29694	-0.00782137
D5	3	SPX14	0.299844	-0.00509457
D5	4	SPX14	0.301121	-0.0039948
D5	5	SPX14	0.305325	3.17412e-05
D5	6	SPX14	0.3054	-7.06225e-05
D5	7	SPX14	0.305863	0.000215755
D5	8	SPX14	0.305014	-0.00081063
D5	9	SPX14	0.306098	9.58452e-05
D5	10	SPX14	0.305494	-0.000685862
D5	11	SPX14	0.308317	0.00196047
D5	12	SPX14	0.30612	-0.000413783
D5	13	SPX14	0.308706	0.00199494
D5	14	SPX14	0.310746	0.00385726
D5	15	SPX14	0.306726	-0.000340328
D5	16	SPX14	0.306357	-0.00088624
D5	17	SPX14	0.310358	0.00293794
D5	18	SPX14	0.310574	0.00297622
D5	19	SPX14	0.307573	-0.000201986
D5	20	SPX14	0.305669	-0.00228355
D5	21	SPX14	0.310166	0.00203624
D5	22	SPX14	0.311434	0.00312681
D5	23	SPX14	0.307223	-0.00126146
D5	24	SPX14	0.307745	-0.000916938
D5	25	SPX14	0.310934	0.00209567
D5	26	SPX14	0.309482	0.000465785
D5	27	SPX14	0.312411	0.00321753
D5	28	SPX14	0.308916	-0.000455032
D5	29	SPX14	0.31042	0.000871923
D5	30	SPX14	0.310206	0.000480805
D5	31	SPX14	0.308384	-0.0015188
D5	32	SPX14	0.311676	0.00159632
D5	33	SPX14	0.307018	-0.00323946
D5	34	SPX14	0.309886	-0.000548568
D5	35	SPX14	0.312541	0.00192977
D5	36	SPX14	0.309196	-0.00159304
D5	37	SPX14	0.31081	-0.000155961
D5	38	SPX14	0.310291	-0.000852761
D5	39	SPX14	0.306754	-0.00456663
D5	40	SPX14	0.306086	-0.00541194
D6	1	SPX14	0.329823	-0.0244851
D6	2	SPX14	0.340464	-0.0133567
D6	3	SPX14	0.347026	-0.00630655
D6	4	SPX14	0.347526	-0.00531953
D6	5	SPX14	0.351287	-0.00107151
D6	6	SPX14	0.352944	0.00107343
D6	7	SPX14	0.352102	0.000718662
D6	8	SPX14	0.354761	0.0038654
D6	9	SPX14	0.355083	0.00467421
D6	10	SPX14	0.354696	0.00477503
D6	11	SPX14	0.353542	0.00410785
D6	12	SPX14	0.351358	0.00241138
D6	13	SPX14	0.350297	0.0018378
D6	14	SPX14	0.34996	0.00198863
D6	15	SPX14	0.344768	-0.00271596
D6	16	SPX14	0.343796	-0.00320105
D6	17	SPX14	0.3459	-0.000609649
D6	18	SPX14	0.347137	0.00111448
D6	19	SPX14	0.345579	4.40068e-05
D6	20	SPX14	0.344586	-0.000461261
D6	21	SPX14	0.343922	-0.000638256
D6	22	SPX14	0.341845	-0.00222723
D6	23	SPX14	0.342885	-0.000700184
D6	24	SPX14	0.342696	-0.000401951
D6	25	SPX14	0.342555	-5.52004e-05
D6	26	SPX14	0.341423	-0.000699496
D6	27	SPX14	0.338741	-0.00289423
D6	28	SPX14	0.340241	-0.000907008
D6	29	SPX14	0.340339	-0.000321809
D6	30	SPX14	0.337519	-0.00265411
D6	31	SPX14	0.337147	-0.00253937
D6	32	SPX14	0.340935	0.00173646
D6	33	SPX14	0.338371	-0.000339896
D6	34	SPX14	0.338983	0.000759483
D6	35	SPX14	0.336493	-0.00124323
D6	36	SPX14	0.338943	0.00169352
D6	37	SPX14	0.340088	0.00332603
D6	38	SPX14	0.335954	-0.000320729
D6	39	SPX14	0.337289	0.00150183
D6	40	SPX14	0.337999	0.00269965
D7	1	SPX15	0.230898	-0.012497
D7	2	SPX15	0.238193	-0.00525743
D7	3	SPX15	0.243118	-0.00038841
D7	4	SPX15	0.242262	-0.00129942
D7	5	SPX15	0.244468	0.000850575
D7	6	SPX15	0.245866	0.00219353
D7	7	SPX15	0.244113	0.000384585
D7	8	SPX15	0.246091	0.00230674
D7	9	SPX15	0.244664	0.000824615
D7	10	SPX15	0.243405	-0.000490495
D7	11	SPX15	0.245139	0.00118834
D7	12	SPX15	0.240477	-0.00352916
D7	13	SPX15	0.241969	-0.00209309
D7	14	SPX15	0.244055	-6.32213e-05
D7	15	SPX15	0.2433	-0.000873167
D7	16	SPX15	0.242381	-0.00184847
D7	17	SPX15	0.243931	-0.000354012
D7	18	SPX15	0.244768	0.000427725
D7	19	SPX15	0.241785	-0.00261061
D7	20	SPX15	0.244051	-0.000400676
D7	21	SPX15	0.250282	0.00577463
D7	22	SPX15	0.254641	0.0100779
D7	23	SPX15	0.266088	0.02147
D7	24	SPX15	0.296634	0.0519595
D7	25	SPX15	0.332944	0.0882146
D7	26	SPX15	0.407864	0.163079
D7	27	SPX15	0.521088	0.276247
D7	28	SPX15	0.661707	0.416811
D7	29	SPX15	0.840224	0.595272
D7	30	SPX15	1.00293	0.757923
D7	31	SPX15	1.16425	0.919185
D7	32	SPX15	1.3273	1.08218
D7	33	SPX15	1.47391	1.22874
D7	34	SPX15	1.60788	1.36265
D7	35	SPX15	1.72215	1.47686
D7	36	SPX15	1.80437	1.55903
D7	37	SPX15	1.88429	1.63889
D7	38	SPX15	1.94658	1.70113
D7	39	SPX15	1.99319	1.74768
D7	40	SPX15	2.04797	1.80241
D8	1	SPX15	0.224384	-0.00595846
D8	2	SPX15	0.228961	-0.00221659
D8	3	SPX15	0.232377	0.00036314
D8	4	SPX15	0.23616	0.00331041
D8	5	SPX15	0.233298	-0.000387204
D8	6	SPX15	0.23328	-0.00124099
D8	7	SPX15	0.236015	0.000657489
D8	8	SPX15	0.238462	0.00226928
D8	9	SPX15	0.236385	-0.000644303
D8	10	SPX15	0.235723	-0.00214187
D8	11	SPX15	0.2388	9.9328e-05
D8	12	SPX15	0.237476	-0.00206024
D8	13	SPX15	0.240771	0.000398666
D8	14	SPX15	0.239514	-0.00169405
D8	15	SPX15	0.241177	-0.000867155
D8	16	SPX15	0.242729	-0.000150586
D8	17	SPX15	0.240788	-0.00292782
D8	18	SPX15	0.243822	-0.000729896
D8	19	SPX15	0.245125	-0.000262266
D8	20	SPX15	0.247406	0.00118264
D8	21	SPX15	0.251885	0.00482543
D8	22	SPX15	0.258527	0.0106318
D8	23	SPX15	0.272991	0.02426
D8	24	SPX15	0.301953	0.0523866
D8	25	SPX15	0.34376	0.093357
D8	26	SPX15	0.416963	0.165724
D8	27	SPX15	0.53891	0.286836
D8	28	SPX15	0.692392	0.439482
D8	29	SPX15	0.884303	0.630557
D8	30	SPX15	1.06484	0.81026
D8	31	SPX15	1.23133	0.975915
D8	32	SPX15	1.40237	1.14612
D8	33	SPX15	1.54487	1.28778
D8	34	SPX15	1.66634	1.40841
D8	35	SPX15	1.78655	1.52779
D8	36	SPX15	1.86455	1.60496
D8	37	SPX15	1.93904	1.67861
D8	38	SPX15	2.00078	1.73951
D8	39	SPX15	2.04961	1.7875
D8	40	SPX15	2.1014	1.83845
D9	1	SPX15	0.358311	0.000893952
D9	2	SPX15	0.361063	0.00389906
D9	3	SPX15	0.359461	0.0025513
D9	4	SPX15	0.360252	0.00359572
D9	5	SPX15	0.358645	0.00224241
D9	6	SPX15	0.35505	-0.00109891
D9	7	SPX15	0.356187	0.00029121
D9	8	SPX15	0.351516	-0.00412613
D9	9	SPX15	0.352839	-0.00254918
D9	10	SPX15	0.356067	0.000932442
D9	11	SPX15	0.354644	-0.000236831
D9	12	SPX15	0.354162	-0.000466198
D9	13	SPX15	0.354066	-0.000307687
D9	14	SPX15	0.352576	-0.00154405
D9	15	SPX15	0.350105	-0.0037623
D9	16	SPX15	0.352671	-0.000942263
D9	17	SPX15	0.351151	-0.00220893
D9	18	SPX15	0.352434	-0.000672092
D9	19	SPX15	0.350839	-0.00201317
D9	20	SPX15	0.358047	0.00544777
D9	21	SPX15	0.357212	0.00486688
D9	22	SPX15	0.363349	0.0112578
D9	23	SPX15	0.373936	0.0220984
D9	24	SPX15	0.401201	0.0496166
D9	25	SPX15	0.441231	0.0898999
D9	26	SPX15	0.519987	0.16891
D9	27	SPX15	0.63178	0.280956
D9	28	SPX15	0.775192	0.424622
D9	29	SPX15	0.954858	0.604542
D9	30	SPX15	1.11775	0.767683
D9	31	SPX15	1.26692	0.917112
D9	32	SPX15	1.42482	1.07526
D9	33	SPX15	1.53787	1.18857
D9	34	SPX15	1.6533	1.30425
D9	35	SPX15	1.75781	1.40901
D9	36	SPX15	1.83229	1.48375
D9	37	SPX15	1.89166	1.54337
D9	38	SPX15	1.94832	1.60029
D9	39	SPX15	1.98714	1.63936
D9	40	SPX15	2.03492	1.6874
D10	1	SPX16	0.31002	-0.0044663
D10	2	SPX16	0.315612	0.000973305
D10	3	SPX16	0.31566	0.000869677
D10	4	SPX16	0.318446	0.0035033
D10	5	SPX16	0.315553	0.000458066
D10	6	SPX16	0.312665	-0.00258115
D10	7	SPX16	0.316548	0.00114944
D10	8	SPX16	0.31578	0.000229555
D10	9	SPX16	0.31557	-0.000132549
D10	10	SPX16	0.315538	-0.000317239
D10	11	SPX16	0.315003	-0.00100398
D10	12	SPX16	0.315958	-0.000201319
D10	13	SPX16	0.315458	-0.000852923
D10	14	SPX16	0.31744	0.000976398
D10	15	SPX16	0.315899	-0.000716588
D10	16	SPX16	0.313498	-0.00326988
D10	17	SPX16	0.315986	-0.000933203
D10	18	SPX16	0.313059	-0.00401289
D10	19	SPX16	0.315879	-0.00134431
D10	20	SPX16	0.316808	-0.000567396
D10	21	SPX16	0.319973	0.0024454
D10	22	SPX16	0.323982	0.00630158
D10	23	SPX16	0.331882	0.0140499
D10	24	SPX16	0.350923	0.0329386
D10	25	SPX16	0.383065	0.064929
D10	26	SPX16	0.444322	0.126033
D10	27	SPX16	0.553538	0.235098
D10	28	SPX16	0.724772	0.406179
D10	29	SPX16	0.983828	0.665083
D10	30	SPX16	1.27765	0.958755
D10	31	SPX16	1.54741	1.22837
D10	32	SPX16	1.77675	1.45755
D10	33	SPX16	1.93264	1.61328
D10	34	SPX16	2.06109	1.74158
D10	35	SPX16	2.17082	1.85116
D10	36	SPX16	2.26035	1.94054
D10	37	SPX16	2.32354	2.00357
D10	38	SPX16	2.37629	2.05617
D10	39	SPX16	2.41647	2.09621
D10	40	SPX16	2.45929	2.13887
D11	1	SPX16	0.277232	-0.00203491
D11	2	SPX16	0.280703	0.00101713
D11	3	SPX16	0.281702	0.00159575
D11	4	SPX16	0.280616	9.05609e-05
D11	5	SPX16	0.281305	0.000360431
D11	6	SPX16	0.280948	-0.000416089
D11	7	SPX16	0.282279	0.000495007
D11	8	SPX16	0.28419	0.00198674
D11	9	SPX16	0.28262	-2.8811e-06
D11	10	SPX16	0.28289	-0.000152777
D11	11	SPX16	0.282333	-0.00112873
D11	12	SPX16	0.284466	0.000583985
D11	13	SPX16	0.283283	-0.00101827
D11	14	SPX16	0.283749	-0.000972243
D11	15	SPX16	0.283784	-0.00135662
D11	16	SPX16	0.282515	-0.00304524
D11	17	SPX16	0.284812	-0.00116706
D11	18	SPX16	0.285211	-0.00118797
D11	19	SPX16	0.284357	-0.00246127
D11	20	SPX16	0.288331	0.00109288
D11	21	SPX16	0.289941	0.00228376
D11	22	SPX16	0.292497	0.00442006
D11	23	SPX16	0.301965	0.0134681
D11	24	SPX16	0.314922	0.0260059
D11	25	SPX16	0.342349	0.0530132
D11	26	SPX16	0.395629	0.105874
D11	27	SPX16	0.485295	0.19512
D11	28	SPX16	0.639487	0.348892
D11	29	SPX16	0.873251	0.582237
D11	30	SPX16	1.16559	0.874152
D11	31	SPX16	1.45648	1.16463
D11	32	SPX16	1.7131	1.42083
D11	33	SPX16	1.88437	1.59167
D11	34	SPX16	2.02649	1.73337
D11	35	SPX16	2.14772	1.85419
D11	36	SPX16	2.24061	1.94666
D11	37	SPX16	2.31037	2.016
D11	38	SPX16	2.37195	2.07716
D11	39	SPX16	2.41704	2.12183
D11	40	SPX16	2.45547	2.15984
D12	1	SPX16	1.03928	-0.00679904
D12	2	SPX16	1.03591	-0.00726788
D12	3	SPX16	1.04101	0.000730354
D12	4	SPX16	1.03848	0.0011042
D12	5	SPX16	1.0388	0.00431749
D12	6	SPX16	1.03277	0.00119231
D12	7	SPX16	1.02984	0.00116311
D12	8	SPX16	1.02348	-0.00230301
D12	9	SPX16	1.02386	0.000985384
D12	10	SPX16	1.02057	0.000592715
D12	11	SPX16	1.01397	-0.00310861
D12	12	SPX16	1.01229	-0.00189076
D12	13	SPX16	1.01372	0.00243988
D12	14	SPX16	1.00388	-0.00450107
D12	15	SPX16	1.00239	-0.00308939
D12	16	SPX16	0.997373	-0.00520332
D12	17	SPX16	0.999814	0.000138218
D12	18	SPX16	0.99324	-0.00353616
D12	19	SPX16	0.991785	-0.00209068
D12	20	SPX16	0.992437	0.00146218
D12	21	SPX16	0.99352	0.00544497
D12	22	SPX16	0.991327	0.00615218
D12	23	SPX16	0.995442	0.0131674
D12	24	SPX16	1.00738	0.0280073
D12	25	SPX16	1.03802	0.0615431
D12	26	SPX16	1.09238	0.118811
D12	27	SPX16	1.18135	0.210673
D12	28	SPX16	1.33382	0.366049
D12	29	SPX16	1.55941	0.594539
D12	30	SPX16	1.82486	0.862888
D12	31	SPX16	2.07808	1.11901
D12	32	SPX16	2.29618	1.34001
D12	33	SPX16	2.45269	1.49942
D12	34	SPX16	2.57366	1.62329
D12	35	SPX16	2.67948	1.73201
D12	36	SPX16	2.76865	1.82407
D12	37	SPX16	2.82133	1.87966
D12	38	SPX16	2.87185	1.93308
D12	39	SPX16	2.91559	1.97972
D12	40	SPX16	2.9492	2.01623
E1	1	SPX13	0.328844	-0.00576856
E1	2	SPX13	0.335979	0.00116547
E1	3	SPX13	0.33425	-0.000765359
E1	4	SPX13	0.336645	0.00142771
E1	5	SPX13	0.332673	-0.00274565
E1	6	SPX13	0.336442	0.000821165
E1	7	SPX13	0.337815	0.00199202
E1	8	SPX13	0.336915	0.000890592
E1	9	SPX13	0.337069	0.000843126
E1	10	SPX13	0.33553	-0.000898304
E1	11	SPX13	0.336634	4.17842e-06
E1	12	SPX13	0.338022	0.00119077
E1	13	SPX13	0.335351	-0.00168163
E1	14	SPX13	0.338888	0.00165323
E1	15	SPX13	0.334958	-0.00247898
E1	16	SPX13	0.337265	-0.000373611
E1	17	SPX13	0.336718	-0.00112215
E1	18	SPX13	0.336985	-0.0010569
E1	19	SPX13	0.336689	-0.00155489
E1	20	SPX13	0.33984	0.0013943
E1	21	SPX13	0.339762	0.00111491
E1	22	SPX13	0.340194	0.00134547
E1	23	SPX13	0.349549	0.0104981
E1	24	SPX13	0.362945	0.0236923
E1	25	SPX13	0.381696	0.0422418
E1	26	SPX13	0.42672	0.0870644
E1	27	SPX13	0.50299	0.163132
E1	28	SPX13	0.631563	0.291503
E1	29	SPX13	0.845741	0.50548
E1	30	SPX13	1.13746	0.797
E1	31	SPX13	1.45949	1.11883
E1	32	SPX13	1.74893	1.40806
E1	33	SPX13	1.93757	1.5965
E1	34	SPX13	2.07646	1.73519
E1	35	SPX13	2.18501	1.84353
E1	36	SPX13	2.26587	1.9242
E1	37	SPX13	2.32164	1.97976
E1	38	SPX13	2.36665	2.02457
E1	39	SPX13	2.38828	2.046
E1	40	SPX13	2.40135	2.05887
E2	1	SPX13	0.351742	0.00452455
E2	2	SPX13	0.350305	0.00294029
E2	3	SPX13	0.348823	0.00131065
E2	4	SPX13	0.349468	0.00180883
E2	5	SPX13	0.350576	0.00276889
E2	6	SPX13	0.348348	0.000394339
E2	7	SPX13	0.349268	0.00116667
E2	8	SPX13	0.348606	0.000357458
E2	9	SPX13	0.348596	0.00020005
E2	10	SPX13	0.346542	-0.00200108
E2	11	SPX13	0.348569	-0.000120698
E2	12	SPX13	0.346557	-0.00228005
E2	13	SPX13	0.346856	-0.00212841
E2	14	SPX13	0.349399	0.000266932
E2	15	SPX13	0.346343	-0.00293615
E2	16	SPX13	0.34735	-0.0020762
E2	17	SPX13	0.349055	-0.00051783
E2	18	SPX13	0.347491	-0.00222994
E2	19	SPX13	0.346675	-0.00319323
E2	20	SPX13	0.346178	-0.00383719
E2	21	SPX13	0.349727	-0.000435487
E2	22	SPX13	0.355215	0.00490551
E2	23	SPX13	0.359034	0.00857693
E2	24	SPX13	0.367518	0.0169138
E2	25	SPX13	0.391973	0.0412217
E2	26	SPX13	0.425851	0.0749532
E2	27	SPX13	0.496222	0.145176
E2	28	SPX13	0.613648	0.262455
E2	29	SPX13	0.818534	0.467194
E2	30	SPX13	1.09316	0.741675
E2	31	SPX13	1.40593	1.05429
E2	32	SPX13	1.68376	1.33197
E2	33	SPX13	1.87704	1.52511
[truncated: 1,847 more rows]

## Sheet: BioGroup Analysis Result
Block Type	96alum
Chemistry	SYBR_GREEN
Experiment File Name	D:\ShuJu\LZM\13-16 spx iaa +lp.eds
Experiment Run End Time	2023-08-17 08:06:49 AM CST
Instrument Type	sds7500
Passive Reference	ROX
Biogroup Name	Target Name	Task	RQ	RQ Min	RQ Max	Cт Mean	ΔCт Mean	ΔCт SE	ΔΔCт
Analysis Type	Singleplex
Endogenous Control	SPX13
RQ Min/Max Confidence Level	95.0
Reference Biogroup Name

## Sheet: Technical Analysis Result
Block Type	96alum
Chemistry	SYBR_GREEN
Experiment File Name	D:\ShuJu\LZM\13-16 spx iaa +lp.eds
Experiment Run End Time	2023-08-17 08:06:49 AM CST
Instrument Type	sds7500
Passive Reference	ROX
Sample Name	Target Name	Task	RQ	RQ Min	RQ Max	Cт Mean	ΔCт Mean	ΔCт SE	ΔΔCт
0d	SPX14	UNKNOWN	1	0.18956	5.27538	36.1993	10.64	0.753909	0
0d	SPX15	UNKNOWN	1	0.630639	1.58569	26.6098	1.05052	0.239555	0
0d	SPX16	UNKNOWN	1	0.697388	1.43392	27.8463	2.28694	0.187277	0
1d lp	SPX14	UNKNOWN	7.02996	2.28796	21.6002	35.7855	7.82644	0.508872	-2.81352
1d lp	SPX15	UNKNOWN	4.57525	2.78633	7.51273	26.8158	-1.14333	0.257698	-2.19385
1d lp	SPX16	UNKNOWN	2.87425	1.80821	4.56876	28.7228	0.763756	0.240818	-1.52318
1d lp+iaa	SPX14	UNKNOWN	3.90283	2.7864	5.46659	35.7012	8.67544	0.15275	-1.96452
1d lp+iaa	SPX15	UNKNOWN	2.99934	1.83152	4.9118	26.4916	-0.534126	0.256301	-1.58465
1d lp+iaa	SPX16	UNKNOWN	2.43937	2.1146	2.81401	28.0262	1.00043	0.074239	-1.28651
5d lp	SPX14	UNKNOWN	2.19205			37.0033	9.50768		-1.13228
5d lp	SPX15	UNKNOWN	5.64797	4.55449	7.00398	26.0484	-1.44721	0.111813	-2.49773
5d lp	SPX16	UNKNOWN	4.42281	3.3559	5.82892	27.6376	0.141975	0.143444	-2.14496
5d lp+ iaa	SPX14	UNKNOWN
5d lp+ iaa	SPX15	UNKNOWN	8.1411	5.92083	11.194	25.9346	-1.9747	0.165472	-3.02522
5d lp+ iaa	SPX16	UNKNOWN	5.92279	4.66394	7.52141	27.63	-0.279336	0.124161	-2.56628
10d lp	SPX14	UNKNOWN	106.218	69.3411	162.708	32.0067	3.90907	0.221597	-6.73089
10d lp	SPX15	UNKNOWN	13.4522	10.0004	18.0954	25.3984	-2.69925	0.154077	-3.74977
10d lp	SPX16	UNKNOWN	3.89502	3.05961	4.95853	28.4229	0.32531	0.125442	-1.96163
10d lp+ iaa	SPX14	UNKNOWN	46.4048	19.1303	112.565	31.9226	5.10376	0.460451	-5.5362
10d lp+ iaa	SPX15	UNKNOWN	11.5302	4.79441	27.7295	24.342	-2.47683	0.455978	-3.52735
10d lp+ iaa	SPX16	UNKNOWN	3.47675	1.60254	7.54291	27.3081	0.4892	0.402451	-1.79774
5d lp	SPX8	UNKNOWN				36.2037	8.70803	1.0029
5d lp+ iaa	SPX8	UNKNOWN
10d lp	SPX8	UNKNOWN
10d lp+ iaa	SPX8	UNKNOWN				35.9036	9.08478
Analysis Type	Singleplex
Endogenous Control	SPX13
RQ Min/Max Confidence Level	95.0
Reference Sample	0d
