# Supplementary material for: Genome-wide identification and characterization of SPXdomain-containing genes family in eggplant
Source: PeerJ. 2024 May 28;12:e17341. doi: 10.7717/peerj.17341 (PMC11141551; doi:10.7717/peerj.17341)
Supplement: Supplemental Information 10 — Some details are in the manuscript and MIQE information files The Minimum Information for Publication of Quantitative Real-Time PCR Experiments [file peerj-12-17341-s010.xls]

## Sheet: Sheet1
ITEM TO CHECK	IMPORTANCE	CHECKLIST
EXPERIMENTAL DESIGN
Definition of experimental and control groups	E	P1 3-5
Number within each group	E	P1 7-8
Assay carried out by core lab or investigator's lab?	D
Acknowledgement of authors' contributions	D
SAMPLE
Description	E	P1 11-12
Volume/mass of sample processed	D
Microdissection or macrodissection	E	Microdissection
Processing procedure	E	P1 16
If frozen - how and how quickly?	E	P1 18
If fixed - with what, how quickly?	E	No fixed sample
Sample storage conditions and duration (especially for FFPE samples)	E	P1 22
NUCLEIC ACID EXTRACTION
Procedure and/or instrumentation	E	P1 26
Name of kit and details of any modifications	E	P1 26
Source of additional reagents used	D
Details of DNase or RNAse treatment	E	P1 28-29
Contamination assessment (DNA or RNA)	E	P1 31-32
Nucleic acid quantification	E	P1 31-32
Instrument and method	E	P1 31-32
Purity (A260/A280)	D
Yield	D
RNA integrity method/instrument	E	P1 31-32
RIN/RQI or Cq of 3' and 5' transcripts	E	P1 33
Electrophoresis traces	D
Inhibition testing (Cq dilutions, spike or other)	E	spike
REVERSE TRANSCRIPTION
Complete reaction conditions	E	P1 36 P2 37-38
Amount of RNA and reaction volume	E	P2 39
Priming oligonucleotide (if using GSP) and concentration	E	P2 42-44
Reverse transcriptase and concentration	E	P2 42-44
Temperature and time	E	P2 45-46
Manufacturer of reagents and catalogue numbers	D
Cqs with and without RT	D*
Storage conditions of cDNA	D
qPCR TARGET INFORMATION
If multiplex, efficiency and LOD of each assay.	E	P2 49-66
Sequence accession number	E	P2 49-66
Location of amplicon	D
Amplicon length	E	P2P3 68-84
In silico specificity screen (BLAST, etc)	E	P3 86
Pseudogenes, retropseudogenes or other homologs?	D
Sequence alignment	D
Secondary structure analysis of amplicon	D
Location of each primer by exon or intron (if applicable)	E	P3 88-89
What splice variants are targeted?	E	Not Applicable
qPCR OLIGONUCLEOTIDES
Primer sequences	E	P3P4 92-125
RTPrimerDB Identification Number	D
Probe sequences	D**
Location and identity of any modifications	E	Not Applicable
Manufacturer of oligonucleotides	D
Purification method	D
qPCR PROTOCOL
Complete reaction conditions	E	P2 36-37
Reaction volume and amount of cDNA/DNA	E	P2 36-37
Primer, (probe), Mg++ and dNTP concentrations	E	P2 36-37
Polymerase identity and concentration	E	P2 36-37
Buffer/kit identity and manufacturer	E	Monad
Exact chemical constitution of the buffer	D
Additives (SYBR Green I, DMSO, etc.)	E	SYBR Green I
Manufacturer of plates/tubes and catalog number	D
Complete thermocycling parameters	E	Manuscript P9 227-228
Reaction setup (manual/robotic)	D
Manufacturer of qPCR instrument	E	Applied Biosystems California, USA
qPCR VALIDATION
Evidence of optimisation (from gradients)	D
Specificity (gel, sequence, melt, or digest)	E	In raw data
For SYBR Green I, Cq of the NTC	E	In raw data
Standard curves with slope and y-intercept	E	In raw data
PCR efficiency calculated from slope	E	In raw data
Confidence interval for PCR efficiency or standard error	D
r2 of standard curve	E	In raw data
Linear dynamic range	E	In raw data
Cq variation at lower limit	E	In raw data
Confidence intervals throughout range	D
Evidence for limit of detection	E	In raw data
If multiplex, efficiency and LOD of each assay.	E	In raw data
DATA ANALYSIS
qPCR analysis program (source, version)	E	7500 software v2.3
Cq method determination	E	In raw data
Outlier identification and disposition	E	In raw data
Results of NTCs	E	In raw data
Justification of number and choice of reference genes	E	1 P1 5
Description of normalisation method	E	In raw data
Number and concordance of biological replicates	D
Number and stage (RT or qPCR) of technical replicates	E	3
Repeatability (intra-assay variation)	E	In raw data
Reproducibility (inter-assay variation, %CV)	D
Power analysis	D
Statistical methods for result significance	E	One Way ANOVA
Software (source, version)	E	spss,26.0
Cq or raw data submission using RDML	D
Table 1. MIQE checklist for authors, reviewers and editors. All essential information (E) must be submitted with the manuscript. Desirable
information (D) should be submitted if available. If using primers obtained from RTPrimerDB, information on qPCR target, oligonucleotides,
protocols and validation is available from that source.
*: Assessing the absence of DNA using a no RT assay is essential when first extracting RNA. Once the sample has been validated as
RDNA-free, inclusion of a no-RT control is desirable, but no longer essential.
**: Disclosure of the probe sequence is highly desirable and strongly encouraged. However, since not all commercial pre-designed assay
vendors provide this information, it cannot be an essential requirement. Use of such assays is advised against.
